# Supplementary material for: OS1423 板厚の変化を考慮したはり理諭の構築(OS14-5 接合材料,はりの弾性数理解析,OS-14 弾性数理解析の発展と新展開2)
Source: publisher site journal article supplement (doi:10.18632/aging.203158), 2011-07-16
Supplement: Supplementary file [file aging-v13i12-203158-supplementary-material-SD9.pdf]

**Supplementary Table 8. Methylation drives genes of prostate cancer for races.**

| <b>Races</b>              | <b>Genes</b>                                                                                                                                        |
|---------------------------|-----------------------------------------------------------------------------------------------------------------------------------------------------|
| White (compared to Asian) | GALR1, FABP5, OXGR1, DRC1, CSAG1, HRASLS5, SIAH3, DAPL1, MIR155HG, ACY3, CXCL5, SLURP1, MIA2, RP11-272D20.2, CT83, ADH6, ORM1                       |
| Black (compared to Asian) | 43535, DDX53, CSAG1, DCAF4L2, RLN1, CLK3P2, WIF1, FBLL1, TMEM26, PEX10, MIR155HG, SNX31, C1orf64, MAOB, MIA2                                        |
| White (compared to Black) | SNX31, MAGEA3, CLK3P2, DDX53, CSAG1, MAGEC1, RP3-407E4.4, DCAF4L2, DAPL1, C20orf85, MAGEC2, MAGEA6, CALML3, ACY3, CXCL5, C3orf30, CTAG2, CT83, ORM1 |
