# Supplementary material for: Comprehensive signature analysis of drug metabolism differences in the White, Black and Asian prostate cancer patients
Source: Aging (Albany NY). 2021 Jun 18;13(12):16316–40. doi: 10.18632/aging.203158 (PMC8266326; doi:10.18632/aging.203158)
Supplement: Supplementary Table 1 [file aging-13-203158-s002.xlsx]

## Sheet: mRNA
Supplementary Table 1A. Race differences in mRNA level.
Black vs Asian							White vs Asian							Black vs Asian
mRNA	logFC	logCPM	PValue	FDR	expression		mRNA	logFC	logCPM	PValue	FDR	expression		mRNA	logFC	logCPM	PValue	FDR	expression
CEP295NL	-5.26084	-2.05976	6.18e-15	1.21e-10	down-regulated		PPP1R17	5.28874	-3.72341	2.24021e-35	4.40268e-31	UP-regulated		SEMG2	5.00321	2.13864	1.53065e-40	1.61424e-36	UP-regulated
PPP1R17	-5.83592	-2.93343	5.84e-11	5.72e-07	down-regulated		LCN1	5.70433	-3.66489	4.6318e-32	4.55144e-28	UP-regulated		OPRD1	3.05877	-0.466392	1.64266e-40	1.61424e-36	UP-regulated
C1orf185	-5.35174	-3.04005	1.96e-09	1.28e-05	down-regulated		C1orf185	4.74616	-3.74793	8.04469e-22	5.27008e-18	UP-regulated		AL136295.1	4.29845	-0.200338	1.08944e-39	7.13726e-36	UP-regulated
ACTL6B	-3.75435	1.56976	1.34e-08	6.58e-05	down-regulated		CEP295NL	4.25992	-3.0435	3.28161e-21	1.61234e-17	UP-regulated		GABRG2	3.55254	-1.93204	7.97993e-37	3.92094e-33	UP-regulated
AL929554.1	-5.218	-3.64893	5.66e-08	0.000221792	down-regulated		ACTL6B	3.76933	0.243711	2.87371e-20	1.12954e-16	UP-regulated		SEMG1	5.69097	2.89392	1.94801e-36	7.65723e-33	UP-regulated
TDRD15	-4.65696	-3.38032	2.18e-07	0.000710499	down-regulated		MEFV	2.17047	-1.62894	1.29597e-15	4.24495e-12	UP-regulated		ECT2L	2.66485	-0.502427	6.64781e-33	2.1776e-29	UP-regulated
UTP15	-2.30328	5.3496	4.09e-07	0.001146	down-regulated		UTP15	2.14254	4.74775	4.95655e-13	1.37115e-09	UP-regulated		PATE1	4.60641	-2.09702	3.32709e-31	9.34152e-28	UP-regulated
TNP2	-5.93052	0.597991	9.24e-07	0.00226385	down-regulated		OLIG2	4.06755	-3.35751	5.58146e-13	1.37115e-09	UP-regulated		CALHM3	3.03642	-3.68006	8.35907e-29	2.05361e-25	UP-regulated
UNC5C	-2.38826	4.52933	1.08e-06	0.00236164	down-regulated		UBE2QL1	2.22871	4.10423	2.93348e-12	6.40574e-09	UP-regulated		CCDC122	2.60173	3.94804	4.69702e-26	1.02572e-22	UP-regulated
UBE2QL1	-2.24915	4.81025	1.65e-06	0.00323377	down-regulated		TDRD15	4.13819	-3.76561	3.12846e-11	6.14837e-08	UP-regulated		MAGEA8	3.29509	-2.20197	4.48793e-23	8.82058e-20	UP-regulated
MT4	-4.03997	-3.691	2.09e-06	0.00372691	down-regulated		UNC5C	2.0314	4.06849	1.56797e-09	2.80139e-06	UP-regulated		SPINK2	2.90604	-2.19475	6.56888e-23	1.17368e-19	UP-regulated
OLIG2	-4.27881	-2.52118	2.42e-06	0.00394578	down-regulated		ATOH7	2.68904	0.4223	1.98234e-09	3.24658e-06	UP-regulated		AC011511.4	2.89913	-3.73838	1.1722e-22	1.91987e-19	UP-regulated
OIP5	-2.40593	2.37341	2.71e-06	0.00408898	down-regulated		IL12A	2.14358	-1.59642	2.27584e-09	3.44054e-06	UP-regulated		CTAG2	4.51077	-2.03581	5.57947e-22	8.4353e-19	UP-regulated
PCDH17	-3.06468	2.55728	4.04e-06	0.00565724	down-regulated		ANKRD2	2.84772	-1.38451	3.35143e-09	4.70469e-06	UP-regulated		HAS1	2.5322	-2.81259	1.93338e-21	2.71419e-18	UP-regulated
ASIC5	-3.40921	-3.6131	4.73e-06	0.00618133	down-regulated		PPP1R2P9	4.26979	0.167706	1.08871e-08	1.42643e-05	UP-regulated		PAEP	3.01348	-3.41278	4.46299e-21	5.8477e-18	UP-regulated
MEFV	-1.97732	-1.13439	9.09e-06	0.0111364	down-regulated		ZNF99	2.78233	-2.97776	1.08269e-07	0.000132989	UP-regulated		CLDN2	2.78054	-2.15869	1.82187e-20	2.23794e-17	UP-regulated
C1orf127	-2.271	0.745241	1.31e-05	0.0150754	down-regulated		OIP5	1.87939	2.07533	7.75328e-07	0.000893491	UP-regulated		CD247	2.9685	1.73219	2.44308e-20	2.82449e-17	UP-regulated
TEX101	-2.8035	-0.363791	1.4e-05	0.0152663	down-regulated		TPBG	1.32019	3.94687	8.1834e-07	0.000893491	UP-regulated		ETV4	2.70356	5.47036	4.61232e-20	5.03614e-17	UP-regulated
FAM156B	-3.30155	-3.76858	1.52e-05	0.0156487	down-regulated		MYLK2	2.80655	-2.32917	3.59409e-06	0.00371761	UP-regulated		CIDEC	2.04509	-2.22868	2.68034e-17	2.7726e-14	UP-regulated
ATOH7	-2.66404	1.31254	1.63e-05	0.0159789	down-regulated		BIRC2	1.20049	5.49388	4.33914e-06	0.00426385	UP-regulated		AQP2	2.29874	-1.66666	8.67724e-17	8.52712e-14	UP-regulated
KRTAP13-2	-2.42517	-0.915294	2.78e-05	0.0259064	down-regulated		GGTLC2	2.47633	-3.04837	5.20167e-06	0.00486802	UP-regulated		METTL21C	2.9137	-3.02196	9.42843e-17	8.82411e-14	UP-regulated
GGTLC2	-2.98863	-2.86529	2.95e-05	0.0262655	down-regulated		FXYD4	1.72759	-2.20469	5.92232e-06	0.00529051	UP-regulated		CAPN12	2.58789	-0.874274	5.38015e-16	4.80643e-13	UP-regulated
PPP1R2P9	-4.61209	1.69414	3.2e-05	0.0272724	down-regulated		MYLK3	1.69408	-0.118483	7.93123e-06	0.00677707	UP-regulated		CBLN2	2.70935	0.338138	2.00551e-14	1.71375e-11	UP-regulated
FXYD4	-1.84235	-1.87094	7.8e-05	0.0636364	down-regulated		LINC00116	1.98628	6.33224	1.26115e-05	0.0103273	UP-regulated		KLK14	3.07057	1.82549	5.55022e-14	4.54517e-11	UP-regulated
TRIM49	-2.89865	-2.11926	0.000132235	0.10363	down-regulated		PCDH17	2.21067	2.48879	1.78936e-05	0.0140665	UP-regulated		MT1A	1.37922	0.658899	6.32148e-14	4.96969e-11	UP-regulated
AC010542.3	-2.98172	-3.55561	0.000160221	0.120733	down-regulated		NPIPB13	2.55409	-2.40646	3.01081e-05	0.0227583	UP-regulated		GLYATL3	3.1422	-1.77273	1.08925e-12	8.23389e-10	UP-regulated
FGF4	-3.35023	-3.68317	0.000192012	0.13933	down-regulated		EXD1	2.60703	2.73339	3.69055e-05	0.026408	UP-regulated		MAFA	1.68576	-2.13779	2.19018e-12	1.59429e-09	UP-regulated
SPATA4	-2.4174	3.38585	0.000200179	0.140068	down-regulated		LIN52	1.0607	4.31642	3.7624e-05	0.026408	UP-regulated		LCN1	2.51167	-3.88819	5.21968e-12	3.66384e-09	UP-regulated
GOLGA8S	-2.16183	-3.28573	0.000310165	0.209543	down-regulated		KBTBD13	2.11896	-2.12197	4.36386e-05	0.0295735	UP-regulated		PRB4	2.75308	-3.50677	5.43383e-12	3.68264e-09	UP-regulated
APH1B	-2.32422	5.06187	0.00034254	0.223702	down-regulated		MYOZ2	1.98843	0.224306	4.67238e-05	0.0303717	UP-regulated		OR2T10	3.09169	-2.41664	9.3523e-12	6.127e-09	UP-regulated
OR51G2	-3.02791	-3.43437	0.000401363	0.253662	down-regulated		PTPRR	2.17497	4.16557	4.79073e-05	0.0303717	UP-regulated		B3GNT3	1.34628	1.80914	2.08185e-11	1.31989e-08	UP-regulated
IL12A	-1.97927	-0.963727	0.000483092	0.295756	down-regulated		ECT2L	1.73414	-1.00672	5.224e-05	0.0320835	UP-regulated		ART3	2.32084	-0.96706	2.51234e-11	1.54305e-08	UP-regulated
CBWD3	-2.35484	6.39858	0.000498161	0.295756	down-regulated		DAGLA	1.10372	2.9148	5.82228e-05	0.0346743	UP-regulated		FABP4	1.6108	0.30604	3.46624e-11	2.06441e-08	UP-regulated
NPIPB13	-2.63637	-2.00554	0.000837256	0.431671	down-regulated		CCDC87	1.26746	1.45557	6.45745e-05	0.0373259	UP-regulated		SLC24A4	1.8515	-1.67198	4.60358e-11	2.66114e-08	UP-regulated
KRT36	-2.48488	-2.37552	0.000895053	0.449638	down-regulated		CBWD3	2.13174	5.83908	0.000133399	0.0749052	UP-regulated		HBA1	1.88934	-3.44488	5.11075e-11	2.86991e-08	UP-regulated
FGF3	-2.73419	-3.89799	0.00104032	0.509548	down-regulated		TRDN	2.86217	0.634725	0.000196246	0.105086	UP-regulated		HTN3	2.63309	-3.27527	1.07936e-10	5.89269e-08	UP-regulated
MYLK3	-1.62873	0.22227	0.00109722	0.524309	down-regulated		METTL21C	2.40584	-3.30583	0.000197842	0.105086	UP-regulated		LRRC40	1.17273	3.36224	1.12151e-10	5.95734e-08	UP-regulated
C16orf78	-2.86133	-3.13389	0.0014478	0.65082	down-regulated		TRIM49	2.33827	-2.5081	0.000260865	0.131456	UP-regulated		GNGT1	1.67487	-4.10818	3.08191e-09	1.55312e-06	UP-regulated
ELAVL2	-1.47412	1.2981	0.00145985	0.65082	down-regulated		GOLGA8S	1.9009	-3.42431	0.00030642	0.149685	UP-regulated		GZMA	1.36128	3.05733	4.6885e-09	2.30369e-06	UP-regulated
C8orf22	-2.59105	-2.71743	0.00149484	0.65082	down-regulated		IFNA6	3.21124	0.681933	0.000326854	0.152945	UP-regulated		SERTM1	1.81402	-2.34829	6.19999e-09	2.97206e-06	UP-regulated
FAM9C	-2.07941	-3.28801	0.00152893	0.651193	down-regulated		KCNRG	1.80968	3.47311	0.000340954	0.155832	UP-regulated		HBA2	2.0822	0.464792	7.11204e-09	3.32809e-06	UP-regulated
FAM25C	-2.61809	-4.0323	0.00171864	0.70149	down-regulated		C8orf22	2.34352	-2.97972	0.000360879	0.156642	UP-regulated		WNT9B	1.44083	-2.99313	1.12639e-08	5.14837e-06	UP-regulated
BIRC2	-1.29583	5.77511	0.00185928	0.728541	down-regulated		AMPD1	1.74815	-1.04228	0.000366638	0.156642	UP-regulated		IL22RA2	1.47822	-2.35221	1.81681e-08	8.11534e-06	UP-regulated
BPIFC	-2.14912	-2.41705	0.0021227	0.81545	down-regulated		FAM71F2	1.08745	1.44979	0.000433837	0.174515	UP-regulated		MGAM	1.41958	-1.90176	2.95676e-08	1.29138e-05	UP-regulated
TPBG	-1.30021	4.32676	0.00240816	0.890202	down-regulated		TEPP	1.43771	-0.271063	0.000434653	0.174515	UP-regulated		CLEC3A	1.46159	0.480804	3.8566e-08	1.64777e-05	UP-regulated
CT45A5	-3.1142	-3.77958	0.00245638	0.891211	down-regulated		DYNLRB2	1.52794	3.20979	0.000435111	0.174515	UP-regulated		LBP	1.6652	-2.8857	4.13172e-08	1.72776e-05	UP-regulated
LCN1	-3.11435	-2.43973	0.00269441	0.959799	down-regulated		C1orf127	1.5677	0.672514	0.00046806	0.180106	UP-regulated		C10orf82	1.76914	-2.29288	5.05137e-08	2.0035e-05	UP-regulated
RNF186	-2.55893	4.8135	0.00278365	0.973881	down-regulated		KLHL41	2.71235	1.79728	0.000470472	0.180106	UP-regulated		HPR	1.87403	-3.17513	5.09692e-08	2.0035e-05	UP-regulated
AC010327.1	-2.49077	-3.31758	0.00304212	1	down-regulated		BMPR2	1.20515	8.34651	0.000476545	0.180106	UP-regulated		RBP3	1.39406	-3.92562	6.77927e-08	2.61254e-05	UP-regulated
HES7	-1.93219	0.965425	0.00316109	1	down-regulated		EIF2B1	1.90929	6.73467	0.000493455	0.182979	UP-regulated		OR5M11	2.41364	-3.22446	8.77212e-08	3.25297e-05	UP-regulated
SLX4IP	-1.66482	5.87607	0.00318577	1	down-regulated		MS4A8	1.52584	3.70959	0.000583038	0.208335	UP-regulated		GRM3	1.19859	-2.07405	1.14238e-07	4.15783e-05	UP-regulated
CRYGD	-2.0509	-3.90556	0.00322307	1	down-regulated		BDH2	1.02323	3.49362	0.000609138	0.213775	UP-regulated		ACTR8	1.28831	6.4149	1.62448e-07	5.80499e-05	UP-regulated
COLEC10	-1.92266	-3.50411	0.00368725	1	down-regulated		GNL1	1.00809	7.27132	0.000653938	0.225471	UP-regulated		ASTL	1.2745	-3.21038	1.90985e-07	6.58529e-05	UP-regulated
ZAN	-1.91396	-3.61306	0.00369234	1	down-regulated		DUPD1	2.50327	-3.3497	0.000836199	0.269407	UP-regulated		RHCG	1.78799	-0.892442	1.94781e-07	6.60038e-05	UP-regulated
DAGLA	-1.24692	3.14002	0.0037281	1	down-regulated		TBP	1.00588	5.21873	0.000983879	0.303873	UP-regulated		ZNF625-ZNF20	1.84783	-1.32457	2.50204e-07	8.06148e-05	UP-regulated
CDKL4	-1.78944	-3.60273	0.00373073	1	down-regulated		TAS2R42	2.03367	-3.93226	0.000989564	0.303873	UP-regulated		BX248409.2	2.63218	4.04575	3.10305e-07	9.83668e-05	UP-regulated
NOL4L	-1.44637	4.73923	0.00391039	1	down-regulated		MAP3K20	1.2362	8.32095	0.00103416	0.312682	UP-regulated		OR14I1	1.5761	-3.35257	6.72873e-07	0.000203456	UP-regulated
TMEM174	-2.47179	-3.9616	0.00404665	1	down-regulated		KCNA7	1.91701	-3.25367	0.00106405	0.315342	UP-regulated		CD79A	1.08352	1.28799	8.18591e-07	0.000243766	UP-regulated
LAMA1	-2.46948	0.0643215	0.00423696	1	down-regulated		AC068790.8	1.89483	1.99729	0.00107505	0.315342	UP-regulated		IRF4	1.45326	-0.384492	1.06487e-06	0.000294773	UP-regulated
CST1	-2.72982	2.02185	0.00435963	1	down-regulated		CT45A5	2.69768	-3.91475	0.00109897	0.317619	UP-regulated		ANKRD2	1.40832	-1.43972	1.23251e-06	0.00033644	UP-regulated
EIF2B1	-1.86625	7.35267	0.00485812	1	down-regulated		TMEM40	1.65424	3.92318	0.00132252	0.371306	UP-regulated		CARTPT	1.94559	0.220534	1.71041e-06	0.000448218	UP-regulated
CCDC138	-1.39437	4.29076	0.00493912	1	down-regulated		B3GNT3	1.17475	1.59907	0.0016299	0.451161	UP-regulated		GPD1	1.53319	-1.73034	2.64351e-06	0.000657666	UP-regulated
OPRM1	-2.18156	-4.04586	0.00494777	1	down-regulated		OR51B4	2.11485	0.327285	0.00176391	0.477639	UP-regulated		FCRL5	1.63113	-1.31051	2.86422e-06	0.000703668	UP-regulated
OR51B4	-2.2682	0.889814	0.00498479	1	down-regulated		CRIP1	1.4315	-0.234633	0.00184454	0.477639	UP-regulated		DMRT2	1.33886	-3.44606	2.91165e-06	0.00070649	UP-regulated
OR7G3	-2.72118	1.06286	0.00500077	1	down-regulated		SPTA1	1.52034	-2.48471	0.00184872	0.477639	UP-regulated		GPRC6A	1.46406	-3.50072	3.37003e-06	0.000807738	UP-regulated
LIN52	-1.15424	4.57646	0.00505831	1	down-regulated		HCN1	1.91634	-3.58056	0.00186753	0.477639	UP-regulated		TUSC5	1.4183	-2.92903	4.96885e-06	0.0011766	UP-regulated
TDRD1	-1.49061	4.24849	0.00518215	1	down-regulated		KRT36	1.92046	-2.40731	0.00187138	0.477639	UP-regulated		SLC16A12	1.35203	-1.86556	5.097e-06	0.00119258	UP-regulated
SLC30A8	-1.87653	-2.91132	0.00535282	1	down-regulated		MYOM3	2.33609	0.542171	0.00206243	0.506661	UP-regulated		PVALB	1.19486	-3.41965	7.7559e-06	0.00171275	UP-regulated
CDX4	-2.63739	-3.53044	0.00538312	1	down-regulated		FAM156B	2.19805	-3.78519	0.00213175	0.517226	UP-regulated		AICDA	1.26314	-3.90778	9.09568e-06	0.00198384	UP-regulated
UNC5A	-1.67503	2.41845	0.0055131	1	down-regulated		FOXRED1	1.30889	7.49778	0.00217507	0.520634	UP-regulated		CDH18	1.42969	-2.97254	1.22562e-05	0.00256258	UP-regulated
PTPRR	-2.04036	4.91746	0.0055943	1	down-regulated		FPR1	1.01291	0.861401	0.00224107	0.520634	UP-regulated		DYNLRB2	1.05909	3.43602	1.52766e-05	0.00300247	UP-regulated
DNAI2	-1.61252	-3.53534	0.0057818	1	down-regulated		PPP1R27	2.08459	-2.18142	0.00230439	0.520634	UP-regulated		IL21	1.47418	-4.04033	1.99127e-05	0.0038749	UP-regulated
SMTNL1	-2.19139	-1.4311	0.00591052	1	down-regulated		CKM	1.48489	4.10033	0.00252079	0.520634	UP-regulated		C2CD4B	1.04452	-0.045668	2.03997e-05	0.00393074	UP-regulated
KIR3DL1	-2.40749	0.531001	0.00599309	1	down-regulated		STAC3	1.35998	1.88256	0.00252296	0.520634	UP-regulated		FUT7	1.02151	-1.97845	2.55005e-05	0.00468399	UP-regulated
SAXO2	-1.18358	2.42125	0.00600437	1	down-regulated		MYO18B	1.38767	-0.0921951	0.00254317	0.520634	UP-regulated		MSLN	1.65696	0.301263	2.83884e-05	0.00516616	UP-regulated
CT45A9	-2.51797	-2.53055	0.00623516	1	down-regulated		RNF186	2.09529	4.38326	0.00261432	0.526032	UP-regulated		OR2T5	1.39961	-4.1077	5.96735e-05	0.00993918	UP-regulated
TVP23C-CDRT4	-1.43476	-1.80133	0.00643375	1	down-regulated		KLHL32	1.09553	1.50229	0.00265055	0.526032	UP-regulated		EDDM3B	1.33408	-4.12145	6.39836e-05	0.0104795	UP-regulated
TAS2R42	-2.2503	-3.81207	0.00663295	1	down-regulated		CCL16	1.38878	0.192255	0.00288695	0.527883	UP-regulated		SLPI	1.80486	3.95337	7.58834e-05	0.011722	UP-regulated
OXGR1	-1.52567	2.6336	0.00736295	1	down-regulated		DPCR1	1.81864	1.56055	0.00308713	0.54659	UP-regulated		POU2AF1	1.26984	0.410118	7.9829e-05	0.0121515	UP-regulated
MYLK2	-2.36841	-1.60947	0.00775126	1	down-regulated		CA3	2.49519	2.77402	0.00318165	0.558294	UP-regulated		FOXI1	1.04989	-0.42946	8.16187e-05	0.0121515	UP-regulated
TMEM212	-2.01436	-3.65698	0.00797835	1	down-regulated		ACTN2	1.62329	3.99284	0.00346176	0.5916	UP-regulated		C9orf92	1.17665	-3.07204	8.22297e-05	0.0121515	UP-regulated
AL139353.1	-1.04165	0.349318	0.00820154	1	down-regulated		LYPD8	2.34853	-1.81887	0.00355384	0.595666	UP-regulated		TNFRSF17	1.24739	-2.37562	9.16866e-05	0.0132501	UP-regulated
CTNNA3	-1.37994	-1.80479	0.00834899	1	down-regulated		EPO	1.91242	-1.30998	0.00374677	0.613628	UP-regulated		CCKBR	1.23636	-1.91238	9.28867e-05	0.0132787	UP-regulated
ADAMTS9	-1.16982	5.05479	0.0085603	1	down-regulated		AC083902.2	1.94279	-1.86467	0.00390762	0.624361	UP-regulated		LEFTY2	1.50695	-0.324589	0.000100841	0.0141567	UP-regulated
LRRTM2	-1.54129	-2.53204	0.00910449	1	down-regulated		TNP2	2.92492	0.172893	0.00421487	0.652242	UP-regulated		KLK13	1.13227	-0.573836	0.000117346	0.0159167	UP-regulated
CPLX2	-1.75794	-0.806582	0.00976632	1	down-regulated		MISP	1.76359	3.40133	0.00437369	0.660383	UP-regulated		SPINT3	1.29879	-3.97552	0.000129908	0.0167871	UP-regulated
TMEM40	-1.62891	4.45889	0.00984563	1	down-regulated		KIR3DL1	2.00365	0.14253	0.00444975	0.660383	UP-regulated		NPAS4	1.25367	-2.04763	0.00013056	0.0167871	UP-regulated
CFAP77	-1.32491	-2.31166	0.0102218	1	down-regulated		ARL10	1.51075	7.79415	0.00446042	0.660383	UP-regulated		PRH2	1.21717	-3.10724	0.0001421	0.0179912	UP-regulated
HEXIM2	-1.14118	3.07495	0.0106465	1	down-regulated		ACTA1	2.49375	3.88641	0.00453629	0.660383	UP-regulated		C5orf46	1.28303	-2.0526	0.000176165	0.0215053	UP-regulated
MS4A8	-1.50665	3.94004	0.0110595	1	down-regulated		GALR2	1.03811	-2.40786	0.00462735	0.668686	UP-regulated		RSPO4	1.11403	-2.6409	0.000178501	0.0216559	UP-regulated
AC068790.8	-1.87162	2.60709	0.0110914	1	down-regulated		CASQ1	2.15771	0.70866	0.00475263	0.676836	UP-regulated		TNMD	1.15555	-2.10687	0.000224839	0.026461	UP-regulated
MUC6	-2.76231	3.51752	0.0114066	1	down-regulated		RBFOX1	1.90236	-1.21103	0.00498777	0.701858	UP-regulated		EN1	1.17521	-3.32365	0.000234723	0.0274598	UP-regulated
RXFP2	-2.13212	-3.97231	0.011736	1	down-regulated		AC104831.1	2.51517	-1.14111	0.00499975	0.701858	UP-regulated		PLA2G4D	1.65638	1.5456	0.000243679	0.0283388	UP-regulated
LINC00116	-1.58993	7.19566	0.0117534	1	down-regulated		C2orf80	1.61377	-3.73128	0.00510574	0.70695	UP-regulated		ZSCAN4	1.02655	-3.49985	0.000254319	0.0294023	UP-regulated
LINC00633	-2.02406	-3.77844	0.0120473	1	down-regulated		VGLL2	2.43667	-3.01542	0.00533869	0.716114	UP-regulated		MAK16	1.41611	9.56223	0.000260316	0.0298437	UP-regulated
TBP	-1.09955	5.47825	0.0123707	1	down-regulated		PAQR9	1.59506	-3.93649	0.00535637	0.716114	UP-regulated		NEUROG3	1.26473	-3.95203	0.000261174	0.0298437	UP-regulated
C2orf80	-1.74657	-3.60403	0.0132369	1	down-regulated		CAVIN4	1.95175	-0.932609	0.00547571	0.717156	UP-regulated		OR10G7	1.86752	-2.58003	0.000267517	0.0303918	UP-regulated
IGSF10	-1.62263	1.56372	0.0149909	1	down-regulated		SLX4IP	1.25567	5.73373	0.00548802	0.717156	UP-regulated		FCRL2	1.32363	-2.14333	0.000322241	0.0351851	UP-regulated
ZNF99	-1.93558	-2.04272	0.015102	1	down-regulated		ADAD2	1.56484	4.38122	0.00557118	0.720332	UP-regulated		TARM1	1.57353	-3.8111	0.000332438	0.0357403	UP-regulated
CROCC	-1.51155	8.72857	0.0151026	1	down-regulated		FAM25C	2.01784	-4.05934	0.00577376	0.728944	UP-regulated		FAM180B	1.0604	-3.66901	0.000332781	0.0357403	UP-regulated
ELMOD1	-1.26104	-0.041504	0.0154324	1	down-regulated		OR1A1	1.95753	-4.08513	0.00579544	0.728944	UP-regulated		OTC	1.2091	-3.79851	0.000364226	0.0384866	UP-regulated
FOXD4	-1.15607	1.07036	0.0154907	1	down-regulated		MYPN	1.60666	-0.4602	0.00586391	0.728944	UP-regulated		PON3	1.10241	-2.46237	0.000469873	0.0478492	UP-regulated
B3GNTL1	-1.18066	4.94484	0.0154963	1	down-regulated		FOXD4	1.00157	0.858519	0.00591342	0.728944	UP-regulated		DCAF12L1	1.04181	-3.1813	0.000477196	0.0483444	UP-regulated
GALR2	-1.21559	-2.26809	0.0155007	1	down-regulated		MYH7	2.75785	5.0043	0.00591765	0.728944	UP-regulated		CALB2	1.05573	-2.2159	0.000581976	0.0559817	UP-regulated
LINC01314	-1.40372	1.62418	0.0155555	1	down-regulated		ZIM3	1.63853	-4.04303	0.0059716	0.728944	UP-regulated		ANKRD1	1.11093	0.221903	0.000590155	0.0563053	UP-regulated
KBTBD13	-1.83094	-1.45791	0.0163848	1	down-regulated		SMYD1	1.87891	-0.25082	0.00647744	0.747754	UP-regulated		ITLN2	1.229	-0.863332	0.000619376	0.0570894	UP-regulated
IFNA6	-2.77522	1.93226	0.0164632	1	down-regulated		SHISA8	1.84754	-1.08093	0.00668299	0.754832	UP-regulated		SPOCK2	1.58975	3.92753	0.000629435	0.0570894	UP-regulated
CCL16	-1.31535	0.651006	0.0165571	1	down-regulated		APOBEC2	2.11706	-0.737389	0.00689807	0.764751	UP-regulated		GABRA1	1.34121	-0.439398	0.000665815	0.0594815	UP-regulated
TEPP	-1.24668	0.254835	0.0167137	1	down-regulated		AC010327.1	1.94885	-3.46166	0.00696537	0.764751	UP-regulated		ATP6V0A4	1.22098	-2.02935	0.000746903	0.0652428	UP-regulated
LRIT3	-1.21785	0.52948	0.0167917	1	down-regulated		BTBD17	1.50419	-3.36206	0.00731517	0.785602	UP-regulated		MS4A1	1.45893	0.409714	0.000793699	0.0684117	UP-regulated
LYPD8	-2.46949	-1.46752	0.0168055	1	down-regulated		NEUROD1	1.6489	-2.53293	0.00737283	0.787491	UP-regulated		NCAM2	1.45895	1.86566	0.000839921	0.0708489	UP-regulated
OR7C2	-2.1106	-3.91326	0.0168305	1	down-regulated		AKR1B15	1.78845	-3.16503	0.00773661	0.803633	UP-regulated		ATP6V0D2	1.07772	-1.63705	0.000874813	0.0722419	UP-regulated
TGIF2LY	-2.02204	0.56843	0.0179093	1	down-regulated		CROCC	1.38272	8.37866	0.0083637	0.833388	UP-regulated		SYCP1	1.8381	-2.3365	0.000986365	0.0794509	UP-regulated
CXorf49B	-1.9221	-0.540684	0.0184431	1	down-regulated		SRRM5	1.11357	0.634918	0.00839622	0.833388	UP-regulated		OR6K2	1.72303	1.49253	0.00113343	0.0883982	UP-regulated
MYOZ2	-1.48859	0.907573	0.0189867	1	down-regulated		DEFB1	1.52821	4.67002	0.00851385	0.836614	UP-regulated		KCNA5	1.08292	-1.78995	0.00115374	0.0889238	UP-regulated
KRT78	-1.90027	-3.73523	0.0197679	1	down-regulated		AGBL1	1.69282	-3.2265	0.00871026	0.851656	UP-regulated		KRT24	1.01655	-3.54419	0.00118072	0.0899452	UP-regulated
KLK8	-1.65983	-3.72069	0.0198002	1	down-regulated		UNC45B	1.77266	-0.917939	0.00881763	0.853086	UP-regulated		NOS2	1.23381	-0.747157	0.0012006	0.0909183	UP-regulated
FAM71F2	-1.0243	1.80358	0.0204509	1	down-regulated		STPG2	1.44845	2.5681	0.00920739	0.86713	UP-regulated		IL6	1.39296	0.810095	0.00124389	0.0923545	UP-regulated
KCNRG	-1.54665	4.19958	0.0205836	1	down-regulated		GPR25	1.22681	-2.43784	0.00927495	0.86713	UP-regulated		NXPE4	1.15199	-0.651853	0.00136794	0.0984819	UP-regulated
COL2A1	-1.66374	4.60005	0.0207587	1	down-regulated		SMTNL1	1.76362	-1.49963	0.0095882	0.87764	UP-regulated		C9orf131	1.06294	-1.39077	0.0014115	0.100878	UP-regulated
BAIAP3	-1.01503	7.15816	0.0214893	1	down-regulated		GALP	1.68604	-4.07058	0.0101861	0.914099	UP-regulated		CD19	1.25044	-1.07535	0.00142856	0.101693	UP-regulated
CST4	-1.78895	-2.3958	0.0215093	1	down-regulated		GPR101	1.61448	-3.8799	0.0104038	0.924751	UP-regulated		OR2T35	1.15822	-4.15548	0.00169096	0.114997	UP-regulated
OR10W1	-2.14678	-3.93038	0.0215846	1	down-regulated		AC034102.2	1.95068	0.650577	0.0104489	0.924751	UP-regulated		AC110814.1	1.3713	2.18569	0.00174134	0.116807	UP-regulated
SPATA31D1	-2.25507	-1.61393	0.0219342	1	down-regulated		LOXHD1	1.48559	-0.209998	0.0105871	0.924751	UP-regulated		SLC6A5	1.02107	-4.0355	0.00176691	0.117731	UP-regulated
LOXHD1	-1.61473	0.151566	0.0219673	1	down-regulated		DHRS7C	1.93222	-3.66558	0.0109601	0.926315	UP-regulated		CU639417.2	1.18192	2.34092	0.00204657	0.130172	UP-regulated
GPR101	-1.69042	-3.81872	0.0233049	1	down-regulated		OXGR1	1.19672	2.4955	0.0110555	0.926315	UP-regulated		FCGBP	1.43307	3.5691	0.0021356	0.134099	UP-regulated
ARHGAP36	-1.44005	2.36713	0.0240626	1	down-regulated		CAMK2A	1.34824	-1.35126	0.0111146	0.926315	UP-regulated		GJD2	1.04049	-3.83514	0.00222463	0.138364	UP-regulated
EMSY	-1.01611	6.17691	0.0242629	1	down-regulated		SLC32A1	1.84552	-3.70678	0.0111241	0.926315	UP-regulated		FP565260.2	1.19059	-3.23116	0.002569	0.151127	UP-regulated
BIRC5	-1.28915	6.11987	0.0243091	1	down-regulated		PLA2G4E	1.46699	4.05101	0.0122023	0.971001	UP-regulated		MFSD2A	1.08198	-0.505332	0.00315608	0.17681	UP-regulated
LRRC30	-2.0868	-3.69501	0.0243228	1	down-regulated		ZNF625-ZNF20	1.6458	-1.64591	0.0127492	0.998245	UP-regulated		KRTAP16-1	1.21333	-0.43028	0.00315826	0.17681	UP-regulated
ZPLD1	-1.47391	-1.48084	0.0243492	1	down-regulated		PNMA3	1.24704	3.4421	0.0131293	1	UP-regulated		JAKMIP1	1.20571	0.7498	0.00316664	0.17681	UP-regulated
ADAD2	-1.55463	4.87866	0.0248749	1	down-regulated		CAMK1D	1.05165	6.81726	0.0133886	1	UP-regulated		ICOS	1.04462	-1.42696	0.00358288	0.193456	UP-regulated
C19orf67	-1.63919	2.53749	0.0256773	1	down-regulated		ASIC5	1.89869	-3.51937	0.0136618	1	UP-regulated		ADAMDEC1	1.13026	-0.223621	0.00371469	0.196788	UP-regulated
PAGE2B	-1.85901	-3.85319	0.0262167	1	down-regulated		COX6A2	2.1378	-0.338394	0.0138411	1	UP-regulated		AL109827.1	1.47318	-4.03514	0.00385708	0.203236	UP-regulated
NKD2	-1.05413	2.35839	0.0263758	1	down-regulated		ANKRD1	1.48326	0.19706	0.0144754	1	UP-regulated		PPP1R27	1.10827	-2.22979	0.00402686	0.208273	UP-regulated
TAF1D	-1.32287	4.87878	0.0264964	1	down-regulated		TNNI1	2.06316	3.24377	0.0144778	1	UP-regulated		PRORY	1.4793	-3.83663	0.00405115	0.20898	UP-regulated
ARHGDIG	-2.03058	0.93241	0.0265911	1	down-regulated		TMCO5A	1.66947	-3.24961	0.0150122	1	UP-regulated		PARP15	1.05258	-1.04506	0.00416434	0.212199	UP-regulated
TRDN	-2.20801	1.63744	0.0273205	1	down-regulated		MYL2	2.42512	3.46079	0.0168587	1	UP-regulated		FOSB	1.49399	6.95396	0.00450753	0.224281	UP-regulated
UGT2A1	-1.86707	-3.89497	0.0280859	1	down-regulated		UGT2A1	1.83085	-3.96766	0.0169344	1	UP-regulated		USP17L28	1.44255	2.62432	0.00505977	0.244336	UP-regulated
CCDC87	-1.13913	1.92534	0.0281592	1	down-regulated		GSTO2	1.23042	8.40961	0.01701	1	UP-regulated		C11orf87	1.19909	3.50696	0.00516201	0.24849	UP-regulated
AD000671.2	-1.21769	-2.70429	0.028335	1	down-regulated		APLN	1.03089	6.11155	0.0172835	1	UP-regulated		FOXA2	1.09345	-1.48361	0.00517109	0.24849	UP-regulated
DYDC2	-1.41122	-3.10107	0.0284397	1	down-regulated		NRAP	2.12086	2.64175	0.0173335	1	UP-regulated		S100A7	1.06537	-3.45501	0.00532244	0.253286	UP-regulated
PNMA3	-1.37715	3.7436	0.0287947	1	down-regulated		HTR3B	1.6975	-3.97209	0.0178089	1	UP-regulated		APOA4	1.31479	-3.94229	0.00548139	0.25841	UP-regulated
GOT2	-1.36754	8.46982	0.0288821	1	down-regulated		CSRP3	1.93643	1.00443	0.0178488	1	UP-regulated		IGLL5	1.14756	2.0077	0.00556588	0.260403	UP-regulated
LENEP	-1.16984	-2.22598	0.0289409	1	down-regulated		OR6K2	2.13731	1.14117	0.0179097	1	UP-regulated		FAM9A	1.23452	-1.32003	0.00557798	0.260403	UP-regulated
MTFR2	-1.11114	-1.12773	0.0295668	1	down-regulated		ZPLD1	1.33455	-1.74684	0.0179454	1	UP-regulated		DUSP5	1.09397	3.6455	0.00606049	0.269939	UP-regulated
DPCR1	-1.71916	2.18534	0.0296757	1	down-regulated		HES7	1.4168	0.837762	0.0179673	1	UP-regulated		CA3	1.36391	2.73847	0.00625529	0.273812	UP-regulated
APLN	-1.21155	6.32986	0.0301139	1	down-regulated		ACOT6	1.32333	-2.90775	0.0187306	1	UP-regulated		JCHAIN	1.33631	4.36171	0.00627305	0.273979	UP-regulated
MAP3K20	-1.07563	8.81086	0.0305917	1	down-regulated		HHATL	1.65897	-1.69261	0.0192047	1	UP-regulated		AC233724.6	1.1348	-3.64773	0.00703173	0.293422	UP-regulated
PPP1R2P3	-1.23509	-2.54605	0.0308509	1	down-regulated		TMEM151B	1.00695	-2.32442	0.0196144	1	UP-regulated		CAPNS2	1.03092	-1.39364	0.00734315	0.303198	UP-regulated
BRS3	-1.57528	-3.91862	0.0316184	1	down-regulated		MGAM	1.17553	-2.01477	0.0199949	1	UP-regulated		GOT1L1	1.24598	-1.7865	0.00783446	0.320121	UP-regulated
LHFPL3	-1.55539	-3.01381	0.0320859	1	down-regulated		FSD2	1.31256	-2.50359	0.0201987	1	UP-regulated		FGA	1.29393	-2.06322	0.00854629	0.335937	UP-regulated
AKR1B15	-1.68513	-2.94269	0.0323523	1	down-regulated		WNT4	1.08824	6.41809	0.0204577	1	UP-regulated		NRXN1	1.07503	0.351057	0.00896062	0.345318	UP-regulated
LY6H	-1.80461	-1.40437	0.0324487	1	down-regulated		RPL3L	1.69489	-0.546117	0.021104	1	UP-regulated		CD69	1.02843	1.24048	0.010152	0.377892	UP-regulated
SYNGR4	-1.56054	0.573714	0.0325355	1	down-regulated		ASB17	1.65427	-0.757653	0.0211694	1	UP-regulated		OR10H3	1.03611	-2.42405	0.0104039	0.382201	UP-regulated
LIM2	-2.06835	-3.74793	0.0327848	1	down-regulated		SLC22A31	1.16133	4.47204	0.0213391	1	UP-regulated		TCL1A	1.01724	-2.25174	0.0107692	0.385969	UP-regulated
SHISA8	-1.81307	-0.791687	0.0328945	1	down-regulated		OR3A3	1.30646	-4.09462	0.0218849	1	UP-regulated		OR2AG1	1.41558	3.58622	0.0107719	0.385969	UP-regulated
CROCC2	-1.1994	-3.35065	0.0334628	1	down-regulated		RPRML	1.67517	-1.70011	0.0222995	1	UP-regulated		PRSS1	1.0296	-3.6057	0.010786	0.385969	UP-regulated
OPRK1	-1.2894	7.2102	0.0336931	1	down-regulated		LMOD2	1.6166	0.617815	0.0227699	1	UP-regulated		TBC1D3D	1.1061	-3.50301	0.0117836	0.407605	UP-regulated
HTR3B	-1.51699	-3.90175	0.0339759	1	down-regulated		NEUROG3	1.65092	-3.89822	0.0228184	1	UP-regulated		ACKR1	1.05386	3.85523	0.0135022	0.452854	UP-regulated
MDGA2	-1.33676	-3.73412	0.034011	1	down-regulated		CT45A9	1.80369	-2.65862	0.0228245	1	UP-regulated		PI16	1.15674	2.3455	0.0136081	0.455629	UP-regulated
KRTAP9-7	-1.83187	-3.50508	0.0345894	1	down-regulated		PRKAG3	1.66469	-2.64642	0.0235867	1	UP-regulated		VGLL2	1.23908	-3.07001	0.0138098	0.458475	UP-regulated
NGB	-1.62158	0.984815	0.0347373	1	down-regulated		SBK3	1.08231	-2.397	0.023714	1	UP-regulated		S100A14	1.05116	1.01316	0.0148373	0.480544	UP-regulated
STPG2	-1.4565	3.01722	0.0354427	1	down-regulated		ABRA	1.28347	1.15593	0.0240314	1	UP-regulated		GSTA1	1.04122	1.25681	0.0175294	0.531671	UP-regulated
TSPY1	-2.22458	-3.94325	0.0359826	1	down-regulated		LINC01314	1.09711	1.48675	0.0240802	1	UP-regulated		KRTAP4-3	1.15431	-3.79658	0.0180608	0.541107	UP-regulated
BMPR2	-1.06181	8.80376	0.0359839	1	down-regulated		GPC3	1.02275	6.65587	0.024542	1	UP-regulated		SYT4	1.118	1.28292	0.0185679	0.552092	UP-regulated
LRTM1	-1.70771	-2.08249	0.0364416	1	down-regulated		SYNPO2L	1.85091	0.00981874	0.0246234	1	UP-regulated		OR6J1	1.10897	0.82805	0.0195324	0.567225	UP-regulated
CSMD2	-1.60438	-0.633408	0.0366693	1	down-regulated		CDKL3	1.28583	6.4246	0.0249111	1	UP-regulated		MT1M	1.05808	2.89715	0.0228925	0.62818	UP-regulated
KRT28	-1.93306	1.77305	0.038037	1	down-regulated		GOT2	1.18355	8.22734	0.0250968	1	UP-regulated		ATP1B4	1.05348	-2.17784	0.0236939	0.639671	UP-regulated
FOXRED1	-1.16071	7.99225	0.0384389	1	down-regulated		MYOM1	1.73878	2.4164	0.0255139	1	UP-regulated		C10orf71	1.07143	-1.23686	0.024546	0.651047	UP-regulated
GALP	-1.92055	-4.03604	0.0392338	1	down-regulated		SLN	1.95818	0.711745	0.0255499	1	UP-regulated		CXCL2	1.01691	2.07754	0.0258177	0.672081	UP-regulated
VWA3A	-1.03205	0.0655992	0.0402203	1	down-regulated		ZNF534	1.03078	-2.74162	0.0259591	1	UP-regulated		RNASE11	1.14802	-3.92674	0.026491	0.682378	UP-regulated
OPN1MW3	-1.87226	-3.73716	0.0426439	1	down-regulated		C19orf67	1.36954	2.29488	0.0270509	1	UP-regulated		SYNPO2L	1.01025	-0.0284734	0.0309877	0.747279	UP-regulated
STAC3	-1.14633	2.2244	0.0429717	1	down-regulated		LOR	1.58033	-3.35171	0.0271799	1	UP-regulated		MAGEA1	1.07199	-1.75959	0.031774	0.755122	UP-regulated
FSCB	-1.94416	-3.60247	0.043043	1	down-regulated		PBOV1	1.39476	-0.297967	0.0273332	1	UP-regulated		FAM47B	1.1394	-0.60892	0.0355192	0.802588	UP-regulated
ARL10	-1.32361	8.38767	0.0430576	1	down-regulated		RNF138	1.1355	5.8908	0.0277347	1	UP-regulated		APOA2	1.1626	-1.67098	0.0361484	0.809181	UP-regulated
ART1	-1.81745	5.33246	0.0434948	1	down-regulated		SULT1C4	1.09921	4.85945	0.0293466	1	UP-regulated		AC092647.5	-4.03208	-0.208136	2.29745e-09	1.18827e-06	down-regulated
AC008403.1	-1.89288	-3.63674	0.0436427	1	down-regulated		ACKR2	1.06935	1.55668	0.0294747	1	UP-regulated		EPYC	-4.13653	-0.175222	4.84933e-08	1.9856e-05	down-regulated
ASB17	-1.71681	-0.310527	0.0439345	1	down-regulated		CXorf49B	1.53743	-0.75576	0.0299157	1	UP-regulated		AL929554.1	-5.91869	-2.14209	8.16851e-08	3.08738e-05	down-regulated
C6	-1.2806	-2.38555	0.0444203	1	down-regulated		TRIM54	1.666	-0.69763	0.0303267	1	UP-regulated		DRGX	-5.87522	-0.496907	2.23682e-07	7.45126e-05	down-regulated
PKHD1L1	-1.21144	1.33467	0.0446018	1	down-regulated		GRIN3A	1.06634	6.6714	0.0308729	1	UP-regulated		ZNF684	-2.37229	2.60189	2.2975e-07	7.52586e-05	down-regulated
CFAP45	-1.04304	-0.685913	0.0466936	1	down-regulated		MYOM2	1.72187	1.77051	0.0309325	1	UP-regulated		CCNB3	-2.19729	2.87968	3.40016e-07	0.000106074	down-regulated
AC034102.2	-1.7816	1.33903	0.0468833	1	down-regulated		SCN4A	1.45877	-1.7348	0.0312628	1	UP-regulated		CALML5	-4.50674	-0.413897	3.73237e-07	0.000114619	down-regulated
RBFOX1	-1.71906	-0.81971	0.0473204	1	down-regulated		SLC30A8	1.48159	-2.88779	0.0312782	1	UP-regulated		IGSF10	-2.60126	3.50798	8.4583e-07	0.000248119	down-regulated
SLC22A31	-1.26717	4.77558	0.0473584	1	down-regulated		APH1B	1.24156	5.33576	0.0330219	1	UP-regulated		SYNJ2BP-COX16	-1.9245	-0.0321878	9.22876e-07	0.000266738	down-regulated
CBR3	-1.94531	2.60143	0.0476123	1	down-regulated		ENO3	1.42619	1.84904	0.033053	1	UP-regulated		TDO2	-3.81052	2.2077	9.7251e-07	0.00027701	down-regulated
ZIC5	-1.77304	-0.189932	0.0478345	1	down-regulated		C10orf71	1.7781	-1.21795	0.0334493	1	UP-regulated		ADGRG7	-4.02897	-1.06078	1.04419e-06	0.00029318	down-regulated
NPW	-1.54576	-1.66444	0.0478472	1	down-regulated		TNNT1	2.03915	3.66265	0.0339883	1	UP-regulated		RXFP1	-1.75034	1.02414	1.36128e-06	0.000366502	down-regulated
TMEM190	-1.18874	-3.26422	0.0488205	1	down-regulated		TRIM72	1.04966	0.169012	0.0340713	1	UP-regulated		FAM187A	-5.36624	1.21603	1.38983e-06	0.00036913	down-regulated
OR1A1	-1.9393	-4.01832	0.0488885	1	down-regulated		OR7C2	1.73264	-3.94256	0.0341183	1	UP-regulated		RS1	-1.83875	-1.50278	2.27544e-06	0.000588439	down-regulated
HCN1	-1.59091	-3.38418	0.0493859	1	down-regulated		ITGB7	1.04439	4.29825	0.034171	1	UP-regulated		SLCO1B7	-2.03254	-3.73602	2.45142e-06	0.000625717	down-regulated
CLDN24	-1.87213	-3.90289	0.0498101	1	down-regulated		PKHD1L1	1.10534	1.07932	0.0342055	1	UP-regulated		DBH	-3.00237	0.358474	2.57346e-06	0.000648445	down-regulated
SEMG2	8.694	4.5933	0.000626679	0.361114	UP-regulated		TMEM174	1.6369	-3.96903	0.034239	1	UP-regulated		TSPY2	-3.75146	-3.29876	5.31992e-06	0.00123009	down-regulated
TMEM31	2.45817	-3.08475	0.000694587	0.38881	UP-regulated		SLFN12L	1.18821	3.27626	0.0352869	1	UP-regulated		ARMT1	-2.20331	5.27911	5.69221e-06	0.00130087	down-regulated
OPRD1	4.86368	1.3702	0.000745914	0.399899	UP-regulated		FOSL1	1.00401	4.46748	0.0359365	1	UP-regulated		DKK4	-2.8999	0.0596016	6.87613e-06	0.00155337	down-regulated
MAK16	5.64742	10.4667	0.000755219	0.399899	UP-regulated		SPATA4	1.24095	3.67748	0.0361368	1	UP-regulated		AMBN	-4.55933	-2.12518	9.18537e-06	0.00198384	down-regulated
SEMG1	10.6178	5.43867	0.00148642	0.65082	UP-regulated		PDCD1LG2	1.3005	-0.9326	0.0367094	1	UP-regulated		LCE5A	-3.96401	-2.30719	9.44584e-06	0.00201792	down-regulated
ESM1	2.70213	1.18314	0.00170812	0.70149	UP-regulated		FAM9C	1.24712	-3.22871	0.0375398	1	UP-regulated		CACNA1I	-2.83974	-0.368529	1.07564e-05	0.00227318	down-regulated
PCDHA10	2.82459	1.16748	0.00176543	0.705883	UP-regulated		OPRK1	1.08219	6.99814	0.0377758	1	UP-regulated		TRIM55	-3.3635	5.77574	1.29674e-05	0.00267621	down-regulated
ACTR8	2.8581	7.26358	0.0021944	0.826782	UP-regulated		RYR1	1.12437	1.64413	0.0379685	1	UP-regulated		CST1	-3.51508	4.31057	1.3072e-05	0.00267621	down-regulated
TGM4	3.452	7.75666	0.0029447	1	UP-regulated		PAGE2B	1.30723	-3.85417	0.0380133	1	UP-regulated		NOTUM	-2.77127	0.113821	1.33055e-05	0.00269594	down-regulated
GC	7.90164	-0.376389	0.00323601	1	UP-regulated		AL049839.2	1.10916	3.24211	0.0380156	1	UP-regulated		ZNF645	-5.19981	-1.08816	1.37002e-05	0.00274758	down-regulated
CLDN2	4.98418	-0.661832	0.00367231	1	UP-regulated		NPW	1.3276	-1.6713	0.0383949	1	UP-regulated		LKAAEAR1	-2.24965	-0.0152384	1.47004e-05	0.0029184	down-regulated
C10orf55	2.14041	-2.36634	0.00381904	1	UP-regulated		C11orf16	1.04713	0.281267	0.0388661	1	UP-regulated		C2orf71	-2.81412	2.81006	2.38889e-05	0.00451454	down-regulated
FIGNL2	2.89264	-2.75983	0.00398678	1	UP-regulated		LY6H	1.48144	-1.39877	0.0390928	1	UP-regulated		ERVMER34-1	-1.3036	2.2819	2.42861e-05	0.0045459	down-regulated
CCDC122	3.46694	5.629	0.00436301	1	UP-regulated		SLC34A3	1.20488	4.81941	0.0394983	1	UP-regulated		UGT1A1	-2.87186	-2.2257	2.53403e-05	0.00468399	down-regulated
PCDHA6	4.45981	-1.19004	0.00487016	1	UP-regulated		SLC17A8	1.43088	-2.97267	0.039572	1	UP-regulated		STMN4	-2.16129	-0.726761	3.19591e-05	0.0057626	down-regulated
SOWAHA	2.3265	0.836865	0.00496122	1	UP-regulated		TTN	1.7747	3.80813	0.0398032	1	UP-regulated		NRM	-1.8093	3.91793	3.60632e-05	0.00644351	down-regulated
OR2T10	7.39771	-0.836684	0.00508019	1	UP-regulated		OR10G7	1.80542	-2.83429	0.0405823	1	UP-regulated		WFDC5	-2.75138	-0.219687	3.89287e-05	0.00689283	down-regulated
ORM1	6.58108	4.58857	0.00558858	1	UP-regulated		KRTAP21-1	1.66614	-3.87327	0.0409463	1	UP-regulated		PLA2G2A	-1.32593	9.52395	4.12773e-05	0.00724344	down-regulated
EVX2	2.31703	-0.392767	0.00560267	1	UP-regulated		SLX1B	1.16319	-1.53571	0.0413254	1	UP-regulated		CEACAM5	-2.53844	0.582127	5.12099e-05	0.00882877	down-regulated
RHCG	3.96673	0.219002	0.00588903	1	UP-regulated		SCGB1D4	1.50547	-4.01891	0.0431416	1	UP-regulated		LHFPL3	-2.20934	-1.88522	5.52059e-05	0.00943493	down-regulated
PNLDC1	1.76209	-2.22193	0.00594826	1	UP-regulated		MYH8	1.64115	-2.22821	0.0431844	1	UP-regulated		DYDC2	-1.70625	-2.39209	5.59697e-05	0.00948301	down-regulated
FCRL5	4.44744	-0.336193	0.00627933	1	UP-regulated		SMPX	1.09121	-0.200168	0.044693	1	UP-regulated		FGF3	-3.12374	-3.26034	5.81816e-05	0.00977352	down-regulated
MAGEA8	4.99614	-0.47251	0.00678299	1	UP-regulated		MYOD1	1.41618	-2.92613	0.0466976	1	UP-regulated		TEX101	-1.87093	0.251133	6.36708e-05	0.0104795	down-regulated
FOXA2	4.27319	-0.884352	0.00687597	1	UP-regulated		WBP2NL	1.13154	5.80318	0.0479645	1	UP-regulated		AZU1	-2.35647	-1.90432	6.56881e-05	0.0106697	down-regulated
POU2AF1	3.27534	1.20836	0.0074469	1	UP-regulated		ARHGDIG	1.51241	1.03509	0.0485792	1	UP-regulated		NWD2	-2.48512	-2.13165	6.69827e-05	0.0107908	down-regulated
CGA	4.52856	0.171926	0.00747226	1	UP-regulated		ZFP90	-1.32159	4.92645	0.000312273	0.149685	down-regulated		SLC6A15	-1.89129	3.88645	7.10874e-05	0.0111772	down-regulated
ITLN1	3.32509	-1.95993	0.00754233	1	UP-regulated		TMEM31	-2.78621	-2.78806	0.00053025	0.192982	down-regulated		TMEM190	-1.89694	-2.38096	7.47582e-05	0.0116611	down-regulated
INO80E	1.85753	6.84288	0.00796971	1	UP-regulated		SRSF12	-1.53651	2.76726	0.000764815	0.254761	down-regulated		RAPGEF2	-1.54285	5.42924	8.14184e-05	0.0121515	down-regulated
PATE1	6.73977	-0.0149032	0.00831189	1	UP-regulated		ZNF337	-2.10974	2.11594	0.000801524	0.262539	down-regulated		LUZP2	-2.42916	6.74605	8.52938e-05	0.0125102	down-regulated
KLK14	6.0026	3.70489	0.00839096	1	UP-regulated		PCDHA10	-2.73978	1.2197	0.000871376	0.276212	down-regulated		AC002310.5	-2.53344	4.31159	8.69569e-05	0.0126596	down-regulated
CBY3	2.73157	-0.361931	0.00889632	1	UP-regulated		UBAP2	-1.35356	5.95708	0.00118383	0.337185	down-regulated		C4BPB	-2.09945	-1.91992	9.4374e-05	0.0133441	down-regulated
IGLL5	4.33682	2.72085	0.00895997	1	UP-regulated		ABCB7	-1.11613	4.46886	0.00190634	0.480325	down-regulated		HIST2H4B	-2.40156	-3.15173	0.000104521	0.0145691	down-regulated
AC004691.2	1.96514	-3.53271	0.00905919	1	UP-regulated		ESM1	-2.3959	1.08221	0.00205361	0.506661	down-regulated		CST4	-2.22553	-1.1838	0.000117279	0.0159167	down-regulated
CR2	4.4839	-0.035046	0.00952572	1	UP-regulated		ZNF766	-2.1214	5.80993	0.00223498	0.520634	down-regulated		RNASE6	-1.68141	3.35235	0.000119949	0.0160619	down-regulated
SPINK1	5.02441	2.07773	0.00967171	1	UP-regulated		CCNB3	-3.31724	2.96145	0.0022943	0.520634	down-regulated		PPIAL4G	-2.29394	1.21637	0.000120134	0.0160619	down-regulated
NXPE4	3.67175	0.0209443	0.00978977	1	UP-regulated		ARHGEF3	-1.13929	6.1587	0.00241951	0.520634	down-regulated		SEZ6	-1.23497	-0.257502	0.000121448	0.0161279	down-regulated
TG	2.21205	2.85808	0.0104667	1	UP-regulated		IGHMBP2	-1.06755	4.20505	0.00245612	0.520634	down-regulated		GLRA3	-2.74098	-1.2116	0.000122459	0.0161531	down-regulated
ABCC12	3.27274	-2.57465	0.0104683	1	UP-regulated		ZSWIM6	-1.14637	4.61584	0.00247448	0.520634	down-regulated		IAPP	-2.31247	-1.50366	0.000125692	0.0164691	down-regulated
LHFPL4	3.27907	-1.60306	0.0104842	1	UP-regulated		C15orf62	-1.23174	0.772726	0.00249062	0.520634	down-regulated		MYEOV	-1.95521	-0.746262	0.000130682	0.0167871	down-regulated
PCDHA4	2.97664	-0.171923	0.0108682	1	UP-regulated		PLGRKT	-1.76114	5.79463	0.0024939	0.520634	down-regulated		DNAI2	-1.68347	-2.99927	0.000142385	0.0179912	down-regulated
GABRA1	3.99107	0.379582	0.0108986	1	UP-regulated		IRX5	-1.70542	4.33743	0.0025218	0.520634	down-regulated		LY6G6C	-2.29848	-1.46804	0.000142802	0.0179912	down-regulated
MMP13	3.71358	-2.02378	0.0111643	1	UP-regulated		MAK16	-4.19705	9.13761	0.00266573	0.526032	down-regulated		CDKL4	-1.14102	-3.4547	0.000164118	0.0202866	down-regulated
C5orf46	3.7265	-1.34652	0.0113525	1	UP-regulated		FADS1	-1.33357	4.5934	0.00272068	0.526032	down-regulated		BPIFC	-1.94915	-1.54433	0.000165645	0.0203474	down-regulated
GRM3	2.4763	-1.44261	0.0114624	1	UP-regulated		PAX6	-1.47197	2.32089	0.0027569	0.526032	down-regulated		FGF4	-3.21375	-2.99328	0.000186182	0.0223438	down-regulated
PCDHGB5	1.71705	1.82111	0.0115674	1	UP-regulated		ZNF684	-3.47301	2.61984	0.00280788	0.527883	down-regulated		PRR23B	-1.80867	-3.97704	0.000186445	0.0223438	down-regulated
CD79A	2.07758	1.99607	0.0117349	1	UP-regulated		RS1	-2.89039	-1.33899	0.0029009	0.527883	down-regulated		PIWIL1	-1.70432	-3.07952	0.000205606	0.0244908	down-regulated
ZFP90	1.16232	4.64187	0.0117649	1	UP-regulated		FIGNL2	-3.10179	-2.46227	0.00296591	0.530984	down-regulated		AGT	-1.75949	4.90554	0.000221613	0.0262385	down-regulated
CD247	4.1204	3.57803	0.0119579	1	UP-regulated		FRMD8	-1.27415	5.06734	0.00297197	0.530984	down-regulated		FGF22	-1.77326	1.16779	0.000298844	0.0337557	down-regulated
ZNF337	1.67843	1.46639	0.0125053	1	UP-regulated		TG	-3.25257	4.07953	0.00325075	0.565371	down-regulated		C6orf58	-1.24415	-0.562901	0.00030461	0.0338238	down-regulated
ETV4	3.38225	7.19921	0.0127221	1	UP-regulated		HNRNPUL2-BSCL2	-1.23552	-0.34906	0.00332798	0.573726	down-regulated		ABCA12	-1.86433	-1.33694	0.000308793	0.0339751	down-regulated
LRTM2	3.15259	-3.12135	0.012737	1	UP-regulated		TRAIP	-1.80632	3.53696	0.00356637	0.595666	down-regulated		CYP3A4	-1.40766	-2.36617	0.000329657	0.0357403	down-regulated
PRB2	4.39585	-3.09154	0.0129076	1	UP-regulated		PNLDC1	-1.9588	-1.95305	0.00401546	0.631327	down-regulated		DDX4	-1.98303	-2.49637	0.000336409	0.0359336	down-regulated
TCL1A	4.29467	-1.74984	0.0130043	1	UP-regulated		SV2B	-1.45384	1.58036	0.00419984	0.652242	down-regulated		SCEL	-1.99948	-2.37027	0.000353109	0.0375136	down-regulated
AC097372.1	2.55562	-2.99557	0.0134958	1	UP-regulated		MT-ATP8	-1.16791	8.32341	0.00451107	0.660383	down-regulated		FEZF2	-2.25613	-2.77319	0.000394001	0.0414102	down-regulated
GABRG2	4.04005	-0.082414	0.0136288	1	UP-regulated		MCIDAS	-2.66266	-1.55298	0.00472908	0.676836	down-regulated		MT4	-2.42888	-3.64291	0.000396978	0.0415011	down-regulated
CALHM3	4.5426	-2.65647	0.0136465	1	UP-regulated		PCDHA6	-4.54126	-0.851118	0.00514394	0.70695	down-regulated		UBL4B	-1.61677	-1.68886	0.000414622	0.0431163	down-regulated
AL136295.1	4.65049	2.06991	0.013681	1	UP-regulated		PCDHA4	-3.10069	0.243592	0.00522008	0.712432	down-regulated		OTOG	-1.98354	-3.60986	0.00044762	0.0463028	down-regulated
FUT3	3.26395	-1.7589	0.0139811	1	UP-regulated		TGM4	-3.18573	7.58693	0.00526636	0.713791	down-regulated		NETO1	-2.59947	0.316972	0.00045167	0.0464611	down-regulated
AHSG	4.35607	-3.11204	0.0139817	1	UP-regulated		RAP1GAP	-1.19333	6.66096	0.00548901	0.717156	down-regulated		ANKRD60	-2.75562	-2.78059	0.000453879	0.0464611	down-regulated
CPS1	3.69366	1.1199	0.0140673	1	UP-regulated		RXFP1	-2.48601	1.13076	0.00578021	0.728944	down-regulated		CACNG3	-2.26236	-3.65593	0.000500328	0.0504279	down-regulated
CAPN12	4.22898	0.696205	0.0140686	1	UP-regulated		PGLYRP4	-1.97056	-3.21432	0.00593704	0.728944	down-regulated		OR4A5	-2.02297	-3.89052	0.000508303	0.0509068	down-regulated
PGLYRP4	2.19568	-3.2605	0.0148071	1	UP-regulated		C10orf55	-1.7927	-2.49819	0.00607273	0.72903	down-regulated		AMZ1	-1.12705	0.375648	0.000512849	0.0509068	down-regulated
TUNAR	4.24409	-0.630648	0.0157892	1	UP-regulated		SYNJ2BP-COX16	-2.59939	0.00272284	0.00621582	0.740361	down-regulated		TRPC5	-1.76503	-3.13863	0.000534156	0.0527553	down-regulated
MT1HL1	2.91929	-3.62669	0.0164029	1	UP-regulated		UGT1A1	-5.76889	-2.02675	0.00625529	0.740574	down-regulated		GRID2	-2.08837	-1.824	0.000548012	0.0535852	down-regulated
MCIDAS	2.28739	-2.02515	0.0164711	1	UP-regulated		LRRC3	-1.05692	1.62873	0.00631766	0.743478	down-regulated		CSMD3	-1.31912	0.996133	0.000577019	0.0559817	down-regulated
EME1	2.25928	0.412947	0.0164761	1	UP-regulated		CDC20	-1.18557	2.81538	0.00648041	0.747754	down-regulated		KRT78	-2.06913	-3.22209	0.000582223	0.0559817	down-regulated
OTOP3	3.66596	-3.16414	0.0169248	1	UP-regulated		GC	-7.3777	-0.652919	0.00649918	0.747754	down-regulated		HAO2	-1.60179	-3.13828	0.000583914	0.0559817	down-regulated
ZFR2	1.95472	-2.27179	0.0169344	1	UP-regulated		NRM	-3.00162	3.95172	0.00650618	0.747754	down-regulated		ABCB5	-1.6096	-0.600862	0.000599648	0.0569347	down-regulated
C15orf62	1.12772	0.572065	0.0170215	1	UP-regulated		PCDHGB5	-1.64407	1.96478	0.00668176	0.754832	down-regulated		SPRR1B	-1.67237	-3.76969	0.000609629	0.0570894	down-regulated
PVALB	2.83792	-2.95413	0.0171273	1	UP-regulated		PLBD2	-1.71489	7.7099	0.00693361	0.764751	down-regulated		GLDC	-1.58027	1.3882	0.000611821	0.0570894	down-regulated
KRT4	2.89024	1.01341	0.0174794	1	UP-regulated		UGT2B17	-4.98338	-2.04149	0.00695307	0.764751	down-regulated		AC099811.2	-2.47773	-1.40994	0.000612715	0.0570894	down-regulated
CT45A3	5.55346	-1.38118	0.0177419	1	UP-regulated		C2orf71	-4.89967	2.80838	0.00701257	0.765656	down-regulated		REG4	-1.80865	3.16136	0.000621345	0.0570894	down-regulated
UGT2B17	3.94334	-2.9175	0.0178624	1	UP-regulated		SOWAHA	-1.81091	0.609835	0.00723525	0.781288	down-regulated		TFE3	-1.05308	6.48808	0.000629039	0.0570894	down-regulated
GIF	2.30663	-3.61373	0.0183747	1	UP-regulated		CGA	-5.27828	1.18655	0.00745846	0.790422	down-regulated		UGT1A10	-2.5393	-2.60318	0.000630325	0.0570894	down-regulated
PLCXD2	2.7262	-0.607674	0.0186831	1	UP-regulated		ORM1	-7.79973	6.15463	0.00748071	0.790422	down-regulated		PPP1R2P3	-1.11329	-1.99626	0.000672246	0.0597842	down-regulated
ITLN2	3.58888	-0.131819	0.0195968	1	UP-regulated		IL16	-1.375	3.42426	0.00753308	0.791698	down-regulated		UGT1A8	-2.03982	-2.71459	0.000703965	0.0620437	down-regulated
GABRP	3.06442	3.02424	0.0196214	1	UP-regulated		PCDHA8	-3.54599	-2.60881	0.00770992	0.803633	down-regulated		NOL4L	-1.00772	5.27206	0.000740681	0.0649881	down-regulated
CD19	3.66479	-0.332504	0.020247	1	UP-regulated		INO80E	-1.62162	6.74285	0.00786695	0.809472	down-regulated		ECEL1	-1.95873	-0.204217	0.000775236	0.0671211	down-regulated
GJA3	3.33062	-0.606637	0.0205081	1	UP-regulated		SPINK1	-5.86301	3.23864	0.00794137	0.810615	down-regulated		HMP19	-1.67807	-2.06584	0.000816318	0.0697561	down-regulated
PCDHA8	2.87591	-3.14056	0.0207016	1	UP-regulated		SSBP2	-1.58402	6.71278	0.00814046	0.822223	down-regulated		FIBCD1	-1.09617	-1.10899	0.000853962	0.0714203	down-regulated
CARTPT	4.25955	1.46604	0.0215443	1	UP-regulated		PUS1	-1.56169	5.55976	0.00815822	0.822223	down-regulated		KRTAP13-2	-1.29214	-0.592858	0.000864315	0.0716762	down-regulated
SLC16A14	2.11304	7.13108	0.0219164	1	UP-regulated		NECAB2	-2.29526	0.450693	0.00887365	0.853086	down-regulated		AC008403.1	-2.26433	-2.95617	0.000884789	0.0724713	down-regulated
ZNF766	1.59447	5.10628	0.0220279	1	UP-regulated		DNAH11	-1.2014	0.803455	0.00889852	0.853086	down-regulated		AC068775.1	-1.1441	-0.936404	0.000908749	0.0738039	down-regulated
ARMS2	2.1358	-3.42199	0.0220407	1	UP-regulated		SLC3A1	-2.35392	0.274828	0.00926985	0.86713	down-regulated		FAM83A	-1.22213	0.546762	0.000958195	0.0774994	down-regulated
KRT1	2.58727	-2.63665	0.0221268	1	UP-regulated		LRTM2	-3.22333	-2.95095	0.00930901	0.86713	down-regulated		HIST1H3C	-1.27462	-3.28472	0.00100591	0.0806948	down-regulated
CCDC144NL	3.25504	-1.80176	0.0222732	1	UP-regulated		PPP2R5A	-1.12517	6.9044	0.00930974	0.86713	down-regulated		VWA3A	-1.03047	0.713441	0.00102859	0.0821781	down-regulated
PAX6	1.22525	1.95947	0.0223546	1	UP-regulated		CPS1	-4.27985	2.02117	0.01008	0.90873	down-regulated		SLC38A11	-1.20267	4.12071	0.00103341	0.0822296	down-regulated
KRT24	2.75776	-3.2079	0.0225287	1	UP-regulated		OPRD1	-1.77958	-1.25929	0.010458	0.924751	down-regulated		AC008982.1	-1.33144	-3.88619	0.00109004	0.0856943	down-regulated
RSPO4	2.66197	-2.09952	0.0234248	1	UP-regulated		AGT	-3.21716	5.09562	0.0105616	0.924751	down-regulated		IRGM	-1.38425	-3.28801	0.00110233	0.0863157	down-regulated
CLEC3A	2.15988	1.45764	0.0237166	1	UP-regulated		FOXB2	-3.24801	-1.10825	0.0106825	0.926315	down-regulated		USH1C	-1.23669	-2.05753	0.00114798	0.0889238	down-regulated
APOA2	6.01183	-1.04258	0.0240039	1	UP-regulated		NKX6-3	-3.37244	-3.1452	0.0107057	0.926315	down-regulated		C17orf78	-1.30475	-2.04163	0.00115142	0.0889238	down-regulated
CXCL17	1.9883	0.966458	0.024082	1	UP-regulated		GLRA3	-5.52623	-1.01422	0.0108282	0.926315	down-regulated		MUCL1	-1.88101	-0.139984	0.00117821	0.0899452	down-regulated
LGALS9C	2.4285	-3.05507	0.0242067	1	UP-regulated		UCP1	-2.82222	-3.70734	0.0108491	0.926315	down-regulated		HIST1H3I	-1.90149	-3.63438	0.00120692	0.0909183	down-regulated
ZP2	3.22638	-3.64	0.0242332	1	UP-regulated		GRM7	-4.19045	0.667751	0.0110043	0.926315	down-regulated		C1orf158	-1.55006	-3.12714	0.00120737	0.0909183	down-regulated
ANXA8	3.3068	-0.185193	0.0243698	1	UP-regulated		RPP25	-1.00635	2.59967	0.0111615	0.926315	down-regulated		SCGB2A2	-2.12083	-3.43326	0.00122299	0.0913938	down-regulated
ZNF843	2.04721	2.97477	0.0247109	1	UP-regulated		ZFR2	-2.957	-1.29699	0.0111706	0.926315	down-regulated		CRYGD	-1.56447	-3.7496	0.00124524	0.0923545	down-regulated
SERPINA4	3.66653	-1.31308	0.0248092	1	UP-regulated		PRDM12	-1.62344	-1.65809	0.0116642	0.963179	down-regulated		OR5J2	-2.2924	-3.86852	0.00128292	0.0947911	down-regulated
SEMA3A	1.72247	2.09694	0.0248844	1	UP-regulated		ATP12A	-4.7132	1.55639	0.0117407	0.963588	down-regulated		PCBD2	-1.04904	4.86964	0.00131566	0.0964854	down-regulated
PCDHA11	2.93218	-0.806511	0.0251006	1	UP-regulated		PPP1R42	-1.93266	0.283789	0.0118066	0.963588	down-regulated		CPLX2	-1.48318	-0.0458041	0.00134769	0.098108	down-regulated
PDK3	1.87082	4.1611	0.0253012	1	UP-regulated		GP2	-2.29375	5.78014	0.01183	0.963588	down-regulated		CEMP1	-2.68804	-3.35411	0.00134778	0.098108	down-regulated
TNFRSF17	3.01577	-1.71073	0.0253303	1	UP-regulated		FGF22	-3.14945	1.11364	0.0120965	0.971001	down-regulated		CLRN3	-1.47738	-3.56944	0.00135561	0.0983146	down-regulated
TAT	2.10962	-2.90984	0.0253588	1	UP-regulated		AC092647.5	-4.11937	-0.253298	0.0122036	0.971001	down-regulated		DPEP1	-1.31296	0.142702	0.00136701	0.0984819	down-regulated
PPP1R42	1.8249	0.101884	0.025423	1	UP-regulated		MYEOV	-3.42941	-0.618988	0.0130644	1	down-regulated		KRT20	-1.07512	-1.08343	0.00143338	0.101693	down-regulated
GRM7	3.01753	-0.701738	0.0255567	1	UP-regulated		SYCE1	-3.31401	-1.11839	0.0131312	1	down-regulated		CST2	-2.27273	3.00174	0.00143841	0.101693	down-regulated
KRT5	1.75081	6.39942	0.0255893	1	UP-regulated		MT1HL1	-3.20352	-3.50016	0.0131525	1	down-regulated		COLEC10	-1.57756	-3.14868	0.00147454	0.103632	down-regulated
RHBG	1.9685	-0.822727	0.0260035	1	UP-regulated		OMP	-2.70849	-3.01013	0.013594	1	down-regulated		HSPA6	-1.16532	1.63765	0.00147638	0.103632	down-regulated
PRSS1	4.036	-3.27427	0.0262024	1	UP-regulated		TDO2	-5.27947	2.47654	0.0136813	1	down-regulated		ERICH3	-1.59027	-2.37921	0.00148374	0.103777	down-regulated
SYT16	2.38836	1.89799	0.0262991	1	UP-regulated		SERPIND1	-3.18534	-2.19685	0.0138619	1	down-regulated		H2BFWT	-2.63769	-3.39295	0.00150745	0.105062	down-regulated
GLRA3	2.76099	-3.21652	0.0264611	1	UP-regulated		SEMG2	-3.86978	0.0648548	0.0140934	1	down-regulated		ZDHHC22	-1.59884	-2.55698	0.00179836	0.118873	down-regulated
KCNK5	1.06976	1.69251	0.0272791	1	UP-regulated		FOXQ1	-1.007	1.77077	0.0144734	1	down-regulated		TMEM207	-1.72423	-3.87842	0.00187434	0.122795	down-regulated
AOC1	4.35374	3.36791	0.0273362	1	UP-regulated		AC004691.2	-2.09415	-3.36477	0.0145067	1	down-regulated		C6orf223	-1.28449	-2.59196	0.00191821	0.12476	down-regulated
IRF4	2.63414	0.545925	0.0277854	1	UP-regulated		PLA2G2A	-1.93694	9.71766	0.0145911	1	down-regulated		KRTAP20-1	-2.58788	-3.64459	0.00193737	0.125254	down-regulated
DNAH11	1.16039	0.63564	0.0278923	1	UP-regulated		MTFMT	-1.11675	5.29812	0.0146037	1	down-regulated		SLC36A3	-1.50541	-3.43883	0.00196981	0.126519	down-regulated
CIDEC	2.44942	-1.09933	0.0283462	1	UP-regulated		GCSAM	-1.6311	0.548277	0.0147394	1	down-regulated		IDI2	-1.83589	-2.7596	0.0020152	0.129012	down-regulated
UNC5CL	1.43331	0.485636	0.0283651	1	UP-regulated		PCDHA11	-3.53134	-0.0524709	0.0147785	1	down-regulated		POU5F2	-1.30586	-3.03039	0.00203558	0.129894	down-regulated
GLYATL3	5.43746	-0.0455104	0.0288562	1	UP-regulated		C6orf58	-1.98826	-0.5793	0.0151032	1	down-regulated		FOLR3	-1.39282	-3.13056	0.00207796	0.131319	down-regulated
SSBP2	1.46684	6.52806	0.029225	1	UP-regulated		CBY3	-2.32401	-0.613187	0.0152674	1	down-regulated		GPHA2	-1.3451	-2.03675	0.00211587	0.133286	down-regulated
CXCL1	2.6537	2.01437	0.0292927	1	UP-regulated		SEMG1	-5.17768	0.384013	0.0159124	1	down-regulated		NME5	-1.04832	2.45586	0.00215274	0.134745	down-regulated
HNRNPUL2-BSCL2	1.09836	-0.597817	0.0294637	1	UP-regulated		TFE3	-1.78098	6.49522	0.0160334	1	down-regulated		SPATA4	-1.22768	3.65495	0.00216735	0.135229	down-regulated
CNR2	2.26221	-1.79488	0.0295741	1	UP-regulated		PLCXD2	-2.50576	-0.551233	0.0160773	1	down-regulated		UNC5A	-1.09805	2.91789	0.002241	0.138942	down-regulated
TNFAIP8L2	1.5203	0.582139	0.0296754	1	UP-regulated		ABCC12	-4.8034	-1.20143	0.016436	1	down-regulated		GPR83	-1.16796	-2.23068	0.00225386	0.1393	down-regulated
FOXQ1	1.23452	1.91313	0.0297018	1	UP-regulated		TAT	-2.23594	-2.68198	0.0169593	1	down-regulated		CAMKV	-1.51963	-2.67762	0.00227253	0.13997	down-regulated
SMCO2	2.18803	-3.53905	0.0302574	1	UP-regulated		FCRL5	-2.83376	-1.50479	0.0171536	1	down-regulated		FOXB2	-1.45368	-1.2853	0.00227895	0.13997	down-regulated
SCGB1A1	2.30918	2.11667	0.0305765	1	UP-regulated		PCBD2	-1.88702	4.83355	0.0172264	1	down-regulated		TAS2R43	-1.45409	-2.9419	0.0023144	0.140828	down-regulated
FAM174A	1.509	7.30069	0.0307088	1	UP-regulated		MT-ND4L	-1.07235	8.65913	0.0173837	1	down-regulated		RP1	-1.11254	-3.72957	0.00232228	0.140871	down-regulated
VTCN1	2.15886	0.918928	0.0308518	1	UP-regulated		PRB2	-4.51664	-2.90492	0.0174437	1	down-regulated		VIP	-1.71692	-1.06486	0.00236233	0.142859	down-regulated
UGT1A8	2.39963	-3.69278	0.0310064	1	UP-regulated		TCL1A	-3.28496	-2.29061	0.0176829	1	down-regulated		ATP12A	-1.90574	1.31638	0.00252877	0.150153	down-regulated
FCER2	3.14508	-1.93195	0.0311778	1	UP-regulated		FOXA2	-3.17424	-1.55945	0.0180074	1	down-regulated		FFAR4	-1.39918	-1.35151	0.00254247	0.150511	down-regulated
HPR	3.1927	-2.32789	0.0319085	1	UP-regulated		C4orf19	-2.18546	0.260806	0.01811	1	down-regulated		FAM216B	-1.80101	-1.74869	0.00257594	0.151127	down-regulated
VTN	2.41254	-0.150528	0.0319636	1	UP-regulated		MMP13	-3.11382	-2.29744	0.018138	1	down-regulated		SSX4	-2.43962	-2.8587	0.0026098	0.1525	down-regulated
ABCB7	1.06164	4.29088	0.0328316	1	UP-regulated		ITLN1	-2.60266	-2.29944	0.0182544	1	down-regulated		TNP2	-3.01699	-0.0987103	0.00261486	0.1525	down-regulated
KRT16	2.47693	0.675994	0.0330519	1	UP-regulated		SERPINA4	-4.42177	-0.359891	0.0183066	1	down-regulated		CATSPERD	-1.30639	-3.28407	0.00274803	0.159792	down-regulated
C1orf189	2.40771	1.98584	0.0331324	1	UP-regulated		PRAME	-2.91087	0.108129	0.0184037	1	down-regulated		PRAMEF6	-2.47751	-3.59627	0.00276879	0.16027	down-regulated
HTR1D	1.97687	-2.66428	0.0332904	1	UP-regulated		AQP10	-2.24249	-3.1445	0.0187402	1	down-regulated		FAM163B	-1.26382	-2.56284	0.00278595	0.16027	down-regulated
SV2B	1.13687	1.13589	0.0333056	1	UP-regulated		SDK1	-1.34315	5.62183	0.0188255	1	down-regulated		MAGEC2	-2.62895	-1.53122	0.00291392	0.166483	down-regulated
FUT7	1.96448	-1.39772	0.0334211	1	UP-regulated		GJA3	-3.32391	-0.320938	0.0189484	1	down-regulated		PFN3	-2.23188	-3.36548	0.00298903	0.169298	down-regulated
GJB4	1.49508	-1.00306	0.0339037	1	UP-regulated		ART4	-3.60423	0.434977	0.0190387	1	down-regulated		ASIC5	-1.58512	-3.69907	0.00301251	0.170138	down-regulated
ASCL2	2.99648	-0.274492	0.0339734	1	UP-regulated		ZNF680	-1.42197	4.03286	0.0192589	1	down-regulated		FTHL17	-2.3251	-3.67378	0.00314488	0.17681	down-regulated
NMU	2.18477	-2.75586	0.0342844	1	UP-regulated		ZP2	-2.86569	-3.72461	0.0193951	1	down-regulated		AC010547.5	-1.25719	-3.15221	0.00318053	0.177083	down-regulated
C2orf54	2.08072	0.0780419	0.0344258	1	UP-regulated		SLC44A5	-3.70907	2.31535	0.0195464	1	down-regulated		PRKCG	-1.18736	-2.69556	0.0033203	0.183307	down-regulated
PLGRKT	1.16702	5.13544	0.034623	1	UP-regulated		CTCFL	-2.03371	-2.18979	0.0199432	1	down-regulated		OBP2B	-1.71497	-1.9992	0.0033607	0.185017	down-regulated
CLDN9	2.33565	-2.16985	0.0346661	1	UP-regulated		PDK3	-1.9266	4.34332	0.0200728	1	down-regulated		PCDHA5	-1.0075	-0.527376	0.0033863	0.185906	down-regulated
GFAP	3.43097	-0.086992	0.0348161	1	UP-regulated		NUF2	-1.0447	0.48088	0.0203894	1	down-regulated		BARHL1	-1.84125	-3.16275	0.00342421	0.187386	down-regulated
PLBD2	1.52915	7.36713	0.0351586	1	UP-regulated		HTR1D	-2.15013	-2.36986	0.0205637	1	down-regulated		ANKRD66	-1.24301	-1.74696	0.00343234	0.187386	down-regulated
XCR1	2.06419	0.423028	0.0354545	1	UP-regulated		STMN4	-3.238	-0.608738	0.0205992	1	down-regulated		GHRHR	-1.50984	-0.704519	0.00357328	0.193456	down-regulated
FADS1	1.20931	4.32406	0.0355049	1	UP-regulated		DLGAP1	-1.04144	4.34255	0.0206126	1	down-regulated		IFNK	-1.78251	-3.63637	0.00357768	0.193456	down-regulated
MAGEC2	3.87744	-3.34498	0.0358933	1	UP-regulated		PCDHA12	-3.29304	-1.13147	0.0206351	1	down-regulated		NKX1-2	-2.10373	3.7948	0.0036624	0.195342	down-regulated
IRX5	1.18488	3.79051	0.0362739	1	UP-regulated		AL353588.1	-2.28491	0.717177	0.0208215	1	down-regulated		SNTN	-1.51542	-1.66567	0.00367984	0.195469	down-regulated
SOSTDC1	2.7073	-0.445298	0.0364728	1	UP-regulated		PTX4	-2.2826	-1.84395	0.0212614	1	down-regulated		OR6K6	-2.38216	-3.66115	0.00388059	0.203928	down-regulated
SLC44A5	2.76413	1.07052	0.0365626	1	UP-regulated		TRIM55	-4.69524	5.78202	0.0214445	1	down-regulated		MAEL	-1.06542	-0.670699	0.00397624	0.207096	down-regulated
SYCE1	2.71788	-1.80729	0.0368409	1	UP-regulated		KHDC1	-1.15426	0.494503	0.0214576	1	down-regulated		BOD1L2	-2.08108	-2.55535	0.00409667	0.210775	down-regulated
C4orf19	1.80128	-0.300613	0.0368649	1	UP-regulated		RHBG	-1.72159	-0.887009	0.0215369	1	down-regulated		ZAN	-1.25898	-3.38093	0.00413479	0.211628	down-regulated
GPR87	1.22204	1.37238	0.037419	1	UP-regulated		RAPGEF2	-2.19115	5.46937	0.0217798	1	down-regulated		UTS2B	-1.40767	-0.490725	0.00425862	0.215719	down-regulated
MIA2	2.48257	-2.9083	0.037438	1	UP-regulated		UBL4B	-2.64087	-1.69087	0.0217931	1	down-regulated		WDR38	-1.4568	-1.96782	0.00437007	0.219666	down-regulated
FGG	3.69377	-1.96763	0.0375487	1	UP-regulated		ANKRD34B	-3.49779	2.44859	0.0219015	1	down-regulated		AKAP14	-1.04951	-2.58368	0.00452308	0.224487	down-regulated
DUOXA1	1.33713	1.89126	0.0377271	1	UP-regulated		FAM111B	-1.20825	2.01376	0.0226505	1	down-regulated		AC010542.3	-1.50611	-3.52081	0.00478304	0.234428	down-regulated
PRRX1	1.10563	5.38174	0.0378612	1	UP-regulated		OR7D2	-2.53914	-2.50596	0.0229706	1	down-regulated		OR56B4	-1.17723	-3.14488	0.00484341	0.235625	down-regulated
TRAIP	1.36038	3.00622	0.03799	1	UP-regulated		MAGEC2	-6.60907	-1.332	0.0231722	1	down-regulated		COL2A1	-1.20315	5.1944	0.00495001	0.240216	down-regulated
AQP10	2.02113	-3.36157	0.0379965	1	UP-regulated		LHFPL4	-3.2219	-1.41843	0.0231766	1	down-regulated		OR4N4	-2.30285	-3.75112	0.00500938	0.242498	down-regulated
MS4A1	3.76873	1.33997	0.0382891	1	UP-regulated		HNRNPUL1	-1.04848	7.29474	0.0232206	1	down-regulated		DNAH8	-1.68353	3.94443	0.00528231	0.2526	down-regulated
PROC	1.61483	-0.766111	0.0389355	1	UP-regulated		CBX2	-1.90962	6.81408	0.02332	1	down-regulated		PRSS56	-2.27954	-1.13468	0.00536817	0.254845	down-regulated
PRSS50	1.77519	-0.212315	0.0395491	1	UP-regulated		CR2	-3.72656	-0.510965	0.0238006	1	down-regulated		CA6	-1.50126	-2.51858	0.00548271	0.25841	down-regulated
ATP12A	2.68409	-0.632844	0.0396142	1	UP-regulated		FAM174A	-1.41531	7.26244	0.024533	1	down-regulated		OR51G2	-1.72842	-3.30344	0.00555331	0.260403	down-regulated
TMPRSS11A	2.7833	-2.85084	0.0398462	1	UP-regulated		ACTR8	-1.48184	6.04583	0.024875	1	down-regulated		CYP2B6	-1.3227	-3.53089	0.00562464	0.261339	down-regulated
ABCC11	3.71658	2.38849	0.039859	1	UP-regulated		NMU	-2.2605	-2.56354	0.0253366	1	down-regulated		UGT2B11	-1.19021	-2.29685	0.0057421	0.265542	down-regulated
PNMA6A	3.04728	-0.284455	0.0400391	1	UP-regulated		AC234771.5	-2.70996	-2.46326	0.0255427	1	down-regulated		DHRS2	-1.55844	0.390104	0.00579672	0.266126	down-regulated
OR5M11	4.53953	-2.18146	0.0402401	1	UP-regulated		CNTNAP2	-1.22351	5.96335	0.025668	1	down-regulated		CCDC185	-1.37819	-3.29973	0.00580782	0.266126	down-regulated
TCERG1L	3.08842	0.00775336	0.0407925	1	UP-regulated		GIF	-3.26425	-3.20499	0.0259765	1	down-regulated		CHGB	-1.82005	2.95942	0.00582726	0.266126	down-regulated
LINC00694	2.00537	-2.94192	0.0412676	1	UP-regulated		TNFAIP8L2	-1.46598	0.729563	0.0260313	1	down-regulated		PPY	-1.71024	-3.55672	0.00583597	0.266126	down-regulated
SYT4	3.93325	1.96174	0.0413693	1	UP-regulated		AARD	-1.89138	-1.38353	0.0263188	1	down-regulated		FAM156B	-1.05549	-3.90148	0.00589699	0.268286	down-regulated
ZSWIM6	1.04151	4.38232	0.0416581	1	UP-regulated		EME1	-1.57936	-0.0157997	0.0267184	1	down-regulated		SMR3A	-1.28934	-4.08908	0.00596133	0.269342	down-regulated
HNF1A	2.66809	-1.33331	0.0416748	1	UP-regulated		OLIG1	-2.91823	-1.73541	0.0270037	1	down-regulated		GRP	-1.51715	-0.515083	0.00597737	0.269448	down-regulated
OR14I1	2.72851	-2.70995	0.0417548	1	UP-regulated		CCDC141	-1.50676	1.19803	0.027045	1	down-regulated		TNFRSF13B	-1.46716	2.34483	0.00607047	0.269939	down-regulated
LRRC10	5.6741	-0.493944	0.041765	1	UP-regulated		XCR1	-1.9529	0.580578	0.0270901	1	down-regulated		AL365214.3	-1.91195	-3.79286	0.0060993	0.26999	down-regulated
OR7D2	2.50291	-2.67023	0.0419303	1	UP-regulated		PRSS2	-3.79758	-2.62737	0.0271572	1	down-regulated		PHOX2B	-1.79046	-3.71539	0.00615372	0.271787	down-regulated
AC243756.1	2.18283	-3.00602	0.0422344	1	UP-regulated		KRT1	-2.58337	-2.47443	0.0274351	1	down-regulated		APH1B	-1.03536	5.20896	0.00623623	0.273587	down-regulated
SCUBE2	3.202	6.06661	0.0423123	1	UP-regulated		RNASE6	-2.41809	3.48755	0.0274735	1	down-regulated		CYP11B1	-1.90379	-3.40726	0.00628989	0.274105	down-regulated
PRH2	2.67778	-2.62338	0.0426013	1	UP-regulated		C2orf54	-2.41848	0.644516	0.0275506	1	down-regulated		PRR26	-1.28564	0.872199	0.00638498	0.277021	down-regulated
DLGAP3	1.3477	-0.858032	0.0431563	1	UP-regulated		LPXN	-1.35176	3.23	0.0275985	1	down-regulated		CHRM2	-1.69888	-2.08067	0.00659192	0.282767	down-regulated
PGLYRP1	1.62778	-3.48034	0.0432345	1	UP-regulated		HSPA6	-2.05316	1.81561	0.0276155	1	down-regulated		POU6F2	-1.19917	-2.87236	0.00665397	0.283239	down-regulated
KRT81	2.84508	-0.983907	0.0439008	1	UP-regulated		PGLYRP1	-1.74939	-3.2907	0.0276496	1	down-regulated		WFDC12	-1.48312	-0.835338	0.00665801	0.283239	down-regulated
SPINK2	3.17518	-0.616659	0.0439167	1	UP-regulated		EPYC	-4.1758	-0.0916689	0.0278924	1	down-regulated		CDK15	-1.05811	-0.808918	0.00691702	0.291732	down-regulated
PAEP	3.92453	-2.42536	0.0439611	1	UP-regulated		UGT1A8	-4.50405	-2.53067	0.0278939	1	down-regulated		OR7G3	-2.31362	2.26289	0.00695455	0.292687	down-regulated
SRSF12	1.13152	2.28361	0.0439724	1	UP-regulated		GRAMD2	-1.22038	1.58421	0.0280099	1	down-regulated		AC005670.2	-2.22778	-3.56345	0.00699081	0.292958	down-regulated
SPINT3	2.86081	-3.73366	0.0446557	1	UP-regulated		NUP62CL	-1.4393	0.251608	0.0281983	1	down-regulated		OPRM1	-1.11826	-4.12104	0.00711996	0.296474	down-regulated
MYH11	1.48715	11.1997	0.0448527	1	UP-regulated		CNMD	-2.33795	-1.40728	0.0283301	1	down-regulated		TSPYL6	-1.29851	-3.73908	0.0078755	0.321131	down-regulated
ANKRD30A	2.6062	-0.77086	0.0453435	1	UP-regulated		FUT3	-2.64334	-2.02633	0.0284501	1	down-regulated		PGC	-1.14897	5.51369	0.00799345	0.324593	down-regulated
AARD	1.71447	-1.6928	0.0454149	1	UP-regulated		GRID2	-3.9355	-1.63433	0.0291094	1	down-regulated		C6	-1.09471	-1.86799	0.00807783	0.327344	down-regulated
FRMD8	1.18804	4.82656	0.0455428	1	UP-regulated		CYP1A1	-2.89457	-1.41312	0.0295766	1	down-regulated		TEX15	-1.08269	-2.96647	0.00822842	0.330255	down-regulated
TMPRSS6	2.0969	-2.23464	0.0456464	1	UP-regulated		ASCL2	-3.33818	0.346275	0.0300727	1	down-regulated		C12orf40	-1.72315	-3.43354	0.00823369	0.330255	down-regulated
IL22RA2	2.34847	-1.57741	0.0457689	1	UP-regulated		AC002310.5	-3.64373	4.30762	0.0301548	1	down-regulated		CHRM3	-1.56573	3.27039	0.00825343	0.330373	down-regulated
ZSCAN4	2.00492	-3.12101	0.0458785	1	UP-regulated		GRP	-3.33402	-0.288601	0.0303204	1	down-regulated		SLC35G3	-1.54433	-3.56968	0.00849797	0.334708	down-regulated
CRABP2	1.57484	3.28094	0.0459871	1	UP-regulated		AATK-AS1	-2.85041	-2.51893	0.0303331	1	down-regulated		KLB	-1.00725	0.791074	0.00870484	0.339454	down-regulated
EIF5AL1	1.73242	0.586282	0.0463091	1	UP-regulated		LMLN	-1.00128	2.86298	0.0306223	1	down-regulated		SERPIND1	-1.21048	-2.35843	0.00875725	0.33966	down-regulated
CCL24	2.36642	-1.67511	0.0463141	1	UP-regulated		ARMT1	-2.52959	5.28651	0.030651	1	down-regulated		ZNF716	-1.40906	-3.57369	0.00881208	0.34026	down-regulated
PRAME	2.05837	-0.754202	0.0465347	1	UP-regulated		HMHB1	-3.67417	-3.32284	0.0308296	1	down-regulated		FOXG1	-1.60344	-3.24895	0.00966802	0.363453	down-regulated
SLC3A1	1.70041	-0.523293	0.0469724	1	UP-regulated		GLDC	-2.59866	1.59669	0.0308346	1	down-regulated		TUBA4B	-1.28478	-2.16875	0.00967161	0.363453	down-regulated
UGT2B7	2.72431	-2.72436	0.0471929	1	UP-regulated		CXCL17	-2.04905	1.25037	0.0310555	1	down-regulated		IL25	-1.23069	-3.54072	0.00996125	0.373623	down-regulated
PCDHA12	2.68194	-1.87442	0.0473874	1	UP-regulated		TUNAR	-3.84065	-0.716394	0.0312778	1	down-regulated		PRAMEF27	-1.87826	-3.5666	0.0100423	0.37523	down-regulated
NOS2	3.0429	-0.00706087	0.0476343	1	UP-regulated		LRRC31	-1.79506	1.25196	0.0315332	1	down-regulated		OR10W1	-1.37552	-3.86822	0.0100984	0.376611	down-regulated
CXCR5	2.6837	-2.83205	0.0485013	1	UP-regulated		NXPE4	-2.54421	-0.747922	0.0315741	1	down-regulated		C16orf82	-1.37122	-3.57717	0.010319	0.380581	down-regulated
NKX6-3	2.83913	-3.49468	0.0489318	1	UP-regulated		MIA2	-2.24313	-2.92035	0.0315792	1	down-regulated		HIST1H1B	-1.01729	-3.57765	0.010588	0.385238	down-regulated
BMP3	2.92537	0.206822	0.0490836	1	UP-regulated		IGLL5	-3.16169	1.91411	0.0320101	1	down-regulated		LIPN	-1.41713	-3.42949	0.010703	0.385969	down-regulated
OR4K2	1.48289	-3.59315	0.0498909	1	UP-regulated		GPR12	-2.17704	-3.22248	0.0323113	1	down-regulated		ELOA3	-1.39393	-4.05395	0.0108634	0.386791	down-regulated
							DLL3	-2.62993	-1.46457	0.0326165	1	down-regulated		C10orf113	-1.21783	-1.91626	0.0111712	0.394889	down-regulated
							FASTKD3	-1.56799	3.38293	0.0326734	1	down-regulated		GRIN2C	-1.00006	-0.906932	0.0111943	0.394996	down-regulated
							PROC	-2.16507	-0.103227	0.0327066	1	down-regulated		HABP2	-1.32074	-1.07862	0.0116278	0.403768	down-regulated
							ZNF695	-1.53344	-1.80202	0.0327878	1	down-regulated		POU4F2	-1.52578	-2.62111	0.0117753	0.407605	down-regulated
							ZNF865	-1.01465	5.8612	0.0328372	1	down-regulated		ADAM2	-1.34763	0.839171	0.0118005	0.407605	down-regulated
							EVX2	-1.41439	-0.990624	0.0329386	1	down-regulated		NAA11	-1.0439	-3.38041	0.0118352	0.408087	down-regulated
							DKK4	-3.61719	0.295476	0.0329452	1	down-regulated		ANKRD30B	-1.19003	-2.36334	0.0123559	0.423809	down-regulated
							AHSG	-4.05677	-3.16024	0.0338478	1	down-regulated		KCNV1	-1.26087	-3.88945	0.0124159	0.425126	down-regulated
							REG4	-2.94289	3.38673	0.0338876	1	down-regulated		PCDHGA3	-1.25341	-0.35084	0.0124826	0.425924	down-regulated
							HABP2	-3.0956	-0.893117	0.0340696	1	down-regulated		43535	-1.28417	-1.42587	0.0129264	0.438784	down-regulated
							CCDC144NL	-2.72108	-2.08353	0.0341791	1	down-regulated		PRKACG	-1.30908	-3.81827	0.0130385	0.441065	down-regulated
							HIST1H1B	-2.72703	-3.46372	0.0342368	1	down-regulated		OR52H1	-1.23569	-4.01177	0.0131486	0.444025	down-regulated
							CEP76	-1.25994	2.68794	0.0343953	1	down-regulated		OR1J4	-1.0783	-3.57777	0.0136548	0.45564	down-regulated
							ARMS2	-1.8185	-3.46113	0.0350307	1	down-regulated		KCNC2	-1.71451	3.82516	0.0136949	0.456202	down-regulated
							SCEL	-3.14998	-2.17761	0.0356842	1	down-regulated		CCDC169-SOHLH2	-1.16158	2.20578	0.0139774	0.4617	down-regulated
							OR2T10	-4.39082	-2.97133	0.0359331	1	down-regulated		DRC1	-1.03002	-2.5955	0.0142733	0.468327	down-regulated
							CLDN2	-2.17914	-2.64028	0.036082	1	down-regulated		OR5C1	-1.6687	1.6482	0.0143084	0.468694	down-regulated
							GRPR	-1.31613	0.892537	0.0360938	1	down-regulated		OR14A16	-1.65391	-3.10302	0.0144806	0.472761	down-regulated
							CACNA2D2	-1.14447	5.4228	0.0364718	1	down-regulated		OR5K4	-1.96277	-3.78695	0.0145536	0.474357	down-regulated
							IGFL4	-1.35884	-3.01702	0.0364874	1	down-regulated		OBP2A	-1.1315	-3.37638	0.0148413	0.480544	down-regulated
							KRT4	-2.47794	0.885599	0.0366124	1	down-regulated		FUT6	-1.37541	-1.75375	0.0149357	0.482013	down-regulated
							RASGEF1C	-1.36097	-1.05911	0.0367224	1	down-regulated		AL713999.1	-1.47852	-3.88053	0.0150538	0.48375	down-regulated
							MAGEB17	-1.06555	-1.3843	0.0370929	1	down-regulated		DAZ2	-1.54659	-3.78546	0.0150633	0.48375	down-regulated
							GRM3	-1.35399	-2.21585	0.03727	1	down-regulated		ATP8A2	-1.01315	2.99857	0.0153185	0.490343	down-regulated
							ECEL1	-3.35368	0.023142	0.037519	1	down-regulated		TH	-1.10515	-2.89704	0.0154186	0.491381	down-regulated
							TRIM31	-2.54106	-1.26306	0.0376572	1	down-regulated		AC115220.1	-1.24891	-4.11614	0.0156352	0.497241	down-regulated
							UTS2B	-2.73747	-0.315271	0.037842	1	down-regulated		ANKRD34C	-1.58289	4.92563	0.0164004	0.513263	down-regulated
							AC243756.1	-2.4097	-2.78981	0.0381101	1	down-regulated		FLG2	-1.02331	-3.11	0.0165036	0.513263	down-regulated
							EIF2B4	-1.05689	8.04244	0.0381592	1	down-regulated		TMEM212	-1.12529	-3.59229	0.0168418	0.515564	down-regulated
							AC005697.1	-2.62664	-3.29991	0.0383415	1	down-regulated		IFNA8	-1.61535	-3.89164	0.0168475	0.515564	down-regulated
							ALOX12B	-1.13055	1.80902	0.0384371	1	down-regulated		B3GNT6	-1.61905	2.1245	0.0168842	0.515564	down-regulated
							PRR26	-2.59231	1.00688	0.0385563	1	down-regulated		LRRC30	-1.56656	-3.483	0.017575	0.532234	down-regulated
							NLRP2B	-1.64525	-3.51123	0.0386717	1	down-regulated		TMEM92	-1.11698	-1.16168	0.0179881	0.539752	down-regulated
							ZNF645	-6.9997	-1.02254	0.0392599	1	down-regulated		INSM2	-1.09375	-2.74287	0.0184183	0.549307	down-regulated
							AC097372.1	-2.15914	-3.0887	0.0394887	1	down-regulated		OR5T2	-1.14772	-4.11936	0.0184927	0.550692	down-regulated
							CYP4X1	-1.96562	2.5741	0.0407431	1	down-regulated		FOXR2	-1.81713	-3.58084	0.0190783	0.558816	down-regulated
							CACNA1I	-3.51546	-0.126689	0.0412053	1	down-regulated		CD244	-1.07182	-0.797229	0.0192203	0.562138	down-regulated
							CHAT	-2.36414	-0.851597	0.0412706	1	down-regulated		CRYAA	-1.66914	-3.58917	0.0199612	0.576461	down-regulated
							CTRB1	-3.04421	-3.12157	0.0421789	1	down-regulated		VAX1	-1.16088	-3.00684	0.0203428	0.58113	down-regulated
							PCDHAC1	-2.44039	-1.93776	0.0427344	1	down-regulated		CHRNA3	-1.11555	-0.995691	0.02071	0.589904	down-regulated
							IL25	-3.36625	-3.47161	0.0429335	1	down-regulated		GSC2	-1.49705	-3.83232	0.020776	0.590929	down-regulated
							SCRT1	-1.81756	-3.0683	0.0429448	1	down-regulated		HMHB1	-1.30523	-3.39982	0.0215932	0.608011	down-regulated
							TMC1	-1.68696	0.363991	0.043066	1	down-regulated		AATK-AS1	-1.11998	-2.51557	0.0217328	0.611068	down-regulated
							OTOP3	-3.0334	-3.36018	0.0435756	1	down-regulated		FRG2C	-1.05151	-3.8071	0.022252	0.621223	down-regulated
							SPESP1	-3.18041	1.02923	0.0436549	1	down-regulated		LAMA1	-1.16471	0.241837	0.0225569	0.623534	down-regulated
							HLA-DMB	-2.19143	5.27468	0.0440005	1	down-regulated		ANKRD34B	-1.23931	2.26207	0.0229409	0.62818	down-regulated
							ADGRG7	-4.46192	-0.840213	0.0440292	1	down-regulated		DNAAF3	-1.05679	-0.821037	0.0245176	0.651047	down-regulated
							C5orf46	-2.48245	-2.15838	0.0443683	1	down-regulated		PSG6	-1.33026	-3.95244	0.024518	0.651047	down-regulated
							HIST2H4B	-3.17665	-3.03344	0.0443816	1	down-regulated		SCGN	-1.39603	2.39848	0.0249518	0.656496	down-regulated
							DPEP1	-2.11059	0.312571	0.0445268	1	down-regulated		GHSR	-1.14582	-4.09559	0.0251817	0.661659	down-regulated
							CLDN34	-1.68004	-3.1726	0.0452717	1	down-regulated		LGALS13	-1.39737	-2.56488	0.0258799	0.672256	down-regulated
							SLC16A14	-1.70373	6.77405	0.0454178	1	down-regulated		IQCJ	-1.25965	-3.09068	0.026165	0.675752	down-regulated
							AGMO	-1.48178	-0.458672	0.0454233	1	down-regulated		SLC17A6	-1.2213	-4.05355	0.027576	0.697527	down-regulated
							GABRA1	-2.70007	-0.636876	0.0456392	1	down-regulated		ABCC12	-1.3985	-1.37231	0.0276584	0.697858	down-regulated
							NLRP13	-2.45944	-2.6678	0.0457997	1	down-regulated		PRR27	-1.33062	-4.01995	0.0276601	0.697858	down-regulated
							TNFAIP8L3	-1.09923	2.97772	0.0461924	1	down-regulated		CCDC182	-1.0053	-4.02085	0.029352	0.728389	down-regulated
							UGT2B11	-2.18207	-2.18768	0.0471757	1	down-regulated		PRAMEF18	-1.03194	-4.13839	0.0297329	0.734134	down-regulated
							ITLN2	-2.3449	-0.97134	0.0472085	1	down-regulated		ADAM7	-1.38184	1.09384	0.0301036	0.736158	down-regulated
							UNC5CL	-1.17847	0.402467	0.0480288	1	down-regulated		CLPSL1	-1.13574	-3.56524	0.0307202	0.743566	down-regulated
							TEF	-1.12335	7.2412	0.0482126	1	down-regulated		INSM1	-1.04716	1.51007	0.0317384	0.755122	down-regulated
							AMBN	-5.93408	-1.89422	0.0483215	1	down-regulated		PRDM9	-1.07999	-3.85271	0.0319268	0.75675	down-regulated
							DLGAP3	-1.12998	-0.979799	0.0483537	1	down-regulated		MROH9	-1.00999	-2.1282	0.0331057	0.774719	down-regulated
							KLB	-1.94425	0.943387	0.0485651	1	down-regulated		MUC6	-1.53239	3.88024	0.0335365	0.776524	down-regulated
							SLC22A16	-1.4889	-1.5732	0.0489052	1	down-regulated		KDM4F	-1.12636	-2.34748	0.0335875	0.776524	down-regulated
							POU2AF1	-2.0009	0.287523	0.0489495	1	down-regulated		MAGEB2	-1.07893	-3.96865	0.0336613	0.776524	down-regulated
							SI	-2.41546	2.24678	0.0489529	1	down-regulated		SLC22A6	-1.38063	-0.897785	0.0338442	0.777072	down-regulated
							NRIP3	-2.23667	0.469251	0.049047	1	down-regulated		RTL1	-1.06175	-3.87422	0.0349045	0.795839	down-regulated
							AOC1	-3.75734	3.13878	0.049078	1	down-regulated		MBD3L1	-1.31682	-3.38975	0.0355426	0.802588	down-regulated
							EIF5AL1	-1.8848	0.980115	0.0492592	1	down-regulated		BMP5	-1.20221	1.29727	0.0356117	0.802652	down-regulated
							RLN1	-3.58901	5.06	0.0495977	1	down-regulated		GRM7	-1.17063	0.49632	0.0361193	0.809181	down-regulated
							HBQ1	-2.4532	-2.77857	0.0497289	1	down-regulated		GOLGA7B	-1.03613	0.369752	0.0364066	0.811265	down-regulated
							HNF1A	-3.02947	-0.818147	0.0498913	1	down-regulated		C18orf63	-1.1564	-4.05651	0.0377703	0.829428	down-regulated
							SCGB2B2	-1.66736	-1.17496	0.0499271	1	down-regulated		PDX1	-1.04153	-3.35489	0.0380066	0.831827	down-regulated
							KCNC2	-4.00221	4.03126	0.0499895	1	down-regulated		SLC2A2	-1.19842	-3.94923	0.0383633	0.83635	down-regulated
														SSX5	-1.09992	-4.08982	0.0389307	0.839894	down-regulated
														ART4	-1.09691	0.245028	0.0398703	0.851751	down-regulated
														CDX4	-1.30827	-3.49417	0.0410269	0.865175	down-regulated
														THSD7A	-1.05266	3.44184	0.0415106	0.870703	down-regulated
														NMBR	-1.02915	-2.54372	0.0422383	0.882202	down-regulated
														DSCR8	-1.26329	-3.47283	0.0436576	0.895664	down-regulated
														CDC20B	-1.1752	-0.988254	0.0437709	0.896388	down-regulated
														KRTAP22-1	-1.29124	0.663014	0.043936	0.898562	down-regulated
														OR9Q2	-1.28437	-3.29717	0.0446933	0.909319	down-regulated
														RAD21L1	-1.20208	-2.57909	0.0454677	0.918419	down-regulated
														AMY1C	-1.19328	-4.0416	0.0471578	0.942868	down-regulated
														DDX53	-1.28831	-3.70362	0.0476289	0.947469	down-regulated
														CES3	-1.03089	-0.119417	0.0484593	0.959133	down-regulated

## Sheet: miRNA
Supplementary Table 1B. Race differences in miRNA level.
Black vs Asian							White vs Asian							White vs Black
miRNA	logFC	logCPM	PValue	FDR	expression		miRNA	logFC	logCPM	PValue	FDR	expression		miRNA	logFC	logCPM	PValue	FDR	expression
hsa-mir-483	-8.00812	4.70885	1.65899e-31	2.16333e-28	down-regulated		hsa-mir-4770	2.15823	-0.646955	0.00563803	0.246581	UP-regulated		hsa-mir-508	2.27048	4.54106	2.30319e-06	0.000313444	UP-regulated
hsa-mir-1911	-4.93683	2.44697	7.26065e-15	4.73394e-12	down-regulated		hsa-mir-3130-2	1.14479	0.867144	0.0115637	0.37281	UP-regulated		hsa-mir-506	3.63484	0.0440137	1.25429e-05	0.00144436	UP-regulated
hsa-mir-1298	-4.72746	2.45584	8.12505e-14	3.53169e-11	down-regulated		hsa-mir-3130-1	1.04063	0.894268	0.0129066	0.383842	UP-regulated		hsa-mir-592	1.36065	1.69498	2.49352e-05	0.00257662	UP-regulated
hsa-mir-1912	-3.60061	0.518033	8.4726e-08	2.76207e-05	down-regulated		hsa-mir-514a-1	3.28003	1.18531	0.0132129	0.385248	UP-regulated		hsa-mir-372	2.45483	1.13034	4.34016e-05	0.00334403	UP-regulated
hsa-mir-3200	-1.71347	1.01008	1.21097e-07	3.03061e-05	down-regulated		hsa-mir-508	2.91377	4.68422	0.0155343	0.412481	UP-regulated		hsa-mir-1269a	2.26481	4.99289	5.72948e-05	0.00396583	UP-regulated
hsa-mir-1264	-4.03617	-0.379131	1.39445e-07	3.03061e-05	down-regulated		hsa-mir-516a-1	4.50257	0.441961	0.0278316	0.522034	UP-regulated		hsa-mir-522	3.09729	0.187557	8.43956e-05	0.00526418	UP-regulated
hsa-mir-34b	-1.93978	0.917843	1.22025e-06	0.000227316	down-regulated		hsa-mir-548ag-2	1.84512	-0.745411	0.0295617	0.522034	UP-regulated		hsa-mir-519a-1	2.7007	1.54115	8.95747e-05	0.00536373	UP-regulated
hsa-mir-34c	-1.47373	3.31013	7.41749e-06	0.00120905	down-regulated		hsa-mir-320c-1	1.02166	-0.339391	0.0296014	0.522034	UP-regulated		hsa-mir-514a-1	1.86218	1.08327	0.000273281	0.0131968	UP-regulated
hsa-mir-378a	-1.23883	9.29504	1.42507e-05	0.00206476	down-regulated		hsa-mir-3117	1.27151	-0.0367321	0.0313257	0.522034	UP-regulated		hsa-mir-1298	1.17754	1.1459	0.000365463	0.0160911	UP-regulated
hsa-mir-144	-1.16187	4.7733	0.000424898	0.0534006	down-regulated		hsa-mir-23c	1.53588	-0.00194105	0.0374224	0.543145	UP-regulated		hsa-mir-514a-2	1.76674	1.11595	0.000388295	0.0166079	UP-regulated
hsa-mir-592	-1.54737	1.15773	0.000450465	0.0534006	down-regulated		hsa-mir-4443	1.84795	-0.760538	0.0409475	0.561201	UP-regulated		hsa-mir-514a-3	1.68863	1.10488	0.000509345	0.0211802	UP-regulated
hsa-mir-451a	-1.15793	6.67838	0.000598339	0.0650195	down-regulated		hsa-mir-514a-2	2.5162	1.2191	0.0438166	0.56425	UP-regulated		hsa-mir-1911	1.0541	0.906342	0.000575963	0.0221793	UP-regulated
hsa-mir-1269a	-2.88149	4.09142	0.00105562	0.105886	down-regulated		hsa-mir-519a-1	3.77435	1.6377	0.0445159	0.56425	UP-regulated		hsa-mir-519a-2	2.35783	0.31609	0.000903372	0.03145	UP-regulated
hsa-mir-4326	-1.08547	1.65533	0.00176667	0.153583	down-regulated		hsa-mir-509-3	2.93798	0.956329	0.0499821	0.594588	UP-regulated		hsa-mir-1912	1.10477	-0.00755839	0.0016203	0.0514109	UP-regulated
hsa-mir-5687	-1.00878	0.776783	0.00199196	0.162344	down-regulated		hsa-mir-483	-8.58418	2.30012	8.45462e-289	1.2572e-285	down-regulated		hsa-mir-509-3	1.71083	0.881477	0.00195442	0.0581867	UP-regulated
hsa-mir-3662	-1.61023	-0.540197	0.00257435	0.186497	down-regulated		hsa-mir-1911	-3.80614	1.32306	2.60073e-24	1.93364e-21	down-regulated		hsa-mir-516a-1	2.10962	0.388758	0.00247926	0.066276	UP-regulated
hsa-mir-4660	-1.28346	-0.390572	0.004759	0.310287	down-regulated		hsa-mir-1298	-3.48468	1.50501	4.71028e-17	2.33473e-14	down-regulated		hsa-mir-4525	1.09494	-0.998232	0.00268174	0.0704309	UP-regulated
hsa-mir-7156	-1.60594	-0.273852	0.00673746	0.391549	down-regulated		hsa-mir-1264	-3.33843	-0.872091	6.43563e-14	2.39245e-11	down-regulated		hsa-mir-1283-1	2.00178	-0.797508	0.00284314	0.0733825	UP-regulated
hsa-mir-449a	-1.92095	1.52542	0.00690615	0.391549	down-regulated		hsa-mir-378a	-1.14948	8.89815	4.5765e-09	1.36105e-06	down-regulated		hsa-mir-509-2	1.56513	0.680341	0.00340019	0.0807949	UP-regulated
hsa-mir-877	-1.05458	0.0306274	0.0101278	0.442649	down-regulated		hsa-mir-3200	-1.47322	0.752393	1.23027e-08	3.04901e-06	down-regulated		hsa-mir-516a-2	2.0088	0.334564	0.00487486	0.102784	UP-regulated
hsa-mir-621	-2.11171	-0.822433	0.0104051	0.442649	down-regulated		hsa-mir-1912	-2.45899	0.126048	2.1384e-07	4.54257e-05	down-regulated		hsa-mir-371a	2.08815	-0.784371	0.00716732	0.134118	UP-regulated
hsa-mir-4787	-1.32986	-0.487035	0.0118985	0.456343	down-regulated		hsa-mir-7705	-1.31102	-0.0960243	0.00031083	0.0462204	down-regulated		hsa-mir-507	1.55511	-0.979192	0.00757736	0.137706	UP-regulated
hsa-mir-5680	-1.0313	0.498773	0.0157069	0.531621	down-regulated		hsa-mir-3662	-1.55803	-0.84496	0.000675207	0.083495	down-regulated		hsa-mir-1283-2	1.83953	-0.782237	0.00942706	0.156196	UP-regulated
hsa-mir-448	-2.07819	-0.813216	0.0158997	0.531621	down-regulated		hsa-mir-448	-1.78723	-1.09086	0.00072995	0.083495	down-regulated		hsa-mir-509-1	1.32576	0.681468	0.0110571	0.167196	UP-regulated
hsa-mir-449c	-1.82544	-0.593325	0.0188956	0.57987	down-regulated		hsa-mir-621	-1.84116	-1.1091	0.000856654	0.0874407	down-regulated		hsa-mir-513c	1.54042	-0.835115	0.023502	0.293187	UP-regulated
hsa-mir-4685	-1.3301	-0.725309	0.0193615	0.57987	down-regulated		hsa-mir-6787	-1.51635	-1.13061	0.000882051	0.0874407	down-regulated		hsa-mir-4784	-3.2797	-0.345506	5.61761e-37	8.40956e-34	down-regulated
hsa-mir-1252	-1.37149	-0.813176	0.0204333	0.57987	down-regulated		hsa-mir-34b	-1.28917	0.811963	0.000962768	0.0894772	down-regulated		hsa-mir-4449	-2.35893	0.737604	1.54489e-27	1.15635e-24	down-regulated
hsa-mir-6797	-1.72344	-0.795342	0.0227298	0.603963	down-regulated		hsa-mir-6844	-1.67085	-1.05894	0.00190791	0.155541	down-regulated		hsa-mir-4482	-2.24163	-0.959725	5.76611e-21	2.87729e-18	down-regulated
hsa-mir-6844	-1.96375	-0.785688	0.0256656	0.646499	down-regulated		hsa-mir-520f	-1.97358	-1.06878	0.00207299	0.155541	down-regulated		hsa-mir-1304	-1.71801	0.324942	2.04326e-19	7.64692e-17	down-regulated
hsa-mir-6783	-1.79979	-0.743278	0.0257806	0.646499	down-regulated		hsa-mir-6783	-1.68337	-1.0334	0.00220462	0.155541	down-regulated		hsa-mir-1248	-1.07275	1.43623	2.93842e-11	8.79762e-09	down-regulated
hsa-mir-3619	-1.59282	-0.720985	0.0288188	0.671067	down-regulated		hsa-mir-6797	-1.47221	-1.08257	0.00430078	0.220526	down-regulated		hsa-mir-767	-1.93969	-0.112583	6.65576e-09	1.66061e-06	down-regulated
hsa-mir-4739	-1.39134	-0.842996	0.0351678	0.752923	down-regulated		hsa-mir-137	-1.90611	1.7437	0.00521432	0.235414	down-regulated		hsa-mir-490	-1.64517	0.593216	1.88302e-06	0.000313444	down-regulated
hsa-mir-7849	-1.39091	-0.844515	0.0351678	0.752923	down-regulated		hsa-mir-5698	-1.44815	-0.449824	0.00600994	0.255337	down-regulated		hsa-mir-548x	-1.61874	-1.05761	2.20402e-06	0.000313444	down-regulated
hsa-mir-4525	-1.39044	-0.843272	0.0351678	0.752923	down-regulated		hsa-mir-4449	-1.15913	0.367366	0.0070734	0.276793	down-regulated		hsa-mir-517b	-1.71673	-0.707358	2.28907e-06	0.000313444	down-regulated
hsa-mir-5698	-1.73243	-0.0819652	0.0356473	0.752923	down-regulated		hsa-mir-449a	-1.73945	1.11348	0.0079232	0.289804	down-regulated		hsa-mir-517a	-1.71673	-0.707358	2.29253e-06	0.000313444	down-regulated
hsa-mir-7974	-1.4184	-0.737196	0.0357985	0.752923	down-regulated		hsa-mir-4724	-1.31937	-0.945385	0.00799055	0.289804	down-regulated		hsa-mir-346	-1.11814	-0.834423	1.0617e-05	0.00132447	down-regulated
hsa-mir-7113	-1.37306	-0.811369	0.0406314	0.761581	down-regulated		hsa-mir-5002	-1.22638	-0.809997	0.0106437	0.35971	down-regulated		hsa-mir-548y	-1.3337	-1.06367	2.58178e-05	0.00257662	down-regulated
hsa-mir-7702	-1.39032	-0.506576	0.0418076	0.761581	down-regulated		hsa-mir-4787	-1.08436	-0.740126	0.0158113	0.412481	down-regulated		hsa-mir-526b	-1.3508	-0.404383	3.06694e-05	0.00270071	down-regulated
hsa-mir-6787	-1.3388	-0.842802	0.043574	0.764808	down-regulated		hsa-mir-7156	-1.21189	-0.495704	0.0180428	0.440137	down-regulated		hsa-mir-518c	-1.49784	-0.890716	3.70591e-05	0.00308208	down-regulated
hsa-mir-3189	-1.14653	-0.454765	0.0439882	0.764808	down-regulated		hsa-mir-206	-1.93342	6.27804	0.0251021	0.522034	down-regulated		hsa-mir-105-1	-1.48204	-0.324227	4.46764e-05	0.00334403	down-regulated
hsa-mir-4482	2.37895	-0.403413	0.0034305	0.235441	UP-regulated		hsa-mir-3183	-1.23303	-1.08362	0.0255745	0.522034	down-regulated		hsa-mir-105-2	-1.30286	-0.412969	0.000186465	0.00962544	down-regulated
hsa-mir-490	3.35547	1.56015	0.00984661	0.442649	UP-regulated		hsa-mir-2682	-1.73641	-0.977064	0.0295227	0.522034	down-regulated		hsa-mir-3161	-1.1375	-0.897826	0.000768558	0.0280617	down-regulated
hsa-mir-767	2.7715	0.853145	0.0107251	0.442649	UP-regulated		hsa-mir-7113	-1.29856	-1.08331	0.0299388	0.522034	down-regulated		hsa-mir-518b	-1.12372	-0.849892	0.00221862	0.0626656	down-regulated
hsa-mir-4770	2.8996	-0.146343	0.0108626	0.442649	UP-regulated		hsa-mir-1273h	-1.07179	-1.12821	0.0313152	0.522034	down-regulated		hsa-mir-137	-1.03253	1.81827	0.0084536	0.148883	down-regulated
hsa-mir-1275	1.88177	0.417661	0.0115652	0.456343	UP-regulated		hsa-mir-4739	-1.16896	-1.10673	0.0323332	0.522034	down-regulated		hsa-mir-208b	-1.10086	-0.705752	0.0306304	0.350028	down-regulated
hsa-mir-105-2	2.25463	0.180154	0.0284783	0.671067	UP-regulated		hsa-mir-6852	-1.02274	-0.787797	0.032567	0.522034	down-regulated
hsa-mir-526b	2.33918	0.211314	0.0380277	0.757791	UP-regulated		hsa-mir-1237	-1.16812	-1.10534	0.0372406	0.543145	down-regulated
hsa-mir-518c	2.94528	-0.435996	0.0383545	0.757791	UP-regulated		hsa-mir-612	-1.35539	-0.613583	0.037622	0.543145	down-regulated
hsa-mir-516a-1	2.16385	-0.480412	0.0419096	0.761581	UP-regulated		hsa-mir-4423	-1.20361	-0.768188	0.0397271	0.561201	down-regulated
hsa-mir-105-1	2.2099	0.381779	0.0478564	0.789934	UP-regulated		hsa-mir-208b	-1.73484	-0.764095	0.0443556	0.56425	down-regulated
							hsa-mir-449c	-1.55761	-0.873918	0.0472792	0.572913	down-regulated

## Sheet: lncRNA
Supplementary Table 1C. Race differences in lncRNA level.
Black vs Asian							White vs Asian							White vs Black
lncRNA	logFC	logCPM	PValue	FDR	expression		lncRNA	logFC	logCPM	PValue	FDR	expression		lncRNA	logFC	logCPM	PValue	FDR	expression
FIRRE	4.67428	3.97498	0.000275125	0.0639328	up-regulated		LINC00207	4.82335	1.70644	0.000461011	0.102018	up-regulated		AC098649.1	4.83637	3.65328	1.77053e-11	8.49088e-09	up-regulated
AL672167.2	7.57999	4.25046	0.000303685	0.0662641	up-regulated		LLPH-AS1	2.03875	4.02961	0.000544633	0.113536	up-regulated		AC136475.9	3.27601	3.1724	6.56206e-08	1.62773e-05	up-regulated
AL121658.1	4.23719	6.49356	0.000541936	0.10381	up-regulated		AL121658.1	4.32464	6.73944	0.00056889	0.116899	up-regulated		LINC01541	4.58997	1.21333	1.72982e-07	3.89041e-05	up-regulated
C9orf41-AS1	2.94967	1.10294	0.000582015	0.110001	up-regulated		AC004947.1	3.26317	7.34067	0.000739839	0.138707	up-regulated		AP005131.2	3.81105	7.43509	3.42005e-07	7.34393e-05	up-regulated
AC006296.2	5.14632	0.647365	0.000676765	0.121976	up-regulated		AP005131.2	7.1271	7.46491	0.00074998	0.138707	up-regulated		AP002360.3	3.52945	6.59722	4.32297e-07	9.01371e-05	up-regulated
LINC00207	4.42773	1.2912	0.000729542	0.12767	up-regulated		FIRRE	3.96474	3.52256	0.000945595	0.160017	up-regulated		AL354754.1	2.22077	2.81099	5.29927e-07	0.000104439	up-regulated
AL731566.2	2.57162	3.44474	0.000766916	0.130976	up-regulated		C9orf41-AS1	2.79534	1.06783	0.00110432	0.175359	up-regulated		AC023301.1	3.09348	4.08668	8.91358e-07	0.000173297	up-regulated
LINC01020	6.45298	2.08609	0.000883934	0.145695	up-regulated		AC009097.4	5.23914	0.285316	0.00111494	0.175359	up-regulated		AL353747.3	1.82264	1.2111	1.76126e-06	0.000316741	up-regulated
AC107419.1	3.52814	2.65194	0.00103298	0.162853	up-regulated		AC104472.1	4.43187	1.54893	0.00130099	0.190953	up-regulated		LINC00403	2.81754	0.90214	2.31791e-06	0.000396998	up-regulated
AC005009.1	5.12001	0.8026	0.00103399	0.162853	up-regulated		AP000851.2	8.64386	3.229	0.00135644	0.191112	up-regulated		LINC00279	3.83042	-0.39096	2.46399e-06	0.000417052	up-regulated
LINC00648	5.07892	2.84975	0.00107535	0.167506	up-regulated		AL672167.2	7.47784	4.27122	0.00136449	0.191112	up-regulated		AC060814.6	2.45068	0.756202	3.32688e-06	0.000525976	up-regulated
AL390718.1	5.79681	3.4736	0.00110129	0.169682	up-regulated		AL512328.1	5.14971	0.220151	0.0016296	0.215048	up-regulated		AL356022.1	2.44025	0.898667	4.61521e-06	0.000721729	up-regulated
AL162413.1	4.75088	3.75492	0.00119302	0.178011	up-regulated		AC092687.2	4.19131	2.80359	0.00181769	0.231378	up-regulated		AC104823.1	2.83418	4.43715	6.17791e-06	0.000945548	up-regulated
AL356133.2	6.14562	4.43328	0.0013224	0.193247	up-regulated		AL078594.1	6.46115	1.21004	0.00191601	0.239651	up-regulated		LINC01823	3.43589	1.62982	6.29663e-06	0.000953575	up-regulated
AC009097.4	4.79031	-0.0593374	0.00146454	0.209696	up-regulated		AC074033.2	4.25655	0.00616955	0.00221213	0.258693	up-regulated		LINC00668	2.11448	10.0123	1.00486e-05	0.00129596	up-regulated
AL606468.1	3.29538	-0.53938	0.00155065	0.217565	up-regulated		AC010487.2	1.31143	4.80424	0.00226408	0.262633	up-regulated		AC055733.2	3.8702	-0.0853681	1.20905e-05	0.00146216	up-regulated
AC092687.2	4.00037	2.58416	0.00166285	0.227852	up-regulated		AC005009.1	5.03189	0.81795	0.00231269	0.266126	up-regulated		FP236383.3	4.78868	2.41405	1.29898e-05	0.0015445	up-regulated
AP000851.2	7.38011	1.91358	0.00167172	0.227852	up-regulated		LINC01781	2.97796	1.6773	0.00271553	0.298169	up-regulated		AL356310.1	2.48135	4.60646	1.54033e-05	0.00181645	up-regulated
AC003101.1	3.48948	-0.452172	0.00170003	0.229504	up-regulated		AC022098.3	3.57839	1.37621	0.00285425	0.308688	up-regulated		AC015468.4	3.0934	1.48643	1.68767e-05	0.00197402	up-regulated
LINC01619	2.95114	4.11033	0.00176249	0.2345	up-regulated		LINC02154	3.17092	-0.117055	0.0034314	0.345503	up-regulated		AC027343.3	3.63819	0.819306	2.05523e-05	0.00232823	up-regulated
AC092535.3	2.42557	2.32425	0.00196679	0.251021	up-regulated		AC145343.1	1.21785	2.70009	0.00343485	0.345503	up-regulated		AC106822.1	2.27396	-0.0924783	2.22148e-05	0.00247755	up-regulated
FAM99A	5.51428	3.0925	0.00218895	0.2652	up-regulated		AL162574.1	1.5811	0.444679	0.00363022	0.357651	up-regulated		AC025524.2	3.4431	0.22968	2.53542e-05	0.00278451	up-regulated
AC138932.2	2.82861	0.865754	0.00250289	0.290892	up-regulated		AC022144.1	1.86957	3.60689	0.00372369	0.364365	up-regulated		AC026741.1	1.60112	2.77305	2.75104e-05	0.00295367	up-regulated
AL078594.1	4.88963	-0.0131072	0.00257308	0.29414	up-regulated		AC093525.6	4.34564	2.3599	0.00384451	0.371137	up-regulated		FAM223B	2.08315	-0.695047	2.90034e-05	0.00309091	up-regulated
AC104472.1	2.8139	0.307831	0.00266766	0.302512	up-regulated		AC098649.1	4.92232	3.93605	0.00387156	0.371257	up-regulated		AC020594.1	1.55832	2.51609	3.02191e-05	0.00317344	up-regulated
LINC02416	3.55198	4.33932	0.00270922	0.304788	up-regulated		AP002360.3	5.21556	6.62153	0.00398625	0.371718	up-regulated		AC022239.1	2.30511	1.61462	3.71491e-05	0.00379053	up-regulated
AC107079.1	3.51099	2.10764	0.00283657	0.316602	up-regulated		AC004704.1	3.38497	0.6936	0.00398654	0.371718	up-regulated		AC092910.3	1.21236	7.82547	4.78933e-05	0.00471946	up-regulated
AC005050.1	3.52338	-0.375231	0.00293889	0.320452	up-regulated		AC005050.1	3.95001	-0.164745	0.00398846	0.371718	up-regulated		AC092674.1	2.91311	-0.861899	5.17498e-05	0.00489818	up-regulated
AC026495.1	4.17872	0.396521	0.00297636	0.320961	up-regulated		AL731566.2	2.44547	3.54205	0.00400925	0.371718	up-regulated		AL355922.5	2.51685	-0.583187	5.31497e-05	0.00496535	up-regulated
AC087190.3	1.8706	0.834046	0.0030636	0.320961	up-regulated		HAGLR	2.76873	7.31056	0.00405715	0.371718	up-regulated		LINC02010	2.17949	-0.0159682	6.28071e-05	0.00571902	up-regulated
LINC01287	5.51223	2.30326	0.00367748	0.352736	up-regulated		LINC00462	2.20069	0.18893	0.00419371	0.379385	up-regulated		AL356130.1	2.28387	1.11293	7.28891e-05	0.0065541	up-regulated
AC004704.1	3.45587	0.703082	0.00368289	0.352736	up-regulated		AC136475.9	4.37152	3.15528	0.0043233	0.383866	up-regulated		LINC02178	2.34661	1.70271	8.20517e-05	0.00706873	up-regulated
AC074033.2	4.02525	-0.190352	0.00432447	0.40121	up-regulated		AL138999.1	1.40661	1.79568	0.0044091	0.386986	up-regulated		AL731544.1	2.15008	-0.324089	9.34306e-05	0.00790697	up-regulated
AC068446.2	4.90128	-0.01617	0.00447314	0.411732	up-regulated		AC007207.2	3.73559	-0.0401081	0.00446123	0.386986	up-regulated		AL137076.1	2.52689	-0.333483	9.5459e-05	0.00803139	up-regulated
LINC00400	5.81656	1.02355	0.00485103	0.440077	up-regulated		AC100835.1	4.76536	-0.0393807	0.00511478	0.416176	up-regulated		AC087855.2	2.15768	-0.108016	9.99758e-05	0.00829343	up-regulated
AL512328.1	4.92608	-0.000258696	0.00495339	0.441599	up-regulated		AC110813.1	2.22917	0.861103	0.00512121	0.416176	up-regulated		LINC00636	2.72	0.738423	0.000100096	0.00829343	up-regulated
AC005592.1	3.91329	-0.224405	0.00507395	0.446995	up-regulated		AC068446.2	5.10273	0.166968	0.00520528	0.416176	up-regulated		LINC02330	1.95377	0.315678	0.000100879	0.00829343	up-regulated
AC106771.1	7.28756	1.82458	0.00525159	0.448441	up-regulated		AC137834.2	4.42909	-0.220664	0.00523692	0.416176	up-regulated		AL353753.1	3.05509	2.15112	0.000104216	0.00847091	up-regulated
AL713851.2	4.70114	-0.128582	0.00551907	0.457502	up-regulated		LINC00648	3.40965	1.45824	0.00533624	0.416354	up-regulated		AL596442.1	2.34429	0.0366314	0.00010531	0.00851174	up-regulated
AC130462.1	1.46811	0.332006	0.00563284	0.464218	up-regulated		AC138932.2	2.6572	0.823148	0.0058584	0.44425	up-regulated		AC004947.1	1.42122	7.13898	0.000110319	0.00881759	up-regulated
AC091151.1	4.86375	1.90849	0.00573163	0.46693	up-regulated		AC005592.1	3.65232	-0.323633	0.00586815	0.44425	up-regulated		AC008060.4	2.65973	1.73567	0.000129922	0.00999566	up-regulated
AC079062.1	3.95105	5.75475	0.00583734	0.468748	up-regulated		AC096996.2	2.95741	3.61483	0.00632436	0.466511	up-regulated		AC090044.1	2.22556	9.70199	0.00013998	0.0107068	up-regulated
AP005131.2	3.55587	3.62049	0.00585315	0.468748	up-regulated		AL596220.1	1.25713	2.16842	0.00638627	0.468674	up-regulated		AL355674.1	1.85349	1.2182	0.000160014	0.0117455	up-regulated
AC005618.1	1.69554	6.61811	0.00596548	0.471902	up-regulated		AC027279.1	1.31418	3.21259	0.00678382	0.488137	up-regulated		AC120498.4	1.46692	1.16099	0.000161008	0.0117585	up-regulated
LINC00937	2.93381	7.04248	0.00600837	0.471902	up-regulated		AC009237.14	1.05079	7.63368	0.00678722	0.488137	up-regulated		LINC00581	1.88788	2.92536	0.000180402	0.0129773	up-regulated
AC027279.1	1.60075	3.3469	0.00602936	0.471902	up-regulated		RNF144A-AS1	1.66952	5.97576	0.00686797	0.491084	up-regulated		AC015853.2	3.25308	0.365175	0.000189993	0.0135991	up-regulated
AC022098.3	2.52524	0.492321	0.00605899	0.471902	up-regulated		AC068987.3	1.68001	0.444596	0.00711002	0.496887	up-regulated		AL032821.1	2.62989	-0.70918	0.000214581	0.0149139	up-regulated
LINC01913	7.3933	1.92637	0.00627256	0.480614	up-regulated		PCAT5	2.59294	4.58182	0.00711615	0.496887	up-regulated		LINC00379	2.65421	-0.712143	0.000248197	0.0170852	up-regulated
AL391813.2	4.22531	2.9671	0.00651153	0.496242	up-regulated		LINC01913	7.50411	2.14206	0.00726566	0.502843	up-regulated		AL450468.1	2.48514	-0.844034	0.000251584	0.0171976	up-regulated
AL049820.1	5.06739	1.75432	0.00658418	0.498754	up-regulated		AL031651.1	3.92315	-0.450789	0.0074112	0.502843	up-regulated		AC007686.2	2.68014	7.60356	0.000253415	0.0171976	up-regulated
HOXB-AS2	2.17028	1.16285	0.00661486	0.498754	up-regulated		AC061975.1	5.08052	0.591199	0.00758827	0.51244	up-regulated		AL008733.1	1.22145	0.199489	0.000294551	0.0194426	up-regulated
AC079360.1	2.91758	-0.274476	0.00684406	0.50793	up-regulated		AP001993.1	3.86807	2.97068	0.00764934	0.51415	up-regulated		AL589684.1	1.56572	1.2403	0.000296645	0.0194878	up-regulated
AC007207.2	3.04654	-0.434857	0.00713738	0.518833	up-regulated		AL035588.1	2.88698	-0.257608	0.00800473	0.531356	up-regulated		AC011700.1	2.49582	0.925165	0.000318314	0.0207221	up-regulated
AC090772.1	4.3659	4.31529	0.00717694	0.519047	up-regulated		AC079630.1	1.19634	3.71858	0.00802124	0.531356	up-regulated		AC018816.1	3.29565	5.83704	0.00033594	0.0215766	up-regulated
AC016877.3	2.0342	4.56376	0.00737899	0.53095	up-regulated		AL138885.3	3.08948	0.238187	0.00821347	0.536635	up-regulated		DLEU1-AS1	2.12536	-0.0243437	0.000337885	0.0216051	up-regulated
AC022144.1	1.69549	3.1929	0.00749825	0.535992	up-regulated		AC016396.1	1.71311	0.1224	0.00830368	0.536635	up-regulated		AC108868.1	1.5536	0.84245	0.000347992	0.0221529	up-regulated
AC093525.6	3.38749	1.43411	0.0076325	0.540954	up-regulated		LINC02416	3.37117	4.22321	0.00834575	0.536635	up-regulated		LINC00919	3.79418	0.118133	0.000379907	0.0237942	up-regulated
AC009081.1	2.78328	0.536103	0.00777094	0.543515	up-regulated		AC068389.2	1.69052	1.66249	0.00839425	0.536635	up-regulated		AL157414.2	2.61761	0.156274	0.000404373	0.0249919	up-regulated
AL449043.1	5.45727	0.334257	0.00779409	0.543515	up-regulated		AL160411.1	4.28511	-0.30522	0.00855525	0.539017	up-regulated		AC011369.1	3.56442	0.35251	0.000406132	0.0249919	up-regulated
AC037459.4	1.91224	-0.0473135	0.00790038	0.546283	up-regulated		AL118522.1	1.45503	2.07917	0.00856663	0.539017	up-regulated		AL356652.1	1.99298	1.93509	0.000416723	0.0254042	up-regulated
AC131902.1	5.85744	6.61271	0.00800752	0.551003	up-regulated		LINC01698	2.95416	3.16371	0.00858098	0.539017	up-regulated		AP002498.1	1.07329	6.393	0.000495438	0.0293328	up-regulated
AC005772.1	4.3524	2.90185	0.00806491	0.552271	up-regulated		LINC02064	4.98434	0.0803319	0.0085814	0.539017	up-regulated		AC099342.1	2.37908	-0.725433	0.000547175	0.0314888	up-regulated
LINC00442	3.23708	-0.512963	0.0081914	0.553575	up-regulated		AC009292.1	1.93461	-0.267799	0.0086719	0.539985	up-regulated		LINC02450	2.33361	0.650166	0.000591796	0.0332585	up-regulated
AC009495.1	1.59441	2.20383	0.00821386	0.553575	up-regulated		BX005266.2	3.56678	1.65539	0.00884077	0.548128	up-regulated		AP000769.2	1.53072	0.036301	0.000600876	0.033507	up-regulated
AC009387.1	2.16822	3.20824	0.00824017	0.553575	up-regulated		LINC01975	2.44328	0.63793	0.00912203	0.560732	up-regulated		AL136987.2	2.65648	1.91323	0.000639727	0.0352634	up-regulated
AC010595.1	4.41107	0.663325	0.00855659	0.565224	up-regulated		AP002008.3	3.11557	-0.550355	0.00954835	0.574311	up-regulated		AC092078.2	1.73964	-0.158824	0.000681841	0.0371577	up-regulated
AP003064.1	8.55822	3.03626	0.00856473	0.565224	up-regulated		AC026495.1	4.00585	0.315724	0.00965969	0.574311	up-regulated		LINC01940	1.0341	0.749978	0.000708144	0.0380608	up-regulated
LINC01781	2.1409	0.97709	0.00857306	0.565224	up-regulated		LINC01619	2.4073	3.91642	0.00994579	0.588725	up-regulated		AC034213.1	2.22414	-0.621392	0.000726466	0.0388538	up-regulated
AC013799.1	4.32589	2.42796	0.00879547	0.573382	up-regulated		AC090241.2	3.9075	-0.478204	0.0100002	0.589519	up-regulated		AC241644.2	2.13888	-0.869914	0.000832441	0.0435503	up-regulated
AC087620.1	2.67757	-0.400277	0.00886639	0.573382	up-regulated		AC092681.2	1.7604	2.30976	0.0102498	0.59366	up-regulated		AC023794.1	1.628	1.2177	0.000845468	0.0437545	up-regulated
AL136982.3	4.18351	-0.393122	0.00892641	0.573382	up-regulated		AL356133.2	5.20887	3.8807	0.0103175	0.59366	up-regulated		AL445531.1	1.9382	-0.741548	0.000930283	0.0477999	up-regulated
AC074117.1	1.47669	8.16444	0.00893064	0.573382	up-regulated		AC138207.1	3.87585	-0.486288	0.0104388	0.59366	up-regulated		AC117382.2	1.53736	1.72701	0.000968988	0.0492609	up-regulated
AC011773.4	1.4848	3.31378	0.00897264	0.573382	up-regulated		HOXB-AS2	2.08893	1.21087	0.0104419	0.59366	up-regulated		AC093879.2	1.90091	-0.794431	0.000984458	0.0498711	up-regulated
AC121342.1	2.10672	1.44564	0.0090204	0.573382	up-regulated		AC005962.2	1.03042	4.38996	0.0106028	0.600438	up-regulated		AC010132.1	1.42113	0.2509	0.00100531	0.0507487	up-regulated
AP001122.1	3.8997	2.80324	0.00925463	0.585249	up-regulated		AL035530.1	1.3311	-0.121429	0.0108697	0.607661	up-regulated		AL391987.4	1.07241	1.33308	0.00115516	0.056721	up-regulated
AP001993.1	3.08109	2.18905	0.0093608	0.585249	up-regulated		AC048382.1	1.06782	2.92505	0.0108994	0.607661	up-regulated		TTTY16	2.5035	1.18573	0.00119292	0.0574241	up-regulated
AC100835.1	3.91553	-0.498811	0.0093669	0.585249	up-regulated		AC091151.1	4.302	1.49854	0.010961	0.608739	up-regulated		AL162584.1	1.32639	-1.02703	0.00119742	0.0574241	up-regulated
AC110813.1	1.91719	0.526279	0.00937224	0.585249	up-regulated		LINC01287	4.86873	1.88008	0.0110669	0.612254	up-regulated		LINC02187	1.84877	0.899584	0.00125672	0.059869	up-regulated
BX284668.2	2.15513	3.06249	0.00959064	0.592928	up-regulated		AC087190.3	1.63267	0.642135	0.0111544	0.614311	up-regulated		AC104985.1	1.69995	3.20211	0.00129738	0.0609982	up-regulated
AC244517.2	3.12455	2.02289	0.00977171	0.599627	up-regulated		LINC01535	1.51612	5.72651	0.0111895	0.614311	up-regulated		THRA1/BTR	1.13061	0.457374	0.00132335	0.0616151	up-regulated
AL391869.1	2.46432	0.782693	0.00985236	0.601971	up-regulated		AL354824.2	4.29051	1.1597	0.011296	0.617487	up-regulated		AC026471.5	1.23107	0.909173	0.0013816	0.0627036	up-regulated
AL160411.1	4.11112	-0.424866	0.0103838	0.622472	up-regulated		LINC00244	1.6278	3.06087	0.0113332	0.617487	up-regulated		AC087633.2	2.35369	0.12569	0.00147907	0.0667067	up-regulated
AC010487.2	1.3397	4.71197	0.0103922	0.622472	up-regulated		AC090970.3	1.97625	3.68611	0.0115276	0.624881	up-regulated		C5orf64	1.99842	1.3264	0.00154375	0.0687613	up-regulated
AC083841.1	2.50661	0.263092	0.0103927	0.622472	up-regulated		FAM99A	4.61744	2.38322	0.0115898	0.624881	up-regulated		AP001269.4	1.80563	-1.08173	0.00159308	0.0703057	up-regulated
AC010746.1	2.79291	-0.67838	0.0104345	0.622472	up-regulated		AC107884.2	1.32561	2.85944	0.011809	0.631412	up-regulated		LINC01731	1.66652	4.30958	0.00160428	0.0703683	up-regulated
AC009127.2	3.04616	-0.60213	0.0104514	0.622472	up-regulated		ATP2B1-AS1	1.42486	9.81288	0.0118205	0.631412	up-regulated		AL136097.2	1.88933	2.06975	0.00163079	0.0713137	up-regulated
LINC00462	1.91345	-0.0765254	0.0111526	0.658703	up-regulated		AC113383.1	1.04426	2.51635	0.0122419	0.642099	up-regulated		LINC01777	1.55924	-0.300221	0.00166293	0.072364	up-regulated
MIR2052HG	3.69484	5.17345	0.0115405	0.670435	up-regulated		AC099520.2	3.24609	0.232117	0.0122908	0.642099	up-regulated		AL035446.1	2.26842	1.41117	0.00166487	0.072364	up-regulated
AC018754.1	1.21889	5.50442	0.0118294	0.677492	up-regulated		AP001439.1	3.18292	-0.329701	0.012364	0.642099	up-regulated		AL138899.1	1.49617	1.47888	0.00170176	0.0734601	up-regulated
AC007091.1	3.70571	1.00588	0.0118582	0.677492	up-regulated		AF067845.1	2.37229	1.3421	0.0125485	0.649274	up-regulated		AC105345.2	1.41238	1.84628	0.00170541	0.0734601	up-regulated
AC008115.2	1.98166	-0.091596	0.0118964	0.677492	up-regulated		AP000924.1	4.12907	-0.398085	0.0126307	0.649854	up-regulated		AC108727.1	1.68361	2.30007	0.00172645	0.0739237	up-regulated
AC007001.1	5.24174	3.03794	0.0119009	0.677492	up-regulated		AC007686.2	4.8386	7.53668	0.0126501	0.649854	up-regulated		ZNF385D-AS1	1.27169	1.04751	0.00204992	0.0850974	up-regulated
LINC01551	4.54177	-0.230345	0.0121035	0.680975	up-regulated		LINC02280	1.89742	0.181969	0.01273	0.650695	up-regulated		LINC02272	1.0051	-0.594834	0.00212382	0.0875515	up-regulated
AC025043.1	1.77113	2.86907	0.012167	0.681691	up-regulated		AL390718.1	2.71377	0.789046	0.012757	0.650695	up-regulated		AC008060.1	2.48432	1.51099	0.00218326	0.0894886	up-regulated
AP001775.2	3.44259	0.825729	0.0124626	0.695499	up-regulated		AF064858.1	1.33522	2.68191	0.0129725	0.652436	up-regulated		AC021683.3	1.73575	1.13325	0.00224739	0.0910796	up-regulated
AC145343.1	1.28318	2.68714	0.0125821	0.699416	up-regulated		AC011773.4	1.16749	3.13248	0.0130635	0.654721	up-regulated		LINC02188	1.16254	4.40297	0.00234143	0.0935727	up-regulated
AC090503.2	2.07743	1.04713	0.0128564	0.709105	up-regulated		AC012414.5	2.56201	3.63604	0.0131432	0.656429	up-regulated		AC099328.2	1.78292	-0.941863	0.00241686	0.0960533	up-regulated
AL353135.1	1.9793	2.11218	0.0131629	0.717632	up-regulated		AP005131.3	3.16401	0.574415	0.0132373	0.656909	up-regulated		EDNRB-AS1	1.11056	1.12055	0.0024496	0.0965546	up-regulated
AC078882.1	4.2714	-0.058894	0.0134778	0.729192	up-regulated		AL031283.2	2.35049	2.17284	0.0132656	0.656909	up-regulated		AP002439.1	1.12383	-1.13031	0.00251751	0.0981101	up-regulated
LINC01169	1.58481	2.9099	0.0137467	0.740908	up-regulated		LINC02139	1.5086	1.94093	0.0132898	0.656909	up-regulated		AC025811.1	1.40259	-0.710911	0.00252377	0.0981101	up-regulated
AL596220.1	1.38004	2.23424	0.0138139	0.741713	up-regulated		AC009041.1	1.67741	0.474647	0.0134652	0.661038	up-regulated		LINC02128	2.32297	-0.165087	0.00262707	0.101052	up-regulated
AC139887.3	1.57446	-0.783696	0.0139157	0.744358	up-regulated		AC107079.1	2.13669	0.988406	0.013573	0.661959	up-regulated		CASC11	1.44607	4.18357	0.00274782	0.103948	up-regulated
AC104809.2	2.99417	2.33566	0.0140087	0.746518	up-regulated		AC013799.1	3.90179	2.11137	0.0136677	0.661959	up-regulated		AC136628.1	1.57933	-1.03693	0.00275277	0.103948	up-regulated
ITFG1-AS1	1.58	1.07238	0.0145343	0.762567	up-regulated		LINC01068	1.2866	1.00836	0.0136941	0.661959	up-regulated		AL590666.2	1.10594	0.747969	0.00279029	0.104702	up-regulated
AC005962.2	1.42413	4.73167	0.0146756	0.762567	up-regulated		AC005753.1	1.37626	1.6032	0.013822	0.661959	up-regulated		AP003121.1	2.09424	-1.05335	0.00289007	0.107164	up-regulated
LINC01556	4.09227	1.85768	0.0147623	0.762567	up-regulated		FAM30A	2.12767	4.11652	0.0138287	0.661959	up-regulated		AC007496.1	1.59831	0.0300878	0.00294704	0.108437	up-regulated
AC011290.1	1.37265	0.738683	0.0147962	0.762567	up-regulated		AC010746.1	3.02717	-0.606252	0.0139254	0.662131	up-regulated		LINC01698	1.2688	2.96852	0.00309932	0.112886	up-regulated
AL355512.1	1.69539	0.099087	0.014797	0.762567	up-regulated		AC015813.3	3.92071	-0.195229	0.0140567	0.665105	up-regulated		AL731563.2	1.15709	0.58059	0.003115	0.11317	up-regulated
LINC01666	3.92042	1.75286	0.0149055	0.762567	up-regulated		AL133467.1	2.37349	1.23472	0.0142709	0.669051	up-regulated		AP000842.2	1.54251	-0.691503	0.00339054	0.119266	up-regulated
AC026790.2	4.65226	-0.174893	0.0149529	0.762567	up-regulated		AC087620.1	2.55734	-0.425191	0.014333	0.669369	up-regulated		AL049835.1	1.33911	4.88883	0.00358452	0.12513	up-regulated
AC005256.1	5.10117	0.453598	0.0150476	0.762567	up-regulated		AC097059.2	4.2255	-0.350596	0.0144703	0.671424	up-regulated		LINC01894	2.46117	-0.149132	0.00386531	0.132091	up-regulated
AC068987.3	1.3047	0.150468	0.0150886	0.762567	up-regulated		LINC00636	4.2836	0.893185	0.0145243	0.67176	up-regulated		LINC01795	1.51005	1.32591	0.00418716	0.141743	up-regulated
AL445248.1	2.87364	4.75615	0.0151168	0.762567	up-regulated		AC025043.1	1.36816	2.56124	0.0147459	0.67533	up-regulated		AL121718.1	1.1737	-0.162798	0.00427677	0.143795	up-regulated
AC061975.1	3.80518	-0.256145	0.0151993	0.762703	up-regulated		AL355500.1	1.97486	-0.705259	0.0148362	0.67533	up-regulated		LAMA5-AS1	1.90416	1.96881	0.00428775	0.143795	up-regulated
AC068313.1	3.13125	-0.56514	0.0155278	0.766876	up-regulated		AC099550.1	3.82821	-0.519286	0.0151732	0.677097	up-regulated		AC073050.1	2.23262	-0.118763	0.00431242	0.144286	up-regulated
LINC01975	2.47195	0.572688	0.0155437	0.766876	up-regulated		AL354984.1	1.90681	2.12076	0.0152045	0.677097	up-regulated		PCDH9-AS1	2.63877	-0.576882	0.00446704	0.14853	up-regulated
AC104051.2	3.49071	2.23939	0.0155978	0.766876	up-regulated		AC017002.1	2.92428	-0.63846	0.0157511	0.68864	up-regulated		LINC01234	1.69434	0.700381	0.00447025	0.14853	up-regulated
AL354824.2	4.12996	0.944049	0.015652	0.766876	up-regulated		AC011298.1	2.13933	3.60175	0.0158745	0.68864	up-regulated		AC246817.2	1.65479	3.64676	0.0046335	0.151624	up-regulated
LINC00993	6.78993	4.65542	0.0157106	0.766876	up-regulated		LINC00359	3.59389	-0.60615	0.0159806	0.688712	up-regulated		AL158840.1	1.41969	0.322124	0.00463715	0.151624	up-regulated
AL031651.1	3.89162	-0.524155	0.0157355	0.766876	up-regulated		AL512604.3	1.47276	1.29518	0.016016	0.688712	up-regulated		AL158166.1	1.05928	0.374163	0.00478659	0.154528	up-regulated
AC091987.1	3.15807	0.918524	0.0159059	0.772146	up-regulated		AL590666.3	3.06852	-0.0572511	0.0160399	0.688712	up-regulated		AL365184.1	2.22474	-0.544075	0.00481437	0.154528	up-regulated
AC092681.2	2.06922	2.45569	0.0159655	0.772393	up-regulated		AC022784.8	2.83371	-0.641312	0.0162406	0.693279	up-regulated		AC015909.3	1.59447	6.52448	0.0048266	0.154528	up-regulated
AC009468.1	2.72136	2.97457	0.0160315	0.772623	up-regulated		TESC-AS1	2.96783	-0.626862	0.0162664	0.693279	up-regulated		AC003084.1	1.79307	-0.136858	0.00488443	0.155092	up-regulated
AC090241.2	3.63365	-0.611938	0.0162441	0.775394	up-regulated		AC037459.4	1.72751	-0.176463	0.0162909	0.693279	up-regulated		LINC02004	1.11424	0.358256	0.00489411	0.155092	up-regulated
TMEM202-AS1	1.77686	7.54902	0.0162782	0.775394	up-regulated		AL133342.1	3.31263	0.995537	0.0164667	0.697911	up-regulated		AC246817.1	1.35571	1.64086	0.00498019	0.157473	up-regulated
BX005266.2	3.26949	1.1559	0.016301	0.775394	up-regulated		AC005772.1	3.71957	2.42431	0.0165601	0.697911	up-regulated		AC055736.1	1.40075	-1.13748	0.00517451	0.160811	up-regulated
LINC02139	1.72731	2.05087	0.0163644	0.775805	up-regulated		AL353135.1	1.76135	1.95726	0.0166407	0.697911	up-regulated		AC027338.2	1.14523	1.52822	0.00518485	0.160811	up-regulated
LINC02154	1.93065	-0.716385	0.0164401	0.776793	up-regulated		AC009495.1	1.43167	2.2726	0.0168119	0.69864	up-regulated		CHRM3-AS1	1.04389	-0.11971	0.00519027	0.160811	up-regulated
AC068389.2	1.44075	1.40108	0.0165886	0.781208	up-regulated		AC092535.3	2.00232	2.16417	0.016858	0.69864	up-regulated		AC009509.1	1.33742	3.3283	0.00519753	0.160811	up-regulated
BX322557.2	1.81603	-0.512288	0.0166863	0.781904	up-regulated		ITFG1-AS1	1.74467	1.31217	0.0169324	0.69864	up-regulated		AC007608.1	1.04509	0.807361	0.00524345	0.161191	up-regulated
AC138150.1	1.53608	2.62422	0.0167137	0.781904	up-regulated		AL139424.1	3.09112	-0.582175	0.0169511	0.69864	up-regulated		AC083801.2	1.95857	-0.826002	0.0053307	0.162567	up-regulated
C9orf163	1.6256	4.28661	0.0168458	0.78549	up-regulated		AL590666.2	2.07423	0.845453	0.0170933	0.702487	up-regulated		AC024651.1	1.13171	0.208068	0.00548458	0.164047	up-regulated
HAGLR	2.03498	6.28203	0.0169114	0.785964	up-regulated		AC138150.1	1.46279	2.73882	0.0173389	0.70853	up-regulated		AC007750.1	2.04524	5.81082	0.00555902	0.165585	up-regulated
LINC00305	1.87319	-0.70887	0.0170921	0.789709	up-regulated		SLC25A21-AS1	1.19195	7.16056	0.0175575	0.7114	up-regulated		LINC01735	1.06867	-0.132909	0.00579084	0.171073	up-regulated
AL162574.1	1.61982	0.449117	0.0171781	0.789709	up-regulated		AC092598.1	3.6323	-0.0927909	0.0176113	0.711577	up-regulated		AC010336.3	1.33513	0.618792	0.0058284	0.171265	up-regulated
AC068397.2	3.2066	1.5788	0.0172148	0.789709	up-regulated		LINC02217	3.6498	-0.602111	0.0179419	0.717755	up-regulated		AL356361.2	1.02775	-1.1353	0.00587417	0.171597	up-regulated
LINC02064	4.08388	-0.450145	0.0175494	0.798977	up-regulated		AC074117.1	1.0751	7.90628	0.017974	0.717755	up-regulated		LINC01098	1.52583	-0.721397	0.00596775	0.173451	up-regulated
AL445190.1	2.35397	-0.451322	0.0175902	0.798977	up-regulated		AC083841.1	2.40046	0.267728	0.0180137	0.717755	up-regulated		AL161630.1	2.19629	2.80573	0.00604316	0.175288	up-regulated
AL158835.2	1.0778	3.31371	0.0176423	0.798977	up-regulated		LINC02215	1.92017	-0.903322	0.0180783	0.718336	up-regulated		AC008440.2	1.31307	-0.30493	0.00618593	0.178351	up-regulated
AC104458.1	3.29047	4.85194	0.0178539	0.805973	up-regulated		AC124069.1	3.74608	-0.558518	0.0182779	0.720419	up-regulated		AL121656.1	1.37223	1.33943	0.00635894	0.182243	up-regulated
AC010894.3	5.98042	2.74717	0.0179105	0.805973	up-regulated		AL591178.1	1.82242	1.28887	0.0182809	0.720419	up-regulated		AC026785.2	1.4848	-1.00368	0.00652297	0.185101	up-regulated
AC092447.4	1.90623	-0.38767	0.018228	0.812176	up-regulated		AC009127.2	2.84165	-0.675581	0.0185955	0.727062	up-regulated		XIRP2-AS1	1.46552	-1.03251	0.00659349	0.186285	up-regulated
AP001439.1	3.01928	-0.44592	0.018317	0.812176	up-regulated		AP000897.2	1.41922	1.40902	0.0187203	0.727062	up-regulated		AC090696.1	1.00469	1.62851	0.00662301	0.186285	up-regulated
AC114912.1	3.60839	-0.395815	0.0183424	0.812176	up-regulated		AC002463.1	4.49161	2.05461	0.0187473	0.727062	up-regulated		AC126696.2	1.93762	-0.78301	0.00664406	0.186332	up-regulated
AL008638.1	1.88895	-0.439436	0.0185117	0.812176	up-regulated		AP001107.6	1.42962	-0.0256673	0.0188131	0.727062	up-regulated		AC002511.1	1.2466	6.2509	0.00679139	0.18928	up-regulated
AC010890.1	1.65848	2.59047	0.0185176	0.812176	up-regulated		LINC01551	6.07787	0.868767	0.0189351	0.727062	up-regulated		SRGAP3-AS2	2.01247	1.97298	0.00680182	0.18928	up-regulated
LINC01143	2.47581	0.296583	0.0186241	0.812176	up-regulated		FP236383.3	6.6714	2.70985	0.018955	0.727062	up-regulated		AP001627.1	1.30001	4.1503	0.00685937	0.190418	up-regulated
AC245748.3	2.48254	3.72576	0.0186497	0.812176	up-regulated		AC093915.1	4.85238	-0.0107444	0.0190591	0.728966	up-regulated		AC113137.1	1.70367	-0.61332	0.00698524	0.192425	up-regulated
TTC39C-AS1	2.45428	1.48978	0.0187331	0.812176	up-regulated		AC020928.2	3.09984	-0.585809	0.0191781	0.728966	up-regulated		AC112251.1	2.40901	0.956763	0.00703214	0.192425	up-regulated
C5orf60	1.49513	3.08503	0.0188695	0.812176	up-regulated		AC104212.3	3.06704	-0.608609	0.0192134	0.728966	up-regulated		OVCH1-AS1	1.85236	0.903973	0.0071938	0.194179	up-regulated
AC027281.1	4.04587	1.51701	0.0189078	0.812176	up-regulated		AC023137.1	4.0877	0.317186	0.0192369	0.728966	up-regulated		AL391839.1	2.12474	-0.306283	0.00741416	0.196306	up-regulated
MACC1-AS1	2.22703	1.21017	0.0192818	0.825741	up-regulated		AC025754.2	2.2526	0.639964	0.019258	0.728966	up-regulated		TERC	1.25631	0.00742574	0.00743791	0.196306	up-regulated
AC011298.1	1.95029	3.23057	0.0194022	0.828394	up-regulated		LINC01887	2.62106	-0.849631	0.0193366	0.730022	up-regulated		AC004923.1	1.57478	1.00005	0.00753419	0.198162	up-regulated
AC008738.6	3.7035	-0.597926	0.0194624	0.828466	up-regulated		AC093423.2	1.06028	1.12504	0.0194967	0.734139	up-regulated		AC009268.2	1.55741	2.02899	0.00763367	0.200047	up-regulated
AL512604.3	1.34939	1.14417	0.0195755	0.828904	up-regulated		AC010890.1	1.51654	2.51593	0.0195833	0.735474	up-regulated		LINC01571	1.77998	-0.698143	0.00785745	0.203562	up-regulated
AC004947.1	1.66357	5.56571	0.0197347	0.828904	up-regulated		AC008750.4	3.66638	-0.589444	0.0197268	0.738595	up-regulated		SSTR5-AS1	1.58466	5.44247	0.00808701	0.205925	up-regulated
AC097487.1	3.64507	-0.630289	0.0199379	0.828904	up-regulated		F11-AS1	4.8533	3.71071	0.0197691	0.738595	up-regulated		AC103808.5	1.29236	-0.776959	0.00814199	0.206952	up-regulated
AC139530.1	1.01039	7.38099	0.0199405	0.828904	up-regulated		AC106028.5	1.47129	1.2652	0.0201753	0.750843	up-regulated		AL021026.1	1.30453	1.51888	0.00820042	0.20771	up-regulated
AL139424.1	3.1192	-0.589363	0.0201375	0.834644	up-regulated		TMEM202-AS1	1.45955	7.29723	0.020529	0.759099	up-regulated		AC104237.2	1.12845	-0.0924106	0.00873788	0.217119	up-regulated
ATP2B1-AS1	1.65897	10.022	0.0203116	0.839408	up-regulated		AC068397.2	2.82646	1.31887	0.0206826	0.760455	up-regulated		AC023158.1	1.39896	0.107267	0.0087948	0.218156	up-regulated
AC004224.2	1.87601	-0.768501	0.0205463	0.844186	up-regulated		AL606468.1	2.43043	-0.822106	0.020725	0.760455	up-regulated		LINC00970	1.87929	-0.626917	0.00888677	0.220045	up-regulated
AL139350.1	2.54445	0.332114	0.0207677	0.846959	up-regulated		AC007391.1	3.42787	-0.665875	0.0207772	0.760455	up-regulated		BX284656.1	1.5072	0.640472	0.00891852	0.220045	up-regulated
AC121764.1	2.11112	0.432953	0.0207931	0.846959	up-regulated		AC104823.1	3.73073	4.71968	0.0208603	0.760716	up-regulated		AC093890.1	1.02931	1.09044	0.0090423	0.221999	up-regulated
AC010333.2	2.75341	3.77788	0.0209561	0.847787	up-regulated		PLCG1-AS1	1.02896	2.85303	0.0208901	0.760716	up-regulated		AC097504.2	1.20012	-0.682123	0.00906989	0.222297	up-regulated
AC098483.1	4.11624	1.59959	0.0209804	0.847787	up-regulated		AC068313.1	3.89326	-0.211525	0.021294	0.769581	up-regulated		AC079031.2	1.66127	-0.965095	0.00912607	0.222915	up-regulated
AC093904.2	4.50177	0.384747	0.0210059	0.847787	up-regulated		AC011290.1	1.29393	0.712434	0.0213811	0.770776	up-regulated		LINC02137	1.2749	0.179819	0.00947718	0.228306	up-regulated
AC015712.4	4.20225	2.30924	0.0211002	0.847787	up-regulated		AL356130.1	3.40428	1.04327	0.021575	0.770776	up-regulated		AC093496.1	1.11191	4.39137	0.00955607	0.229077	up-regulated
AC004012.1	3.52323	-0.671825	0.0213043	0.850427	up-regulated		AL136982.3	3.69848	-0.581637	0.0216908	0.770776	up-regulated		LINC01142	1.1639	-0.460696	0.0100537	0.23829	up-regulated
AC099520.2	2.0311	-0.490761	0.0213043	0.850427	up-regulated		AC034236.3	1.34777	0.0299912	0.0218018	0.770776	up-regulated		LINC02154	1.00494	-0.124513	0.0104105	0.243181	up-regulated
AL121987.1	3.09114	0.191844	0.0216688	0.85312	up-regulated		AC010643.1	1.81924	5.4219	0.0218279	0.770776	up-regulated		AC018697.1	1.69165	-1.04268	0.0105931	0.24545	up-regulated
LINC00269	2.6751	-0.925019	0.0217531	0.85312	up-regulated		LINC00937	1.92198	6.13995	0.02184	0.770776	up-regulated		AP002892.1	1.59977	-0.815225	0.0105946	0.24545	up-regulated
AIRN	3.56894	-0.641906	0.0218879	0.85312	up-regulated		LRRC2-AS1	2.53489	-0.0596955	0.0218629	0.770776	up-regulated		AL136322.1	1.37812	-0.868848	0.0106693	0.246387	up-regulated
AL512347.1	1.80857	-0.780772	0.0221403	0.858536	up-regulated		AL161630.1	5.86782	3.02461	0.0221294	0.774334	up-regulated		AL023802.1	1.15296	2.08172	0.010814	0.248867	up-regulated
AC125603.1	4.26282	-0.378165	0.0224093	0.864635	up-regulated		AL365199.1	3.47386	0.789283	0.022166	0.774334	up-regulated		AL157702.2	1.01508	3.07414	0.0108293	0.248867	up-regulated
AC003986.2	4.35741	0.445927	0.022447	0.864635	up-regulated		AC243836.1	2.91125	-0.62493	0.0224173	0.78075	up-regulated		AC005208.1	1.47119	-0.998837	0.0108355	0.248867	up-regulated
AP002754.2	2.62705	3.42341	0.0227336	0.873108	up-regulated		AC003101.1	2.36908	-0.805202	0.0226586	0.784652	up-regulated		AL627443.1	2.36854	-0.784422	0.0108532	0.248867	up-regulated
AC023794.5	2.40619	6.79974	0.0232514	0.882202	up-regulated		AP001267.4	3.43104	-0.668816	0.0226929	0.784652	up-regulated		MAPT-AS1	1.70022	0.471423	0.0109433	0.250226	up-regulated
AL035530.1	1.4839	-0.0192313	0.0232997	0.882202	up-regulated		AC121342.1	1.66213	1.11616	0.023126	0.791268	up-regulated		ZFPM2-AS1	1.69749	0.220694	0.0109882	0.250533	up-regulated
AC096996.2	1.91543	2.46306	0.0233387	0.882202	up-regulated		AC008897.2	3.99833	-0.469987	0.0231287	0.791268	up-regulated		AC026770.1	1.23488	-1.03714	0.0111215	0.251581	up-regulated
AC093001.1	2.49033	9.19815	0.0234913	0.88326	up-regulated		AL121574.1	1.55179	1.48545	0.0232694	0.791268	up-regulated		LINC02385	1.26839	6.15219	0.0111587	0.252026	up-regulated
AL161621.1	1.58094	-0.529838	0.0237555	0.884815	up-regulated		AC106771.1	5.44374	0.377603	0.0236632	0.800872	up-regulated		AC010745.3	1.08789	-1.09433	0.0112914	0.254623	up-regulated
LNX1-AS2	2.44594	3.63396	0.0237926	0.884815	up-regulated		AC007128.2	2.2248	0.339714	0.0240591	0.81236	up-regulated		AC009264.1	2.25343	1.3378	0.0113921	0.255548	up-regulated
AC137834.2	3.65172	-0.619497	0.0238632	0.884815	up-regulated		AC007091.1	3.50095	1.02067	0.0241221	0.812581	up-regulated		AL035401.1	1.28593	-0.315323	0.0115311	0.257605	up-regulated
AL031432.3	1.2413	2.32938	0.0241577	0.884815	up-regulated		AC011443.1	3.47302	-0.660972	0.0241894	0.812945	up-regulated		AL732372.1	1.32732	1.51115	0.0118501	0.263913	up-regulated
AC048337.1	2.71607	0.316014	0.0243483	0.884815	up-regulated		LINC02330	2.99558	0.391174	0.0243815	0.815889	up-regulated		LINC01264	1.30285	-0.0878679	0.012147	0.267787	up-regulated
AC020980.1	3.16909	5.91102	0.0244294	0.884815	up-regulated		AC096759.2	1.52337	-0.85261	0.0244899	0.815889	up-regulated		AC016868.1	1.32104	0.237028	0.0121836	0.267787	up-regulated
LINC01490	5.01432	0.020941	0.0244955	0.884815	up-regulated		AL031432.3	1.15645	2.3648	0.024549	0.815889	up-regulated		AP001046.1	1.59925	-0.678111	0.0122102	0.267787	up-regulated
AP001205.1	2.73019	-0.726682	0.0247401	0.888302	up-regulated		AC084809.2	1.27487	1.04155	0.0248343	0.81731	up-regulated		CU634019.6	1.5855	1.74809	0.0122705	0.2687	up-regulated
AL158069.1	1.8437	0.606634	0.0247534	0.888302	up-regulated		AL445190.1	1.80482	-0.76973	0.0248619	0.81731	up-regulated		AC036176.3	1.47248	-0.913669	0.0124221	0.270373	up-regulated
AL021368.1	2.27097	2.45243	0.02494	0.892739	up-regulated		AC093462.1	2.16992	3.05438	0.0248762	0.81731	up-regulated		AC023137.1	1.46594	0.221785	0.0134272	0.285343	up-regulated
AC135050.1	1.0738	5.12901	0.0253332	0.902257	up-regulated		AL356272.1	2.46931	1.18585	0.0249797	0.81731	up-regulated		AC099520.2	1.13699	0.235419	0.0138654	0.292066	up-regulated
AF254983.1	5.55799	0.395806	0.0255524	0.904102	up-regulated		AL355512.1	1.78899	0.190704	0.0250543	0.81731	up-regulated		AC009090.2	1.00724	-0.682524	0.0138911	0.292181	up-regulated
AC016257.1	2.06727	3.17594	0.0255764	0.904102	up-regulated		AL023806.1	1.6832	2.99026	0.0251716	0.81731	up-regulated		AP005121.2	1.32376	-0.412553	0.0139264	0.292496	up-regulated
MIR219A2	2.33753	-0.802891	0.0256782	0.905444	up-regulated		AC008115.2	1.69944	-0.28441	0.0253466	0.820713	up-regulated		AP005432.2	1.6203	3.127	0.0140664	0.294575	up-regulated
AC005899.8	1.89096	2.88816	0.0258065	0.907193	up-regulated		AC117498.1	1.86594	-1.04381	0.0256029	0.823875	up-regulated		AL157937.1	1.88481	-0.936231	0.0140871	0.294581	up-regulated
AC122707.1	2.19927	-0.730677	0.0258558	0.907193	up-regulated		AC002511.1	2.65904	6.44315	0.025838	0.829585	up-regulated		AC104472.1	1.22525	1.42024	0.0141298	0.295043	up-regulated
AC124312.2	1.36195	4.21194	0.0266678	0.931073	up-regulated		AC034213.1	3.64209	-0.609305	0.0260398	0.834201	up-regulated		AC020908.2	1.22532	-0.721475	0.0142309	0.296058	up-regulated
AC034236.3	1.27384	-0.0129237	0.0268462	0.934999	up-regulated		AC129102.1	3.53856	-0.645177	0.0261748	0.836664	up-regulated		AC026336.3	1.00515	2.66168	0.0142401	0.296058	up-regulated
AF067845.1	2.01182	0.961864	0.0270703	0.939731	up-regulated		AL590677.1	3.80683	-0.552426	0.0264124	0.842385	up-regulated		AC016831.1	1.87745	5.14185	0.0144695	0.299529	up-regulated
AC013391.3	2.96363	-0.820204	0.0279018	0.95391	up-regulated		AL137076.1	3.7708	-0.285535	0.0267007	0.848467	up-regulated		LINC00261	1.73848	5.96152	0.0147702	0.304439	up-regulated
AP000892.1	1.83425	2.14562	0.0280374	0.95391	up-regulated		AP005328.1	4.67352	-0.132779	0.02678	0.848467	up-regulated		AC055717.1	1.0839	-0.0807056	0.0150787	0.308282	up-regulated
AC022784.8	2.05381	-0.887066	0.0281365	0.95391	up-regulated		MIR2052HG	3.18177	5.04733	0.026931	0.850695	up-regulated		AL137786.1	1.44125	-0.408843	0.015607	0.313763	up-regulated
AP001107.6	1.10186	-0.201253	0.0281539	0.95391	up-regulated		AC106882.1	4.23998	-0.36391	0.0269686	0.850695	up-regulated		AC245519.1	1.02286	-0.359973	0.0161607	0.321858	up-regulated
AC092159.2	1.16675	2.2784	0.0285842	0.959033	up-regulated		LINC01402	1.72556	2.87025	0.0270767	0.851076	up-regulated		AC025465.3	1.01245	-0.438625	0.0165248	0.325674	up-regulated
RNF144A-AS1	1.36242	5.55136	0.0286188	0.959033	up-regulated		AC093904.2	4.04393	0.145896	0.027099	0.851076	up-regulated		AC015813.3	1.6676	-0.251593	0.0165927	0.325674	up-regulated
AC097059.2	3.33318	-0.718897	0.0289385	0.964192	up-regulated		AC243967.2	3.67291	-0.601287	0.027225	0.852949	up-regulated		AL133343.1	1.0839	-1.17963	0.0169382	0.330216	up-regulated
AC020892.2	3.62841	-0.636388	0.0291287	0.96516	up-regulated		AC010894.3	5.56766	2.63962	0.0273366	0.852949	up-regulated		AGBL1-AS1	1.94656	1.27939	0.0169748	0.330216	up-regulated
AL133467.1	1.93047	0.734102	0.0291421	0.96516	up-regulated		AL449043.1	4.77993	-0.066815	0.0275584	0.856156	up-regulated		LAMP5-AS1	1.28647	1.03417	0.0178753	0.340624	up-regulated
AP000897.2	1.54294	1.50545	0.0292583	0.966309	up-regulated		AC107419.1	2.44228	1.75218	0.0277533	0.857043	up-regulated		AC108463.3	1.20336	-0.0917734	0.018459	0.348525	up-regulated
AP005131.3	2.28434	-0.0446277	0.0297972	0.969931	up-regulated		LINC01489	1.69679	2.19516	0.0277657	0.857043	up-regulated		AP002008.3	1.25077	-0.549145	0.0186257	0.348525	up-regulated
AC124069.1	3.31093	-0.732968	0.0298335	0.969931	up-regulated		AC007731.1	2.75736	0.0749111	0.027833	0.85728	up-regulated		LINC02300	1.63587	-0.033953	0.0191867	0.354351	up-regulated
AC093462.1	2.26434	2.84743	0.0300378	0.973242	up-regulated		AP003064.1	5.91885	0.822504	0.0282413	0.866148	up-regulated		AC011287.2	1.69132	-0.746677	0.0200582	0.366036	up-regulated
LINC02430	5.98557	0.71431	0.0301426	0.973242	up-regulated		AC011247.2	1.08266	1.60599	0.0284598	0.869663	up-regulated		AP001547.1	1.93271	-0.805416	0.0203193	0.368642	up-regulated
AC006116.9	1.09307	1.70631	0.0303011	0.973242	up-regulated		AC009468.1	2.54526	2.84209	0.0284769	0.869663	up-regulated		AC064834.1	1.61315	1.46801	0.020381	0.36888	up-regulated
LINC02267	2.96725	-0.667954	0.0303591	0.973242	up-regulated		AL161752.1	3.42578	0.925187	0.0289051	0.873467	up-regulated		LINC01198	1.28693	2.49934	0.0203837	0.36888	up-regulated
AC016396.1	2.16559	0.360794	0.030383	0.973242	up-regulated		AC079313.2	1.58798	2.05797	0.0295877	0.888595	up-regulated		GRK5-IT1	1.43046	-0.831321	0.0204599	0.369331	up-regulated
AL713965.1	3.42449	2.7255	0.0304764	0.973242	up-regulated		AL356289.1	2.00584	1.4534	0.0297118	0.888595	up-regulated		AC027309.1	1.1364	-0.907103	0.0205344	0.369938	up-regulated
LRRC3-AS1	1.07897	2.22489	0.0304846	0.973242	up-regulated		AP000943.2	4.45327	-0.256655	0.0298927	0.888595	up-regulated		AC015722.2	1.45017	0.636631	0.020816	0.373511	up-regulated
AC022973.2	2.99686	-0.806158	0.0305769	0.973993	up-regulated		LINC01234	3.73394	0.820502	0.0299118	0.888595	up-regulated		AC097532.2	1.44069	-0.149152	0.0208221	0.373511	up-regulated
LINC02362	1.27419	2.13778	0.0309806	0.982438	up-regulated		LINC00520	3.47693	-0.670972	0.0299579	0.888595	up-regulated		C3orf56	1.42144	-1.10111	0.0208472	0.373511	up-regulated
F11-AS1	4.04723	2.57954	0.0314802	0.993835	up-regulated		AC010632.2	3.40923	0.060691	0.0299617	0.888595	up-regulated		LINC01959	1.11207	-1.17792	0.0213916	0.378085	up-regulated
AC104350.1	3.71202	-0.610531	0.0316693	0.997583	up-regulated		AC138466.1	2.05214	0.885008	0.030028	0.88873	up-regulated		AC104002.3	1.13166	2.33367	0.0216459	0.380451	up-regulated
AC104996.1	2.188	0.901868	0.0319982	1	up-regulated		AC092447.4	1.98897	-0.380548	0.0304792	0.898351	up-regulated		AL365226.2	1.94651	5.17895	0.021714	0.38051	up-regulated
AL157700.1	1.6185	5.72431	0.032033	1	up-regulated		Z97200.1	1.58943	1.59745	0.0305004	0.898351	up-regulated		AC134312.4	1.46085	-0.753789	0.0217451	0.380511	up-regulated
AC108025.2	1.71875	0.502672	0.0321497	1	up-regulated		AC007365.1	1.0603	3.11213	0.030584	0.898351	up-regulated		LINC00592	1.66924	0.686342	0.0217726	0.380511	up-regulated
AC020928.2	2.55059	-0.773779	0.0321954	1	up-regulated		AC090260.1	1.62956	5.11343	0.0306995	0.898351	up-regulated		AC012363.2	1.25315	-0.169137	0.0218408	0.380511	up-regulated
AC117498.2	1.02159	4.67954	0.0324324	1	up-regulated		ARHGAP31-AS1	1.7751	3.64636	0.0308002	0.898351	up-regulated		AC145141.1	1.23871	-1.17262	0.0220984	0.383973	up-regulated
KRT73-AS1	3.43779	-0.697754	0.0329024	1	up-regulated		AC022872.1	2.25856	2.47813	0.0308765	0.898351	up-regulated		AC017074.1	1.61299	4.25372	0.0222285	0.384764	up-regulated
AC093849.1	2.55645	-0.212615	0.0329799	1	up-regulated		AC004080.6	3.27601	-0.732078	0.0311809	0.904246	up-regulated		AC007405.2	1.45699	-0.299363	0.0225328	0.388704	up-regulated
AL049637.1	3.26393	-0.743155	0.0331476	1	up-regulated		AC064875.1	2.33581	5.82868	0.0313748	0.906858	up-regulated		AC018445.1	1.43116	-0.0424194	0.0229406	0.393922	up-regulated
AC022447.2	3.24404	-0.752431	0.0331702	1	up-regulated		AC106801.1	3.46524	-0.677088	0.0313971	0.906858	up-regulated		AC090136.3	1.49919	-0.128397	0.0230856	0.393989	up-regulated
AL109763.1	4.14288	-0.163327	0.0331803	1	up-regulated		BMS1P14	2.58898	1.31014	0.0316458	0.909394	up-regulated		AC007608.2	1.15597	0.310031	0.0232971	0.396658	up-regulated
AC105105.1	2.43339	-0.807876	0.0331865	1	up-regulated		AC243972.1	3.60155	-0.634057	0.0317906	0.910907	up-regulated		AL365434.2	1.71368	-0.888818	0.0237615	0.401482	up-regulated
LINC01751	2.19102	1.85517	0.0333132	1	up-regulated		AC073324.2	2.22145	2.47955	0.0318709	0.911394	up-regulated		MUC2	1.0464	6.77172	0.0240803	0.405672	up-regulated
AL023806.1	1.70651	2.76919	0.0334118	1	up-regulated		AC003986.2	4.09379	0.379204	0.0320576	0.914914	up-regulated		AC009101.1	1.515	-0.927489	0.0241793	0.406388	up-regulated
LINC02280	1.79102	0.0865812	0.0336606	1	up-regulated		C17orf77	4.83681	1.85808	0.0322766	0.917376	up-regulated		LINC02025	1.24983	-1.17359	0.0242513	0.406582	up-regulated
AC244035.2	3.85586	-0.559509	0.0339464	1	up-regulated		AC007496.1	2.86	-0.00131636	0.0323352	0.917376	up-regulated		AL390964.1	1.27958	-0.698856	0.0242757	0.406582	up-regulated
AC009133.3	5.01798	5.91528	0.0340172	1	up-regulated		AL353593.1	1.84075	4.40713	0.032416	0.917859	up-regulated		AC103810.2	1.31282	1.41769	0.024378	0.407409	up-regulated
BMS1P14	2.99523	1.63134	0.0341102	1	up-regulated		AL158070.1	1.99037	0.429242	0.0325905	0.920986	up-regulated		LINC02432	1.22842	0.524567	0.025452	0.418011	up-regulated
AL109807.1	2.01456	-0.937532	0.0341225	1	up-regulated		AL078645.1	3.85541	0.155019	0.0328552	0.926646	up-regulated		AC087501.3	1.02742	-0.172179	0.0255661	0.419221	up-regulated
AC103808.3	3.91437	1.25061	0.0341678	1	up-regulated		AL358613.1	2.1873	1.33298	0.0329745	0.927875	up-regulated		AC126323.6	1.06139	-1.19017	0.0257939	0.420875	up-regulated
AC138207.1	3.19501	-0.764093	0.0342944	1	up-regulated		AL355076.2	3.75626	-0.580132	0.033038	0.927875	up-regulated		AC104002.2	1.45221	-0.719944	0.025876	0.421129	up-regulated
AP005230.1	5.0293	1.05397	0.0343288	1	up-regulated		AC104794.2	1.11625	6.72299	0.0331682	0.927875	up-regulated		AC093831.1	1.43772	-1.16081	0.0262891	0.424365	up-regulated
AC025754.2	1.79123	0.263347	0.0343418	1	up-regulated		AC027343.3	4.92546	0.791752	0.0333132	0.927875	up-regulated		AL645608.9	1.0793	0.776453	0.0263654	0.424365	up-regulated
AL158828.1	2.84489	1.86017	0.0343727	1	up-regulated		AC130462.1	1.18994	0.205746	0.0333503	0.927875	up-regulated		AL390835.1	1.03225	-0.748642	0.0263698	0.424365	up-regulated
AL355810.1	4.17173	1.02565	0.0344074	1	up-regulated		AC113137.1	3.03538	-0.618023	0.0336597	0.934674	up-regulated		WWOX-AS1	1.10897	-1.13943	0.0264378	0.424554	up-regulated
AC079384.1	3.67814	-0.627691	0.0346402	1	up-regulated		AL162413.1	3.1447	2.45201	0.0342432	0.941787	up-regulated		AL161719.1	1.29589	1.82167	0.0264707	0.424554	up-regulated
AP001636.3	1.19951	8.45324	0.034741	1	up-regulated		C9orf163	1.3499	4.31109	0.034454	0.945775	up-regulated		AC005993.1	1.90223	-0.750911	0.0264996	0.424554	up-regulated
AC084809.1	1.13173	3.03569	0.0349864	1	up-regulated		LINC02010	3.11835	0.0944199	0.0346691	0.947358	up-regulated		AC023796.1	1.63794	-0.976369	0.0265293	0.424558	up-regulated
AC018358.1	1.43991	1.81555	0.0357702	1	up-regulated		AC004012.1	3.27371	-0.738367	0.0347514	0.947358	up-regulated		SORCS3-AS1	2.09484	-0.381188	0.0266095	0.424895	up-regulated
AC106801.1	3.35029	-0.722364	0.0358373	1	up-regulated		AC023301.1	3.2731	4.2978	0.0348666	0.947358	up-regulated		AC025277.1	1.13539	-1.12574	0.0266801	0.42555	up-regulated
AC007848.1	4.05067	2.11549	0.0359102	1	up-regulated		AC010247.1	1.26557	1.24261	0.0349374	0.947358	up-regulated		AC104237.3	1.41243	-0.116408	0.0268092	0.427079	up-regulated
AC117383.1	3.90377	0.117323	0.0359178	1	up-regulated		AL122017.1	3.73059	-0.591488	0.0349379	0.947358	up-regulated		AC073133.1	1.45784	4.86762	0.0271113	0.428626	up-regulated
AC005899.6	1.1529	3.03684	0.0361707	1	up-regulated		AC022733.2	2.77975	1.03358	0.0349727	0.947358	up-regulated		AC022441.2	1.33757	-1.02265	0.0271953	0.429482	up-regulated
AC004080.4	4.7386	1.9514	0.036197	1	up-regulated		SGO1-AS1	1.29801	-0.40783	0.0354811	0.9575	up-regulated		PITPNM2-AS1	1.4831	-0.723351	0.0273402	0.430244	up-regulated
AP001630.1	1.24272	1.30006	0.0365443	1	up-regulated		AC011369.1	5.59588	0.476498	0.0355468	0.9575	up-regulated		LINC01581	1.78405	-0.26852	0.0276767	0.43342	up-regulated
C17orf77	4.51191	1.38788	0.036698	1	up-regulated		AC012676.3	1.60999	4.1241	0.0358407	0.958529	up-regulated		LINC01497	1.42619	0.798792	0.0279693	0.435828	up-regulated
AC011478.1	1.85575	-0.855466	0.0369349	1	up-regulated		AL355674.1	2.64426	1.33094	0.0358516	0.958529	up-regulated		AL121721.1	1.49339	-0.766396	0.0281117	0.435828	up-regulated
SMCR2	2.12233	0.562029	0.0370214	1	up-regulated		AP001775.2	3.26115	0.964487	0.0363353	0.959274	up-regulated		AC125611.4	1.01665	0.652717	0.0282725	0.435828	up-regulated
AC134772.1	3.8251	0.0757566	0.0372177	1	up-regulated		LINC01115	3.18851	1.51548	0.0364386	0.959274	up-regulated		LINC01612	1.80825	1.94651	0.0283408	0.436085	up-regulated
AL035420.3	2.85751	1.82748	0.0373904	1	up-regulated		EWSAT1	1.14496	3.38524	0.0366063	0.959274	up-regulated		LINC01443	1.77038	4.37248	0.0284994	0.437589	up-regulated
AC132807.2	4.0318	-0.0138307	0.0373908	1	up-regulated		AC018358.1	1.41637	1.80767	0.0366853	0.959274	up-regulated		AC243967.2	1.45389	-0.59941	0.0286182	0.438477	up-regulated
FAM30A	1.42346	3.35352	0.0374222	1	up-regulated		MORC2-AS1	1.94362	2.84369	0.0369034	0.959274	up-regulated		GACAT2	1.53235	1.65331	0.0287246	0.439171	up-regulated
AC008894.1	1.7823	-0.846438	0.0376262	1	up-regulated		AC005823.2	1.44661	-0.714938	0.0369143	0.959274	up-regulated		AC011507.1	1.73429	-0.987768	0.0287968	0.439735	up-regulated
AL445433.2	1.89078	0.459491	0.0377591	1	up-regulated		AL139350.1	2.27302	0.139974	0.0369268	0.959274	up-regulated		AL136987.1	1.32671	-0.299365	0.0288531	0.439735	up-regulated
AL138781.2	1.4344	3.66382	0.0379232	1	up-regulated		LINC02148	1.11305	1.01504	0.0370034	0.959274	up-regulated		KF456478.1	1.28415	-1.19758	0.0303484	0.45199	up-regulated
LINC01446	2.56896	1.91399	0.0379743	1	up-regulated		LINC02100	3.77758	0.103449	0.0370567	0.959274	up-regulated		AL360089.1	1.49232	-0.665117	0.0303999	0.45229	up-regulated
LINC02412	1.05187	3.61737	0.0380745	1	up-regulated		LINC01443	5.14131	4.58747	0.0370657	0.959274	up-regulated		LL22NC01-81G9.3	1.22761	-0.99563	0.0305666	0.453569	up-regulated
AC007598.2	2.22894	-0.682038	0.0382076	1	up-regulated		LINC01564	2.9974	1.32943	0.0371089	0.959274	up-regulated		FAM3D-AS1	1.27584	0.798766	0.0305805	0.453569	up-regulated
FAM230C	4.31352	0.201338	0.0382825	1	up-regulated		AC092078.2	2.65525	-0.204945	0.0373766	0.959274	up-regulated		AC078950.1	1.69644	-0.254152	0.0316109	0.463122	up-regulated
LINC02285	2.23961	7.87897	0.0383738	1	up-regulated		AL390964.1	2.86552	-0.705345	0.03747	0.959274	up-regulated		LINC02197	1.59012	2.50032	0.0317213	0.463406	up-regulated
AC005823.2	1.65052	-0.529546	0.0385009	1	up-regulated		AC012173.1	2.9106	0.511184	0.0375687	0.959274	up-regulated		AC084398.2	1.34792	-0.763937	0.0320793	0.464397	up-regulated
LINC00536	3.90989	-0.542695	0.0385527	1	up-regulated		AC108868.1	2.23871	0.805311	0.0376252	0.959274	up-regulated		LINC02140	1.48942	-0.808054	0.0328106	0.468265	up-regulated
AL135925.1	1.03589	6.79294	0.038574	1	up-regulated		AL360089.1	3.53299	-0.665774	0.037695	0.959274	up-regulated		AC127024.3	1.31293	-0.238038	0.0332972	0.472259	up-regulated
AC017002.1	2.6431	-0.770126	0.0386142	1	up-regulated		LINC00536	3.56945	-0.652288	0.0378828	0.959274	up-regulated		CAMTA1-IT1	1.61917	-0.56086	0.0333178	0.472259	up-regulated
DIP2A-IT1	1.51939	1.63389	0.0386833	1	up-regulated		AL049637.1	3.19117	-0.761786	0.0379468	0.959274	up-regulated		AL049870.3	1.16618	1.91016	0.0334687	0.472906	up-regulated
AL161782.1	4.63968	1.49075	0.0387374	1	up-regulated		LINC01777	2.39253	-0.262608	0.0381811	0.962663	up-regulated		AC005906.2	1.27381	-1.06471	0.0335278	0.472906	up-regulated
AL138999.1	1.24859	1.61485	0.0388479	1	up-regulated		AC025016.1	2.57951	-0.116209	0.0384796	0.964269	up-regulated		AL049836.2	1.37535	-0.910539	0.0337268	0.474783	up-regulated
LINC02217	2.97231	-0.822349	0.0390017	1	up-regulated		LINC01939	2.74116	-0.739752	0.0387389	0.967396	up-regulated		AC005899.4	1.17163	-1.21684	0.034363	0.480743	up-regulated
AL611929.1	1.99053	-0.538715	0.0390199	1	up-regulated		AC073864.1	1.81867	-0.533962	0.0389321	0.968856	up-regulated		AC013652.2	1.30309	-0.94531	0.0343927	0.480743	up-regulated
AC009229.3	2.00566	0.533529	0.0390475	1	up-regulated		AC010524.1	1.57747	0.190679	0.0391052	0.969809	up-regulated		AC007953.1	1.52175	0.8638	0.0345363	0.481001	up-regulated
AC068075.1	4.1288	2.00258	0.0390733	1	up-regulated		TTC39C-AS1	2.36067	1.75548	0.0392004	0.970497	up-regulated		AC097173.2	1.43268	0.79905	0.0348184	0.482127	up-regulated
AC010247.1	1.45006	1.28704	0.0390875	1	up-regulated		AC244517.2	2.75782	2.00162	0.0394459	0.971291	up-regulated		AL161733.1	1.34667	-1.06213	0.0351108	0.484314	up-regulated
DSCAM-AS1	3.35167	7.54186	0.0391071	1	up-regulated		CAMTA1-IT1	3.8712	-0.542295	0.0395701	0.971291	up-regulated		AC073352.2	1.52796	-0.83847	0.0353975	0.48482	up-regulated
AC090260.1	1.66054	5.13829	0.0391689	1	up-regulated		AC010538.1	1.10753	1.94107	0.0402411	0.976963	up-regulated		L34079.2	1.44752	-0.321785	0.0354471	0.48482	up-regulated
AC004543.1	2.12488	0.650142	0.0392469	1	up-regulated		AC245014.1	1.61487	1.26392	0.0402907	0.976963	up-regulated		AC090099.4	1.30439	-1.07347	0.0356541	0.486214	up-regulated
AL669831.3	2.98785	-0.817905	0.0395717	1	up-regulated		AL356056.2	1.28708	2.08161	0.0403288	0.976963	up-regulated		LINC02403	1.10568	-0.817661	0.0360679	0.488833	up-regulated
AL365277.2	3.13907	2.94015	0.039621	1	up-regulated		AC092801.1	2.00712	-0.0622387	0.040523	0.976963	up-regulated		BHLHE40-AS1	1.53862	5.34322	0.0373925	0.501367	up-regulated
AL035588.1	1.92694	-0.675305	0.0396963	1	up-regulated		AC018653.1	2.71656	-0.871386	0.0407	0.976963	up-regulated		AP001596.1	1.19392	0.0789909	0.0376554	0.503952	up-regulated
AC104088.1	2.61809	0.776893	0.0397091	1	up-regulated		LINC00993	5.55704	3.86987	0.0410164	0.976963	up-regulated		AC018558.2	1.74272	-0.779437	0.0378269	0.504825	up-regulated
AC099509.1	4.24813	-0.39037	0.0397117	1	up-regulated		AC007848.1	4.1046	2.43743	0.0410507	0.976963	up-regulated		AC239800.3	1.1257	-0.891407	0.0381071	0.507167	up-regulated
AC093423.2	1.10388	1.05065	0.0398058	1	up-regulated		AC084398.2	3.12277	-0.784286	0.0410831	0.976963	up-regulated		LINC02103	1.7388	0.187854	0.0383641	0.509174	up-regulated
AC092801.1	1.94128	-0.11221	0.0400146	1	up-regulated		AC023300.1	1.86136	-1.04557	0.0412658	0.976963	up-regulated		LINC01566	1.0266	-0.0786108	0.0386589	0.5112	up-regulated
LINC02047	1.67193	-0.478363	0.0401043	1	up-regulated		AL355102.1	3.09048	-0.793252	0.0412851	0.976963	up-regulated		AC078852.1	1.02223	0.233299	0.0388534	0.512829	up-regulated
AC092316.1	4.11717	-0.0926644	0.0401424	1	up-regulated		AP003174.2	1.29359	-0.779735	0.0414679	0.979433	up-regulated		LL22NC03-63E9.3	1.03375	6.30784	0.0394448	0.518008	up-regulated
LINC02027	1.59536	0.71624	0.0403011	1	up-regulated		AC244035.2	3.87611	-0.542198	0.0415992	0.980923	up-regulated		AC020907.3	1.27981	0.281025	0.0395071	0.518008	up-regulated
AC007450.1	2.12706	3.41322	0.0403684	1	up-regulated		AL355870.1	1.75956	0.137639	0.0416907	0.981472	up-regulated		LINC01708	1.01258	-1.13947	0.0397252	0.519098	up-regulated
MEG8	1.81789	3.30718	0.0405602	1	up-regulated		AC007952.4	1.12481	1.14401	0.0421459	0.984175	up-regulated		AL451060.1	1.08704	0.170579	0.0402024	0.522014	up-regulated
PLCG1-AS1	1.02726	2.704	0.040711	1	up-regulated		AL357060.2	3.44301	-0.715002	0.0421476	0.984175	up-regulated		ST7-AS2	1.51773	0.919885	0.0404234	0.523356	up-regulated
AC073878.1	3.26418	0.838353	0.0408824	1	up-regulated		AL117382.1	2.52706	-0.798151	0.0422522	0.985017	up-regulated		LINC02038	1.39547	0.312955	0.0407777	0.525688	up-regulated
AC025171.3	1.51197	4.31458	0.0411268	1	up-regulated		AC090044.1	2.86152	9.67394	0.0429281	0.994329	up-regulated		AC051619.4	1.14122	0.112747	0.0410596	0.527904	up-regulated
AC002463.1	3.55587	0.991249	0.0411844	1	up-regulated		AL450344.3	3.22252	-0.762314	0.0430849	0.994757	up-regulated		AC026523.1	1.57961	-0.721477	0.0415606	0.53093	up-regulated
LINC01887	3.03578	-0.638988	0.0414039	1	up-regulated		AC022148.2	1.26204	2.05081	0.0434839	0.997289	up-regulated		AC025265.2	1.48643	-0.581627	0.04199	0.534138	up-regulated
AC110491.2	2.08722	2.06957	0.0414501	1	up-regulated		AC022447.2	2.95428	-0.832931	0.0436833	0.997289	up-regulated		AC073525.1	1.52061	5.04423	0.0434234	0.541363	up-regulated
AC092131.1	3.27194	-0.282265	0.0415223	1	up-regulated		AC140125.2	1.16702	1.20142	0.0438605	0.997289	up-regulated		AC026780.2	1.19073	0.0397812	0.0436744	0.542612	up-regulated
AL035078.3	1.8787	1.20998	0.0415344	1	up-regulated		AC105411.1	1.75867	7.83775	0.0439174	0.997289	up-regulated		AP005131.7	1.21223	2.74499	0.0443066	0.546689	up-regulated
LINC02421	1.78221	0.704779	0.0416064	1	up-regulated		LINC02371	2.80448	-0.289437	0.0439577	0.997289	up-regulated		AL121796.1	1.45099	1.45608	0.0448027	0.551392	up-regulated
AC106738.1	2.05406	1.18203	0.0418459	1	up-regulated		LINC00514	1.74075	1.63368	0.0440805	0.997289	up-regulated		AL583824.1	1.32372	-0.677826	0.0454882	0.55555	up-regulated
AC093915.1	2.99248	-0.824507	0.0418572	1	up-regulated		AC117383.1	3.73377	0.0874012	0.044496	0.998402	up-regulated		B3GALT5-AS1	1.23753	2.18187	0.0459543	0.558871	up-regulated
AP003170.4	2.43928	-0.182013	0.0421056	1	up-regulated		AC004080.4	4.48998	1.94936	0.0445739	0.998402	up-regulated		AL135746.1	1.19544	-1.04433	0.0465969	0.5643	up-regulated
AL133342.1	2.91408	0.617085	0.0422299	1	up-regulated		AP001007.3	2.52094	-0.833766	0.0446224	0.998402	up-regulated		AC007406.2	1.35448	-0.923062	0.0470696	0.566213	up-regulated
AC026369.3	3.0147	1.83456	0.0422403	1	up-regulated		AC008738.6	3.34199	-0.733032	0.044631	0.998402	up-regulated		LINC01844	1.2041	0.632751	0.0473051	0.567096	up-regulated
AC026474.1	1.67041	0.0240063	0.0422634	1	up-regulated		LINC00167	1.4725	2.65068	0.0448043	1	up-regulated		AC104794.3	1.02403	-1.03271	0.0485705	0.574657	up-regulated
AC022148.2	1.21422	1.98894	0.0427136	1	up-regulated		AC137767.1	1.75093	5.5762	0.0449349	1	up-regulated		AL161668.3	1.00986	0.571558	0.0487456	0.57531	up-regulated
AC025016.1	2.84666	0.00984507	0.0429818	1	up-regulated		LINC01556	3.17475	1.31579	0.04548	1	up-regulated		AC107959.2	1.22974	-0.233693	0.0490809	0.575717	up-regulated
LINC01366	1.422	2.94274	0.0431276	1	up-regulated		AL713965.1	2.89004	2.28794	0.0456477	1	up-regulated		AL049830.3	1.2084	2.2847	0.0491785	0.575717	up-regulated
AC092295.1	2.57693	-0.269824	0.0433366	1	up-regulated		AC087284.1	1.17536	0.497502	0.0456807	1	up-regulated		AC113192.4	1.37899	0.559985	0.0495301	0.579341	up-regulated
AC087258.1	6.65588	2.65074	0.04341	1	up-regulated		MIR219A2	1.95224	-0.922345	0.0464852	1	up-regulated		AC090772.1	-4.25163	2.16172	2.27672e-70	3.27551e-66	down-regulated
AC025822.1	2.975	-0.297092	0.043524	1	up-regulated		AP002759.1	3.62398	-0.641349	0.046611	1	up-regulated		AC090371.2	-3.88608	1.30734	3.1813e-60	2.28847e-56	down-regulated
AC123768.3	1.00398	1.9833	0.0435767	1	up-regulated		AL138876.1	3.1918	-0.775645	0.0473075	1	up-regulated		LINC01020	-4.86375	0.0966064	6.09312e-57	2.92206e-53	down-regulated
PCGEM1	1.58041	9.92173	0.043813	1	up-regulated		AC246787.2	3.87131	-0.549071	0.0473865	1	up-regulated		LINC01709	-4.91514	4.74405	1.22218e-55	4.39587e-52	down-regulated
AC090206.1	1.61695	3.19048	0.043826	1	up-regulated		AC005999.1	1.14773	4.73038	0.0475282	1	up-regulated		LINC00400	-4.78463	-0.560858	1.16669e-47	3.35705e-44	down-regulated
AC007365.1	1.18581	3.12208	0.0438838	1	up-regulated		AP003170.4	2.46104	-0.121917	0.0479622	1	up-regulated		AC105343.1	-4.89588	-0.666504	1.03632e-44	2.48491e-41	down-regulated
AC118755.2	1.55076	1.19105	0.0438971	1	up-regulated		CACNA1C-IT2	2.86786	-0.120366	0.0480506	1	up-regulated		AC087258.1	-5.47749	0.517071	8.96939e-35	1.84347e-31	down-regulated
AL158070.1	1.83588	0.27847	0.0441253	1	up-regulated		AP000851.1	4.41437	4.06168	0.0480824	1	up-regulated		AC005256.1	-4.44141	-0.76221	7.78747e-30	1.40048e-26	down-regulated
LIPC-AS1	1.47666	0.12996	0.0441982	1	up-regulated		AP002761.1	3.09565	-0.801047	0.0481954	1	up-regulated		AL445248.1	-2.40987	3.18362	1.07716e-23	1.7219e-20	down-regulated
AC106882.1	3.22352	-0.76343	0.0443937	1	up-regulated		LINC01366	1.20048	2.7382	0.0484215	1	up-regulated		AC010768.4	-2.45804	-0.282112	2.52605e-23	3.63424e-20	down-regulated
AL356272.1	2.3664	0.991671	0.0446175	1	up-regulated		AC113192.4	4.40993	0.68248	0.0486094	1	up-regulated		LINC02430	-5.18678	-0.708066	8.52662e-23	1.1152e-19	down-regulated
AL117328.2	1.96114	3.30008	0.0449096	1	up-regulated		AC007250.1	2.64926	-0.773476	0.0487055	1	up-regulated		AC022424.2	-2.96813	0.0718468	2.6316e-21	3.15507e-18	down-regulated
AC048382.1	1.09328	2.94224	0.0449537	1	up-regulated		AC002558.2	3.15287	-0.788375	0.0487721	1	up-regulated		AC008592.2	-3.14188	-0.826527	5.78862e-21	6.40622e-18	down-regulated
AC106772.1	1.35597	1.87785	0.0451516	1	up-regulated		AL050331.3	1.07282	2.68704	0.0488248	1	up-regulated		AC079062.1	-2.94403	4.07092	3.54397e-20	3.64194e-17	down-regulated
LLPH-AS1	1.13833	3.13975	0.0451773	1	up-regulated		AC007001.1	2.96258	1.10748	0.0489346	1	up-regulated		AL390718.1	-3.00206	1.689	3.97627e-20	3.81377e-17	down-regulated
AL391807.1	1.44375	1.70366	0.0452473	1	up-regulated		LINC00261	3.93265	6.20034	0.0489734	1	up-regulated		LINC01428	-2.30133	1.13696	4.56185e-19	4.10196e-16	down-regulated
AC138781.1	1.8925	-0.964682	0.0454467	1	up-regulated		AC016868.1	2.06857	0.326723	0.0490624	1	up-regulated		AC092316.1	-3.68523	-0.945304	1.3653e-18	1.15544e-15	down-regulated
PSMD6-AS1	3.34625	3.20715	0.045486	1	up-regulated		AC023824.4	7.13147	3.47511	0.0492787	1	up-regulated		AC104809.2	-2.40081	1.02737	2.05419e-18	1.64187e-15	down-regulated
AP001007.3	1.83685	-0.941435	0.0456242	1	up-regulated		AC016257.1	1.79878	3.0857	0.049512	1	up-regulated		AL109763.1	-3.87783	-0.990208	1.66497e-14	1.26073e-11	down-regulated
AC126175.1	3.67077	0.182344	0.0458851	1	up-regulated		AL391813.2	2.52487	1.64546	0.0495172	1	up-regulated		AC093893.2	-3.36259	-1.17389	1.49358e-13	1.07441e-10	down-regulated
LINC01667	4.17242	0.105563	0.0458936	1	up-regulated		AC134312.1	1.51457	0.989036	0.0497028	1	up-regulated		BX284668.2	-1.47856	2.20193	2.24471e-13	1.53784e-10	down-regulated
ATP13A5-AS1	2.32453	-0.91566	0.0469888	1	up-regulated		OVCH1-AS1	3.94344	1.07288	0.0499854	1	up-regulated		MACC1-AS1	-1.87244	0.284185	2.96155e-13	1.93672e-10	down-regulated
AC007922.3	1.64111	-0.0607453	0.0471537	1	up-regulated		LINC01143	2.74361	0.629392	0.0499884	1	up-regulated		AC097487.1	-2.06919	-1.07923	5.09686e-13	3.1882e-10	down-regulated
HPVC1	1.42431	0.690979	0.0474187	1	up-regulated		AC002470.1	-6.63089	8.28213	8.80242e-219	1.26614e-214	down-regulated		AC114912.1	-2.3149	-0.979373	1.74171e-12	1.04408e-09	down-regulated
AL162391.1	1.88204	-0.987539	0.0478898	1	up-regulated		AC018943.1	-5.26796	0.17684	6.56565e-61	4.72201e-57	down-regulated		AC027779.2	-1.53939	-1.02209	1.82961e-12	1.0529e-09	down-regulated
AC026782.2	1.44472	-0.644529	0.0479578	1	up-regulated		AC082650.1	-5.2151	-1.04825	1.99769e-34	9.57826e-31	down-regulated		AL772202.1	-3.45865	-0.949401	2.64577e-12	1.46403e-09	down-regulated
AC084768.1	2.53606	-0.840383	0.0485366	1	up-regulated		LPP-AS1	-7.45804	-0.697534	2.85616e-31	1.02708e-27	down-regulated		AC091987.1	-2.05803	-0.0238463	3.76702e-12	2.00726e-09	down-regulated
AC006001.2	2.19838	4.70236	0.0485724	1	up-regulated		MED4-AS1	-4.05662	4.80195	8.62024e-29	2.47987e-25	down-regulated		AL138830.2	-1.96914	-1.04959	4.56522e-12	2.34571e-09	down-regulated
AL139317.1	1.67299	-0.791925	0.0485927	1	up-regulated		AF064860.1	-5.88522	-0.395328	2.25758e-26	5.41218e-23	down-regulated		AC090809.1	-2.52062	-0.83036	4.93105e-12	2.44631e-09	down-regulated
LINC00272	3.74623	0.0260863	0.0487221	1	up-regulated		AF064860.2	-3.56332	2.50359	3.37535e-20	6.93586e-17	down-regulated		AC013472.2	-3.68152	-1.02082	2.3018e-11	1.06826e-08	down-regulated
AC104561.1	3.28432	2.63299	0.048807	1	up-regulated		LINC01660	-5.28827	-1.1912	1.10968e-19	1.9952e-16	down-regulated		AC007001.1	-2.50342	1.61283	2.95761e-11	1.29633e-08	down-regulated
AC245014.1	1.60148	1.13833	0.0489188	1	up-regulated		AL360181.1	-2.97421	2.54744	1.73256e-18	2.76902e-15	down-regulated		AL356414.1	-3.24705	-1.12159	2.97345e-11	1.29633e-08	down-regulated
AL356056.2	1.2332	1.89689	0.0489649	1	up-regulated		AC007223.1	-4.25484	-1.30469	5.01448e-18	7.21283e-15	down-regulated		AC010595.1	-2.66856	-0.347098	7.2422e-11	3.06451e-08	down-regulated
AC091917.1	1.96417	-0.909555	0.0491878	1	up-regulated		LINC01709	-4.07147	3.01618	5.38903e-17	7.0469e-14	down-regulated		AP003900.1	-3.46934	-1.03371	8.94864e-11	3.6784e-08	down-regulated
AC007250.1	2.45341	-0.813516	0.0492656	1	up-regulated		AC025946.1	-2.87476	-1.20126	1.27502e-11	1.52832e-08	down-regulated		LINC01793	-1.76091	-0.682316	1.47602e-10	5.89877e-08	down-regulated
AC105411.1	1.79088	7.87989	0.0496153	1	up-regulated		AC016597.1	-2.89011	4.30319	4.89984e-11	5.42148e-08	down-regulated		AL355310.2	-1.92571	-1.16763	1.73537e-10	6.5702e-08	down-regulated
AP003064.2	1.96883	4.18839	0.0499399	1	up-regulated		AC116634.1	-3.40438	2.97841	1.26509e-10	1.29979e-07	down-regulated		AP001007.2	-1.35983	0.173761	3.85475e-10	1.42201e-07	down-regulated
AC002470.1	-6.22664	10.6842	1.69778e-26	2.4066e-22	down-regulated		LINC00311	-2.30849	0.439286	5.56329e-09	5.33482e-06	down-regulated		AC068492.1	-1.81916	-0.929152	4.92538e-10	1.77154e-07	down-regulated
AL354754.1	-5.00149	3.35381	2.19391e-14	1.55493e-10	down-regulated		AC026369.1	-2.81018	4.47607	2.02185e-08	1.81764e-05	down-regulated		BX664718.1	-2.21599	-1.21102	2.11184e-09	7.4105e-07	down-regulated
AL356652.1	-5.26083	2.95361	3.67105e-14	1.73457e-10	down-regulated		AC048382.6	-2.87003	-1.09768	2.30302e-08	1.94863e-05	down-regulated		AL391869.1	-1.70888	-0.030385	2.52271e-09	8.64148e-07	down-regulated
AC082650.1	-5.7978	-0.118556	1.35185e-12	4.79061e-09	down-regulated		AL138830.2	-2.23052	-1.22246	1.24245e-07	9.92857e-05	down-regulated		AC097467.3	-2.45735	1.36374	2.9954e-09	1.0022e-06	down-regulated
AC018943.1	-4.60642	1.89904	8.61966e-12	2.44367e-08	down-regulated		AL356652.1	-3.3036	2.22689	1.45509e-07	0.000110158	down-regulated		AC024475.3	-3.10102	-0.999785	6.1203e-09	2.0012e-06	down-regulated
AC106822.1	-4.03615	-0.193236	7.6697e-11	1.81197e-07	down-regulated		AP001059.1	-2.98814	4.04508	2.8045e-07	0.0002017	down-regulated		LINC02120	-1.43177	4.10087	8.58237e-09	2.74388e-06	down-regulated
MED4-AS1	-4.12065	6.40769	3.0388e-10	6.15356e-07	down-regulated		AL354754.1	-2.8026	3.23695	3.24852e-07	0.000222508	down-regulated		AC012355.1	-1.75085	-1.11785	1.06424e-08	3.32852e-06	down-regulated
AC020594.1	-3.48817	2.54524	4.51787e-10	8.00511e-07	down-regulated		AC008514.1	-2.18875	3.54508	5.53013e-07	0.00036157	down-regulated		LINC01666	-2.21169	0.655251	1.25952e-08	3.85547e-06	down-regulated
AC016597.1	-3.60115	5.03033	6.71239e-10	1.0572e-06	down-regulated		AC011466.2	-1.77997	-0.053233	8.25335e-07	0.000516157	down-regulated		AC097512.1	-1.46692	0.269043	1.7732e-08	5.31481e-06	down-regulated
AC087855.2	-4.25891	-0.0293719	1.4437e-09	2.04645e-06	down-regulated		AC007688.3	-2.94992	3.89036	9.86615e-07	0.000591311	down-regulated		AC068135.2	-2.62611	-1.15438	1.89657e-08	5.56856e-06	down-regulated
AC026741.1	-2.96371	2.45941	4.13084e-09	5.32315e-06	down-regulated		AC092143.2	-2.29363	-0.760653	1.11603e-06	0.000642122	down-regulated		AC079360.1	-1.86479	-0.778799	1.95055e-08	5.61252e-06	down-regulated
LPP-AS1	-7.17253	0.742391	1.5763e-08	1.862e-05	down-regulated		AC003005.2	-3.03062	1.0696	1.3094e-06	0.000724401	down-regulated		AC103808.4	-2.89141	-1.08147	2.57598e-08	7.26679e-06	down-regulated
AL360181.1	-3.09915	3.5263	4.55186e-08	4.96328e-05	down-regulated		AC129492.4	-1.53226	2.92349	1.74744e-06	0.000930934	down-regulated		AC006296.2	-2.05049	-0.254094	3.31029e-08	9.15869e-06	down-regulated
AC048382.6	-3.728	-0.7696	5.33251e-08	5.39917e-05	down-regulated		AP003122.2	-2.09011	-1.18999	2.48253e-06	0.00123862	down-regulated		AF254983.1	-2.97984	-0.572812	3.45096e-08	9.30504e-06	down-regulated
LINC01940	-2.90819	0.893601	1.90404e-07	0.000179932	down-regulated		LINC02046	-3.84565	-0.823462	2.49721e-06	0.00123862	down-regulated		LINC01667	-2.72229	-0.680034	3.49254e-08	9.30504e-06	down-regulated
LINC02385	-3.91714	6.84569	4.00517e-07	0.00034332	down-regulated		AC090371.2	-2.0835	0.18704	2.63708e-06	0.00126439	down-regulated		AC103769.1	-2.43989	-0.304839	3.93259e-08	1.02869e-05	down-regulated
AC026369.1	-3.44093	5.23093	4.11742e-07	0.00034332	down-regulated		AC145350.2	-3.11191	2.40468	2.93662e-06	0.00136259	down-regulated		LINC01862	-1.29481	-0.478555	5.1999e-08	1.33591e-05	down-regulated
AP000919.4	-2.03954	3.69614	4.90718e-07	0.000386441	down-regulated		AP000919.4	-1.55126	3.49692	3.16763e-06	0.00142385	down-regulated		AC239584.1	-2.0328	-1.23844	6.54058e-08	1.62773e-05	down-regulated
LINC01660	-5.4512	-0.484031	5.22375e-07	0.000389719	down-regulated		LINC02019	-2.0386	5.35028	3.88405e-06	0.00169297	down-regulated		LINC00648	-1.87969	1.81111	1.09766e-07	2.67661e-05	down-regulated
AC104002.3	-3.67464	2.93621	6.249e-07	0.000442898	down-regulated		AC023866.1	-2.29237	-1.20157	4.74086e-06	0.00200566	down-regulated		AC093001.1	-1.49297	8.34945	1.15545e-07	2.77057e-05	down-regulated
AF064860.1	-5.66008	0.85081	7.42062e-07	0.000485482	down-regulated		AC107958.3	-1.82733	-1.08351	8.59633e-06	0.00353285	down-regulated		LINC01122	-1.97416	1.48399	1.37219e-07	3.23635e-05	down-regulated
AF064860.2	-3.35037	3.44715	7.73939e-07	0.000485482	down-regulated		AL021368.4	-1.72772	4.5955	1.06961e-05	0.00427367	down-regulated		AL391813.2	-1.88538	1.93956	1.46945e-07	3.40985e-05	down-regulated
FO704657.1	-2.65848	5.19057	7.87731e-07	0.000485482	down-regulated		AC126323.5	-2.0628	-1.24285	1.29252e-05	0.00502478	down-regulated		AC112178.1	-1.50828	-1.08686	1.73064e-07	3.89041e-05	down-regulated
AC129492.4	-2.03493	3.10919	9.80169e-07	0.000578913	down-regulated		LINC02385	-2.68498	6.34267	1.52201e-05	0.00576119	down-regulated		AC103808.3	-2.18454	0.261222	3.08977e-07	6.83884e-05	down-regulated
AL391987.4	-2.37122	1.19469	1.09348e-06	0.000596457	down-regulated		AL358393.1	-3.39852	-1.33794	1.6501e-05	0.0060859	down-regulated		AC131902.2	-2.59173	3.27875	3.34235e-07	7.28581e-05	down-regulated
AC004584.1	-2.39452	4.21377	1.09403e-06	0.000596457	down-regulated		AL137230.1	-2.24374	3.14699	2.4439e-05	0.00878825	down-regulated		AC107079.1	-1.39975	1.28738	3.69207e-07	7.81145e-05	down-regulated
AC005332.1	-1.90623	3.27654	2.46242e-06	0.00129277	down-regulated		AC133865.1	-3.24842	-1.38918	3.38556e-05	0.0118775	down-regulated		DSCAM-AS1	-1.95477	6.37715	4.48621e-07	9.22045e-05	down-regulated
AC023200.1	-2.24478	-0.0268846	3.10746e-06	0.00157315	down-regulated		FO704657.1	-1.86439	4.98743	3.61664e-05	0.0123861	down-regulated		LINC01767	-1.50929	1.83407	4.84116e-07	9.75243e-05	down-regulated
AL353753.1	-4.05689	1.19701	5.55218e-06	0.00271387	down-regulated		LINC01940	-1.83825	0.832284	3.82062e-05	0.0127804	down-regulated		AC133565.1	-1.9572	-1.14163	4.88062e-07	9.75243e-05	down-regulated
AC090971.5	-2.89617	-0.485291	8.01495e-06	0.00378707	down-regulated		AL023584.2	-1.6833	2.32996	3.92003e-05	0.0128149	down-regulated		LINC02124	-2.51162	-1.09868	1.13037e-06	0.000216835	down-regulated
LINC01541	-3.3453	-0.694047	8.51854e-06	0.00389517	down-regulated		AC024132.1	-1.49644	-0.966909	4.83773e-05	0.0154635	down-regulated		AL732372.2	-1.34184	-1.12929	1.26574e-06	0.000239344	down-regulated
AC092143.2	-2.96981	-0.491817	9.41713e-06	0.00411475	down-regulated		AC104002.3	-2.54856	2.47927	5.27426e-05	0.0164924	down-regulated		AL034548.1	-1.71012	-1.18205	1.28098e-06	0.000239344	down-regulated
AC145350.2	-3.69133	3.30638	9.57931e-06	0.00411475	down-regulated		AC009869.1	-2.05826	1.03533	5.64235e-05	0.017268	down-regulated		AL355376.1	-2.51331	-1.1609	1.47682e-06	0.000272398	down-regulated
AL589684.1	-2.55835	0.821395	1.12571e-05	0.00462016	down-regulated		AC023200.1	-1.65317	-0.214532	5.89331e-05	0.0176603	down-regulated		GPC5-AS2	-2.36903	-1.19652	1.61651e-06	0.000294388	down-regulated
LINC00311	-2.44519	1.07697	1.14078e-05	0.00462016	down-regulated		AC005332.1	-1.31577	3.26406	6.73824e-05	0.0197802	down-regulated		AL158069.1	-1.08647	0.0646105	1.82379e-06	0.000323936	down-regulated
AC087501.3	-3.42571	0.17237	1.24021e-05	0.00488334	down-regulated		LINC01834	-1.18221	-1.00616	7.73742e-05	0.022259	down-regulated		FAM230C	-2.34015	-0.541722	2.10378e-06	0.000364861	down-regulated
AC021491.3	-2.67183	1.90375	1.55613e-05	0.00596165	down-regulated		LINC01072	-2.08318	0.158008	8.80474e-05	0.0248328	down-regulated		AL391152.1	-1.39902	3.53962	2.10492e-06	0.000364861	down-regulated
AC116634.1	-3.33978	4.16865	1.79819e-05	0.00670772	down-regulated		AC091027.2	-3.46485	-1.35743	0.000107593	0.0297618	down-regulated		AC093607.1	-2.56631	-1.16649	2.52439e-06	0.000418848	down-regulated
CERS6-AS1	-2.39005	5.14975	2.03359e-05	0.0073913	down-regulated		AC024587.2	-2.69765	-1.26474	0.000109837	0.0298093	down-regulated		AC015712.4	-1.88621	1.2921	2.5409e-06	0.000418848	down-regulated
AC103808.5	-3.20924	-0.701205	2.14288e-05	0.00759384	down-regulated		AC087501.3	-2.28302	-0.101018	0.000123396	0.0328691	down-regulated		AC005618.1	-1.13037	5.87634	2.56194e-06	0.000418848	down-regulated
LINC00658	-2.41889	2.20004	3.88704e-05	0.0134387	down-regulated		AL008726.1	-1.47485	1.9157	0.00012957	0.033886	down-regulated		AC099554.1	-2.28431	-1.19089	2.98879e-06	0.000483143	down-regulated
AC008649.1	-2.45821	3.71041	4.1512e-05	0.0140103	down-regulated		AC009035.1	-1.45166	-1.08938	0.000181899	0.0467221	down-regulated		AC018529.1	-1.22707	1.41023	3.21585e-06	0.000514072	down-regulated
AC010336.3	-2.59641	0.430648	5.083e-05	0.0167562	down-regulated		AC020594.1	-1.87631	2.65149	0.000200034	0.0504789	down-regulated		AC026369.3	-1.68321	0.92825	5.97274e-06	0.000923977	down-regulated
AC027544.2	-1.93389	2.67208	6.03783e-05	0.0194514	down-regulated		MAGI2-AS1	-1.87535	-1.38863	0.000211001	0.0523282	down-regulated		AP003064.1	-2.5839	1.55539	6.42468e-06	0.000956151	down-regulated
AP003122.2	-2.80326	-1.08768	6.19458e-05	0.0195129	down-regulated		LINC00658	-1.83025	1.93364	0.000248941	0.0606911	down-regulated		LINC00378	-2.53143	-1.14566	6.44656e-06	0.000956151	down-regulated
AC010745.4	-2.5957	2.47596	6.51675e-05	0.0200815	down-regulated		AC008649.1	-1.88347	3.41756	0.000266921	0.0639899	down-regulated		LINC00824	-1.88605	-0.226978	6.66925e-06	0.000979087	down-regulated
AC009486.1	-2.16912	3.81986	0.000119937	0.0361724	down-regulated		AC093655.1	-1.65313	4.0414	0.000280838	0.0662226	down-regulated		ARHGEF9-IT1	-1.30117	1.12298	6.93627e-06	0.001008	down-regulated
AL353651.1	-2.39794	1.05107	0.000130792	0.0384533	down-regulated		AC009486.1	-1.65369	3.56932	0.000324629	0.0753139	down-regulated		LINC01650	-1.29752	-0.25172	7.08177e-06	0.00101673	down-regulated
AC099509.2	-2.59347	3.11243	0.000132925	0.0384533	down-regulated		AC011474.1	-3.49156	-1.27569	0.000337233	0.0769961	down-regulated		AC007126.1	-2.50577	-0.982052	7.15022e-06	0.00101673	down-regulated
AC025946.1	-2.94485	-0.892085	0.00016183	0.0458787	down-regulated		AL078612.2	-1.88901	-1.04806	0.00038438	0.0863894	down-regulated		AC103409.1	-2.34138	-1.07933	7.23823e-06	0.00101673	down-regulated
AC024132.1	-1.84305	-0.806098	0.000169619	0.0470496	down-regulated		AC044839.1	-3.22194	-1.33587	0.000481653	0.103534	down-regulated		AL139023.1	-1.33039	0.043931	7.78368e-06	0.00107677	down-regulated
AP000462.3	-2.33402	1.10575	0.000172598	0.0470496	down-regulated		LINC01495	-3.13824	-1.30211	0.000483477	0.103534	down-regulated		AC100839.1	-2.09827	-0.960409	8.22958e-06	0.00112761	down-regulated
LINC02251	-1.90814	0.974494	0.000205342	0.0549194	down-regulated		LINC01585	-2.19481	0.643594	0.000489455	0.103534	down-regulated		AC108142.1	-1.39421	0.162989	8.44887e-06	0.00114674	down-regulated
LINC01834	-1.54374	-0.871844	0.000216472	0.0560879	down-regulated		LINC02055	-2.04375	1.15358	0.000583206	0.117115	down-regulated		AC010485.1	-1.72898	-0.828825	8.60671e-06	0.00115724	down-regulated
AC090099.4	-3.06464	-1.05831	0.000218039	0.0560879	down-regulated		AC007557.2	-1.43839	-1.23143	0.000592451	0.117115	down-regulated		AP001205.1	-1.40015	-1.0224	8.86138e-06	0.00118045	down-regulated
AC009509.1	-2.6341	2.9525	0.000221582	0.0560879	down-regulated		LINC01233	-1.78811	-0.351914	0.000594368	0.117115	down-regulated		AL162413.1	-1.76752	2.73312	9.23541e-06	0.00121899	down-regulated
AL136097.2	-2.92912	1.51934	0.00023279	0.0575556	down-regulated		AP003065.1	-1.78463	-1.15966	0.00064498	0.12537	down-regulated		AC005899.8	-1.11841	2.17341	1.00552e-05	0.00129596	down-regulated
AL008726.1	-1.98367	2.0741	0.000235501	0.0575556	down-regulated		AL935212.2	-2.79006	-1.3669	0.000665342	0.127604	down-regulated		LINC00442	-1.49614	-0.868986	1.00888e-05	0.00129596	down-regulated
AL353747.3	-2.45764	0.544296	0.000263755	0.0624619	down-regulated		AP000462.3	-1.87458	0.810423	0.000752168	0.138707	down-regulated		AC022695.3	-1.21735	-1.22317	1.04381e-05	0.0013266	down-regulated
AC008514.1	-2.2247	4.24863	0.000264389	0.0624619	down-regulated		AC079763.1	-1.38129	-0.913834	0.000774916	0.141093	down-regulated		LINC01243	-1.37928	-1.20488	1.05118e-05	0.0013266	down-regulated
LINC01495	-3.596	-1.15708	0.000281618	0.0642432	down-regulated		AL121827.1	-1.88652	2.93179	0.000880305	0.15704	down-regulated		LINC01490	-2.37056	-0.669871	1.08898e-05	0.00136236	down-regulated
LINC02272	-1.7756	-0.747936	0.000285525	0.0642432	down-regulated		AC027544.2	-1.37262	2.55229	0.000887825	0.15704	down-regulated		AC022523.1	-1.10983	-0.397129	1.16703e-05	0.00144079	down-regulated
LINC00929	-1.85458	0.190481	0.000303857	0.0662641	down-regulated		AC068135.2	-2.39831	-1.32129	0.000895997	0.15704	down-regulated		AC114498.1	-1.27242	-0.839435	1.1717e-05	0.00144079	down-regulated
LINC00690	-1.81678	-0.425367	0.000319301	0.0684471	down-regulated		AC023128.1	-2.2769	4.86823	0.00090617	0.15704	down-regulated		AL049820.1	-1.87635	0.724226	1.20941e-05	0.00146216	down-regulated
AC105345.2	-2.5306	1.5083	0.000323524	0.0684471	down-regulated		LINC00929	-1.34734	0.0693038	0.000944114	0.160017	down-regulated		AP003064.2	-1.24325	3.33447	1.24256e-05	0.00148973	down-regulated
AL049835.1	-2.21886	4.42492	0.000358269	0.0746833	down-regulated		LINC00396	-1.17304	-0.92951	0.000960813	0.160702	down-regulated		LINC02327	-1.14808	1.71665	1.72567e-05	0.0020022	down-regulated
LINC01795	-2.54309	0.95113	0.000370284	0.0760692	down-regulated		AC074237.1	-2.2547	-1.38441	0.000999989	0.164211	down-regulated		AL157401.1	-1.34466	0.194518	2.01225e-05	0.00230672	down-regulated
AC107958.3	-2.22753	-0.852854	0.000411795	0.0833886	down-regulated		AC010982.1	-3.03501	-1.02244	0.00100463	0.164211	down-regulated		AC099329.2	-1.91951	2.84356	2.02021e-05	0.00230672	down-regulated
AL023584.2	-1.93996	2.66518	0.000418725	0.0835157	down-regulated		AC015878.1	-2.85605	0.558515	0.00111803	0.175359	down-regulated		AC131902.1	-2.09175	5.36468	2.20112e-05	0.00247403	down-regulated
AC011466.2	-1.93584	0.2931	0.000424207	0.0835157	down-regulated		AC010745.4	-1.83103	2.27648	0.0011216	0.175359	down-regulated		AC134508.1	-1.02546	-0.808698	2.50027e-05	0.00276703	down-regulated
LINC01484	-2.35717	4.64476	0.000525533	0.102047	down-regulated		AC011474.3	-1.49722	0.343665	0.00115596	0.178381	down-regulated		AL356010.2	-1.47087	-1.22178	2.57042e-05	0.00280157	down-regulated
AC009035.1	-1.7949	-0.954383	0.000619928	0.115625	down-regulated		CERS6-AS1	-1.62632	5.03459	0.00116573	0.178381	down-regulated		LINC02285	-1.25872	7.00627	3.20117e-05	0.00333734	down-regulated
AP000919.2	-2.65816	6.1788	0.000631132	0.116186	down-regulated		AC087855.2	-2.15461	-0.0470377	0.00118548	0.179494	down-regulated		HLTF-AS1	-1.41173	-1.17535	3.34169e-05	0.00345877	down-regulated
AL023803.1	-1.75967	2.89645	0.000679793	0.121976	down-regulated		AC103808.5	-1.83603	-0.798491	0.00121078	0.181415	down-regulated		NRG1-IT1	-1.19158	-0.937522	3.98058e-05	0.004033	down-regulated
AL137230.1	-2.31743	3.81063	0.000693078	0.122805	down-regulated		AC013643.2	-1.62128	2.99664	0.00128704	0.190853	down-regulated		AC022784.6	-1.29939	-0.491122	4.42472e-05	0.00442072	down-regulated
AC013643.2	-1.8976	3.34305	0.000739785	0.127884	down-regulated		AC099509.2	-1.93826	2.75408	0.00131661	0.191112	down-regulated		AC005394.1	-1.17583	0.152082	4.47605e-05	0.00444117	down-regulated
LINC02178	-2.08935	0.4728	0.00081471	0.137482	down-regulated		AC010186.3	-1.01256	7.72832	0.0013305	0.191112	down-regulated		SLC8A1-AS1	-1.74286	1.1475	4.95056e-05	0.00480382	down-regulated
AC011474.3	-1.75738	0.616409	0.000881888	0.145695	down-regulated		AC133528.1	-1.47336	6.91484	0.0013685	0.191112	down-regulated		AC106771.1	-2.18859	0.724794	4.95921e-05	0.00480382	down-regulated
AC009869.1	-2.31521	1.49723	0.000986151	0.160638	down-regulated		AC004584.1	-1.48332	4.23549	0.00138278	0.191249	down-regulated		LINC02461	-1.04455	-0.407657	4.97511e-05	0.00480382	down-regulated
AC007688.3	-2.60243	5.0064	0.000997258	0.160638	down-regulated		AP001972.4	-1.33042	-0.192453	0.00143023	0.195928	down-regulated		AC009108.2	-1.16806	-1.20626	5.02596e-05	0.00482057	down-regulated
AL356022.1	-1.76086	-0.292873	0.0011283	0.171975	down-regulated		Z95114.4	-1.70504	0.483439	0.00148141	0.201025	down-regulated		AL713851.1	-1.28604	-1.09035	5.08313e-05	0.00484311	down-regulated
LINC02019	-1.9543	6.08439	0.00118179	0.178011	down-regulated		AC068489.1	-2.65	-1.35746	0.0015483	0.207362	down-regulated		DSCAM-IT1	-2.04694	-1.17097	5.23313e-05	0.00492085	down-regulated
AC090358.1	-2.489	0.18168	0.00125262	0.184957	down-regulated		AL133383.1	-1.19991	0.696231	0.00155694	0.207362	down-regulated		AC105935.2	-2.05472	-1.15493	5.54706e-05	0.00511574	down-regulated
AL354766.2	-1.63038	4.74064	0.00133649	0.193314	down-regulated		AL356010.2	-1.59031	-1.34931	0.00166058	0.217144	down-regulated		AC107419.1	-1.37728	1.92112	7.07714e-05	0.0064037	down-regulated
AC093655.1	-1.75702	4.48174	0.00148747	0.210849	down-regulated		AC090971.5	-2.00569	-0.693917	0.00169456	0.21959	down-regulated		LINC01523	-1.49895	-1.24605	7.85112e-05	0.00688745	down-regulated
AC091027.2	-3.41828	-1.17982	0.00156555	0.217565	down-regulated		CR383656.11	-1.70135	-1.38509	0.00176452	0.226614	down-regulated		AC007450.1	-1.22589	2.60959	7.90397e-05	0.00689178	down-regulated
LINC02151	-1.64094	0.423613	0.00177013	0.2345	down-regulated		SFTPD-AS1	-1.16816	2.97197	0.00190075	0.239651	down-regulated		AL035443.1	-2.04705	-0.998295	8.03896e-05	0.00696726	down-regulated
LINC01696	-1.92304	0.0236857	0.00183424	0.239967	down-regulated		MAPT-IT1	-1.17286	2.31703	0.00193317	0.239713	down-regulated		AC098850.3	-1.22109	-1.10648	8.48698e-05	0.00726799	down-regulated
AL732372.1	-2.30952	1.15927	0.00184525	0.239967	down-regulated		AC007126.1	-3.07343	-1.13598	0.00195805	0.240724	down-regulated		AC011467.1	-1.91603	-0.578563	0.000103799	0.00847091	down-regulated
AC016746.1	-2.04338	-0.786561	0.00199293	0.251021	down-regulated		AC037441.2	-2.83256	-1.02006	0.00201074	0.245106	down-regulated		AL049812.3	-1.94622	-1.03619	0.000109161	0.00877377	down-regulated
AL121827.1	-2.15449	3.37958	0.00199744	0.251021	down-regulated		AC005234.1	-1.8622	-1.34214	0.00203928	0.246496	down-regulated		LINC02466	-1.66289	-0.105353	0.000115534	0.00918338	down-regulated
AC003005.2	-2.88927	1.68462	0.00200955	0.251021	down-regulated		LINC00690	-1.37642	-0.615125	0.00211	0.252919	down-regulated		AC090503.2	-1.05746	0.577053	0.000116782	0.00923157	down-regulated
SFTPD-AS1	-1.44446	3.16189	0.0020188	0.251021	down-regulated		AL662797.3	-1.17429	4.70556	0.00216312	0.256764	down-regulated		AL713851.2	-1.54241	-0.627541	0.00011861	0.00932482	down-regulated
AL358393.1	-3.12801	-1.12288	0.00208187	0.256613	down-regulated		LINC01856	-1.52992	-0.354472	0.00217778	0.256764	down-regulated		AP006437.2	-1.52138	-0.115088	0.00012065	0.00943362	down-regulated
AL589935.1	-1.25059	2.92595	0.00213549	0.260954	down-regulated		AC021491.3	-1.73999	1.82456	0.0025552	0.286021	down-regulated		LINC00254	-1.33255	-1.24562	0.000125018	0.00972234	down-regulated
AL121718.1	-1.7551	-0.453742	0.00235114	0.280261	down-regulated		AL162171.3	-1.29019	6.58985	0.00255901	0.286021	down-regulated		AC026790.2	-1.85156	-0.647336	0.000129835	0.00999566	down-regulated
AP003065.1	-2.0979	-1.02385	0.00235281	0.280261	down-regulated		AL160290.2	-1.65129	4.86274	0.00258221	0.286021	down-regulated		Z97205.2	-2.15812	-0.941915	0.000140653	0.0107068	down-regulated
AL133383.1	-1.4679	0.877128	0.00242598	0.286569	down-regulated		AC005632.4	-2.84001	-1.11825	0.00258501	0.286021	down-regulated		AC135388.1	-1.09305	-0.387975	0.000147857	0.0110686	down-regulated
NAV2-AS4	-1.8922	1.11287	0.00250362	0.290892	down-regulated		TTC21B-AS1	-1.05082	1.75373	0.00282539	0.307882	down-regulated		FAM85B	-1.59784	0.730578	0.000148484	0.0110686	down-regulated
AC139426.2	-2.03679	1.69856	0.00256222	0.29414	down-regulated		AC020637.1	-2.61549	2.53247	0.00309396	0.329745	down-regulated		LINC00967	-1.81388	-0.668293	0.000149994	0.0111235	down-regulated
AC007381.1	-1.74127	2.67858	0.00286269	0.31702	down-regulated		LINC01912	-2.20543	8.14209	0.0030948	0.329745	down-regulated		AC025470.2	-1.01188	1.35202	0.000154584	0.0114051	down-regulated
TTTY4	-1.21577	-0.384216	0.002915	0.320311	down-regulated		AL138957.1	-1.15561	-1.24575	0.00318056	0.333935	down-regulated		AJ239322.1	-1.51336	-1.01619	0.000165663	0.0120374	down-regulated
LINC02440	-1.79878	-1.2542	0.00300774	0.320961	down-regulated		LINC00626	-1.49563	0.0379612	0.00327415	0.341271	down-regulated		LINC01922	-1.87848	-1.16625	0.000168802	0.0122038	down-regulated
LINC01585	-2.31967	0.934492	0.00301557	0.320961	down-regulated		AC239584.1	-2.25921	-1.3748	0.00337254	0.345503	down-regulated		USP12-AS2	-1.62596	-0.0426039	0.000204969	0.0144554	down-regulated
AC023866.1	-2.1775	-0.969687	0.00308904	0.320961	down-regulated		AC008592.2	-1.8869	-1.14226	0.00342396	0.345503	down-regulated		LINC01096	-1.61376	1.22918	0.000213137	0.0148855	down-regulated
AC004241.1	-1.0699	5.50957	0.00309981	0.320961	down-regulated		AL049775.2	-1.50461	-0.0933378	0.00357515	0.357118	down-regulated		AP003555.1	-1.44549	-0.999126	0.000252906	0.0171976	down-regulated
AC007223.1	-3.04969	-0.783559	0.00310206	0.320961	down-regulated		TTTY11	-1.55935	-1.38889	0.0036049	0.357606	down-regulated		AP001605.1	-1.7071	-0.451162	0.000265674	0.0179449	down-regulated
AC097494.1	-2.75382	-1.21879	0.00327339	0.334457	down-regulated		LINC01621	-2.59849	-1.39016	0.003796	0.36893	down-regulated		AC092924.1	-1.59987	-1.24065	0.000270631	0.0181943	down-regulated
AC009021.2	-1.49866	-0.604064	0.00328753	0.334457	down-regulated		LINC02251	-1.25634	0.938317	0.00404087	0.371718	down-regulated		LINC02267	-1.44578	-0.951055	0.000276184	0.0184812	down-regulated
AC093019.2	-1.435	-0.854	0.00330916	0.334457	down-regulated		AL353699.1	-1.05373	2.81319	0.00410765	0.373952	down-regulated		LINC01486	-1.13443	-0.872954	0.000278463	0.0185474	down-regulated
AL049775.2	-1.7899	0.145406	0.00332688	0.334457	down-regulated		AC012055.1	-2.70256	-1.14517	0.00422605	0.379922	down-regulated		AC016687.2	-1.43498	-1.25967	0.000294605	0.0194426	down-regulated
AP001972.4	-1.70036	-0.0490359	0.00339551	0.337636	down-regulated		AC016746.1	-1.67001	-0.88561	0.00427353	0.381804	down-regulated		AL121989.1	-1.06762	0.0142937	0.000321515	0.0208362	down-regulated
AC073569.3	-1.05856	2.6489	0.00340614	0.337636	down-regulated		AP000919.2	-1.8447	5.9835	0.00446605	0.386986	down-regulated		AP005230.1	-1.71126	0.293056	0.000354	0.0224361	down-regulated
AC087565.1	-2.40716	6.04577	0.00351703	0.346208	down-regulated		ARHGAP26-AS1	-1.53066	0.976387	0.0045167	0.389031	down-regulated		ZEB2-AS1	-1.32026	1.50431	0.000408157	0.0249919	down-regulated
U47924.3	-1.57962	1.34498	0.00359464	0.351407	down-regulated		AC091885.2	-2.6052	-1.23493	0.00465357	0.398434	down-regulated		AC104996.1	-1.07008	0.348857	0.000443493	0.026809	down-regulated
AC005234.1	-2.70649	-1.20891	0.00364014	0.352736	down-regulated		AL162430.2	-1.2493	4.97503	0.00481286	0.408267	down-regulated		AL136537.2	-1.23321	1.02635	0.00047216	0.0281151	down-regulated
AC144521.1	-1.71804	0.803887	0.00379667	0.358656	down-regulated		AC007381.1	-1.26279	2.55964	0.00482518	0.408267	down-regulated		LINC00930	-1.82665	6.16324	0.000472916	0.0281151	down-regulated
LINC01912	-2.63786	8.64138	0.00379874	0.358656	down-regulated		HNF4A-AS1	-1.71133	2.65903	0.00489866	0.409665	down-regulated		LINC02055	-1.17541	1.17648	0.000507213	0.0299068	down-regulated
AC009137.1	-1.719	-1.0747	0.00382061	0.358656	down-regulated		LINC00161	-2.46461	4.25932	0.00496384	0.412716	down-regulated		LINC01385	-1.94364	-0.827779	0.000521204	0.0303586	down-regulated
AP001059.1	-2.393	5.37881	0.00433052	0.40121	down-regulated		AC106822.1	-1.7732	-0.0526231	0.00509977	0.416176	down-regulated		AL133304.3	-1.03339	-0.933354	0.000535179	0.0310469	down-regulated
AC020897.1	-1.25594	-1.14904	0.00462947	0.423372	down-regulated		AP000253.1	-1.17248	2.19486	0.00520852	0.416176	down-regulated		AL627309.3	-1.39776	-0.53986	0.000544175	0.031442	down-regulated
AL158832.1	-1.5269	-0.61228	0.00487422	0.440077	down-regulated		AL137071.1	-1.25134	-1.12123	0.00522188	0.416176	down-regulated		AC016292.1	-1.35341	1.49417	0.000567961	0.0325548	down-regulated
AL021368.4	-1.53061	5.21487	0.00493789	0.441599	down-regulated		LINC01484	-1.63577	4.49166	0.00530786	0.416354	down-regulated		AC007326.2	-1.85168	-1.00189	0.000572602	0.0326366	down-regulated
AC124067.4	-1.33597	6.20796	0.00507698	0.446995	down-regulated		LINC01749	-1.67103	-1.17806	0.00533296	0.416354	down-regulated		LINC02372	-1.0067	-0.981481	0.000573924	0.0326366	down-regulated
AP000842.2	-2.02759	-0.961644	0.00513935	0.447033	down-regulated		LINC01139	-1.22037	5.00556	0.00535494	0.416354	down-regulated		AL596087.2	-1.36741	-0.622146	0.000576871	0.032675	down-regulated
LINC01735	-1.60568	-0.405926	0.0051555	0.447033	down-regulated		AC002563.1	-1.11319	-0.0415676	0.00568989	0.435337	down-regulated		AC084116.3	-1.65144	-1.22763	0.000589078	0.0332355	down-regulated
LINC01648	-1.46196	0.833894	0.00517202	0.447033	down-regulated		LINC02155	-1.059	-1.40843	0.00600308	0.449731	down-regulated		AC011474.1	-1.80653	-1.16882	0.000685422	0.037212	down-regulated
AL355922.5	-2.24122	-1.10427	0.00521286	0.447832	down-regulated		LINC00456	-1.8626	-0.176303	0.0062831	0.466511	down-regulated		AC139712.3	-1.07719	-1.2465	0.000690933	0.0373701	down-regulated
AC016994.1	-2.86273	-1.21972	0.00529881	0.449765	down-regulated		AL583839.2	-2.17888	-1.04127	0.00631412	0.466511	down-regulated		AC091173.1	-1.78949	-1.17991	0.000732663	0.0390401	down-regulated
AL357832.2	-2.9344	-1.15856	0.00537281	0.453331	down-regulated		LINC01592	-1.10991	1.09457	0.00642164	0.468878	down-regulated		LINC02006	-1.00371	6.06057	0.000739006	0.0391194	down-regulated
AC133865.1	-2.95752	-1.21398	0.0054734	0.456604	down-regulated		AC090099.4	-1.75265	-1.13347	0.00676466	0.488137	down-regulated		LINC02295	-2.00893	-1.1055	0.000756252	0.0398542	down-regulated
AP000146.1	-2.95763	-1.21398	0.00547602	0.456604	down-regulated		C11orf44	-1.14916	-0.178734	0.0069229	0.491084	down-regulated		AC079226.2	-1.0621	1.58351	0.000774722	0.0406786	down-regulated
AL353699.1	-1.28604	2.86746	0.00569696	0.466788	down-regulated		AC090358.1	-1.83681	-0.0946333	0.00693063	0.491084	down-regulated		AL022313.4	-1.75932	-0.743212	0.000835952	0.0435755	down-regulated
AC018362.2	-1.49919	-1.07458	0.00578344	0.468458	down-regulated		LINC02348	-2.72741	-1.06071	0.00697184	0.491583	down-regulated		AL583839.2	-1.55338	-0.92443	0.000941586	0.0481921	down-regulated
AC073263.1	-1.17346	4.74731	0.0060504	0.471902	down-regulated		AC119424.1	-1.40738	2.93401	0.00731683	0.502843	down-regulated		AC096644.4	-1.38964	-0.858316	0.000944616	0.0481921	down-regulated
AC023128.1	-2.34548	5.59871	0.00618583	0.47822	down-regulated		AP002802.1	-2.58648	-1.33982	0.00739147	0.502843	down-regulated		AC110741.1	-1.28041	-0.984577	0.00101973	0.0511178	down-regulated
AC127502.2	-1.15477	6.70475	0.00620759	0.47822	down-regulated		AC003973.1	-2.40873	-1.38256	0.00740863	0.502843	down-regulated		AC009970.1	-1.11546	3.23167	0.00108513	0.0538335	down-regulated
AC026336.3	-1.92564	2.37426	0.00674106	0.505284	down-regulated		Z69720.1	-1.579	4.29127	0.00797848	0.531356	down-regulated		ADARB2-AS1	-1.54336	0.123325	0.0011195	0.0551582	down-regulated
AL138899.1	-1.71322	0.69658	0.00677277	0.505284	down-regulated		AC007448.2	-1.96861	-1.15985	0.00805308	0.531356	down-regulated		LINC00635	-1.05297	-0.617077	0.00118685	0.0574241	down-regulated
AC136698.1	-1.47443	-0.620064	0.00693295	0.511847	down-regulated		AC093330.1	-1.43813	2.70106	0.00821856	0.536635	down-regulated		MYO16-AS1	-1.59408	-0.785644	0.00119646	0.0574241	down-regulated
LINC00668	-1.67986	8.44968	0.00701295	0.51507	down-regulated		AL391987.4	-1.26768	1.39161	0.00824593	0.536635	down-regulated		AC097501.1	-1.79315	-1.18629	0.0011971	0.0574241	down-regulated
AC018557.2	-1.60967	2.69078	0.00707491	0.516942	down-regulated		AC106894.1	-2.20084	-1.32252	0.0092504	0.564788	down-regulated		LINC02030	-1.72413	-0.154557	0.00124875	0.0596869	down-regulated
AC009974.1	-1.30116	4.50311	0.00752469	0.535992	down-regulated		AC012378.1	-1.09414	-0.470391	0.00928516	0.564788	down-regulated		AC021237.1	-1.70746	-1.01489	0.00127005	0.0602272	down-regulated
MAGI2-AS1	-2.29907	-1.24261	0.0077725	0.543515	down-regulated		AL591242.1	-1.85621	0.0597296	0.0093058	0.564788	down-regulated		AC010333.2	-1.14127	3.03429	0.00127261	0.0602272	down-regulated
LINC02042	-1.64046	-0.771513	0.00782201	0.543515	down-regulated		AC009974.1	-1.05127	4.32332	0.00966234	0.574311	down-regulated		AC007223.1	-1.24146	-1.23807	0.00129582	0.0609982	down-regulated
AP000253.1	-1.22119	2.4644	0.00810543	0.552377	down-regulated		AC008764.7	-1.72099	4.50358	0.010212	0.59366	down-regulated		LINC02353	-1.54912	-1.24774	0.00131408	0.0613822	down-regulated
AC093330.1	-1.61856	3.04885	0.0083322	0.557118	down-regulated		AC008278.1	-2.28664	-1.21547	0.0102567	0.59366	down-regulated		AC003973.1	-1.15255	-1.26747	0.0013434	0.0618303	down-regulated
AC119424.1	-1.84517	3.08951	0.00896162	0.573382	down-regulated		AC090505.2	-1.04368	-0.930454	0.010382	0.59366	down-regulated		AL662797.1	-1.70346	-1.13932	0.00134516	0.0618303	down-regulated
AC106864.2	-1.10499	-1.02346	0.00900481	0.573382	down-regulated		AL592464.2	-1.70872	-1.28394	0.0107535	0.606579	down-regulated		LINC02293	-1.62748	-1.02656	0.00137235	0.0626819	down-regulated
AC092954.1	-2.31852	-1.18933	0.00959217	0.592928	down-regulated		AC004923.4	-1.05697	5.11568	0.0108346	0.607661	down-regulated		AC087894.2	-1.3507	-1.18215	0.00137241	0.0626819	down-regulated
AL078612.2	-1.97584	-0.815977	0.0096207	0.592928	down-regulated		AC105031.2	-1.79827	-1.2747	0.0115992	0.624881	down-regulated		LINC01923	-1.496	-1.22188	0.00139223	0.0629876	down-regulated
AF127577.2	-1.42081	3.33105	0.0099194	0.603466	down-regulated		AF127577.2	-1.13239	3.17216	0.0118521	0.631412	down-regulated		AC105999.1	-1.04338	-1.12897	0.00154142	0.0687613	down-regulated
SRGAP3-AS2	-2.63567	1.0599	0.0105606	0.626347	down-regulated		INTS9-AS1	-1.32426	0.246671	0.0122094	0.642099	down-regulated		GACAT3	-1.35197	-0.827223	0.00172439	0.0739237	down-regulated
TRPC7-AS2	-1.79297	0.483899	0.0112577	0.662148	down-regulated		AL354896.1	-2.59548	-1.08374	0.012221	0.642099	down-regulated		AC073912.2	-1.20446	-0.808068	0.00184455	0.0778225	down-regulated
AL121956.1	-1.19935	-1.13319	0.0114415	0.670179	down-regulated		LINC01648	-1.19406	0.642505	0.0123652	0.642099	down-regulated		AC243829.1	-1.39104	1.99594	0.0018735	0.0788132	down-regulated
LINC02046	-2.90825	-0.159463	0.0116565	0.674412	down-regulated		AC005291.1	-1.29365	-0.312288	0.0129627	0.652436	down-regulated		AL512310.11	-1.5022	-0.545533	0.00189056	0.0792989	down-regulated
AC009154.1	-1.42439	-0.946242	0.0121062	0.680975	down-regulated		AC096733.1	-1.61771	-1.27179	0.0138522	0.661959	down-regulated		AC096732.1	-1.33563	-1.18638	0.00209701	0.0866944	down-regulated
AL591242.1	-2.00374	0.15686	0.0126724	0.701684	down-regulated		AC090651.1	-2.38821	-0.919123	0.0139478	0.662131	down-regulated		AP001122.1	-1.29502	2.13522	0.00222622	0.0907325	down-regulated
AC004824.1	-1.48099	-1.13833	0.0130016	0.714332	down-regulated		AC026741.1	-1.3479	2.84595	0.0141889	0.669051	down-regulated		LINC01824	-1.65289	-1.06427	0.00242999	0.0960533	down-regulated
AC006305.2	-1.77635	0.955737	0.0130992	0.716917	down-regulated		AC112204.2	-1.11705	-0.499914	0.0147795	0.67533	down-regulated		AL138733.2	-1.40355	-0.943665	0.00248167	0.0975515	down-regulated
Z84485.1	-1.09639	6.62437	0.0133724	0.726259	down-regulated		LINC00349	-1.63322	3.72357	0.0147899	0.67533	down-regulated		C8orf49	-1.30018	-1.02636	0.00249441	0.0977848	down-regulated
AL157400.2	-1.73077	3.20663	0.0141262	0.749956	down-regulated		AC006305.2	-1.53337	0.638797	0.0149936	0.677097	down-regulated		LINC01695	-1.43268	2.3838	0.00252998	0.0981101	down-regulated
AC044873.1	-1.77134	-1.17839	0.0146375	0.762567	down-regulated		AL353651.1	-1.44028	1.08566	0.0150285	0.677097	down-regulated		AC091885.2	-1.41431	-1.12615	0.00264005	0.101052	down-regulated
AP001010.1	-1.28467	4.3491	0.0147206	0.762567	down-regulated		AC034238.2	-1.54621	3.62611	0.0151368	0.677097	down-regulated		LINC01595	-1.81842	-1.05289	0.00264095	0.101052	down-regulated
BX546450.1	-1.83688	3.93761	0.0150319	0.762567	down-regulated		LINC01720	-1.33625	0.390609	0.0151591	0.677097	down-regulated		LINC01251	-1.4054	-0.204734	0.00274406	0.103948	down-regulated
AC010139.1	-1.45223	-1.21993	0.0150586	0.762567	down-regulated		MLIP-AS1	-2.07134	-1.14569	0.015254	0.677202	down-regulated		AC068875.1	-1.60709	-1.13288	0.00279459	0.104702	down-regulated
AC099560.1	-1.21878	-0.486505	0.0152752	0.762703	down-regulated		C7orf66	-1.37562	-1.13366	0.0153177	0.677938	down-regulated		AC003101.1	-1.20861	-0.673247	0.00286381	0.106464	down-regulated
AL160290.2	-1.58463	5.40955	0.015281	0.762703	down-regulated		MIR133A1HG	-1.03366	6.26554	0.0156558	0.688275	down-regulated		LINC02448	-1.57692	-1.21805	0.00291311	0.10774	down-regulated
AC109462.3	-1.07703	0.114041	0.0157433	0.766876	down-regulated		AC016877.1	-1.43576	4.72349	0.0156948	0.688275	down-regulated		AC245100.7	-1.33474	2.45538	0.00295702	0.108527	down-regulated
AC015909.2	-1.10696	2.45975	0.0160793	0.772623	down-regulated		AP000146.1	-2.5498	-1.32254	0.0158837	0.68864	down-regulated		AC110760.1	-1.02011	-0.0305134	0.00312901	0.113393	down-regulated
AC026461.2	-2.49211	-1.18198	0.0171478	0.789709	down-regulated		Z98742.1	-1.38537	-1.33995	0.0165428	0.697911	down-regulated		LINC02255	-1.71303	-1.01036	0.00318406	0.11462	down-regulated
AC004923.4	-1.18384	5.35747	0.0172897	0.790584	down-regulated		AC090821.1	-1.53982	-1.34104	0.016679	0.697911	down-regulated		AC113398.2	-1.49657	-1.23117	0.0032844	0.116962	down-regulated
AC016877.1	-1.5761	5.09812	0.0183659	0.812176	down-regulated		AL157400.2	-1.4229	2.92196	0.0167151	0.697911	down-regulated		AC016687.3	-1.61539	-1.05844	0.0034879	0.122093	down-regulated
AC012055.1	-2.62663	-0.961429	0.0184722	0.812176	down-regulated		AC084116.3	-2.17036	-1.35325	0.0167394	0.697911	down-regulated		AP000532.2	-1.52632	-0.706772	0.00373799	0.128965	down-regulated
CR383656.11	-1.72194	-1.2592	0.0185421	0.812176	down-regulated		AC018557.2	-1.22496	2.55493	0.0172541	0.707073	down-regulated		LINC01675	-1.41895	-0.669423	0.00376129	0.129459	down-regulated
AC008764.7	-1.89487	4.94728	0.018806	0.812176	down-regulated		AC018618.1	-2.19091	-0.827159	0.0174002	0.708619	down-regulated		LINC00221	-1.6198	0.644801	0.00408708	0.139339	down-regulated
LINC01592	-1.26044	1.34752	0.0197438	0.828904	down-regulated		AC003975.1	-1.51949	-1.33486	0.0174396	0.708619	down-regulated		LINC01111	-1.66806	-1.08954	0.0042796	0.143795	down-regulated
LINC01856	-1.54803	-0.112903	0.0197451	0.828904	down-regulated		AC096736.3	-2.33182	-1.16831	0.0177117	0.713629	down-regulated		AC008601.1	-1.0456	-1.10555	0.00458507	0.151297	down-regulated
LINC01724	-1.10325	-0.319478	0.0198988	0.828904	down-regulated		AL645937.4	-1.77504	5.89417	0.0179699	0.717755	down-regulated		AC016766.1	-1.26734	-1.07418	0.00460797	0.15141	down-regulated
LINC00396	-1.02006	-0.755945	0.019919	0.828904	down-regulated		AC005303.1	-2.00449	-1.37575	0.0182392	0.720419	down-regulated		AC096711.1	-1.29969	-0.119754	0.00474592	0.154479	down-regulated
AC112204.2	-1.40885	-0.350226	0.0204621	0.84317	down-regulated		AC078851.1	-1.10634	0.661649	0.0187366	0.727062	down-regulated		LINC01099	-1.01159	0.332153	0.00479036	0.154528	down-regulated
AC105180.1	-1.27196	-0.106666	0.0207817	0.846959	down-regulated		AC023078.5	-1.48488	-1.33692	0.0187999	0.727062	down-regulated		AL356489.1	-1.39509	-0.498392	0.00484143	0.154528	down-regulated
AL358333.3	-1.48455	0.809779	0.0211124	0.847787	down-regulated		AC022336.2	-1.08193	-1.35473	0.0189282	0.727062	down-regulated		AC005823.1	-1.60667	-1.1668	0.00485998	0.154691	down-regulated
AL353597.2	-1.79281	5.98514	0.0213979	0.850427	down-regulated		AC087664.2	-1.59342	-1.34613	0.0202013	0.750843	down-regulated		C16orf47	-1.10771	0.931302	0.00505692	0.15883	down-regulated
LINC01018	-1.02053	6.52603	0.0214332	0.850427	down-regulated		AC097494.1	-2.31201	-1.31261	0.0210873	0.765959	down-regulated		LINC01998	-1.52174	-1.03904	0.00506728	0.15883	down-regulated
AC074344.2	-1.15462	-0.150251	0.0214782	0.850427	down-regulated		AC090970.1	-1.42055	0.139636	0.0212736	0.769581	down-regulated		AC125603.1	-1.42544	-0.693035	0.00512875	0.160407	down-regulated
AP006216.1	-1.41657	-0.000976271	0.0215741	0.851847	down-regulated		AP000221.1	-1.90767	-1.00313	0.0214458	0.770776	down-regulated		AC027281.1	-1.22101	0.98194	0.0051634	0.160811	down-regulated
AC126323.5	-1.68998	-1.00863	0.0219031	0.85312	down-regulated		AL031595.3	-1.40447	9.85498	0.0215309	0.770776	down-regulated		Z85994.1	-1.41922	-0.63099	0.0052128	0.160937	down-regulated
AC026904.2	-1.32324	-0.248673	0.0219073	0.85312	down-regulated		PAup-regulatedAR	-1.53887	-1.24741	0.0220266	0.774334	down-regulated		AP001360.1	-1.07419	-1.13618	0.00523979	0.161191	down-regulated
AC087633.2	-2.56141	-0.610725	0.0221675	0.858536	down-regulated		AC069235.1	-1.33439	-1.39889	0.0221792	0.774334	down-regulated		MAST4-IT1	-1.02208	3.15074	0.00527191	0.161721	down-regulated
TTC21B-AS1	-1.00553	2.06742	0.0227901	0.873108	down-regulated		AC021087.4	-1.89605	0.53	0.0225688	0.784128	down-regulated		LINC01924	-1.35712	-1.2222	0.00535352	0.162567	down-regulated
AC025187.1	-1.86349	-1.24837	0.0229703	0.877638	down-regulated		AP006216.1	-1.25399	-0.00693141	0.0228533	0.788302	down-regulated		AF121898.1	-1.41545	-1.07032	0.00540733	0.163435	down-regulated
AC079763.1	-1.05428	-0.591666	0.0234155	0.882752	down-regulated		AC105343.1	-1.2112	-1.29391	0.023192	0.791268	down-regulated		AC087392.2	-1.12093	0.774491	0.00575573	0.170386	down-regulated
AC055717.1	-1.82116	-0.356712	0.0236501	0.884815	down-regulated		AC024028.1	-2.25812	-1.30172	0.0244743	0.815889	down-regulated		AC024230.1	-1.43614	0.562649	0.00583302	0.171265	down-regulated
AC034245.1	-2.58555	-1.18271	0.0238224	0.884815	down-regulated		AC104777.2	-1.51581	-1.39918	0.024828	0.81731	down-regulated		AC009502.1	-1.4134	-0.684177	0.00593852	0.17295	down-regulated
AL121721.1	-2.62393	-0.941884	0.0240123	0.884815	down-regulated		AL356961.1	-1.07159	-1.25563	0.0251437	0.81731	down-regulated		AC099398.1	-1.11429	-0.323583	0.00688243	0.190418	down-regulated
AC007557.2	-1.62458	-1.07524	0.0240846	0.884815	down-regulated		AC011396.1	-1.2454	-1.37886	0.0251612	0.81731	down-regulated		AC005858.1	-1.36238	2.79144	0.00713965	0.193678	down-regulated
EGFLAM-AS2	-1.05972	-0.436378	0.0242435	0.884815	down-regulated		AL732372.2	-1.12476	-1.26856	0.0273056	0.852949	down-regulated		AC113404.1	-1.36024	-0.701206	0.00727519	0.195641	down-regulated
AC022447.6	-1.96212	6.47811	0.024383	0.884815	down-regulated		TRPC7-AS2	-1.31524	0.382876	0.0276418	0.856897	down-regulated		AC087430.1	-1.33813	-1.14501	0.00731053	0.195866	down-regulated
LINC02383	-2.39348	-0.303192	0.0243874	0.884815	down-regulated		AC016642.1	-2.28913	-1.23239	0.0288139	0.873467	down-regulated		AP001604.1	-1.39681	-1.15605	0.00740765	0.196306	down-regulated
AJ003147.2	-1.11237	-0.142725	0.0245097	0.884815	down-regulated		LINC00903	-1.01831	-0.243752	0.0297596	0.888595	down-regulated		AC009133.3	-1.44465	5.14362	0.00766751	0.200568	down-regulated
AL158834.1	-1.61634	3.83175	0.0245314	0.884815	down-regulated		AC145543.1	-1.1302	-1.39706	0.0297763	0.888595	down-regulated		AC022511.1	-1.03479	1.93662	0.00794891	0.203852	down-regulated
AC112518.1	-1.14769	-0.947903	0.025225	0.900664	down-regulated		LINC02388	-1.75804	0.691338	0.0298791	0.888595	down-regulated		AL445483.1	-1.22902	2.12947	0.00802326	0.205393	down-regulated
AL354896.1	-2.77095	-0.938861	0.0254636	0.904102	down-regulated		MIR1-1HG	-1.98214	2.35666	0.0306215	0.898351	down-regulated		LINC01949	-1.34661	-1.19837	0.00832367	0.210092	down-regulated
AC092143.3	-1.17489	-0.957868	0.026341	0.921934	down-regulated		AL136528.2	-1.41083	2.96541	0.030838	0.898351	down-regulated		AL365265.1	-1.0383	-1.19977	0.00861966	0.215672	down-regulated
AC007952.8	-1.83178	5.70411	0.0271146	0.939731	down-regulated		AL031770.1	-1.18333	4.46918	0.0315899	0.909394	down-regulated		AC090377.1	-1.28867	-1.10487	0.00892238	0.220045	down-regulated
AC008770.4	-1.2244	5.65492	0.0273946	0.944812	down-regulated		AL357793.1	-1.23087	1.82618	0.0316745	0.909394	down-regulated		AL357833.2	-1.35566	-1.12757	0.00927119	0.225551	down-regulated
FAM230B	-2.10931	-1.16666	0.0278024	0.95391	down-regulated		AC008464.1	-2.13545	-1.14616	0.0321448	0.915586	down-regulated		AC231533.1	-1.13893	-0.109051	0.00933803	0.22557	down-regulated
AC044839.1	-2.69759	-1.11861	0.0278744	0.95391	down-regulated		LINC01102	-2.01862	-0.963683	0.0331237	0.927875	down-regulated		LINC01187	-1.0648	1.62336	0.00956297	0.229077	down-regulated
AC023078.5	-1.86529	-1.23831	0.0281967	0.95391	down-regulated		AC009154.1	-1.21333	-1.00132	0.0333233	0.927875	down-regulated		PP12613	-1.45957	-1.10694	0.0095694	0.229077	down-regulated
AP001120.1	-1.02257	0.42887	0.0283054	0.955307	down-regulated		LINC01370	-1.3003	-0.770671	0.03373	0.93482	down-regulated		AL109924.2	-1.3238	-0.764889	0.00976362	0.233338	down-regulated
AC005303.1	-2.23869	-1.25156	0.0289234	0.964192	down-regulated		AL445471.2	-2.22641	-1.20817	0.0358235	0.958529	down-regulated		AC008825.1	-1.51971	-1.17944	0.00979994	0.233817	down-regulated
MLIP-AS1	-2.11814	-0.978603	0.0289768	0.964192	down-regulated		AC090403.1	-1.85969	-0.741867	0.035825	0.958529	down-regulated		LINC02163	-1.52523	1.59039	0.00991376	0.236141	down-regulated
AL583808.2	-2.29795	-1.24865	0.0293131	0.966309	down-regulated		AC026461.2	-2.05449	-1.26442	0.036019	0.959274	down-regulated		LINC01584	-1.33744	-0.910614	0.0101361	0.239454	down-regulated
AC084757.2	-2.73635	-1.05414	0.0294873	0.969796	down-regulated		AC034245.1	-2.23246	-1.27485	0.0360625	0.959274	down-regulated		AL161938.1	-1.00448	-1.09102	0.0101668	0.239786	down-regulated
AL135818.2	-1.01032	5.19443	0.029679	0.969931	down-regulated		LINC01056	-1.21405	0.416445	0.0365193	0.959274	down-regulated		AC090458.1	-1.1751	-0.890446	0.0102207	0.240662	down-regulated
C5orf66-AS2	-1.65006	4.24603	0.0302891	0.973242	down-regulated		AL357832.2	-2.17928	-1.21094	0.0367638	0.959274	down-regulated		LINC01556	-1.02793	1.40392	0.0110352	0.250811	down-regulated
AL162430.2	-1.26323	5.37391	0.0307877	0.97851	down-regulated		AL159166.1	-1.56272	-1.27502	0.0370732	0.959274	down-regulated		LINC01514	-1.1734	-1.00511	0.0113189	0.254844	down-regulated
AL157414.2	-1.72916	-0.826083	0.0314697	0.993835	down-regulated		AC096759.1	-1.49962	-1.31808	0.0370921	0.959274	down-regulated		AC084116.2	-1.13349	-1.23671	0.0114035	0.255548	down-regulated
AL590369.1	-1.0412	3.20642	0.0323562	1	down-regulated		LINC02307	-1.09386	1.08383	0.0378847	0.959274	down-regulated		AC069277.1	-1.39921	0.814629	0.0119102	0.264841	down-regulated
Z98742.1	-1.26269	-1.22444	0.0323871	1	down-regulated		AC087565.1	-1.51531	6.03596	0.0386878	0.967396	down-regulated		AL359924.1	-1.4187	-0.794071	0.0121752	0.267787	down-regulated
AC120042.2	-1.44383	-1.24357	0.0327873	1	down-regulated		AC099786.2	-1.59326	-1.12302	0.0389181	0.968856	down-regulated		LINC00488	-1.46201	-1.09505	0.0122	0.267787	down-regulated
AC015853.2	-2.61929	-0.789976	0.0329427	1	down-regulated		AL359551.1	-1.83209	-0.992845	0.0390266	0.96953	down-regulated		AC078906.1	-1.29204	-0.838971	0.0123342	0.269684	down-regulated
AC067817.1	-2.58377	-1.1143	0.033285	1	down-regulated		AC091053.1	-1.2707	2.77311	0.0393218	0.971291	down-regulated		LINC02000	-1.07814	-1.00645	0.012415	0.270373	down-regulated
AC018814.1	-1.0227	-1.10605	0.0337905	1	down-regulated		AC011396.3	-1.09701	-1.35929	0.0393739	0.971291	down-regulated		AC009988.1	-1.05637	-1.01137	0.0124671	0.270535	down-regulated
AP000289.1	-1.09739	1.16161	0.0337973	1	down-regulated		LINC01900	-2.03925	-1.19099	0.0404473	0.976963	down-regulated		AL390838.1	-1.33811	-0.879976	0.01282	0.275554	down-regulated
LINC01671	-1.04156	2.53675	0.0339429	1	down-regulated		AC012613.1	-2.14694	-1.10847	0.0407879	0.976963	down-regulated		AL121781.1	-1.21395	-0.680209	0.0128274	0.275554	down-regulated
AL450322.2	-1.67923	5.18317	0.0341681	1	down-regulated		C10orf71-AS1	-1.95532	0.0813487	0.0410167	0.976963	down-regulated		AC024028.1	-1.08333	-1.19273	0.0135539	0.28761	down-regulated
AC108074.1	-1.19843	-1.21129	0.0345829	1	down-regulated		KCNQ5-AS1	-1.15665	0.836386	0.0410757	0.976963	down-regulated		AC009318.4	-1.02247	3.09699	0.0136241	0.288548	down-regulated
AC012668.2	-1.13474	-1.0633	0.0346649	1	down-regulated		AC128707.1	-1.09884	-1.26071	0.0411734	0.976963	down-regulated		AC100791.1	-1.41088	-1.03978	0.0148473	0.305155	down-regulated
C10orf71-AS1	-2.54254	0.11161	0.0355351	1	down-regulated		LINC02023	-1.86491	-1.32908	0.041257	0.976963	down-regulated		AC093536.2	-1.08993	-1.24026	0.0150411	0.308258	down-regulated
DSCR10	-1.06598	-0.220963	0.035667	1	down-regulated		AJ003147.1	-1.31994	-0.210718	0.0419186	0.983616	down-regulated		AC092335.1	-1.22824	0.87769	0.0152101	0.309078	down-regulated
LINC02388	-2.10905	0.731882	0.0357866	1	down-regulated		AC022294.1	-1.19347	2.54216	0.0433753	0.997289	down-regulated		AC098798.1	-1.19358	-0.910555	0.0155069	0.313449	down-regulated
LINC02011	-2.28846	-1.16625	0.0359115	1	down-regulated		AC139426.2	-1.3333	1.69541	0.0435707	0.997289	down-regulated		TUSC7	-1.31998	-0.786736	0.0159376	0.319798	down-regulated
AC133528.1	-1.25076	7.53463	0.0361652	1	down-regulated		AP003049.2	-1.24866	-1.26277	0.0437686	0.997289	down-regulated		AC108748.1	-1.20705	-0.578023	0.0164991	0.325614	down-regulated
AC004551.1	-1.26784	0.0270887	0.0363529	1	down-regulated		AP001961.1	-1.25722	2.85945	0.0439396	0.997289	down-regulated		AL121885.2	-1.10706	-1.15165	0.0165612	0.325674	down-regulated
AC004149.1	-1.13957	-0.464053	0.0366003	1	down-regulated		LINC01486	-1.00213	-1.00502	0.0440959	0.997289	down-regulated		AC089987.2	-1.26946	-1.09297	0.0170401	0.330845	down-regulated
AC099792.1	-2.20279	-0.654841	0.0374251	1	down-regulated		AC093607.1	-1.92338	-1.32948	0.0446068	0.998402	down-regulated		AL163195.2	-1.19299	-1.13979	0.0172605	0.334221	down-regulated
AL161616.2	-1.34544	-1.15658	0.0375934	1	down-regulated		A2ML1-AS1	-1.49468	-1.05271	0.0458985	1	down-regulated		AC106875.1	-1.2428	0.438118	0.0180023	0.342592	down-regulated
TTTY21B	-1.58464	3.82041	0.0378797	1	down-regulated		AC074091.1	-1.51078	-1.22361	0.0477874	1	down-regulated		AL161751.1	-1.37202	-0.889939	0.0180705	0.343435	down-regulated
AC079305.1	-1.00031	2.65859	0.0384829	1	down-regulated		COL18A1-AS1	-1.84684	-0.849382	0.0480895	1	down-regulated		AL591030.2	-1.07245	-1.12371	0.0183242	0.347339	down-regulated
AC018618.1	-2.29526	-0.6727	0.0387413	1	down-regulated		LINC01639	-1.52063	-1.31172	0.04856	1	down-regulated		AC099509.1	-1.30979	-0.685443	0.0185193	0.348525	down-regulated
AC022294.1	-1.38903	2.78776	0.0390624	1	down-regulated		AC138761.4	-1.97737	-0.964463	0.0485882	1	down-regulated		AC092620.1	-1.02371	-0.0388324	0.0186274	0.348525	down-regulated
AC022517.1	-1.36309	2.74523	0.0394986	1	down-regulated		FAM230B	-1.82683	-1.24892	0.0490118	1	down-regulated		LINC00029	-1.36048	-1.03652	0.0186833	0.349026	down-regulated
AC016903.1	-1.09182	-0.538005	0.0399968	1	down-regulated		AL157871.6	-1.13291	4.86917	0.0492081	1	down-regulated		AC068075.1	-1.09844	1.37143	0.0188176	0.350231	down-regulated
Z94160.1	-1.16496	2.8975	0.0404508	1	down-regulated		AC016994.1	-1.98576	-1.27958	0.0494322	1	down-regulated		AL513314.1	-1.19569	-0.708954	0.0200739	0.366036	down-regulated
AC015878.1	-2.31743	1.29888	0.0407695	1	down-regulated									AL022344.2	-1.18614	4.14915	0.0204595	0.369331	down-regulated
AC034238.2	-1.55798	4.0971	0.0413037	1	down-regulated									AL928921.1	-1.12402	0.0929086	0.0206441	0.371259	down-regulated
AC037441.2	-2.23096	-0.711349	0.041398	1	down-regulated									LINC02355	-1.42192	-1.02012	0.0210493	0.375881	down-regulated
LINC02246	-1.32596	9.29322	0.0417954	1	down-regulated									AC016134.1	-1.00582	-0.879564	0.0210841	0.375881	down-regulated
AL136528.2	-1.53313	3.31336	0.0422094	1	down-regulated									AC079610.3	-1.07982	-0.146444	0.0212113	0.377216	down-regulated
LINC02249	-2.49135	-1.1872	0.0422958	1	down-regulated									AC063976.1	-1.23125	-1.17246	0.0213001	0.377799	down-regulated
AC002454.1	-1.06242	2.76894	0.0432078	1	down-regulated									AC078962.1	-1.13033	0.0110207	0.0216146	0.380451	down-regulated
LINC01070	-1.50604	2.73209	0.0435585	1	down-regulated									AP001180.1	-1.05436	-1.04484	0.0229995	0.393922	down-regulated
AP001059.3	-1.27848	-1.22272	0.0438185	1	down-regulated									LINC02224	-1.24057	-1.05455	0.0230543	0.393922	down-regulated
AP001021.2	-1.92196	-0.366202	0.044072	1	down-regulated									AC079098.1	-1.13159	-1.2585	0.0248743	0.413719	down-regulated
AC063949.2	-1.35137	1.40187	0.0441018	1	down-regulated									AC097515.1	-1.16246	0.627033	0.0249089	0.413797	down-regulated
AC090821.1	-1.39534	-1.22275	0.0442798	1	down-regulated									HMMR-AS1	-1.27214	-1.153	0.0251587	0.416523	down-regulated
AL008638.2	-1.12409	-1.14387	0.0458512	1	down-regulated									CR382287.2	-1.31682	-1.18607	0.0253045	0.417099	down-regulated
AC068489.1	-2.1308	-1.16359	0.0482107	1	down-regulated									AC067968.2	-1.14465	-0.915334	0.0253095	0.417099	down-regulated
AC091564.6	-1.34959	5.54031	0.0484229	1	down-regulated									LINC00382	-1.01443	-1.10585	0.0268551	0.427079	down-regulated
AC008073.1	-1.64537	-0.357289	0.049172	1	down-regulated									LINC00380	-1.17332	-1.19359	0.0269058	0.427079	down-regulated
AC108463.3	-1.61804	-0.470205	0.0495491	1	down-regulated									AC092625.1	-1.06119	-1.15526	0.0273038	0.430244	down-regulated
AL137071.1	-1.20685	-0.883058	0.0495624	1	down-regulated									AC027627.1	-1.13374	-1.14194	0.0294282	0.444225	down-regulated
														AC006333.1	-1.24231	-1.10601	0.0301161	0.450272	down-regulated
														AL355810.1	-1.03914	0.644675	0.0303271	0.45199	down-regulated
														AC138089.1	-1.15389	1.43084	0.0304829	0.453055	down-regulated
														AC010982.1	-1.18043	-0.957864	0.0308649	0.456376	down-regulated
														LINC02109	-1.11369	-0.329683	0.0321165	0.464397	down-regulated
														AC019254.2	-1.02341	-1.0115	0.032292	0.46505	down-regulated
														LINC00977	-1.16102	-1.07767	0.0326337	0.467165	down-regulated
														AC113189.4	-1.22121	-0.901851	0.0326812	0.46738	down-regulated
														AC115837.2	-1.19831	4.89226	0.0346178	0.48167	down-regulated
														AL356133.2	-1.03006	3.95879	0.0347648	0.482127	down-regulated
														AL353658.1	-1.04836	-1.18664	0.0352166	0.48482	down-regulated
														LINC00993	-1.26943	4.01262	0.035389	0.48482	down-regulated
														AC009623.1	-1.18042	-1.20174	0.0355227	0.484881	down-regulated
														AC006387.1	-1.04296	-0.489313	0.0369507	0.49801	down-regulated
														AC007731.4	-1.14589	-0.75641	0.0378404	0.504825	down-regulated
														CECR3	-1.14129	-0.585006	0.0385022	0.510076	down-regulated
														AC104462.2	-1.05219	-1.14908	0.0392975	0.516794	down-regulated
														LINC02392	-1.15516	-1.11854	0.0407358	0.52562	down-regulated
														AC109597.1	-1.1512	-1.01621	0.041299	0.529156	down-regulated
														LINC02333	-1.16985	-1.07272	0.0425444	0.537616	down-regulated
														LINC00905	-1.25133	-1.11181	0.0428536	0.539872	down-regulated
														up-regulatedP2-IT1	-1.05842	-1.03813	0.0431285	0.541363	down-regulated
														AC093642.1	-1.12328	-0.937875	0.0446376	0.5503	down-regulated
														AC079354.3	-1.00498	-0.620221	0.0449438	0.551954	down-regulated
														AC073188.6	-1.00344	-0.531008	0.045606	0.556321	down-regulated
														AC091544.5	-1.06774	6.01962	0.0457326	0.556646	down-regulated
														CADM2-AS2	-1.075	-1.14123	0.0472864	0.567096	down-regulated
														AC138356.3	-1.02346	-1.11255	0.0476461	0.568548	down-regulated
														LINC00477	-1.11917	-1.11045	0.0478064	0.568892	down-regulated
														AL590609.3	-1.08211	-1.19517	0.0486635	0.574923	down-regulated

## Sheet: DNA methylation
Supplementary Table 1D. Race differences in DNA methylation level.
Black vs Asian									White vs Asian									White vs Black
Methylation	logFC	AveExpr	t	P.Value	adj.P.Val	B	expression		Methylation	logFC	AveExpr	t	P.Value	adj.P.Val	B	expression		Methylation	logFC	AveExpr	t	P.Value	adj.P.Val	B	expression
SPATA2	0.0219397	0.423708	4.9211	5.66966e-06	0.07524	2.33106	up-regulated-regulated		MIR651	0.0643185	0.945904	8.124	4.98706e-15	1.4464e-10	22.4864	up-regulated		RP11-283C24.1	0.0405556	0.956199	10.4145	5.43594e-23	1.57659e-18	39.9208	up-regulated
MIR612	0.131445	0.796037	4.84353	7.59118e-06	0.07524	2.0461	up-regulated-regulated		CUZD1	0.0661163	0.78372	6.06189	2.97798e-09	4.31851e-05	9.41691	up-regulated		RP11-96C23.10	0.0337812	0.434273	8.84373	1.87979e-17	1.81732e-13	27.2759	up-regulated
SLC25A24	0.0933706	0.402176	4.83688	7.78264e-06	0.07524	2.0218	up-regulated-regulated		C10orf120	0.0956041	0.87035	5.7753	1.4882e-08	0.000143875	7.84779	up-regulated		RP1-35C21.2	0.314658	0.721382	8.12362	4.03014e-15	2.3328e-11	21.9693	up-regulated
ATXN7L2	0.0386321	0.182833	4.59522	1.90607e-05	0.0959782	1.14939	up-regulated-regulated		BSN-AS2	0.11364	0.876806	5.47859	7.36792e-08	0.000444697	6.2919	up-regulated		SNORD3B-2	0.0302958	0.0753977	8.09866	4.82598e-15	2.3328e-11	21.7913	up-regulated
EPS8	0.0144487	0.277559	4.58628	1.9695e-05	0.0959782	1.11757	up-regulated-regulated		RNF31	0.0978274	0.780776	5.47106	7.66639e-08	0.000444697	6.25333	up-regulated		DEFB4B	0.0691495	0.792646	7.82523	3.38306e-14	9.81188e-11	19.8695	up-regulated
HINT1	0.0111309	0.111136	4.58406	1.98555e-05	0.0959782	1.10968	up-regulated-regulated		MS4A5	0.0682077	0.658124	5.41602	1.02341e-07	0.000494701	5.97286	up-regulated		SLC35A5	0.0302428	0.601986	7.74854	5.78949e-14	1.29164e-10	19.3396	up-regulated
RP11-137N23.1	0.137224	0.698253	4.48254	2.87369e-05	0.104414	0.750667	up-regulated-regulated		KCNE1	0.0253764	0.426259	5.30652	1.80554e-07	0.000748089	5.42216	up-regulated		FAM27E4	0.0881867	0.84455	7.62797	1.3368e-13	2.76938e-10	18.5146	up-regulated
RP11-477D19.2	0.0963263	0.803415	4.40133	3.85174e-05	0.111712	0.466664	up-regulated-regulated		LINC01343	0.0484672	0.477744	4.96059	1.01934e-06	0.00369549	3.7477	up-regulated		LA16c-OS12.2	0.058178	0.853239	7.37365	7.56057e-13	1.3705e-09	16.8078	up-regulated
COL6A4P2	0.0649132	0.753709	4.3516	4.60269e-05	0.121356	0.294182	up-regulated-regulated		RPF2	0.0221358	0.131619	4.85947	1.66023e-06	0.00535017	3.27719	up-regulated		JAK2	0.01497	0.437405	7.33353	9.89714e-13	1.68851e-09	16.5427	up-regulated
CCAR1	0.0280858	0.168477	4.32536	5.05439e-05	0.12216	0.203592	up-regulated-regulated		ABCC12	0.0694483	0.537024	4.77247	2.50943e-06	0.00647746	2.87928	up-regulated		MIR662	0.067428	0.406189	7.31129	1.14845e-12	1.85046e-09	16.3963	up-regulated
CTD-3064M3.4	0.0820236	0.394298	4.24119	6.81135e-05	0.151961	-0.0847809	up-regulated-regulated		HERC2P9	0.055735	0.579241	4.77129	2.52338e-06	0.00647746	2.87394	up-regulated		TTTY22	0.205454	0.710103	7.22435	2.0478e-12	3.12591e-09	15.8272	up-regulated
SRP14	0.0119137	0.108237	4.16839	8.79554e-05	0.158438	-0.331504	up-regulated-regulated		C12orf5	0.0150603	0.424258	4.74693	2.82961e-06	0.00647746	2.76371	up-regulated		ANKRD26P3	0.0524773	0.366811	7.05038	6.41141e-12	9.29751e-09	14.7048	up-regulated
RNF31	0.0902017	0.76045	4.12269	0.000103148	0.158438	-0.485078	up-regulated-regulated		MS4A13	0.101724	0.832855	4.71613	3.26821e-06	0.00647746	2.62508	up-regulated		PAGE2	0.0656041	0.801631	6.83744	2.51695e-11	3.19379e-08	13.3613	up-regulated
YPEL1	0.0231117	0.325126	4.10759	0.000108705	0.158438	-0.535619	up-regulated-regulated		RP11-477D19.2	0.0984759	0.819297	4.71483	3.28813e-06	0.00647746	2.61924	up-regulated		DYNLL1P2	0.10449	0.682175	6.77571	3.71875e-11	4.27345e-08	12.9781	up-regulated
DNAJA2	0.0139389	0.346606	4.08061	0.000119357	0.158438	-0.625617	up-regulated-regulated		C2orf74	0.0171382	0.68173	4.71083	3.35006e-06	0.00647746	2.60129	up-regulated		NCBP1	0.0123782	0.106474	6.77099	3.83097e-11	4.27345e-08	12.9489	up-regulated
SCRIB	0.0150915	0.581468	4.07646	0.000121079	0.158438	-0.63941	up-regulated-regulated		TRHR	0.178976	0.595294	4.60155	5.54878e-06	0.0100582	2.11645	up-regulated		SNRPCP2	0.0454229	0.850622	6.53739	1.63506e-10	1.63523e-07	11.5257	up-regulated
EPS8L3	0.0543183	0.821739	4.06946	0.000124046	0.158438	-0.662701	up-regulated-regulated		RP11-525A16.4	0.0513547	0.354066	4.55473	6.86727e-06	0.0113445	1.91188	up-regulated		RP11-25I15.3	0.090599	0.8738	6.52992	1.71161e-10	1.65473e-07	11.4808	up-regulated
RP11-265N6.3	0.157035	0.640147	4.06652	0.00012531	0.158438	-0.67246	up-regulated-regulated		RP11-19O2.2	0.180156	0.809147	4.54923	7.0407e-06	0.0113445	1.88795	up-regulated		RP11-395L14.11	0.0396179	0.821424	6.49153	2.16377e-10	1.96112e-07	11.2511	up-regulated
MS4A5	0.0681906	0.648343	4.05935	0.000128447	0.158438	-0.696248	up-regulated-regulated		LPAL2	0.0620382	0.43991	4.52281	7.93327e-06	0.0115105	1.7735	up-regulated		RRM2P2	0.0898946	0.723724	6.48439	2.25997e-10	1.97317e-07	11.2085	up-regulated
RNF139	0.0159051	0.0689575	4.04556	0.000134701	0.158438	-0.741974	up-regulated-regulated		CYP2C8	0.0387026	0.211439	4.52269	7.93748e-06	0.0115105	1.77299	up-regulated		MYO18B	0.032233	0.623298	6.39823	3.80748e-10	2.98455e-07	10.6976	up-regulated
ALG12	0.0111905	0.243995	4.0162	0.000149002	0.158438	-0.838978	up-regulated-regulated		GJA10	0.107927	0.602935	4.47692	9.74795e-06	0.0127219	1.5761	up-regulated		RP11-196D18.2	0.145643	0.755616	6.21981	1.10176e-09	7.79374e-07	9.65784	up-regulated
CDC34	0.0132753	0.497226	4.00518	0.000154737	0.158438	-0.875264	up-regulated-regulated		GKN1	0.0716598	0.629133	4.45565	1.07184e-05	0.0127219	1.48522	up-regulated		CLK3P2	0.121054	0.394436	6.14615	1.69642e-09	1.17146e-06	9.23587	up-regulated
PRTG	0.0356621	0.383163	4.00351	0.000155625	0.158438	-0.880767	up-regulated-regulated		RP11-256I23.1	0.0350992	0.89628	4.45488	1.07551e-05	0.0127219	1.48194	up-regulated		RP5-857K21.4	0.0599957	0.258308	6.13663	1.79316e-09	1.20946e-06	9.18167	up-regulated
TPSB2	0.110985	0.648282	3.99922	0.000157931	0.158438	-0.894893	up-regulated-regulated		FAAHP1	0.0293964	0.455924	4.45319	1.08366e-05	0.0127219	1.47471	up-regulated		RP11-284J1.1	0.044583	0.883224	5.88443	7.60238e-09	4.24023e-06	7.77135	up-regulated
RBM15B	0.0471056	0.366523	3.98713	0.000164596	0.158438	-0.934601	up-regulated-regulated		UNC79	0.0936292	0.603699	4.45052	1.0966e-05	0.0127219	1.46335	up-regulated		ZNF705G	0.0832997	0.838608	5.86082	8.68115e-09	4.75055e-06	7.64195	up-regulated
RP13-977J11.9	0.0836131	0.592722	3.98019	0.000168544	0.158438	-0.957358	up-regulated-regulated		ANTXR1	0.0254337	0.424962	4.43595	1.1699e-05	0.0128812	1.40141	up-regulated		ZDHHC11	0.0157407	0.632021	5.83728	9.90504e-09	5.31992e-06	7.51335	up-regulated
MAGI3	0.0144465	0.193989	3.97736	0.00017018	0.158438	-0.966633	up-regulated-regulated		LINC01254	0.0938442	0.869892	4.43038	1.19916e-05	0.0128812	1.37776	up-regulated		LYPLA1P3	0.102035	0.817086	5.81848	1.10019e-08	5.69801e-06	7.41097	up-regulated
SERTAD3	0.0203501	0.134486	3.97399	0.000172144	0.158438	-0.977652	up-regulated-regulated		TMEM178B	0.0167136	0.337547	4.41074	1.30798e-05	0.0135212	1.29464	up-regulated		MARK2P6	0.0644317	0.840823	5.75071	1.60281e-08	7.87905e-06	7.0443	up-regulated
MIR937	0.0726468	0.695289	3.96441	0.000177859	0.158438	-1.009	up-regulated-regulated		FAM90A1	0.124114	0.789829	4.40324	1.35198e-05	0.0135212	1.26299	up-regulated		RP11-864N7.2	0.0316525	0.921114	5.71985	1.90015e-08	9.18499e-06	6.87855	up-regulated
PRB1	0.0790786	0.64755	3.96046	0.000180273	0.158438	-1.02194	up-regulated-regulated		CTD-2659N19.4	0.0581861	0.89657	4.37879	1.50552e-05	0.0140854	1.16011	up-regulated		TRIM50	0.0320489	0.567092	5.68852	2.2567e-08	1.05566e-05	6.71109	up-regulated
OSCP1	0.0245383	0.118952	3.94157	0.00019223	0.163978	-1.08356	up-regulated-regulated		RP11-444A22.1	0.0847474	0.823035	4.36147	1.62421e-05	0.0143969	1.08757	up-regulated		GRAP	0.0342978	0.858634	5.65805	2.66552e-08	1.22711e-05	6.54902	up-regulated
AC092570.2	0.093604	0.694357	3.93175	0.000198743	0.16469	-1.11552	up-regulated-regulated		NANOGNB	0.0583573	0.402682	4.35952	1.6381e-05	0.0143969	1.07943	up-regulated		FAM90A6P	0.0715599	0.912622	5.59802	3.69256e-08	1.67336e-05	6.23188	up-regulated
PDCD6	0.0430875	0.660269	3.90289	0.00021914	0.171776	-1.20919	up-regulated-regulated		OR1F12	0.121947	0.825553	4.35139	1.6973e-05	0.0144785	1.0455	up-regulated		LCOR	0.0176301	0.341515	5.57079	4.27679e-08	1.9083e-05	6.08902	up-regulated
RP5-933K21.3	0.0109584	0.075596	3.89052	0.000228489	0.174391	-1.24922	up-regulated-regulated		RP11-861A13.3	0.0915446	0.870816	4.32595	1.89622e-05	0.0154266	0.939622	up-regulated		FAM90A11P	0.0846494	0.865415	5.37643	1.19964e-07	4.97045e-05	5.087	up-regulated
KRT1	0.0580832	0.467665	3.86724	0.000247115	0.177942	-1.32428	up-regulated-regulated		RP5-842K16.1	0.0424976	0.89522	4.3237	1.91483e-05	0.0154266	0.930295	up-regulated		SPATC1L	0.0283921	0.641857	5.29315	1.84909e-07	7.24717e-05	4.66729	up-regulated
GUCY2GP	0.037166	0.266051	3.86048	0.000252797	0.177942	-1.34604	up-regulated-regulated		AC130709.1	0.0755943	0.796649	4.31027	2.02969e-05	0.01591	0.87466	up-regulated		AC131056.3	0.0511275	0.734934	5.28965	1.88279e-07	7.28088e-05	4.64977	up-regulated
SRSF11	0.0994305	0.61854	3.85814	0.000254792	0.177942	-1.35357	up-regulated-regulated		RP11-753D20.1	0.0984185	0.544828	4.30312	2.09347e-05	0.0159781	0.84512	up-regulated		FLJ26245	0.0297659	0.959401	5.27382	2.04281e-07	7.59584e-05	4.5707	up-regulated
RP11-332L8.1	0.0496324	0.918403	3.85063	0.000261291	0.177942	-1.37767	up-regulated-regulated		CHRNB2	0.0493205	0.453546	4.28444	2.26929e-05	0.0168407	0.768142	up-regulated		AC005387.2	0.0170687	0.970912	5.22027	2.68789e-07	9.42712e-05	4.30475	up-regulated
KRT6C	0.0731566	0.614462	3.84277	0.000268269	0.177942	-1.40289	up-regulated-regulated		POLR2J	0.0299662	0.429332	4.27301	2.38375e-05	0.0168407	0.721184	up-regulated		HLA-DPB1	0.0328411	0.383177	5.20022	2.9769e-07	0.000101575	4.20583	up-regulated
COPB1	0.0119897	0.087335	3.82436	0.00028531	0.179226	-1.46181	up-regulated-regulated		RP11-33B1.4	0.0421574	0.898015	4.26479	2.4695e-05	0.0168407	0.687468	up-regulated		FAM90A4P	0.0895	0.911497	5.15888	3.67113e-07	0.000120993	4.00286	up-regulated
MIF4GD	0.0143117	0.119072	3.81695	0.000292459	0.179226	-1.48548	up-regulated-regulated		CTAGE16P	0.181227	0.835699	4.26247	2.49422e-05	0.0168407	0.677964	up-regulated		RP11-863P13.1	0.0430283	0.940649	5.08831	5.23366e-07	0.000164991	3.65974	up-regulated
PFDN6	0.0499278	0.523247	3.80785	0.000301473	0.179226	-1.5145	up-regulated-regulated		NDN	0.0758022	0.494017	4.25792	2.54331e-05	0.0168407	0.659374	up-regulated		MIR2116	0.0105521	0.926322	5.04329	6.54807e-07	0.000195787	3.44309	up-regulated
RP11-371I20.2	0.0175448	0.178691	3.80193	0.000307476	0.179226	-1.53335	up-regulated-regulated		SLC22A2	0.0402887	0.667141	4.25686	2.55487e-05	0.0168407	0.655046	up-regulated		LCT	0.02742	0.808989	5.00669	7.84714e-07	0.00022989	3.2682	up-regulated
CCNT1	0.0271947	0.266969	3.77613	0.00033502	0.187028	-1.61532	up-regulated-regulated		DDX53	0.135708	0.532767	4.23265	2.83366e-05	0.0182633	0.556286	up-regulated		RP11-266K4.1	0.0698651	0.804894	4.99784	8.19654e-07	0.000233063	3.22611	up-regulated
MIR1282	0.0681614	0.517803	3.77582	0.000335361	0.187028	-1.61629	up-regulated-regulated		MIR518A2	0.129417	0.776905	4.21046	3.11439e-05	0.0196362	0.466252	up-regulated		MARK2P17	0.0233693	0.867123	4.96415	9.67032e-07	0.000267113	3.06642	up-regulated
ATP5B	0.0376624	0.174204	3.75615	0.000357943	0.187028	-1.67852	up-regulated-regulated		CTA-384D8.34	0.064381	0.922271	4.17041	3.68947e-05	0.0223577	0.304852	up-regulated		BPIFA3	0.037104	0.451104	4.9548	1.01229e-06	0.000276977	3.02225	up-regulated
BAG5	0.0231509	0.894933	3.74757	0.000368252	0.187028	-1.70562	up-regulated-regulated		TARM1	0.0564381	0.293549	4.16668	3.748e-05	0.0223577	0.289866	up-regulated		FLJ33360	0.0697978	0.856991	4.93943	1.09114e-06	0.000293023	2.94984	up-regulated
TBC1D22B	0.0194541	0.244498	3.74507	0.000371304	0.187028	-1.71349	up-regulated-regulated		CKMT1A	0.0956983	0.700733	4.16483	3.77729e-05	0.0223577	0.282457	up-regulated		ALG1L	0.0781442	0.488254	4.93721	1.10302e-06	0.000293495	2.93939	up-regulated
VRK2	0.0115458	0.276777	3.73174	0.000387997	0.187028	-1.75545	up-regulated-regulated		SPINT4	0.0550343	0.279008	4.15023	4.01627e-05	0.0232968	0.224066	up-regulated		RNF219	0.020562	0.33346	4.90833	1.26923e-06	0.000331636	2.80394	up-regulated
CARKD	0.0191752	0.489819	3.72682	0.000394341	0.187028	-1.77092	up-regulated-regulated		MYH14	0.0348509	0.491509	4.14137	4.16831e-05	0.0237046	0.188708	up-regulated		RP11-58O9.2	0.0433825	0.737042	4.87756	1.47285e-06	0.000370443	2.66042	up-regulated
DHFR	0.0145373	0.212015	3.72638	0.000394913	0.187028	-1.77231	up-regulated-regulated		HNRNPLP2	0.0922188	0.610034	4.10577	4.83644e-05	0.0269191	0.0473109	up-regulated		RP11-495K9.2	0.0219781	0.197927	4.87455	1.49439e-06	0.000370443	2.64641	up-regulated
SLIRP	0.0148003	0.518707	3.72465	0.000397167	0.187028	-1.77774	up-regulated-regulated		C11orf74	0.0321283	0.305379	4.09665	5.02329e-05	0.0269191	0.0112758	up-regulated		ZYG11B	0.0148558	0.254729	4.86431	1.56999e-06	0.000382641	2.59883	up-regulated
HJURP	0.0131219	0.358552	3.72264	0.000399813	0.187028	-1.78407	up-regulated-regulated		ANKRD20A1	0.0646859	0.438977	4.0936	5.08726e-05	0.0269191	-0.000751396	up-regulated		RP11-778J16.2	0.037185	0.30094	4.85631	1.63158e-06	0.000387874	2.56173	up-regulated
SEPT7P2	0.0169918	0.411159	3.71489	0.000410128	0.188808	-1.80836	up-regulated-regulated		RP4-639J15.2	0.0296133	0.484675	4.09277	5.10481e-05	0.0269191	-0.00402437	up-regulated		RP11-552F3.12	0.0318602	0.864247	4.82387	1.90598e-06	0.0004458	2.41189	up-regulated
DTYMK	0.0237653	0.373323	3.69844	0.000432899	0.189604	-1.85987	up-regulated-regulated		FXYD6P1	0.0812585	0.865191	4.0869	5.23055e-05	0.0270896	-0.0271498	up-regulated		CATSPER2	0.0122223	0.607919	4.81466	1.99165e-06	0.000458442	2.36953	up-regulated
MIR635	0.050936	0.867244	3.69721	0.000434655	0.189604	-1.86373	up-regulated-regulated		COL6A4P2	0.0566315	0.754956	4.0767	5.45627e-05	0.0277628	-0.0672937	up-regulated		RP11-672A2.1	0.0617779	0.867265	4.81021	2.03441e-06	0.000464599	2.34906	up-regulated
IK	0.0128441	0.157074	3.69256	0.000441329	0.189604	-1.87825	up-regulated-regulated		OR3A2	0.0837778	0.372111	4.06735	5.67111e-05	0.0280521	-0.103982	up-regulated		FAM90A8P	0.0631592	0.746445	4.80606	2.07502e-06	0.000470171	2.33001	up-regulated
RPL13AP5	0.0528354	0.401594	3.69016	0.000444817	0.189604	-1.88575	up-regulated-regulated		AC096579.13	0.156934	0.615712	4.06438	5.74092e-05	0.0280521	-0.115603	up-regulated		NF2	0.0119712	0.213356	4.80004	2.13538e-06	0.00047856	2.30239	up-regulated
LINC01343	0.0484609	0.470799	3.6899	0.000445187	0.189604	-1.88654	up-regulated-regulated		RP11-142L4.2	0.210276	0.692256	4.06176	5.80328e-05	0.0280521	-0.125864	up-regulated		RARRES2P8	0.0555099	0.839982	4.79591	2.17776e-06	0.000479023	2.28346	up-regulated
C2orf74	0.0189044	0.680739	3.68291	0.000455498	0.189604	-1.90835	up-regulated-regulated		RP11-481J13.1	0.0633755	0.433481	4.04534	6.20913e-05	0.0294844	-0.190052	up-regulated		AC108479.1	0.049029	0.590568	4.74179	2.81354e-06	0.000595628	2.03683	up-regulated
DHRS4	0.0344086	0.283397	3.67619	0.000465627	0.189604	-1.9293	up-regulated-regulated		BANF1P2	0.0418591	0.393186	4.02668	6.70314e-05	0.0303767	-0.262716	up-regulated		TERF1P4	0.0718208	0.796217	4.71055	3.25826e-06	0.00067985	1.89562	up-regulated
MIR651	0.0624887	0.935178	3.67175	0.000472433	0.189604	-1.94312	up-regulated-regulated		IGSF5	0.0201642	0.558604	4.017	6.97368e-05	0.0311165	-0.300259	up-regulated		FAM90A14P	0.0995131	0.836216	4.69321	3.5337e-06	0.000726864	1.81757	up-regulated
RP11-532N4.2	0.165238	0.74178	3.67047	0.000474402	0.189604	-1.94708	up-regulated-regulated		TEX26-AS1	0.081527	0.386563	4.01251	7.10283e-05	0.0312126	-0.317668	up-regulated		HARS2	0.022588	0.849402	4.68688	3.63967e-06	0.000740405	1.78915	up-regulated
CYP4F29P	0.112509	0.538152	3.66863	0.000477259	0.189604	-1.9528	up-regulated-regulated		AC007381.2	0.0771062	0.429565	4.00789	7.23799e-05	0.0313218	-0.335549	up-regulated		LRWD1	0.0326261	0.830359	4.66625	4.00662e-06	0.000801406	1.6968	up-regulated
DHX16	0.0107838	0.37007	3.66448	0.000483768	0.189604	-1.9657	up-regulated-regulated		NAPSB	0.0528927	0.379832	4.00237	7.40267e-05	0.0313218	-0.356887	up-regulated		ELK2AP	0.0406906	0.884726	4.65937	4.13662e-06	0.000816153	1.6661	up-regulated
PRB3	0.0963832	0.589292	3.64575	0.000514216	0.196234	-2.02379	up-regulated-regulated		CLEC4D	0.0425351	0.209903	4.00036	7.46344e-05	0.0313218	-0.36464	up-regulated		AKAP3	0.0133616	0.367828	4.62135	4.9323e-06	0.000943604	1.49706	up-regulated
MED31	0.0649694	0.431695	3.63334	0.000535385	0.201659	-2.06217	up-regulated-regulated		CCL4	0.0951399	0.585289	3.99721	7.55966e-05	0.0313218	-0.376788	up-regulated		FAM66D	0.0274606	0.499389	4.62078	4.94528e-06	0.000943604	1.49453	up-regulated
MUTYH	0.0105541	0.200251	3.62758	0.000545488	0.202326	-2.07995	up-regulated-regulated		TWIST2	0.0665923	0.604424	3.99172	7.7304e-05	0.0315781	-0.397966	up-regulated		AHSP	0.0668161	0.357834	4.6083	5.23769e-06	0.000974759	1.43936	up-regulated
AC011453.1	0.08887	0.596574	3.62147	0.000556404	0.202326	-2.0988	up-regulated-regulated		SLFN14	0.170268	0.699272	3.9869	7.88304e-05	0.0317544	-0.416505	up-regulated		AC011524.1	0.122731	0.786006	4.5942	5.58828e-06	0.00101935	1.37714	up-regulated
SLMO2	0.0263428	0.366914	3.62054	0.000558082	0.202326	-2.10166	up-regulated-regulated		AGA	0.0198586	0.321951	3.98235	8.0302e-05	0.0319041	-0.434038	up-regulated		MTATP8P1	0.10019	0.345649	4.58173	5.91689e-06	0.00105931	1.32228	up-regulated
LCMT1-AS1	0.0297394	0.302485	3.60717	0.000582783	0.20552	-2.14283	up-regulated-regulated		COX8C	0.0507025	0.677945	3.9749	8.27633e-05	0.0324376	-0.462654	up-regulated		VN1R64P	0.1057	0.765964	4.57544	6.08978e-06	0.00108357	1.29463	up-regulated
ZNF782	0.0331999	0.279169	3.60531	0.000586294	0.20552	-2.14854	up-regulated-regulated		RP11-826N14.4	0.158527	0.741012	3.96216	8.71373e-05	0.0330634	-0.511458	up-regulated		RP11-572C21.1	0.0604275	0.531356	4.51576	7.98846e-06	0.00135491	1.03428	up-regulated
ATRIP	0.0132302	0.285871	3.60433	0.00058815	0.20552	-2.15154	up-regulated-regulated		OR2AG2	0.193647	0.732149	3.96178	8.72733e-05	0.0330634	-0.512935	up-regulated		RP11-154D9.1	0.0600876	0.348111	4.48798	9.05475e-06	0.00148188	0.91417	up-regulated
RPL21	0.033929	0.678363	3.5986	0.000599151	0.206871	-2.16915	up-regulated-regulated		REG1B	0.128749	0.771886	3.96034	8.77801e-05	0.0330634	-0.51842	up-regulated		CTD-2014E2.5	0.0912986	0.594878	4.47095	9.7748e-06	0.0015662	0.840847	up-regulated
OR1F12	0.124745	0.81041	3.58088	0.000634396	0.213857	-2.22344	up-regulated-regulated		ZNF415	0.0503823	0.915636	3.94875	9.19804e-05	0.0338429	-0.562697	up-regulated		IGHV3-49	0.0380958	0.339141	4.44637	1.0911e-05	0.00166553	0.735517	up-regulated
EAPP	0.0242628	0.299302	3.57703	0.000642298	0.213857	-2.2352	up-regulated-regulated		RP11-346J10.3	0.0222179	0.437098	3.94716	9.25723e-05	0.0338429	-0.568773	up-regulated		TMEM132D	0.0405521	0.488273	4.40413	1.31655e-05	0.00194816	0.555709	up-regulated
METTL23	0.0683616	0.73997	3.57265	0.000651409	0.213857	-2.24857	up-regulated-regulated		GGT8P	0.0873459	0.697635	3.94393	9.37848e-05	0.0338429	-0.581097	up-regulated		AP006294.2	0.0317782	0.772485	4.40273	1.32473e-05	0.00195031	0.549783	up-regulated
PAXBP1-AS1	0.0100403	0.175772	3.57035	0.00065625	0.213857	-2.2556	up-regulated-regulated		BCAR4	0.0357276	0.206295	3.94199	9.45168e-05	0.0338429	-0.58846	up-regulated		DEFB105A	0.0703196	0.861485	4.38535	1.43051e-05	0.00206701	0.476284	up-regulated
BSN-AS2	0.0996845	0.848971	3.56232	0.000673417	0.216293	-2.28011	up-regulated-regulated		AC006335.10	0.107335	0.853943	3.93211	9.83455e-05	0.0347843	-0.626059	up-regulated		GAGE13	0.0869641	0.90601	4.38415	1.43807e-05	0.00206701	0.471241	up-regulated
RP11-524N5.1	0.0525731	0.449966	3.55991	0.000678642	0.216293	-2.28745	up-regulated-regulated		LINC01056	0.112894	0.507042	3.92415	0.000101535	0.0353689	-0.656273	up-regulated		RPL21P121	0.0231091	0.890869	4.38391	1.43963e-05	0.00206701	0.470207	up-regulated
RP11-962G15.1	0.0931012	0.298305	3.55362	0.000692472	0.217005	-2.30659	up-regulated-regulated		APLF	0.0300418	0.341953	3.92007	0.000103211	0.0353689	-0.671766	up-regulated		SLC35G3	0.0777607	0.554591	4.37418	1.50273e-05	0.00211145	0.429179	up-regulated
HNRNPA0	0.0135097	0.130844	3.55211	0.000695839	0.217005	-2.31119	up-regulated-regulated		APOBEC1	0.129325	0.586545	3.91795	0.00010409	0.0353689	-0.679797	up-regulated		RP11-77I22.2	0.0571826	0.819044	4.35499	1.63495e-05	0.00222622	0.348546	up-regulated
FBXW5	0.0334896	0.687297	3.54271	0.000717104	0.218928	-2.33975	up-regulated-regulated		MAS1	0.0928324	0.799807	3.91607	0.000104876	0.0353689	-0.686919	up-regulated		LINC01547	0.0183595	0.552644	4.34687	1.69421e-05	0.00228546	0.314507	up-regulated
AC009065.2	0.0210034	0.101809	3.51782	0.000776458	0.224981	-2.41514	up-regulated-regulated		MIR937	0.0667229	0.699935	3.90857	0.000108066	0.0360257	-0.715267	up-regulated		LINC01347	0.0318303	0.563358	4.33374	1.79437e-05	0.00235485	0.259614	up-regulated
AC008753.4	0.0680857	0.830969	3.51731	0.00077772	0.224981	-2.41668	up-regulated-regulated		NLRP9	0.0626537	0.502852	3.9044	0.000109881	0.0362144	-0.731025	up-regulated		RP11-848P1.9	0.0301142	0.557176	4.32935	1.82912e-05	0.00238964	0.241284	up-regulated
ZDHHC17	0.0150418	0.256976	3.51711	0.000778218	0.224981	-2.41728	up-regulated-regulated		NLRP13	0.115532	0.795205	3.89721	0.000113077	0.0365268	-0.758151	up-regulated		RP11-160E2.6	0.0141649	0.0544799	4.31622	1.93684e-05	0.00247491	0.186615	up-regulated
RP11-158M2.5	0.0129052	0.459511	3.51242	0.000789945	0.224981	-2.43146	up-regulated-regulated		AC079612.1	0.0901714	0.609915	3.89661	0.000113347	0.0365268	-0.760409	up-regulated		SERBP1P1	0.018958	0.66429	4.31427	1.95333e-05	0.00247491	0.178516	up-regulated
RPL10	0.0110878	0.0784132	3.51029	0.000795311	0.224981	-2.43787	up-regulated-regulated		AC010970.2	0.0667722	0.340181	3.88906	0.000116802	0.0372266	-0.788807	up-regulated		RP11-339B21.11	0.0255023	0.843566	4.31418	1.95412e-05	0.00247491	0.178129	up-regulated
RP11-861A13.3	0.0977557	0.862853	3.50817	0.000800688	0.224981	-2.44425	up-regulated-regulated		ARHGAP23P1	0.118494	0.68381	3.88463	0.00011888	0.0374768	-0.805477	up-regulated		AL359737.1	0.0469571	0.410196	4.30227	2.05797e-05	0.00252912	0.128675	up-regulated
MYH14	0.0372742	0.488527	3.50447	0.000810175	0.224981	-2.45541	up-regulated-regulated		RP11-137N23.1	0.123283	0.704355	3.8782	0.000121951	0.0380318	-0.829598	up-regulated		DEFB105B	0.0748736	0.834144	4.29157	2.15574e-05	0.00260512	0.0843546	up-regulated
CTA-384D8.34	0.0683563	0.916346	3.50398	0.000811448	0.224981	-2.4569	up-regulated-regulated		IL21-AS1	0.0492232	0.353445	3.87509	0.000123465	0.0380941	-0.841259	up-regulated		HEPH	0.0593875	0.610997	4.2867	2.2017e-05	0.00264962	0.0642134	up-regulated
CCNH	0.0221307	0.170873	3.5028	0.000814503	0.224981	-2.46046	up-regulated-regulated		AF064860.5	0.0525467	0.467892	3.87132	0.000125324	0.0382606	-0.855385	up-regulated		ANKRD36BP1	0.0176895	0.917265	4.27712	2.29489e-05	0.00273276	0.0246375	up-regulated
SOX5	0.0828209	0.473157	3.48898	0.000851053	0.231973	-2.50203	up-regulated-regulated		ABCB10P1	0.0752042	0.633189	3.86581	0.000128088	0.0386974	-0.876011	up-regulated		RP11-21B23.3	0.0735276	0.466023	4.2767	2.29905e-05	0.00273276	0.0229115	up-regulated
SLC35A2	0.0125875	0.106438	3.48722	0.000855812	0.231973	-2.50731	up-regulated-regulated		RP11-815D16.1	0.11959	0.788953	3.85932	0.000131419	0.0392341	-0.90027	up-regulated		EEF1DP5	0.0192363	0.830519	4.27089	2.35742e-05	0.00277936	-0.00101996	up-regulated
BOP1	0.0120321	0.399208	3.48177	0.000870733	0.232782	-2.52367	up-regulated-regulated		RP11-436I9.6	0.203006	0.77334	3.85711	0.000132571	0.0392341	-0.908514	up-regulated		CTA-299D3.8	0.0699817	0.841612	4.26779	2.38917e-05	0.00280539	-0.0137889	up-regulated
OTUD3	0.018457	0.207284	3.47669	0.000884859	0.232782	-2.5389	up-regulated-regulated		DPPA3	0.125914	0.725132	3.84549	0.000138793	0.0406607	-0.951847	up-regulated		RP13-582O9.5	0.0215473	0.620066	4.25519	2.52243e-05	0.00293372	-0.0655803	up-regulated
UQCRFS1	0.0852902	0.776199	3.46972	0.000904583	0.232782	-2.55976	up-regulated-regulated		ZNF735	0.0428941	0.377314	3.83825	0.000142806	0.0406799	-0.978772	up-regulated		CTD-2130O13.1	0.0337769	0.860799	4.24707	2.61215e-05	0.00298268	-0.0989213	up-regulated
AC004156.3	0.0227986	0.192841	3.46869	0.000907547	0.232782	-2.56285	up-regulated-regulated		WNT7A	0.0657558	0.406791	3.83595	0.000144101	0.0406799	-0.987296	up-regulated		TUBB8P5	0.0776457	0.859021	4.23132	2.79466e-05	0.00309365	-0.163338	up-regulated
AC023115.2	0.0493124	0.530217	3.46683	0.000912895	0.232782	-2.56841	up-regulated-regulated		DHX16	0.0105239	0.371361	3.83502	0.000144629	0.0406799	-0.990752	up-regulated		RP11-191L9.4	0.0925645	0.625521	4.22437	2.87903e-05	0.00317492	-0.191698	up-regulated
HSPA9	0.0115999	0.353368	3.46664	0.000913441	0.232782	-2.56898	up-regulated-regulated		CTB-191K22.6	0.100077	0.466301	3.83085	0.000147019	0.0406799	-1.00622	up-regulated		DCAF4L1	0.0130444	0.588563	4.22189	2.90978e-05	0.00319668	-0.201829	up-regulated
YIPF1	0.0284465	0.408599	3.46611	0.000914978	0.232782	-2.57057	up-regulated-regulated		A2MP1	0.0943566	0.603941	3.82575	0.000149994	0.0406799	-1.02514	up-regulated		AC004951.6	0.0126171	0.922305	4.21791	2.95957e-05	0.00321485	-0.218005	up-regulated
AF064860.5	0.0612642	0.467591	3.45939	0.000934604	0.233675	-2.59064	up-regulated-regulated		AC011513.3	0.0562054	0.323029	3.82572	0.000150011	0.0406799	-1.02525	up-regulated		OR2AE1	0.0138314	0.280896	4.21171	3.039e-05	0.00328882	-0.243253	up-regulated
TMEM26	0.11085	0.56526	3.45372	0.000951482	0.234907	-2.60757	up-regulated-regulated		MIR518A1	0.0538614	0.541688	3.8256	0.000150079	0.0406799	-1.02568	up-regulated		TRPC5	0.0371786	0.745503	4.20386	3.14242e-05	0.00335072	-0.275146	up-regulated
KCNMB3	0.0201369	0.414168	3.45133	0.000958695	0.234907	-2.61471	up-regulated-regulated		AC006372.5	0.0840071	0.513979	3.8221	0.000152153	0.04086	-1.03863	up-regulated		CMA1	0.0471328	0.518027	4.18538	3.3992e-05	0.00352097	-0.349994	up-regulated
RP11-230C9.1	0.192899	0.65893	3.44963	0.00096383	0.234907	-2.61976	up-regulated-regulated		NBPF22P	0.123846	0.709586	3.81648	0.000155545	0.0413878	-1.05945	up-regulated		PSG9	0.048149	0.560657	4.17537	3.54662e-05	0.00364761	-0.390435	up-regulated
CTB-58E17.5	0.0155048	0.048358	3.44526	0.000977181	0.235985	-2.63277	up-regulated-regulated		RP11-93O17.2	0.0725426	0.900036	3.8081	0.000160726	0.0423775	-1.09037	up-regulated		CTD-2299N12.1	0.112458	0.763439	4.16209	3.75155e-05	0.00376492	-0.44393	up-regulated
LRRC52	0.0724143	0.471701	3.44198	0.000987353	0.235985	-2.64256	up-regulated-regulated		CTD-2643K12.1	0.0553555	0.827169	3.80039	0.000165638	0.0429195	-1.11877	up-regulated		CSTL1	0.0170948	0.527674	4.15411	3.87999e-05	0.00384066	-0.475984	up-regulated
EIF2S2	0.0133209	0.12957	3.44027	0.000992662	0.235985	-2.64763	up-regulated-regulated		OR1N1	0.116873	0.616665	3.80023	0.000165741	0.0429195	-1.11936	up-regulated		FAM197Y5	0.0633155	0.838971	4.1433	4.06079e-05	0.00395218	-0.519338	up-regulated
ARF1	0.0154528	0.248228	3.42962	0.00102649	0.242043	-2.67929	up-regulated-regulated		RP11-690I21.2	0.0237989	0.945739	3.79651	0.000168165	0.0431618	-1.13306	up-regulated		RP11-134K13.2	0.0339663	0.821067	4.14118	4.09725e-05	0.00396108	-0.527845	up-regulated
EIF3B	0.0152624	0.487056	3.42116	0.00105409	0.244933	-2.70435	up-regulated-regulated		MIR154	0.165259	0.579978	3.79186	0.000171238	0.0433228	-1.15014	up-regulated		RP11-547C5.2	0.0505105	0.821658	4.13749	4.16118e-05	0.0039981	-0.542581	up-regulated
RN7SL605P	0.060064	0.47875	3.4207	0.00105563	0.244933	-2.70574	up-regulated-regulated		PPP1R2P2	0.0926648	0.83972	3.79105	0.000171779	0.0433228	-1.15312	up-regulated		PRSS45	0.0274542	0.6622	4.13535	4.19873e-05	0.004019	-0.55113	up-regulated
AC005593.2	0.0101753	0.0640753	3.41527	0.00107374	0.24521	-2.7218	up-regulated-regulated		MIR515-2	0.080951	0.606415	3.78559	0.000175469	0.0438719	-1.17316	up-regulated		ANP32D	0.0337141	0.601578	4.11475	4.57746e-05	0.00427881	-0.633296	up-regulated
SF3B3	0.0493064	0.652769	3.41158	0.00108623	0.245423	-2.73272	up-regulated-regulated		ANKRD30BP2	0.0972749	0.454213	3.7828	0.000177381	0.0439708	-1.18338	up-regulated		RP11-798K23.3	0.0811753	0.68562	4.1142	4.58818e-05	0.00427881	-0.635521	up-regulated
RPLP2	0.0940031	0.567695	3.41001	0.0010916	0.245423	-2.73737	up-regulated-regulated		MIR517B	0.0805099	0.382153	3.77402	0.000183537	0.0451113	-1.21555	up-regulated		TPTE2P6	0.0165167	0.327819	4.076	5.37983e-05	0.00487774	-0.786859	up-regulated
BET1L	0.0110244	0.139299	3.40537	0.00110756	0.247097	-2.75108	up-regulated-regulated		FAM90A6P	0.0932287	0.918801	3.75964	0.000194048	0.0468999	-1.26804	up-regulated		RP11-166O4.1	0.0143572	0.560206	4.07526	5.39638e-05	0.00487774	-0.789777	up-regulated
PCBP1-AS1	0.0362847	0.360666	3.39437	0.0011463	0.250853	-2.78353	up-regulated-regulated		YIPF1	0.0286898	0.412909	3.75038	0.000201117	0.0480842	-1.30175	up-regulated		HPR	0.0134375	0.548559	4.07008	5.51339e-05	0.00494819	-0.810163	up-regulated
RP11-815D16.1	0.111676	0.765272	3.39317	0.00115059	0.250853	-2.78705	up-regulated-regulated		MIR521-2	0.115807	0.75899	3.74588	0.000204638	0.0480842	-1.3181	up-regulated		ADAM6	0.0422141	0.665318	4.06943	5.52831e-05	0.00494819	-0.81273	up-regulated
ZNF598	0.0180758	0.727672	3.39262	0.00115256	0.250853	-2.78867	up-regulated-regulated		AC008067.2	0.0584626	0.434864	3.74374	0.000206334	0.0480842	-1.32588	up-regulated		TDG	0.0262315	0.357025	4.06871	5.54481e-05	0.00494819	-0.815562	up-regulated
RP11-563J2.3	0.0496358	0.852062	3.38867	0.00116685	0.250853	-2.80029	up-regulated-regulated		RP11-542M13.3	0.0949256	0.320439	3.74361	0.000206437	0.0480842	-1.32635	up-regulated		SLX1B-SULT1A4	0.0293212	0.85574	4.06439	5.64501e-05	0.00502215	-0.832578	up-regulated
PCGF5	0.0121675	0.293214	3.38846	0.00116764	0.250853	-2.80093	up-regulated-regulated		MIR7160	0.0635539	0.654866	3.7392	0.000209968	0.0480842	-1.34232	up-regulated		RP11-285M22.2	0.0542389	0.563425	4.03342	6.41478e-05	0.00555367	-0.953988	up-regulated
GBA	0.0125106	0.0484346	3.38485	0.00118085	0.251825	-2.81154	up-regulated-regulated		DPRX	0.0355367	0.796472	3.73592	0.00021264	0.0480842	-1.35423	up-regulated		PARP4P2	0.0309317	0.368947	4.02419	6.66286e-05	0.00563731	-0.990009	up-regulated
CTD-2659N19.4	0.0577335	0.887863	3.37341	0.00122368	0.253696	-2.84514	up-regulated-regulated		CTD-3187F8.2	0.0627842	0.398925	3.73367	0.000214485	0.0480842	-1.36236	up-regulated		AC006335.6	0.0479673	0.911302	4.02339	6.68472e-05	0.00563731	-0.993117	up-regulated
MS4A8	0.0447242	0.388326	3.37323	0.00122437	0.253696	-2.84567	up-regulated-regulated		SAMD4A	0.0387959	0.492973	3.73061	0.000217025	0.0480842	-1.37345	up-regulated		RP11-107C10.1	0.0768918	0.758148	4.01298	6.97631e-05	0.00583809	-1.03364	up-regulated
RPL37A	0.0289828	0.448255	3.37202	0.00122897	0.253696	-2.84921	up-regulated-regulated		SSX9	0.148668	0.722118	3.7302	0.000217361	0.0480842	-1.37491	up-regulated		CST8	0.0476013	0.866544	4.01053	7.04648e-05	0.00585585	-1.04314	up-regulated
CTB-113P19.4	0.0344365	0.359491	3.37034	0.00123541	0.253696	-2.85413	up-regulated-regulated		OR3A3	0.135001	0.712462	3.72816	0.000219073	0.0480842	-1.38229	up-regulated		CTD-2122P11.1	0.0914802	0.876231	4.00196	7.29794e-05	0.00601313	-1.0764	up-regulated
TIRAP	0.0137618	0.158717	3.3686	0.00124211	0.253696	-2.85923	up-regulated-regulated		ATXN7L2	0.0299323	0.179911	3.72811	0.000219116	0.0480842	-1.38248	up-regulated		LINC01498	0.0302899	0.142589	3.99799	7.41744e-05	0.00607836	-1.09181	up-regulated
ARHGAP11B	0.0106557	0.0812401	3.36378	0.00126086	0.254131	-2.87336	up-regulated-regulated		MRGPRX4	0.0653277	0.485489	3.72322	0.000223268	0.0480842	-1.40015	up-regulated		RNA5SP378	0.0303654	0.429433	3.99187	7.60502e-05	0.00617839	-1.1155	up-regulated
STK35	0.0154636	0.200779	3.36245	0.00126609	0.254131	-2.87726	up-regulated-regulated		RP11-1166P10.1	0.0821342	0.642589	3.72266	0.000223752	0.0480842	-1.40219	up-regulated		RP11-25I15.2	0.0376236	0.393144	3.9863	7.7795e-05	0.0062555	-1.13701	up-regulated
BBS7	0.0115095	0.0837572	3.35947	0.00127784	0.254131	-2.88596	up-regulated-regulated		MIR520G	0.0911435	0.553362	3.72258	0.000223817	0.0480842	-1.40246	up-regulated		RP11-416N13.1	0.0305472	0.595466	3.98069	7.95937e-05	0.00634315	-1.15869	up-regulated
YWHAB	0.0112318	0.264135	3.35911	0.00127929	0.254131	-2.88703	up-regulated-regulated		CPXM2	0.0742838	0.387513	3.70603	0.000238453	0.0505377	-1.46208	up-regulated		AL162586.1	0.0243463	0.384567	3.98014	7.97719e-05	0.00634315	-1.16081	up-regulated
AGA	0.0216159	0.320563	3.35263	0.00130525	0.255785	-2.90596	up-regulated-regulated		LOR	0.106017	0.394481	3.70574	0.000238722	0.0505377	-1.46314	up-regulated		RP1-40G4P.1	0.0327512	0.785625	3.97997	7.9828e-05	0.00634315	-1.16147	up-regulated
RP3-418C23.2	0.0522199	0.377389	3.34652	0.00133018	0.257438	-2.92379	up-regulated-regulated		RNA5SP359	0.0804706	0.580885	3.69906	0.000244891	0.0511615	-1.48714	up-regulated		RP11-542M13.2	0.0699853	0.756923	3.97312	8.20822e-05	0.00645552	-1.18788	up-regulated
RP4-655C5.4	0.0579053	0.509657	3.34438	0.00133901	0.257438	-2.93002	up-regulated-regulated		BSN	0.0411159	0.570741	3.69821	0.000245685	0.0511615	-1.49018	up-regulated		TSPY10	0.0754377	0.681937	3.97273	8.22124e-05	0.00645552	-1.18938	up-regulated
ACOX1	0.0173773	0.121054	3.34407	0.00134031	0.257438	-2.93094	up-regulated-regulated		ACSM4	0.105406	0.576541	3.6967	0.000247101	0.0511615	-1.49559	up-regulated		AC079767.3	0.0338678	0.821247	3.96672	8.42438e-05	0.00653516	-1.21252	up-regulated
PDCD1LG2	0.0634098	0.52248	3.33699	0.00136998	0.261405	-2.95155	up-regulated-regulated		CYP2B6	0.0983118	0.687215	3.69343	0.000250207	0.0511615	-1.50734	up-regulated		CKMT1A	0.0429843	0.698142	3.96663	8.42723e-05	0.00653516	-1.21284	up-regulated
RPL22L1	0.023013	0.222695	3.33034	0.00139843	0.261856	-2.9709	up-regulated-regulated		EXOC5P1	0.153958	0.696767	3.69313	0.000250489	0.0511615	-1.5084	up-regulated		RP11-134O21.1	0.0566334	0.518885	3.95905	8.69043e-05	0.00672129	-1.24199	up-regulated
LYZL1	0.089291	0.58143	3.3303	0.00139857	0.261856	-2.971	up-regulated-regulated		LINC01498	0.0593218	0.144644	3.68809	0.000255339	0.0516851	-1.52643	up-regulated		EEF1A1P13	0.0319123	0.582909	3.95448	8.85246e-05	0.00680095	-1.25949	up-regulated
CYB5D2	0.0104841	0.121433	3.32838	0.00140691	0.261856	-2.97659	up-regulated-regulated		LINC00540	0.0842793	0.378406	3.68678	0.000256617	0.0516851	-1.53113	up-regulated		FAM197Y1	0.0723329	0.768447	3.95166	8.95402e-05	0.0068161	-1.2703	up-regulated
CTSV	0.0250631	0.205321	3.3251	0.0014212	0.261856	-2.9861	up-regulated-regulated		RFPL3S	0.0285472	0.240144	3.6813	0.000262023	0.0524101	-1.55073	up-regulated		SEPHS1P1	0.0254917	0.559927	3.94564	9.17454e-05	0.0069294	-1.29335	up-regulated
RNF208	0.0539885	0.397018	3.32422	0.0014251	0.261856	-2.98868	up-regulated-regulated		SMARCE1P6	0.0652388	0.867008	3.67506	0.000268307	0.0532994	-1.57301	up-regulated		FRG2DP	0.0494259	0.821674	3.93629	9.52726e-05	0.00715853	-1.32909	up-regulated
ELMOD1	0.0264833	0.146318	3.32277	0.00143145	0.261856	-2.99287	up-regulated-regulated		RFPL4A	0.107908	0.455217	3.67219	0.000271243	0.053516	-1.58324	up-regulated		SLC5A2	0.0263962	0.598504	3.93095	9.73475e-05	0.00722089	-1.34949	up-regulated
PGBD5	0.0367395	0.622216	3.32185	0.00143554	0.261856	-2.99556	up-regulated-regulated		MIR329-1	0.167857	0.755266	3.66245	0.000281443	0.0548254	-1.61794	up-regulated		RP13-895J2.11	0.0170015	0.684647	3.92996	9.77341e-05	0.0072292	-1.35324	up-regulated
ZDHHC5	0.0113119	0.178894	3.31791	0.00145307	0.262453	-3.00697	up-regulated-regulated		MIR515-1	0.0797084	0.54309	3.66224	0.00028166	0.0548254	-1.61866	up-regulated		ESRRAP2	0.0169927	0.637047	3.92768	9.86356e-05	0.00724235	-1.36194	up-regulated
LRCOL1	0.0537692	0.455319	3.31705	0.00145692	0.262453	-3.00946	up-regulated-regulated		COPB1	0.0107982	0.087894	3.65279	0.000291902	0.0560687	-1.65222	up-regulated		DEFB104A	0.0588642	0.672703	3.92336	0.000100365	0.00733224	-1.3784	up-regulated
AC078899.1	0.152956	0.768095	3.31214	0.00147912	0.263711	-3.02369	up-regulated-regulated		OR2B11	0.111118	0.647058	3.64908	0.000296025	0.0560687	-1.66539	up-regulated		SPAG11B	0.0518077	0.722922	3.91971	0.000101848	0.00739161	-1.39229	up-regulated
OR6L1P	0.108432	0.755494	3.31149	0.00148209	0.263711	-3.02558	up-regulated-regulated		RP11-371I20.2	0.0157655	0.179474	3.64725	0.000298074	0.0560687	-1.67187	up-regulated		NSA2	0.0452937	0.612587	3.91948	0.000101943	0.00739161	-1.39316	up-regulated
PSMF1	0.0179794	0.314702	3.30417	0.00151581	0.266974	-3.04674	up-regulated-regulated		BAG5	0.0205173	0.895689	3.64625	0.000299204	0.0560687	-1.67543	up-regulated		KIR3DL1	0.0136052	0.320566	3.90526	0.000107925	0.00772878	-1.44714	up-regulated
RP11-465B22.3	0.0375437	0.329248	3.30352	0.00151883	0.266974	-3.04861	up-regulated-regulated		SCN8A	0.0310714	0.444225	3.64454	0.000301139	0.0560687	-1.68148	up-regulated		RP11-80F22.14	0.076574	0.818344	3.90252	0.000109115	0.00779477	-1.45752	up-regulated
KRT75	0.0598542	0.619696	3.30103	0.0015305	0.267303	-3.05581	up-regulated-regulated		RPL7AL2	0.0358944	0.225834	3.6409	0.00030529	0.0560687	-1.69434	up-regulated		PDLIM1P1	0.0206403	0.863336	3.89594	0.000112023	0.0079244	-1.48241	up-regulated
RP11-444D3.1	0.0610628	0.407086	3.28863	0.00158986	0.267303	-3.09158	up-regulated-regulated		PGD	0.0136889	0.162784	3.64081	0.000305392	0.0560687	-1.69465	up-regulated		MIR892C	0.12158	0.706385	3.88656	0.000116298	0.00806979	-1.51783	up-regulated
PMVK	0.0156733	0.162391	3.28565	0.00160442	0.267303	-3.10015	up-regulated-regulated		OR3A4P	0.151567	0.764682	3.6405	0.000305757	0.0560687	-1.69577	up-regulated		FANCD2	0.0123487	0.686389	3.88655	0.000116304	0.00806979	-1.51789	up-regulated
TMEM18	0.046537	0.744294	3.28041	0.00163035	0.267303	-3.11521	up-regulated-regulated		PFDN6	0.0453447	0.525943	3.63754	0.000309175	0.0560687	-1.70621	up-regulated		RP11-313I2.13	0.0654721	0.768671	3.87261	0.000122946	0.0084099	-1.57041	up-regulated
NAT9	0.0127987	0.140739	3.27986	0.00163314	0.267303	-3.11682	up-regulated-regulated		NPAP1	0.0830923	0.660792	3.63738	0.000309363	0.0560687	-1.70678	up-regulated		AP000275.64	0.168962	0.4356	3.86077	0.000128864	0.00871894	-1.61486	up-regulated
PTK6	0.0738059	0.423189	3.27612	0.00165189	0.267303	-3.12754	up-regulated-regulated		VN1R64P	0.16565	0.774303	3.63681	0.000310024	0.0560687	-1.70878	up-regulated		AC007403.2	0.0319795	0.885577	3.86057	0.000128967	0.00871894	-1.61561	up-regulated
TLK1	0.0218338	0.240826	3.27398	0.00166273	0.267303	-3.13369	up-regulated-regulated		ENAM	0.0582349	0.625291	3.63577	0.000311246	0.0560687	-1.71248	up-regulated		RP11-1094M14.1	0.0564956	0.855702	3.85627	0.000131183	0.00880718	-1.63172	up-regulated
FAHD1	0.0142039	0.121833	3.26999	0.00168314	0.267303	-3.14514	up-regulated-regulated		ANKRD20A9P	0.127014	0.542392	3.63254	0.000315046	0.056403	-1.72387	up-regulated		RP11-347H15.6	0.0572465	0.842487	3.85303	0.000132876	0.0088797	-1.64383	up-regulated
MIR518A1	0.0621476	0.540841	3.2672	0.00169754	0.267303	-3.15314	up-regulated-regulated		VCX3A	0.101495	0.521011	3.63056	0.000317404	0.0564547	-1.73087	up-regulated		RP11-568J23.1	0.0544977	0.735027	3.84402	0.000137697	0.0091597	-1.67752	up-regulated
ENGASE	0.0167471	0.496681	3.26713	0.0016979	0.267303	-3.15334	up-regulated-regulated		GRIK5	0.0545549	0.515953	3.62576	0.000323176	0.0564547	-1.74779	up-regulated		FRG2B	0.0960602	0.586801	3.83966	0.00014009	0.00927734	-1.6938	up-regulated
ATXN2L	0.0130776	0.223943	3.26626	0.00170243	0.267303	-3.15584	up-regulated-regulated		OLFM1	0.0618883	0.507528	3.62486	0.00032426	0.0564547	-1.75093	up-regulated		HERC2P9	0.0212225	0.578201	3.82948	0.00014583	0.00951911	-1.73172	up-regulated
ANKRD20A9P	0.135037	0.530852	3.2653	0.0017074	0.267303	-3.15858	up-regulated-regulated		RP11-282I1.1	0.052423	0.252954	3.62255	0.000327085	0.0564547	-1.75907	up-regulated		TSPY3	0.0719699	0.635826	3.82852	0.000146382	0.00951911	-1.7353	up-regulated
AC067945.4	0.0380457	0.14264	3.26313	0.00171873	0.267303	-3.16479	up-regulated-regulated		MIR323B	0.189927	0.759037	3.62087	0.000329154	0.0564547	-1.76499	up-regulated		DNM1P31	0.0605047	0.692133	3.81463	0.000154598	0.00989801	-1.78686	up-regulated
TRAV36DV7	0.140649	0.741119	3.25595	0.0017568	0.267303	-3.18536	up-regulated-regulated		FLJ43879	0.0767529	0.604688	3.6152	0.000336218	0.0564547	-1.78491	up-regulated		RP11-613E4.4	0.0434917	0.764528	3.80847	0.000158383	0.0100379	-1.8097	up-regulated
C12orf5	0.0153361	0.42233	3.25348	0.00177002	0.267303	-3.1924	up-regulated-regulated		TPSB2	0.0999556	0.653456	3.61275	0.000339323	0.0564547	-1.79354	up-regulated		CTC-360J11.4	0.0722221	0.871566	3.80706	0.000159259	0.0100413	-1.8149	up-regulated
AL022344.7	0.0491512	0.150486	3.25105	0.00178318	0.267303	-3.19934	up-regulated-regulated		YWHAB	0.0105649	0.265095	3.60992	0.000342925	0.0564547	-1.80345	up-regulated		EEF1A1P6	0.04189	0.572705	3.78065	0.00017658	0.0107591	-1.91231	up-regulated
AC073316.1	0.0197076	0.287831	3.24901	0.00179428	0.267303	-3.20517	up-regulated-regulated		PRB3	0.0880698	0.595015	3.60815	0.000345211	0.0564547	-1.80968	up-regulated		AL078471.5	0.029954	0.51724	3.77998	0.000177044	0.0107648	-1.91479	up-regulated
FGF2	0.0399963	0.494634	3.24791	0.00180029	0.267303	-3.2083	up-regulated-regulated		CYYR1	0.0845715	0.287248	3.60686	0.000346879	0.0564547	-1.8142	up-regulated		AC013402.5	0.0569257	0.489223	3.76858	0.000185074	0.0110903	-1.95662	up-regulated
FKBP1A	0.030856	0.204227	3.24706	0.00180497	0.267303	-3.21074	up-regulated-regulated		RGS6	0.085389	0.372508	3.60678	0.000346972	0.0564547	-1.81445	up-regulated		CTC-311G1.1	0.0855653	0.764708	3.76784	0.000185608	0.0110993	-1.95934	up-regulated
CNOT6	0.0128012	0.259256	3.24625	0.00180941	0.267303	-3.21305	up-regulated-regulated		PLEK	0.0363896	0.938656	3.60638	0.000347492	0.0564547	-1.81586	up-regulated		CTD-2234N14.2	0.0843581	0.76626	3.76537	0.000187398	0.0111604	-1.96839	up-regulated
PEX10	0.0837133	0.422655	3.24435	0.00181991	0.267303	-3.21848	up-regulated-regulated		HMGN1P32	0.0459871	0.825126	3.60285	0.000352105	0.0564547	-1.82823	up-regulated		RP11-384K6.2	0.0293362	0.760646	3.76351	0.000188759	0.0111954	-1.97521	up-regulated
ALG1	0.0195359	0.243265	3.24354	0.00182439	0.267303	-3.22078	up-regulated-regulated		SNRPD2P1	0.0708704	0.868746	3.60157	0.000353789	0.0564547	-1.8327	up-regulated		CTD-2318H23.1	0.0888728	0.756696	3.7541	0.000195776	0.0115174	-2.00962	up-regulated
BRD2	0.0191012	0.129039	3.24324	0.00182603	0.267303	-3.22163	up-regulated-regulated		AC127391.3	0.190327	0.687351	3.60115	0.000354343	0.0564547	-1.83417	up-regulated		FAM85B	0.014099	0.198785	3.75017	0.000198774	0.0116086	-2.02394	up-regulated
FAM122C	0.0127659	0.263234	3.23994	0.00184446	0.267303	-3.23105	up-regulated-regulated		INO80B-WBP1	0.0132397	0.133385	3.59831	0.000358119	0.0564547	-1.84411	up-regulated		CNDP1	0.0133274	0.573888	3.74997	0.000198927	0.0116086	-2.02466	up-regulated
RANBP2	0.0149957	0.29904	3.2363	0.00186496	0.267303	-3.24141	up-regulated-regulated		CSNK1A1P1	0.0485055	0.67093	3.5922	0.000366371	0.0564547	-1.86547	up-regulated		RP11-344L21.1	0.0347833	0.815407	3.74939	0.00019938	0.0116117	-2.02681	up-regulated
USP50	0.0108492	0.384748	3.23543	0.0018699	0.267303	-3.24389	up-regulated-regulated		PRIMA1	0.0802826	0.466934	3.59081	0.000368268	0.0564547	-1.87031	up-regulated		S100A14	0.0326191	0.690954	3.74831	0.000200209	0.0116195	-2.03072	up-regulated
AC009065.4	0.0127588	0.392228	3.23305	0.00188341	0.267303	-3.25064	up-regulated-regulated		TUBB3	0.037843	0.531429	3.59063	0.000368521	0.0564547	-1.87096	up-regulated		ACTBP8	0.0485541	0.886188	3.74818	0.000200316	0.0116195	-2.03122	up-regulated
RER1	0.0421821	0.79808	3.23166	0.00189137	0.267303	-3.2546	up-regulated-regulated		ALG1	0.0179714	0.244542	3.59047	0.000368733	0.0564547	-1.8715	up-regulated		GALM	0.0510116	0.317855	3.74488	0.000202889	0.0117219	-2.04325	up-regulated
ENAM	0.0556154	0.614782	3.23096	0.00189538	0.267303	-3.25658	up-regulated-regulated		TUBA3C	0.0861774	0.518738	3.59033	0.000368933	0.0564547	-1.87201	up-regulated		PSAT1P1	0.105688	0.698669	3.74365	0.000203852	0.0117541	-2.04771	up-regulated
TRHR	0.141289	0.53844	3.22919	0.00190559	0.267303	-3.26162	up-regulated-regulated		RP11-160N1.8	0.0888872	0.363694	3.58979	0.00036967	0.0564547	-1.87388	up-regulated		AP000351.13	0.0376518	0.806306	3.7371	0.000209075	0.0119602	-2.07154	up-regulated
EIF4A1	0.0294931	0.32351	3.22642	0.00192165	0.267303	-3.26949	up-regulated-regulated		ZSCAN5B	0.0410082	0.481222	3.5896	0.00036994	0.0564547	-1.87456	up-regulated		AC069363.1	0.0468562	0.430363	3.73317	0.000212271	0.0120715	-2.08583	up-regulated
C10orf120	0.0969877	0.857806	3.22391	0.00193635	0.267303	-3.27664	up-regulated-regulated		LILRA1	0.0775703	0.410413	3.58908	0.000370655	0.0564547	-1.87637	up-regulated		RP11-822E23.5	0.0221397	0.686392	3.7298	0.000215046	0.0121403	-2.09807	up-regulated
RP11-1094H24.3	0.0186059	0.143169	3.22254	0.00194435	0.267303	-3.2805	up-regulated-regulated		CTB-167G5.6	0.0564581	0.520875	3.58742	0.000372952	0.0564547	-1.88216	up-regulated		FGF23	0.0610097	0.582077	3.72967	0.000215154	0.0121403	-2.09854	up-regulated
PRSS29P	0.0610253	0.408143	3.21895	0.00196561	0.267303	-3.29069	up-regulated-regulated		RP11-583F24.4	0.150007	0.770696	3.58589	0.000375078	0.0564547	-1.88749	up-regulated		RP11-159J3.1	0.0133429	0.883858	3.72857	0.000216069	0.0121683	-2.10254	up-regulated
SRP9	0.0138127	0.156419	3.21805	0.00197096	0.267303	-3.29324	up-regulated-regulated		EMR1	0.0633921	0.551395	3.58485	0.000376524	0.0564547	-1.8911	up-regulated		AC005838.2	0.0542341	0.763005	3.72406	0.000219851	0.0123333	-2.11888	up-regulated
RP11-2E11.5	0.174194	0.545137	3.21739	0.00197492	0.267303	-3.29512	up-regulated-regulated		MS4A3	0.121793	0.481644	3.58296	0.000379188	0.0564547	-1.89771	up-regulated		RP5-874C20.8	0.0108812	0.245633	3.72144	0.000222078	0.0123451	-2.12837	up-regulated
RP11-370I10.4	0.152161	0.919945	3.21654	0.00197998	0.267303	-3.29752	up-regulated-regulated		AP001331.1	0.135184	0.77641	3.58156	0.000381159	0.0564547	-1.90257	up-regulated		RP11-313M3.1	0.0286362	0.276687	3.71128	0.000230921	0.0125891	-2.16513	up-regulated
CTD-3214H19.4	0.0100589	0.195747	3.21562	0.00198553	0.267303	-3.30014	up-regulated-regulated		MIR369	0.109414	0.690509	3.58095	0.000382032	0.0564547	-1.90471	up-regulated		RP11-340I6.6	0.0578804	0.782727	3.70821	0.000233657	0.0126668	-2.17622	up-regulated
PGD	0.0154754	0.162305	3.21389	0.00199591	0.267303	-3.30502	up-regulated-regulated		LINC01548	0.070409	0.462053	3.58008	0.000383258	0.0564547	-1.90771	up-regulated		SLFN12	0.0585205	0.335938	3.69965	0.00024145	0.0130281	-2.20709	up-regulated
DCN	0.0405732	0.415531	3.2126	0.00200372	0.267303	-3.30868	up-regulated-regulated		RP11-2E11.5	0.158345	0.554678	3.57903	0.000384755	0.0564547	-1.91137	up-regulated		AC113133.1	0.0137879	0.901305	3.68887	0.000251605	0.0133671	-2.24585	up-regulated
MCUR1	0.0234682	0.106663	3.21153	0.00201017	0.267303	-3.3117	up-regulated-regulated		THOP1	0.016124	0.575463	3.57893	0.000384908	0.0564547	-1.91174	up-regulated		AC099552.2	0.0320124	0.688726	3.68862	0.00025185	0.0133671	-2.24677	up-regulated
FAM21C	0.0177599	0.304031	3.21133	0.00201144	0.267303	-3.31229	up-regulated-regulated		MIR217HG	0.0764798	0.408261	3.57788	0.000386406	0.0564547	-1.91538	up-regulated		FAM182A	0.0293287	0.89422	3.68787	0.000252566	0.0133671	-2.24944	up-regulated
CCZ1	0.0114624	0.197153	3.2104	0.0020171	0.267303	-3.31492	up-regulated-regulated		CLEC4C	0.0278832	0.162521	3.57739	0.000387113	0.0564547	-1.91709	up-regulated		RP11-798K3.4	0.0173011	0.432362	3.68609	0.000254291	0.0134095	-2.25584	up-regulated
TPSAB1	0.0867611	0.647853	3.20918	0.00202453	0.267303	-3.31836	up-regulated-regulated		RP11-427J23.1	0.0667667	0.399596	3.57633	0.000388633	0.0564547	-1.92077	up-regulated		CSMD1	0.0431095	0.402543	3.68094	0.000259335	0.013613	-2.27432	up-regulated
RPS7	0.0164549	0.166524	3.20902	0.00202551	0.267303	-3.31882	up-regulated-regulated		GALNT8	0.06344	0.365298	3.57587	0.000389303	0.0564547	-1.92238	up-regulated		KIRREL3	0.0424409	0.483313	3.68039	0.00025988	0.013613	-2.27629	up-regulated
NRF1	0.012328	0.287539	3.20868	0.0020276	0.267303	-3.31979	up-regulated-regulated		S100A7L2	0.0803625	0.372471	3.5727	0.000393904	0.0567236	-1.93339	up-regulated		RP11-542M13.3	0.0452806	0.317543	3.6796	0.000260666	0.013613	-2.27913	up-regulated
GPR155	0.047531	0.572955	3.2035	0.00205952	0.269718	-3.33442	up-regulated-regulated		PSG9	0.0826555	0.564252	3.5719	0.000395069	0.0567236	-1.93616	up-regulated		UBAP2L	0.0315688	0.478755	3.6793	0.000260967	0.013613	-2.28021	up-regulated
RAB9B	0.0199107	0.415474	3.2027	0.00206453	0.269718	-3.33669	up-regulated-regulated		OR2Y1	0.0952483	0.562126	3.56754	0.000401502	0.057237	-1.95129	up-regulated		LINC00839	0.034282	0.351726	3.67626	0.000264002	0.0137083	-2.29109	up-regulated
CTD-2086L14.1	0.0301711	0.131154	3.20106	0.00207473	0.269835	-3.34131	up-regulated-regulated		PHKG1P1	0.0769875	0.904507	3.56587	0.00040399	0.057237	-1.95708	up-regulated		FAM197Y7	0.0429682	0.741881	3.67605	0.000264211	0.0137083	-2.29184	up-regulated
RP11-496B10.3	0.013304	0.179647	3.19033	0.00214287	0.27405	-3.37156	up-regulated-regulated		CYP4F29P	0.0952915	0.537531	3.56549	0.000404565	0.057237	-1.95841	up-regulated		ACTRT2	0.0517978	0.667807	3.67347	0.000266825	0.01377	-2.30109	up-regulated
CCDC50	0.034645	0.346662	3.19001	0.00214492	0.27405	-3.37246	up-regulated-regulated		OR52E2	0.178925	0.709354	3.56154	0.000410518	0.0575126	-1.97209	up-regulated		TLR2	0.0574209	0.545884	3.6712	0.000269129	0.0138152	-2.30918	up-regulated
SLC25A53	0.0119886	0.141631	3.18023	0.00220894	0.275213	-3.39998	up-regulated-regulated		OR4E2	0.0237767	0.303489	3.5613	0.000410881	0.0575126	-1.97292	up-regulated		AC114812.9	0.0287655	0.866378	3.66918	0.00027121	0.0138973	-2.31642	up-regulated
RP11-34F13.2	0.108049	0.217139	3.17732	0.00222831	0.275213	-3.40815	up-regulated-regulated		FGF2	0.0411722	0.501504	3.55992	0.000412986	0.0575126	-1.97771	up-regulated		FAM197Y8	0.0516882	0.745298	3.6653	0.000275242	0.014005	-2.33029	up-regulated
AL021807.1	0.0213141	0.483206	3.17133	0.00226869	0.275213	-3.42495	up-regulated-regulated		OBP2A	0.0989699	0.534911	3.55897	0.000414444	0.0575126	-1.98101	up-regulated		FRG2	0.0811324	0.631096	3.65745	0.000283563	0.0143183	-2.35828	up-regulated
AC011453.2	0.0770437	0.38596	3.17109	0.00227034	0.275213	-3.42563	up-regulated-regulated		ANP32D	0.0585821	0.604076	3.55733	0.000416965	0.0575868	-1.98669	up-regulated		SORCS1	0.0413024	0.387374	3.65508	0.00028612	0.0144069	-2.36672	up-regulated
KIAA0907	0.0222459	0.283692	3.16943	0.0022817	0.275213	-3.4303	up-regulated-regulated		SHC2	0.0193982	0.625122	3.55272	0.000424114	0.0577346	-2.00261	up-regulated		PHKG1P1	0.0417263	0.901543	3.64786	0.000294049	0.014679	-2.3924	up-regulated
GGT8P	0.0748931	0.674809	3.16814	0.00229048	0.275213	-3.43389	up-regulated-regulated		SLC6A16	0.0220453	0.675338	3.55169	0.000425735	0.0577346	-2.00618	up-regulated		LOXHD1	0.0413052	0.689864	3.64012	0.000302776	0.0149598	-2.41988	up-regulated
GVINP1	0.101651	0.365536	3.16717	0.00229718	0.275213	-3.43662	up-regulated-regulated		RP11-163O19.8	0.0912972	0.596743	3.54783	0.000431828	0.0577346	-2.01949	up-regulated		AL022476.2	0.0179548	0.890422	3.6367	0.00030671	0.0151284	-2.43201	up-regulated
NCL	0.0157018	0.394081	3.16545	0.00230907	0.275213	-3.44145	up-regulated-regulated		FAM3D	0.0205505	0.522421	3.5467	0.000433638	0.0577346	-2.0234	up-regulated		RP13-580B18.4	0.0441901	0.703799	3.63431	0.000309488	0.0152059	-2.44047	up-regulated
ITFG1	0.013073	0.321993	3.16513	0.00231125	0.275213	-3.44233	up-regulated-regulated		PROKR2	0.115085	0.512508	3.54532	0.000435856	0.0577346	-2.02818	up-regulated		RP11-24D15.1	0.0401666	0.533141	3.634	0.000309854	0.0152059	-2.44158	up-regulated
CTC-273B12.7	0.0373012	0.511183	3.16436	0.00231656	0.275213	-3.44448	up-regulated-regulated		CTD-2014E2.5	0.146535	0.601984	3.5448	0.00043669	0.0577346	-2.02997	up-regulated		ANPEP	0.047621	0.509327	3.63237	0.000311758	0.0152513	-2.44734	up-regulated
MIR371A	0.0229981	0.299896	3.16159	0.00233591	0.275213	-3.45225	up-regulated-regulated		LINC00521	0.0373015	0.333779	3.54455	0.00043708	0.0577346	-2.0308	up-regulated		AC021087.1	0.0248004	0.889167	3.63185	0.000312368	0.0152513	-2.44917	up-regulated
DYNLRB2	0.0223166	0.283838	3.16046	0.00234377	0.275213	-3.45539	up-regulated-regulated		AC079150.3	0.201065	0.785805	3.54319	0.000439278	0.0577346	-2.0355	up-regulated		FGF6	0.0556457	0.577212	3.6307	0.000313724	0.0152513	-2.45324	up-regulated
EIF4G2	0.0141077	0.242017	3.16046	0.00234381	0.275213	-3.45541	up-regulated-regulated		AP006294.2	0.0523779	0.774919	3.54238	0.000440585	0.0577346	-2.03828	up-regulated		RP11-347D21.1	0.0319711	0.282262	3.63059	0.000313855	0.0152513	-2.45363	up-regulated
RP11-123O10.4	0.068711	0.508623	3.15284	0.00239779	0.27929	-3.47669	up-regulated-regulated		AC069363.1	0.0931172	0.433504	3.54094	0.000442928	0.0577346	-2.04324	up-regulated		AC018641.7	0.0804303	0.706673	3.62794	0.000317004	0.0152911	-2.46301	up-regulated
CLK2	0.0161138	0.337248	3.13907	0.00249836	0.285776	-3.51508	up-regulated-regulated		RPL31P11	0.077065	0.501186	3.54005	0.000444385	0.0577346	-2.04632	up-regulated		RP11-1100L3.4	0.015326	0.855182	3.62725	0.000317833	0.0152911	-2.46546	up-regulated
CA15P1	0.166835	0.806568	3.13848	0.00250274	0.285776	-3.51671	up-regulated-regulated		TAS1R2	0.0594011	0.844787	3.5383	0.000447252	0.0577346	-2.05234	up-regulated		LINC01578	0.0146083	0.111178	3.62158	0.000324684	0.0154882	-2.48548	up-regulated
LINC01128	0.0223847	0.445822	3.13343	0.00254063	0.28686	-3.53075	up-regulated-regulated		ZNF80	0.109528	0.564438	3.53747	0.00044862	0.0577346	-2.0552	up-regulated		AC005822.1	0.0255104	0.645629	3.6211	0.000325276	0.01549	-2.48719	up-regulated
HNRNPUL1	0.0103577	0.283244	3.13238	0.00254863	0.28686	-3.53368	up-regulated-regulated		PEX19	0.0105998	0.109452	3.53475	0.000453141	0.0577346	-2.06458	up-regulated		IFI35	0.0170657	0.442156	3.62054	0.000325959	0.01549	-2.48916	up-regulated
RBM5	0.0212191	0.392919	3.12636	0.00259466	0.288026	-3.55039	up-regulated-regulated		CLECL1	0.0425268	0.279127	3.53437	0.000453774	0.0577346	-2.06589	up-regulated		RP11-756P10.2	0.0295539	0.458532	3.61872	0.000328199	0.0155321	-2.49559	up-regulated
RP11-12L8.1	0.0827342	0.358326	3.12553	0.00260105	0.288026	-3.55269	up-regulated-regulated		ACTBP13	0.0594306	0.808638	3.53333	0.000455509	0.0577346	-2.06946	up-regulated		PABPC1P13	0.0852775	0.81227	3.61833	0.000328678	0.0155321	-2.49696	up-regulated
MKRN1	0.0117506	0.170263	3.1245	0.00260906	0.288026	-3.55556	up-regulated-regulated		OR6F1	0.103202	0.6154	3.53254	0.000456831	0.0577346	-2.07217	up-regulated		IRF8	0.0432679	0.486931	3.61822	0.000328819	0.0155321	-2.49736	up-regulated
OLFML2B	0.0166677	0.350736	3.11955	0.00264764	0.288026	-3.56926	up-regulated-regulated		REC114	0.0738657	0.605434	3.53151	0.000458552	0.0577346	-2.07569	up-regulated		RP11-157L3.12	0.0368387	0.58173	3.60844	0.000341108	0.0158799	-2.5318	up-regulated
EIF2AK2	0.0205651	0.170368	3.11786	0.00266096	0.288026	-3.57394	up-regulated-regulated		MRGPRX3	0.0688818	0.515389	3.5306	0.000460096	0.0577346	-2.07883	up-regulated		CTD-3247H4.2	0.0274718	0.851783	3.6054	0.000345022	0.0159297	-2.5425	up-regulated
SDHC	0.0133318	0.145453	3.1144	0.0026884	0.288026	-3.58351	up-regulated-regulated		VSTM1	0.0552015	0.426972	3.53053	0.000460205	0.0577346	-2.07906	up-regulated		MFAP5	0.0596266	0.768506	3.60493	0.00034563	0.0159297	-2.54415	up-regulated
HEBP2	0.0158108	0.21005	3.11277	0.00270145	0.288026	-3.58803	up-regulated-regulated		RPH3A	0.058593	0.318228	3.53019	0.000460782	0.0577346	-2.08023	up-regulated		TNNI3K	0.082501	0.823996	3.60313	0.000347968	0.0159939	-2.55048	up-regulated
SEC24D	0.011513	0.230227	3.1127	0.00270202	0.288026	-3.58823	up-regulated-regulated		RP11-32B5.8	0.0925422	0.766326	3.52957	0.000461829	0.0577346	-2.08235	up-regulated		LINC00858	0.0161513	0.217441	3.59586	0.000357554	0.0162541	-2.57597	up-regulated
AC097662.2	0.0186793	0.194943	3.10647	0.00275235	0.288026	-3.60544	up-regulated-regulated		TAF1L	0.202204	0.622852	3.52696	0.000466284	0.0580414	-2.09133	up-regulated		GCNT7	0.0293296	0.586557	3.59232	0.000362318	0.0163936	-2.58839	up-regulated
MYLK3	0.0308495	0.461875	3.10278	0.00278255	0.288026	-3.61562	up-regulated-regulated		ZNF727	0.0683439	0.2579	3.52555	0.000468695	0.0580921	-2.09616	up-regulated		UNC93B3	0.024101	0.496401	3.58857	0.000367426	0.0165216	-2.60152	up-regulated
EMC9	0.0102822	0.0828308	3.10154	0.00279282	0.288026	-3.61905	up-regulated-regulated		RP11-296E7.1	0.0509981	0.815067	3.52306	0.000472989	0.0583749	-2.10469	up-regulated		AC127391.3	0.0930975	0.681261	3.58786	0.000368401	0.0165347	-2.604	up-regulated
TLR1	0.0338808	0.474695	3.09984	0.00280684	0.288026	-3.62372	up-regulated-regulated		AHSP	0.104174	0.36312	3.52035	0.000477716	0.0587085	-2.11399	up-regulated		PROKR2	0.0568605	0.508756	3.58753	0.000368857	0.0165347	-2.60516	up-regulated
CLEC3A	0.0489656	0.435814	3.09615	0.0028376	0.288026	-3.63388	up-regulated-regulated		AC067945.4	0.0393978	0.149402	3.51896	0.000480149	0.0587585	-2.11875	up-regulated		AICDA	0.0389539	0.466705	3.57693	0.000383715	0.0170329	-2.64219	up-regulated
CTC-339O9.1	0.0967142	0.726659	3.09465	0.00285023	0.288026	-3.63802	up-regulated-regulated		OR1G1	0.0474376	0.193617	3.51465	0.000487784	0.0588306	-2.1335	up-regulated		LRIT1	0.0357193	0.595396	3.57608	0.00038493	0.0170444	-2.64515	up-regulated
CHCHD4	0.0181609	0.174844	3.09285	0.00286544	0.288026	-3.64298	up-regulated-regulated		RP11-989E6.13	0.0865727	0.614949	3.51266	0.000491353	0.0588306	-2.14032	up-regulated		KB-1440D3.13	0.0565486	0.814928	3.57475	0.000386844	0.0170816	-2.6498	up-regulated
PHC3	0.0193292	0.197423	3.09136	0.00287802	0.288026	-3.64706	up-regulated-regulated		STOML3	0.067449	0.350058	3.51262	0.000491421	0.0588306	-2.14045	up-regulated		AC000089.3	0.033114	0.624695	3.57468	0.000386946	0.0170816	-2.65005	up-regulated
QRFP	0.0756653	0.590618	3.09062	0.00288438	0.288026	-3.64912	up-regulated-regulated		ZDHHC5	0.0123978	0.181569	3.5112	0.000493982	0.0588306	-2.14531	up-regulated		FAM19A5	0.0425999	0.560989	3.57374	0.000388301	0.0171153	-2.65332	up-regulated
ZNF718	0.0454515	0.21491	3.08887	0.00289931	0.288026	-3.65393	up-regulated-regulated		FRG2B	0.180092	0.593545	3.51029	0.00049562	0.0588306	-2.1484	up-regulated		RP11-1109M24.13	0.0631077	0.74866	3.57216	0.000390585	0.017171	-2.65882	up-regulated
KRT73	0.049695	0.717428	3.08183	0.00296012	0.288026	-3.67327	up-regulated-regulated		STK32B	0.052806	0.290786	3.50887	0.0004982	0.0588306	-2.15326	up-regulated		IFITM9P	0.0156115	0.437556	3.56907	0.000395093	0.0172314	-2.66958	up-regulated
EZH2	0.0145017	0.397732	3.07985	0.00297742	0.288026	-3.6787	up-regulated-regulated		MIR512-2	0.117894	0.833306	3.50878	0.000498361	0.0588306	-2.15356	up-regulated		PABPC1P6	0.0797359	0.595043	3.56617	0.000399372	0.0172943	-2.67967	up-regulated
DNER	0.0217379	0.301827	3.07973	0.00297845	0.288026	-3.67902	up-regulated-regulated		NAV2	0.0781021	0.442104	3.50721	0.00050123	0.0588306	-2.15893	up-regulated		MIR563	0.0403065	0.575893	3.56212	0.000405417	0.0174174	-2.69375	up-regulated
TMEM33	0.0148685	0.159917	3.07782	0.00299528	0.288026	-3.68427	up-regulated-regulated		MIR1197	0.152951	0.730216	3.50699	0.000501632	0.0588306	-2.15968	up-regulated		MLIP	0.0339845	0.63223	3.56176	0.000405965	0.0174174	-2.69501	up-regulated
LINC00708	0.0594164	0.898717	3.07671	0.00300508	0.288026	-3.68731	up-regulated-regulated		MIR518C	0.0276271	0.147658	3.50458	0.000506062	0.0588306	-2.1679	up-regulated		RP11-715L17.1	0.01932	0.918618	3.56094	0.000407196	0.0174445	-2.69785	up-regulated
MIR518A2	0.121622	0.751915	3.07483	0.00302172	0.288026	-3.69246	up-regulated-regulated		NAPG	0.0121244	0.120625	3.50383	0.000507448	0.0588306	-2.17045	up-regulated		KCNK9	0.0246866	0.410097	3.55539	0.000415662	0.0177026	-2.71713	up-regulated
BRD9	0.0206867	0.495868	3.07412	0.003028	0.288026	-3.69439	up-regulated-regulated		GVINP1	0.0936203	0.372287	3.50333	0.000508378	0.0588306	-2.17217	up-regulated		RP1-90G24.10	0.0232855	0.467805	3.55296	0.000419411	0.0178334	-2.72554	up-regulated
ABHD14A-ACY1	0.0122941	0.306835	3.07406	0.00302855	0.288026	-3.69456	up-regulated-regulated		MYOM2	0.0548975	0.553548	3.50243	0.000510051	0.0588306	-2.17524	up-regulated		RP11-760D2.1	0.0387622	0.460703	3.54784	0.000427437	0.0179927	-2.74329	up-regulated
AC004854.4	0.011275	0.0514737	3.07204	0.00304659	0.288026	-3.70009	up-regulated-regulated		KPRP	0.154915	0.67551	3.50183	0.000511165	0.0588306	-2.17728	up-regulated		RYR3	0.0521889	0.744851	3.5456	0.000430984	0.0180682	-2.75103	up-regulated
PCYOX1	0.0210037	0.150914	3.07202	0.00304679	0.288026	-3.70015	up-regulated-regulated		RP11-417E7.2	0.111719	0.813352	3.50054	0.000513585	0.0588755	-2.18169	up-regulated		MRPS31P4	0.0177924	0.172218	3.53823	0.000442868	0.0184393	-2.7765	up-regulated
PSMD6	0.0294839	0.164366	3.07135	0.00305279	0.288026	-3.70198	up-regulated-regulated		ZIM3	0.0562654	0.405498	3.49909	0.000516299	0.0589536	-2.18662	up-regulated		RPS2P6	0.0128305	0.874725	3.53582	0.000446834	0.0184609	-2.78485	up-regulated
TMA16	0.0153078	0.159616	3.0692	0.00307217	0.288026	-3.70787	up-regulated-regulated		AC092669.6	0.107784	0.819068	3.49769	0.000518948	0.0590237	-2.1914	up-regulated		ADPRHL2	0.0124093	0.443728	3.53284	0.000451767	0.0185853	-2.79513	up-regulated
DUSP14	0.0328755	0.4849	3.06876	0.00307612	0.288026	-3.70907	up-regulated-regulated		RP11-265N6.3	0.125579	0.632066	3.49618	0.000521805	0.0591168	-2.19653	up-regulated		RP11-32D4.1	0.0837683	0.852358	3.53201	0.00045315	0.0186111	-2.79799	up-regulated
MYCBPAP	0.0576737	0.354957	3.06846	0.00307886	0.288026	-3.7099	up-regulated-regulated		PDGFD	0.0794059	0.326553	3.49329	0.000527321	0.0595093	-2.20636	up-regulated		NUFIP1P	0.0479751	0.537254	3.52404	0.000466625	0.0189603	-2.82541	up-regulated
CFAP54	0.0213601	0.241166	3.06675	0.00309439	0.288026	-3.71458	up-regulated-regulated		OR6A2	0.15668	0.705701	3.4909	0.000531917	0.0597954	-2.21447	up-regulated		C2orf78	0.0431271	0.701474	3.52348	0.00046759	0.0189603	-2.82735	up-regulated
WASIR2	0.108798	0.600785	3.06534	0.00310724	0.288026	-3.71844	up-regulated-regulated		NLRP4	0.0589774	0.370733	3.48814	0.000537301	0.0601673	-2.22388	up-regulated		LINC01233	0.0414587	0.330889	3.52317	0.000468131	0.0189603	-2.82843	up-regulated
PRRC2A	0.0219502	0.518571	3.06416	0.00311798	0.288026	-3.72165	up-regulated-regulated		MIR377	0.131718	0.668902	3.48705	0.000539429	0.0601733	-2.22757	up-regulated		RP11-14K3.4	0.0432681	0.588364	3.52282	0.000468728	0.0189603	-2.82962	up-regulated
FADS6	0.0244014	0.187254	3.0641	0.0031185	0.288026	-3.72181	up-regulated-regulated		FRG2	0.160277	0.636562	3.48281	0.000547788	0.0607088	-2.24194	up-regulated		RAB3C	0.0122476	0.168167	3.52133	0.000471304	0.0189949	-2.83475	up-regulated
SRSF3	0.0293697	0.147338	3.06402	0.00311921	0.288026	-3.72202	up-regulated-regulated		PWWP2AP1	0.149651	0.556292	3.4825	0.000548416	0.0607088	-2.24301	up-regulated		ANKRD26P1	0.0266801	0.620097	3.52114	0.000471638	0.0189949	-2.83541	up-regulated
MIF-AS1	0.0444435	0.214787	3.06384	0.0031209	0.288026	-3.72252	up-regulated-regulated		OR10A5	0.117774	0.549502	3.4794	0.00055461	0.0608955	-2.2535	up-regulated		AC027612.1	0.0262355	0.252064	3.52081	0.000472203	0.0189949	-2.83653	up-regulated
HTR4	0.0301481	0.356034	3.06314	0.00312736	0.288026	-3.72445	up-regulated-regulated		MIR1283-1	0.0839441	0.293573	3.47885	0.000555716	0.0608955	-2.25536	up-regulated		AIPL1	0.025005	0.65811	3.51999	0.000473635	0.0190261	-2.83936	up-regulated
MIR520F	0.0553706	0.418482	3.06265	0.00313186	0.288026	-3.72579	up-regulated-regulated		FGF6	0.109103	0.580983	3.47851	0.000556401	0.0608955	-2.25651	up-regulated		AL121988.1	0.0189654	0.928418	3.51882	0.000475659	0.019081	-2.84335	up-regulated
BRMS1L	0.0114312	0.198107	3.06066	0.00315013	0.288026	-3.7312	up-regulated-regulated		DDI1	0.140459	0.679487	3.47614	0.000561222	0.0610852	-2.26457	up-regulated		LINC01164	0.0616758	0.615022	3.51779	0.000477466	0.019127	-2.8469	up-regulated
RP11-444A22.1	0.0854981	0.811522	3.06029	0.00315356	0.288026	-3.73221	up-regulated-regulated		MIR410	0.118473	0.78488	3.47558	0.000562347	0.0610852	-2.26644	up-regulated		GPR26	0.0305508	0.310282	3.51704	0.000478785	0.019152	-2.84948	up-regulated
RPL30	0.0106525	0.0551831	3.05769	0.00317771	0.288026	-3.73931	up-regulated-regulated		RBMY1E	0.11182	0.830622	3.47002	0.000573793	0.0615492	-2.28526	up-regulated		AC093230.2	0.0766676	0.859419	3.51668	0.000479412	0.019152	-2.85071	up-regulated
MIR520G	0.0952916	0.543748	3.05512	0.00320172	0.288026	-3.74632	up-regulated-regulated		AC092570.2	0.0837281	0.698163	3.46932	0.00057525	0.0615492	-2.28763	up-regulated		LINC01257	0.0470421	0.576807	3.51446	0.000483336	0.0192558	-2.85833	up-regulated
IL15	0.0177449	0.131141	3.05365	0.0032156	0.288026	-3.75034	up-regulated-regulated		CTNNA2	0.0451797	0.308539	3.46832	0.000577328	0.0615492	-2.29099	up-regulated		AC011513.3	0.0250901	0.321526	3.51291	0.00048609	0.0192967	-2.86365	up-regulated
CFAP70	0.011233	0.137013	3.05289	0.00322269	0.288026	-3.75239	up-regulated-regulated		RP11-125N22.4	0.0728844	0.477662	3.46734	0.000579382	0.0615492	-2.29431	up-regulated		AC007436.1	0.0765454	0.810668	3.51269	0.000486477	0.0192967	-2.86439	up-regulated
C1GALT1C1	0.015133	0.11093	3.05282	0.00322342	0.288026	-3.7526	up-regulated-regulated		AC013402.5	0.108061	0.493181	3.46655	0.000581041	0.0615492	-2.29698	up-regulated		RP11-106M3.1	0.0447245	0.74237	3.51259	0.000486661	0.0192967	-2.86475	up-regulated
TRPC4	0.0342623	0.188341	3.05251	0.00322632	0.288026	-3.75344	up-regulated-regulated		OR7A5	0.0899637	0.412524	3.46553	0.000583183	0.0615492	-2.30042	up-regulated		FAM197Y2	0.0856899	0.745378	3.51202	0.00048769	0.0192967	-2.86672	up-regulated
RP11-1008C21.1	0.045975	0.230351	3.04964	0.00325355	0.288026	-3.76126	up-regulated-regulated		KRT6C	0.0601678	0.612315	3.46463	0.000585091	0.0615492	-2.30347	up-regulated		LINC01346	0.0319988	0.386962	3.51099	0.00048953	0.0193178	-2.87024	up-regulated
MIR1225	0.0782504	0.666023	3.04829	0.0032664	0.288026	-3.76492	up-regulated-regulated		ACOX1	0.0144505	0.120698	3.46433	0.000585718	0.0615492	-2.30446	up-regulated		TTTY20	0.0409631	0.625551	3.51009	0.000491137	0.0193178	-2.87331	up-regulated
AC009052.12	0.0131731	0.26173	3.04784	0.00327076	0.288026	-3.76616	up-regulated-regulated		AC091814.3	0.0818514	0.389706	3.46081	0.000593216	0.0621121	-2.31634	up-regulated		RP11-46I8.4	0.0272167	0.486473	3.49937	0.000510787	0.0199118	-2.91	up-regulated
LYPLA1	0.0304024	0.205009	3.04535	0.00329465	0.288026	-3.77293	up-regulated-regulated		CTSV	0.0239448	0.207823	3.45704	0.000601344	0.0627366	-2.32904	up-regulated		RP4-541C22.5	0.0186367	0.478351	3.49334	0.000522171	0.0201927	-2.9306	up-regulated
MRPS25	0.0198082	0.338437	3.04274	0.00331991	0.288026	-3.78003	up-regulated-regulated		RP11-46I8.3	0.0182415	0.105039	3.45122	0.000614106	0.0638384	-2.34864	up-regulated		RP11-897M7.1	0.0441914	0.514217	3.49296	0.000522901	0.020194	-2.93191	up-regulated
F12	0.0107033	0.298157	3.04068	0.00333994	0.288026	-3.78563	up-regulated-regulated		PEG3	0.0693066	0.629442	3.44895	0.000619143	0.0641321	-2.35626	up-regulated		AC008984.2	0.0248098	0.33248	3.49208	0.000524571	0.0202231	-2.93489	up-regulated
GOLM1	0.0372408	0.176577	3.0406	0.00334071	0.288026	-3.78584	up-regulated-regulated		RP4-541C22.5	0.0388383	0.479549	3.44752	0.000622337	0.064194	-2.36107	up-regulated		CCDC168	0.0385565	0.612136	3.48551	0.000537292	0.0206027	-2.95729	up-regulated
RP11-395E19.2	0.0970367	0.387463	3.04053	0.0033414	0.288026	-3.78603	up-regulated-regulated		ZNF271P	0.0470841	0.915303	3.44523	0.000627494	0.064194	-2.36876	up-regulated		RPS6P21	0.0770356	0.639843	3.48436	0.00053955	0.0206027	-2.96121	up-regulated
TMPRSS9	0.0398464	0.599739	3.03705	0.00337555	0.288026	-3.79548	up-regulated-regulated		MIR520A	0.0782698	0.531631	3.44521	0.000627541	0.064194	-2.36883	up-regulated		RPS7P4	0.0170307	0.899694	3.48419	0.000539878	0.0206027	-2.96177	up-regulated
C3orf35	0.01236	0.210377	3.0369	0.00337701	0.288026	-3.79589	up-regulated-regulated		BMP10	0.0878991	0.68021	3.44474	0.000628594	0.064194	-2.3704	up-regulated		RP11-453N3.7	0.0990185	0.806472	3.48377	0.000540698	0.0206069	-2.96319	up-regulated
FNBP1L	0.0153499	0.260435	3.03524	0.00339336	0.288026	-3.80038	up-regulated-regulated		RP11-385M4.3	0.106533	0.688129	3.44171	0.000635493	0.064386	-2.38058	up-regulated		ACTBP2	0.0171879	0.627853	3.48309	0.000542041	0.020631	-2.96551	up-regulated
TMCO5A	0.101977	0.526571	3.0348	0.00339779	0.288026	-3.80159	up-regulated-regulated		RP11-1137G4.4	0.101209	0.403592	3.44042	0.000638444	0.064386	-2.3849	up-regulated		FAM210CP	0.0309701	0.891198	3.4792	0.000549773	0.0208705	-2.97875	up-regulated
FKBP8	0.0137286	0.256443	3.0337	0.00340868	0.288026	-3.80456	up-regulated-regulated		LINC00612	0.0605929	0.409781	3.44022	0.00063889	0.064386	-2.38555	up-regulated		RP11-495K9.8	0.0694059	0.616337	3.47879	0.000550586	0.020874	-2.98013	up-regulated
FAM3D	0.0185466	0.517817	3.03306	0.00341503	0.288026	-3.80629	up-regulated-regulated		LGMNP1	0.136935	0.671624	3.44002	0.000639354	0.064386	-2.38623	up-regulated		RP11-445O3.2	0.058529	0.547682	3.47671	0.000554777	0.0209781	-2.98721	up-regulated
RPS15A	0.126966	0.616459	3.03135	0.00343211	0.288026	-3.81093	up-regulated-regulated		H2BFWT	0.161228	0.67608	3.43833	0.000643246	0.0643977	-2.39189	up-regulated		GPR32	0.0585021	0.573075	3.47585	0.000556515	0.0210164	-2.99013	up-regulated
GJA10	0.0947129	0.576532	3.03091	0.00343657	0.288026	-3.81214	up-regulated-regulated		RP11-479A21.1	0.0309324	0.947962	3.43776	0.000644571	0.0643977	-2.39381	up-regulated		RP11-798K23.1	0.039941	0.38647	3.4693	0.000569908	0.0211824	-3.01235	up-regulated
VMO1	0.168574	0.289031	3.03075	0.00343818	0.288026	-3.81257	up-regulated-regulated		MIR526A2	0.0618071	0.315774	3.43709	0.000646131	0.0643977	-2.39607	up-regulated		C12orf54	0.0395697	0.589573	3.46906	0.000570404	0.0211824	-3.01316	up-regulated
ARF5	0.0136771	0.198973	3.03032	0.00344245	0.288026	-3.81373	up-regulated-regulated		OR7A17	0.073721	0.480685	3.43526	0.000650383	0.0644294	-2.40218	up-regulated		TSPY11P	0.0419898	0.628033	3.46763	0.00057336	0.0212649	-3.01799	up-regulated
PMM2	0.0182212	0.510302	3.02755	0.00347034	0.288026	-3.82122	up-regulated-regulated		ATP10A	0.0501332	0.539063	3.43504	0.000650892	0.0644294	-2.40291	up-regulated		KDM4D	0.0144643	0.599384	3.46677	0.000575164	0.0213046	-3.02092	up-regulated
MIR518C	0.0294859	0.145243	3.02721	0.00347377	0.288026	-3.82214	up-regulated-regulated		TCHH	0.0553988	0.371593	3.4294	0.000664182	0.0655214	-2.42176	up-regulated		RP11-368M16.5	0.0383854	0.775921	3.46601	0.000576748	0.0213105	-3.02349	up-regulated
RPS3A	0.0154474	0.295236	3.02701	0.00347586	0.288026	-3.8227	up-regulated-regulated		DCAF4L2	0.146857	0.715222	3.42349	0.000678393	0.0665921	-2.4415	up-regulated		RP11-163O19.1	0.0337663	0.479942	3.46586	0.000577065	0.0213105	-3.024	up-regulated
FAM20B	0.0195417	0.326492	3.02596	0.00348643	0.288026	-3.82552	up-regulated-regulated		CCNYL2	0.0814422	0.351579	3.42299	0.000679628	0.0665921	-2.4432	up-regulated		RP11-113C12.8	0.0499419	0.913289	3.46505	0.000578758	0.0213287	-3.02674	up-regulated
IFITM5	0.0586087	0.404007	3.02534	0.00349274	0.288026	-3.8272	up-regulated-regulated		CTD-2247C11.1	0.053352	0.228652	3.41779	0.000692388	0.0675298	-2.46053	up-regulated		AC083864.3	0.0136733	0.446784	3.46191	0.000585371	0.0214634	-3.03735	up-regulated
CPPED1	0.0162458	0.276824	3.02005	0.003547	0.288026	-3.84152	up-regulated-regulated		RP11-475J5.11	0.126803	0.796742	3.41574	0.00069748	0.0675298	-2.46736	up-regulated		CPXM2	0.034161	0.385404	3.4604	0.000588593	0.0215222	-3.04247	up-regulated
C14orf132	0.0154638	0.290657	3.01954	0.00355225	0.288026	-3.8429	up-regulated-regulated		LINC01312	0.0563746	0.413133	3.41533	0.00069849	0.0675298	-2.46871	up-regulated		RP4-725G10.4	0.0491862	0.451421	3.45702	0.000595845	0.0216558	-3.05391	up-regulated
OR2AJ1	0.119704	0.849296	3.01943	0.00355342	0.288026	-3.8432	up-regulated-regulated		NLRC4	0.0215158	0.40322	3.41456	0.00070042	0.0675298	-2.47128	up-regulated		GABRE	0.0376026	0.363236	3.45591	0.000598231	0.021661	-3.05764	up-regulated
BCAR4	0.0344007	0.200079	3.01819	0.00356626	0.288026	-3.84655	up-regulated-regulated		NLRP8	0.0590996	0.725051	3.41439	0.00070084	0.0675298	-2.47184	up-regulated		DIS3L2P1	0.0425862	0.936288	3.4535	0.000603461	0.0217786	-3.06577	up-regulated
AC105461.1	0.0429515	0.825006	3.0172	0.00357652	0.288026	-3.84922	up-regulated-regulated		FLJ16779	0.0469367	0.180018	3.4118	0.000707344	0.0679223	-2.48045	up-regulated		CTAGE12P	0.0686993	0.707917	3.45306	0.000604428	0.0217786	-3.06726	up-regulated
ASB15	0.0516936	0.595637	3.01678	0.00358089	0.288026	-3.85035	up-regulated-regulated		BCAR1P1	0.0927771	0.726126	3.41091	0.000709597	0.0679223	-2.48341	up-regulated		AC008268.2	0.049989	0.803264	3.45304	0.000604481	0.0217786	-3.06734	up-regulated
GTF3A	0.0198293	0.205544	3.0165	0.00358377	0.288026	-3.8511	up-regulated-regulated		SCRIB	0.0123964	0.58101	3.40835	0.000716115	0.0682419	-2.49193	up-regulated		KIAA1549L	0.0546131	0.574561	3.45051	0.000610029	0.0218969	-3.07587	up-regulated
GPS1	0.0219035	0.576578	3.01493	0.00360017	0.288026	-3.85534	up-regulated-regulated		OR2G2	0.118269	0.832983	3.40683	0.000719995	0.0682419	-2.49697	up-regulated		RP11-582E3.2	0.0334929	0.664665	3.44587	0.000620341	0.0221847	-3.09152	up-regulated
TTN	0.0179357	0.837947	3.01475	0.00360209	0.288026	-3.85583	up-regulated-regulated		GRIN2B	0.0923597	0.460131	3.40437	0.000726344	0.0684949	-2.50515	up-regulated		RP11-347H15.4	0.0325433	0.406637	3.44304	0.000626688	0.022384	-3.10101	up-regulated
INO80B-WBP1	0.0113177	0.129897	3.01382	0.0036118	0.288026	-3.85833	up-regulated-regulated		MCTP2	0.0228929	0.516541	3.40397	0.000727388	0.0684949	-2.50648	up-regulated		RP1L1	0.0230596	0.748031	3.4419	0.000629277	0.0223946	-3.10486	up-regulated
TRPM2	0.0431003	0.476789	3.01052	0.00364665	0.288026	-3.86725	up-regulated-regulated		SIGLEC19P	0.126642	0.720876	3.40105	0.000734994	0.0685886	-2.51617	up-regulated		AC111200.8	0.0343713	0.945548	3.43176	0.000652678	0.0229729	-3.13893	up-regulated
HNRNPDL	0.0634235	0.571451	3.00994	0.00365276	0.288026	-3.8688	up-regulated-regulated		RPS6P21	0.153552	0.644994	3.4007	0.000735894	0.0685886	-2.51731	up-regulated		MIR548I3	0.0944644	0.517454	3.43133	0.000653678	0.0229801	-3.14035	up-regulated
CTD-2291D10.4	0.0310796	0.136422	3.00838	0.00366938	0.288026	-3.87302	up-regulated-regulated		AC007238.1	0.119112	0.515813	3.39989	0.000738024	0.0685886	-2.52001	up-regulated		RP11-548K12.4	0.0661229	0.73084	3.42322	0.00067302	0.0234466	-3.16755	up-regulated
SCEL	0.0392571	0.560405	3.00817	0.0036716	0.288026	-3.87358	up-regulated-regulated		LINC01122	0.0760412	0.375314	3.39861	0.000741395	0.0685886	-2.52425	up-regulated		GRIN2B	0.0454753	0.457139	3.42253	0.000674669	0.0234622	-3.16983	up-regulated
RP11-1252I4.2	0.0217462	0.29896	3.00525	0.0037028	0.288026	-3.88143	up-regulated-regulated		DRAM2	0.0599911	0.449781	3.3974	0.000744597	0.0685886	-2.52826	up-regulated		CTD-2533K21.3	0.0594625	0.811806	3.42141	0.0006774	0.0235289	-3.1736	up-regulated
AL157871.2	0.0240681	0.528081	3.00473	0.00370842	0.288026	-3.88284	up-regulated-regulated		RP11-56M3.1	0.0717645	0.850247	3.39727	0.000744937	0.0685886	-2.52869	up-regulated		FAM153C	0.0208839	0.611518	3.41957	0.000681874	0.0236425	-3.17974	up-regulated
TRMT11	0.017329	0.171167	3.00231	0.00373452	0.288026	-3.88935	up-regulated-regulated		AP003356.1	0.147233	0.703261	3.39551	0.000749608	0.0688002	-2.53451	up-regulated		AC126755.2	0.0928615	0.71871	3.4184	0.000684747	0.0236425	-3.18366	up-regulated
RP4-630C24.3	0.0679693	0.724551	2.99824	0.00377885	0.288026	-3.9003	up-regulated-regulated		LINC01250	0.048568	0.732033	3.39339	0.00075529	0.0691031	-2.54154	up-regulated		RP11-989E6.13	0.041975	0.612225	3.41301	0.000698088	0.0240051	-3.20165	up-regulated
PRTN3	0.0420537	0.304201	2.9975	0.0037869	0.288026	-3.90228	up-regulated-regulated		RP11-740P5.3	0.0574182	0.213069	3.39181	0.000759525	0.069272	-2.54675	up-regulated		RP11-368M16.6	0.0393571	0.447053	3.41282	0.000698559	0.0240051	-3.20227	up-regulated
CTC-246B18.8	0.0100479	0.520033	2.99615	0.0038018	0.288026	-3.90592	up-regulated-regulated		MS4A8	0.0424866	0.392556	3.38925	0.000766474	0.0696591	-2.55523	up-regulated		H3F3AP3	0.0203919	0.613635	3.41	0.000705657	0.0241106	-3.2117	up-regulated
RP11-314A15.2	0.128574	0.564229	2.99271	0.00383984	0.288026	-3.91515	up-regulated-regulated		LYZL2	0.0375377	0.514495	3.38788	0.000770197	0.0696591	-2.55974	up-regulated		RP11-713C19.1	0.0293134	0.51698	3.40927	0.000707497	0.0241122	-3.21412	up-regulated
MAGOH	0.0170224	0.116731	2.99242	0.00384307	0.288026	-3.91593	up-regulated-regulated		AC011453.4	0.0802306	0.545366	3.3876	0.000770974	0.0696591	-2.56068	up-regulated		BRD7P2	0.0324095	0.630494	3.40872	0.000708885	0.0241312	-3.21595	up-regulated
AC090958.5	0.100546	0.554246	2.99224	0.00384501	0.288026	-3.9164	up-regulated-regulated		SRP14	0.010241	0.108317	3.38655	0.000773851	0.0697019	-2.56415	up-regulated		RP11-344N17.9	0.0297341	0.528359	3.40093	0.000728899	0.024723	-3.2419	up-regulated
APOA1BP	0.0174201	0.105081	2.99001	0.00386991	0.288026	-3.92239	up-regulated-regulated		MYLK4	0.0334601	0.680447	3.38358	0.000782041	0.0700834	-2.57395	up-regulated		PRELID1P4	0.0137258	0.856181	3.39795	0.000736698	0.0248447	-3.25181	up-regulated
RP11-468H14.2	0.0680955	0.904386	2.98866	0.00388501	0.288026	-3.926	up-regulated-regulated		RP11-266K4.1	0.0950777	0.810813	3.38326	0.000782919	0.0700834	-2.57499	up-regulated		RNA5SP359	0.0360271	0.578721	3.39313	0.000749464	0.0251582	-3.26782	up-regulated
TBC1D19	0.0144126	0.313525	2.98814	0.00389088	0.288026	-3.9274	up-regulated-regulated		RP11-319E16.1	0.0932991	0.404974	3.37935	0.000793846	0.0703503	-2.58789	up-regulated		RP11-348F1.3	0.0311998	0.43944	3.3912	0.000754616	0.0252435	-3.2742	up-regulated
PSORS1C1	0.0246444	0.368453	2.98701	0.00390367	0.288026	-3.93044	up-regulated-regulated		RP11-14K3.3	0.0409806	0.883841	3.37927	0.000794089	0.0703503	-2.58818	up-regulated		IRGM	0.0168229	0.187389	3.39008	0.000757645	0.0253156	-3.27793	up-regulated
OSGIN2	0.0156012	0.347124	2.98676	0.00390645	0.288026	-3.93111	up-regulated-regulated		AB015752.3	0.0390343	0.31389	3.37798	0.000797722	0.0703503	-2.59243	up-regulated		RP1-101K10.4	0.0544786	0.885613	3.38938	0.000759537	0.0253496	-3.28025	up-regulated
CTB-167G5.6	0.0597648	0.51553	2.98635	0.00391108	0.288026	-3.9322	up-regulated-regulated		MIR520F	0.0515963	0.422743	3.37752	0.000799015	0.0703503	-2.59393	up-regulated		DPF3	0.0304796	0.323327	3.38802	0.000763205	0.0254124	-3.28474	up-regulated
RP11-434H6.7	0.0509013	0.739775	2.98632	0.00391144	0.288026	-3.93229	up-regulated-regulated		ARHGAP25	0.0550705	0.542654	3.37721	0.000799878	0.0703503	-2.59494	up-regulated		PTX4	0.0196581	0.662929	3.38752	0.000764564	0.0254124	-3.2864	up-regulated
SPAM1	0.0135735	0.198223	2.98596	0.00391543	0.288026	-3.93323	up-regulated-regulated		OR10V1	0.16658	0.611649	3.37701	0.000800455	0.0703503	-2.59561	up-regulated		RP11-134G8.5	0.0109466	0.35012	3.38564	0.000769706	0.025427	-3.29264	up-regulated
CKS2	0.0194203	0.126034	2.98448	0.00393222	0.288026	-3.9372	up-regulated-regulated		ROBO2	0.0617012	0.404487	3.37594	0.000803495	0.0704041	-2.59914	up-regulated		BMP15	0.0612908	0.65241	3.38469	0.000772305	0.025427	-3.29578	up-regulated
ENTPD7	0.0143805	0.130572	2.98328	0.00394589	0.288026	-3.94042	up-regulated-regulated		RP11-347H15.2	0.0700597	0.527662	3.37387	0.000809395	0.0707075	-2.60595	up-regulated		SBF1P1	0.0688221	0.728802	3.38345	0.000775711	0.0254502	-3.29987	up-regulated
NPFFR2	0.0605536	0.249535	2.98223	0.00395784	0.288026	-3.94322	up-regulated-regulated		TXNP4	0.0966545	0.826953	3.37273	0.000812681	0.0707813	-2.60972	up-regulated		RP11-317N12.1	0.0354054	0.399831	3.3799	0.000785578	0.0256578	-3.31164	up-regulated
BANF1P2	0.0355758	0.381986	2.98037	0.00397919	0.288026	-3.94821	up-regulated-regulated		OOSP1	0.0668358	0.258233	3.37022	0.000819904	0.0709572	-2.61795	up-regulated		KRT18P16	0.0399237	0.835087	3.37757	0.000792101	0.0256987	-3.31934	up-regulated
DDX53	0.121808	0.501817	2.97803	0.00400611	0.288026	-3.95446	up-regulated-regulated		OR7E104P	0.0835987	0.360016	3.36845	0.000825057	0.0709572	-2.62378	up-regulated		AC133633.2	0.0743436	0.737539	3.37704	0.000793583	0.0256987	-3.32108	up-regulated
ADRA1B	0.0324623	0.286275	2.97794	0.00400718	0.288026	-3.95471	up-regulated-regulated		AC008753.4	0.0580921	0.831007	3.36843	0.000825103	0.0709572	-2.62383	up-regulated		GPR133	0.0388971	0.485141	3.37692	0.000793921	0.0256987	-3.32148	up-regulated
ATP5EP2	0.0240065	0.151557	2.97782	0.00400855	0.288026	-3.95502	up-regulated-regulated		AGPAT4	0.0335011	0.541645	3.3681	0.000826074	0.0709572	-2.62492	up-regulated		DND1P1	0.0133816	0.124368	3.37529	0.000798529	0.0257904	-3.32686	up-regulated
ARG2	0.0127293	0.131798	2.97492	0.00404221	0.288026	-3.96278	up-regulated-regulated		RP11-94P11.4	0.0588929	0.310723	3.36781	0.000826933	0.0709572	-2.62589	up-regulated		DRD5P1	0.0443525	0.357478	3.37075	0.000811492	0.0260063	-3.34185	up-regulated
TMPRSS11BNL	0.106997	0.579751	2.97301	0.00406459	0.288026	-3.96789	up-regulated-regulated		S100A7A	0.0893202	0.396637	3.36581	0.000832773	0.0712475	-2.63244	up-regulated		P2RX6P	0.0224478	0.719067	3.36984	0.000814105	0.0260463	-3.34485	up-regulated
TTK	0.0115954	0.115746	2.97116	0.00408621	0.288026	-3.97281	up-regulated-regulated		OR11L1	0.0889623	0.604822	3.36491	0.000835437	0.0712652	-2.63541	up-regulated		AC099344.3	0.0534291	0.786511	3.36861	0.000817645	0.0260463	-3.34888	up-regulated
PLCL1	0.0304879	0.271939	2.97052	0.00409377	0.288026	-3.97452	up-regulated-regulated		AC124997.1	0.0726021	0.404558	3.36362	0.000839235	0.0713669	-2.63963	up-regulated		RP11-495K9.3	0.0408649	0.468532	3.36832	0.000818509	0.0260463	-3.34987	up-regulated
KRT76	0.0469277	0.487781	2.96922	0.0041091	0.288026	-3.97798	up-regulated-regulated		RP11-313J2.1	0.0792601	0.268712	3.36284	0.00084155	0.0713669	-2.64219	up-regulated		RP5-1052I5.2	0.0230273	0.891178	3.36699	0.000822356	0.0260949	-3.35423	up-regulated
MCM6	0.0192006	0.178141	2.9686	0.00411646	0.288026	-3.97964	up-regulated-regulated		S100A12	0.0946699	0.330289	3.35891	0.000853292	0.072002	-2.65508	up-regulated		RP11-760D2.5	0.057593	0.397306	3.36653	0.000823704	0.0261092	-3.35575	up-regulated
SNX7	0.0476444	0.402689	2.96729	0.00413204	0.288026	-3.98314	up-regulated-regulated		MIR496	0.185632	0.721209	3.35826	0.000855244	0.072002	-2.6572	up-regulated		DCHS2	0.033214	0.357587	3.36543	0.000826901	0.0261533	-3.35936	up-regulated
ATPIF1	0.0139797	0.238627	2.96652	0.00414118	0.288026	-3.98519	up-regulated-regulated		REG3G	0.0850079	0.335831	3.35785	0.000856487	0.072002	-2.65855	up-regulated		AC007318.5	0.0308751	0.347071	3.36202	0.000836958	0.0262336	-3.37061	up-regulated
DUSP11	0.0115986	0.202122	2.9647	0.00416296	0.288085	-3.99005	up-regulated-regulated		APLP1	0.025725	0.333939	3.35679	0.000859707	0.0720638	-2.66204	up-regulated		PIEZO1P2	0.0439732	0.632144	3.36181	0.00083758	0.0262336	-3.3713	up-regulated
SYPL2	0.0295198	0.255537	2.96399	0.00417143	0.288085	-3.99193	up-regulated-regulated		SLC10A2	0.072492	0.404278	3.34997	0.000880589	0.0731417	-2.68436	up-regulated		RP11-285M22.1	0.0579908	0.669728	3.35995	0.000843086	0.0263119	-3.37739	up-regulated
ARHGAP9	0.0216546	0.344053	2.96331	0.00417963	0.288085	-3.99375	up-regulated-regulated		SSX3	0.0857154	0.363992	3.34977	0.000881202	0.0731417	-2.68501	up-regulated		CTD-2571E19.3	0.0504502	0.766868	3.35754	0.000850311	0.0264609	-3.38533	up-regulated
RNF4	0.0116903	0.304016	2.96313	0.00418176	0.288085	-3.99422	up-regulated-regulated		TBC1D3P1-DHX40P1	0.0778571	0.704494	3.34969	0.000881441	0.0731417	-2.68526	up-regulated		PFN1P2	0.0234022	0.783818	3.35399	0.000861032	0.0266935	-3.39699	up-regulated
MIR217HG	0.0806193	0.400739	2.96082	0.00420961	0.289316	-4.00037	up-regulated-regulated		DPF3	0.061409	0.325347	3.34871	0.000884482	0.0731417	-2.68846	up-regulated		RP13-580B18.1	0.0253261	0.550163	3.35382	0.000861538	0.0266935	-3.39753	up-regulated
AC006538.4	0.0103573	0.302731	2.95775	0.00424697	0.290681	-4.00855	up-regulated-regulated		CCNT1	0.0225769	0.266376	3.34849	0.000885175	0.0731417	-2.68919	up-regulated		LINC00293	0.0144612	0.176998	3.35139	0.000868957	0.0267274	-3.40551	up-regulated
TBC1D31	0.0191869	0.198604	2.95754	0.00424952	0.290681	-4.00911	up-regulated-regulated		RP11-78A18.2	0.0850886	0.738235	3.34452	0.000897616	0.0739589	-2.70216	up-regulated		SLC6A2	0.0250368	0.283534	3.35125	0.000869395	0.0267274	-3.40598	up-regulated
AC114755.3	0.0494106	0.862856	2.95639	0.00426353	0.290954	-4.01215	up-regulated-regulated		RP11-25H11.1	0.0967137	0.683392	3.34292	0.000902666	0.0740613	-2.70737	up-regulated		RP11-143E21.3	0.0414971	0.40454	3.34963	0.000874361	0.0267783	-3.41127	up-regulated
EPPK1	0.0222327	0.677447	2.95431	0.00428905	0.292008	-4.01768	up-regulated-regulated		LAIR2	0.0721703	0.580856	3.34251	0.000903965	0.0740613	-2.70871	up-regulated		TARM1	0.0222689	0.2924	3.34522	0.00088805	0.0271117	-3.42572	up-regulated
FAM214A	0.0200927	0.241966	2.94766	0.00437165	0.295845	-4.03534	up-regulated-regulated		USH2A	0.107941	0.56624	3.33922	0.00091446	0.0745153	-2.71944	up-regulated		CTD-2008N3.1	0.0890641	0.49651	3.34184	0.000898691	0.0274077	-3.43679	up-regulated
RP11-329N22.1	0.0733978	0.547189	2.94731	0.00437601	0.295845	-4.03626	up-regulated-regulated		MIR519C	0.0477582	0.403439	3.33916	0.000914645	0.0745153	-2.71963	up-regulated		FAM90A15P	0.0435853	0.829532	3.33907	0.000907479	0.0276177	-3.44584	up-regulated
MRPL28	0.0474881	0.328876	2.94637	0.00438788	0.295957	-4.03876	up-regulated-regulated		PRMT8	0.0306594	0.431843	3.33821	0.000917707	0.0745553	-2.72273	up-regulated		CTAGE10P	0.0310801	0.764721	3.33836	0.00090974	0.0276445	-3.44815	up-regulated
AC062028.1	0.0219468	0.306517	2.9437	0.0044216	0.297126	-4.04585	up-regulated-regulated		DUSP11	0.0125321	0.20469	3.33514	0.000927634	0.0750776	-2.73273	up-regulated		TSPY8	0.0763653	0.72742	3.33216	0.00092979	0.0281196	-3.46841	up-regulated
TRIB1	0.0286754	0.145145	2.94292	0.00443143	0.297126	-4.0479	up-regulated-regulated		LILRA4	0.0954762	0.443771	3.33462	0.000929313	0.0750776	-2.73441	up-regulated		FAM90A24P	0.022389	0.395789	3.33156	0.000931746	0.0281397	-3.47037	up-regulated
MS4A14	0.0499416	0.499013	2.94129	0.00445221	0.297126	-4.05223	up-regulated-regulated		C2orf78	0.0821733	0.704464	3.33374	0.000932179	0.0751	-2.73727	up-regulated		GALNT8	0.0290654	0.36351	3.33106	0.000933364	0.0281397	-3.47198	up-regulated
MIR1227	0.0132737	0.322607	2.94111	0.00445441	0.297126	-4.05269	up-regulated-regulated		RP11-347H15.6	0.0948655	0.846858	3.3325	0.000936254	0.0752193	-2.74132	up-regulated		RNMT	0.0174203	0.552158	3.32724	0.000945975	0.0284018	-3.48445	up-regulated
CACFD1	0.0151005	0.317558	2.94074	0.0044592	0.297126	-4.05368	up-regulated-regulated		NTF3	0.0711184	0.450102	3.32935	0.000946604	0.075569	-2.75154	up-regulated		FAM197Y9	0.0464615	0.565789	3.32253	0.00096171	0.0287848	-3.49978	up-regulated
TSTA3	0.0174777	0.438668	2.93521	0.00453033	0.297326	-4.06832	up-regulated-regulated		ASS1P1	0.0742998	0.856184	3.32886	0.000948246	0.075569	-2.75315	up-regulated		LINC01182	0.0183078	0.198871	3.31981	0.000970916	0.0290005	-3.50863	up-regulated
RFC5	0.0190659	0.242488	2.93483	0.00453522	0.297326	-4.06932	up-regulated-regulated		FAM205BP	0.0580739	0.854406	3.32842	0.000949715	0.075569	-2.75459	up-regulated		SSX3	0.0412878	0.361328	3.31806	0.00097688	0.0291486	-3.51431	up-regulated
RPL31P11	0.074729	0.488215	2.93382	0.00454834	0.297326	-4.07199	up-regulated-regulated		FAM210CP	0.0654082	0.893165	3.32687	0.000954851	0.075569	-2.7596	up-regulated		C22orf34	0.0421042	0.483102	3.31579	0.000984635	0.0293498	-3.52166	up-regulated
RP11-448A19.1	0.0708777	0.801085	2.93172	0.00457569	0.297326	-4.07753	up-regulated-regulated		RP11-305P22.9	0.0488701	0.390625	3.32664	0.000955635	0.075569	-2.76036	up-regulated		RP11-609L23.1	0.0422959	0.713438	3.31249	0.000996051	0.0296292	-3.53236	up-regulated
AC004447.2	0.0549144	0.844285	2.93076	0.00458817	0.297326	-4.08005	up-regulated-regulated		LINC00923	0.0683301	0.26913	3.32573	0.000958677	0.075569	-2.76331	up-regulated		CTB-178M22.1	0.0389322	0.519769	3.30641	0.00101741	0.0300795	-3.55206	up-regulated
TRAPPC4	0.0296589	0.602489	2.93072	0.00458881	0.297326	-4.08018	up-regulated-regulated		C1orf68	0.106666	0.411012	3.3252	0.000960456	0.075569	-2.76503	up-regulated		IL3	0.0203993	0.769329	3.30176	0.00103404	0.0303238	-3.56711	up-regulated
ANTXR1	0.0317006	0.426513	2.92826	0.00462112	0.297326	-4.08667	up-regulated-regulated		SPATA22	0.0820878	0.430079	3.3249	0.000961451	0.075569	-2.76599	up-regulated		RP3-437I16.1	0.0407084	0.390337	3.29858	0.00104558	0.0304774	-3.57742	up-regulated
AURKAIP1	0.0281832	0.288206	2.92803	0.0046242	0.297326	-4.08728	up-regulated-regulated		LINC00858	0.0306155	0.218565	3.32318	0.000967259	0.0757304	-2.77159	up-regulated		ZNF573	0.0120608	0.296068	3.29523	0.00105781	0.0307104	-3.58821	up-regulated
BDKRB1	0.0681772	0.624395	2.92802	0.00462433	0.297326	-4.08731	up-regulated-regulated		LINC00708	0.0642858	0.911957	3.32136	0.000973437	0.0757304	-2.7775	up-regulated		GAGE12J	0.0234992	0.252154	3.29316	0.00106544	0.030901	-3.59488	up-regulated
AC006372.5	0.0705031	0.49076	2.92731	0.0046337	0.297326	-4.08918	up-regulated-regulated		PSG8	0.0853116	0.484606	3.32135	0.000973467	0.0757304	-2.77753	up-regulated		CST13P	0.0692071	0.707626	3.28989	0.00107762	0.0311298	-3.60543	up-regulated
NDN	0.0628105	0.472398	2.92638	0.00464591	0.297378	-4.09161	up-regulated-regulated		RP5-1180C18.1	0.0595107	0.257413	3.32121	0.000973949	0.0757304	-2.77799	up-regulated		ASS1P1	0.0358984	0.853862	3.2883	0.00108361	0.0312285	-3.61056	up-regulated
ARL13B	0.0155998	0.235142	2.9257	0.00465502	0.297378	-4.09343	up-regulated-regulated		GUCY1A2	0.0389453	0.261018	3.31965	0.000979263	0.07594	-2.78304	up-regulated		AQP7P4	0.0440931	0.760408	3.28812	0.00108427	0.0312285	-3.61113	up-regulated
PRIMA1	0.0756907	0.451633	2.92403	0.00467715	0.297847	-4.09781	up-regulated-regulated		REXO1L1P	0.126411	0.735125	3.31872	0.000982436	0.0759829	-2.78605	up-regulated		ZNF679	0.0237796	0.272028	3.28749	0.00108666	0.0312476	-3.61318	up-regulated
H3F3B	0.0133913	0.103781	2.92148	0.00471137	0.297847	-4.10455	up-regulated-regulated		CTD-2506J14.1	0.118879	0.391826	3.31648	0.000990137	0.0760996	-2.7933	up-regulated		RP11-540N6.1	0.0521693	0.418088	3.28697	0.00108862	0.0312593	-3.61485	up-regulated
RPL7AL2	0.0374918	0.222017	2.92086	0.00471964	0.297847	-4.10617	up-regulated-regulated		CTB-47B8.5	0.0134821	0.633007	3.3153	0.000994222	0.0760996	-2.79712	up-regulated		IGHV2OR16-5	0.0486293	0.79766	3.2867	0.00108965	0.0312593	-3.61572	up-regulated
TSC22D1	0.0216721	0.226423	2.92024	0.00472804	0.297847	-4.10781	up-regulated-regulated		KCNQ2	0.0715519	0.501094	3.31524	0.00099444	0.0760996	-2.79732	up-regulated		RP11-163O19.8	0.042394	0.5941	3.28518	0.00109539	0.0313618	-3.62059	up-regulated
PRPF38AP1	0.0602439	0.557361	2.91952	0.00473769	0.297847	-4.1097	up-regulated-regulated		CTC-484M2.1	0.224521	0.770786	3.31227	0.00100477	0.0765094	-2.80691	up-regulated		CLVS1	0.0215038	0.299344	3.28113	0.00111088	0.0316946	-3.63362	up-regulated
NAE1	0.013003	0.292025	2.91654	0.00477807	0.297847	-4.11754	up-regulated-regulated		NCOA3	0.010357	0.170487	3.31219	0.00100507	0.0765094	-2.80719	up-regulated		E2F3P1	0.0698967	0.32909	3.281	0.00111138	0.0316946	-3.63404	up-regulated
RP11-1103G16.1	0.031698	0.201597	2.91608	0.00478433	0.297847	-4.11875	up-regulated-regulated		PPP6R2P1	0.0889818	0.687754	3.30741	0.00102194	0.0774774	-2.82264	up-regulated		FTHL17	0.0209053	0.660475	3.27751	0.0011249	0.0319543	-3.64525	up-regulated
AC007395.3	0.0934924	0.703128	2.91447	0.00480631	0.297847	-4.12298	up-regulated-regulated		MBD3L1	0.0655461	0.294585	3.30707	0.00102313	0.0774774	-2.82373	up-regulated		MIR3132	0.0250575	0.831282	3.27695	0.00112709	0.0319854	-3.64706	up-regulated
CCDC85A	0.127973	0.490184	2.91419	0.00481023	0.297847	-4.12374	up-regulated-regulated		MIR379	0.11864	0.645794	3.3059	0.00102731	0.0775916	-2.82751	up-regulated		AL645922.1	0.0516773	0.514504	3.27132	0.00114927	0.0324875	-3.66512	up-regulated
MIR6859-1	0.026461	0.910719	2.91387	0.00481461	0.297847	-4.12458	up-regulated-regulated		PRG2	0.099661	0.550279	3.30442	0.00103261	0.0777374	-2.83229	up-regulated		ST8SIA5	0.0166837	0.660189	3.2686	0.0011601	0.0326398	-3.67382	up-regulated
RP11-525A16.4	0.0457027	0.34203	2.91328	0.00482264	0.297847	-4.12612	up-regulated-regulated		ZFP57	0.0625289	0.53892	3.30386	0.0010346	0.0777374	-2.83408	up-regulated		RNA5SP377	0.0675116	0.482337	3.26809	0.00116214	0.0326398	-3.67544	up-regulated
KMT2B	0.0125588	0.643104	2.91077	0.00485725	0.297847	-4.13272	up-regulated-regulated		GNG2	0.084256	0.488894	3.30105	0.00104478	0.0781393	-2.84316	up-regulated		CERS5	0.0143505	0.191965	3.26739	0.00116497	0.0326398	-3.6777	up-regulated
CCDC42	0.022976	0.471776	2.91036	0.00486292	0.297847	-4.1338	up-regulated-regulated		RP4-576H24.4	0.130099	0.520565	3.30089	0.00104534	0.0781393	-2.84366	up-regulated		DPP6	0.0407243	0.472797	3.26715	0.00116591	0.0326398	-3.67845	up-regulated
RP11-439A17.10	0.0131624	0.0684404	2.90832	0.00489115	0.297847	-4.13915	up-regulated-regulated		OTOS	0.0393805	0.343967	3.29948	0.00105048	0.0783213	-2.8482	up-regulated		PIEZO2	0.0367322	0.425075	3.26618	0.00116983	0.0326864	-3.68156	up-regulated
RP11-83N9.5	0.0977195	0.270452	2.90623	0.00492025	0.297847	-4.14462	up-regulated-regulated		RP11-548K12.10	0.0495531	0.165099	3.29796	0.00105604	0.0784828	-2.8531	up-regulated		MIR6825	0.0128639	0.0653034	3.26579	0.00117142	0.0326994	-3.68282	up-regulated
SMPD1	0.0117961	0.214783	2.90376	0.00495485	0.297847	-4.15109	up-regulated-regulated		HHLA1	0.0964363	0.431639	3.29728	0.00105853	0.0784828	-2.85529	up-regulated		RP11-738O11.13	0.0390114	0.5405	3.26455	0.00117643	0.0327134	-3.68678	up-regulated
UTP11L	0.0108052	0.227483	2.90126	0.00499026	0.297847	-4.15767	up-regulated-regulated		CCL4L1	0.0688535	0.352605	3.29554	0.00106496	0.0784828	-2.86091	up-regulated		HNRNPFP1	0.0138086	0.869622	3.25969	0.00119632	0.0330286	-3.70231	up-regulated
TMEM209	0.01536	0.115093	2.89867	0.00502702	0.297847	-4.16444	up-regulated-regulated		ADAMTS10	0.050163	0.564026	3.29496	0.00106708	0.0784828	-2.86275	up-regulated		IKZF1	0.0398979	0.461216	3.25956	0.00119688	0.0330286	-3.70275	up-regulated
up-regulated-regulatedF2	0.0133611	0.159438	2.89792	0.00503766	0.297847	-4.1664	up-regulated-regulated		AP001596.6	0.178665	0.753828	3.29313	0.0010739	0.0784828	-2.86867	up-regulated		NPIPA5	0.0252294	0.661678	3.25755	0.00120516	0.0332256	-3.70914	up-regulated
LINC01497	0.0918552	0.817069	2.89628	0.00506123	0.297847	-4.17071	up-regulated-regulated		TAAR3	0.119436	0.621186	3.29301	0.00107433	0.0784828	-2.86904	up-regulated		RP11-440J4.2	0.038538	0.863243	3.25582	0.00121237	0.0332927	-3.71466	up-regulated
CCP110	0.0109474	0.129024	2.89612	0.00506349	0.297847	-4.17112	up-regulated-regulated		BTNL9	0.0579987	0.322085	3.29292	0.00107468	0.0784828	-2.86934	up-regulated		OTOP1	0.0277685	0.410999	3.25074	0.00123378	0.0336942	-3.73088	up-regulated
ANGEL2	0.0168612	0.239659	2.89589	0.00506675	0.297847	-4.17171	up-regulated-regulated		SEZ6L	0.0477673	0.276249	3.2922	0.00107735	0.0784828	-2.87164	up-regulated		ANKRD20A11P	0.019103	0.249447	3.24847	0.00124343	0.0338622	-3.7381	up-regulated
NOL7	0.0131209	0.138048	2.89572	0.0050692	0.297847	-4.17216	up-regulated-regulated		PRR20A	0.0812452	0.37967	3.29205	0.00107792	0.0784828	-2.87213	up-regulated		MIR4458	0.0498989	0.886787	3.24807	0.00124514	0.0338769	-3.73937	up-regulated
SPC25	0.0291773	0.1951	2.89557	0.00507133	0.297847	-4.17254	up-regulated-regulated		OBP2B	0.0933305	0.517488	3.29101	0.0010818	0.0784828	-2.87546	up-regulated		RP11-715C4.1	0.0706784	0.833305	3.24778	0.00124638	0.0338789	-3.74029	up-regulated
WBSCR17	0.0311876	0.36914	2.89388	0.0050957	0.297847	-4.17697	up-regulated-regulated		CTD-2007A10.1	0.180487	0.59053	3.29068	0.00108305	0.0784828	-2.87653	up-regulated		MXRA5Y	0.0564706	0.5784	3.24508	0.00125799	0.0340645	-3.74888	up-regulated
CCNI	0.012364	0.119427	2.89339	0.0051028	0.297847	-4.17825	up-regulated-regulated		AJAP1	0.0642052	0.499634	3.29013	0.00108511	0.0784828	-2.8783	up-regulated		IGHV3OR16-12	0.0340299	0.307626	3.24483	0.00125908	0.0340645	-3.74968	up-regulated
TRDN	0.135209	0.663698	2.89306	0.00510755	0.297847	-4.17911	up-regulated-regulated		RBMY1A3P	0.0548697	0.416303	3.28884	0.00108996	0.078637	-2.88243	up-regulated		ABCD1P3	0.0286649	0.413601	3.24294	0.00126727	0.0342541	-3.75568	up-regulated
ACTR5	0.0110989	0.0929355	2.89288	0.00511015	0.297847	-4.17958	up-regulated-regulated		FTH1P14	0.129952	0.797818	3.28528	0.00110348	0.0788557	-2.89386	up-regulated		GPR112	0.0175295	0.602273	3.24089	0.0012762	0.0343994	-3.76219	up-regulated
C1orf123	0.0186937	0.299343	2.88994	0.00515283	0.297847	-4.18726	up-regulated-regulated		RP4-760C5.3	0.0429266	0.545565	3.2841	0.001108	0.0788557	-2.89765	up-regulated		HSPA1L	0.0105596	0.63653	3.23962	0.00128178	0.0345175	-3.76622	up-regulated
PTPRO	0.0448735	0.271113	2.88981	0.00515486	0.297847	-4.18762	up-regulated-regulated		PABPC1P13	0.155414	0.818383	3.28367	0.00110966	0.0788557	-2.89905	up-regulated		RP11-805I24.1	0.0618857	0.596788	3.23772	0.00129014	0.0346463	-3.77225	up-regulated
TRIM55	0.0631435	0.529155	2.8891	0.00516523	0.297847	-4.18947	up-regulated-regulated		ASB2	0.0508712	0.510776	3.2832	0.00111144	0.0788557	-2.90053	up-regulated		MYO3A	0.0390856	0.375539	3.23585	0.00129847	0.0347761	-3.7782	up-regulated
TPBGL	0.0993393	0.765315	2.88776	0.00518481	0.297847	-4.19296	up-regulated-regulated		AL132709.5	0.117776	0.57666	3.28242	0.00111448	0.0788557	-2.90306	up-regulated		OR7A10	0.0353661	0.417046	3.2349	0.00130271	0.0347761	-3.78122	up-regulated
FAAHP1	0.0309828	0.453029	2.88748	0.00518885	0.297847	-4.19368	up-regulated-regulated		PCIF1	0.0121577	0.259624	3.28225	0.00111513	0.0788557	-2.9036	up-regulated		CTBP2P6	0.0321139	0.762688	3.23447	0.0013046	0.0347761	-3.78256	up-regulated
RCBTB1	0.0122182	0.226193	2.88711	0.00519436	0.297847	-4.19466	up-regulated-regulated		FRMD8P1	0.0535099	0.483136	3.28199	0.00111612	0.0788557	-2.90443	up-regulated		MAN1A2P1	0.0280342	0.190011	3.23433	0.00130523	0.0347761	-3.78301	up-regulated
RP11-326C3.4	0.0662982	0.800643	2.88704	0.00519539	0.297847	-4.19484	up-regulated-regulated		GPR114	0.0365243	0.262625	3.28178	0.00111693	0.0788557	-2.9051	up-regulated		REXO1L8P	0.0433636	0.789953	3.23413	0.00130613	0.0347761	-3.78365	up-regulated
PLAGL2	0.01395	0.152242	2.8869	0.00519736	0.297847	-4.19519	up-regulated-regulated		RP13-580B18.4	0.0794674	0.706996	3.28138	0.00111848	0.0788557	-2.90639	up-regulated		RP11-481A20.8	0.0241525	0.884422	3.23397	0.00130683	0.0347761	-3.78414	up-regulated
MIR526A2	0.0618401	0.306951	2.88613	0.00520874	0.297847	-4.19721	up-regulated-regulated		RP11-523L20.2	0.0677432	0.628311	3.28094	0.00112018	0.0788557	-2.90779	up-regulated		DCAF4L2	0.0687026	0.710908	3.23266	0.00131272	0.0348972	-3.78831	up-regulated
AL133493.2	0.0667261	0.522786	2.88604	0.00521015	0.297847	-4.19746	up-regulated-regulated		CHST15	0.0525866	0.562455	3.27844	0.00112991	0.0791775	-2.91581	up-regulated		KCNB2	0.0420544	0.410094	3.23222	0.00131468	0.0349173	-3.78969	up-regulated
TMEM74	0.0669709	0.508632	2.88538	0.00521979	0.297847	-4.19917	up-regulated-regulated		AC027612.4	0.0877969	0.438845	3.27836	0.00113021	0.0791775	-2.91606	up-regulated		RP11-65D24.1	0.0433299	0.613601	3.23042	0.0013228	0.0350687	-3.79539	up-regulated
AXDND1	0.0177725	0.281015	2.88391	0.00524157	0.297847	-4.20301	up-regulated-regulated		COL20A1	0.0554769	0.478979	3.27708	0.00113522	0.0793368	-2.92016	up-regulated		AC027612.4	0.0417584	0.436182	3.22986	0.00132535	0.0351043	-3.79717	up-regulated
HTRA2	0.0223375	0.920574	2.8823	0.00526543	0.297847	-4.2072	up-regulated-regulated		H2BFM	0.110004	0.532602	3.2725	0.0011533	0.0798238	-2.9348	up-regulated		SSX2	0.025489	0.406144	3.22359	0.00135407	0.0355302	-3.81701	up-regulated
MIR519E	0.0666431	0.392262	2.88223	0.00526656	0.297847	-4.20739	up-regulated-regulated		RBFOX3	0.0510795	0.448059	3.27171	0.00115646	0.0798238	-2.93734	up-regulated		RP11-125N22.4	0.0340851	0.475523	3.22314	0.00135613	0.0355302	-3.81842	up-regulated
TMEM106C	0.0668252	0.735145	2.88156	0.00527646	0.297847	-4.20913	up-regulated-regulated		KIRREL3	0.0763403	0.486384	3.27054	0.00116111	0.0798238	-2.94106	up-regulated		RP11-1396O13.22	0.0453038	0.864076	3.22032	0.00136927	0.0358421	-3.82734	up-regulated
APIP	0.0146384	0.0809684	2.88131	0.00528029	0.297847	-4.2098	up-regulated-regulated		MIR892A	0.165476	0.624424	3.26989	0.00116371	0.0798238	-2.94313	up-regulated		AP3B2	0.0117638	0.292456	3.21999	0.00137082	0.0358502	-3.82838	up-regulated
RBM39	0.0223313	0.17142	2.87923	0.00531128	0.297847	-4.21519	up-regulated-regulated		KCNA1	0.0625913	0.30654	3.26897	0.00116741	0.0798238	-2.94607	up-regulated		ANP32BP1	0.0222449	0.546984	3.21949	0.00137314	0.0358578	-3.82995	up-regulated
AHSA1	0.0271573	0.557482	2.87922	0.00531152	0.297847	-4.21523	up-regulated-regulated		CCP110	0.011351	0.130984	3.26831	0.00117009	0.0798238	-2.9482	up-regulated		PZP	0.0537683	0.455277	3.21674	0.00138609	0.0360545	-3.83863	up-regulated
PRDM4	0.012579	0.213647	2.87739	0.00533895	0.297847	-4.21998	up-regulated-regulated		SLAMF6	0.0899613	0.261858	3.26693	0.00117565	0.0798238	-2.95259	up-regulated		SAPCD2P4	0.0302034	0.591576	3.21523	0.00139324	0.0361431	-3.84338	up-regulated
MIR1283-1	0.0798421	0.278154	2.87632	0.0053552	0.297847	-4.22279	up-regulated-regulated		MXRA5	0.0864597	0.390395	3.26604	0.00117926	0.0798238	-2.95543	up-regulated		AC010970.2	0.0280661	0.33861	3.21265	0.00140552	0.0362753	-3.8515	up-regulated
AC104794.4	0.128287	0.444361	2.87549	0.00536773	0.297847	-4.22494	up-regulated-regulated		OR2AT4	0.0682223	0.328854	3.26577	0.00118035	0.0798238	-2.95629	up-regulated		CCL13	0.044898	0.42467	3.20859	0.00142511	0.0366272	-3.8643	up-regulated
RP11-109J4.1	0.0407859	0.338468	2.87501	0.00537497	0.297847	-4.22618	up-regulated-regulated		EMR3	0.0517694	0.216761	3.26547	0.00118157	0.0798238	-2.95725	up-regulated		TMEFF2	0.0345503	0.328128	3.208	0.00142797	0.0366272	-3.86616	up-regulated
PTGR1	0.016379	0.131578	2.87343	0.00539906	0.297847	-4.2303	up-regulated-regulated		CYP2C19	0.133416	0.570621	3.26498	0.00118358	0.0798238	-2.95882	up-regulated		RP11-195E2.1	0.021718	0.882913	3.20581	0.00143864	0.0366582	-3.87304	up-regulated
CCL23	0.0710833	0.494286	2.87293	0.00540668	0.297847	-4.2316	up-regulated-regulated		KRT8P48	0.0847443	0.86558	3.26464	0.00118496	0.0798238	-2.9599	up-regulated		ENPP7P13	0.0346109	0.938234	3.20561	0.00143963	0.0366582	-3.87368	up-regulated
GNL3	0.028481	0.283187	2.87238	0.00541504	0.297847	-4.23303	up-regulated-regulated		RP11-404P21.8	0.0691082	0.55295	3.26374	0.00118866	0.0798238	-2.96279	up-regulated		RP11-690C23.2	0.024366	0.769931	3.2038	0.00144853	0.0368523	-3.87937	up-regulated
AC067956.1	0.0615672	0.877301	2.8714	0.00542992	0.297847	-4.23556	up-regulated-regulated		SUCLA2P1	0.149148	0.722235	3.26335	0.00119022	0.0798238	-2.96401	up-regulated		RP11-168K9.2	0.0615239	0.612701	3.20164	0.00145919	0.0370215	-3.88615	up-regulated
C4orf33	0.0127654	0.167345	2.87133	0.00543102	0.297847	-4.23575	up-regulated-regulated		TRUB1	0.0156873	0.0788667	3.26333	0.00119032	0.0798238	-2.96408	up-regulated		AC007349.4	0.0764811	0.825995	3.20142	0.00146028	0.0370215	-3.88685	up-regulated
CFL1P1	0.0214	0.940569	2.86988	0.00545324	0.297847	-4.23951	up-regulated-regulated		RP11-256I9.2	0.110226	0.609007	3.26239	0.00119417	0.0798238	-2.96708	up-regulated		RP11-23J9.3	0.0143294	0.412341	3.20076	0.00146355	0.0370559	-3.88891	up-regulated
GUCY1A2	0.0405412	0.256764	2.8694	0.00546068	0.297847	-4.24076	up-regulated-regulated		ZNF883	0.068451	0.275243	3.26232	0.00119448	0.0798238	-2.96731	up-regulated		CTD-2050N2.1	0.0614484	0.8016	3.20063	0.00146419	0.0370559	-3.88932	up-regulated
SLC6A3	0.0428007	0.503138	2.86914	0.00546472	0.297847	-4.24145	up-regulated-regulated		CTD-3098H1.2	0.0539979	0.885171	3.26086	0.00120047	0.0799301	-2.97195	up-regulated		RP11-344N17.6	0.0279726	0.415462	3.19418	0.00149659	0.0376138	-3.90954	up-regulated
GAP43	0.0556853	0.427752	2.86807	0.0054812	0.297847	-4.24422	up-regulated-regulated		KIAA1549L	0.106226	0.578287	3.26059	0.00120158	0.0799301	-2.97281	up-regulated		RP11-548K12.10	0.0231721	0.163645	3.19172	0.00150909	0.0377637	-3.91723	up-regulated
NDUFS6	0.0120375	0.640581	2.86783	0.00548485	0.297847	-4.24484	up-regulated-regulated		OR10H2	0.0731801	0.527329	3.25803	0.0012122	0.0802905	-2.98096	up-regulated		HMGN2P41	0.0698196	0.778357	3.18854	0.00152541	0.0380528	-3.92717	up-regulated
SSR4	0.0686533	0.730943	2.8667	0.00550233	0.297847	-4.24777	up-regulated-regulated		RP11-103H7.1	0.0993045	0.85097	3.25795	0.00121254	0.0802905	-2.98121	up-regulated		FCF1	0.0327527	0.772506	3.18836	0.00152639	0.0380528	-3.92776	up-regulated
LINC00624	0.0232791	0.047633	2.86619	0.00551033	0.297847	-4.24911	up-regulated-regulated		AICDA	0.0720276	0.469468	3.25652	0.00121854	0.0804232	-2.98579	up-regulated		NRG1	0.0291027	0.341501	3.18547	0.00154135	0.0382737	-3.93677	up-regulated
KRT6A	0.0842336	0.682765	2.86597	0.00551365	0.297847	-4.24966	up-regulated-regulated		KCNQ3	0.0646056	0.314703	3.25615	0.00122009	0.0804232	-2.98696	up-regulated		CTD-2031P19.5	0.0330812	0.614029	3.18419	0.00154804	0.0383935	-3.94077	up-regulated
CLUHP3	0.01745	0.326078	2.8659	0.00551474	0.297847	-4.24984	up-regulated-regulated		CTB-91J4.1	0.0538672	0.583463	3.25064	0.00124336	0.0817643	-3.00447	up-regulated		LYPD4	0.02774	0.437288	3.18239	0.0015575	0.0385121	-3.9464	up-regulated
CHRNB2	0.0402725	0.438987	2.86344	0.00555307	0.298787	-4.25623	up-regulated-regulated		AC092669.3	0.163626	0.760955	3.25001	0.00124607	0.0817643	-3.00648	up-regulated		AC004899.3	0.0634117	0.583279	3.18237	0.00155759	0.0385121	-3.94645	up-regulated
LRRC31	0.0309373	0.209226	2.86176	0.00557945	0.298787	-4.26059	up-regulated-regulated		IL17A	0.106986	0.76983	3.24827	0.00125352	0.0820676	-3.012	up-regulated		RP3-475N16.1	0.0125771	0.0838634	3.17967	0.00157187	0.0387521	-3.95488	up-regulated
AC008982.2	0.0950489	0.710531	2.8615	0.00558354	0.298787	-4.26127	up-regulated-regulated		AC007436.1	0.141749	0.816092	3.24729	0.00125776	0.0821111	-3.01512	up-regulated		RP11-700P18.1	0.0282854	0.409755	3.17953	0.00157264	0.0387521	-3.95533	up-regulated
OR2AG2	0.177488	0.691032	2.85948	0.00561534	0.298787	-4.2665	up-regulated-regulated		CTD-2291D10.4	0.0338693	0.143584	3.24609	0.00126292	0.0821111	-3.01892	up-regulated		RNU4-63P	0.0390018	0.785843	3.17897	0.00157558	0.0387917	-3.95706	up-regulated
EFHB	0.0246725	0.236073	2.85789	0.00564043	0.298787	-4.2706	up-regulated-regulated		MARCO	0.130506	0.519209	3.24493	0.00126794	0.0821111	-3.02259	up-regulated		LINC00354	0.0449874	0.371046	3.17817	0.00157985	0.0388079	-3.95956	up-regulated
RP11-732A19.2	0.0470042	0.249312	2.85784	0.00564129	0.298787	-4.27074	up-regulated-regulated		RP11-411B10.5	0.0501915	0.649523	3.24489	0.00126814	0.0821111	-3.02273	up-regulated		RP11-826N14.4	0.0614903	0.737916	3.17444	0.00159985	0.0391115	-3.97118	up-regulated
PTHLH	0.0351634	0.295964	2.85645	0.00566337	0.298787	-4.27434	up-regulated-regulated		CTC-360J11.4	0.123269	0.876979	3.24419	0.00127117	0.0821111	-3.02495	up-regulated		IFITM3	0.0161646	0.231906	3.17428	0.00160071	0.0391115	-3.97167	up-regulated
PRSS35	0.0395956	0.539098	2.85637	0.00566458	0.298787	-4.27454	up-regulated-regulated		CLEC17A	0.0360603	0.172187	3.24307	0.00127605	0.0821612	-3.02849	up-regulated		AC004692.5	0.0316427	0.931672	3.17351	0.0016049	0.039148	-3.97409	up-regulated
UBL4A	0.0171037	0.246162	2.85553	0.00567797	0.298787	-4.27671	up-regulated-regulated		IRF8	0.0764204	0.490102	3.24242	0.00127888	0.0821612	-3.03054	up-regulated		FLI1	0.0305417	0.399319	3.17209	0.00161259	0.0392474	-3.9785	up-regulated
DLGAP1	0.0221248	0.390656	2.85479	0.00568988	0.298787	-4.27864	up-regulated-regulated		NAGPA	0.0125711	0.694544	3.24206	0.00128045	0.0821612	-3.03168	up-regulated		RP11-281H11.1	0.0798026	0.773295	3.17057	0.00162087	0.039372	-3.98323	up-regulated
HLA-DMB	0.0291655	0.466179	2.85394	0.00570341	0.298787	-4.28083	up-regulated-regulated		CPPED1	0.0159056	0.278819	3.23897	0.00129406	0.0828513	-3.04147	up-regulated		CYP21A2	0.0174388	0.553017	3.1682	0.00163386	0.039555	-3.9906	up-regulated
APOBEC4	0.0388108	0.480335	2.85281	0.00572155	0.298787	-4.28375	up-regulated-regulated		MGAT3	0.0419085	0.538278	3.23794	0.00129865	0.0828631	-3.04474	up-regulated		LHCGR	0.0452353	0.445327	3.16785	0.00163579	0.0395569	-3.99168	up-regulated
FGD5-AS1	0.0133767	0.102987	2.85226	0.00573046	0.298787	-4.28519	up-regulated-regulated		CCDC85A	0.129985	0.510464	3.23764	0.00129996	0.0828631	-3.04567	up-regulated		FTLP17	0.0617802	0.793377	3.16769	0.00163667	0.0395569	-3.99218	up-regulated
TMPRSS11B	0.0502113	0.550617	2.85145	0.00574348	0.298787	-4.28728	up-regulated-regulated		RP11-1084I9.1	0.0527863	0.471874	3.23582	0.0013081	0.0831991	-3.05145	up-regulated		RP11-98L5.4	0.0613138	0.601317	3.16341	0.00166043	0.0397846	-4.00548	up-regulated
MEDAG	0.071928	0.488906	2.8502	0.00576364	0.298787	-4.2905	up-regulated-regulated		PFN1P3	0.0987871	0.790349	3.23212	0.00132473	0.0840666	-3.06314	up-regulated		RGS6	0.036259	0.370454	3.16318	0.00166168	0.0397846	-4.00618	up-regulated
DICER1	0.0109911	0.34127	2.84957	0.00577388	0.298787	-4.29214	up-regulated-regulated		ASPRV1	0.0213001	0.908642	3.2315	0.00132754	0.0840666	-3.0651	up-regulated		AC018685.2	0.0727735	0.647802	3.16307	0.0016623	0.0397846	-4.00652	up-regulated
SNRPD2P1	0.0695438	0.857498	2.84819	0.00579624	0.298787	-4.29569	up-regulated-regulated		AARS2	0.0146128	0.201683	3.22907	0.00133858	0.0842131	-3.07277	up-regulated		AC108004.1	0.0189473	0.93615	3.16286	0.00166347	0.0397846	-4.00717	up-regulated
MCU	0.0122113	0.27348	2.84796	0.00579999	0.298787	-4.29629	up-regulated-regulated		AC011453.2	0.0702472	0.390388	3.22759	0.00134536	0.0842131	-3.07744	up-regulated		FAM47A	0.0559195	0.763821	3.1623	0.0016666	0.0397846	-4.0089	up-regulated
ARFIP2	0.0217786	0.221706	2.84673	0.0058201	0.299291	-4.29948	up-regulated-regulated		HTR2A	0.0556388	0.341246	3.22687	0.00134866	0.0842131	-3.07971	up-regulated		PSG10P	0.0257109	0.376419	3.16205	0.00166804	0.0397846	-4.0097	up-regulated
CTC-441N14.2	0.0635095	0.479004	2.84544	0.00584107	0.299309	-4.30279	up-regulated-regulated		AF067845.1	0.0289139	0.365567	3.22678	0.0013491	0.0842131	-3.08001	up-regulated		CTAGE16P	0.0670071	0.832564	3.16052	0.0016766	0.0397974	-4.01442	up-regulated
RP11-451H23.3	0.0428947	0.615018	2.84365	0.00587046	0.300284	-4.3074	up-regulated-regulated		MIR1305	0.0953167	0.874997	3.22647	0.00135053	0.0842131	-3.08099	up-regulated		RP11-312J18.5	0.02882	0.769951	3.16049	0.00167681	0.0397974	-4.01454	up-regulated
PTBP1	0.0179081	0.329502	2.84174	0.00590206	0.300583	-4.31234	up-regulated-regulated		RP11-798K23.1	0.0736557	0.389309	3.22646	0.00135055	0.0842131	-3.081	up-regulated		NBPF4	0.0501391	0.628948	3.15957	0.00168198	0.0398874	-4.01738	up-regulated
TAF13	0.0111985	0.11473	2.84076	0.00591823	0.300583	-4.31486	up-regulated-regulated		HEMGN	0.0793785	0.446624	3.2262	0.00135178	0.0842131	-3.08184	up-regulated		RP11-669N7.2	0.0465269	0.535529	3.15839	0.00168867	0.0399439	-4.02104	up-regulated
GC	0.034043	0.391611	2.84026	0.00592655	0.300583	-4.31615	up-regulated-regulated		MIR487A	0.138205	0.740621	3.22586	0.00135335	0.0842131	-3.08292	up-regulated		IGLV8OR8-1	0.0700154	0.66099	3.15406	0.00171339	0.0402573	-4.03445	up-regulated
HNRNPLP2	0.0706753	0.578979	2.83701	0.0059807	0.300583	-4.32452	up-regulated-regulated		ZIM2	0.0715935	0.433828	3.22476	0.0013584	0.0842131	-3.08636	up-regulated		PUSL1	0.0191169	0.887809	3.15148	0.00172829	0.040542	-4.04244	up-regulated
MRPL37	0.0266644	0.402253	2.83494	0.0060154	0.300583	-4.32985	up-regulated-regulated		DMBT1	0.0555661	0.45209	3.22391	0.00136236	0.0842131	-3.08906	up-regulated		UBE2QL1	0.0183424	0.452018	3.15054	0.00173376	0.040542	-4.04535	up-regulated
CTBP1-AS2	0.027752	0.51865	2.83469	0.00601963	0.300583	-4.33049	up-regulated-regulated		RP11-534L6.2	0.101556	0.553198	3.22378	0.00136296	0.0842131	-3.08946	up-regulated		RP11-126F18.2	0.0116634	0.796416	3.15013	0.00173614	0.040542	-4.04662	up-regulated
CTD-2001J20.1	0.127087	0.502013	2.83412	0.00602917	0.300583	-4.33195	up-regulated-regulated		LINC00944	0.0741649	0.241679	3.22283	0.00136737	0.0842131	-3.09245	up-regulated		CCND3P1	0.0132477	0.965584	3.14937	0.00174056	0.0405757	-4.04896	up-regulated
ZNF668	0.094398	0.533659	2.83342	0.00604103	0.300583	-4.33376	up-regulated-regulated		PRR21	0.101219	0.614339	3.22278	0.0013676	0.0842131	-3.0926	up-regulated		AC005009.2	0.0750399	0.798442	3.14866	0.00174468	0.0405757	-4.05115	up-regulated
HRAS	0.0172609	0.17437	2.83338	0.00604177	0.300583	-4.33387	up-regulated-regulated		TMEM211	0.0286735	0.516586	3.22174	0.00137245	0.0843014	-3.09588	up-regulated		RP11-587D21.4	0.0453089	0.504864	3.14848	0.00174572	0.0405757	-4.05169	up-regulated
RBM3	0.0266486	0.194474	2.83317	0.00604532	0.300583	-4.33441	up-regulated-regulated		IL7	0.0370253	0.331433	3.22054	0.00137809	0.0843014	-3.09967	up-regulated		PPIAP17	0.073359	0.758216	3.14743	0.00175187	0.0405757	-4.05494	up-regulated
SF1	0.0251156	0.789015	2.83293	0.00604932	0.300583	-4.33502	up-regulated-regulated		GRM6	0.0591001	0.539531	3.22051	0.00137821	0.0843014	-3.09975	up-regulated		TNRC18P2	0.031022	0.545996	3.14693	0.00175481	0.0405757	-4.05649	up-regulated
CYP4A22-AS1	0.0297521	0.149162	2.83277	0.00605199	0.300583	-4.33542	up-regulated-regulated		FPR1	0.0566035	0.412961	3.21999	0.00138066	0.0843014	-3.1014	up-regulated		AC013271.3	0.0282498	0.592475	3.14679	0.00175565	0.0405757	-4.05692	up-regulated
C3orf30	0.0815326	0.700618	2.83275	0.00605235	0.300583	-4.33548	up-regulated-regulated		PRB1	0.0683162	0.648415	3.2189	0.00138582	0.0844389	-3.10485	up-regulated		CSAG1	0.061665	0.595031	3.14653	0.00175716	0.0405757	-4.05772	up-regulated
CTD-2270P14.5	0.0103349	0.0338979	2.82953	0.00610703	0.300937	-4.34375	up-regulated-regulated		RBM15B	0.0376041	0.364035	3.21764	0.00139177	0.084624	-3.10881	up-regulated		FKBP1C	0.0470175	0.741259	3.14521	0.00176494	0.0406258	-4.06179	up-regulated
CTD-2544N14.3	0.118221	0.433866	2.82942	0.00610894	0.300937	-4.34404	up-regulated-regulated		ADAM29	0.0597557	0.259878	3.2124	0.00141677	0.0855498	-3.12527	up-regulated		C16orf78	0.0567975	0.481818	3.14431	0.00177027	0.0406518	-4.06457	up-regulated
RP11-649A18.12	0.102542	0.669147	2.82893	0.00611728	0.300937	-4.34529	up-regulated-regulated		RP11-437L7.1	0.189296	0.682617	3.21091	0.00142394	0.0855498	-3.12994	up-regulated		FRMD8P1	0.0255069	0.481506	3.14294	0.00177839	0.0407856	-4.06879	up-regulated
RP11-114G22.1	0.0781402	0.535459	2.82806	0.00613226	0.300937	-4.34754	up-regulated-regulated		VN1R3	0.0880411	0.459321	3.21051	0.0014259	0.0855498	-3.13121	up-regulated		RGPD3	0.0146702	0.673063	3.14286	0.00177891	0.0407856	-4.06906	up-regulated
PIDD1	0.01004	0.302011	2.82554	0.00617549	0.302228	-4.354	up-regulated-regulated		PRPF38AP1	0.0626622	0.568337	3.21042	0.00142632	0.0855498	-3.13148	up-regulated		RP11-756P10.3	0.0386336	0.395648	3.14127	0.0017884	0.0409062	-4.07397	up-regulated
BTRC	0.0171254	0.268341	2.82518	0.00618169	0.302228	-4.35492	up-regulated-regulated		MIR409	0.179951	0.631124	3.21022	0.00142732	0.0855498	-3.13213	up-regulated		CADM3	0.0304912	0.294671	3.13671	0.00181583	0.0414356	-4.088	up-regulated
RP11-753D20.1	0.0845798	0.519269	2.82188	0.00623882	0.303661	-4.36338	up-regulated-regulated		CYP51A1P2	0.1152	0.824848	3.21013	0.00142773	0.0855498	-3.1324	up-regulated		RP11-744K17.2	0.0465505	0.543266	3.13588	0.00182088	0.0415181	-4.09056	up-regulated
CTD-2555A7.2	0.0354957	0.483042	2.82048	0.00626334	0.303661	-4.36698	up-regulated-regulated		CCL3	0.0691527	0.323559	3.20986	0.00142903	0.0855498	-3.13324	up-regulated		FAM205A	0.016113	0.875067	3.13353	0.00183521	0.0417428	-4.09778	up-regulated
TMEM206	0.0105678	0.303321	2.8196	0.00627867	0.303661	-4.36923	up-regulated-regulated		RP11-161M6.5	0.0844793	0.480954	3.20911	0.00143269	0.0855498	-3.1356	up-regulated		REXO1L6P	0.0556019	0.857341	3.13193	0.00184505	0.0418401	-4.10271	up-regulated
PCYT1A	0.016556	0.348534	2.81907	0.00628789	0.303661	-4.37058	up-regulated-regulated		NUTF2P2	0.024141	0.913617	3.20825	0.00143688	0.0855498	-3.1383	up-regulated		AC069285.1	0.0468248	0.541841	3.13192	0.0018451	0.0418401	-4.10274	up-regulated
PRPF6	0.0113269	0.40886	2.81875	0.00629361	0.303661	-4.37141	up-regulated-regulated		RP11-468H14.2	0.0592958	0.905586	3.20817	0.00143727	0.0855498	-3.13855	up-regulated		PATE1	0.0567235	0.750162	3.13127	0.00184909	0.0418978	-4.10473	up-regulated
PRRC2C	0.0110296	0.349386	2.81679	0.00632804	0.304365	-4.37643	up-regulated-regulated		LINC01495	0.18421	0.653227	3.20738	0.00144111	0.0855498	-3.14102	up-regulated		AC104389.1	0.0584526	0.558353	3.13061	0.00185315	0.041957	-4.10675	up-regulated
KCNH3	0.0295179	0.345817	2.81568	0.00634753	0.304679	-4.37925	up-regulated-regulated		ADIPOQ	0.0382442	0.771481	3.20533	0.0014512	0.0855498	-3.14747	up-regulated		OR5D18	0.0615312	0.646238	3.12957	0.00185961	0.0420703	-4.10995	up-regulated
HLA-F	0.0201786	0.307092	2.81351	0.00638598	0.304679	-4.3848	up-regulated-regulated		SLC5A2	0.0438059	0.600518	3.20523	0.00145168	0.0855498	-3.14778	up-regulated		FTH1P6	0.0677225	0.849951	3.12904	0.00186292	0.0421125	-4.1116	up-regulated
RP1-111C20.4	0.0242813	0.370093	2.81238	0.00640618	0.304679	-4.3877	up-regulated-regulated		KRT18P16	0.0764164	0.837846	3.20425	0.00145651	0.0855498	-3.15084	up-regulated		GRIN2A	0.0342531	0.348993	3.12829	0.00186756	0.0421582	-4.11389	up-regulated
SLC29A2	0.0126717	0.198935	2.81173	0.00641776	0.304679	-4.38936	up-regulated-regulated		PRTG	0.0288756	0.381675	3.20345	0.00146044	0.0855498	-3.15333	up-regulated		TNR	0.0474209	0.44788	3.12799	0.00186943	0.0421611	-4.11481	up-regulated
PLAGL1	0.015639	0.250908	2.81126	0.00642611	0.304679	-4.39056	up-regulated-regulated		ADAM21P1	0.0363877	0.245914	3.20337	0.00146085	0.0855498	-3.15359	up-regulated		AL512505.1	0.0333993	0.881359	3.12362	0.00189685	0.042421	-4.12823	up-regulated
MIR521-1	0.0685497	0.549383	2.81112	0.00642861	0.304679	-4.39091	up-regulated-regulated		RPL13AP5	0.0456854	0.402212	3.20336	0.00146091	0.0855498	-3.15363	up-regulated		SRP72P1	0.0261741	0.883683	3.11784	0.00193367	0.0428435	-4.14593	up-regulated
EMB	0.0241727	0.276289	2.81002	0.00644834	0.304679	-4.39373	up-regulated-regulated		CTD-2210P24.1	0.0945433	0.674151	3.20242	0.00146556	0.0855498	-3.15657	up-regulated		LINC01139	0.0169445	0.137137	3.11607	0.00194505	0.0429732	-4.15134	up-regulated
PHF12	0.0200583	0.197438	2.80789	0.00648661	0.304679	-4.39916	up-regulated-regulated		CTAGE1	0.0536029	0.795573	3.20152	0.00147006	0.0855498	-3.1594	up-regulated		RP1	0.0578404	0.587908	3.11555	0.00194841	0.0429732	-4.15293	up-regulated
TDGF1P3	0.0629473	0.621619	2.80743	0.00649503	0.304679	-4.40035	up-regulated-regulated		AC106801.1	0.173171	0.702177	3.20031	0.00147609	0.0855498	-3.16318	up-regulated		AC145123.2	0.0410557	0.887033	3.11286	0.00196589	0.0432601	-4.16115	up-regulated
GKN1	0.0670856	0.615082	2.80669	0.0065084	0.304679	-4.40224	up-regulated-regulated		AL132709.2	0.138092	0.759974	3.19976	0.00147885	0.0855498	-3.16491	up-regulated		TNN	0.0417113	0.516294	3.11256	0.00196789	0.0432711	-4.16209	up-regulated
RP11-512M8.5	0.0111655	0.218293	2.80628	0.00651583	0.304679	-4.40329	up-regulated-regulated		RP11-383H13.1	0.0692797	0.291376	3.19888	0.00148322	0.0855498	-3.16764	up-regulated		RP11-1217F2.1	0.0609988	0.826455	3.11121	0.00197669	0.043399	-4.1662	up-regulated
MYLK4	0.032582	0.674928	2.80584	0.00652367	0.304679	-4.40439	up-regulated-regulated		SCN11A	0.116487	0.504299	3.19761	0.00148963	0.0855498	-3.17162	up-regulated		PABPC1P12	0.0761511	0.731201	3.10708	0.00200396	0.0437986	-4.17881	up-regulated
MIR517B	0.0730534	0.364446	2.80526	0.00653418	0.30468	-4.40587	up-regulated-regulated		RP11-766F14.2	0.0890719	0.721103	3.19701	0.00149265	0.0855498	-3.17349	up-regulated		OR10AG1	0.0210859	0.191121	3.10508	0.00201725	0.0439173	-4.18489	up-regulated
CCL3	0.0619216	0.307666	2.80249	0.00658477	0.306546	-4.41295	up-regulated-regulated		CTD-2161E19.1	0.120872	0.866648	3.1969	0.00149324	0.0855498	-3.17386	up-regulated		WI2-89031B12.1	0.0218369	0.907199	3.10489	0.00201851	0.0439173	-4.18547	up-regulated
SLC25A10	0.0190112	0.59501	2.80159	0.00660127	0.306822	-4.41525	up-regulated-regulated		SIGLEC12	0.0917304	0.423826	3.19685	0.00149346	0.0855498	-3.17399	up-regulated		A2MP1	0.0371826	0.602026	3.10463	0.00202027	0.0439173	-4.18627	up-regulated
WDR38	0.0269126	0.450635	2.79882	0.00665219	0.307515	-4.42231	up-regulated-regulated		RP11-347H15.4	0.0600689	0.408948	3.19603	0.00149764	0.0855498	-3.17658	up-regulated		ACTBP13	0.025903	0.807127	3.10427	0.00202266	0.0439173	-4.18736	up-regulated
RP11-540B6.2	0.0414724	0.927974	2.79804	0.00666665	0.307515	-4.4243	up-regulated-regulated		TMEM132C	0.0726158	0.381144	3.19531	0.00150127	0.0855498	-3.17881	up-regulated		AC000095.9	0.0179221	0.956534	3.10078	0.00204618	0.0442546	-4.198	up-regulated
HEMGN	0.0798055	0.435611	2.79679	0.00668971	0.307515	-4.42747	up-regulated-regulated		ARHGAP9	0.0227097	0.348179	3.19502	0.00150274	0.0855498	-3.17972	up-regulated		FAM197Y6	0.0511638	0.489669	3.10018	0.00205026	0.0442979	-4.19983	up-regulated
AGPAT4	0.0342391	0.537459	2.79647	0.00669557	0.307515	-4.42827	up-regulated-regulated		C22orf34	0.0827682	0.48595	3.19357	0.00151014	0.0855498	-3.18426	up-regulated		SDCCAG3P2	0.024318	0.57196	3.09767	0.00206737	0.0445137	-4.20748	up-regulated
PRR25	0.042966	0.382718	2.79609	0.00670264	0.307515	-4.42924	up-regulated-regulated		DCHS2	0.0648359	0.359846	3.19324	0.00151182	0.0855498	-3.18528	up-regulated		AC125634.1	0.0388808	0.623664	3.09635	0.00207639	0.0445961	-4.21149	up-regulated
OR2AG1	0.0971383	0.31715	2.795	0.00672296	0.307515	-4.43202	up-regulated-regulated		PABPC1P12	0.157252	0.736138	3.19296	0.00151325	0.0855498	-3.18616	up-regulated		TAF1L	0.0863641	0.617926	3.09621	0.00207735	0.0445961	-4.21191	up-regulated
RP11-680B3.2	0.071249	0.474205	2.7949	0.00672491	0.307515	-4.43228	up-regulated-regulated		ANKRD34C	0.0394941	0.889044	3.1928	0.0015141	0.0855498	-3.18667	up-regulated		RP11-16L9.1	0.0409109	0.709812	3.09423	0.002091	0.0447383	-4.21794	up-regulated
CCDC137	0.0140414	0.276968	2.7939	0.00674343	0.307515	-4.43481	up-regulated-regulated		RP3-418C23.2	0.0514058	0.384075	3.19237	0.00151628	0.0855498	-3.188	up-regulated		TMEM132C	0.0347536	0.378914	3.09147	0.00211012	0.0449668	-4.22631	up-regulated
RPL35	0.0393066	0.652429	2.79017	0.00681365	0.309475	-4.44431	up-regulated-regulated		RBM5	0.0209866	0.395731	3.19182	0.00151909	0.0855498	-3.18971	up-regulated		AP000350.7	0.0342745	0.89109	3.09097	0.00211359	0.0449899	-4.22782	up-regulated
RPS8	0.0378786	0.451185	2.79011	0.00681465	0.309475	-4.44445	up-regulated-regulated		BLACE	0.0285971	0.226847	3.18934	0.00153187	0.085936	-3.19746	up-regulated		DYRK4	0.0136096	0.483388	3.09035	0.00211792	0.0449936	-4.2297	up-regulated
PSMD9	0.0126878	0.2553	2.78874	0.00684068	0.309475	-4.44795	up-regulated-regulated		TAAR9	0.139367	0.691378	3.18679	0.00154511	0.0863966	-3.2054	up-regulated		RP11-320N7.1	0.0765291	0.585661	3.08736	0.0021389	0.0453137	-4.23877	up-regulated
MIR518B	0.0343142	0.421992	2.7887	0.00684141	0.309475	-4.44804	up-regulated-regulated		ADAM6	0.0686033	0.668579	3.1861	0.00154871	0.0863966	-3.20755	up-regulated		SLX1A-SULT1A3	0.0343682	0.712959	3.08592	0.00214909	0.0454633	-4.24314	up-regulated
LAGE3	0.0480649	0.133583	2.78823	0.00685022	0.309475	-4.44922	up-regulated-regulated		FGA	0.0975763	0.400097	3.18604	0.00154902	0.0863966	-3.20774	up-regulated		RP11-529H20.3	0.0325353	0.754465	3.08393	0.00216325	0.0455823	-4.24918	up-regulated
RP3-507I15.2	0.110732	0.86295	2.78822	0.00685043	0.309475	-4.44925	up-regulated-regulated		LINC01346	0.057355	0.389283	3.18477	0.00155568	0.0866015	-3.2117	up-regulated		PRRG3	0.0346509	0.427168	3.08276	0.00217155	0.0455823	-4.2527	up-regulated
RRAS	0.0142033	0.143675	2.78595	0.00689367	0.310944	-4.45502	up-regulated-regulated		PABPC1P6	0.145986	0.60074	3.18411	0.00155919	0.0866304	-3.21378	up-regulated		OR7E83P	0.0349444	0.656753	3.08223	0.00217534	0.0455823	-4.2543	up-regulated
DSCR4	0.0152674	0.162273	2.78346	0.0069412	0.311706	-4.46133	up-regulated-regulated		HRH2	0.0632396	0.428659	3.18043	0.00157865	0.0868382	-3.22523	up-regulated		CTD-2015G9.2	0.0331349	0.354787	3.08154	0.0021803	0.0455823	-4.2564	up-regulated
GFRAL	0.0624258	0.245666	2.7828	0.00695389	0.311706	-4.463	up-regulated-regulated		BCL11A	0.0462593	0.356607	3.18008	0.00158051	0.0868382	-3.22632	up-regulated		SOCS5P3	0.035937	0.65767	3.08152	0.00218043	0.0455823	-4.25645	up-regulated
GPR125	0.016258	0.422318	2.78228	0.00696397	0.311706	-4.46433	up-regulated-regulated		GRINA	0.010797	0.395415	3.17977	0.00158217	0.0868382	-3.22729	up-regulated		MIR7160	0.0275675	0.653266	3.07904	0.0021983	0.0458356	-4.26396	up-regulated
C1orf52	0.0215075	0.25811	2.78184	0.00697247	0.311706	-4.46545	up-regulated-regulated		RPL13AP23	0.0549557	0.910307	3.17886	0.00158699	0.0868382	-3.23009	up-regulated		RP11-429A20.2	0.031404	0.423492	3.07596	0.00222071	0.0461099	-4.27328	up-regulated
MS4A13	0.093486	0.811464	2.7817	0.00697505	0.311706	-4.46579	up-regulated-regulated		RP3-437I16.1	0.0808042	0.393069	3.17874	0.00158762	0.0868382	-3.23046	up-regulated		TLR12P	0.0226022	0.80907	3.07516	0.00222655	0.0461504	-4.2757	up-regulated
RP11-94P11.4	0.0558629	0.29978	2.77837	0.00703947	0.313479	-4.47422	up-regulated-regulated		SLC8A3	0.0488503	0.531444	3.17746	0.00159449	0.0868382	-3.23445	up-regulated		ADCYAP1R1	0.0388724	0.362339	3.07488	0.00222856	0.0461504	-4.27653	up-regulated
UNC93B2	0.0224637	0.178695	2.77808	0.00704525	0.313479	-4.47497	up-regulated-regulated		TLR2	0.0974608	0.550203	3.17637	0.00160039	0.0868382	-3.23786	up-regulated		PROX1	0.026207	0.377671	3.06889	0.00227283	0.0469173	-4.2946	up-regulated
C9orf89	0.0136365	0.112215	2.7755	0.00709555	0.314547	-4.48149	up-regulated-regulated		BCAR1P2	0.0664108	0.901905	3.17602	0.00160223	0.0868382	-3.23892	up-regulated		CT45A1	0.0282029	0.485637	3.06757	0.00228275	0.0470327	-4.2986	up-regulated
LA16c-381G6.1	0.015677	0.212897	2.77232	0.00715811	0.314547	-4.48954	up-regulated-regulated		HLA-DQA2	0.0586979	0.43818	3.17582	0.00160332	0.0868382	-3.23955	up-regulated		MRGPRX3	0.0293584	0.513719	3.06749	0.00228328	0.0470327	-4.29882	up-regulated
RP11-89K18.1	0.0550756	0.886404	2.77199	0.00716463	0.314547	-4.49037	up-regulated-regulated		AC067945.2	0.0361109	0.443009	3.17563	0.00160434	0.0868382	-3.24013	up-regulated		AC025016.1	0.0534408	0.619434	3.06616	0.00229332	0.0471724	-4.30285	up-regulated
RPL8	0.0399593	0.336934	2.77181	0.00716811	0.314547	-4.49082	up-regulated-regulated		CD84	0.100582	0.374271	3.17543	0.00160544	0.0868382	-3.24076	up-regulated		CYP2A7P1	0.0321893	0.366684	3.06526	0.00230007	0.0472444	-4.30555	up-regulated
RPLP1	0.0297895	0.132263	2.77176	0.00716919	0.314547	-4.49095	up-regulated-regulated		MIR381HG	0.117733	0.673534	3.17449	0.00161051	0.0868382	-3.24368	up-regulated		RP11-495P10.5	0.0206012	0.882685	3.06459	0.00230515	0.0472693	-4.30757	up-regulated
RP3-510D11.1	0.0308341	0.317733	2.77151	0.0071741	0.314547	-4.49158	up-regulated-regulated		AC011343.1	0.0804772	0.462039	3.17436	0.00161125	0.0868382	-3.2441	up-regulated		RP11-1137G4.4	0.0437847	0.401058	3.06417	0.00230832	0.0472797	-4.30884	up-regulated
RAVER2	0.0211956	0.336548	2.77123	0.00717956	0.314547	-4.49228	up-regulated-regulated		MIR892C	0.20292	0.715627	3.17408	0.00161276	0.0868382	-3.24497	up-regulated		OR10AD1	0.020293	0.537981	3.06275	0.00231907	0.0473996	-4.31311	up-regulated
MBTD1	0.0158952	0.197641	2.77123	0.0071796	0.314547	-4.49228	up-regulated-regulated		LINC00632	0.0562158	0.271406	3.17386	0.00161395	0.0868382	-3.24565	up-regulated		FAM197Y4	0.0378431	0.434664	3.06062	0.00233533	0.0476647	-4.31952	up-regulated
SCGB1D1	0.0455807	0.597172	2.76898	0.0072242	0.315868	-4.49796	up-regulated-regulated		USP29	0.0551577	0.560765	3.173	0.0016186	0.0868382	-3.2483	up-regulated		DEFB4A	0.0309188	0.824916	3.05995	0.00234039	0.0476814	-4.32151	up-regulated
MIR216B	0.0741156	0.771222	2.76838	0.00723618	0.315868	-4.49948	up-regulated-regulated		OR1A1	0.125931	0.597552	3.17216	0.00162318	0.0868382	-3.25091	up-regulated		ADAMTS7P1	0.0151754	0.841596	3.05944	0.00234437	0.0476814	-4.32307	up-regulated
GSTCD	0.0113901	0.174997	2.76742	0.00725545	0.315868	-4.50191	up-regulated-regulated		GPR133	0.0732415	0.487863	3.17191	0.00162453	0.0868382	-3.25168	up-regulated		RP11-740P5.3	0.0245926	0.211662	3.0569	0.00236387	0.0479798	-4.33068	up-regulated
LINC00392	0.0659917	0.936102	2.76669	0.00726991	0.315868	-4.50374	up-regulated-regulated		PAGE1	0.098436	0.391009	3.1718	0.00162518	0.0868382	-3.25205	up-regulated		LA16c-444G7.1	0.0126691	0.454488	3.05687	0.00236409	0.0479798	-4.33077	up-regulated
RP11-216L13.17	0.0125317	0.0777538	2.76504	0.00730308	0.315868	-4.50791	up-regulated-regulated		PARK2	0.0626478	0.621385	3.17168	0.0016258	0.0868382	-3.2524	up-regulated		RP11-575F12.2	0.046427	0.468257	3.05682	0.00236449	0.0479798	-4.33092	up-regulated
MICB	0.0197841	0.261576	2.76416	0.00732079	0.315868	-4.51013	up-regulated-regulated		TDRD9	0.0395717	0.573579	3.17038	0.00163292	0.0870583	-3.25643	up-regulated		SSX9	0.0596177	0.718975	3.05361	0.00238947	0.0481933	-4.34057	up-regulated
ENO3	0.0101113	0.199752	2.76331	0.00733793	0.315868	-4.51227	up-regulated-regulated		SLAMF1	0.110283	0.458215	3.16902	0.00164043	0.0872688	-3.26067	up-regulated		ERHP2	0.0671596	0.758195	3.05326	0.0023922	0.0482147	-4.34162	up-regulated
SLC4A8	0.0292779	0.515364	2.76306	0.00734299	0.315868	-4.5129	up-regulated-regulated		GOLGA1	0.0199581	0.589929	3.16857	0.00164289	0.0872688	-3.26205	up-regulated		TNXA	0.0247209	0.648416	3.05153	0.00240572	0.0482699	-4.34679	up-regulated
PPIL4	0.0105144	0.0833491	2.76189	0.0073666	0.315868	-4.51584	up-regulated-regulated		OR6C6	0.169619	0.805983	3.16733	0.00164974	0.0874723	-3.26589	up-regulated		AC126323.2	0.0237383	0.810918	3.0451	0.0024567	0.0490039	-4.36604	up-regulated
FTL	0.0208467	0.162868	2.76188	0.00736683	0.315868	-4.51587	up-regulated-regulated		TMEM155	0.122571	0.678614	3.16435	0.00166636	0.0881924	-3.27514	up-regulated		OR8I2	0.0759879	0.596351	3.04339	0.00247049	0.0492062	-4.37118	up-regulated
AC007381.2	0.0702937	0.412879	2.76077	0.0073895	0.315868	-4.51868	up-regulated-regulated		AC009166.5	0.138498	0.627719	3.16349	0.00167115	0.0882848	-3.27779	up-regulated		LINC01435	0.025836	0.29247	3.04166	0.00248441	0.0493868	-4.37634	up-regulated
C6orf89	0.0131417	0.182142	2.76025	0.00739999	0.315868	-4.51998	up-regulated-regulated		CNN2P12	0.132479	0.581301	3.16248	0.00167683	0.088424	-3.28092	up-regulated		HNRNPDP1	0.0466357	0.668338	3.04023	0.00249607	0.0495506	-4.38063	up-regulated
ETV3	0.0355362	0.277672	2.75997	0.00740579	0.315868	-4.5207	up-regulated-regulated		OR7G1	0.156943	0.632468	3.16048	0.0016881	0.0887431	-3.2871	up-regulated		ARHGAP23P1	0.0453826	0.681567	3.0377	0.00251666	0.0497858	-4.38817	up-regulated
AL163953.3	0.0561272	0.47595	2.75749	0.00745634	0.316769	-4.52693	up-regulated-regulated		SLC25A24	0.0771753	0.399808	3.16	0.00169086	0.0887431	-3.2886	up-regulated		CTC-297N7.9	0.0311122	0.315312	3.03768	0.00251679	0.0497858	-4.38822	up-regulated
SNRNP200	0.0168602	0.353621	2.75471	0.00751348	0.316769	-4.53392	up-regulated-regulated		MS4A4A	0.11303	0.522431	3.15848	0.00169948	0.0887431	-3.29329	up-regulated		SNTG1	0.0334957	0.426873	3.03763	0.00251726	0.0497858	-4.38839	up-regulated
UBE2E1	0.0171997	0.312631	2.75462	0.00751535	0.316769	-4.53415	up-regulated-regulated		ANO5	0.083048	0.268347	3.15777	0.00170352	0.0887431	-3.29549	up-regulated		RP13-150K15.1	0.0704028	0.759254	3.03735	0.00251951	0.0497858	-4.38921	up-regulated
GFPT2	0.0270093	0.59376	2.7545	0.00751786	0.316769	-4.53445	up-regulated-regulated		LINC00388	0.0979981	0.648841	3.15771	0.00170388	0.0887431	-3.29568	up-regulated		RETSAT	0.0117678	0.863473	3.03545	0.00253517	0.0499848	-4.3949	up-regulated
RP11-42I10.1	0.0391964	0.262752	2.7544	0.00752002	0.316769	-4.53472	up-regulated-regulated		AC008984.2	0.044644	0.334274	3.15763	0.0017043	0.0887431	-3.29591	up-regulated		SPAG11A	0.0403803	0.558005	3.03307	0.0025548	0.0502693	-4.40197	up-regulated
NSUN2	0.0114711	0.349389	2.75343	0.00753995	0.316769	-4.53714	up-regulated-regulated		AC004156.3	0.0175043	0.190961	3.15654	0.00171056	0.088909	-3.29929	up-regulated		RP11-434D2.10	0.0131495	0.877611	3.03233	0.00256099	0.0503227	-4.40419	up-regulated
RP11-427J23.1	0.0629615	0.386883	2.75226	0.00756417	0.316769	-4.54007	up-regulated-regulated		MAGEA6	0.144062	0.796893	3.15374	0.00172664	0.08922	-3.30792	up-regulated		TPRX1	0.0224333	0.5233	3.03131	0.00256952	0.0504104	-4.40724	up-regulated
ZNF606	0.0230464	0.927364	2.75056	0.00759956	0.316769	-4.54435	up-regulated-regulated		CCL18	0.0516383	0.386691	3.15373	0.00172674	0.08922	-3.30797	up-regulated		CTD-2544M6.1	0.0286293	0.293789	3.03117	0.00257066	0.0504104	-4.40765	up-regulated
RP11-165I9.9	0.106294	0.700546	2.75047	0.00760158	0.316769	-4.54459	up-regulated-regulated		CICP9	0.0599443	0.832549	3.15315	0.00173008	0.08922	-3.30975	up-regulated		LINC01317	0.0151845	0.509239	3.02731	0.00260309	0.0507717	-4.41915	up-regulated
TCHH	0.047271	0.356926	2.75046	0.00760166	0.316769	-4.5446	up-regulated-regulated		MS4A1	0.0527024	0.860826	3.15301	0.00173088	0.08922	-3.31018	up-regulated		USP29	0.0268183	0.55902	3.02443	0.00262747	0.0511718	-4.4277	up-regulated
MIR216A	0.0488718	0.341269	2.74668	0.00768103	0.318201	-4.55411	up-regulated-regulated		BSPH1	0.0473924	0.411497	3.15228	0.00173513	0.08922	-3.31244	up-regulated		RP11-897M7.4	0.0139695	0.110282	3.02307	0.00263914	0.0513366	-4.43176	up-regulated
RHPN1	0.0157248	0.539385	2.74573	0.00770099	0.318201	-4.55648	up-regulated-regulated		CTA-299D3.8	0.0998511	0.84741	3.15222	0.00173544	0.08922	-3.3126	up-regulated		RFPL1S	0.0212726	0.413065	3.02187	0.00264935	0.0514131	-4.4353	up-regulated
AP002884.2	0.0112706	0.296164	2.74444	0.00772817	0.318201	-4.5597	up-regulated-regulated		COL4A1	0.063236	0.515806	3.15177	0.00173807	0.08922	-3.314	up-regulated		MUC16	0.0678946	0.646329	3.0201	0.00266462	0.0516246	-4.44057	up-regulated
SNAPC5	0.0685315	0.820296	2.74235	0.00777258	0.318783	-4.56495	up-regulated-regulated		MXRA5Y	0.109268	0.582268	3.15068	0.00174441	0.0892835	-3.31736	up-regulated		RNA5-8SP2	0.0247106	0.597142	3.01947	0.00267005	0.0516952	-4.44243	up-regulated
APLP1	0.0218712	0.327063	2.7418	0.00778425	0.318783	-4.56632	up-regulated-regulated		RP11-2C7.1	0.118517	0.827523	3.15038	0.00174618	0.0892835	-3.31829	up-regulated		CEACAM8	0.028681	0.431515	3.01891	0.00267489	0.0517544	-4.44409	up-regulated
TBL3	0.0166169	0.835729	2.74048	0.00781248	0.318783	-4.56963	up-regulated-regulated		OR1J2	0.113174	0.560162	3.14948	0.00175144	0.0892835	-3.32107	up-regulated		CTB-55O6.4	0.0107804	0.186293	3.01684	0.00269285	0.0519632	-4.45023	up-regulated
AVEN	0.052337	0.231119	2.73923	0.00783922	0.318783	-4.57276	up-regulated-regulated		PGLYRP3	0.0925077	0.325221	3.14879	0.00175547	0.0892835	-3.32319	up-regulated		RP11-744N12.3	0.0433286	0.598107	3.01651	0.00269579	0.0519853	-4.45123	up-regulated
PRKAB1	0.010976	0.176031	2.73841	0.00785684	0.318783	-4.57481	up-regulated-regulated		LGSN	0.139106	0.659419	3.1477	0.0017619	0.0892835	-3.32656	up-regulated		WSCD1	0.023706	0.468213	3.01629	0.00269765	0.0519867	-4.45186	up-regulated
VPS53	0.0103777	0.536459	2.73832	0.00785874	0.318783	-4.57503	up-regulated-regulated		MFAP5	0.105036	0.772883	3.14763	0.00176228	0.0892835	-3.32676	up-regulated		AJAP1	0.0291906	0.497853	3.01404	0.00271741	0.0521596	-4.45855	up-regulated
MIR512-2	0.120997	0.818996	2.73809	0.00786379	0.318783	-4.57562	up-regulated-regulated		RP11-30P6.1	0.0739163	0.566993	3.14748	0.00176317	0.0892835	-3.32722	up-regulated		RP11-166D19.1	0.0512598	0.446772	3.01273	0.00272894	0.0522281	-4.46243	up-regulated
ZNF207	0.0239708	0.507497	2.73785	0.00786893	0.318783	-4.57622	up-regulated-regulated		LCE3A	0.0893638	0.355536	3.14735	0.00176394	0.0892835	-3.32762	up-regulated		LILRA4	0.0421534	0.441276	3.01244	0.00273147	0.0522281	-4.46328	up-regulated
ZFP57	0.0606133	0.528379	2.73704	0.00788635	0.318783	-4.57824	up-regulated-regulated		TMEM209	0.0144768	0.116434	3.14638	0.00176971	0.089295	-3.33063	up-regulated		FUT3	0.0161355	0.821108	3.01085	0.00274557	0.0523192	-4.468	up-regulated
ABCB10P1	0.0644368	0.613499	2.73695	0.00788839	0.318783	-4.57847	up-regulated-regulated		RP11-411B10.6	0.12487	0.805315	3.14627	0.00177032	0.089295	-3.33095	up-regulated		EXOC5P1	0.0609929	0.693604	3.01005	0.00275266	0.0523351	-4.47036	up-regulated
RP11-1E11.1	0.0605152	0.521143	2.73635	0.0079012	0.318783	-4.57996	up-regulated-regulated		OR7C2	0.0705227	0.354705	3.1438	0.00178498	0.0897308	-3.33856	up-regulated		AC011516.1	0.0363808	0.272499	3.01004	0.00275276	0.0523351	-4.47039	up-regulated
LSM12	0.012325	0.231777	2.73635	0.00790127	0.318783	-4.57997	up-regulated-regulated		CXCR1	0.0671446	0.450922	3.14377	0.00178515	0.0897308	-3.33864	up-regulated		AC079325.6	0.0510217	0.661566	3.00984	0.00275453	0.0523351	-4.47098	up-regulated
MIR518F	0.0276278	0.136019	2.73628	0.00790279	0.318783	-4.58014	up-regulated-regulated		TRIM55	0.0606975	0.535819	3.14293	0.00179016	0.0897422	-3.34122	up-regulated		MRGPRX1	0.0520849	0.542154	3.00692	0.00278059	0.0526651	-4.47961	up-regulated
SPTB	0.0162056	0.394488	2.73429	0.00794605	0.319157	-4.58513	up-regulated-regulated		RP11-347D21.1	0.0564174	0.284606	3.1427	0.00179156	0.0897422	-3.34195	up-regulated		CDH13	0.0326211	0.401862	3.00648	0.00278456	0.0526651	-4.48091	up-regulated
EIF2B1	0.0104091	0.230359	2.73309	0.00797204	0.319157	-4.58812	up-regulated-regulated		MS4A6E	0.0199505	0.203109	3.14062	0.00180401	0.0899405	-3.34833	up-regulated		PSG8	0.0380145	0.482333	3.00589	0.00278982	0.0527117	-4.48264	up-regulated
MIR1323	0.110573	0.592041	2.73281	0.00797811	0.319157	-4.58882	up-regulated-regulated		FAM197Y9	0.0894581	0.568984	3.1402	0.00180655	0.0899405	-3.34963	up-regulated		SLC26A5	0.0215728	0.551701	3.00555	0.0027929	0.0527117	-4.48365	up-regulated
ENTHD1	0.028958	0.615613	2.73088	0.0080203	0.319963	-4.59364	up-regulated-regulated		AC009729.1	0.120901	0.56305	3.13972	0.00180947	0.0899405	-3.35112	up-regulated		AC015849.16	0.0214449	0.840881	3.00468	0.00280073	0.0528151	-4.48622	up-regulated
NAV2	0.0716551	0.425578	2.72734	0.00809827	0.32194	-4.60248	up-regulated-regulated		RP11-134D3.2	0.122461	0.661895	3.13936	0.00181166	0.0899405	-3.35223	up-regulated		CTD-2576F9.2	0.0787801	0.876118	3.00241	0.00282131	0.0530995	-4.49292	up-regulated
UVSSA	0.0103237	0.576227	2.72596	0.00812878	0.32194	-4.60592	up-regulated-regulated		EPS8L3	0.0401821	0.81578	3.13889	0.00181446	0.0899405	-3.35365	up-regulated		CTD-2247C11.1	0.0231738	0.227304	2.99979	0.00284525	0.0532736	-4.50066	up-regulated
NTMT1	0.0305062	0.2192	2.72558	0.00813718	0.32194	-4.60686	up-regulated-regulated		RP11-487E13.1	0.172171	0.58796	3.1388	0.00181504	0.0899405	-3.35395	up-regulated		WEE2	0.0150859	0.896375	2.99928	0.00284987	0.0533132	-4.50215	up-regulated
KRT77	0.0408196	0.560877	2.72337	0.00818641	0.32194	-4.61237	up-regulated-regulated		SSX2	0.0482001	0.407922	3.13843	0.00181723	0.0899405	-3.35506	up-regulated		AC091493.2	0.0887397	0.611249	2.99896	0.00285288	0.0533132	-4.50312	up-regulated
CTD-2517M22.17	0.0276781	0.710214	2.72326	0.00818892	0.32194	-4.61265	up-regulated-regulated		ASB15	0.0448584	0.596397	3.13716	0.00182494	0.0901682	-3.35896	up-regulated		RFPL1	0.0105912	0.641418	2.99685	0.00287228	0.0535378	-4.50932	up-regulated
AC226119.5	0.0109047	0.123146	2.72297	0.00819534	0.32194	-4.61337	up-regulated-regulated		IGHV3OR16-12	0.0676317	0.309907	3.13592	0.0018325	0.0903878	-3.36277	up-regulated		ZNF280A	0.0327863	0.570349	2.99665	0.00287413	0.0535378	-4.50991	up-regulated
MRPS31P2	0.0672887	0.361214	2.72285	0.00819792	0.32194	-4.61366	up-regulated-regulated		RP11-466I1.1	0.0586048	0.478134	3.13394	0.00184466	0.090833	-3.36886	up-regulated		CYP2C8	0.0128622	0.210948	2.9961	0.00287924	0.0535985	-4.51154	up-regulated
ZC3H14	0.0105602	0.235345	2.72208	0.00821528	0.32194	-4.61559	up-regulated-regulated		RCVRN	0.0578247	0.427759	3.13343	0.0018478	0.0908337	-3.37043	up-regulated		ZIM3	0.024599	0.404057	2.99534	0.00288625	0.0536845	-4.51377	up-regulated
TUBB	0.0132762	0.159214	2.72202	0.00821657	0.32194	-4.61573	up-regulated-regulated		TARID	0.0554411	0.293212	3.13154	0.00185946	0.0912318	-3.37623	up-regulated		RP11-707O23.5	0.016479	0.806831	2.99516	0.00288798	0.0536845	-4.51431	up-regulated
HDDC2	0.03165	0.474515	2.72113	0.00823663	0.32194	-4.61796	up-regulated-regulated		DSCR4	0.0128893	0.162148	3.13069	0.00186473	0.0912318	-3.37883	up-regulated		RP11-480G3.1	0.0818914	0.67519	2.995	0.00288941	0.0536845	-4.51477	up-regulated
ZSCAN5A	0.0180656	0.654804	2.72006	0.00826053	0.32194	-4.62061	up-regulated-regulated		MIR299	0.121408	0.658567	3.13059	0.00186534	0.0912318	-3.37913	up-regulated		AC011516.2	0.0306863	0.399796	2.99407	0.00289807	0.0538109	-4.51751	up-regulated
RNF144B	0.0172147	0.180306	2.71885	0.00828793	0.32194	-4.62363	up-regulated-regulated		DCC	0.0586794	0.298986	3.12948	0.00187224	0.0913188	-3.38253	up-regulated		NPY6R	0.016762	0.66876	2.99249	0.00291286	0.053836	-4.52217	up-regulated
YBX1	0.0137521	0.227611	2.71838	0.00829845	0.32194	-4.62479	up-regulated-regulated		AP001347.6	0.0207942	0.337213	3.12929	0.00187342	0.0913188	-3.38312	up-regulated		RP11-857B24.1	0.0195489	0.526742	2.99175	0.00291973	0.0538684	-4.52433	up-regulated
ASB2	0.0458998	0.499372	2.71658	0.00833923	0.32194	-4.62927	up-regulated-regulated		CTD-3064M3.4	0.0493827	0.374323	3.12874	0.00187682	0.0913314	-3.38479	up-regulated		LINC01019	0.0555617	0.61187	2.98859	0.00294958	0.0543153	-4.53363	up-regulated
OR9A2	0.0448601	0.915972	2.71507	0.00837351	0.32194	-4.63302	up-regulated-regulated		ERICH4	0.0510769	0.404854	3.12631	0.00189209	0.0919202	-3.39225	up-regulated		ASTN1	0.026939	0.322308	2.98731	0.00296174	0.0544701	-4.5374	up-regulated
NLRP13	0.112174	0.775879	2.71501	0.00837507	0.32194	-4.63319	up-regulated-regulated		KIR3DX1	0.0864946	0.41309	3.12471	0.00190213	0.0922007	-3.39713	up-regulated		AC013402.3	0.0769106	0.628981	2.98621	0.00297222	0.0545773	-4.54063	up-regulated
C12orf76	0.0134092	0.330346	2.71426	0.00839206	0.32194	-4.63504	up-regulated-regulated		MDGA2	0.0497205	0.266552	3.12438	0.00190423	0.0922007	-3.39814	up-regulated		KB-1269D1.8	0.0259181	0.970314	2.98272	0.00300565	0.0548947	-4.55087	up-regulated
ZNF367	0.0129219	0.0675315	2.71349	0.00840976	0.32194	-4.63696	up-regulated-regulated		RP11-332L8.1	0.0427287	0.918801	3.123	0.00191299	0.0924708	-3.40237	up-regulated		RP11-575F12.1	0.016893	0.162291	2.98148	0.00301763	0.054988	-4.55451	up-regulated
DHRS7	0.0233015	0.206153	2.71343	0.00841105	0.32194	-4.6371	up-regulated-regulated		SBF1P1	0.127603	0.733674	3.12123	0.00192423	0.0928595	-3.40777	up-regulated		RP11-583F24.3	0.0705161	0.726708	2.97998	0.00303213	0.0551008	-4.55889	up-regulated
SLAIN1	0.0204134	0.384443	2.7127	0.00842776	0.32194	-4.63891	up-regulated-regulated		BIRC8	0.0456713	0.477976	3.11913	0.00193771	0.0933231	-3.41419	up-regulated		STK19B	0.0165839	0.835046	2.97967	0.00303516	0.0551214	-4.55981	up-regulated
MIR520A	0.075475	0.518108	2.71245	0.0084336	0.32194	-4.63955	up-regulated-regulated		OR10C1	0.102029	0.753623	3.11873	0.00194028	0.0933231	-3.41541	up-regulated		AC006548.28	0.0230468	0.551534	2.97904	0.00304124	0.0551973	-4.56164	up-regulated
MIR515-1	0.0766659	0.529155	2.71063	0.00847545	0.32194	-4.64407	up-regulated-regulated		CACNG3	0.0740852	0.351996	3.11571	0.0019598	0.0940557	-3.42463	up-regulated		AC020915.2	0.0470157	0.854342	2.97837	0.00304778	0.0552048	-4.5636	up-regulated
FCGR2A	0.0569545	0.639546	2.71017	0.00848601	0.32194	-4.6452	up-regulated-regulated		MUC16	0.14225	0.650673	3.11478	0.00196583	0.0940557	-3.42746	up-regulated		FAM136BP	0.0153174	0.872753	2.97755	0.00305581	0.0552722	-4.56601	up-regulated
RPL18AP16	0.0540975	0.425852	2.70992	0.00849175	0.32194	-4.64582	up-regulated-regulated		PTPRO	0.0449986	0.27766	3.11478	0.00196587	0.0940557	-3.42748	up-regulated		SLC1A6	0.0209576	0.310188	2.97701	0.00306111	0.055281	-4.56759	up-regulated
AC011343.1	0.0751066	0.446065	2.70917	0.00850912	0.32194	-4.64769	up-regulated-regulated		FTH1P6	0.135855	0.854454	3.11395	0.00197127	0.0940557	-3.43	up-regulated		MIR3164	0.0112471	0.786674	2.97595	0.00307154	0.055366	-4.57071	up-regulated
SLC25A30	0.0109753	0.236606	2.70894	0.00851439	0.32194	-4.64825	up-regulated-regulated		SIGLEC8	0.082983	0.421948	3.11316	0.00197645	0.0940557	-3.43242	up-regulated		CTD-2385L22.1	0.0755378	0.639741	2.97454	0.00308536	0.0555116	-4.57481	up-regulated
AC091729.8	0.0340739	0.495086	2.7087	0.00851993	0.32194	-4.64884	up-regulated-regulated		SMCP	0.0723397	0.337185	3.1119	0.00198468	0.0940557	-3.43624	up-regulated		RP11-846F4.11	0.0427777	0.718553	2.97342	0.00309648	0.0556082	-4.5781	up-regulated
EVA1A	0.0366821	0.350281	2.70834	0.00852826	0.32194	-4.64974	up-regulated-regulated		TMPRSS9	0.0372454	0.602917	3.11163	0.00198647	0.0940557	-3.43707	up-regulated		MIR3147	0.052439	0.56822	2.97219	0.00310869	0.0557584	-4.5817	up-regulated
RP11-541M12.6	0.088163	0.696646	2.70734	0.00855146	0.32194	-4.65222	up-regulated-regulated		RP11-767C1.1	0.0317104	0.692133	3.1113	0.00198865	0.0940557	-3.43808	up-regulated		RP11-1166P10.1	0.0318819	0.640982	2.96819	0.00314862	0.0562395	-4.59337	up-regulated
RBCK1	0.0204126	0.284301	2.70725	0.00855352	0.32194	-4.65244	up-regulated-regulated		HERC2P3	0.0405123	0.548071	3.11102	0.00199047	0.0940557	-3.43892	up-regulated		UBE2L5P	0.0231801	0.862457	2.96818	0.00314871	0.0562395	-4.5934	up-regulated
CTC-524C5.5	0.0105845	0.120725	2.70648	0.00857148	0.32194	-4.65435	up-regulated-regulated		THA1P	0.0126866	0.339162	3.11091	0.00199118	0.0940557	-3.43925	up-regulated		GYPC	0.0412785	0.335657	2.96785	0.00315205	0.0562577	-4.59437	up-regulated
PSMG3-AS1	0.0314007	0.589126	2.70638	0.00857385	0.32194	-4.6546	up-regulated-regulated		AP005901.1	0.0515628	0.601848	3.1086	0.00200652	0.0946259	-3.44631	up-regulated		RP11-110L15.1	0.0723841	0.324582	2.96675	0.00316316	0.0563543	-4.59758	up-regulated
TMEM198B	0.036162	0.792603	2.70372	0.00863595	0.32194	-4.66119	up-regulated-regulated		SLC35A1	0.0928341	0.84114	3.1071	0.00201647	0.0949065	-3.45087	up-regulated		CSH1	0.0273912	0.610313	2.96456	0.00318533	0.0566426	-4.60397	up-regulated
REG3G	0.0778874	0.317759	2.70352	0.0086407	0.32194	-4.66169	up-regulated-regulated		FTL	0.0190599	0.164117	3.10656	0.00202009	0.0949065	-3.45252	up-regulated		TFAP2D	0.0266345	0.191922	2.96339	0.00319724	0.0567432	-4.60738	up-regulated
ZBTB39	0.0241935	0.367946	2.7032	0.00864826	0.32194	-4.66249	up-regulated-regulated		AC002480.2	0.0481142	0.632356	3.1062	0.00202246	0.0949065	-3.4536	up-regulated		KCNA1	0.0277517	0.30489	2.96328	0.00319833	0.0567432	-4.60769	up-regulated
SRPRB	0.0251114	0.455661	2.70161	0.00868546	0.322297	-4.66641	up-regulated-regulated		AC018442.1	0.032101	0.576105	3.10574	0.00202555	0.0949065	-3.455	up-regulated		S100A7L2	0.0326675	0.370718	2.95996	0.00323237	0.0572044	-4.61737	up-regulated
BAI3	0.0173637	0.171191	2.70042	0.00871372	0.322297	-4.66937	up-regulated-regulated		MIR509-2	0.114887	0.316208	3.10441	0.00203444	0.0951692	-3.45903	up-regulated		RP11-453O5.1	0.0605778	0.800691	2.95556	0.00327796	0.0578289	-4.63017	up-regulated
ATP10A	0.0495895	0.531434	2.70032	0.00871603	0.322297	-4.66961	up-regulated-regulated		OR7A10	0.0677626	0.419487	3.1038	0.00203855	0.095208	-3.46089	up-regulated		CLVS2	0.0362195	0.292317	2.95492	0.00328471	0.0578424	-4.63205	up-regulated
TMED3	0.0148003	0.283285	2.70021	0.00871858	0.322297	-4.66988	up-regulated-regulated		RPRD1B	0.0178271	0.18904	3.10331	0.0020419	0.0952112	-3.4624	up-regulated		ADAMTS2	0.0218894	0.407127	2.9545	0.00328907	0.0578489	-4.63326	up-regulated
NUDT22	0.0140061	0.103206	2.69902	0.0087467	0.322297	-4.67282	up-regulated-regulated		ZNF679	0.0450809	0.273684	3.10207	0.00205024	0.0954465	-3.46615	up-regulated		GLTPP1	0.0188186	0.846256	2.95402	0.00329408	0.0578669	-4.63465	up-regulated
EEF2	0.0598092	0.339563	2.69824	0.00876524	0.322297	-4.67475	up-regulated-regulated		RP11-540B6.2	0.0400443	0.932525	3.10016	0.00206325	0.0954976	-3.47197	up-regulated		REXO1L3P	0.062465	0.84792	2.95316	0.00330308	0.0579481	-4.63714	up-regulated
KCNH1	0.0344638	0.446895	2.69694	0.00879624	0.322297	-4.67797	up-regulated-regulated		AC093230.2	0.13546	0.865036	3.09985	0.00206532	0.0954976	-3.47289	up-regulated		GRAMD1B	0.032332	0.41517	2.95291	0.00330575	0.0579481	-4.63788	up-regulated
ACER1	0.031982	0.358271	2.6969	0.00879722	0.322297	-4.67807	up-regulated-regulated		APBB1IP	0.0614026	0.230348	3.099	0.00207112	0.0954976	-3.47547	up-regulated		SEPHS1P6	0.03709	0.564146	2.95282	0.0033067	0.0579481	-4.63814	up-regulated
OR6F1	0.11033	0.606528	2.69678	0.00879997	0.322297	-4.67836	up-regulated-regulated		AC007403.2	0.0525069	0.888033	3.09891	0.00207177	0.0954976	-3.47576	up-regulated		H1FNT	0.0221522	0.716336	2.95195	0.00331584	0.0580145	-4.64067	up-regulated
MS4A12	0.0339033	0.4282	2.6961	0.0088162	0.322297	-4.68004	up-regulated-regulated		AC105339.1	0.062173	0.726146	3.09881	0.00207244	0.0954976	-3.47606	up-regulated		CASC4P1	0.0315885	0.572979	2.94992	0.00333733	0.0581337	-4.64657	up-regulated
RTCB	0.0292079	0.304379	2.69549	0.00883094	0.322297	-4.68156	up-regulated-regulated		SORCS1	0.0712498	0.390449	3.09861	0.00207378	0.0954976	-3.47665	up-regulated		DDI1	0.0593814	0.67614	2.94943	0.00334249	0.0581887	-4.64798	up-regulated
LINC01413	0.0166369	0.584928	2.69521	0.0088376	0.322297	-4.68225	up-regulated-regulated		ENTPD1-AS1	0.0202158	0.227197	3.09756	0.00208103	0.0956516	-3.47986	up-regulated		LINC01029	0.038077	0.358524	2.94839	0.0033535	0.0582754	-4.65098	up-regulated
RP11-19O2.2	0.151367	0.759496	2.6952	0.00883786	0.322297	-4.68228	up-regulated-regulated		TRIM40	0.0486806	0.453496	3.09642	0.00208886	0.0957603	-3.48332	up-regulated		LINC00029	0.0129918	0.261702	2.94692	0.00336922	0.0584784	-4.65525	up-regulated
RGS10	0.033681	0.537347	2.69487	0.00884557	0.322297	-4.68307	up-regulated-regulated		CARKD	0.0164088	0.489876	3.09604	0.00209148	0.0957603	-3.48447	up-regulated		MIR100HG	0.0415899	0.398612	2.94561	0.0033833	0.0585397	-4.65906	up-regulated
RPL34P27	0.0506904	0.368151	2.69299	0.00889073	0.322945	-4.68772	up-regulated-regulated		RP11-451O13.1	0.132205	0.600534	3.09577	0.0020933	0.0957603	-3.48527	up-regulated		SNAP25-AS1	0.0653745	0.784739	2.94546	0.00338486	0.0585397	-4.65948	up-regulated
DDX12P	0.0101924	0.153088	2.69118	0.00893457	0.322945	-4.6922	up-regulated-regulated		RIMKLB	0.0199477	0.28491	3.09338	0.00210989	0.096367	-3.49253	up-regulated		LINC01044	0.0420218	0.445656	2.94352	0.00340573	0.0587123	-4.6651	up-regulated
PEX7	0.0118608	0.104094	2.69069	0.00894646	0.322945	-4.69341	up-regulated-regulated		ASPA	0.0653961	0.645238	3.09288	0.00211335	0.0963713	-3.49404	up-regulated		GUSBP6	0.0463579	0.646287	2.94341	0.00340699	0.0587123	-4.66543	up-regulated
RP11-355F22.1	0.107222	0.709896	2.69053	0.00895026	0.322945	-4.6938	up-regulated-regulated		MIR6873	0.0214357	0.695735	3.09241	0.00211663	0.0963713	-3.49546	up-regulated		PSG1	0.0220782	0.258222	2.94285	0.00341301	0.0587464	-4.66705	up-regulated
RP11-467I20.3	0.0694298	0.671779	2.69038	0.00895395	0.322945	-4.69418	up-regulated-regulated		FNDC1	0.0548985	0.421199	3.08961	0.00213627	0.0970363	-3.50396	up-regulated		S100A7A	0.0375185	0.394538	2.9424	0.00341793	0.058796	-4.66836	up-regulated
LSM14A	0.0104335	0.0964652	2.6884	0.00900184	0.322945	-4.69904	up-regulated-regulated		MEDAG	0.0683445	0.495723	3.08937	0.00213792	0.0970363	-3.50467	up-regulated		ACAN	0.0247736	0.501676	2.94118	0.00343118	0.0589192	-4.6719	up-regulated
BSN	0.0335295	0.558568	2.68711	0.00903347	0.322945	-4.70224	up-regulated-regulated		GABRR2	0.0239771	0.710797	3.08801	0.00214755	0.0972446	-3.5088	up-regulated		RP11-164C12.1	0.053214	0.772516	2.93952	0.00344924	0.0591243	-4.67669	up-regulated
ZXDC	0.0138246	0.205096	2.68699	0.00903633	0.322945	-4.70253	up-regulated-regulated		NOL7	0.0127665	0.139582	3.0869	0.00215539	0.0972446	-3.51215	up-regulated		RNU105C	0.0505241	0.340224	2.9392	0.00345269	0.0591484	-4.6776	up-regulated
ZNF471	0.0188055	0.10354	2.68683	0.00904028	0.322945	-4.70293	up-regulated-regulated		TAAR6	0.127591	0.649244	3.08682	0.00215592	0.0972446	-3.51238	up-regulated		RP11-249C24.10	0.036967	0.773876	2.93837	0.00346183	0.0592351	-4.68002	up-regulated
ATAT1	0.0161017	0.474036	2.68533	0.00907701	0.322945	-4.70662	up-regulated-regulated		PSG10P	0.0495246	0.378187	3.08533	0.00216654	0.0972484	-3.51689	up-regulated		LINC00996	0.0256054	0.734141	2.93763	0.0034699	0.0593349	-4.68214	up-regulated
TDRD9	0.0389422	0.567391	2.6852	0.00908026	0.322945	-4.70695	up-regulated-regulated		OR2AJ1	0.0924343	0.839937	3.08515	0.00216778	0.0972484	-3.51742	up-regulated		RP11-33B1.4	0.0144551	0.897425	2.93611	0.00348673	0.0594506	-4.68656	up-regulated
AC008697.1	0.0393749	0.276763	2.68498	0.00908548	0.322945	-4.70747	up-regulated-regulated		LILRA6	0.0388416	0.435857	3.08499	0.00216892	0.0972484	-3.5179	up-regulated		ADCY8	0.0306564	0.299104	2.93545	0.00349401	0.0595398	-4.68846	up-regulated
LMNB2	0.0165712	0.478738	2.68451	0.0090972	0.322945	-4.70865	up-regulated-regulated		VAMP3	0.0102399	0.349924	3.08417	0.00217481	0.0972484	-3.52039	up-regulated		RP11-1J11.1	0.0277627	0.769603	2.934	0.00351005	0.0597591	-4.69264	up-regulated
RP5-884C9.2	0.04321	0.679245	2.68171	0.00916608	0.323934	-4.71552	up-regulated-regulated		SNX18P23	0.0891672	0.675249	3.08401	0.00217592	0.0972484	-3.52087	up-regulated		CTD-2197I11.1	0.0413367	0.76743	2.93377	0.0035126	0.0597591	-4.6933	up-regulated
MS4A1	0.0614458	0.860524	2.68098	0.00918432	0.323934	-4.71733	up-regulated-regulated		CTD-2021J15.1	0.0244321	0.185421	3.08329	0.00218113	0.0972484	-3.52307	up-regulated		ASIC2	0.0225674	0.366913	2.93373	0.00351306	0.0597591	-4.69342	up-regulated
LRIG3	0.0104352	0.190449	2.68085	0.00918754	0.323934	-4.71765	up-regulated-regulated		DNM1P31	0.100246	0.696753	3.08291	0.00218382	0.0972484	-3.5242	up-regulated		KLRB1	0.0154059	0.591919	2.93076	0.00354614	0.0601085	-4.70198	up-regulated
STARD4	0.0175416	0.188867	2.68081	0.00918838	0.323934	-4.71774	up-regulated-regulated		OR7D4	0.0881021	0.430023	3.08263	0.00218581	0.0972484	-3.52503	up-regulated		RP11-554I8.2	0.0846738	0.601001	2.92977	0.00355723	0.0601226	-4.70483	up-regulated
GABRR2	0.0220874	0.705798	2.68028	0.00920151	0.323934	-4.71904	up-regulated-regulated		BTNL8	0.0664335	0.53513	3.08225	0.00218858	0.0972484	-3.5262	up-regulated		PDE1C	0.038852	0.348398	2.92925	0.00356307	0.0601512	-4.70632	up-regulated
P4HB	0.0216949	0.483834	2.67986	0.00921208	0.323934	-4.72008	up-regulated-regulated		CSAG1	0.12468	0.599104	3.082	0.00219035	0.0972484	-3.52694	up-regulated		CST9L	0.0309689	0.338091	2.92854	0.00357113	0.0602229	-4.70838	up-regulated
RNF182	0.0383242	0.299396	2.67959	0.00921872	0.323934	-4.72074	up-regulated-regulated		RP11-210M15.2	0.0601077	0.822683	3.08118	0.00219625	0.0972484	-3.52941	up-regulated		CTC-518B2.9	0.014828	0.744253	2.92843	0.00357235	0.0602229	-4.7087	up-regulated
IL16	0.0278853	0.473129	2.67819	0.00925359	0.323934	-4.72418	up-regulated-regulated		RP4-663N10.1	0.0382215	0.718528	3.08049	0.00220127	0.0972484	-3.53151	up-regulated		NEU2	0.0143368	0.886805	2.92833	0.00357355	0.0602229	-4.709	up-regulated
UNC80	0.0220445	0.406425	2.67757	0.00926915	0.323934	-4.72571	up-regulated-regulated		CTD-2234N14.2	0.133964	0.772866	3.08027	0.00220283	0.0972484	-3.53216	up-regulated		RP11-132N15.1	0.024327	0.34667	2.92624	0.0035972	0.0604805	-4.71502	up-regulated
SMARCD2	0.0166274	0.162365	2.67733	0.00927514	0.323934	-4.7263	up-regulated-regulated		RP11-256I9.3	0.0933325	0.402194	3.08012	0.00220393	0.0972484	-3.53262	up-regulated		IL9RP2	0.0189683	0.804233	2.92599	0.00359999	0.0604805	-4.71573	up-regulated
MEPCE	0.0139237	0.182485	2.67496	0.00933471	0.323934	-4.73213	up-regulated-regulated		TLK1	0.0172473	0.239495	3.07979	0.00220631	0.0972484	-3.53361	up-regulated		HNRNPLP1	0.0104582	0.770748	2.92509	0.00361017	0.0605236	-4.71831	up-regulated
LINC00415	0.0591386	0.828397	2.67482	0.00933816	0.323934	-4.73247	up-regulated-regulated		AC083906.1	0.0661963	0.918976	3.07912	0.00221118	0.0972688	-3.53564	up-regulated		UBBP4	0.0354681	0.745954	2.92459	0.00361598	0.0605766	-4.71977	up-regulated
HIST1H4G	0.0172228	0.93199	2.67441	0.0093486	0.323934	-4.73349	up-regulated-regulated		IGFL1	0.0899717	0.501561	3.0788	0.00221347	0.0972688	-3.53659	up-regulated		CLC	0.0445848	0.592016	2.92397	0.003623	0.0605818	-4.72154	up-regulated
TMEM211	0.0266248	0.510783	2.67403	0.0093581	0.323934	-4.73441	up-regulated-regulated		XAGE3	0.127681	0.660584	3.07731	0.00222437	0.0975996	-3.5411	up-regulated		CLEC1A	0.0334551	0.519663	2.9227	0.00363755	0.060667	-4.7252	up-regulated
REG1B	0.116285	0.743123	2.67392	0.00936089	0.323934	-4.73468	up-regulated-regulated		MICB	0.0234948	0.268015	3.07675	0.00222844	0.0976306	-3.54279	up-regulated		RNU6-819P	0.0344057	0.450272	2.9215	0.00365129	0.0606867	-4.72864	up-regulated
NDUFA4	0.0101289	0.165353	2.67328	0.00937708	0.323934	-4.73626	up-regulated-regulated		BEST2	0.0356262	0.365885	3.07544	0.00223802	0.0979025	-3.54673	up-regulated		LINC00588	0.0452731	0.803594	2.92129	0.00365377	0.0606931	-4.72925	up-regulated
SOCS5P5	0.0189211	0.597301	2.67317	0.00937982	0.323934	-4.73652	up-regulated-regulated		LINC00494	0.0722377	0.274402	3.07394	0.00224907	0.0980585	-3.55125	up-regulated		AC068057.1	0.0408903	0.338469	2.92092	0.00365805	0.0607283	-4.73032	up-regulated
RN7SL526P	0.10103	0.844371	2.67274	0.00939069	0.323934	-4.73758	up-regulated-regulated		KCNB2	0.0816298	0.412968	3.07393	0.00224911	0.0980585	-3.55127	up-regulated		TSPY7P	0.0555115	0.589151	2.91932	0.00367652	0.060862	-4.73492	up-regulated
STATH	0.0249652	0.439679	2.67264	0.00939311	0.323934	-4.73781	up-regulated-regulated		AC009970.1	0.147747	0.763044	3.07358	0.00225173	0.0980585	-3.55234	up-regulated		ABCD1P2	0.026834	0.534813	2.91714	0.00370187	0.0611713	-4.74118	up-regulated
RP11-2C7.1	0.111163	0.804459	2.67212	0.00940647	0.324009	-4.73911	up-regulated-regulated		ASTN1	0.057763	0.323994	3.07296	0.00225629	0.0981095	-3.5542	up-regulated		AC096579.13	0.0553984	0.613321	2.91569	0.00371874	0.0613316	-4.74533	up-regulated
RP11-545J16.1	0.0564371	0.550769	2.67024	0.00945404	0.324522	-4.7437	up-regulated-regulated		FUNDC2P2	0.12336	0.721021	3.07238	0.00226056	0.0981483	-3.55594	up-regulated		RP11-676M6.1	0.0665495	0.617284	2.91374	0.00374161	0.061553	-4.75092	up-regulated
CYP4F35P	0.0517202	0.393083	2.66911	0.00948284	0.324522	-4.74647	up-regulated-regulated		COL6A3	0.0637114	0.631807	3.06877	0.00228751	0.0991128	-3.56683	up-regulated		FUT5	0.043661	0.724948	2.91243	0.00375712	0.0617381	-4.75469	up-regulated
RP11-69L16.4	0.0556659	0.344109	2.66854	0.00949753	0.324522	-4.74788	up-regulated-regulated		LILRB2	0.0589365	0.445004	3.06849	0.00228961	0.0991128	-3.56767	up-regulated		RP11-702C7.1	0.020807	0.856429	2.91028	0.00378259	0.0620997	-4.76085	up-regulated
SUMO3	0.0306552	0.553306	2.66739	0.00952687	0.324522	-4.75069	up-regulated-regulated		RP11-74E22.4	0.0396611	0.309945	3.0677	0.00229549	0.099219	-3.57002	up-regulated		RP11-364B6.1	0.0538261	0.715495	2.9102	0.00378357	0.0620997	-4.76108	up-regulated
PSPHP1	0.0536937	0.908478	2.66717	0.00953248	0.324522	-4.75122	up-regulated-regulated		GDF3	0.050819	0.273025	3.06577	0.00231008	0.0993169	-3.57584	up-regulated		C8orf48	0.0288143	0.230064	2.90985	0.00378771	0.0620997	-4.76208	up-regulated
SLC25A5	0.0106706	0.181823	2.66678	0.00954249	0.324522	-4.75218	up-regulated-regulated		HNRNPCL1	0.0821849	0.554442	3.06566	0.00231084	0.0993169	-3.57614	up-regulated		CTD-2342I9.1	0.042405	0.528369	2.90967	0.00378983	0.0620997	-4.76259	up-regulated
MIR515-2	0.0748232	0.589746	2.66648	0.00955037	0.324522	-4.75293	up-regulated-regulated		OR10G4	0.0744146	0.294255	3.06546	0.00231237	0.0993169	-3.57675	up-regulated		GRM6	0.027148	0.537857	2.90849	0.00380391	0.0621899	-4.76597	up-regulated
IMP4	0.0419955	0.803321	2.66524	0.0095822	0.324522	-4.75596	up-regulated-regulated		AHSA1	0.0291266	0.563284	3.06515	0.0023147	0.0993169	-3.57768	up-regulated		HSD3B2	0.0137242	0.615437	2.90709	0.00382068	0.0623751	-4.76998	up-regulated
BMS1P4	0.02489	0.278328	2.66398	0.0096147	0.324522	-4.75904	up-regulated-regulated		CD33	0.0448889	0.442981	3.06442	0.00232024	0.0993169	-3.57987	up-regulated		AMPH	0.0375591	0.410149	2.90654	0.00382731	0.0623966	-4.77156	up-regulated
AC011453.3	0.0436512	0.315888	2.66394	0.00961573	0.324522	-4.75914	up-regulated-regulated		DPP10	0.0620268	0.346952	3.064	0.00232346	0.0993169	-3.58115	up-regulated		AC021660.1	0.0318707	0.252324	2.90106	0.00389359	0.0631576	-4.78721	up-regulated
FAM86B1	0.0188594	0.188749	2.66346	0.00962811	0.324522	-4.76031	up-regulated-regulated		CTD-2318H23.1	0.145279	0.763538	3.06356	0.00232679	0.0993169	-3.58246	up-regulated		RP11-296E3.2	0.0363723	0.0976186	2.9003	0.00390287	0.0632374	-4.78937	up-regulated
JOSD1	0.0216913	0.192509	2.66302	0.00963944	0.324522	-4.76138	up-regulated-regulated		CSMD3	0.0522838	0.281269	3.06315	0.00232991	0.0993169	-3.58369	up-regulated		VWC2	0.0381458	0.346438	2.89881	0.00392119	0.0633893	-4.79364	up-regulated
OR10H5	0.0792412	0.800561	2.66284	0.00964414	0.324522	-4.76183	up-regulated-regulated		C10orf71	0.0849975	0.511088	3.0631	0.0023303	0.0993169	-3.58384	up-regulated		PABPC1P8	0.0631772	0.630243	2.89865	0.00392317	0.0633893	-4.7941	up-regulated
MCTP2	0.0267165	0.516431	2.66213	0.00966273	0.324531	-4.76358	up-regulated-regulated		SERPINA10	0.0769272	0.511657	3.06041	0.00235085	0.0996696	-3.59191	up-regulated		ABCD1P4	0.0274603	0.358626	2.89834	0.00392693	0.0633931	-4.79497	up-regulated
CTB-131K11.1	0.0141327	0.24201	2.66155	0.00967779	0.324531	-4.765	up-regulated-regulated		RP11-320N7.1	0.156436	0.590668	3.06031	0.00235167	0.0996696	-3.59223	up-regulated		TRBV2	0.0701601	0.557191	2.89777	0.00393393	0.0634478	-4.7966	up-regulated
UQCRH	0.0545092	0.789838	2.6615	0.00967897	0.324531	-4.76511	up-regulated-regulated		AC009237.4	0.0676556	0.851812	3.06023	0.00235226	0.0996696	-3.59246	up-regulated		PRR20B	0.0171367	0.243326	2.89755	0.00393662	0.0634478	-4.79722	up-regulated
SLC30A1	0.0138766	0.128027	2.66024	0.00971187	0.325174	-4.7682	up-regulated-regulated		RFKP1	0.129027	0.660175	3.06	0.00235402	0.0996696	-3.59315	up-regulated		RP11-173D3.3	0.0313179	0.515182	2.89696	0.00394392	0.0634559	-4.79891	up-regulated
FCRLA	0.0556544	0.310346	2.65807	0.00976853	0.325875	-4.77349	up-regulated-regulated		LEUTX	0.0547227	0.481132	3.05933	0.00235916	0.0997417	-3.59515	up-regulated		DENND5B-AS1	0.0382439	0.716428	2.89689	0.0039448	0.0634559	-4.79911	up-regulated
RPL6	0.015175	0.221333	2.65679	0.00980221	0.325875	-4.77662	up-regulated-regulated		AL133493.2	0.0606116	0.526399	3.05854	0.0023653	0.0998555	-3.59753	up-regulated		AC051649.1	0.0345641	0.557648	2.89644	0.00395033	0.0635097	-4.80039	up-regulated
CUZD1	0.0571702	0.76684	2.65673	0.00980367	0.325875	-4.77676	up-regulated-regulated		OR10AD1	0.0416145	0.539304	3.05729	0.00237496	0.100118	-3.60128	up-regulated		RP11-706C16.8	0.0255859	0.527479	2.89588	0.00395734	0.0635871	-4.802	up-regulated
SOD1	0.0729737	0.838333	2.65426	0.00986898	0.326746	-4.7828	up-regulated-regulated		OR14A16	0.0731976	0.548335	3.05678	0.00237888	0.100137	-3.60279	up-regulated		MMP17	0.0109379	0.40215	2.89337	0.00398852	0.0639112	-4.80915	up-regulated
PTPN14	0.0199434	0.532023	2.65188	0.00993211	0.327678	-4.7886	up-regulated-regulated		PSG1	0.047511	0.259599	3.05452	0.00239649	0.100458	-3.60956	up-regulated		FTH1P14	0.0570975	0.794456	2.89243	0.0040002	0.0639996	-4.81181	up-regulated
LDHC	0.0943824	0.512023	2.65077	0.00996191	0.327678	-4.79132	up-regulated-regulated		CTD-2552K11.2	0.0180063	0.638642	3.05398	0.00240075	0.100458	-3.61119	up-regulated		IGHV3-74	0.0357734	0.44435	2.89167	0.00400973	0.064049	-4.81398	up-regulated
BPIFA1	0.0610128	0.578349	2.65023	0.00997618	0.327678	-4.79262	up-regulated-regulated		CTB-83J4.1	0.0828743	0.391187	3.05372	0.00240278	0.100458	-3.61197	up-regulated		TUBA3C	0.0345771	0.516914	2.8908	0.00402064	0.0641423	-4.81645	up-regulated
RPL37	0.014727	0.172517	2.65008	0.00998027	0.327678	-4.793	up-regulated-regulated		PABPC1P8	0.135204	0.634205	3.05342	0.00240512	0.100458	-3.61286	up-regulated		RP3-400B16.2	0.0276662	0.937785	2.89004	0.00403021	0.0641755	-4.81862	up-regulated
DPRX	0.0369376	0.792544	2.6498	0.00998773	0.327678	-4.79368	up-regulated-regulated		EIF4EP5	0.143505	0.789028	3.05321	0.00240677	0.100458	-3.61349	up-regulated		LINC01085	0.0330684	0.318661	2.88974	0.00403407	0.06418	-4.81949	up-regulated
AC091878.1	0.0186674	0.348718	2.64939	0.00999879	0.327678	-4.79468	up-regulated-regulated		GRIN2A	0.0680535	0.351289	3.05314	0.00240728	0.100458	-3.61369	up-regulated		ZCCHC5	0.0682375	0.685769	2.88896	0.00404382	0.0642294	-4.82169	up-regulated
ADM2	0.0418731	0.180813	2.64866	0.0100183	0.327945	-4.79645	up-regulated-regulated		RP1-257I9.2	0.15306	0.799823	3.05199	0.00241636	0.100692	-3.61714	up-regulated		KRT16P4	0.0141586	0.854434	2.88838	0.00405122	0.0642767	-4.82335	up-regulated
LINC00463	0.0746126	0.553629	2.64628	0.0100822	0.329221	-4.80224	up-regulated-regulated		NEUROD4	0.0509403	0.318678	3.05115	0.00242293	0.100697	-3.61964	up-regulated		ESRRAP1	0.0228685	0.766965	2.88781	0.00405847	0.0642861	-4.82498	up-regulated
FLJ16779	0.0372899	0.165304	2.64573	0.0100973	0.329221	-4.8036	up-regulated-regulated		KCNH1	0.0324073	0.449832	3.05056	0.00242767	0.100697	-3.62143	up-regulated		RP4-647J21.1	0.0181032	0.422378	2.88727	0.0040653	0.0643241	-4.82651	up-regulated
PADI1	0.0291061	0.35437	2.64546	0.0101046	0.329221	-4.80425	up-regulated-regulated		SCN5A	0.0627474	0.448088	3.05042	0.00242875	0.100697	-3.62183	up-regulated		CTD-2325P2.2	0.0247402	0.748835	2.88518	0.00409193	0.0645788	-4.83245	up-regulated
YWHAG	0.0111887	0.406209	2.64453	0.0101297	0.329221	-4.80651	up-regulated-regulated		CNN2P3	0.0833178	0.866176	3.05021	0.00243036	0.100697	-3.62245	up-regulated		SCN4A	0.0158958	0.786459	2.88489	0.0040956	0.064592	-4.83327	up-regulated
MIR154	0.144225	0.538886	2.64358	0.0101555	0.329221	-4.80882	up-regulated-regulated		LINC00332	0.101816	0.825858	3.0497	0.00243442	0.100721	-3.62398	up-regulated		AOAH	0.0437878	0.549848	2.88452	0.00410025	0.0645969	-4.8343	up-regulated
NCOA2	0.0218057	0.455129	2.64344	0.0101594	0.329221	-4.80917	up-regulated-regulated		MRGPRX1	0.109529	0.545475	3.04851	0.00244387	0.100968	-3.62753	up-regulated		CYP2B6	0.0380228	0.685308	2.88452	0.00410036	0.0645969	-4.83433	up-regulated
C14orf2	0.019262	0.440439	2.64183	0.0102031	0.32972	-4.81307	up-regulated-regulated		SLURP1	0.0503668	0.640263	3.04796	0.00244825	0.101005	-3.62917	up-regulated		CDH4	0.0340962	0.548252	2.8834	0.00411468	0.0647833	-4.8375	up-regulated
FOXRED2	0.0135695	0.460627	2.64025	0.0102464	0.32972	-4.81692	up-regulated-regulated		RP11-813I20.2	0.0186834	0.443777	3.04664	0.00245882	0.10123	-3.63313	up-regulated		XKR4	0.0392287	0.482204	2.88261	0.00412482	0.0648062	-4.83974	up-regulated
NAGPA	0.0114562	0.691821	2.64012	0.0102498	0.32972	-4.81722	up-regulated-regulated		ATP5A1P3	0.0388021	0.790452	3.04569	0.00246644	0.10123	-3.63597	up-regulated		DRICH1	0.0138753	0.662176	2.88001	0.00415843	0.065193	-4.84713	up-regulated
MXRA8	0.0403375	0.37287	2.63996	0.0102544	0.32972	-4.81763	up-regulated-regulated		LCE1A	0.139118	0.523618	3.04505	0.00247153	0.10123	-3.63786	up-regulated		AC003973.1	0.051366	0.667127	2.87265	0.00425479	0.0660608	-4.86797	up-regulated
SHMT1	0.0130367	0.208992	2.63646	0.0103507	0.331173	-4.82612	up-regulated-regulated		FGF23	0.101729	0.586717	3.04443	0.00247655	0.10123	-3.63972	up-regulated		CCDC108	0.0157955	0.283174	2.87052	0.00428305	0.0662012	-4.87399	up-regulated
FOPNL	0.0117477	0.242752	2.63624	0.0103566	0.331173	-4.82665	up-regulated-regulated		ZBTB8OSP2	0.109346	0.715179	3.04417	0.00247862	0.10123	-3.64049	up-regulated		AC005609.18	0.0413718	0.636357	2.87013	0.00428814	0.0662012	-4.87507	up-regulated
SLC25A3	0.010141	0.228078	2.63373	0.0104264	0.331352	-4.83274	up-regulated-regulated		EIF3E	0.0156123	0.0925242	3.04376	0.00248193	0.10123	-3.64171	up-regulated		LCE3A	0.0392645	0.353224	2.86986	0.00429182	0.0662104	-4.87585	up-regulated
PSMG2	0.0227356	0.183699	2.63348	0.0104334	0.331352	-4.83335	up-regulated-regulated		LCT	0.0338934	0.811409	3.04371	0.00248232	0.10123	-3.64186	up-regulated		KRT81	0.0110642	0.59517	2.86724	0.00432686	0.0663163	-4.88325	up-regulated
AF238378.7	0.0594554	0.792269	2.63285	0.0104507	0.331352	-4.83486	up-regulated-regulated		OR1B1	0.117492	0.617577	3.0435	0.00248404	0.10123	-3.64249	up-regulated		WNT7A	0.0239141	0.405703	2.86592	0.00434465	0.0663914	-4.88698	up-regulated
FAM160B1	0.012268	0.29658	2.63223	0.0104681	0.331352	-4.83637	up-regulated-regulated		IFITM5	0.0519723	0.40595	3.04292	0.00248872	0.10123	-3.64422	up-regulated		RP4-775C13.1	0.0455884	0.614616	2.86535	0.00435232	0.0663914	-4.88858	up-regulated
IMMT	0.0127904	0.244102	2.6322	0.010469	0.331352	-4.83645	up-regulated-regulated		ADRA1B	0.0313103	0.289804	3.04264	0.00249098	0.10123	-3.64505	up-regulated		CTD-2132N18.2	0.0260416	0.841575	2.86418	0.00436814	0.0665734	-4.89188	up-regulated
MIR623	0.0705674	0.616949	2.63206	0.0104729	0.331352	-4.83679	up-regulated-regulated		ARL2-SNX15	0.0152162	0.387788	3.04249	0.00249222	0.10123	-3.64551	up-regulated		PSG2	0.0242503	0.693539	2.8608	0.00441413	0.0670277	-4.9014	up-regulated
POLR2J	0.0271354	0.422696	2.62987	0.0105343	0.331352	-4.8421	up-regulated-regulated		CEACAM4	0.0802038	0.389085	3.04164	0.00249916	0.10123	-3.64806	up-regulated		GRIK3	0.019901	0.329529	2.85814	0.00445069	0.0674039	-4.9089	up-regulated
HSP90B1	0.0112876	0.140958	2.62948	0.0105451	0.331352	-4.84303	up-regulated-regulated		PRSS42	0.0431536	0.71788	3.04119	0.00250278	0.10123	-3.64939	up-regulated		FAM209A	0.0167384	0.731163	2.85698	0.0044667	0.0674606	-4.91216	up-regulated
HNRNPC	0.0131937	0.242173	2.62868	0.0105678	0.331352	-4.84498	up-regulated-regulated		RP1-90G24.10	0.039314	0.469563	3.04048	0.00250858	0.10123	-3.65151	up-regulated		EMR3	0.0220934	0.215502	2.85426	0.0045044	0.0676897	-4.9198	up-regulated
RP11-56M3.1	0.0654197	0.834713	2.62848	0.0105735	0.331352	-4.84547	up-regulated-regulated		HIST1H4G	0.0188103	0.935998	3.04036	0.00250955	0.10123	-3.65186	up-regulated		KIR3DX1	0.0384092	0.410803	2.85253	0.00452859	0.0679014	-4.92467	up-regulated
RPL31	0.0299302	0.443118	2.62833	0.0105775	0.331352	-4.84581	up-regulated-regulated		HNRNPCL2	0.109076	0.837738	3.03918	0.00251915	0.101476	-3.65537	up-regulated		RP5-1121A15.3	0.0171751	0.355191	2.85242	0.0045302	0.0679014	-4.92499	up-regulated
ATP6V0A2	0.0153553	0.213288	2.62776	0.0105936	0.331352	-4.84719	up-regulated-regulated		CTD-2544M6.1	0.0583524	0.295667	3.03813	0.00252782	0.101512	-3.65852	up-regulated		SAPCD2P1	0.0424711	0.616009	2.85073	0.00455395	0.0681518	-4.92974	up-regulated
IFRD1	0.0171244	0.337086	2.62714	0.0106112	0.331352	-4.8487	up-regulated-regulated		KCNK18	0.0958546	0.723243	3.03785	0.00253007	0.101512	-3.65934	up-regulated		RP11-65D24.2	0.0389506	0.640032	2.85028	0.00456029	0.0682114	-4.93101	up-regulated
TAS1R2	0.0473562	0.826301	2.62697	0.0106159	0.331352	-4.8491	up-regulated-regulated		AL591704.5	0.0769618	0.543576	3.03747	0.00253322	0.101512	-3.66048	up-regulated		LINC01056	0.0399699	0.505308	2.8501	0.00456273	0.0682129	-4.93149	up-regulated
NMU	0.0350433	0.18133	2.6267	0.0106235	0.331352	-4.84976	up-regulated-regulated		PGBD5	0.032194	0.62306	3.03737	0.00253403	0.101512	-3.66077	up-regulated		LINC00273	0.0284963	0.415026	2.84683	0.00460909	0.0686935	-4.94068	up-regulated
HERC2P3	0.0395449	0.541468	2.62665	0.010625	0.331352	-4.84988	up-regulated-regulated		DCAF4L1	0.0185854	0.589645	3.03662	0.00254022	0.101619	-3.66301	up-regulated		AC139256.1	0.0161411	0.84328	2.84604	0.00462028	0.0687895	-4.94288	up-regulated
CECR7	0.0302056	0.449467	2.62558	0.0106555	0.331945	-4.85248	up-regulated-regulated		NLRP10	0.121587	0.48712	3.03588	0.00254634	0.10171	-3.66521	up-regulated		FAM90A1	0.0387282	0.788565	2.84413	0.00464767	0.0690909	-4.94825	up-regulated
MRPL9	0.0129955	0.20292	2.62198	0.0107581	0.333278	-4.86118	up-regulated-regulated		CCNJP1	0.096075	0.303394	3.03507	0.00255302	0.10171	-3.66762	up-regulated		RP11-343J3.5	0.0650131	0.814123	2.8439	0.00465092	0.0691039	-4.94888	up-regulated
KMT2D	0.0118221	0.457399	2.62168	0.0107667	0.333278	-4.86191	up-regulated-regulated		GPX6	0.0233776	0.259892	3.03316	0.00256888	0.102202	-3.6733	up-regulated		PRDM16	0.0314608	0.550706	2.84366	0.00465434	0.0691192	-4.94955	up-regulated
ATP5G1P1	0.0489291	0.292167	2.62062	0.0107972	0.333278	-4.86447	up-regulated-regulated		PRKCB	0.0488238	0.279963	3.03242	0.00257502	0.10223	-3.67549	up-regulated		APBB1IP	0.0271839	0.228734	2.84334	0.00465902	0.0691291	-4.95046	up-regulated
ADAL	0.0133856	0.186436	2.62053	0.0107996	0.333278	-4.86468	up-regulated-regulated		LINC00906	0.167847	0.676985	3.03185	0.00257981	0.10223	-3.67719	up-regulated		RP11-779O18.2	0.0143934	0.922843	2.84315	0.0046617	0.0691291	-4.95098	up-regulated
SLC22A9	0.0386086	0.848815	2.61964	0.0108252	0.333278	-4.86683	up-regulated-regulated		OR6T1	0.101041	0.400023	3.0315	0.00258271	0.10223	-3.67822	up-regulated		DPP10	0.0280552	0.345249	2.83957	0.0047135	0.0694995	-4.96102	up-regulated
MMAB	0.0118449	0.111035	2.6194	0.0108323	0.333278	-4.86742	up-regulated-regulated		TMEM225	0.104226	0.432341	3.03122	0.00258508	0.10223	-3.67906	up-regulated		DEFB107A	0.0776988	0.613153	2.8369	0.00475239	0.0697979	-4.96848	up-regulated
SNHG17	0.0350956	0.393448	2.6186	0.0108552	0.333278	-4.86933	up-regulated-regulated		RP11-285M22.1	0.106578	0.67386	3.03094	0.00258742	0.10223	-3.67989	up-regulated		GLRXP3	0.0382242	0.539174	2.83686	0.00475298	0.0697979	-4.96859	up-regulated
FUT10	0.0117956	0.16424	2.61859	0.0108557	0.333278	-4.86938	up-regulated-regulated		REXO1L3P	0.131818	0.85189	3.03054	0.00259074	0.10223	-3.68107	up-regulated		PCGF7P	0.0515873	0.491713	2.83512	0.00477852	0.0700665	-4.97346	up-regulated
AC067961.1	0.096149	0.418716	2.61791	0.0108752	0.333278	-4.87101	up-regulated-regulated		AC132217.4	0.0683211	0.747992	3.03008	0.00259466	0.102246	-3.68245	up-regulated		HMGN1P36	0.0183475	0.370803	2.83412	0.00479314	0.0701184	-4.97623	up-regulated
PADI2	0.0192585	0.237767	2.61776	0.0108796	0.333278	-4.87138	up-regulated-regulated		GPR1	0.0295963	0.275173	3.0293	0.00260122	0.102254	-3.68477	up-regulated		TSPY1	0.0543602	0.591815	2.83405	0.00479415	0.0701184	-4.97642	up-regulated
AC098591.1	0.0403738	0.50285	2.61756	0.0108854	0.333278	-4.87186	up-regulated-regulated		BEND3P3	0.0295676	0.709763	3.02891	0.00260446	0.102254	-3.68591	up-regulated		LETM1P2	0.043459	0.651766	2.83339	0.0048039	0.0701901	-4.97827	up-regulated
NAAA	0.0132083	0.298383	2.61668	0.0109109	0.333278	-4.87398	up-regulated-regulated		SSX5	0.157554	0.624193	3.0288	0.00260543	0.102254	-3.68625	up-regulated		RP11-24P24.1	0.0727373	0.783089	2.83312	0.00480797	0.0702042	-4.97903	up-regulated
CSNK1A1P1	0.0517116	0.66664	2.61608	0.0109281	0.333278	-4.87541	up-regulated-regulated		ZNF30-AS1	0.0635433	0.878114	3.02821	0.00261044	0.102312	-3.68801	up-regulated		ZNF560	0.0440954	0.835554	2.83219	0.00482169	0.0702731	-4.98162	up-regulated
EEF1D	0.016712	0.471348	2.61486	0.0109636	0.333878	-4.87835	up-regulated-regulated		OR7E83P	0.071197	0.659046	3.02685	0.0026219	0.10256	-3.69203	up-regulated		RP11-253E3.1	0.0256645	0.796831	2.83073	0.00484342	0.0705053	-4.9857	up-regulated
RP4-800G7.1	0.0980164	0.926779	2.61462	0.0109708	0.333878	-4.87895	up-regulated-regulated		FAM207BP	0.136321	0.697217	3.02599	0.00262926	0.10256	-3.6946	up-regulated		RP13-507P19.1	0.0342073	0.7433	2.82652	0.00490644	0.070994	-4.99743	up-regulated
FBRS	0.012349	0.339092	2.61351	0.0110032	0.334236	-4.88163	up-regulated-regulated		TSPY11P	0.0747979	0.631092	3.02593	0.00262975	0.10256	-3.69477	up-regulated		ADAMTS20	0.0302662	0.293588	2.82512	0.00492762	0.0711732	-5.00134	up-regulated
ATP6V1G2-DDX39B	0.0136838	0.255996	2.61266	0.0110281	0.334236	-4.88367	up-regulated-regulated		KRT84	0.0545307	0.541683	3.02579	0.00263093	0.10256	-3.69518	up-regulated		LINC00861	0.0586437	0.426498	2.82481	0.00493229	0.0712052	-5.0022	up-regulated
PHB2P1	0.0671912	0.408518	2.61264	0.0110287	0.334236	-4.88372	up-regulated-regulated		MIR519E	0.0600788	0.395426	3.02482	0.00263924	0.102746	-3.69807	up-regulated		ACCSL	0.0196561	0.503671	2.82414	0.00494231	0.0713144	-5.00404	up-regulated
RPS11	0.0200128	0.138563	2.61184	0.0110521	0.334285	-4.88565	up-regulated-regulated		PMPCA	0.0206808	0.484409	3.0221	0.00266257	0.103262	-3.70614	up-regulated		HSD3BP2	0.0244716	0.843106	2.81991	0.00500682	0.0720302	-5.0158	up-regulated
TSSC4	0.0171191	0.251433	2.61103	0.0110757	0.334285	-4.88758	up-regulated-regulated		OR10H5	0.0753295	0.808106	3.02207	0.00266278	0.103262	-3.70621	up-regulated		ZC3H11B	0.0292021	0.771943	2.81908	0.0050196	0.0721424	-5.01811	up-regulated
SLC35F4	0.0548651	0.472042	2.61101	0.0110764	0.334285	-4.88764	up-regulated-regulated		RP13-150K15.1	0.140984	0.763943	3.02202	0.00266318	0.103262	-3.70635	up-regulated		SMCHD1	0.0266365	0.23575	2.81757	0.00504288	0.0722979	-5.02231	up-regulated
MRPL51	0.0101946	0.111596	2.61022	0.0110995	0.334499	-4.88953	up-regulated-regulated		MIR518F	0.0249293	0.137353	3.02067	0.00267483	0.103347	-3.71035	up-regulated		TMEM198	0.0348925	0.666452	2.81607	0.00506611	0.0724591	-5.02648	up-regulated
HYKK	0.0101504	0.0576046	2.60999	0.0111065	0.334499	-4.8901	up-regulated-regulated		FCRLA	0.0557471	0.318406	3.02042	0.00267702	0.103347	-3.7111	up-regulated		TRIML2	0.027972	0.296184	2.81604	0.00506662	0.0724591	-5.02657	up-regulated
PPP2R2B	0.0542953	0.336134	2.60925	0.0111282	0.334805	-4.89187	up-regulated-regulated		AC007131.1	0.109226	0.511521	3.0203	0.00267802	0.103347	-3.71144	up-regulated		RP11-383H13.1	0.0293806	0.289714	2.81575	0.00507104	0.0724866	-5.02736	up-regulated
ATIC	0.0378363	0.127477	2.60812	0.0111617	0.335256	-4.8946	up-regulated-regulated		NLRP11	0.0511158	0.519	3.02012	0.00267962	0.103347	-3.71199	up-regulated		PGAM1P12	0.0465486	0.632779	2.81358	0.0051048	0.0727898	-5.03338	up-regulated
AC005017.2	0.0581688	0.435346	2.60796	0.0111663	0.335256	-4.89497	up-regulated-regulated		LCE2D	0.0770366	0.315768	3.01961	0.00268403	0.10338	-3.7135	up-regulated		RP11-160N1.8	0.0339318	0.362025	2.81158	0.0051361	0.0730874	-5.03892	up-regulated
ACRC	0.0186801	0.757321	2.60662	0.0112061	0.335529	-4.8982	up-regulated-regulated		CLC	0.0945356	0.594837	3.01656	0.00271062	0.104265	-3.72253	up-regulated		BIRC8	0.021187	0.476657	2.81078	0.00514873	0.0731644	-5.04114	up-regulated
SMARCE1P6	0.051024	0.845889	2.60649	0.0112101	0.335529	-4.89852	up-regulated-regulated		MIR216A	0.0461921	0.345663	3.01569	0.00271825	0.104313	-3.72511	up-regulated		RP11-483G21.3	0.0109895	0.881951	2.80675	0.00521249	0.0737094	-5.0523	up-regulated
NAPSB	0.0434367	0.364423	2.60457	0.0112673	0.336227	-4.90314	up-regulated-regulated		RERGL	0.139383	0.702389	3.0156	0.00271906	0.104313	-3.72538	up-regulated		OR3A3	0.050309	0.710078	2.80638	0.00521841	0.0737362	-5.05333	up-regulated
ELOVL4	0.0227283	0.242377	2.60362	0.0112955	0.336227	-4.9054	up-regulated-regulated		MAGI3	0.0113779	0.193076	3.01427	0.0027307	0.104349	-3.72929	up-regulated		RP11-818F20.5	0.0101284	0.568369	2.80631	0.00521948	0.0737362	-5.05351	up-regulated
RP11-173P15.7	0.0597036	0.807924	2.60337	0.0113031	0.336227	-4.90601	up-regulated-regulated		RP11-38O14.5	0.0825228	0.68791	3.01415	0.00273177	0.104349	-3.72965	up-regulated		SPON2	0.0262379	0.41025	2.80576	0.00522818	0.073785	-5.05502	up-regulated
CTB-191K22.6	0.0866788	0.440869	2.60209	0.0113415	0.336227	-4.90909	up-regulated-regulated		A2M	0.103969	0.619662	3.01397	0.00273335	0.104349	-3.73018	up-regulated		CTD-2382H12.1	0.03599	0.595318	2.80561	0.00523056	0.073785	-5.05544	up-regulated
WSB1	0.0480442	0.706101	2.60048	0.0113899	0.336227	-4.91295	up-regulated-regulated		KB-1440D3.13	0.0941377	0.819233	3.01385	0.00273438	0.104349	-3.73053	up-regulated		MIR147A	0.0225244	0.430393	2.80524	0.00523652	0.0737981	-5.05647	up-regulated
MLLT4	0.0158144	0.51259	2.60033	0.0113943	0.336227	-4.9133	up-regulated-regulated		PRG3	0.0428513	0.342885	3.0114	0.00275609	0.104755	-3.73777	up-regulated		RP11-240G22.1	0.0300053	0.885554	2.8046	0.00524678	0.0738442	-5.05824	up-regulated
MEIS3	0.0653067	0.34819	2.60004	0.0114032	0.336227	-4.914	up-regulated-regulated		BAGE2	0.0135008	0.068092	3.01098	0.00275981	0.104755	-3.73901	up-regulated		RP4-610C12.3	0.0415972	0.668211	2.80378	0.00525998	0.0738442	-5.06052	up-regulated
RP11-178H8.7	0.0560839	0.802671	2.59792	0.0114672	0.336227	-4.91908	up-regulated-regulated		AC073987.1	0.104683	0.483146	3.01048	0.00276433	0.104755	-3.74051	up-regulated		SAMM50	0.015927	0.667756	2.80356	0.00526346	0.0738442	-5.06112	up-regulated
RP11-211G3.3	0.0311847	0.51307	2.59722	0.0114885	0.336227	-4.92076	up-regulated-regulated		OR6L1P	0.0910038	0.754084	3.0099	0.0027695	0.104755	-3.74222	up-regulated		TBC1D3P1-DHX40P1	0.0310108	0.702874	2.80353	0.00526391	0.0738442	-5.0612	up-regulated
SLC25A44	0.0112206	0.241391	2.59707	0.0114933	0.336227	-4.92114	up-regulated-regulated		RP11-196D18.2	0.14383	0.76949	3.00942	0.00277374	0.104755	-3.74362	up-regulated		MAGEA4	0.0312801	0.790377	2.80328	0.00526794	0.0738454	-5.06189	up-regulated
MMD	0.0210517	0.204112	2.59586	0.0115301	0.336227	-4.92403	up-regulated-regulated		TRPC4	0.030323	0.189419	3.00894	0.00277802	0.104755	-3.74503	up-regulated		ARSF	0.0227165	0.275845	2.80205	0.00528765	0.0740501	-5.06527	up-regulated
HLTF	0.0193047	0.575413	2.59527	0.0115482	0.336227	-4.92545	up-regulated-regulated		OR2Z1	0.0445837	0.181448	3.00888	0.00277861	0.104755	-3.74523	up-regulated		RP11-267D19.2	0.044452	0.692659	2.79855	0.00534448	0.0746657	-5.07496	up-regulated
TRUB1	0.0133973	0.074723	2.59499	0.0115566	0.336227	-4.92611	up-regulated-regulated		ATP2B2	0.030406	0.462639	3.00879	0.00277943	0.104755	-3.7455	up-regulated		SSX1	0.0363781	0.617347	2.79491	0.00540399	0.0751173	-5.08499	up-regulated
MIR17HG	0.0143685	0.245974	2.5943	0.0115778	0.336227	-4.92777	up-regulated-regulated		FPGT-TNNI3K	0.107185	0.47269	3.00808	0.00278579	0.104755	-3.74759	up-regulated		RP11-78A18.2	0.0335449	0.736506	2.79483	0.0054053	0.0751173	-5.0852	up-regulated
ADI1	0.0304839	0.665493	2.59415	0.0115824	0.336227	-4.92813	up-regulated-regulated		CTB-113P19.4	0.0255202	0.355757	3.00772	0.00278899	0.104755	-3.74864	up-regulated		COTL1P1	0.0261466	0.810941	2.79457	0.00540951	0.0751399	-5.08591	up-regulated
CDC20P1	0.0218377	0.898523	2.5938	0.0115931	0.336227	-4.92897	up-regulated-regulated		DMRTC1B	0.0581586	0.868443	3.00717	0.00279397	0.104755	-3.75027	up-regulated		CTD-2267D19.3	0.0174441	0.420229	2.79416	0.00541629	0.075198	-5.08704	up-regulated
TRIM21	0.0435258	0.280663	2.59376	0.0115941	0.336227	-4.92905	up-regulated-regulated		AC007743.1	0.0281913	0.190866	3.00689	0.00279643	0.104755	-3.75108	up-regulated		MSNP1	0.0636917	0.607916	2.79265	0.00544116	0.0754067	-5.09119	up-regulated
RP11-767C1.1	0.0297655	0.68598	2.59338	0.0116058	0.336227	-4.92996	up-regulated-regulated		HLA-DOB	0.0407449	0.459702	3.00673	0.00279786	0.104755	-3.75155	up-regulated		OR5M8	0.0334853	0.760097	2.7924	0.00544531	0.0754067	-5.09188	up-regulated
ABT1	0.0432991	0.329747	2.59316	0.0116128	0.336227	-4.9305	up-regulated-regulated		PMS2CL	0.0158315	0.324314	3.00648	0.00280016	0.104755	-3.7523	up-regulated		RP11-469N6.1	0.0249241	0.549475	2.7924	0.00544539	0.0754067	-5.0919	up-regulated
RP11-32B5.8	0.0927955	0.753285	2.58956	0.0117237	0.337324	-4.93912	up-regulated-regulated		RP11-702C7.1	0.0456585	0.857703	3.00586	0.00280576	0.104755	-3.75413	up-regulated		OVCH1-AS1	0.0144389	0.495922	2.7912	0.00546523	0.0756241	-5.09519	up-regulated
TNNT1	0.0364014	0.204312	2.58912	0.0117371	0.337376	-4.94015	up-regulated-regulated		CMKLR1	0.0752232	0.306283	3.00523	0.0028114	0.104755	-3.75597	up-regulated		CCDC26	0.0324042	0.417383	2.78877	0.00550578	0.0758052	-5.10188	up-regulated
ADK	0.0106971	0.159277	2.58773	0.0117803	0.337388	-4.94348	up-regulated-regulated		RP11-168K9.2	0.11675	0.616981	3.00488	0.00281457	0.104755	-3.757	up-regulated		CYP11B1	0.0422821	0.553296	2.78869	0.00550707	0.0758052	-5.10209	up-regulated
KLHL32	0.0152741	0.258303	2.58761	0.011784	0.337388	-4.94376	up-regulated-regulated		RP13-507P19.2	0.111819	0.399968	3.00476	0.00281571	0.104755	-3.75737	up-regulated		GRIFIN	0.0616187	0.671221	2.78758	0.0055256	0.0759882	-5.10514	up-regulated
CDR2L	0.0105282	0.461927	2.58595	0.0118359	0.337901	-4.94774	up-regulated-regulated		NUTF2P4	0.0498668	0.558667	3.0039	0.00282353	0.104755	-3.75991	up-regulated		LRRC37A11P	0.0126583	0.675484	2.78609	0.00555077	0.076262	-5.10925	up-regulated
DNAJB6	0.0141206	0.589521	2.58543	0.0118521	0.337901	-4.94898	up-regulated-regulated		TMEM33	0.0141049	0.161304	3.00388	0.00282366	0.104755	-3.75996	up-regulated		RP11-955H22.1	0.0248426	0.356198	2.78581	0.00555533	0.0762884	-5.10999	up-regulated
KRTAP5-4	0.0376978	0.123244	2.58494	0.0118673	0.337901	-4.95014	up-regulated-regulated		AC103563.7	0.0190375	0.249836	3.00373	0.002825	0.104755	-3.76039	up-regulated		AC091849.1	0.0137186	0.830789	2.7856	0.0055589	0.0763014	-5.11057	up-regulated
RP11-125M16.1	0.0516509	0.876612	2.58489	0.0118689	0.337901	-4.95026	up-regulated-regulated		RASGRP3	0.0220652	0.329935	3.00368	0.00282551	0.104755	-3.76056	up-regulated		ZIM2	0.0306249	0.432078	2.78478	0.00557282	0.0763621	-5.11284	up-regulated
RP11-143J24.1	0.0366726	0.760634	2.58416	0.0118919	0.338139	-4.95202	up-regulated-regulated		TNRC18P3	0.0862264	0.68134	3.00188	0.00284191	0.104755	-3.76585	up-regulated		TRIML1	0.0503688	0.612975	2.78294	0.005604	0.0764505	-5.11789	up-regulated
CDK2AP2	0.0109272	0.0830604	2.58236	0.0119485	0.3384	-4.95631	up-regulated-regulated		SMG7-AS1	0.0355355	0.281377	3.00182	0.00284243	0.104755	-3.76602	up-regulated		LINC00943	0.0219739	0.217266	2.77931	0.00566593	0.076933	-5.12783	up-regulated
ART1	0.0253926	0.725368	2.58205	0.011958	0.3384	-4.95704	up-regulated-regulated		AC087793.1	0.107354	0.768005	3.00159	0.00284459	0.104755	-3.76672	up-regulated		DEFA5	0.0261607	0.497214	2.77764	0.00569458	0.0772137	-5.13239	up-regulated
GPX1	0.0158121	0.147112	2.58192	0.0119623	0.3384	-4.95736	up-regulated-regulated		LYZL6	0.0544612	0.627921	3.00155	0.00284494	0.104755	-3.76683	up-regulated		RP11-290O12.2	0.0633173	0.690401	2.77689	0.00570761	0.0772819	-5.13446	up-regulated
PPP6R2P1	0.0839202	0.670818	2.58136	0.0119801	0.3384	-4.9587	up-regulated-regulated		VANGL2	0.027465	0.363059	3.0012	0.00284815	0.104755	-3.76786	up-regulated		SPINT4	0.0181626	0.278325	2.77643	0.00571554	0.0773532	-5.13572	up-regulated
STX16	0.0302545	0.251332	2.5809	0.0119945	0.3384	-4.95979	up-regulated-regulated		ADCYAP1R1	0.0789779	0.364896	3.00055	0.00285405	0.10478	-3.76976	up-regulated		A2M	0.0477182	0.616721	2.77444	0.00575007	0.0777841	-5.14117	up-regulated
AL355598.1	0.0735462	0.772109	2.58008	0.0120203	0.33856	-4.96174	up-regulated-regulated		VSIG4	0.0570483	0.878544	2.99995	0.00285955	0.104849	-3.77152	up-regulated		RP11-238K6.1	0.0449021	0.381023	2.77332	0.0057696	0.0779029	-5.14423	up-regulated
CTB-133G6.1	0.0375369	0.557888	2.57966	0.0120337	0.33856	-4.96275	up-regulated-regulated		NOX3	0.0819885	0.341604	2.99868	0.00287125	0.105013	-3.77526	up-regulated		RBMX2P5	0.0160092	0.857838	2.77233	0.00578683	0.0779782	-5.14693	up-regulated
OR6A2	0.155555	0.682333	2.57958	0.0120363	0.33856	-4.96294	up-regulated-regulated		LRAT	0.0688619	0.429711	2.9956	0.00289979	0.105616	-3.78431	up-regulated		AC079150.3	0.0755695	0.782176	2.76997	0.00582826	0.0783266	-5.15338	up-regulated
PHF2	0.0222244	0.2094	2.57911	0.0120513	0.33856	-4.96407	up-regulated-regulated		SSX1	0.0792592	0.619589	2.99533	0.00290231	0.105616	-3.78511	up-regulated		AC002978.1	0.0312698	0.814375	2.76983	0.00583074	0.0783266	-5.15377	up-regulated
WAS	0.0306243	0.325638	2.57888	0.0120585	0.33856	-4.96461	up-regulated-regulated		LINC00032	0.0777771	0.811854	2.99365	0.00291807	0.105745	-3.79006	up-regulated		AACSP1	0.0227348	0.580252	2.76931	0.00583994	0.0783421	-5.15519	up-regulated
SEC11C	0.0100015	0.0977481	2.5761	0.0121469	0.340384	-4.97122	up-regulated-regulated		DLGAP3	0.0469876	0.36648	2.99346	0.0029198	0.105745	-3.79061	up-regulated		HMGN2P7	0.0116908	0.958598	2.76887	0.00584762	0.0784089	-5.15638	up-regulated
AC136289.1	0.0259991	0.60779	2.57235	0.0122675	0.341512	-4.98016	up-regulated-regulated		GPR50	0.0765327	0.4109	2.99345	0.00291994	0.105745	-3.79065	up-regulated		GSTA1	0.0265371	0.711501	2.76654	0.00588887	0.078889	-5.16273	up-regulated
THOP1	0.0137316	0.571171	2.57192	0.0122813	0.341512	-4.98117	up-regulated-regulated		AD000864.6	0.0206916	0.376386	2.9933	0.00292129	0.105745	-3.79107	up-regulated		NTRK3	0.0241969	0.403879	2.76556	0.00590639	0.0789863	-5.16542	up-regulated
NGF	0.0375221	0.40063	2.56746	0.0124261	0.343277	-4.99178	up-regulated-regulated		CNN2P10	0.11886	0.833462	2.99263	0.00292757	0.105745	-3.79304	up-regulated		AB019441.29	0.0239409	0.67583	2.76552	0.00590702	0.0789863	-5.16552	up-regulated
JMJD8	0.0329121	0.266906	2.5674	0.012428	0.343277	-4.99191	up-regulated-regulated		CLK2	0.0132314	0.336755	2.99157	0.00293758	0.105745	-3.79616	up-regulated		RNMTL1P1	0.02241	0.860194	2.76344	0.00594423	0.0793728	-5.17119	up-regulated
TCEAL4	0.0148322	0.315349	2.56699	0.0124415	0.343277	-4.99289	up-regulated-regulated		TNRC18P2	0.0579774	0.548179	2.99122	0.00294086	0.105745	-3.79719	up-regulated		MIR7159	0.0279889	0.799768	2.76329	0.00594687	0.0793728	-5.1716	up-regulated
HCP5	0.0100893	0.177314	2.56633	0.012463	0.343277	-4.99445	up-regulated-regulated		ENPP6	0.0693105	0.473429	2.99097	0.00294317	0.105745	-3.7979	up-regulated		AC105393.2	0.0167646	0.737361	2.76248	0.0059615	0.0794583	-5.17382	up-regulated
GLRA3	0.0734699	0.221314	2.56632	0.0124632	0.343277	-4.99447	up-regulated-regulated		PTX4	0.0366142	0.664316	2.99097	0.00294325	0.105745	-3.79793	up-regulated		MIR3714	0.0765579	0.757181	2.76212	0.00596793	0.0795075	-5.17479	up-regulated
PRICKLE4	0.0415593	0.850991	2.56468	0.0125173	0.344112	-4.99838	up-regulated-regulated		KIAA0907	0.0194234	0.284135	2.99027	0.00294978	0.105745	-3.79996	up-regulated		OR7E85P	0.0253712	0.515982	2.76195	0.00597089	0.0795104	-5.17524	up-regulated
RP11-504I13.3	0.102665	0.821028	2.56288	0.0125763	0.344157	-5.00263	up-regulated-regulated		ANKFN1	0.0354128	0.652731	2.99023	0.00295018	0.105745	-3.80008	up-regulated		MOS	0.0399242	0.30386	2.76126	0.00598344	0.079641	-5.17714	up-regulated
43719	0.0166087	0.408892	2.5628	0.0125789	0.344157	-5.00283	up-regulated-regulated		CTAGE12P	0.122364	0.712922	2.98944	0.00295768	0.105745	-3.8024	up-regulated		OR7D4	0.0382166	0.427805	2.7608	0.00599169	0.0796821	-5.17838	up-regulated
RP13-270P17.1	0.0575954	0.834482	2.56262	0.0125848	0.344157	-5.00325	up-regulated-regulated		DPCR1	0.050116	0.42884	2.98938	0.00295821	0.105745	-3.80257	up-regulated		RP11-334L9.1	0.0155943	0.587018	2.76036	0.00599969	0.0796821	-5.17959	up-regulated
IGF2	0.029636	0.268318	2.561	0.0126384	0.344495	-5.00709	up-regulated-regulated		ACTRT2	0.0851728	0.67178	2.98913	0.00296065	0.105745	-3.80332	up-regulated		GUSBP10	0.0279677	0.434944	2.76033	0.00600026	0.0796821	-5.17967	up-regulated
COMMD2	0.0179287	0.210031	2.56017	0.0126663	0.344495	-5.00908	up-regulated-regulated		ZNF280A	0.0682396	0.57246	2.98826	0.00296884	0.105745	-3.80585	up-regulated		RGS7	0.0233198	0.259709	2.75954	0.00601452	0.0797352	-5.18182	up-regulated
C11orf49	0.0146192	0.359907	2.55987	0.012676	0.344495	-5.00977	up-regulated-regulated		WFDC9	0.063578	0.384627	2.98823	0.0029692	0.105745	-3.80596	up-regulated		ROBO2	0.0246031	0.4032	2.7586	0.00603145	0.0797974	-5.18436	up-regulated
NR1H4	0.0560301	0.510696	2.55756	0.0127531	0.344495	-5.01525	up-regulated-regulated		RP11-678K21.1	0.189045	0.74988	2.98798	0.0029715	0.105745	-3.80667	up-regulated		PGGT1BP1	0.0372936	0.559848	2.75668	0.00606649	0.0800097	-5.18959	up-regulated
RP5-855D21.3	0.0119262	0.119984	2.55714	0.0127671	0.344495	-5.01624	up-regulated-regulated		HAR1B	0.0944405	0.503276	2.98628	0.00298779	0.106014	-3.81167	up-regulated		KIAA1456	0.0221492	0.391992	2.75536	0.00609062	0.0801844	-5.19318	up-regulated
KRT74	0.0470889	0.473452	2.55709	0.0127688	0.344495	-5.01636	up-regulated-regulated		TUBB8P5	0.108025	0.865532	2.98561	0.00299418	0.106014	-3.81363	up-regulated		RP11-4N23.1	0.0759236	0.655375	2.75486	0.00609979	0.0801959	-5.19454	up-regulated
SNRPG	0.0123279	0.139174	2.55665	0.0127836	0.344546	-5.01741	up-regulated-regulated		HCRTR2	0.0484078	0.357335	2.9853	0.00299713	0.106014	-3.81453	up-regulated		KCNT2	0.0171395	0.157141	2.75132	0.00616495	0.0809581	-5.20414	up-regulated
DISP2	0.0228981	0.353096	2.55622	0.012798	0.344546	-5.01843	up-regulated-regulated		C14orf132	0.0135857	0.291046	2.98517	0.00299839	0.106014	-3.81491	up-regulated		MIR6784	0.0150024	0.882863	2.74795	0.00622774	0.0815454	-5.21329	up-regulated
SLC25A43	0.0217382	0.287173	2.55563	0.0128177	0.344546	-5.01982	up-regulated-regulated		CA15P1	0.142223	0.80654	2.98446	0.00300519	0.106014	-3.81698	up-regulated		KRT8P7	0.024548	0.668821	2.74756	0.00623495	0.0815662	-5.21433	up-regulated
EFCAB10	0.0624667	0.349339	2.55561	0.0128182	0.344546	-5.01985	up-regulated-regulated		SRD5A3P1	0.0960182	0.763431	2.98425	0.00300725	0.106014	-3.81761	up-regulated		OTOS	0.0157314	0.343142	2.7469	0.00624737	0.0815913	-5.21613	up-regulated
UNC79	0.0754572	0.575235	2.55453	0.0128544	0.344797	-5.02241	up-regulated-regulated		OR2G3	0.0776903	0.618782	2.98414	0.0030083	0.106014	-3.81793	up-regulated		CNN2P8	0.0344112	0.79046	2.74686	0.00624813	0.0815913	-5.21624	up-regulated
RP11-32B5.7	0.0827151	0.559624	2.55423	0.0128647	0.344797	-5.02313	up-regulated-regulated		NPFFR2	0.0457995	0.243869	2.98361	0.00301339	0.106065	-3.81948	up-regulated		CTD-2216M2.1	0.0321343	0.547018	2.74219	0.00633627	0.0822433	-5.22889	up-regulated
RP11-586D19.1	0.0323099	0.279579	2.55392	0.012875	0.344797	-5.02385	up-regulated-regulated		LINC01257	0.0789255	0.580371	2.98269	0.00302231	0.10617	-3.82218	up-regulated		KRTAP4-6	0.0449777	0.623736	2.74211	0.00633775	0.0822433	-5.2291	up-regulated
[truncated: 2,868 more rows]

## Sheet: SNP
Supplementary Table 1E. Race differences in SNPs.
[truncated: 23,934 more rows]
