# Supplementary material for: Comprehensive signature analysis of drug metabolism differences in the White, Black and Asian prostate cancer patients
Source: Aging (Albany NY). 2021 Jun 18;13(12):16316–40. doi: 10.18632/aging.203158 (PMC8266326; doi:10.18632/aging.203158)
Supplement: Supplementary Table 3 [file aging-13-203158-s004.xlsx]

## Sheet: GSEA
Supplementary Table 3A. GSEA enrichment analysis of mRNA for White,Black and Asian PCa patients.
Asian VS Black								Asian VS White								Black VS White
Black				Asian				White				Asian				White				Black
GS<br> follow link to MSigDB	SIZE	NOM p-val	FDR q-val	GS<br> follow link to MSigDB	SIZE	NOM p-val	FDR q-val	GS<br> follow link to MSigDB	SIZE	NOM p-val	FDR q-val	GS<br> follow link to MSigDB	SIZE	NOM p-val	FDR q-val	GS<br> follow link to MSigDB	SIZE	NOM p-val	FDR q-val	GS<br> follow link to MSigDB	SIZE	NOM p-val	FDR q-val
yague pretumor drug resistance up	7	0.0070922	0.139355	reactome olfactory signaling pathway	369	0	0	kang doxorubicin resistance up	54	0	0.00105054	schaeffer prostate development and cancer box6 up	7	0.0147059	0.155156	kang doxorubicin resistance up	54	0	0	liu prostate cancer dn	473	0	0.000597351
graessmann response to mc and doxorubicin dn	723	0	0.144183	kegg olfactory transduction	359	0	0	graessmann response to mc and doxorubicin dn	723	0	0.0616462	kegg olfactory transduction	359	0	0	graessmann response to mc and doxorubicin dn	723	0	0.0547419	reactome pi3k events in erbb4 signaling	10	0	0.0513373
creighton endocrine therapy resistance 5	465	0	0.144496	reactome beta defensins	39	0	0	creighton endocrine therapy resistance 5	465	0	0.0950585	reactome beta defensins	39	0	0	creighton endocrine therapy resistance 2	426	0	0.0851045	setlur prostate cancer tmprss2 erg fusion dn	19	0.00310559	0.0597378
massarweh tamoxifen resistance up	550	0	0.147138	reactome defensins	49	0	0.000219316	tooker gemcitabine resistance dn	123	0.00203874	0.100746	rickman head and neck cancer f	54	0	0	bilanges rapamycin sensitive via tsc1 and tsc2	64	0.0013089	0.111086	wallace prostate cancer race up	274	0	0.0745125
coldren gefitinib resistance dn	216	0	0.147242	reactome keratinization	216	0	0.000267027	kang doxorubicin resistance dn	19	0.0132212	0.103953	reactome defensins	49	0	0	kegg metabolism of xenobiotics by cytochrome p450	68	0.00628141	0.145844	reactome potassium channels	97	0	0.116544
bilanges serum and rapamycin sensitive genes	49	0.00544662	0.146368	rickman head and neck cancer f	54	0	0.00218923	massarweh tamoxifen resistance up	550	0	0.111432	reactome striated muscle contraction	36	0	0	reactome serotonin receptors	12	0.019174	0.201043	reactome cytochrome p450 arranged by substrate type	65	0	0.147236
honma docetaxel resistance	34	0.0182648	0.145308	reactome digestion	22	0	0.00551936	creighton endocrine therapy resistance 3	686	0	0.119834	reactome antimicrobial peptides	94	0	0.00136253	wang response to androgen up	27	0.036635	0.244693	reactome voltage gated potassium channels	42	0	0.152092
doane response to androgen dn	235	0.001002	0.14445	reactome digestion and absorption	27	0	0.00649064	coldren gefitinib resistance dn	216	0	0.125133	reactome digestion	22	0	0.0017793	reactome sirt1 negatively regulates rrna expression	66	0	0	kegg jak stat signaling pathway	155	0	0.156433
wang cisplatin response and xpc dn	216	0	0.144606	reactome antimicrobial peptides	94	0	0.011457	creighton endocrine therapy resistance 1	504	0	0.128829	burton adipogenesis peak at 2hr	42	0	0.00435515	liu prostate cancer up	92	0	5.859e-05	reactome negative regulation of tcf dependent signaling by wnt ligand antagonists	15	0.0157233	0.158254
tooker gemcitabine resistance dn	123	0.00613497	0.151237	reactome striated muscle contraction	36	0	0.0160887	creighton endocrine therapy resistance 2	426	0	0.176865	reactome digestion and absorption	27	0	0.00414053	reactome transcriptional regulation of granulopoiesis	88	0	8.48004e-05	masri resistance to tamoxifen and aromatase inhibitors dn	18	0.0296053	0.245949
creighton endocrine therapy resistance 1	504	0	0.157002	khetchoumian trim24 targets dn	8	0.00367647	0.0344552	massarweh tamoxifen resistance dn	236	0.007	0.197814	geserick tert targets dn	21	0	0.00640029	reactome nucleosome assembly	73	0	0.000116906	reactome striated muscle contraction	36	0	0
kang doxorubicin resistance up	54	0.0245989	0.160308	reactome digestion of dietary lipid	6	0.00350877	0.0547077	creighton endocrine therapy resistance 4	286	0.01	0.230021	khetchoumian trim24 targets dn	8	0	0.010763	reactome rna polymerase i promoter escape	89	0	0.000300362	pid il27 pathway	26	0	0
creighton endocrine therapy resistance 3	686	0	0.159488	reactome orexin and neuropeptides ff and qrfp bind to their respective receptors	8	0.00722022	0.0781399	reactome rna polymerase ii transcription pre initiation and promoter opening	47	0	0.0470901	reactome orexin and neuropeptides ff and qrfp bind to their respective receptors	8	0.00390625	0.0134241	tang senescence tp53 targets dn	55	0	0.000479692	chemello soleus vs edl myofibers up	20	0	0.000512015
graessmann response to mc and doxorubicin up	589	0	0.164795	reactome activation of the phototransduction cascade	10	0.0045045	0.0918712	reactome regulation of cholesterol biosynthesis by srebp srebf	55	0	0.0446189	reactome activation of the phototransduction cascade	10	0	0.0225987	tomlins prostate cancer up	39	0	0.00129604	uzonyi response to leukotriene and thrombin	35	0	0.000597725
kegg metabolism of xenobiotics by cytochrome p450	68	0.028125	0.166584	florio human neocortex	34	0.00793651	0.12325	reactome rna polymerase ii pre transcription events	84	0	0.051871	chemello soleus vs edl myofibers up	20	0	0.0526405	reactome rna polymerase i transcription	109	0	0.00131882	ji carcinogenesis by kras and stk11 up	12	0	0.00241591
doane response to androgen up	172	0.00101112	0.166455	bruneau septation atrial	5	0.0159236	0.121951	reactome tp53 regulates transcription of dna repair genes	65	0	0.0525524	delaserna targets of myod and smarca4	11	0.00956938	0.0583285	kobayashi egfr signaling 24hr dn	251	0	0.00306334	ebauer myogenic targets of pax3 foxo1 fusion	48	0	0.0076157
kegg drug metabolism cytochrome p450	70	0.0288462	0.18385	reactome digestion of dietary carbohydrate	11	0.00847458	0.115978	reactome rna polymerase ii transcription elongation	61	0	0.0577758	reactome digestion of dietary lipid	6	0	0.0664417	reichert mitosis lin9 targets	27	0	0.00491756	reactome naplus cl dependent neurotransmitter transporters	19	0	0.00978486
tooker gemcitabine resistance up	78	0.0397074	0.205042	reactome amine ligand binding receptors	42	0	0.202457	reactome grb2:sos provides linkage to mapk signaling for integrins	15	0.00123153	0.0575278	florio human neocortex	34	0	0.06696	reactome mitotic spindle checkpoint	110	0	0.00616858	pid rhodopsin pathway	22	0.0034965	0.0246838
massarweh tamoxifen resistance dn	236	0.012024	0.220796					reactome regulation of plk1 activity at g2 m transition	87	0	0.0603602	reactome biosynthesis of maresin like spms	6	0	0.0679055	reactome g2 m checkpoints	167	0	0.0138849	ono aml1 targets up	25	0	0.0241918
creighton endocrine therapy resistance 4	286	0.013013	0.227022					kegg ribosome	86	0	0.0602784	ebauer myogenic targets of pax3 foxo1 fusion	48	0	0.0716002	scian cell cycle targets of tp53 and tp73 dn	21	0.00425532	0.0489385	shin b cell lymphoma cluster 9	19	0	0.0234302
reactome rna polymerase ii transcription pre initiation and promoter opening	47	0	0.210243					kegg nucleotide excision repair	44	0.00108578	0.0655861	reactome digestion of dietary carbohydrate	11	0.00490196	0.0690459	wallace prostate cancer race dn	82	0.00120337	0.0547837	pid il23 pathway	37	0	0.0242191
graessmann apoptosis by doxorubicin dn	1690	0	0.208119					reactome copii mediated vesicle transport	68	0.00104275	0.0678017	bruneau septation atrial	5	0.0128205	0.102543	yegnasubramanian prostate cancer	129	0	0.0572935	onder cdh1 targets 3 dn	57	0	0.0242302
reactome rna polymerase ii transcription elongation	61	0.00107181	0.216975					reactome mitotic g2 g2 m phases	199	0	0.0692136	matzuk cumulus expansion	9	0.0146341	0.0997019	reactome respiratory electron transport	99	0.00116686	0.0986267	hollern squamous breast tumor	155	0	0.0270846
reactome rna polymerase ii pre transcription events	84	0	0.180748					reactome mitotic spindle checkpoint	110	0	0.0690302	pid il27 pathway	26	0.0192308	0.110109	fischer g1 s cell cycle	195	0	0.108698	kinney dnmt1 methylation targets	14	0	0.0293095
ouyang prostate cancer progression up	20	0.00122399	0.169329					reactome cell cycle mitotic	535	0	0.0704753	wagschal ehmt2 targets up	16	0	0.111916	reactome metabolism of rna	660	0	0.110689	hummerich benign skin tumor dn	17	0	0.0304009
reactome peptide hormone biosynthesis	14	0.00369914	0.157246					schaeffer prostate development 6hr dn	440	0	0.0767483	reactome fgfr2c ligand binding and activation	13	0.0240385	0.143408	reactome respiratory electron transport atp synthesis by chemiosmotic coupling and heat production by uncoupling proteins	106	0.00117233	0.130355	smid breast cancer luminal b dn	540	0	0.0293687
yao temporal response to progesterone cluster 13	159	0	0.141992					reactome transcriptional regulation by tp53	361	0	0.075269	reactome pi3k events in erbb4 signaling	10	0.0142857	0.144126	wallace prostate cancer up	20	0.0196906	0.130581	kuninger igf1 vs pdgfb targets up	78	0	0.0305732
liu prostate cancer dn	473	0	0.140233					reactome trans golgi network vesicle budding	72	0	0.0752726	reactome vasopressin like receptors	6	0.0243056	0.153658	benporath myc max targets	758	0	0.144181	yamashita methylated in prostate cancer	62	0	0.0301306
reactome rna polymerase i transcription initiation	47	0.00218341	0.144976					reactome dna repair	329	0	0.077137	reactome gamma carboxylation transport and amino terminal cleavage of proteins	11	0.00917431	0.15493	reactome tryptophan catabolism	14	0.0160116	0.153419	rickman head and neck cancer e	83	0	0.0315555
reactome tp53 regulates transcription of dna repair genes	65	0.00105374	0.143835					reactome recruitment of numa to mitotic centrosomes	94	0	0.0774504	nojima sfrp2 targets up	31	0	0.155408	biocarta no1 pathway	28	0.018732	0.153052	wagschal ehmt2 targets up	16	0	0.0321563
reactome mitotic g2 g2 m phases	199	0	0.139754					reactome regulation of tp53 activity through acetylation	29	0	0.0792223	reactome amine ligand binding receptors	42	0	0.155056	reactome g0 and early g1	27	0.0203804	0.20848	delaserna targets of myod and smarca4	11	0.00306748	0.0342391
schaeffer prostate development 6hr dn	440	0	0.144171					acosta proliferation independent myc targets up	83	0	0.0811944	reactome endosomal vacuolar pathway	11	0.0241546	0.15646	reactome intra golgi and retrograde golgi to er traffic	201	0.00220751	0.208741	phong tnf targets up	63	0	0.0348779
kegg rna polymerase	29	0.0034642	0.139887					reactome mitotic g1 g1 s phases	149	0	0.0879968	rashi nfkb1 targets	16	0.017341	0.174436	reactome mitotic g1 g1 s phases	149	0.00231214	0.208255	kegg cytokine cytokine receptor interaction	262	0	0.0462753
reactome oncogenic mapk signaling	80	0.00104603	0.139614					reactome er to golgi anterograde transport	154	0	0.0880421	biocarta npp1 pathway	10	0.0170213	0.176524	reactome tcf dependent signaling in response to wnt	232	0.00107527	0.209098	naba secreted factors	341	0	0.0460979
pid pi3kci pathway	48	0.00554324	0.141854					reactome rna polymerase i transcription initiation	47	0.00422387	0.0953179	naba secreted factors	341	0	0.207206	graessmann apoptosis by doxorubicin dn	1690	0	0.208657	korkola seminoma dn	11	0	0.047593
reactome metabolism of rna	660	0	0.139963					reactome transport to the golgi and subsequent modification	185	0	0.0950554	wang nfkb targets	22	0.037594	0.204997	reactome the citric acid tca cycle and respiratory electron transport	157	0.00452489	0.227686	korkola choriocarcinoma dn	11	0.00321543	0.0524331
kegg pyrimidine metabolism	98	0.00103093	0.146334					reactome respiratory electron transport	99	0.00101523	0.0951292	vetter targets of prkca and ets1 dn	16	0.025974	0.203091	sotiriou breast cancer grade 1 vs 3 up	152	0	0	kegg allograft rejection	35	0	0.0532288
reactome regulation of tp53 activity	159	0.00101626	0.145242					reactome p130cas linkage to mapk signaling for integrins	15	0.00493827	0.0973687	reactome removal of aminoterminal propeptides from gamma carboxylated proteins	10	0.0180995	0.202543	rosty cervical cancer proliferation cluster	139	0	0	johnstone parvb targets 1 up	6	0	0.0517986
reactome er to golgi anterograde transport	154	0	0.146567					reactome fceri mediated mapk activation	32	0.00868621	0.0978037	pid rhodopsin pathway	22	0.025641	0.203305	reactome hdacs deacetylate histones	92	0	0	reactome scavenging of heme from plasma	13	0.00321543	0.0589177
kegg endocytosis	180	0.00101317	0.147306					reactome retrograde transport at the trans golgi network	49	0.00527426	0.100446	lu tumor vasculature up	29	0.0185185	0.208505	reactome dna methylation	63	0	0	jaeger metastasis dn	253	0	0.0592159
reactome transcriptional regulation by tp53	361	0	0.147476					liu prostate cancer up	92	0.00204499	0.101174					reactome activated pkn1 stimulates transcription of ar androgen receptor regulated genes klk2 and klk3	65	0	0	korkola embryonal carcinoma dn	12	0	0.0623029
chemnitz response to prostaglandin e2 dn	356	0	0.146325					pid mtor 4pathway	69	0.00621762	0.102685					florio neocortex basal radial glia dn	186	0	0	reactome activation of matrix metalloproteinases	33	0	0.0648326
reactome mapk family signaling cascades	293	0	0.148463					reactome highly calcium permeable postsynaptic nicotinic acetylcholine receptors	11	0.0176768	0.10356					reactome prc2 methylates histones and dna	71	0	0	kegg intestinal immune network for iga production	45	0	0.0673966
reactome vesicle mediated transport	665	0	0.144409					reactome beta catenin phosphorylation cascade	17	0.0120773	0.103536					whitfield cell cycle literature	42	0	0	reactome interleukin 10 signaling	45	0	0.0735608
reactome the citric acid tca cycle and respiratory electron transport	157	0.00101215	0.144471					wu apoptosis by cdkn1a via tp53	51	0.00742312	0.104297					zhan multiple myeloma pr up	46	0	0	naba matrisome associated	746	0	0.0763299
parent mtor signaling up	550	0	0.145385					mikkelsen ips with hcp h3k27me3	101	0.00203666	0.104248					reactome meiotic recombination	85	0	0	wang nfkb targets	22	0	0.0765021
reactome rna polymerase iii transcription initiation from type 1 promoter	28	0.0227015	0.145952					reactome rna polymerase i transcription termination	31	0.0196078	0.104118					reactome ercc6 csb and ehmt2 g9a positively regulate rrna expression	74	0	7.21108e-05	nagashima egf signaling up	54	0.00452489	0.076153
reactome rna polymerase iii transcription termination	23	0.0259434	0.144496					kegg endocytosis	180	0	0.106858					farmer breast cancer cluster 2	33	0	6.696e-05	tonks targets of runx1 runx1t1 fusion granulocyte dn	17	0.00632911	0.075138
reactome xenobiotics	24	0.022673	0.143974					biocarta mapk pathway	81	0.0030581	0.107705					reactome condensation of prophase chromosomes	72	0	6.2496e-05	pid cone pathway	22	0.00763359	0.0736383
reactome dna replication	127	0.0030581	0.144408					reactome gastrin creb signalling pathway via pkc and mapk	18	0.019025	0.115117					reactome rho gtpases activate pkns	92	0	5.51436e-05	reactome activation of trka receptors	6	0	0.0726105
fischer direct p53 targets meta analysis	303	0	0.143191					kegg pyrimidine metabolism	98	0.00407747	0.116257					nakayama soft tissue tumors pca2 up	87	0	5.208e-05	wong endmetrium cancer dn	74	0	0.0737333
reactome signaling by met	79	0.00942408	0.143174					flotho pediatric all therapy response dn	28	0.0124858	0.116688					lee early t lymphocyte up	106	0	4.9339e-05	pedersen metastasis by erbb2 isoform 1	45	0	0.0725543
reactome copii mediated vesicle transport	68	0.0180085	0.144036					reactome metabolism of non coding rna	54	0.0115425	0.116588					kong e2f3 targets	95	0	4.6872e-05	doane breast cancer esr1 dn	46	0	0.0812957
phong tnf response via p38 partial	159	0.00101112	0.143606					reactome the citric acid tca cycle and respiratory electron transport	157	0	0.117364					reactome reproduction	143	0	4.464e-05	reactome ngf independant trka activation	5	0.00280899	0.0840243
reactome regulation of tp53 activity through acetylation	29	0.0147225	0.143854					kegg prostate cancer	89	0.00407332	0.1176					zhou cell cycle genes in ir response 24hr	122	0	0.000121988	wang classic adipogenic targets of pparg	28	0.00369004	0.0897047
reactome stabilization of p53	56	0.0140389	0.144326					pid ar tf pathway	53	0.00525762	0.122632					gavin foxp3 targets cluster p6	90	0	0.000112229	reactome muscle contraction	205	0	0.0968047
graessmann apoptosis by doxorubicin up	1108	0	0.144547					reactome met activates ras signaling	11	0.0344388	0.123248					reactome meiosis	117	0	0.000107913	saenz detox pathway and carcinogenesis dn	12	0.0060423	0.0960466
ongusaha tp53 targets	34	0.0260476	0.145069					reactome vesicle mediated transport	665	0	0.123451					graham normal quiescent vs normal dividing dn	88	0	0.000173663	sengupta nasopharyngeal carcinoma with lmp1 dn	162	0	0.0945908
biocarta ras pathway	22	0.0298686	0.1458					sasson response to gonadotrophins dn	86	0.011213	0.124041					whiteford pediatric cancer markers	115	0	0.000290004	biocarta il17 pathway	15	0.0101351	0.0932063
biocarta mapk pathway	81	0.00733753	0.145824					kegg rna polymerase	29	0.0281215	0.124153					croonquist il6 deprivation dn	95	0	0.000280337	kobayashi egfr signaling 6hr dn	17	0.0107914	0.0924059
kegg prostate cancer	89	0.00726895	0.146482					pid pi3kci pathway	48	0.010661	0.126076					winnepenninckx melanoma metastasis up	159	0	0.000271294	reactome miscellaneous substrates	12	0.00576369	0.0931698
reactome androgen biosynthesis	11	0.0377113	0.150764					reactome mapk6 mapk4 signaling	90	0.00609137	0.127149					reactome oxidative stress induced senescence	122	0	0.000262816	burton adipogenesis 1	29	0.00373134	0.0976067
reactome g protein gated potassium channels	24	0.0300578	0.151822					pid wnt canonical pathway	20	0.0264368	0.126945					croonquist nras signaling dn	70	0	0.000311532	biocarta no2il12 pathway	15	0.00333333	0.0960409
perez tp53 and tp63 targets	198	0.00406918	0.153677					fischer direct p53 targets meta analysis	303	0	0.12866					reactome depurination	56	0	0.000411879	reactome synthesis of 5 eicosatetraenoic acids	9	0.00914634	0.0960216
kegg basal transcription factors	35	0.0201342	0.153733					reactome g0 and early g1	27	0.0343681	0.130743					reactome formation of the beta catenin:tcf transactivating complex	90	0	0.0004803	sakai chronic hepatitis vs liver cancer dn	35	0.00409836	0.100666
reactome copi mediated anterograde transport	101	0.00824742	0.154051					wallace prostate cancer race dn	82	0.00822199	0.130599					reactome nonhomologous end joining nhej	68	0	0.000466958	kegg autoimmune thyroid disease	50	0	0.101879
reactome rna polymerase ii transcribes snrna genes	74	0.0116034	0.154127					reactome regulation of tp53 expression and degradation	37	0.0206972	0.132291					graham cml dividing vs normal quiescent up	182	0	0.00054089	mcgarvey silenced by methylation in colon cancer	42	0.00438597	0.10213
reactome intracellular signaling by second messengers	302	0	0.155097					stein esrra targets responsive to estrogen dn	41	0.0296053	0.132827					odonnell tfrc targets dn	125	0	0.000550967	debosscher nfkb targets repressed by glucocorticoids	23	0.00714286	0.104694
reactome signaling by erythropoietin	25	0.0300578	0.157451					wang response to androgen up	27	0.0287026	0.133475					reactome positive epigenetic regulation of rrna expression	104	0	0.00060773	varela zmpste24 targets dn	41	0.00406504	0.103163
reactome trans golgi network vesicle budding	72	0.0192102	0.158811					pid p53 downstream pathway	136	0.0040282	0.133494					reactome rmts methylate histone arginines	77	0	0.000615981	reactome phase 3 rapid repolarisation	8	0.0113314	0.102042
reactome fceri mediated mapk activation	32	0.0394588	0.16261					doane response to androgen up	172	0.00100402	0.133465					reactome base excision repair ap site formation	63	0	0.00062355	reactome peptide hormone biosynthesis	14	0.0127389	0.105139
reactome rna polymerase iii transcription	41	0.0300334	0.162388					reactome negative feedback regulation of mapk pathway	6	0.0484094	0.142429					fischer dream targets	958	0	0.000761088	reactome formation of the cornified envelope	128	0	0.103913
reactome metabolism of steroids	149	0.00914634	0.173468					doane response to androgen dn	235	0	0.144271					reactome hdms demethylate histones	48	0	0.000785966	biocarta nkt pathway	26	0	0.103311
reactome rna polymerase iii chain elongation	18	0.0473876	0.173052					scian inversed targets of tp53 and tp73 dn	30	0.0355161	0.147241					reactome pre notch expression and processing	106	0	0.00081008	rickman head and neck cancer c	107	0	0.106147
reactome glucose metabolism	92	0.0156087	0.18441					nelson response to androgen up	82	0.012333	0.14884					reactome meiotic synapsis	79	0	0.00107636	reactome leukotriene receptors	5	0	0.116214
biocarta ion pathway	5	0.0476191	0.184266					reactome cellular responses to external stimuli	533	0	0.156555					dutertre estradiol response 24hr up	318	0	0.00131162	pid il12 stat4 pathway	33	0	0.121044
schaeffer prostate development 12hr dn	47	0.0462046	0.185744					riggins tamoxifen resistance dn	215	0.00501002	0.159337					ishida e2f targets	52	0	0.0013035	reactome chemokine receptors bind chemokines	48	0	0.131801
kegg nucleotide excision repair	44	0.0418006	0.194665					reactome tgf beta receptor signaling in emt epithelial to mesenchymal transition	16	0.0497041	0.162497					molenaar targets of ccnd1 and cdk4 dn	55	0	0.00127012	biocarta stem pathway	15	0.015625	0.130498
kegg peroxisome	78	0.0476191	0.194845					graessmann response to mc and doxorubicin up	589	0	0.164226					reactome senescence associated secretory phenotype sasp	108	0	0.00129345	smid breast cancer normal like up	452	0	0.132362
weigel oxidative stress by tbh and h2o2	35	0.049162	0.198222					reactome activated ntrk2 signals through ras	9	0.0481144	0.164615					zhou cell cycle genes in ir response 6hr	82	0	0.00126905	gutierrez waldenstroems macroglobulinemia 1 dn	8	0.00931677	0.13673
perez tp53 targets	1116	0	0.199324					reactome cellular responses to stress	438	0	0.169358					hoffmann large to small pre bii lymphocyte up	149	0	0.00136651	geserick tert targets dn	21	0.0147059	0.141891
reactome cellular responses to external stimuli	533	0.001	0.213625					reactome metabolism of steroids	149	0.0110887	0.172399					reactome g2 m dna damage checkpoint	94	0	0.00142646	lim mammary luminal progenitor up	58	0	0.141269
wallace prostate cancer race up	274	0.00801603	0.215188					wang cisplatin response and xpc up	181	0.00902708	0.176432					reactome transcriptional regulation by small rnas	105	0	0.00151773	huper breast basal vs luminal dn	56	0.00480769	0.139764
reactome golgi to er retrograde transport	132	0.0282258	0.216526					liu prostate cancer dn	473	0	0.178979					burton adipogenesis peak at 24hr	44	0	0.00181858	pyeon hpv positive tumors dn	10	0.0175953	0.138698
reactome cellular responses to stress	438	0.006	0.240302					reactome tp53 regulates metabolic genes	84	0.0468909	0.198822					reactome gene silencing by rna	134	0	0.00180329	kegg proximal tubule bicarbonate reclamation	23	0.0109489	0.145841
kegg mapk signaling pathway	267	0.0180361	0.247711					reactome signaling by wnt	324	0.007	0.217206					reactome dna damage telomere stress induced senescence	80	0	0.00177273	biocarta pepi pathway	8	0.0146199	0.147336
meissner brain hcp with h3k4me2	18	0	0.00611793					chemnitz response to prostaglandin e2 up	139	0.0322581	0.222468					horiuchi wtap targets dn	307	0	0.00180567	iglesias e2f targets dn	13	0.0162338	0.146004
mikkelsen es hcp with h3k27me3	39	0	0.0202597					reactome mapk family signaling cascades	293	0.008	0.223982					reactome activation of hox genes during differentiation	120	0	0.0019907	reactome hyaluronan biosynthesis and export	5	0.014245	0.144814
kim hypoxia	19	0	0.0200946					kegg wnt signaling pathway	150	0.0442211	0.244755					reactome runx1 regulates genes involved in megakaryocyte differentiation and platelet function	95	0	0.00283115	lee liver cancer hepatoblast	16	0.00943396	0.147465
dacosta uv response via ercc3 common dn	451	0	0.24543					rosty cervical cancer proliferation cluster	139	0	0.0531342					reactome negative epigenetic regulation of rrna expression	107	0	0.00283075	sabates colorectal adenoma up	134	0	0.148382
reactome highly calcium permeable postsynaptic nicotinic acetylcholine receptors	11	0.00128535	0.228671					croonquist il6 deprivation dn	95	0	0.0361197					benporath proliferation	145	0	0.00317425	kegg primary immunodeficiency	35	0.00358423	0.146962
reactome map2k and mapk activation	40	0.00110375	0.239395					pujana xprss int network	166	0	0.0369853					reactome hats acetylate histones	138	0	0.00312615	matzuk cumulus expansion	9	0.0130293	0.146002
tesar jak targets mouse es d3 up	6	0.00146413	0.232737					holleman asparaginase resistance all dn	25	0.00113122	0.0413285					marson bound by e2f4 unstimulated	668	0	0.00341408	reactome eicosanoid ligand binding receptors	15	0.00649351	0.146771
reactome signaling by ras mutants	58	0	0.214427					croonquist nras signaling dn	70	0	0.0425701					montero thyroid cancer poor survival up	12	0	0.00341873	reactome wnt ligand biogenesis and trafficking	26	0.00373134	0.149232
pid s1p s1p2 pathway	24	0.00233918	0.223073					pid fanconi pathway	47	0	0.0392047					mori immature b lymphocyte dn	89	0	0.00346387	reactome degradation of the extracellular matrix	140	0	0.151544
andersen cholangiocarcinoma class2	175	0	0.215941					florio neocortex basal radial glia dn	186	0	0.0465354					reactome cell cycle checkpoints	289	0	0.00346779	biocarta il12 pathway	19	0.00793651	0.150126
shen smarca2 targets up	418	0	0.225891					dacosta uv response via ercc3 common dn	451	0	0.0458404					pid aurora b pathway	37	0	0.00351085	murakami uv response 6hr dn	21	0.0104167	0.148855
reactome regulation of cholesterol biosynthesis by srebp srebf	55	0	0.229466					pujana brca centered network	118	0	0.0475429					fischer g2 m cell cycle	233	0	0.00356622	vandesluis commd1 targets group 3 dn	34	0.0110701	0.147408
biocarta tall1 pathway	15	0.00511509	0.229314					dazard response to uv nhek dn	291	0	0.0418284					yu myc targets up	41	0	0.00372202	pid erbb network pathway	15	0.0152905	0.152905
pid ras pathway	30	0.00112486	0.226658					zhang breast cancer progenitors up	415	0	0.0415184					sarrio epithelial mesenchymal transition up	178	0	0.00393596	reactome translocation of zap 70 to immunological synapse	16	0.00358423	0.151868
reactome signaling by moderate kinase activity braf mutants	45	0	0.219278					reactome intra golgi traffic	44	0	0.0420842					greenbaum e2a targets up	32	0	0.0039331	cadwell atg16l1 targets up	96	0	0.153117
biocarta egf pathway	27	0.00232019	0.216038					gentles leukemic stem cell dn	19	0	0.055922					reactome processing of dna double strand break ends	96	0	0.00483858	lee liver cancer acox1 dn	65	0.00571429	0.157924
pid s1p s1p3 pathway	29	0	0.219993					reactome polo like kinase mediated events	16	0	0.056372					fujii ybx1 targets dn	190	0	0.00492103	liu cdx2 targets dn	8	0.00874636	0.157558
reactome formation of incision complex in gg ner	43	0.00111111	0.211728					finetti breast cancer kinome red	16	0.00120919	0.0545716					pid plk1 pathway	46	0	0.00575361	pid il12 2pathway	63	0	0.161555
pid erbb1 receptor proximal pathway	35	0	0.207666					pyeon cancer head and neck vs cervical up	182	0	0.0540016					vantveer breast cancer metastasis dn	127	0	0.00598501	vilimas notch1 targets up	53	0	0.160901
reactome infectious disease	381	0	0.201008					shen smarca2 targets up	418	0	0.0527574					reactome dna double strand break response	76	0	0.00592252	huper breast basal vs luminal up	52	0.00425532	0.160394
pid s1p s1p4 pathway	14	0.00250627	0.194123					reactome reactions specific to the complex n glycan synthesis pathway	10	0	0.0511897					kauffmann melanoma relapse up	60	0	0.00589567	lee liver cancer ciprofibrate dn	65	0	0.163889
zhan early differentiation genes dn	42	0.00447928	0.189542					graessmann apoptosis by doxorubicin dn	1690	0	0.0554877					reactome pkmts methylate histone lysines	69	0	0.00597081	west adrenocortical tumor markers dn	19	0.0162866	0.16552
pilon klf1 targets dn	1959	0	0.184571					ramalho stemness up	194	0	0.0532559					reactome chromosome maintenance	109	0	0.00594425	biocarta inflam pathway	27	0.0190114	0.179623
biocarta biopeptides pathway	29	0.00114155	0.187421					reactome transcription of the hiv genome	73	0	0.0519921					acevedo liver cancer with h3k9me3 dn	115	0	0.00605005	smid breast cancer relapse in lung up	22	0.0114943	0.18084
whitfield cell cycle g1 s	126	0	0.186818					pid epo pathway	33	0	0.0500364					boyault liver cancer subclass g3 up	190	0	0.00608827	reactome regulation of gene expression by hypoxia inducible factor	11	0.0224359	0.184383
dacosta uv response via ercc3 dn	836	0	0.182905					pilon klf1 targets dn	1959	0	0.05482					kegg systemic lupus erythematosus	132	0	0.00621522	hummerich malignant skin tumor dn	19	0.0110294	0.186817
reactome fceri mediated caplus2 mobilization	31	0.00112613	0.182533					fischer dream targets	958	0	0.0534939					cairo hepatoblastoma classes up	594	0	0.0061978	smid breast cancer erbb2 dn	5	0.0111421	0.190295
dazard response to uv nhek dn	291	0	0.184539					reactome global genome nucleotide excision repair gg ner	84	0	0.0530873					burton adipogenesis 3	100	0	0.00642977	kegg asthma	28	0.0229008	0.193745
reactome hiv infection	234	0	0.177077					villanueva liver cancer krt19 up	174	0	0.0526371					lindgren bladder cancer cluster 3 up	322	0	0.00755978	yague pretumor drug resistance up	7	0.0152905	0.198564
beier glioma stem cell dn	65	0.00105263	0.175359					reactome map2k and mapk activation	40	0	0.0512356					reactome resolution of sister chromatid cohesion	125	0	0.00759943	ono foxp3 targets up	24	0.0152091	0.198845
leonard hypoxia	42	0.00110132	0.172818					sotiriou breast cancer grade 1 vs 3 up	152	0	0.0528706					eguchi cell cycle rb1 targets	23	0	0.00823004	biocarta rhodopsin pathway	9	0.022082	0.202054
mikkelsen ips icp with h3k27me3	54	0	0.165366					marson bound by e2f4 unstimulated	668	0	0.0570765					rhodes cancer meta signature	65	0	0.00832128	reactome beta defensins	39	0.0075188	0.202363
biocarta pdgf pathway	28	0.00340909	0.162756					udayakumar med1 targets up	129	0	0.0562796					gobert oligodendrocyte differentiation up	555	0	0.00845964	wotton runx targets up	21	0.0189274	0.20455
pid gmcsf pathway	36	0	0.158933					reactome translation	292	0	0.0552365					reactome rho gtpase effectors	320	0	0.0090034	smid breast cancer relapse in bone dn	300	0	0.203753
pid s1p s1p1 pathway	21	0.00240964	0.15942					tesar jak targets mouse es d3 up	6	0	0.0553197					reactome mitotic prophase	141	0	0.00891058	nakayama soft tissue tumors pca2 dn	79	0.0103093	0.204754
ji carcinogenesis by kras and stk11 up	12	0.00387597	0.156694					biocarta akap95 pathway	11	0	0.0561103					odonnell targets of myc and tfrc dn	45	0	0.00902963	reactome vitamins	6	0.0215633	0.204152
debiasi apoptosis by reovirus infection dn	267	0	0.15646					reactome centrosome maturation	81	0	0.0572923					reactome telomere maintenance	82	0	0.00978823	meissner brain hcp with h3k27me3	262	0	0.205147
reactome highly calcium permeable nicotinic acetylcholine receptors	9	0.00407056	0.153292					pujana brca2 pcc network	414	0	0.0618252					gho atf5 targets dn	16	0	0.0107637	davicioni rhabdomyosarcoma pax foxo1 fusion dn	14	0.0248227	0.203712
rickman head and neck cancer e	83	0	0.150368					odonnell targets of myc and tfrc dn	45	0	0.0642553					bidus metastasis up	214	0	0.0108046	schlesinger methylated de novo in cancer	87	0.005291	0.203828
pid epo pathway	33	0.00116822	0.147565					kong e2f3 targets	95	0	0.0649592					reactome cell cycle	639	0	0.0107444	biocarta cytokine pathway	19	0.0196721	0.2059
pid cxcr4 pathway	101	0.00103093	0.147897					dacosta uv response via ercc3 dn	836	0	0.0637388					shedden lung cancer poor survival a6	448	0	0.0122355	minguez liver cancer vascular invasion dn	21	0.018315	0.204351
reactome formation of the early elongation complex	33	0	0.150632					terao aox4 targets hg up	27	0.00111483	0.0622902					reactome runx1 regulates transcription of genes involved in differentiation of hscs	128	0	0.0121179	park osteoblast differentiation by phenylamil up	10	0.0429448	0.212405
reactome darpp 32 events	23	0.00234192	0.154737					johnstone parvb targets 3 dn	819	0	0.0623405					reactome epigenetic regulation of gene expression	146	0	0.012465	mikkelsen mcv6 hcp with h3k27me3	422	0	0.213069
pid il8 cxcr2 pathway	34	0.00112486	0.157182					wakasugi have znf143 binding sites	60	0	0.0618004					lopez mesotelioma survival time up	14	0.00293255	0.0125236	hofmann myelodysplastic syndrom high risk dn	20	0.0337079	0.21801
tarte plasma cell vs b lymphocyte dn	38	0	0.154371					yao temporal response to progesterone cluster 13	159	0	0.0638565					reactome cellular senescence	192	0	0.0132438	martens tretinoin response up	803	0	0.217134
nagashima nrg1 signaling dn	52	0.00215517	0.155787					reactome nonsense mediated decay nmd	115	0	0.0635902					reactome cell cycle mitotic	535	0	0.0134584	chassot skin wound	11	0.0385757	0.221469
reactome mrna capping	29	0.00228571	0.153796					kim mycl1 amplification targets dn	19	0	0.0623985					rodrigues thyroid carcinoma poorly differentiated up	623	0	0.013643	rickman head and neck cancer f	54	0.004329	0.220342
mikkelsen es icp with h3k27me3	40	0.00221729	0.152084					kauffmann melanoma relapse up	60	0	0.0619419					reactome m phase	391	0	0.0138158	reactome shc1 events in erbb4 signaling	14	0.0280702	0.230773
stein esrra targets	510	0	0.15285					biocarta hivnef pathway	56	0	0.0616227					mori large pre bii lymphocyte up	84	0	0.013811	ebauer targets of pax3 foxo1 fusion up	191	0	0.232566
biocarta met pathway	33	0.00224719	0.151724					boyault liver cancer subclass g3 up	190	0	0.0606957					weber methylated icp in fibroblast	22	0.00138889	0.0157727	wang tnf targets	24	0.0204082	0.231234
reactome activation of gene expression by srebf srebp	42	0.00110132	0.14961					thum mir21 targets heart disease dn	9	0.00130548	0.0612304					ren bound by e2f	61	0	0.0174259	reactome defensins	49	0.0138249	0.230545
hsiao housekeeping genes	385	0	0.149087					fischer g2 m cell cycle	233	0	0.0602496					reactome amyloid fiber formation	107	0	0.0172906	su kidney	15	0.0264901	0.229203
li prostate cancer epigenetic	32	0.00113379	0.147014					cheok response to hd mtx dn	21	0	0.0608471					manalo hypoxia dn	288	0	0.017359	reactome adrenoceptors	9	0.0349854	0.232361
kim mycl1 amplification targets dn	19	0.00476758	0.145384					diaz chronic meylogenous leukemia up	1374	0	0.0600538					chemnitz response to prostaglandin e2 up	139	0	0.0201074	martinelli immature neutrophil dn	13	0.0356083	0.232312
zhan multiple myeloma hp dn	46	0.00439078	0.144126					nuytten ezh2 targets dn	990	0	0.0624657					weber methylated icp in sperm up	7	0	0.0205785	reactome acrosome reaction and sperm:oocyte membrane binding	6	0.0369318	0.234887
biocarta keratinocyte pathway	46	0	0.13872					reactome trna processing	106	0	0.0617427					pujana brca centered network	118	0	0.0234799	biocarta th1th2 pathway	21	0.032491	0.236635
reactome trna processing	106	0	0.143353					lindgren bladder cancer with loh in chr9q	114	0	0.0612527					pujana chek2 pcc network	746	0	0.0239692	wang neoplastic transformation by ccnd1 myc	21	0.0162602	0.235789
onken uveal melanoma dn	514	0	0.143468					slebos head and neck cancer with hpv up	74	0	0.0634075					reactome base excision repair	91	0	0.0246813	reactome collagen degradation	64	0.0103627	0.234871
bacolod resistance to alkylating agents up	23	0.00116414	0.141697					lastowska neuroblastoma copy number dn	765	0	0.0629057					reactome rho gtpases activate formins	138	0	0.0251688	reactome o glycosylation of tsr domain containing proteins	39	0.0205761	0.235694
sansom apc myc targets	232	0	0.141466					missiaglia regulated by methylation dn	117	0	0.0619897					wang response to gsk3 inhibitor sb216763 dn	353	0	0.0253888	reactome dectin 2 family	26	0.0114504	0.235113
pid il2 1pathway	55	0.0021164	0.145384					shedden lung cancer poor survival a6	448	0	0.0613299					pujana xprss int network	166	0	0.0257187	sasson fsh response	9	0.0380952	0.234719
reactome signaling by ntrk1 trka	78	0	0.14438					mikkelsen es hcp with h3k27me3	39	0.00108578	0.0611566					borczuk malignant mesothelioma up	304	0	0.0269024	reactome antimicrobial peptides	94	0.005	0.234023
pyeon cancer head and neck vs cervical up	182	0	0.142566					odonnell tfrc targets dn	125	0	0.0604982					finetti breast cancer kinome red	16	0.00141443	0.0270228	reactome gaba receptor activation	55	0.0254237	0.233863
reactome reactions specific to the complex n glycan synthesis pathway	10	0.00532623	0.141248					reactome mitotic prometaphase	198	0	0.0610258					chiang liver cancer subclass proliferation up	175	0	0.0269053	boquest stem cell cultured vs fresh dn	30	0.032967	0.241395
stein esrra targets dn	99	0	0.140143					reactome aurka activation by tpx2	72	0	0.0604502					reactome highly calcium permeable postsynaptic nicotinic acetylcholine receptors	11	0	0.0276931	kegg hematopoietic cell lineage	85	0	0.24958
amit serum response 120 mcf10a	65	0.00106724	0.139642					reactome srp dependent cotranslational protein targeting to membrane	112	0	0.059876					kegg ascorbate and aldarate metabolism	25	0.00137552	0.0275074	tesar jak targets mouse es d3 dn	9	0.0350877	0.248983
ramalho stemness up	194	0	0.138315					reactome anchoring of the basal body to the plasma membrane	96	0	0.0602123					kegg cell cycle	124	0	0.0273746
reactome aurka activation by tpx2	72	0.0010395	0.141161					mori plasma cell up	49	0	0.0610078					schlosser myc targets repressed by serum	157	0	0.027237
reactome centrosome maturation	81	0	0.140672					reactome sumoylation of transcription cofactors	42	0.00108342	0.0601895					kinsey targets of ewsr1 flii fusion up	1254	0	0.0295849
cromer metastasis up	71	0.00319149	0.139357					gobert oligodendrocyte differentiation up	555	0	0.0598788					ohashi aurkb targets	9	0.00293255	0.029938
reactome transcription of the hiv genome	73	0.00105263	0.140641					reactome hiv infection	234	0	0.0600976					reactome trna aminoacylation	42	0	0.0298258
pid s1p meta pathway	21	0.00350467	0.141104					nick response to proc treatment dn	24	0.0022779	0.0597967					chiang liver cancer subclass unannotated dn	191	0	0.0305722
kegg non small cell lung cancer	54	0	0.144453					kegg non small cell lung cancer	54	0	0.0596818					grade colon and rectal cancer up	288	0	0.0316035
reactome e2f mediated regulation of dna replication	22	0.00464037	0.144739					reactome metabolism of rna	660	0	0.0590689					wu apoptosis by cdkn1a via tp53	51	0.00123762	0.0325915
pujana xprss int network	166	0	0.144994					pid hiv nef pathway	35	0.0010929	0.0590465					reactome mitotic prometaphase	198	0	0.0337975
liu cdx2 targets dn	8	0.00979021	0.143792					toyota targets of mir34b and mir34c	428	0	0.0584574					west adrenocortical tumor up	294	0	0.0335813
pid vegfr1 2 pathway	69	0	0.142757					reactome hiv life cycle	152	0	0.0578825					rhodes undifferentiated cancer	68	0.00123001	0.0347546
flechner biopsy kidney transplant ok vs donor up	558	0	0.142825					dutertre estradiol response 24hr up	318	0	0.0576177					shen smarca2 targets up	418	0	0.0353752
biocarta tpo pathway	24	0.00354191	0.141674					reactome nucleotide excision repair	110	0	0.0583514					kegg pentose and glucuronate interconversions	28	0.0013624	0.0354744
reactome p130cas linkage to mapk signaling for integrins	15	0.0025	0.141241					nakamura cancer microenvironment dn	45	0.00106838	0.0577111					johnstone parvb targets 3 dn	819	0	0.0356574
lindgren bladder cancer with loh in chr9q	114	0	0.141153					reactome eukaryotic translation initiation	119	0	0.0571484					reactome estrogen dependent gene expression	148	0	0.0354098
osman bladder cancer up	383	0	0.140591					osman bladder cancer up	383	0	0.0578852					bacolod resistance to alkylating agents dn	52	0	0.0369683
wamunyokoli ovarian cancer lmp up	266	0	0.139861					reactome glucuronidation	25	0.00114025	0.0580964					kamminga ezh2 targets	41	0.0013089	0.0385312
reactome influenza infection	155	0.00101112	0.140554					reactome formation of incision complex in gg ner	43	0.00106724	0.0577825					furukawa dusp6 targets pci35 dn	69	0.00125786	0.0403073
diaz chronic meylogenous leukemia up	1374	0	0.138734					pid retinoic acid pathway	30	0	0.057789					reactome mitotic metaphase and anaphase	201	0	0.0412712
jiang hypoxia normal	199	0	0.13927					bidus metastasis up	214	0	0.0571699					wong embryonic stem cell core	330	0	0.0414518
reactome grb2:sos provides linkage to mapk signaling for integrins	15	0.0123916	0.13989					reactome n glycan antennae elongation in the medial trans golgi	26	0.003367	0.0568163					boyault liver cancer subclass g23 up	53	0.00131406	0.0418596
reactome hiv life cycle	152	0.0010101	0.139449					pid p53 regulation pathway	58	0	0.0581578					stein esrra targets responsive to estrogen dn	41	0	0.0418666
mikkelsen ips with hcp h3k27me3	101	0	0.138944					wong embryonic stem cell core	330	0	0.0578349					tarte plasma cell vs plasmablast dn	303	0	0.042144
lastowska neuroblastoma copy number dn	765	0	0.137827					reactome signaling by ras mutants	58	0.00104603	0.0573417					kegg porphyrin and chlorophyll metabolism	41	0.00263852	0.0431018
reactome formation of hiv elongation complex in the absence of hiv tat	48	0.00325733	0.138952					reactome mrna capping	29	0.00227273	0.0572322					reactome metalloprotease dubs	35	0.00265604	0.0442949
reactome fgfr2 alternative splicing	27	0.00460299	0.140837					mitsiades response to aplidin dn	246	0	0.0579597					basaki ybx1 targets up	280	0	0.0444486
zhang response to ikk inhibitor and tnf dn	102	0.00103734	0.147524					pujana breast cancer lit int network	101	0	0.0576412					mori plasma cell up	49	0	0.0453735
biocarta il6 pathway	21	0.00847458	0.147146					pid erbb1 receptor proximal pathway	35	0.00110497	0.0574145					acevedo liver tumor vs normal adjacent tissue up	844	0	0.0461299
su placenta	28	0.00234192	0.147836					wamunyokoli ovarian cancer lmp up	266	0	0.0568556					patil liver cancer	649	0	0.0477407
reactome nonsense mediated decay nmd	115	0	0.14752					kegg porphyrin and chlorophyll metabolism	41	0	0.0574846					reactome dna double strand break repair	164	0	0.0488265
biocarta il3 pathway	15	0.00871731	0.146348					gale apl with flt3 mutated up	57	0	0.058092					naderi breast cancer prognosis up	51	0.00383632	0.0492035
kegg intestinal immune network for iga production	45	0.00323625	0.14604					reactome infectious disease	381	0	0.0578184					reactome homology directed repair	136	0	0.0492817
pid cxcr3 pathway	43	0	0.144846					reactome golgi associated vesicle biogenesis	56	0	0.057439					whitfield cell cycle g2	162	0	0.0544743
reactome signaling by the b cell receptor bcr	110	0	0.144658					pid hdac classi pathway	65	0	0.0574961					reactome glucuronidation	25	0.00535475	0.0545801
pid fak pathway	58	0.00211864	0.143499					kegg basal transcription factors	35	0.00109769	0.0573178					west adrenocortical tumor markers up	22	0.00556328	0.0545528
lindgren bladder cancer cluster 3 dn	220	0	0.145126					whitfield cell cycle g1 s	126	0	0.0572207					reactome sumoylation of chromatin organization proteins	71	0	0.0543156
hirsch cellular transformation signature dn	103	0.0020429	0.144655					reactome oncogenic mapk signaling	80	0	0.0574629					wang metastasis of breast cancer esr1 up	21	0.00969529	0.0544199
reactome signaling by vegf	105	0	0.144657					winnepenninckx melanoma metastasis up	159	0	0.0570504					kegg aminoacyl trna biosynthesis	41	0.00261438	0.0546721
reactome global genome nucleotide excision repair gg ner	84	0	0.145313					reactome sumoylation of dna methylation proteins	16	0.00474496	0.059384					li wilms tumor vs fetal kidney 1 dn	161	0	0.055097
reactome nucleotide excision repair	110	0	0.144632					reactome trna modification in the nucleus and cytosol	42	0	0.0602495					jeon smad6 targets dn	18	0.00562588	0.0560683
mili pseudopodia haptotaxis dn	658	0	0.143579					reactome influenza infection	155	0	0.0624642					dodd nasopharyngeal carcinoma dn	1328	0	0.0574423
nuytten nipp1 targets dn	826	0	0.143761					cairo hepatoblastoma classes up	594	0	0.0627457					reactome translation	292	0	0.058074
wang metastasis of breast cancer	14	0.00628141	0.142892					reactome rrna processing	200	0	0.0631924					le egr2 targets up	104	0	0.0586402
schlosser serum response augmented by myc	105	0.00205339	0.142874					whiteford pediatric cancer markers	115	0	0.0627414					reactome highly calcium permeable nicotinic acetylcholine receptors	9	0.00299401	0.060002
tonks targets of runx1 runx1t1 fusion granulocyte dn	17	0.0123153	0.142704					pujana breast cancer with brca1 mutated up	57	0	0.0630391					tien intestine probiotics 24hr up	549	0	0.0605036
reactome anchoring of the basal body to the plasma membrane	96	0.00104603	0.142022					reactome signaling by robo receptors	217	0	0.0636209					reactome fertilization	26	0.00269906	0.0603485
reactome intra golgi traffic	44	0.00433369	0.14177					reactome nonsense mediated decay nmd independent of the exon junction complex ejc	95	0	0.0639587					benporath cycling genes	633	0	0.0631094
jazaeri breast cancer brca1 vs brca2 dn	42	0.00218341	0.141514					reactome formation of the early elongation complex	33	0	0.0636706					farmer breast cancer cluster 7	20	0.00139082	0.0629773
huper breast basal vs luminal up	52	0	0.140629					stein esrra targets	510	0	0.0636697					vecchi gastric cancer early up	415	0	0.0628418
gryder pax3foxo1 top enhancers	429	0	0.140773					hoshida liver cancer subclass s2	114	0	0.0640581					mitsiades response to aplidin dn	246	0	0.0627283
wong embryonic stem cell core	330	0	0.141812					wang lmo4 targets up	334	0	0.0638774					olsson e2f3 targets dn	38	0.00390625	0.0643008
koinuma targets of smad2 or smad3	816	0	0.141023					dodd nasopharyngeal carcinoma dn	1328	0	0.0640757					tomlins metastasis dn	19	0.0042796	0.0643007
pid tcptp pathway	42	0.0043956	0.140577					mikkelsen ips icp with h3k27me3	54	0.00106838	0.0643036					kegg n glycan biosynthesis	46	0	0.0675187
thum mir21 targets heart disease dn	9	0.0078534	0.139961					meissner brain hcp with h3k4me2	18	0.00469484	0.0641914					reactome chromatin organization	270	0	0.0675868
stein esrra targets up	372	0	0.139138					reichert mitosis lin9 targets	27	0.00218818	0.0644058					pujana brca2 pcc network	414	0	0.068721
enk uv response keratinocyte dn	471	0	0.138734					acevedo liver tumor vs normal adjacent tissue up	844	0	0.0659007					mili pseudopodia haptotaxis up	490	0	0.0684218
rickman metastasis up	330	0	0.139233					reactome runx1 interacts with co factors whose precise effect on runx1 targets is not known	37	0.00218103	0.0661988					setlur prostate cancer tmprss2 erg fusion up	66	0.00247831	0.0683375
reactome synthesis of lipoxins lx	6	0.00423131	0.138599					marks hdac targets dn	15	0.00369004	0.0660837					nikolsky breast cancer 8p12 p11 amplicon	54	0.00374532	0.0680725
reactome raf activation	30	0.00345224	0.137914					west adrenocortical tumor up	294	0	0.0658765					chuang oxidative stress response dn	11	0.00585652	0.0680484
sabates colorectal adenoma up	134	0	0.139459					reactome cell cycle	639	0	0.067048					shaffer irf4 targets in activated b lymphocyte	78	0.00730816	0.0684309
reactome microrna mirna biogenesis	24	0.00811124	0.139282					georges targets of mir192 and mir215	863	0	0.0667981					nuytten ezh2 targets dn	990	0	0.0681792
benporath sox2 targets	715	0	0.138948					reactome activation of gene expression by srebf srebp	42	0.00106045	0.0674638					diaz chronic meylogenous leukemia up	1374	0	0.0685234
gryder pax3foxo1 enhancers in tads	991	0	0.138959					tien intestine probiotics 24hr up	549	0	0.0683699					kauffmann dna repair genes	225	0	0.0692499
gavin foxp3 targets cluster t7	94	0.00205973	0.138306					reactome cdc6 association with the orc:origin complex	11	0.00376412	0.0683199					reactome copi dependent golgi to er retrograde traffic	98	0	0.070229
li wilms tumor vs fetal kidney 1 up	180	0	0.137633					pid igf1 pathway	29	0.00442478	0.0686079					reactome interaction with cumulus cells and the zona pellucida	11	0.00725689	0.0770075
gary cd5 targets up	460	0	0.141591					elvidge hypoxia dn	145	0	0.0686762					reactome signaling by rho gtpases	448	0	0.0778442
chauhan response to methoxyestradiol dn	100	0.00207684	0.140927					pid ajdiss 2pathway	48	0.00106952	0.0690315					blum response to salirasib dn	333	0	0.0785007
kim bipolar disorder oligodendrocyte density corr up	663	0	0.14145					hsiao housekeeping genes	385	0	0.068604					pujana breast cancer lit int network	101	0.00120627	0.0785883
tien intestine probiotics 24hr dn	209	0	0.142232					gross hypoxia via elk3 up	202	0	0.0684521					frasor response to serm or fulvestrant dn	48	0	0.079202
lim mammary stem cell dn	405	0	0.144236					reactome regulation of tp53 activity	159	0	0.0684181					smid breast cancer relapse in liver dn	10	0.00732064	0.0797822
cheok response to hd mtx dn	21	0.00235571	0.145624					moreaux multiple myeloma by taci dn	170	0	0.0680254					zhang breast cancer progenitors up	415	0	0.0799811
wang lmo4 targets dn	345	0	0.145885					kauffmann dna repair genes	225	0	0.0675457					biocarta akapcentrosome pathway	14	0.0125	0.0799048
reactome generation of second messenger molecules	29	0.00908059	0.145314					tien intestine probiotics 24hr dn	209	0	0.0674904					cui glucose deprivation	60	0.00123457	0.0809211
pujana brca centered network	118	0	0.144568					gryder pax3foxo1 enhancers in tads	991	0	0.0683518					yao temporal response to progesterone cluster 17	178	0	0.0810573
kegg ribosome	86	0	0.144321					kinsey targets of ewsr1 flii fusion up	1254	0	0.0679655					martinez response to trabectedin dn	267	0	0.0820908
reactome nonsense mediated decay nmd independent of the exon junction complex ejc	95	0.00310238	0.14421					reactome signaling by moderate kinase activity braf mutants	45	0	0.0679431					petrova prox1 targets up	25	0.00560224	0.0837671
johnstone parvb targets 3 dn	819	0	0.143365					flechner biopsy kidney transplant ok vs donor up	558	0	0.0701893					fevr ctnnb1 targets dn	545	0	0.0837602
pujana breast cancer lit int network	101	0.00103627	0.142899					holleman prednisolone resistance all up	18	0.00238663	0.069751					osman bladder cancer up	383	0	0.0853398
wang tumor invasiveness up	350	0	0.142354					puiffe invasion inhibited by ascites dn	143	0	0.0693657					schuhmacher myc targets up	79	0	0.0850686
puiffe invasion inhibited by ascites dn	143	0.00101729	0.141057					lockwood amplified in lung cancer	210	0	0.0695457					rhein all glucocorticoid therapy dn	360	0	0.0855128
schlosser serum response dn	680	0	0.140558					biocarta atrbrca pathway	23	0.00228833	0.0702789					wei mycn targets with e box	780	0	0.087229
landemaine lung metastasis	21	0.00842359	0.139196					kim wt1 targets dn	462	0	0.0700136					graham cml quiescent vs normal quiescent up	93	0.00120919	0.0871798
jaeger metastasis dn	253	0	0.140739					reactome signaling by braf and raf fusions	64	0.00104275	0.069589					fournier acinar development late 2	280	0	0.0893597
krige response to tosedostat 24hr up	715	0	0.141738					rodrigues thyroid carcinoma poorly differentiated dn	742	0	0.0703282					biocarta g2 pathway	24	0.00273973	0.089486
kegg phosphatidylinositol signaling system	76	0.00315457	0.144322					fardin hypoxia 9	7	0.00135135	0.0708074					pilon klf1 targets dn	1959	0	0.0945627
biocarta nos1 pathway	21	0.00840336	0.14512					nouzova tretinoin and h4 acetylation	131	0.00100705	0.0713503					moreaux multiple myeloma by taci dn	170	0	0.096722
spielman lymphoblast european vs asian dn	583	0	0.146491					reactome homologous dna pairing and strand exchange	42	0	0.0709915					reactome cytosolic trna aminoacylation	24	0.0027933	0.0986036
reactome srp dependent cotranslational protein targeting to membrane	112	0	0.14623					pyeon hpv positive tumors up	89	0	0.0705928					reactome trna processing	106	0	0.0997712
reactome translation	292	0	0.145628					reactome mrna splicing	186	0	0.0703682					ruiz tnc targets dn	143	0	0.0993341
reactome asparagine n linked glycosylation	302	0	0.144953					gryder pax3foxo1 top enhancers	429	0	0.0700593					wilcox response to progesterone up	148	0	0.0990834
zheng il22 signaling up	56	0.00107875	0.144238					hahtola mycosis fungoides cd4 dn	109	0	0.0698098					berenjeno transformed by rhoa up	528	0	0.106373
osman bladder cancer dn	385	0	0.145117					pujana chek2 pcc network	746	0	0.0702752					udayakumar med1 targets up	129	0	0.107142
biocarta tcr pathway	44	0.00547645	0.144896					wang lmo4 targets dn	345	0	0.0699921					reactome acetylcholine binding and downstream events	14	0.00879765	0.107971
reactome transport to the golgi and subsequent modification	185	0	0.145923					sansom apc myc targets	232	0	0.0713415					concannon apoptosis by epoxomicin dn	169	0	0.108351
reactome host interactions of hiv factors	131	0	0.144906					mori immature b lymphocyte dn	89	0	0.0717305					lee bmp2 targets dn	865	0	0.108022
falvella smokers with lung cancer	79	0.00104384	0.145451					yao temporal response to progesterone cluster 14	138	0	0.0716237					reactome e3 ubiquitin ligases ubiquitinate target proteins	59	0.0037594	0.11016
biocarta eicosanoid pathway	22	0.00696056	0.146447					pid atr pathway	39	0.00325027	0.0712205					croonquist nras vs stromal stimulation dn	95	0.00232288	0.115081
reactome regulation of plk1 activity at g2 m transition	87	0.00103734	0.146881					onken uveal melanoma dn	514	0	0.0719702					su testis	79	0.00249688	0.114772
takeda targets of nup98 hoxa9 fusion 3d dn	30	0.00681818	0.147348					stein esrra targets dn	99	0	0.0725339					nakamura cancer microenvironment dn	45	0.0025974	0.114579
kang fluorouracil resistance dn	16	0.00736196	0.146984					osman bladder cancer dn	385	0	0.0721791					reactome mitochondrial translation	94	0	0.117538
reactome signalling to erks	32	0.0112867	0.146955					reactome signaling by vegf	105	0	0.0726081					mori pre bi lymphocyte up	79	0.00713436	0.118937
corre multiple myeloma up	66	0.00105708	0.146401					rickman metastasis up	330	0	0.0724941					reactome signaling by notch	232	0	0.122011
johnstone parvb targets 2 dn	326	0	0.14607					fevr ctnnb1 targets dn	545	0	0.0722202					whitfield cell cycle s	146	0	0.121741
boyault liver cancer subclass g3 up	190	0	0.14839					reactome rrna processing in the nucleus and cytosol	190	0	0.0725843					wong mitochondria gene module	204	0	0.125829
ly aging old up	7	0.00684931	0.147777					reactome formation of hiv elongation complex in the absence of hiv tat	48	0	0.0730013					reactome sumoylation	186	0	0.127886
gargalovic response to oxidized phospholipids grey dn	75	0.00105042	0.147312					kim hypoxia	19	0.002331	0.0726386					whitfield cell cycle g2 m	199	0	0.127882
acevedo liver tumor vs normal adjacent tissue up	844	0	0.147664					kim bipolar disorder oligodendrocyte density corr up	663	0	0.0729727					pid atr pathway	39	0.0078125	0.129879
kyng environmental stress response not by uv in old	23	0.00814901	0.14772					reactome regulation of expression of slits and robos	171	0	0.0731013					caffarel response to thc 24hr 5 up	31	0.0120643	0.129999
kegg gnrh signaling pathway	101	0.00102881	0.146745					bilanges serum and rapamycin sensitive genes	49	0	0.0734621					mori emu myc lymphoma by onset time up	107	0.00118203	0.130347
yao temporal response to progesterone cluster 10	67	0.00206612	0.146094					liao metastasis	516	0	0.0733761					garcia targets of fli1 and dax1 dn	161	0	0.131478
pid integrin cs pathway	26	0.00941176	0.146582					nuytten nipp1 targets dn	826	0	0.0737041					missiaglia regulated by methylation dn	117	0.00115741	0.131344
kaab failed heart atrium dn	145	0.00102041	0.149408					biocarta tall1 pathway	15	0.00369004	0.0738318					mori mature b lymphocyte dn	72	0.00630517	0.132695
stark prefrontal cortex 22q11 deletion dn	489	0	0.148764					enk uv response keratinocyte dn	471	0	0.0736853					kumamoto response to nutlin 3a dn	10	0.0181543	0.134863
kyng werner syndrom and normal aging dn	189	0	0.150098					pid plk1 pathway	46	0.00107181	0.0736272					acevedo liver cancer with h3k27me3 dn	207	0.00110865	0.135916
zhang breast cancer progenitors up	415	0	0.149409					rodrigues thyroid carcinoma poorly differentiated up	623	0	0.073386					reactome g1 s specific transcription	29	0.0068306	0.139403
krasnoselskaya ilf3 targets dn	46	0.0043956	0.149611					pid ar pathway	61	0	0.073308					mohankumar hoxa1 targets up	398	0	0.142002
reactome pi metabolism	83	0.00208986	0.148993					reactome activation of atr in response to replication stress	37	0.00328228	0.0734181					nikolsky breast cancer 8q23 q24 amplicon	152	0	0.142354
pid retinoic acid pathway	30	0.0134228	0.149833					lim mammary stem cell dn	405	0	0.0745743					hu genotoxic damage 4hr	35	0.013245	0.14249
pid fcer1 pathway	59	0.00213904	0.150296					ramaswamy metastasis up	64	0	0.0743913					stark prefrontal cortex 22q11 deletion dn	489	0	0.145444
yao temporal response to progesterone cluster 14	138	0	0.149816					benporath proliferation	145	0	0.074226					tien intestine probiotics 24hr dn	209	0	0.145724
reactome n glycan antennae elongation in the medial trans golgi	26	0.00810185	0.152493					cromer metastasis up	71	0	0.0738895					kegg glycosaminoglycan biosynthesis chondroitin sulfate	22	0.0170697	0.151469
rickman head and neck cancer c	107	0	0.152178					graham normal quiescent vs normal dividing dn	88	0.00101833	0.0737286					reactome e2f mediated regulation of dna replication	22	0.0180807	0.152508
mili pseudopodia chemotaxis dn	411	0	0.151827					theilgaard neutrophil at skin wound dn	224	0	0.0756834					liu sox4 targets dn	308	0	0.152555
hahtola mycosis fungoides cd4 dn	109	0	0.15142					gavin foxp3 targets cluster p6	90	0	0.0767297					reactome diseases associated with n glycosylation of proteins	17	0.0169972	0.154371
kim wt1 targets dn	462	0	0.151644					lee early t lymphocyte up	106	0.00101626	0.0764455					nikolsky breast cancer 11q12 q14 amplicon	155	0	0.15394
sengupta nasopharyngeal carcinoma with lmp1 dn	162	0	0.151245					stark prefrontal cortex 22q11 deletion dn	489	0	0.0762607					shepard bmyb targets	74	0.0037037	0.156405
pid pdgfrb pathway	129	0	0.151369					biocarta mcalpain pathway	19	0.0106132	0.0762602					scibetta kdm5b targets dn	78	0.00490196	0.155918
reactome recruitment of numa to mitotic centrosomes	94	0.00207254	0.151118					reactome spry regulation of fgf signaling	16	0.00242718	0.0759472					biocarta bcellsurvival pathway	15	0.0133136	0.155369
biocarta fmlp pathway	34	0.00786517	0.151167					biocarta toll pathway	25	0.00441501	0.0756171					biocarta plce pathway	11	0.0231884	0.160984
pid hdac classi pathway	65	0.00215285	0.150681					benporath cycling genes	633	0	0.0755544					xu hgf signaling not via akt1 48hr dn	18	0.0264993	0.16198
theilgaard neutrophil at skin wound dn	224	0	0.150015					martinez response to trabectedin dn	267	0	0.075458					reactome golgi to er retrograde transport	132	0.00232829	0.162562
rodrigues thyroid carcinoma poorly differentiated dn	742	0	0.149447					burton adipogenesis 3	100	0	0.0752262					ramalho stemness up	194	0	0.163173
reactome fcgamma receptor fcgr dependent phagocytosis	86	0.00103199	0.14943					nikolsky breast cancer 8p12 p11 amplicon	54	0.00422387	0.0759115					ly aging middle dn	15	0.0243553	0.163484
mcbryan pubertal breast 5 6wk dn	122	0.0010101	0.148831					sesto response to uv c4	20	0.00584112	0.0756408					kim wt1 targets dn	462	0	0.164276
vanoevelen myogenesis sin3a targets	214	0	0.148214					li wilms tumor vs fetal kidney 1 dn	161	0.0010101	0.0757101					dacosta uv response via ercc3 dn	836	0	0.16702
rickman tumor differentiated well vs poorly dn	372	0	0.147867					mathew fanconi anemia genes	11	0.0101394	0.0753755					reactome dna repair	329	0	0.16784
reactome organelle biogenesis and maintenance	276	0	0.148892					gary cd5 targets up	460	0	0.0751255					toyota targets of mir34b and mir34c	428	0	0.168606
reactome rna polymerase i transcription termination	31	0.00671892	0.149202					wakabayashi adipogenesis pparg rxra bound with h4k20me1 mark	143	0	0.0754674					pid e2f pathway	73	0.0110159	0.168577
boyault liver cancer subclass g1 up	111	0.00309917	0.148997					debiasi apoptosis by reovirus infection dn	267	0	0.0752238					spielman lymphoblast european vs asian up	469	0	0.168219
spielman lymphoblast european vs asian up	469	0	0.149679					kegg aminoacyl trna biosynthesis	41	0.00434783	0.0756186					gazda diamond blackfan anemia progenitor dn	64	0.00379747	0.168724
ginestier breast cancer znf217 amplified dn	317	0	0.149053					aguirre pancreatic cancer copy number up	289	0	0.0756863					wamunyokoli ovarian cancer grades 1 2 up	137	0.00230415	0.169812
tien intestine probiotics 24hr up	549	0	0.149545					smid breast cancer luminal a dn	18	0.00824499	0.0755289					vernell retinoblastoma pathway up	70	0.00746269	0.169836
reactome fc epsilon receptor fceri signaling	131	0	0.149429					aguirre pancreatic cancer copy number dn	231	0	0.0753499					dacosta uv response via ercc3 common dn	451	0	0.169495
valk aml cluster 15	30	0.0091954	0.14903					gary cd5 targets dn	425	0	0.0757931					bhati g2m arrest by 2methoxyestradiol up	110	0.0011534	0.171418
elvidge hypoxia by dmog up	132	0.00205128	0.148613					spielman lymphoblast european vs asian up	469	0	0.0756007					acevedo liver cancer up	951	0	0.173583
pid endothelin pathway	63	0.0042328	0.148209					lindgren bladder cancer cluster 3 up	322	0	0.0756943					yao temporal response to progesterone cluster 14	138	0.00114811	0.173117
kegg glioma	65	0.00421496	0.14764					schlosser serum response dn	680	0	0.0755857					biocarta rb pathway	13	0.0261628	0.174952
reactome vegfr2 mediated cell proliferation	19	0.00838323	0.147064					pid s1p s1p2 pathway	24	0.00570125	0.0756606					reactome sumoylation of dna replication proteins	46	0.015748	0.174506
reactome signaling by hedgehog	150	0	0.146603					kegg ascorbate and aldarate metabolism	25	0.00455063	0.0758297					kegg amino sugar and nucleotide sugar metabolism	43	0.0183486	0.176913
han satb1 targets up	413	0	0.146138					reactome selenoamino acid metabolism	117	0	0.0772184					lastowska neuroblastoma copy number dn	765	0	0.176546
georges targets of mir192 and mir215	863	0	0.145747					garcia targets of fli1 and dax1 dn	161	0.00100503	0.0773331					doane breast cancer classes up	67	0.00967352	0.176745
reactome regulation of ras by gaps	68	0	0.145902					lee bmp2 targets dn	865	0	0.0770872					gary cd5 targets dn	425	0	0.176687
pujana brca2 pcc network	414	0	0.145665					bystrykh hematopoiesis stem cell fgf3	6	0.00852273	0.0774974					gargalovic response to oxidized phospholipids turquoise dn	55	0.0075662	0.177692
liu sox4 targets dn	308	0	0.146016					mori emu myc lymphoma by onset time up	107	0	0.0773331					hamai apoptosis via trail up	643	0	0.179157
wakabayashi adipogenesis pparg rxra bound with h4k20me1 mark	143	0	0.146669					dazard uv response cluster g6	139	0	0.0772051					reactome metabolism of nucleotides	99	0.00704225	0.180335
reactome glucuronidation	25	0.0148912	0.146518					vanoevelen myogenesis sin3a targets	214	0	0.0771829					schlosser myc targets and serum response dn	48	0.00779221	0.179765
figueroa aml methylation cluster 6 up	134	0	0.147259					pujana brca1 pcc network	1567	0	0.0775168					nikolsky breast cancer 19q13.1 amplicon	21	0.0238764	0.180767
faelt b cll with vh3 21 dn	49	0.0118153	0.147055					li wilms tumor vs fetal kidney 1 up	180	0	0.077939					georges targets of mir192 and mir215	863	0	0.181994
reactome signaling by ntrks	99	0.00102669	0.146897					patil liver cancer	649	0	0.0783486					bohn primary immunodeficiency syndrom up	45	0.0147239	0.181821
ginestier breast cancer 20q13 amplification dn	167	0	0.146634					reactome mitochondrial translation	94	0	0.0784078					johnstone parvb targets 2 dn	326	0	0.181447
mullighan mll signature 2 up	412	0	0.146706					manalo hypoxia dn	288	0	0.078616					hsiao housekeeping genes	385	0	0.181513
de yy1 targets dn	90	0.00312826	0.146184					mcbryan pubertal breast 5 6wk dn	122	0	0.0789806					casorelli acute promyelocytic leukemia dn	654	0	0.181188
valk aml cluster 9	34	0.0133038	0.14609					gryder pax3foxo1 enhancers ko down	430	0	0.0788085					reactome anchoring of the basal body to the plasma membrane	96	0.00708383	0.181589
rickman metastasis dn	249	0	0.145679					reactome resolution of ap sites via the multiple nucleotide patch replacement pathway	25	0.00701754	0.0805202					le neuronal differentiation dn	18	0.0327635	0.183757
benporath oct4 targets	285	0	0.145904					mili pseudopodia haptotaxis up	490	0	0.0804688					johansson brain cancer early vs late up	8	0.0168196	0.183909
biocarta vdr pathway	24	0.0127907	0.145568					noushmehr gbm germline mutated	7	0.00544218	0.0803511					reactome polo like kinase mediated events	16	0.0272206	0.186908
aguirre pancreatic cancer copy number up	289	0	0.145362					chandran metastasis up	188	0	0.0810355					reactome selenoamino acid metabolism	117	0.004662	0.190073
reactome regulation of runx3 expression and activity	55	0.00971922	0.145137					wilcox response to progesterone up	148	0	0.0807429					reactome protein ubiquitination	79	0.00981595	0.189697
ren alveolar rhabdomyosarcoma dn	402	0	0.144984					johnstone parvb targets 2 dn	326	0	0.0806463					hahtola mycosis fungoides cd4 dn	109	0.0011534	0.191532
baelde diabetic nephropathy dn	423	0	0.146563					kegg spliceosome	126	0	0.0811978					ding lung cancer expression by copy number	100	0.00472813	0.194414
klein primary effusion lymphoma dn	55	0.00321888	0.14601					fujii ybx1 targets dn	190	0	0.0814635					pujana breast cancer with brca1 mutated up	57	0.0112219	0.19612
reactome ephb mediated forward signaling	42	0.00333704	0.145981					marson bound by foxp3 stimulated	954	0	0.0812755					reactome regulation of gene expression in beta cells	21	0.0210674	0.196486
de yy1 targets up	19	0.0123916	0.145596					pal prmt5 targets up	191	0	0.0812836					reactome regulation of expression of slits and robos	171	0.00112233	0.195925
marks hdac targets dn	15	0.015	0.145299					zhang adipogenesis by bmp7	14	0.00367647	0.0816052					kegg retinol metabolism	64	0.0112219	0.195972
kegg chronic myeloid leukemia	73	0.00209424	0.14516					chin breast cancer copy number dn	12	0.0102041	0.0813715					krige response to tosedostat 24hr dn	980	0	0.198623
kim all disorders oligodendrocyte number corr up	743	0	0.144795					bredemeyer rag signaling not via atm dn	56	0.00210748	0.0813432					sharma pilocytic astrocytoma location dn	7	0.0202808	0.199698
biocarta cdmac pathway	16	0.0110429	0.144903					ly aging middle dn	15	0.0133495	0.0811283					zhang response to cantharidin dn	63	0.00738916	0.200694
biocarta erk pathway	27	0.00676437	0.144787					biocarta akapcentrosome pathway	14	0.00496894	0.0809822					reactome nuclear envelope breakdown	53	0.0142487	0.201248
kegg ascorbate and aldarate metabolism	25	0.00925926	0.144755					pid e2f pathway	73	0.00103413	0.0807781					yao temporal response to progesterone cluster 13	159	0.0010989	0.201313
reactome transcriptional regulation by runx3	95	0.00103093	0.146144					pid gmcsf pathway	36	0.0021978	0.0810985					meinhold ovarian cancer low grade dn	18	0.0299572	0.202639
reactome signaling by robo receptors	217	0	0.146544					jiang hypoxia normal	199	0	0.0808994					nouzova tretinoin and h4 acetylation	131	0.00347222	0.202559
sig bcr signaling pathway	46	0.00653595	0.146283					mellman tut1 targets up	20	0.0114811	0.0807215					pid foxm1 pathway	40	0.0232258	0.203187
watanabe rectal cancer radiotherapy responsive dn	91	0.00518672	0.145778					whitfield cell cycle g2	162	0	0.0805952					gabriely mir21 targets	285	0	0.204977
coates macrophage m1 vs m2 dn	75	0.0062435	0.145557					biocarta vdr pathway	24	0.00922722	0.0805438					reactome apc cdc20 mediated degradation of nek2a	25	0.0396175	0.204598
goldrath immune memory	63	0.00425985	0.145163					acevedo liver cancer up	951	0	0.0803226					ouellet ovarian cancer invasive vs lmp up	113	0.00706714	0.204202
shin b cell lymphoma cluster 9	19	0.00738007	0.14508					riz erythroid differentiation	80	0.00102881	0.0804836					reactome s phase	161	0.00113895	0.203585
bhat esr1 targets via akt1 dn	79	0.00311526	0.14539					pid bard1 pathway	29	0.00563063	0.0805554					smith liver cancer	47	0.0187166	0.20407
nuytten ezh2 targets dn	990	0	0.145457					elvidge hif1a targets up	66	0.00104167	0.0802832					biocarta dream pathway	13	0.039604	0.206425
oishi cholangioma stem cell like up	336	0	0.145397					spielman lymphoblast european vs asian dn	583	0	0.0804771					rodrigues thyroid carcinoma anaplastic up	695	0	0.207097
haslinger b cll with 13q14 deletion	24	0.0142012	0.145924					kenny ctnnb1 targets up	49	0.0042508	0.0804911					charafe breast cancer luminal vs basal up	369	0	0.208346
basso cd40 signaling up	101	0.00307377	0.145795					benporath sox2 targets	715	0	0.0808903					reactome signaling by nodal	20	0.0264317	0.208878
gryder pax3foxo1 enhancers ko down	430	0	0.145829					liu sox4 targets dn	308	0	0.0812185					lockwood amplified in lung cancer	210	0	0.209215
marson bound by foxp3 unstimulated	1159	0	0.145498					kegg valine leucine and isoleucine degradation	43	0.00431499	0.0812036					biocarta dnafragment pathway	10	0.0235988	0.208699
kegg asthma	28	0.0115875	0.14524					mili pseudopodia haptotaxis dn	658	0	0.0809125					biocarta plk3 pathway	8	0.0286576	0.208411
sesto response to uv c2	53	0.0107181	0.145167					krasnoselskaya ilf3 targets dn	46	0.00536481	0.0810887					reactome amine ligand binding receptors	42	0.0182529	0.209512
dodd nasopharyngeal carcinoma dn	1328	0	0.144704					kyng werner syndrom and normal aging dn	189	0	0.0810524					yao temporal response to progesterone cluster 11	98	0.0132053	0.209578
slebos head and neck cancer with hpv up	74	0.00418848	0.144644					bacolod resistance to alkylating agents up	23	0.00456621	0.0813487					biocarta cdc25 pathway	9	0.0362538	0.209612
kegg renal cell carcinoma	70	0.00105374	0.144267					zhang response to ikk inhibitor and tnf dn	102	0	0.081448					reactome resolution of d loop structures through synthesis dependent strand annealing sdsa	26	0.023224	0.209363
holleman vincristine resistance b all dn	16	0.0100883	0.144232					benporath es 2	40	0.00217865	0.0819281					yao temporal response to progesterone cluster 15	33	0.0204918	0.21138
biocarta akap95 pathway	11	0.012285	0.144017					marson bound by foxp3 unstimulated	1159	0	0.0830154					reactome srp dependent cotranslational protein targeting to membrane	112	0.00474496	0.211152
benporath nanog targets	964	0	0.14391					krige response to tosedostat 6hr up	874	0	0.0829327					biocarta akap95 pathway	11	0.032641	0.212604
scibetta kdm5b targets up	19	0.0170524	0.145494					kegg acute myeloid leukemia	57	0.00314136	0.0831809					shaffer irf4 targets in myeloma vs mature b lymphocyte	99	0.00590319	0.212145
wakabayashi adipogenesis pparg bound 36hr	29	0.0160367	0.145612					pid vegfr1 2 pathway	69	0.00208986	0.0831237					reactome sumoylation of dna damage response and repair proteins	77	0.00979192	0.214496
reactome scavenging of heme from plasma	13	0.0116129	0.145457					biocarta creb pathway	22	0.00687285	0.0833081					reactome muscarinic acetylcholine receptors	5	0.0278638	0.216218
odonnell targets of myc and tfrc up	75	0.00528541	0.145003					reactome regulation of tp53 activity through phosphorylation	92	0.00409417	0.0832972					ferreira ewings sarcoma unstable vs stable up	160	0.0011274	0.218096
yao temporal response to progesterone cluster 12	77	0.00417973	0.145384					reactome cilium assembly	200	0	0.0830646					biocarta mitochondria pathway	19	0.0386819	0.218513
reactome regulation of glycolysis by fructose 2 6 bisphosphate metabolism	12	0.0113065	0.145174					oishi cholangioma stem cell like up	336	0	0.0834185					kegg glycine serine and threonine metabolism	31	0.0336022	0.218152
fardin hypoxia 11	32	0.0137773	0.144818					biocarta keratinocyte pathway	46	0.00530223	0.0852309					semba fhit targets dn	9	0.0442338	0.217621
kegg retinol metabolism	64	0.00530786	0.144379					fischer g1 s cell cycle	195	0	0.0851076					reactome olfactory signaling pathway	369	0	0.21735
reactome signaling by braf and raf fusions	64	0.00749465	0.14415					schlosser serum response augmented by myc	105	0.00101937	0.0851687					biocarta mpr pathway	21	0.0277008	0.217965
acevedo liver cancer up	951	0	0.144357					reactome organelle biogenesis and maintenance	276	0	0.0850323					smid breast cancer luminal a dn	18	0.0377095	0.218866
monnier postradiation tumor escape up	387	0	0.144492					breuhahn growth factor signaling in liver cancer	23	0.00581395	0.084746					gentile uv response cluster d4	53	0.0113924	0.218618
reactome mrna splicing	186	0	0.144331					kegg chronic myeloid leukemia	73	0.00103842	0.084479					reactome rrna processing in the nucleus and cytosol	190	0.00219539	0.218218
buytaert photodynamic therapy stress up	806	0	0.14421					hoffmann large to small pre bii lymphocyte up	149	0	0.0842558					reactome transcription of e2f targets under negative control by dream complex	19	0.0306569	0.218073
shin b cell lymphoma cluster 1	13	0.0114796	0.145104					whitfield cell cycle literature	42	0.00425985	0.0855342					mikkelsen dedifferentiated state up	8	0.0247295	0.218394
liao metastasis	516	0	0.144769					pid cxcr4 pathway	101	0.00101937	0.0859905					kegg olfactory transduction	359	0.00103627	0.219656
kegg spliceosome	126	0	0.144633					schlosser myc targets and serum response up	46	0.00644468	0.0857333					reactome hiv life cycle	152	0.0033557	0.220309
verhaak glioblastoma classical	157	0	0.144242					lindgren bladder cancer cluster 3 dn	220	0	0.0860725					reactome rrna processing	200	0	0.219881
shi sparc targets up	23	0.0177725	0.143965					pid met pathway	79	0.00203459	0.0872629					reactome aurka activation by tpx2	72	0.0162095	0.221342
reactome pten regulation	138	0.00102145	0.143754					wang metastasis of breast cancer	14	0.0134639	0.0873937					benporath es 1	375	0	0.221988
pid p38 alpha beta pathway	30	0.014756	0.144227					pid fcer1 pathway	59	0.0021097	0.0875747					reactome trna processing in the nucleus	57	0.0194553	0.224583
chng multiple myeloma hyperploid dn	30	0.0125142	0.146747					stein esrra targets up	372	0	0.0875234					whitfield cell cycle m g1	127	0.0023015	0.224308
kim wt1 targets 12hr dn	209	0	0.146194					reactome hdr through single strand annealing ssa	37	0.00863931	0.0880155					wang lmo4 targets dn	345	0	0.223964
tonks targets of runx1 runx1t1 fusion hsc dn	187	0	0.145865					kim all disorders oligodendrocyte number corr up	743	0	0.0880071					lindgren bladder cancer with loh in chr9q	114	0.00824499	0.224985
marson bound by foxp3 stimulated	954	0	0.147212					reactome bh3 only proteins associate with and inactivate anti apoptotic bcl 2 members	9	0.011734	0.0878848					choi atl stage predictor	41	0.0210526	0.22444
reactome scf skp2 mediated degradation of p27 p21	60	0.00643777	0.147844					reactome e2f mediated regulation of dna replication	22	0.00810185	0.0876265					li dcp2 bound mrna	86	0.0144753	0.230564
villanueva liver cancer krt19 up	174	0.00100402	0.147456					reactome processing of capped intron containing pre mrna	240	0	0.088243					reichert g1s regulators as pi3k targets	8	0.0258359	0.230577
toyota targets of mir34b and mir34c	428	0	0.147628					rodrigues thyroid carcinoma anaplastic up	695	0	0.0880422					liang silenced by methylation dn	11	0.0338733	0.231042
cromer metastasis dn	75	0.00522466	0.147334					pid txa2pathway	56	0.00314795	0.0877735					reactome golgi associated vesicle biogenesis	56	0.0167742	0.232213
yagi aml relapse prognosis	34	0.00782123	0.146985					ginestier breast cancer 20q13 amplification dn	167	0	0.0881901					reactome nonsense mediated decay nmd	115	0.00928074	0.233532
biocarta fcer1 pathway	39	0.00782998	0.14723					reactome hdr through homologous recombination hrr	67	0.00103627	0.0881387					reactome interconversion of nucleotide di and triphosphates	29	0.0312076	0.234414
cairo hepatoblastoma classes up	594	0	0.147341					krige response to tosedostat 24hr up	715	0	0.0880387					villanueva liver cancer krt19 up	174	0.00768386	0.234389
dacosta uv response via ercc3 up	307	0	0.147094					li amplified in lung cancer	180	0	0.0877668					gross hypoxia via hif1a up	73	0.0160099	0.236465
pid igf1 pathway	29	0.0213964	0.147159					pid cdc42 reg pathway	30	0.0100334	0.0883048					mayburd response to l663536 up	26	0.0379919	0.236098
senese hdac3 targets dn	511	0	0.146864					reactome resolution of sister chromatid cohesion	125	0	0.0882021					pramoonjago sox4 targets dn	47	0.0219638	0.236584
schraets mll targets up	30	0.0114416	0.146868					ivanova hematopoiesis early progenitor	430	0	0.0884354					kannan tp53 targets dn	22	0.0343407	0.238443
reactome dectin 1 mediated noncanonical nf kb signaling	62	0.00539957	0.146894					pujana atm pcc network	1341	0	0.0902784					pid bard1 pathway	29	0.0289655	0.238213
krige response to tosedostat 6hr dn	890	0	0.146639					wakabayashi adipogenesis pparg bound 36hr	29	0.0113636	0.0907829					dang myc targets up	128	0.00803674	0.238218
lee bmp2 targets dn	865	0	0.146549					dacosta uv response via ercc3 up	307	0	0.0916743					mattioli multiple myeloma subgroups	17	0.0316092	0.240707
winter hypoxia dn	48	0.00979325	0.146425					reactome myd88 cascade initiated on plasma membrane	84	0.00307062	0.09148					reactome rna polymerase ii pre transcription events	84	0.0107143	0.241581
wakabayashi adipogenesis pparg bound 8d	615	0	0.146427					laiho colorectal cancer serrated dn	83	0	0.0920235					browne hcmv infection 2hr dn	47	0.0206986	0.242387
pid p53 downstream pathway	136	0	0.146					whitfield cell cycle g2 m	199	0	0.0920033					ozen mir125b1 targets	22	0.0345782	0.242696
moreaux multiple myeloma by taci dn	170	0	0.146097					figueroa aml methylation cluster 6 up	134	0	0.0921441					reactome cdc6 association with the orc:origin complex	11	0.0387481	0.242462
dutertre estradiol response 24hr dn	498	0	0.145837					reactome adherens junctions interactions	33	0.00657174	0.0921457					lindgren bladder cancer cluster 1 dn	372	0.00102987	0.244048
pid ephrinb rev pathway	30	0.0182648	0.145682					reactome transcription coupled nucleotide excision repair tc ner	78	0	0.0920878					reactome dna replication	127	0.00692841	0.244649
wang lmo4 targets up	334	0	0.145569					ivanova hematopoiesis intermediate progenitor	125	0	0.0924216					reactome transport and synthesis of paps	6	0.0366412	0.246415
reactome degradation of gli1 by the proteasome	60	0.00755124	0.146114					kang fluorouracil resistance dn	16	0.00976801	0.0924099					yu bap1 targets	29	0.0341064	0.245863
ivanova hematopoiesis early progenitor	430	0	0.145712					reactome respiratory electron transport atp synthesis by chemiosmotic coupling and heat production by uncoupling proteins	106	0.00101523	0.0923021					sharma pilocytic astrocytoma location up	27	0.0349933	0.249487
gross hypoxia via elk3 up	202	0	0.14545					reactome intrinsic pathway for apoptosis	50	0.00626959	0.0921111					smid breast cancer relapse in pleura up	6	0.0347003	0.249614
gozgit esr1 targets up	140	0.0010101	0.145193					streicher lsm1 targets up	45	0.00318134	0.0929786
fridman senescence up	74	0.00522466	0.145856					reactome toll like receptor tlr1:tlr2 cascade	97	0.00203874	0.092836
nick response to proc treatment dn	24	0.020979	0.1465					reactome toll like receptor 9 tlr9 cascade	95	0.00202634	0.0926851
fontaine thyroid tumor uncertain malignancy up	36	0.0133185	0.147542					nagashima nrg1 signaling dn	52	0.00530786	0.0924155
mikkelsen ips lcp with h3k27me3	10	0.0235294	0.147657					reactome pka mediated phosphorylation of key metabolic factors	5	0.00718391	0.0925021
reactome mitochondrial translation	94	0.00626305	0.148051					blum response to salirasib dn	333	0	0.0930666
pid ar nongenomic pathway	31	0.0192963	0.14885					burton adipogenesis peak at 24hr	44	0.00216685	0.0929197
kegg b cell receptor signaling pathway	75	0.00106952	0.148437					koyama sema3b targets dn	341	0	0.0952571
reactome synaptic adhesion like molecules	21	0.0117233	0.148257					cairo hepatoblastoma up	202	0	0.0950957
fardin hypoxia 9	7	0.0134048	0.148042					biocarta biopeptides pathway	29	0.0132743	0.0950047
reactome mitochondrial biogenesis	76	0.00419727	0.147942					stearman lung cancer early vs late up	124	0.00101937	0.0948901
stearman lung cancer early vs late up	124	0.00307377	0.148529					georges cell cycle mir192 targets	58	0.00630252	0.0946204
biocarta gpcr pathway	30	0.00931316	0.148723					reactome cyclin a b1 b2 associated events during g2 m transition	25	0.0112108	0.0959553
reactome miscellaneous substrates	12	0.0229592	0.148802					monnier postradiation tumor escape up	387	0	0.0957644
maina vhl targets dn	15	0.0186104	0.148797					boyault liver cancer subclass g1 up	111	0	0.0955035
hoshida liver cancer subclass s2	114	0.00101937	0.148619					wang clim2 targets dn	175	0	0.0950538
chung blister cytotoxicity dn	44	0.00541126	0.148487					vecchi gastric cancer early up	415	0	0.0951738
reactome regulation of lipid metabolism by peroxisome proliferator activated receptor alpha pparalpha	119	0.00102041	0.148151					reactome trna aminoacylation	42	0.00214592	0.0950019
berenjeno transformed by rhoa dn	376	0	0.147953					pid ncadherin pathway	33	0.003367	0.0952351
chandran metastasis up	188	0	0.147874					buckanovich t lymphocyte homing on tumor dn	19	0.00580046	0.0950143
bernard ppapdc1b targets dn	55	0.0063358	0.147795					koinuma targets of smad2 or smad3	816	0	0.094826
breuhahn growth factor signaling in liver cancer	23	0.0236407	0.14757					kasler hdac7 targets 1 up	184	0	0.0945957
charafe breast cancer luminal vs mesenchymal up	436	0	0.147691					reactome chromatin organization	270	0	0.0944239
debiasi apoptosis by reovirus infection up	293	0	0.147811					reactome host interactions of hiv factors	131	0.00101215	0.0951001
nouzova tretinoin and h4 acetylation	131	0.00305499	0.147495					lindgren bladder cancer cluster 1 up	112	0	0.0950908
biocarta bcr pathway	33	0.0136986	0.147572					zhou tnf signaling 4hr	52	0.00634921	0.0950301
wakabayashi adipogenesis pparg rxra bound 8d	820	0	0.147177					moreaux b lymphocyte maturation by taci dn	75	0.0030896	0.0949104
mootha pgc	411	0	0.146934					reactome pcna dependent long patch base excision repair	21	0.0104895	0.0950571
blalock alzheimers disease dn	1217	0	0.146797					reactome mitochondrial biogenesis	76	0.00103306	0.0951551
murakami uv response 6hr up	32	0.0103211	0.147092					reactome m phase	391	0	0.0950781
reactome spry regulation of fgf signaling	16	0.0196078	0.146977					chauhan response to methoxyestradiol dn	100	0.00101523	0.0952516
buckanovich t lymphocyte homing on tumor dn	19	0.0107271	0.14702					reactome diseases of immune system	24	0.00814901	0.0956425
reactome signaling by fgfr2	73	0.00422387	0.146633					zhan multiple myeloma pr up	46	0.0021254	0.0956656
patil liver cancer	649	0	0.146614					pid cxcr3 pathway	43	0.00537634	0.0959028
biocarta igf1 pathway	21	0.0154211	0.14627					benporath myc max targets	758	0	0.096697
reactome mapk6 mapk4 signaling	90	0.0010352	0.145939					reactome intra golgi and retrograde golgi to er traffic	201	0	0.0964592
basso b lymphocyte network	143	0.00101112	0.145559					bild myc oncogenic signature	197	0	0.0962641
pal prmt5 targets up	191	0	0.145313					ding lung cancer expression by copy number	100	0.0010142	0.0962135
missiaglia regulated by methylation dn	117	0	0.145037					reactome integrin signaling	27	0.0135135	0.0959762
lindgren bladder cancer cluster 1 up	112	0.00205339	0.144729					tarte plasma cell vs plasmablast dn	303	0	0.0960583
kegg gap junction	87	0.00205128	0.144465					krige response to tosedostat 24hr dn	980	0	0.0961532
biocarta hivnef pathway	56	0.00749465	0.144204					krige response to tosedostat 6hr dn	890	0	0.0959289
casorelli apl secondary vs de novo up	36	0.0121413	0.143885					reactome activation of the mrna upon binding of the cap binding complex and eifs and subsequent binding to 43s	60	0.00835073	0.0956784
gavin foxp3 targets cluster p6	90	0.00208768	0.14363					smith tert targets up	144	0	0.0957658
reactome s phase	161	0	0.143459					reactome peptide hormone biosynthesis	14	0.0172202	0.0959254
pid cdc42 reg pathway	30	0.01373	0.143768					chng multiple myeloma hyperploid dn	30	0.0107991	0.0956823
kyng dna damage dn	178	0.00100806	0.143867					hamai apoptosis via trail up	643	0	0.0955398
martinez response to trabectedin dn	267	0.00100301	0.143642					chiang liver cancer subclass unannotated dn	191	0.00100402	0.096166
elvidge hif1a targets dn	91	0.00310881	0.143506					okumura inflammatory response lps	176	0	0.0965239
shedden lung cancer good survival a4	192	0	0.143308					sesto response to uv c2	53	0.00210526	0.0968933
benporath cycling genes	633	0	0.143173					nikolsky breast cancer 7q21 q22 amplicon	74	0	0.0971621
linsley mir16 targets	203	0	0.142901					reactome abc family proteins mediated transport	103	0.00101317	0.0973806
pid fanconi pathway	47	0.0130861	0.143316					linsley mir16 targets	203	0	0.0977257
reactome eukaryotic translation initiation	119	0.00102775	0.14346					mili pseudopodia chemotaxis dn	411	0	0.097539
wakasugi have znf143 binding sites	60	0.0042735	0.143114					reactome processing and activation of sumo	10	0.019685	0.0980111
wendt cohesin targets up	32	0.0149597	0.142866					pid pdgfrb pathway	129	0	0.098016
gary cd5 targets dn	425	0	0.142582					wei mycn targets with e box	780	0	0.0986397
tarte plasma cell vs b lymphocyte up	78	0.00625	0.142392					molenaar targets of ccnd1 and cdk4 dn	55	0.00630915	0.0985364
zhang targets of ewsr1 fli1 fusion	87	0.00922131	0.144429					biocarta ptdins pathway	23	0.0172414	0.0984025
blalock alzheimers disease up	1627	0	0.144233					borczuk malignant mesothelioma up	304	0	0.0985954
bosco epithelial differentiation module	62	0.0117521	0.14388					kegg neurotrophin signaling pathway	126	0	0.0994237
reactome transcription coupled nucleotide excision repair tc ner	78	0.00736067	0.143964					pid s1p s1p4 pathway	14	0.0148883	0.0996496
reactome g1 s dna damage checkpoints	67	0.00319489	0.143761					reactome regulation of glycolysis by fructose 2 6 bisphosphate metabolism	12	0.0149626	0.0998613
bidus metastasis dn	142	0.0020202	0.143705					ding lung cancer mutated frequently	12	0.0125471	0.100141
mullighan mll signature 1 up	375	0	0.143375					ginestier breast cancer znf217 amplified dn	317	0	0.0999976
elvidge hypoxia up	169	0	0.143758					reactome asparagine n linked glycosylation	302	0	0.100347
reactome regulation of expression of slits and robos	171	0	0.144614					reactome fc epsilon receptor fceri signaling	131	0	0.100582
pujana atm pcc network	1341	0	0.144622					pid ecadherin nascent aj pathway	39	0.00327869	0.100476
madan dppa4 targets	56	0.0128755	0.144381					reactome dna strand elongation	32	0.0143014	0.100495
reactome hedgehog off state	113	0.00610376	0.144172					wang clim2 targets up	228	0	0.100595
krige response to tosedostat 6hr up	874	0	0.144116					reactome s phase	161	0	0.100732
lastowska neuroblastoma copy number up	176	0.00100705	0.143974					odonnell targets of myc and tfrc up	75	0.00517063	0.10054
pid txa2pathway	56	0.00747863	0.14387					biocarta bard1 pathway	8	0.0176871	0.100413
kegg valine leucine and isoleucine degradation	43	0.0119695	0.14369					buytaert photodynamic therapy stress dn	633	0	0.100305
west adrenocortical tumor up	294	0	0.14338					faelt b cll with vh rearrangements dn	49	0.00940439	0.100177
pid upa upar pathway	42	0.0171858	0.143072					rickman tumor differentiated moderately vs poorly up	120	0.00101626	0.0999554
croonquist il6 deprivation up	17	0.0136476	0.143127					reactome cytosolic iron sulfur cluster assembly	11	0.0124378	0.0998611
oswald hematopoietic stem cell in collagen gel dn	266	0	0.143626					pece mammary stem cell up	131	0	0.0997328
kegg amyotrophic lateral sclerosis als	53	0.0119565	0.143541					farmer breast cancer cluster 2	33	0.0122358	0.0997459
reactome synthesis of ip3 and ip4 in the cytosol	26	0.0172018	0.143493					wang metastasis of breast cancer esr1 up	21	0.0128205	0.0995396
reactome selenoamino acid metabolism	117	0.00102354	0.143354					reactome sumoylation	186	0	0.0995237
lindgren bladder cancer cluster 3 up	322	0	0.143189					wakabayashi adipogenesis pparg bound 8d	615	0	0.0995837
reactome c type lectin receptors clrs	140	0.00102987	0.142886					casorelli acute promyelocytic leukemia dn	654	0	0.0996751
smith tert targets up	144	0	0.142642					reactome e2f enabled inhibition of pre replication complex formation	9	0.0177665	0.0996417
reactome respiratory electron transport atp synthesis by chemiosmotic coupling and heat production by uncoupling proteins	106	0.00206612	0.142407					wang tumor invasiveness up	350	0	0.0996059
reactome abortive elongation of hiv 1 transcript in the absence of tat	23	0.0180723	0.142445					biocarta egf pathway	27	0.0120879	0.0997621
pid er nongenomic pathway	40	0.0164294	0.14242					phong tnf response via p38 complete	221	0	0.0996441
reactome pka mediated phosphorylation of key metabolic factors	5	0.0195489	0.142652					furukawa dusp6 targets pci35 dn	69	0.0041365	0.0996474
lui thyroid cancer cluster 2	43	0.0228013	0.143878					reactome cell cycle checkpoints	289	0	0.0996531
reactome negative regulation of mapk pathway	40	0.0144124	0.144229					cui tcf21 targets 2 dn	808	0	0.101374
pid hiv nef pathway	35	0.0112108	0.144844					basaki ybx1 targets up	280	0	0.101666
horiuchi wtap targets up	290	0	0.144546					naderi breast cancer prognosis up	51	0.00736842	0.10151
flechner pbl kidney transplant rejected vs ok up	63	0.0116773	0.144228					yao temporal response to progesterone cluster 10	67	0.00104384	0.101714
reactome clec7a dectin 1 signaling	100	0.00619835	0.14391					nakamura tumor zone peripheral vs central up	272	0	0.101565
acosta proliferation independent myc targets up	83	0.00628931	0.143797					biocarta stress pathway	24	0.0151515	0.10247
reactome thyroxine biosynthesis	10	0.0270636	0.143651					martoriati mdm4 targets fetal liver dn	494	0	0.102432
browne hcmv infection 4hr dn	242	0	0.143641					biocarta tnfr1 pathway	29	0.00780379	0.102546
cui tcf21 targets 2 dn	808	0	0.143923					elvidge hypoxia by dmog dn	59	0.00930714	0.102576
zwang egf interval dn	197	0	0.143983					reactome signaling by ntrk1 trka	78	0.00206186	0.102512
douglas bmi1 targets dn	309	0	0.143673					reactome dual incision in tc ner	65	0.00414508	0.102375
monnier postradiation tumor escape dn	363	0	0.143521					ji carcinogenesis by kras and stk11 up	12	0.0130548	0.102603
rodwell aging kidney up	455	0	0.144051					hirsch cellular transformation signature dn	103	0.00304878	0.102661
reactome fbxl7 down regulates aurka during mitotic entry and in early mitosis	55	0.00859291	0.143964					reactome switching of origins to a post replicative state	90	0.00611621	0.103512
casorelli acute promyelocytic leukemia dn	654	0	0.144102					karlsson tgfb1 targets dn	188	0	0.103441
kegg neurotrophin signaling pathway	126	0.00204499	0.143994					reactome rab regulation of trafficking	121	0	0.103311
pasini suz12 targets dn	300	0	0.143888					oswald hematopoietic stem cell in collagen gel dn	266	0	0.10323
reactome cilium assembly	200	0.0020141	0.144235					charafe breast cancer luminal vs mesenchymal up	436	0	0.103092
smid breast cancer relapse in lung up	22	0.0141844	0.144073					sig insulin receptor pathway in cardiac myocytes	51	0.00632245	0.102886
gobert oligodendrocyte differentiation dn	1045	0	0.143937					sig bcr signaling pathway	46	0.00959488	0.102767
mili pseudopodia haptotaxis up	490	0	0.143707					rodwell aging kidney no blood dn	138	0.00201207	0.102651
thum systolic heart failure up	404	0	0.143676					reactome dna replication	127	0.00203046	0.102636
udayakumar med1 targets up	129	0.00101833	0.144599					gross hypoxia via elk3 only dn	43	0.011828	0.102583
wotton runx targets dn	29	0.0170261	0.144376					kyng environmental stress response not by uv in old	23	0.0148912	0.103496
reactome abc family proteins mediated transport	103	0.00204708	0.14423					faelt b cll with vh3 21 dn	49	0.00632245	0.103717
vanharanta uterine fibroid with 7q deletion up	65	0.0083682	0.144486					acevedo normal tissue adjacent to liver tumor up	166	0.00201207	0.103667
reactome sumoylation of rna binding proteins	47	0.00990099	0.144396					reactome darpp 32 events	23	0.0137457	0.103465
wamunyokoli ovarian cancer lmp dn	191	0.00100908	0.145076					reactome pten regulation	138	0	0.103364
martoriati mdm4 targets fetal liver dn	494	0	0.14486					reactome sumoylation of dna damage response and repair proteins	77	0.00205973	0.103797
reactome regulation of signaling by nodal	11	0.0289474	0.144665					reactome mastl facilitates mitotic progression	10	0.0102302	0.104019
pedersen metastasis by erbb2 isoform 7	379	0	0.144506					dang bound by myc	1036	0	0.104253
reactome rrna processing	200	0.00200803	0.144523					liao have sox4 binding sites	41	0.0087241	0.104482
podar response to adaphostin dn	17	0.0241838	0.144404					reactome gene expression transcription	1465	0	0.104008
johnstone parvb targets 3 up	421	0	0.145298					benporath nanog targets	964	0	0.104254
reactome complex i biogenesis	55	0.00862069	0.145024					wakabayashi adipogenesis pparg rxra bound 8d	820	0	0.104138
cairo hepatoblastoma up	202	0.00100806	0.144788					mootha human mitodb 6 2002	411	0	0.103981
kasler hdac7 targets 1 up	184	0.00101215	0.144711					ishida e2f targets	52	0.00730689	0.104802
oishi cholangioma stem cell like dn	269	0	0.144495					horiuchi wtap targets dn	307	0	0.104966
marson foxp3 targets up	62	0.00739958	0.144271					pid tgfbr pathway	53	0.0114823	0.104937
reactome leukotriene receptors	5	0.0266272	0.144328					kegg endometrial cancer	52	0.00524109	0.104892
reactome adherens junctions interactions	33	0.0193182	0.144275					pid erbb1 internalization pathway	41	0.0182208	0.106326
basso cd40 signaling dn	69	0.0116279	0.144147					wong mitochondria gene module	204	0	0.106787
pece mammary stem cell up	131	0.00303951	0.144034					dutertre estradiol response 24hr dn	498	0	0.106898
sasson response to gonadotrophins dn	86	0.00932642	0.144332					monnier postradiation tumor escape dn	363	0	0.106918
dacosta uv response via ercc3 ttd dn	83	0.0031679	0.144326					pid cdc42 pathway	69	0.00417537	0.106861
reactome disassembly of the destruction complex and recruitment of axin to the membrane	31	0.0221187	0.144879					liu cmyb targets up	160	0	0.10733
reactome met interacts with tns proteins	5	0.015896	0.145196					inamura lung cancer scc up	13	0.0252101	0.108006
holleman asparaginase resistance all dn	25	0.0164706	0.145011					buytaert photodynamic therapy stress up	806	0	0.107834
reactome trna processing in the nucleus	57	0.0128617	0.144721					pid il2 1pathway	55	0.0106724	0.107799
mori emu myc lymphoma by onset time up	107	0.00609137	0.144613					mullighan mll signature 2 up	412	0	0.107904
reactome mineralocorticoid biosynthesis	6	0.0272206	0.144316					ren alveolar rhabdomyosarcoma dn	402	0	0.107726
reactome signaling by notch4	82	0.00625652	0.144498					reactome resolution of abasic sites ap sites	38	0.0109649	0.107626
verhaak glioblastoma mesenchymal	215	0.00100908	0.144424					kegg inositol phosphate metabolism	54	0.0136411	0.107514
williams esr2 targets up	26	0.024619	0.144495					lastowska neuroblastoma copy number up	176	0	0.107367
biocarta creb pathway	22	0.0181378	0.144318					reactome complex i biogenesis	55	0	0.107833
elvidge hypoxia dn	145	0.00202224	0.144041					grade colon and rectal cancer up	288	0	0.107757
reactome oncogene induced senescence	33	0.0222469	0.14429					reactome g1 phase	44	0.0063358	0.108093
reactome dual incision in tc ner	65	0.00954401	0.144331					meinhold ovarian cancer low grade dn	18	0.0250896	0.107946
qi hypoxia targets of hif1a and foxa2	32	0.0171821	0.144327					reactome transcriptional regulation by runx3	95	0.00304569	0.108206
hummerich benign skin tumor up	13	0.0220493	0.144076					wang tumor invasiveness dn	203	0	0.108221
reactome cyclin a:cdk2 associated events at s phase entry	85	0.00622407	0.143796					rodrigues thyroid carcinoma anaplastic dn	501	0	0.10867
lee bmp2 targets up	738	0	0.144449					reactome sumoylation of rna binding proteins	47	0.00749465	0.108778
kegg leishmania infection	69	0.00626305	0.144573					reactome notch2 intracellular domain regulates transcription	12	0.0164766	0.108899
benporath nos targets	174	0	0.144745					reactome cristae formation	13	0.0189633	0.108844
reactome defective cftr causes cystic fibrosis	61	0.0129171	0.144488					provenzani metastasis up	194	0	0.108634
borczuk malignant mesothelioma up	304	0	0.144289					fournier acinar development late 2	280	0.001001	0.109767
kegg vibrio cholerae infection	53	0.01606	0.144945					biocarta gpcr pathway	30	0.01	0.109848
reactome downstream signaling events of b cell receptor bcr	81	0.00737619	0.145252					rhein all glucocorticoid therapy dn	360	0	0.109943
krige response to tosedostat 24hr dn	980	0	0.145274					kegg oocyte meiosis	112	0.00202429	0.109742
gentles leukemic stem cell dn	19	0.0234742	0.145478					reactome synaptic adhesion like molecules	21	0.0259128	0.109594
reactome diseases of signal transduction	385	0	0.145296					reactome rab gefs exchange gtp for gdp on rabs	89	0.00510204	0.109601
stambolsky response to vitamin d3 up	81	0.00522466	0.145305					gavin foxp3 targets cluster t7	94	0.00511247	0.109563
aguirre pancreatic cancer copy number dn	231	0.00200803	0.145556					landemaine lung metastasis	21	0.0235018	0.110364
kegg long term potentiation	70	0.0105374	0.145364					reactome sumoylation of chromatin organization proteins	71	0.010395	0.110334
martinez response to trabectedin	50	0.0163399	0.145351					mori large pre bii lymphocyte up	84	0.00307062	0.110758
liu cmyb targets up	160	0.00101729	0.145136					debiasi apoptosis by reovirus infection up	293	0	0.110603
biocarta cxcr4 pathway	19	0.0202381	0.145115					reactome vitamin b5 pantothenate metabolism	17	0.0121507	0.110779
reactome vif mediated degradation of apobec3g	54	0.0128894	0.144974					reactome fgfr2 alternative splicing	27	0.018931	0.111476
reactome processing of capped intron containing pre mrna	240	0	0.145157					ginestier breast cancer znf217 amplified up	68	0.00828157	0.11149
reactome chemokine receptors bind chemokines	48	0.0164654	0.145676					nikolsky breast cancer 16q24 amplicon	51	0.00856531	0.112186
guo hex targets up	76	0.0105152	0.14552					mootha mitochondria	427	0	0.112375
biocarta erbb3 pathway	5	0.0337243	0.145479					onken uveal melanoma up	776	0	0.112391
zhang breast cancer progenitors dn	129	0.00410256	0.145325					li dcp2 bound mrna	86	0.00407747	0.112293
phong tnf response via p38 complete	221	0.00100604	0.145378					sarrio epithelial mesenchymal transition up	178	0.00100503	0.112131
reactome pou5f1 oct4 sox2 nanog activate genes related to proliferation	13	0.0219355	0.145513					senese hdac3 targets dn	511	0	0.111966
reactome cytosolic iron sulfur cluster assembly	11	0.0228717	0.145393					pid ar nongenomic pathway	31	0.0111111	0.112665
reactome signaling by cytosolic fgfr1 fusion mutants	18	0.0269608	0.145242					gabriely mir21 targets	285	0	0.113014
reactome fcgr activation	12	0.024359	0.145001					ikeda mir133 targets up	43	0.00763359	0.113463
onder cdh1 targets 3 dn	57	0.00854701	0.144733					inamura lung cancer scc subtypes up	14	0.0220588	0.113663
reactome biosynthesis of specialized proresolving mediators spms	19	0.0178571	0.144615					reactome mitotic metaphase and anaphase	201	0.002002	0.113452
hollmann apoptosis via cd40 up	196	0.00100705	0.144471					pid ceramide pathway	44	0.0117773	0.113394
rorie targets of ewsr1 fli1 fusion up	27	0.0264977	0.144346					magrangeas multiple myeloma igg vs iga dn	25	0.0183066	0.113408
manalo hypoxia up	197	0.00100806	0.144506					ren bound by e2f	61	0.00726141	0.113311
der ifn beta response up	102	0.00518672	0.144275					yoshimura mapk8 targets dn	345	0	0.113358
pid avb3 opn pathway	31	0.0191874	0.144214					mariadason response to butyrate sulindac 6	45	0.00860215	0.113308
reactome pp2a mediated dephosphorylation of key metabolic factors	7	0.0308311	0.144231					fardin hypoxia 11	32	0.0166482	0.113814
reactome class i mhc mediated antigen processing presentation	364	0	0.144097					liu il13 memory model up	17	0.0193004	0.114072
pid integrin3 pathway	42	0.0107181	0.144668					reactome platelet sensitization by ldl	17	0.0168675	0.113955
foster kdm1a targets dn	197	0	0.144466					shedden lung cancer good survival a4	192	0	0.113814
pid angiopoietin receptor pathway	49	0.0118407	0.144205					reactome metabolism of amino acids and derivatives	371	0	0.114254
park hsc and multipotent progenitors	41	0.0109769	0.144976					biocarta hswi snf pathway	12	0.0229192	0.114752
reactome signaling by notch2	33	0.0201342	0.144756					blalock alzheimers disease dn	1217	0	0.114793
reactome signaling by scf kit	43	0.0176991	0.144624					reactome abc transporter disorders	77	0.00205339	0.114673
gentile uv high dose dn	280	0.001	0.14452					kegg limonene and pinene degradation	9	0.0171504	0.114631
reactome met activates ptk2 signaling	30	0.0240826	0.144267					nuytten nipp1 targets up	739	0	0.115396
koyama sema3b targets dn	341	0	0.144462					schuhmacher myc targets up	79	0.00408998	0.116175
wei mycn targets with e box	780	0	0.144391					biocarta pyk2 pathway	27	0.016	0.116333
rodrigues thyroid carcinoma anaplastic up	695	0	0.144269					bhat esr1 targets via akt1 dn	79	0.00412797	0.116241
schlesinger h3k27me3 in normal and methylated in cancer	28	0.0184544	0.144083					kim wt1 targets 12hr dn	209	0.001002	0.116242
udayakumar med1 targets dn	234	0	0.143872					horton srebf targets	24	0.0191874	0.11611
pid pdgfra pathway	22	0.0175644	0.143723					pid er nongenomic pathway	40	0.00877193	0.116157
reactome rora activates gene expression	18	0.0259259	0.143589					reactome downstream signaling events of b cell receptor bcr	81	0.00508647	0.116031
biocarta ppara pathway	52	0.0160428	0.14349					pid aurora a pathway	31	0.0123874	0.115954
yao temporal response to progesterone cluster 17	178	0	0.143429					reactome inhibition of the proteolytic activity of apc c required for the onset of anaphase by mitotic spindle checkpoint components	20	0.020979	0.116456
pid p53 regulation pathway	58	0.00859291	0.143171					berenjeno transformed by rhoa dn	376	0	0.11672
ji response to fsh up	64	0.00962567	0.143463					zhong response to azacitidine and tsa dn	69	0.0135841	0.116507
xu hgf targets repressed by akt1 dn	84	0.00520291	0.143307					tien intestine probiotics 6hr dn	167	0.00100301	0.116564
pujana chek2 pcc network	746	0	0.143109					biocarta tel pathway	17	0.0215827	0.116402
fischer g1 s cell cycle	195	0.00702106	0.143027					charafe breast cancer luminal vs basal up	369	0	0.11651
brueckner targets of mirlet7a3 up	107	0.00514933	0.143131					yih response to arsenite c3	30	0.0219539	0.116753
phong tnf response not via p38	334	0	0.142961					park hsc and multipotent progenitors	41	0.016538	0.116604
fulcher inflammatory response lectin vs lps up	562	0	0.142892					kegg progesterone mediated oocyte maturation	85	0.00614754	0.116533
buytaert photodynamic therapy stress dn	633	0	0.143063					biocarta igf1r pathway	23	0.021542	0.116476
schlosser myc targets and serum response up	46	0.0118662	0.14365					lee recent thymic emigrant	221	0	0.116646
reactome synthesis of 5 eicosatetraenoic acids	9	0.0106952	0.144237					mootha pgc	411	0	0.116492
azare neoplastic transformation by stat3 dn	18	0.0288582	0.14397					basaki ybx1 targets dn	370	0	0.116385
senese hdac1 targets dn	243	0.00200803	0.143819					sansom apc targets require myc	212	0	0.116211
biocarta ccr3 pathway	19	0.0180723	0.14411					asgharzadeh neuroblastoma poor survival dn	41	0.012945	0.116125
kegg chemokine signaling pathway	186	0	0.143873					pid arf6 pathway	35	0.0186608	0.116088
fevr ctnnb1 targets dn	545	0	0.14366					gross hypoxia via hif1a up	73	0.0061792	0.116268
pid erbb2 erbb3 pathway	44	0.0141612	0.144011					provenzani metastasis dn	140	0.00200803	0.11616
yoshimura mapk8 targets dn	345	0	0.143871					pid erbb2 erbb3 pathway	44	0.00967742	0.116604
munshi multiple myeloma up	76	0.0105152	0.144038					reactome metabolism of water soluble vitamins and cofactors	121	0.00100908	0.116489
ross leukemia with mll fusions	78	0.0125523	0.143939					kegg long term potentiation	70	0.00822199	0.116692
sesto response to uv c8	70	0.0095037	0.143703					jazaeri breast cancer brca1 vs brca2 up	48	0.0106724	0.116497
pid ps1 pathway	45	0.0160428	0.143572					blalock alzheimers disease up	1627	0	0.116612
fischer dream targets	958	0	0.143356					parent mtor signaling up	550	0	0.116936
reactome mitotic metaphase and anaphase	201	0	0.143265					kumamoto response to nutlin 3a dn	10	0.0263819	0.116797
chang immortalized by hpv31 dn	60	0.00316122	0.14427					elvidge hif1a and hif2a targets up	40	0.0131004	0.117105
smid breast cancer normal like up	452	0	0.144212					kaab failed heart atrium dn	145	0.00200602	0.116989
tien intestine probiotics 6hr up	50	0.0150376	0.144102					reactome ubiquinol biosynthesis	8	0.0171958	0.117785
reactome respiratory electron transport	99	0.00932642	0.143872					boylan multiple myeloma c cluster up	35	0.0132013	0.117631
nakamura tumor zone peripheral vs central up	272	0	0.143926					chiang liver cancer subclass proliferation up	175	0	0.117751
wang clim2 targets dn	175	0.00100301	0.144066					reactome class i mhc mediated antigen processing presentation	364	0	0.117718
doane breast cancer esr1 dn	46	0.0150215	0.144731					mullighan mll signature 1 up	375	0	0.117584
li amplified in lung cancer	180	0.00201613	0.144797					pid myc pathway	25	0.0223964	0.117525
tarte plasma cell vs plasmablast dn	303	0	0.144718					reactome trna processing in the nucleus	57	0.014629	0.117967
yih response to arsenite c3	30	0.0159817	0.144461					petrova prox1 targets up	25	0.0216401	0.118031
appierto response to fenretinide dn	48	0.017149	0.144277					reactome cdk mediated phosphorylation and removal of cdc6	72	0.00725389	0.118452
reactome wnt5a dependent internalization of fzd4	15	0.0234568	0.144059					huang gata2 targets dn	70	0.00414508	0.1199
chiaretti acute lymphoblastic leukemia zap70	65	0.00945378	0.143903					reactome programmed cell death	177	0.001002	0.119721
mootha human mitodb 6 2002	411	0	0.144515					tonks targets of runx1 runx1t1 fusion granulocyte up	50	0.0159915	0.119735
reactome regulation of apoptosis	53	0.0162338	0.144575					krieg hypoxia not via kdm3a	713	0	0.119722
kauffmann dna repair genes	225	0.00201005	0.144596					watanabe rectal cancer radiotherapy responsive dn	91	0.00511247	0.119607
dang regulated by myc dn	245	0	0.144359					biocarta spry pathway	17	0.0275449	0.119941
biocarta epo pathway	19	0.023199	0.144177					pellicciotta hdac in antigen presentation up	61	0.0062435	0.120194
johnstone parvb targets 2 up	143	0.00302419	0.1442					subtil progestin targets	34	0.0152505	0.120046
boylan multiple myeloma pca1 up	108	0.00410678	0.144046					reactome pi metabolism	83	0.0020429	0.120101
provenzani metastasis up	194	0.00301811	0.144891					reactome defects in vitamin and cofactor metabolism	20	0.0218894	0.120826
biocarta barrestin src pathway	17	0.0219512	0.145229					mueller plurinet	299	0	0.121053
reactome negative regulation of notch4 signaling	54	0.0149733	0.145075					chemnitz response to prostaglandin e2 dn	356	0	0.121379
yagi aml survival	118	0.0061792	0.145042					hoebeke lymphoid stem cell up	89	0.00714286	0.121412
reactome class c 3 metabotropic glutamate pheromone receptors	39	0.0220507	0.144898					reactome advanced glycosylation endproduct receptor signaling	13	0.0178117	0.121232
ray tumorigenesis by erbb2 cdc25a dn	251	0	0.145384					reactome pp2a mediated dephosphorylation of key metabolic factors	7	0.0169935	0.12198
lee targets of ptch1 and sufu dn	82	0.0104167	0.145203					reactome signaling by notch4	82	0.00516529	0.121799
barrier cancer relapse tumor sample up	16	0.0315259	0.145011					wang response to gsk3 inhibitor sb216763 dn	353	0	0.121689
chiang liver cancer subclass unannotated dn	191	0	0.144952					reactome rho gtpases activate formins	138	0	0.121701
jechlinger epithelial to mesenchymal transition dn	60	0.0105932	0.14528					rodwell aging kidney up	455	0	0.122779
papaspyridonos unstable aterosclerotic plaque dn	40	0.0209482	0.145511					reactome signaling by hedgehog	150	0.00202634	0.122757
reactome cell cycle	639	0	0.145474					mikkelsen ips lcp with h3k27me3	10	0.0246753	0.122819
laiho colorectal cancer serrated up	109	0.00206186	0.145651					kamminga ezh2 targets	41	0.0129171	0.122733
lein choroid plexus markers	102	0.0081716	0.145903					ruiz tnc targets up	151	0	0.123237
reactome rrna processing in the nucleus and cytosol	190	0.00404858	0.14574					tomida metastasis up	26	0.0193843	0.12346
shedden lung cancer good survival a12	271	0.001001	0.145869					reactome trna modification in the mitochondrion	9	0.0309677	0.123457
pid caspase pathway	51	0.0274123	0.145907					benporath oct4 targets	285	0	0.123314
torchia targets of ewsr1 fli1 fusion dn	308	0	0.146322					hollmann apoptosis via cd40 up	196	0.00100402	0.123442
hamai apoptosis via trail up	643	0	0.14635					reactome signaling by notch2	33	0.0274424	0.124008
nuytten ezh2 targets up	1006	0	0.146269					schaeffer prostate development and cancer box4 dn	33	0.0222469	0.123897
reactome disease	1071	0	0.146653					pid caspase pathway	51	0.0106157	0.123716
ruiz tnc targets up	151	0.00101729	0.146579					bonome ovarian cancer poor survival dn	20	0.0286396	0.123552
reactome rab regulation of trafficking	121	0.00204918	0.146476					biocarta carm1 pathway	12	0.0228717	0.123416
nikolsky breast cancer 16q24 amplicon	51	0.0118919	0.146599					reactome interleukin 1 signaling	102	0.00812183	0.123414
reactome abc transporter disorders	77	0.00951374	0.147017					heidenblad amplicon 12p11 12 dn	20	0.0259434	0.123954
pid ncadherin pathway	33	0.0263459	0.146865					wood ebv ebna1 targets up	108	0.00507614	0.123942
krieg hypoxia not via kdm3a	713	0	0.14666					stanelle e2f1 targets	29	0.0223464	0.123759
rodrigues thyroid carcinoma anaplastic dn	501	0	0.147165					simbulan parp1 targets dn	17	0.0153121	0.12385
biocarta akapcentrosome pathway	14	0.0290771	0.147124					rickman metastasis dn	249	0	0.123726
reactome cytosolic sensors of pathogen associated dna	62	0.0125786	0.147					le egr2 targets up	104	0.00406091	0.123574
bruins uvc response middle	94	0.00618557	0.14754					zhan multiple myeloma cd1 and cd2 up	89	0.00409836	0.123725
kegg tgf beta signaling pathway	85	0.00520291	0.147457					iwanaga e2f1 targets induced by serum	23	0.0221704	0.123601
davicioni molecular arms vs erms up	329	0	0.14809					dazard response to uv scc dn	110	0.00808081	0.124188
pujana brca1 pcc network	1567	0	0.148814					pid insulin pathway	44	0.0149893	0.124001
ivanova hematopoiesis intermediate progenitor	125	0.00304878	0.148645					goldrath homeostatic proliferation	141	0	0.124115
reactome antigen processing cross presentation	98	0.00517598	0.148579					zamora nos2 targets up	52	0.0126183	0.123978
gale apl with flt3 mutated up	57	0.00957447	0.148408					tuomisto tumor suppression by col13a1 dn	16	0.0267315	0.12379
mootha mitochondria	427	0	0.148402					browne hcmv infection 4hr dn	242	0	0.123938
huang foxa2 targets dn	38	0.0286976	0.148357					kegg n glycan biosynthesis	46	0.0138889	0.124337
rizki tumor invasiveness 3d up	206	0	0.148622					vantveer breast cancer metastasis dn	127	0.00202429	0.12439
reactome apc c:cdh1 mediated degradation of cdc20 and other apc c:cdh1 targeted proteins in late mitosis early g1	72	0.010582	0.149091					pid ecadherin stabilization pathway	41	0.0160772	0.124206
pid shp2 pathway	57	0.0151515	0.14905					de yy1 targets dn	90	0.0102775	0.124064
ding lung cancer mutated frequently	12	0.0207792	0.148834					reactome ephb mediated forward signaling	42	0.0119048	0.123978
reactome negative feedback regulation of mapk pathway	6	0.0352609	0.148863					shin b cell lymphoma cluster 1	13	0.0258621	0.123843
nuytten nipp1 targets up	739	0	0.148712					jain nfkb signaling	72	0.00620476	0.123655
chang pou5f1 targets up	14	0.0298314	0.148667					biocarta raccycd pathway	26	0.0187573	0.123858
reactome met promotes cell motility	41	0.0294118	0.148955					flechner pbl kidney transplant ok vs donor up	150	0	0.125125
chiang liver cancer subclass interferon dn	51	0.0172786	0.14885					reactome rna polymerase ii transcribes snrna genes	74	0.00932642	0.125348
boylan multiple myeloma c cluster up	35	0.0179574	0.149826					reactome regulation of runx3 expression and activity	55	0.0148778	0.125527
basaki ybx1 targets dn	370	0	0.150271					heidenblad amplified in pancreatic cancer	54	0.0157895	0.125979
li dcp2 bound mrna	86	0.0112936	0.150353					douglas bmi1 targets up	547	0	0.126253
laiho colorectal cancer serrated dn	83	0.0083682	0.150133					senese hdac1 targets dn	243	0	0.12624
biocarta cardiacegf pathway	18	0.0217129	0.149921					rickman tumor differentiated well vs moderately up	103	0.00716479	0.126084
tomida metastasis up	26	0.0246769	0.150115					wang cisplatin response and xpc dn	216	0.001002	0.125956
kokkinakis methionine deprivation 48hr dn	61	0.0137712	0.149959					kokkinakis methionine deprivation 48hr dn	61	0.0148462	0.125908
subtil progestin targets	34	0.0212766	0.150132					alonso metastasis up	190	0	0.126187
reactome trna modification in the nucleus and cytosol	42	0.0119826	0.150082					xu gh1 autocrine targets dn	128	0.00101112	0.126116
charafe breast cancer luminal vs basal dn	439	0	0.150424					kamminga senescence	39	0.017316	0.126422
reactome interleukin 3 interleukin 5 and gm csf signaling	48	0.0174482	0.150789					mori pre bi lymphocyte up	79	0.00514933	0.1263
reactome nuclear events kinase and transcription factor activation	25	0.0232288	0.150665					pid fak pathway	58	0.0167539	0.126128
reactome interleukin 15 signaling	14	0.0300752	0.150525					gobert oligodendrocyte differentiation dn	1045	0	0.12642
kamminga senescence	39	0.0222222	0.151101					reactome protein localization	160	0.00100705	0.126384
gentile uv response cluster d6	34	0.0246361	0.15107					reactome phosphorylation site mutants of ctnnb1 are not targeted to the proteasome by the destruction complex	15	0.0268949	0.1267
rodrigues thyroid carcinoma poorly differentiated up	623	0	0.151375					reactome signalling to erks	32	0.0223964	0.126756
reactome switching of origins to a post replicative state	90	0.0104275	0.151416					marson foxp3 targets up	62	0.00819672	0.126615
wang clim2 targets up	228	0.00200602	0.151272					schlosser myc targets repressed by serum	157	0.00200401	0.126948
pid erb genomic pathway	15	0.0334158	0.151384					vanharanta uterine fibroid with 7q deletion dn	36	0.0243632	0.127035
tonks targets of runx1 runx1t1 fusion granulocyte up	50	0.020765	0.151378					fung il2 targets with stat5 binding sites	7	0.0417227	0.127018
gross hypoxia via hif1a up	73	0.0127932	0.15136					zhang response to cantharidin dn	63	0.0106383	0.126955
kegg lysosome	121	0.00819672	0.151303					douglas bmi1 targets dn	309	0	0.126793
kim all disorders calb1 corr up	540	0	0.151738					reactome cyclin a:cdk2 associated events at s phase entry	85	0.00514403	0.126722
kegg pancreatic cancer	70	0.0136411	0.1517					valk aml cluster 15	30	0.0253583	0.126821
charafe breast cancer luminal vs basal up	369	0	0.151637					landis erbb2 breast tumors 324 up	145	0.00202634	0.127198
ross aml with cbfb myh11 fusion	50	0.0226782	0.152099					ji response to fsh up	64	0.0093361	0.127168
reactome activation of nf kappab in b cells	67	0.0193548	0.15189					zhan multiple myeloma cd1 dn	44	0.0160256	0.127626
reactome sumoylation of dna damage response and repair proteins	77	0.0115546	0.151766					pid p38 alpha beta pathway	30	0.0248027	0.128572
mitsiades response to aplidin dn	246	0	0.151561					yagi aml survival	118	0.00303337	0.128768
onder cdh1 targets 2 dn	462	0	0.151654					pid telomerase pathway	67	0.0176349	0.128586
reactome hormone ligand binding receptors	12	0.0439276	0.151727					baelde diabetic nephropathy dn	423	0	0.128515
chin breast cancer copy number dn	12	0.0358974	0.151721					wang esophagus cancer vs normal dn	100	0.0030896	0.128724
gaussmann mll af4 fusion targets c up	161	0.00202224	0.151698					dacosta uv response via ercc3 ttd dn	83	0.00615385	0.128946
jaatinen hematopoietic stem cell up	299	0	0.15163					udayakumar med1 targets dn	234	0	0.129489
bakker foxo3 targets up	54	0.0137566	0.151597					reactome raf activation	30	0.0176406	0.12996
turashvili breast ductal carcinoma vs ductal normal dn	182	0.00202224	0.151789					ouyang prostate cancer progression up	20	0.0268065	0.129891
mikkelsen partially reprogrammed to pluripotency	9	0.041555	0.151849					disteche escaped from x inactivation	13	0.027611	0.129762
reactome cd209 dc sign signaling	21	0.0300481	0.151694					reactome antigen processing: ubiquitination proteasome degradation	303	0	0.129618
lopes methylated in colon cancer dn	28	0.033557	0.151641					bild ctnnb1 oncogenic signature	76	0.00822199	0.129756
kim mycn amplification targets up	91	0.00521376	0.15217					blum response to salirasib up	243	0	0.129803
bredemeyer rag signaling not via atm dn	56	0.0150376	0.152132					guo hex targets up	76	0.0124611	0.129952
mikkelsen mef hcp with h3k27me3	574	0	0.152428					reactome generic transcription pathway	1206	0	0.129877
reactome viral messenger rna synthesis	44	0.0195016	0.152503					kegg epithelial cell signaling in helicobacter pylori infection	68	0.0115425	0.13007
valk aml cluster 5	30	0.0232019	0.152536					bonome ovarian cancer poor survival up	31	0.025	0.13018
reactome acetylcholine binding and downstream events	14	0.0351317	0.152343					yao temporal response to progesterone cluster 17	178	0	0.130088
pid ecadherin stabilization pathway	41	0.0220507	0.152593					kegg glyoxylate and dicarboxylate metabolism	16	0.0332937	0.130056
reactome gaba b receptor activation	38	0.0212766	0.153078					kegg retinol metabolism	64	0.0112936	0.129946
sotiriou breast cancer grade 1 vs 3 dn	50	0.0227027	0.152882					reactome formation of tc ner pre incision complex	53	0.019937	0.129866
reactome mitotic prometaphase	198	0.00100604	0.152934					whitfield cell cycle s	146	0.00100806	0.130189
reactome integrin signaling	27	0.0193182	0.153203					fernandez bound by myc	179	0.00402414	0.130076
douglas bmi1 targets up	547	0	0.153397					lopez mbd targets	926	0	0.129938
rickman head and neck cancer a	99	0.00514933	0.153246					horiuchi wtap targets up	290	0	0.130989
reactome formation of tc ner pre incision complex	53	0.022412	0.153322					laiho colorectal cancer serrated up	109	0.00607287	0.130889
pid ajdiss 2pathway	48	0.0238871	0.153643					johnstone parvb targets 3 up	421	0	0.130796
jain nfkb signaling	72	0.0126183	0.153678					kokkinakis methionine deprivation 96hr dn	72	0.00825593	0.130627
stark prefrontal cortex 22q11 deletion up	190	0.00100705	0.153596					jeon smad6 targets dn	18	0.0293083	0.13058
reactome downstream signal transduction	29	0.0289017	0.15364					kegg cell cycle	124	0.00101215	0.130513
schlesinger methylated de novo in cancer	87	0.00725389	0.153739					lin npas4 targets up	162	0.001001	0.130594
huang gata2 targets up	146	0.00506586	0.153532					reactome fcgamma receptor fcgr dependent phagocytosis	86	0.00609756	0.130599
flechner pbl kidney transplant ok vs donor up	150	0.00203459	0.153732					reactome noncanonical activation of notch3	8	0.0375335	0.130773
dacosta uv response via ercc3 ttd up	59	0.0138445	0.153521					torchia targets of ewsr1 fli1 fusion dn	308	0	0.130877
tong interact with pttg1	54	0.0214362	0.153479					reactome apc cdc20 mediated degradation of nek2a	25	0.0290023	0.130706
onken uveal melanoma up	776	0	0.154004					gargalovic response to oxidized phospholipids turquoise dn	55	0.0160256	0.130633
gentile uv low dose dn	63	0.0162514	0.153822					reactome negative regulation of notch4 signaling	54	0.0197711	0.131121
dorsey gab2 targets	30	0.0254925	0.153874					boyault liver cancer subclass g23 up	53	0.0127389	0.131207
kegg inositol phosphate metabolism	54	0.0204741	0.153893					biocarta cftr pathway	11	0.0353535	0.131101
roylance breast cancer 16q copy number up	60	0.0158228	0.154317					rodwell aging kidney dn	136	0.00203046	0.131006
marson bound by e2f4 unstimulated	668	0	0.154296					reactome asymmetric localization of pcp proteins	64	0.0156904	0.13099
kegg endometrial cancer	52	0.0269107	0.154296					wendt cohesin targets up	32	0.0208791	0.131458
lee calorie restriction muscle dn	44	0.0193757	0.154997					reactome defective cftr causes cystic fibrosis	61	0.0155763	0.131879
lopez mbd targets	926	0	0.154884					appierto response to fenretinide dn	48	0.0211193	0.132
dittmer pthlh targets up	109	0.00825593	0.154958					lu tumor angiogenesis up	25	0.0285388	0.132123
pid nectin pathway	30	0.0382831	0.154889					reactome apc c:cdh1 mediated degradation of cdc20 and other apc c:cdh1 targeted proteins in late mitosis early g1	72	0.0112936	0.131986
ramaswamy metastasis up	64	0.0106157	0.154993					pid s1p s1p3 pathway	29	0.0191011	0.132117
nagy tftc components human	19	0.022113	0.155165					le neuronal differentiation dn	18	0.0324519	0.132333
fortschegger phf8 targets dn	759	0	0.155303					pomeroy medulloblastoma desmoplasic vs classic dn	60	0.0148305	0.132753
zhou tnf signaling 4hr	52	0.012931	0.154972					bild e2f3 oncogenic signature	236	0	0.132855
kegg bladder cancer	42	0.0332594	0.155026					reactome mineralocorticoid biosynthesis	6	0.0180807	0.132898
nagy pcaf components human	9	0.0355263	0.155762					tien intestine probiotics 2hr dn	87	0.0142421	0.132873
biocarta spry pathway	17	0.0415648	0.15596					welcsh brca1 targets dn	139	0.00101112	0.132883
pid il12 stat4 pathway	33	0.02746	0.155981					reactome regulation of ras by gaps	68	0.0184615	0.132912
zhang antiviral response to ribavirin up	28	0.0309989	0.156045					ross leukemia with mll fusions	78	0.00925926	0.133166
reactome cargo concentration in the er	33	0.0328054	0.155874					mariadason regulated by histone acetylation dn	38	0.0251092	0.133211
browne hcmv infection 14hr dn	280	0.001002	0.156882					chiaretti acute lymphoblastic leukemia zap70	65	0.00829876	0.13324
iizuka liver cancer progression g2 g3 dn	9	0.0423497	0.15703					podar response to adaphostin dn	17	0.0243309	0.133358
bilban b cll lpl up	58	0.0161987	0.15717					kyng dna damage dn	178	0.00100402	0.133211
reactome nrage signals death through jnk	59	0.021164	0.157324					pid integrin a4b1 pathway	33	0.0197152	0.133528
kaab heart atrium vs ventricle up	252	0.001001	0.15745					reactome activation of apc c and apc c:cdc20 mediated degradation of mitotic proteins	76	0.00931677	0.133546
pid rhoa reg pathway	46	0.0326442	0.157407					gargalovic response to oxidized phospholipids tan dn	10	0.0256739	0.133473
reactome semaphorin interactions	64	0.0191286	0.157301					rizki tumor invasiveness 2d dn	59	0.0116279	0.133683
biocarta mal pathway	19	0.0364706	0.157274					wamunyokoli ovarian cancer grades 1 2 up	137	0.00709939	0.133707
nakamura tumor zone peripheral vs central dn	598	0	0.157208					vantveer breast cancer poor prognosis	56	0.0208986	0.133546
holleman prednisolone resistance all up	18	0.0401949	0.157282					gentile uv response cluster d4	53	0.0200846	0.133379
heidenblad amplicon 8q24 dn	39	0.0280584	0.157145					reactome unwinding of dna	12	0.0380228	0.133459
reactome role of phospholipids in phagocytosis	25	0.0306818	0.157105					boyault liver cancer subclass g123 dn	50	0.0234792	0.133339
reactome phospholipid metabolism	205	0.00302419	0.156899					graessmann apoptosis by doxorubicin up	1108	0	0.133429
reactome mitotic telophase cytokinesis	13	0.0362225	0.156746					biocarta set pathway	10	0.0322997	0.133473
chyla cbfa2t3 targets up	368	0.001002	0.156563					bruins uvc response middle	94	0.00814664	0.133485
reactome rho gtpase cycle	138	0.0070922	0.156396					reactome regulation of lipid metabolism by peroxisome proliferator activated receptor alpha pparalpha	119	0.00806452	0.133434
reactome regulated proteolysis of p75ntr	11	0.0284238	0.156512					martinez response to trabectedin	50	0.00947368	0.133485
benporath myc max targets	758	0	0.156802					reactome metabolism of polyamines	59	0.0155925	0.133671
pid erbb1 internalization pathway	41	0.0279642	0.157312					reactome metabolism of cofactors	19	0.0422705	0.133539
wong mitochondria gene module	204	0	0.157162					kegg pancreatic cancer	70	0.0145228	0.133369
reactome cdk mediated phosphorylation and removal of cdc6	72	0.0167364	0.158019					shedden lung cancer good survival a5	69	0.0135417	0.133563
pomeroy medulloblastoma desmoplasic vs classic dn	60	0.0290323	0.158136					reactome scf skp2 mediated degradation of p27 p21	60	0.0168776	0.134003
reactome sumoylation of transcription cofactors	42	0.0399556	0.158125					berenjeno transformed by rhoa up	528	0	0.133861
plasari tgfb1 signaling via nfic 1hr dn	101	0.0122574	0.158041					falvella smokers with lung cancer	79	0.0173647	0.133894
zhou inflammatory response fima dn	262	0	0.157883					dittmer pthlh targets up	109	0.00407332	0.135373
hirsch cellular transformation signature up	240	0.00200803	0.158538					reactome toll like receptor 4 tlr4 cascade	127	0.00505561	0.135637
vantveer breast cancer esr1 dn	264	0	0.158574					chung blister cytotoxicity dn	44	0.0254777	0.135911
reactome adaptive immune system	740	0	0.158595					pid vegfr1 pathway	26	0.0250569	0.135831
wang esophagus cancer vs normal dn	100	0.013347	0.15858					davicioni molecular arms vs erms up	329	0	0.136023
reactome gastrin creb signalling pathway via pkc and mapk	18	0.0337079	0.158487					verhaak glioblastoma classical	157	0.00201816	0.13604
simbulan parp1 targets up	28	0.0347222	0.158583					li wilms tumor anaplastic up	17	0.032767	0.135916
wang smarce1 targets up	284	0	0.159087					reactome hedgehog ligand biogenesis	65	0.0164779	0.135865
lein medulla markers	84	0.0135135	0.15901					zamora nos2 targets dn	77	0.0123203	0.136576
reactome regulation of tp53 activity through phosphorylation	92	0.00823045	0.158933					reactome translesion synthesis by y family dna polymerases bypasses lesions on dna template	39	0.0290635	0.136577
engelmann cancer progenitors dn	65	0.0136698	0.158927					kim all disorders calb1 corr up	540	0	0.136945
hahtola mycosis fungoides skin up	173	0.00302419	0.158869					gentile uv response cluster d8	37	0.0307692	0.136846
kegg oocyte meiosis	112	0.00512295	0.15876					reactome degradation of gli1 by the proteasome	60	0.0187305	0.137011
reactome phosphorylation site mutants of ctnnb1 are not targeted to the proteasome by the destruction complex	15	0.0410256	0.159588					iritani mad1 targets dn	41	0.0139037	0.137287
lim mammary luminal mature up	108	0.00823045	0.15949					reactome lagging strand synthesis	20	0.0301974	0.137232
wacker hypoxia targets of vhl	13	0.039897	0.159432					biocarta at1r pathway	27	0.027027	0.137256
deurig t cell prolymphocytic leukemia dn	303	0	0.15941					biocarta il10 pathway	13	0.0443896	0.137104
reactome g1 phase	44	0.0292524	0.15938					reactome hiv elongation arrest and recovery	36	0.0230769	0.137258
reactome sumoylation	186	0.0020202	0.159406					foster kdm1a targets dn	197	0.00301205	0.137442
reactome long term potentiation	23	0.0443925	0.159522					kegg vibrio cholerae infection	53	0.0127119	0.137441
lockwood amplified in lung cancer	210	0.00100402	0.159337					ly aging old dn	55	0.0137858	0.137289
browne hcmv infection 24hr dn	139	0.00715746	0.15962					fontaine thyroid tumor uncertain malignancy up	36	0.0336957	0.137255
reactome activation of apc c and apc c:cdc20 mediated degradation of mitotic proteins	76	0.0189673	0.159726					vanharanta uterine fibroid with 7q deletion up	65	0.0155925	0.137186
coulouarn temporal tgfb1 signature dn	136	0.00908174	0.160165					reactome interleukin 1 family signaling	139	0.00303337	0.137178
zhan multiple myeloma cd1 vs cd2 dn	50	0.0239651	0.160244					plasari tgfb1 signaling via nfic 1hr dn	101	0.0040858	0.137322
coulouarn temporal tgfb1 signature up	108	0.0102564	0.160132					kegg colorectal cancer	62	0.0167891	0.137688
pid alpha synuclein pathway	32	0.0307167	0.159948					biocarta mal pathway	19	0.028169	0.137704
bonome ovarian cancer survival suboptimal debulking	488	0	0.159862					han satb1 targets up	413	0	0.137727
enk uv response epidermis up	291	0	0.160233					jaatinen hematopoietic stem cell up	299	0	0.137588
biocarta il22bp pathway	9	0.0478088	0.160129					stambolsky response to vitamin d3 up	81	0.0133745	0.13784
reactome antigen processing: ubiquitination proteasome degradation	303	0.00100301	0.159954					reactome signaling by cytosolic fgfr1 fusion mutants	18	0.0336134	0.138543
mitsiades response to aplidin up	427	0	0.159759					reactome disease	1071	0	0.138585
okumura inflammatory response lps	176	0.00302115	0.159871					nagy tftc components human	19	0.04038	0.138749
grade colon and rectal cancer up	288	0	0.159957					reactome dual incision in gg ner	41	0.0226293	0.138781
foster tolerant macrophage up	155	0.00100604	0.159776					williams esr1 targets up	26	0.0316742	0.139159
biocarta cftr pathway	11	0.0443864	0.15972					landis erbb2 breast preneoplastic dn	57	0.0157895	0.1392
pyeon hpv positive tumors dn	10	0.0384123	0.159571					kegg b cell receptor signaling pathway	75	0.00921187	0.13915
fujii ybx1 targets up	42	0.0282609	0.160662					reactome sumo is proteolytically processed	6	0.0331034	0.139547
yanagisawa lung cancer recurrence	9	0.0486486	0.160506					kegg renal cell carcinoma	70	0.0195473	0.139596
iwanaga carcinogenesis by kras dn	116	0.00615385	0.16065					reactome ephrin signaling	19	0.045614	0.139537
karlsson tgfb1 targets dn	188	0.00201816	0.160789					bystrykh hematopoiesis stem cell and brain qtl cis	63	0.0238837	0.139741
marson foxp3 targets stimulated up	29	0.0427928	0.160701					reactome hedgehog off state	113	0.00609756	0.139662
pid delta np63 pathway	46	0.0380022	0.160553					schlosser myc and serum response synergy	31	0.0352035	0.139768
gobert oligodendrocyte differentiation up	555	0	0.160424					nunoda response to dasatinib imatinib up	29	0.0281849	0.139634
reactome runx1 interacts with co factors whose precise effect on runx1 targets is not known	37	0.0356745	0.160251					biocarta ccr3 pathway	19	0.0389151	0.139843
biocarta gh pathway	27	0.0282021	0.160454					reactome golgi to er retrograde transport	132	0.00302115	0.139836
biocarta hcmv pathway	17	0.0416157	0.160392					graham cml quiescent vs cml dividing dn	11	0.0277078	0.139911
reactome mitotic g1 g1 s phases	149	0.00605449	0.160775					benporath es 1	375	0	0.140098
reactome degradation of axin	55	0.0215517	0.16084					reactome cytosolic trna aminoacylation	24	0.0418552	0.140015
reactome cell cycle mitotic	535	0	0.160724					chandran metastasis top50 up	36	0.029316	0.140029
pid vegfr1 pathway	26	0.0372093	0.161232					fulcher inflammatory response lectin vs lps up	562	0	0.139863
mcbryan pubertal breast 6 7wk up	181	0.00403226	0.161276					coulouarn temporal tgfb1 signature dn	136	0.0040282	0.139956
pujana breast cancer with brca1 mutated up	57	0.0247312	0.162687					reactome signaling by rho gtpases	448	0	0.13995
rodwell aging kidney no blood up	207	0.00704935	0.162416					sotiriou breast cancer grade 1 vs 3 dn	50	0.0179894	0.140215
browne hcmv infection 18hr up	168	0.00202429	0.162747					phong tnf response not via p38	334	0.001	0.140086
cairo liver development up	160	0.00607903	0.162931					reactome regulation of signaling by nodal	11	0.0409511	0.139961
pid bmp pathway	41	0.031556	0.162912					kim myc amplification targets up	193	0.001001	0.140469
cheng imprinted by estradiol	107	0.00925926	0.162857					thum systolic heart failure up	404	0	0.140515
reactome rab gefs exchange gtp for gdp on rabs	89	0.0144778	0.162701					kegg peroxisome	78	0.00515464	0.140662
podar response to adaphostin up	145	0.0101215	0.162602					hahtola mycosis fungoides skin up	173	0.00100402	0.140851
reactome synthesis of pips at the plasma membrane	53	0.0227766	0.162534					martoriati mdm4 targets fetal liver up	226	0.00200401	0.141264
bild myc oncogenic signature	197	0.00100705	0.162548					biocarta hbx pathway	7	0.0474255	0.141125
pid ecadherin nascent aj pathway	39	0.0303688	0.162407					bonome ovarian cancer survival suboptimal debulking	488	0	0.14102
reactome nuclear envelope breakdown	53	0.025974	0.162372					boylan multiple myeloma c up	47	0.021322	0.141704
reactome diseases associated with glycosylation precursor biosynthesis	18	0.0315917	0.162232					biocarta caspase pathway	22	0.0399061	0.141556
dutertre estradiol response 6hr dn	90	0.0146138	0.16212					biocarta cdmac pathway	16	0.045067	0.141745
dang bound by myc	1036	0	0.162522					hooi st7 targets up	88	0.0103306	0.142086
charafe breast cancer basal vs mesenchymal up	117	0.0141844	0.162361					ikeda mir30 targets up	113	0.00705645	0.142677
hollmann apoptosis via cd40 dn	255	0	0.162481					browne hcmv infection 14hr up	152	0.0040201	0.142731
mariadason response to butyrate sulindac 6	45	0.0231278	0.162594					reactome regulated proteolysis of p75ntr	11	0.0461538	0.142781
martinez rb1 targets up	654	0	0.162877					pid foxm1 pathway	40	0.0194805	0.142785
sa b cell receptor complexes	24	0.028169	0.163692					pid s1p meta pathway	21	0.039627	0.143152
bakker foxo3 targets dn	166	0.00608519	0.163975					reactome cell cell junction organization	65	0.015544	0.143439
reactome signaling by receptor tyrosine kinases	468	0	0.164105					pedersen metastasis by erbb2 isoform 7	379	0	0.143955
pid ephb fwd pathway	40	0.0276549	0.164445					wacker hypoxia targets of vhl	13	0.0418204	0.144165
reactome gene expression transcription	1465	0	0.164311					ferreira ewings sarcoma unstable vs stable up	160	0.00603015	0.144074
kobayashi egfr signaling 6hr up	7	0.0373444	0.164338					reactome semaphorin interactions	64	0.0125	0.144007
reactome cristae formation	13	0.0426065	0.164408					biocarta ppara pathway	52	0.0263713	0.144152
reactome hedgehog on state	86	0.0188679	0.164782					reactome signaling by the b cell receptor bcr	110	0.010101	0.144429
bystroem correlated with il5 dn	57	0.0267666	0.164605					pid nfat 3pathway	53	0.0212089	0.144825
reactome mitotic spindle checkpoint	110	0.0102987	0.1645					farmer breast cancer apocrine vs luminal	318	0	0.145103
bhat esr1 targets not via akt1 dn	85	0.0166667	0.16433					manalo hypoxia up	197	0.00100402	0.145679
moreaux b lymphocyte maturation by taci dn	75	0.0188679	0.164347					reactome axon guidance	552	0	0.145698
reactome hedgehog ligand biogenesis	65	0.0210084	0.164688					reactome unfolded protein response upr	91	0.00816326	0.145661
senese hdac1 and hdac2 targets dn	217	0.00401204	0.164522					reactome rho gtpases activate paks	21	0.0399088	0.146127
kyng environmental stress response not by gamma in old	29	0.0486425	0.164548					kegg cysteine and methionine metabolism	34	0.0443459	0.146255
rickman tumor differentiated moderately vs poorly up	120	0.00914634	0.164456					reactome regulation of mitotic cell cycle	86	0.0122825	0.146381
reactome shc1 events in erbb2 signaling	22	0.04038	0.164369					yang breast cancer esr1 laser dn	46	0.0365591	0.146867
abbud lif signaling 2 dn	5	0.0359712	0.164409					reactome signaling by ntrks	99	0.00715015	0.146792
zhong response to azacitidine and tsa dn	69	0.0221753	0.164449					reactome apoptotic execution phase	52	0.0222458	0.146738
bystrykh hematopoiesis stem cell fgf3	6	0.0425824	0.164619					biocarta ras pathway	22	0.0258216	0.14661
inamura lung cancer scc subtypes up	14	0.0379902	0.164604					murakami uv response 6hr up	32	0.0334076	0.146648
reactome antigen activates b cell receptor bcr leading to generation of second messengers	30	0.0364465	0.164516					chen etv5 targets testis	23	0.0333717	0.146543
hinata nfkb targets keratinocyte dn	23	0.043943	0.164577					pid atm pathway	32	0.0368715	0.147244
kegg t cell receptor signaling pathway	108	0.00410678	0.164399					lee bmp2 targets up	738	0	0.147292
reactome regulation of pten stability and activity	69	0.0283019	0.164902					olsson e2f3 targets dn	38	0.0352035	0.147886
pellicciotta hdac in antigen presentation up	61	0.0203863	0.165199					mootha voxphos	73	0.0144628	0.147983
reactome asymmetric localization of pcp proteins	64	0.021097	0.165102					reactome regulation of pten stability and activity	69	0.0165119	0.148064
matsuda natural killer differentiation	458	0.001	0.164955					basso b lymphocyte network	143	0.00503018	0.148173
pid met pathway	79	0.0145682	0.164912					reactome g1 s dna damage checkpoints	67	0.0186916	0.148084
mcbryan pubertal tgfb1 targets up	158	0.00404449	0.164766					jison sickle cell disease dn	176	0.00200803	0.148487
reactome foxo mediated transcription of cell death genes	16	0.043956	0.16469					mayburd response to l663536 up	26	0.0316742	0.148795
watanabe colon cancer msi vs mss dn	64	0.0233051	0.164535					tien intestine probiotics 6hr up	50	0.0285714	0.148937
sesto response to uv c6	38	0.0405405	0.164679					martin viral gpcr signaling up	84	0.012333	0.148846
biocarta sam68 pathway	6	0.0383523	0.164607					rickman head and neck cancer e	83	0.0153689	0.148875
gross hypoxia via elk3 only dn	43	0.0386313	0.164751					pid ephrinb rev pathway	30	0.0220751	0.149271
kinsey targets of ewsr1 flii fusion up	1254	0	0.164906					reactome rora activates gene expression	18	0.045728	0.149587
west adrenocortical tumor dn	527	0	0.165149					bystroem correlated with il5 dn	57	0.0256137	0.149467
meissner es icp with h3k4me3 and h3k27me3	13	0.0381773	0.165105					rickman tumor differentiated well vs poorly dn	372	0	0.149407
reactome translocation of zap 70 to immunological synapse	16	0.0467405	0.16524					ivanova hematopoiesis late progenitor	488	0	0.149446
reactome golgi associated vesicle biogenesis	56	0.0216216	0.165455					reactome p75 ntr receptor mediated signalling	97	0.0142132	0.149594
biocarta igf1r pathway	23	0.0454002	0.165349					biocarta fcer1 pathway	39	0.016129	0.149684
kegg graft versus host disease	37	0.0349493	0.165659					reactome nuclear events kinase and transcription factor activation	25	0.032992	0.150104
zwang class 1 transiently induced by egf	484	0	0.165663					reactome orc1 removal from chromatin	71	0.0207039	0.150034
reactome sumoylation of dna methylation proteins	16	0.0475	0.165581					chang pou5f1 targets up	14	0.0365239	0.150061
concannon apoptosis by epoxomicin up	235	0	0.166454					nuytten ezh2 targets up	1006	0	0.150007
reactome regulation of runx1 expression and activity	17	0.0347305	0.166471					reactome sos mediated signalling	7	0.041958	0.150462
pasqualucci lymphoma by gc stage dn	165	0.0060241	0.166594					zhan multiple myeloma subgroups	30	0.0307167	0.1503
gautschi src signaling	8	0.0312057	0.166583					mcbryan pubertal breast 6 7wk up	181	0.00300903	0.151418
elvidge hif1a targets up	66	0.0285412	0.166501					durchdewald skin carcinogenesis dn	253	0	0.151659
pid integrin a4b1 pathway	33	0.0382452	0.166352					rashi response to ionizing radiation 4	47	0.0308511	0.151743
sesto response to uv c5	46	0.0281081	0.166522					lastowska coamplified with mycn	38	0.0369967	0.152497
reactome interleukin 1 signaling	102	0.0124095	0.166989					lee calorie restriction muscle dn	44	0.0340064	0.152433
reactome receptor mediated mitophagy	11	0.0437018	0.167123					reactome phosphorylation of the apc c	19	0.0438909	0.152543
biocarta il2 pathway	22	0.0401891	0.167096					biocarta terc pathway	6	0.0393013	0.152655
reactome signaling by nodal	20	0.0421687	0.166947					welcsh brca1 targets up	194	0.002002	0.1526
seiden oncogenesis by met	88	0.018595	0.166892					kyng werner syndrom up	14	0.0305998	0.152467
reactome hiv elongation arrest and recovery	36	0.0396913	0.167056					johnstone parvb targets 2 up	143	0.0040201	0.152355
reactome platelet sensitization by ldl	17	0.0439024	0.166956					biocarta integrin pathway	34	0.0407489	0.152353
reactome axon guidance	552	0	0.167007					sesto response to uv c5	46	0.026738	0.152441
bosco interferon induced antiviral module	74	0.0272251	0.166911					reactome foxo mediated transcription of cell death genes	16	0.0493976	0.152505
biocarta insulin pathway	21	0.0404762	0.166807					kegg glioma	65	0.0209205	0.152751
white neuroblastoma with 1p36.3 deletion	19	0.04375	0.166641					mohankumar hoxa1 targets up	398	0	0.152828
pid tgfbr pathway	53	0.0386266	0.16673					biocarta fmlp pathway	34	0.0346696	0.152787
burton adipogenesis 7	46	0.0221239	0.166592					yao temporal response to progesterone cluster 11	98	0.00917431	0.152675
reactome beta catenin phosphorylation cascade	17	0.0409938	0.166782					lopes methylated in colon cancer dn	28	0.0397196	0.152607
vecchi gastric cancer early up	415	0	0.166944					cheng response to nickel acetate	42	0.0255319	0.152528
rutella response to hgf dn	231	0.00100503	0.166973					reactome translesion synthesis by polh	19	0.040146	0.152604
biocarta pyk2 pathway	27	0.0331808	0.167106					ferrando t all with mll enl fusion dn	86	0.00919305	0.152806
sweet lung cancer kras up	447	0	0.167536					reactome association of tric cct with target proteins during biosynthesis	39	0.0305344	0.152952
huttmann b cll poor survival dn	57	0.0225806	0.16771					enk uv response epidermis up	291	0	0.15348
wong endmetrium cancer up	24	0.0475087	0.167715					cheng imprinted by estradiol	107	0.0111562	0.153649
mellman tut1 targets up	20	0.0399516	0.167657					reactome rho gtpase effectors	320	0	0.153531
rizki tumor invasiveness 2d dn	59	0.0226537	0.167913					kegg pentose and glucuronate interconversions	28	0.040678	0.153368
bidus metastasis up	214	0.00600601	0.168114					biocarta death pathway	29	0.0329545	0.153204
rashi response to ionizing radiation 5	129	0.0122699	0.168253					mikkelsen npc icp with h3k27me3	12	0.0423412	0.153087
fernandez bound by myc	179	0.00604839	0.168188					zhou cell cycle genes in ir response 24hr	122	0.00605449	0.153213
sasson response to forskolin dn	85	0.0167015	0.168162					rashi response to ionizing radiation 3	44	0.0289389	0.153396
gross hypoxia via elk3 and hif1a up	138	0.00404858	0.168222					choi atl chronic vs acute dn	18	0.0358852	0.153345
gabriely mir21 targets	285	0.002002	0.168058					leonard hypoxia	42	0.034188	0.153906
reactome intra golgi and retrograde golgi to er traffic	201	0.00201207	0.168452					mcbryan pubertal tgfb1 targets up	158	0.00502513	0.154214
reactome sema3a pak dependent axon repulsion	16	0.0334158	0.168276					ouillette cll 13q14 deletion up	72	0.0217842	0.154231
georges cell cycle mir192 targets	58	0.0270856	0.168335					kegg biosynthesis of unsaturated fatty acids	22	0.0488941	0.154291
reactome arachidonic acid metabolism	58	0.0330138	0.168534					kokkinakis methionine deprivation 96hr up	118	0.00809717	0.154238
jison sickle cell disease up	180	0.00604839	0.169036					enk uv response epidermis dn	507	0	0.154562
pid il3 pathway	26	0.0450867	0.169269					bernard ppapdc1b targets dn	55	0.0323929	0.154419
gnatenko platelet signature	44	0.0384615	0.169152					reactome branched chain amino acid catabolism	19	0.0360577	0.154465
kim wt1 targets 8hr dn	120	0.012333	0.169028					reactome diseases of signal transduction	385	0	0.154351
lei myb targets	316	0	0.168971					zhou inflammatory response fima dn	262	0.001	0.154224
pid myc pathway	25	0.0446009	0.168825					kegg amyotrophic lateral sclerosis als	53	0.0251836	0.154162
kaab heart atrium vs ventricle dn	257	0.00100301	0.16954					pasini suz12 targets dn	300	0	0.154385
ginestier breast cancer znf217 amplified up	68	0.0283613	0.169727					bidus metastasis dn	142	0.00403633	0.15467
reactome tcr signaling	114	0.01222	0.16972					seiden oncogenesis by met	88	0.0174717	0.154754
rankin angiogenic targets of vhl hif2a up	5	0.0356633	0.16979					biocarta gleevec pathway	23	0.033105	0.154612
reactome sema4d in semaphorin signaling	24	0.0414692	0.170177					fortschegger phf8 targets dn	759	0	0.154946
kegg biosynthesis of unsaturated fatty acids	22	0.0381944	0.170231					rodrigues dcc targets dn	117	0.00507099	0.155211
lu ezh2 targets up	269	0.00100301	0.17015					reactome trif ticam1 mediated tlr4 signaling	97	0.0153531	0.155157
blum response to salirasib up	243	0.0020141	0.170107					yagi aml relapse prognosis	34	0.0296053	0.155185
smith liver cancer	47	0.0271739	0.169953					reactome nef mediated cd8 down regulation	7	0.0459921	0.155404
rickman tumor differentiated well vs moderately dn	110	0.016546	0.170408					gozgit esr1 targets up	140	0.00502513	0.15567
kegg steroid hormone biosynthesis	55	0.0323625	0.170497					greshock cancer copy number up	315	0	0.155703
pid tap63 pathway	54	0.029819	0.170443					verhaak glioblastoma mesenchymal	215	0.001	0.155595
der ifn gamma response up	71	0.0265957	0.170705					biocarta gsk3 pathway	20	0.0340376	0.155573
charafe breast cancer luminal vs mesenchymal dn	452	0	0.170737					shepard crush and burn mutant up	199	0.002002	0.155711
reactome programmed cell death	177	0.00609137	0.170855					weigel oxidative stress by hne and h2o2	36	0.0344456	0.15581
blalock alzheimers disease incipient up	376	0	0.170761					reactome stabilization of p53	56	0.0303347	0.155953
kokkinakis methionine deprivation 96hr up	118	0.0193878	0.170586					biocarta erk pathway	27	0.0366667	0.155821
zhu cmv all dn	117	0.0152905	0.170763					teramoto opn targets cluster 7	18	0.0447059	0.155758
pid il2 pi3k pathway	34	0.0435754	0.170746					scibetta kdm5b targets dn	78	0.0205339	0.155653
martinez rb1 and tp53 targets dn	563	0	0.170778					gentile uv low dose dn	63	0.0262881	0.155515
reactome pka activation in glucagon signalling	17	0.0468557	0.170613					tarte plasma cell vs b lymphocyte dn	38	0.0294118	0.155512
molenaar targets of ccnd1 and cdk4 up	63	0.0263713	0.170669					reactome disassembly of the destruction complex and recruitment of axin to the membrane	31	0.0379464	0.155558
meissner brain hcp with h3k27me3	262	0.001001	0.170562					sesto response to uv c6	38	0.0454545	0.155486
reactome assembly of the pre replicative complex	68	0.0213675	0.170593					reactome vegfr2 mediated cell proliferation	19	0.0379597	0.15574
pid ar pathway	61	0.0295047	0.171286					kegg gnrh signaling pathway	101	0.00814664	0.155618
reactome protein protein interactions at synapses	87	0.0135983	0.17114					reactome fanconi anemia pathway	39	0.0345946	0.155567
reactome orc1 removal from chromatin	71	0.0275132	0.171126					reactome glycolysis	72	0.0164779	0.15607
reactome met activates ras signaling	11	0.0465116	0.171334					mizushima autophagosome formation	22	0.037844	0.156077
rashi response to ionizing radiation 4	47	0.0360656	0.171185					sa fas signaling	9	0.0464191	0.15594
kegg porphyrin and chlorophyll metabolism	41	0.0352811	0.171751					biocarta ndkdynamin pathway	17	0.0480657	0.155951
clasper lymphatic vessels during metastasis up	19	0.0481928	0.171933					reactome copi mediated anterograde transport	101	0.0142421	0.155803
ivanova hematopoiesis stem cell and progenitor	539	0	0.171849					pid bcr 5pathway	63	0.0229406	0.155736
welcsh brca1 targets up	194	0.0030303	0.171742					coulouarn temporal tgfb1 signature up	108	0.0172764	0.15565
enk uv response epidermis dn	507	0	0.171736					mitsiades response to aplidin up	427	0	0.156202
kyng environmental stress response not by gamma in ws	30	0.0435754	0.171798					biocarta tcr pathway	44	0.025	0.156261
chandran metastasis dn	304	0.00100301	0.171784					delacroix rarg bound mef	356	0	0.156138
ding lung cancer expression by copy number	100	0.011236	0.172053					pid rb 1pathway	65	0.0216495	0.156041
kegg erbb signaling pathway	87	0.0177453	0.171991					schaeffer sox9 targets in prostate development dn	44	0.0192102	0.156066
reactome regulation of pten gene transcription	60	0.0300107	0.172018					kegg phosphatidylinositol signaling system	76	0.0237849	0.156453
mariadason regulated by histone acetylation up	56	0.0373932	0.172548					vantveer breast cancer esr1 dn	264	0.001	0.1565
kegg small cell lung cancer	84	0.016546	0.172787					rodwell aging kidney no blood up	207	0.00400802	0.156633
reactome metabolism of amino acids and derivatives	371	0	0.172751					zhan multiple myeloma cd1 and cd2 dn	54	0.0244681	0.156527
petrova endothelium lymphatic vs blood dn	161	0.00704225	0.172861					zhan multiple myeloma up	59	0.0258799	0.156626
rutella response to hgf vs csf2rb and il4 dn	241	0.00301811	0.172956					lu ezh2 targets up	269	0.001	0.156555
reactome e2f enabled inhibition of pre replication complex formation	9	0.0411687	0.172992					gross hypoxia via elk3 and hif1a up	138	0.00401606	0.156501
ikeda mir30 targets up	113	0.0112245	0.173105					coldren gefitinib resistance up	82	0.0216272	0.156388
reactome degradation of dvl	57	0.031016	0.172957					roylance breast cancer 16q copy number up	60	0.0168244	0.156574
smid breast cancer luminal b dn	540	0	0.173032					reactome cellular senescence	192	0.00200401	0.156456
rodwell aging kidney no blood dn	138	0.00506586	0.172923					mariadason response to butyrate curcumin sulindac tsa 8	9	0.0487805	0.157116
nutt gbm vs ao glioma up	46	0.0351648	0.173138					reactome antigen processing cross presentation	98	0.00818833	0.157185
reactome beta catenin independent wnt signaling	143	0.00606673	0.173052					roessler liver cancer metastasis up	106	0.00814664	0.157087
reactome other interleukin signaling	288	0	0.173147					farmer breast cancer basal vs lulminal	321	0.001	0.157151
rozanov mmp14 targets subset	32	0.0489749	0.173039					reactome cargo concentration in the er	33	0.0380313	0.157017
kim wt1 targets 12hr up	163	0.0030303	0.172982					reactome protein folding	101	0.0192503	0.156867
gentile response cluster d3	49	0.0301399	0.172738					baker hematopoesis stat5 targets	6	0.0411932	0.157169
rutella response to csf2rb and il4 dn	315	0.001	0.173974					elvidge hypoxia by dmog up	132	0.00707071	0.157057
reactome m phase	391	0.002002	0.173813					reactome kinesins	59	0.0302714	0.156902
reactome eicosanoids	12	0.0471939	0.173693					nagy pcaf components human	9	0.0418848	0.156798
zhan multiple myeloma ms dn	43	0.0375537	0.173609					cui tcf21 targets 2 up	405	0	0.156737
shank tal1 targets dn	10	0.0396927	0.173804					delpuech foxo3 targets dn	38	0.0366775	0.156676
browne hcmv infection 6hr dn	158	0.00704225	0.17373					lim mammary luminal mature up	108	0.0111111	0.156982
shepard crush and burn mutant up	199	0.00505051	0.17377					reactome signalling to ras	20	0.0463499	0.156979
klein targets of bcr abl1 fusion	45	0.0368764	0.173627					gentile uv high dose dn	280	0.001001	0.157435
wu cell migration	181	0.00704225	0.173589					reactome cd209 dc sign signaling	21	0.0455076	0.157926
dorsam hoxa9 targets up	35	0.0429379	0.17352					charafe breast cancer luminal vs basal dn	439	0	0.15794
landis erbb2 breast tumors 324 up	145	0.00506073	0.173382					hollmann apoptosis via cd40 dn	255	0.002	0.158695
zwang egf interval up	87	0.0197711	0.173154					whitfield cell cycle m g1	127	0.00907258	0.158661
kegg pentose and glucuronate interconversions	28	0.0481651	0.173008					biocarta sppa pathway	16	0.0486618	0.158896
biocarta atm pathway	20	0.0429975	0.17306					tcga glioblastoma copy number up	71	0.0321911	0.159286
jazaeri breast cancer brca1 vs brca2 up	48	0.0351648	0.173257					reactome activation of nf kappab in b cells	67	0.0289256	0.159344
zhu cmv 8 hr dn	49	0.0323974	0.17319					reactome miscellaneous transport and binding events	26	0.0440181	0.159343
kim liver cancer poor survival up	22	0.0481348	0.173561					papaspyridonos unstable aterosclerotic plaque dn	40	0.0286929	0.159257
pid telomerase pathway	67	0.02079	0.17378					gentile uv response cluster d9	26	0.0353478	0.159199
pid kit pathway	52	0.0290635	0.173729					reactome dna double strand break repair	164	0.00201005	0.159413
pasqualucci lymphoma by gc stage up	276	0.00100402	0.173605					zhan multiple myeloma hp dn	46	0.0331551	0.159302
haddad b lymphocyte progenitor	275	0	0.17375					yao temporal response to progesterone cluster 12	77	0.0332295	0.159242
fischer g2 m cell cycle	233	0.00301811	0.175043					samols targets of khsv mirnas dn	57	0.031185	0.159289
browne hcmv infection 14hr up	152	0.00608519	0.175277					browne hcmv infection 18hr up	168	0.00403226	0.159337
reactome syndecan interactions	27	0.0447761	0.175495					vantveer breast cancer esr1 up	205	0.003	0.15919
ouellet cultured ovarian cancer invasive vs lmp up	69	0.0322245	0.175453					gargalovic response to oxidized phospholipids grey dn	75	0.0216718	0.15922
reactome cellular response to hypoxia	75	0.0283613	0.175633					setlur prostate cancer tmprss2 erg fusion up	66	0.0238342	0.159128
wamunyokoli ovarian cancer grades 1 2 dn	68	0.0337553	0.175964					honrado breast cancer brca1 vs brca2	18	0.0488677	0.159945
welcsh brca1 targets dn	139	0.0132383	0.175862					mili pseudopodia	46	0.0274551	0.159817
bild ctnnb1 oncogenic signature	76	0.0189274	0.176089					montero thyroid cancer poor survival up	12	0.0441919	0.159663
reactome macroautophagy	90	0.0248447	0.175991					reactome mitochondrial trna aminoacylation	21	0.042007	0.159987
reactome signaling by fgfr	87	0.0238589	0.176246					rickman tumor differentiated well vs poorly up	234	0.001	0.159878
petretto heart mass qtl cis up	32	0.0436242	0.176121					reactome assembly of the orc complex at the origin of replication	6	0.048913	0.160044
plasari tgfb1 targets 10hr dn	246	0	0.17609					gaussmann mll af4 fusion targets a up	188	0.00200602	0.160296
amundson response to arsenite	214	0.00504541	0.176211					bruins uvc response late	1080	0	0.160316
reactome cell junction organization	92	0.0145833	0.176082					gaussmann mll af4 fusion targets c up	161	0.006	0.160294
fournier acinar development late 2	280	0.002002	0.175929					reactome signaling by scf kit	43	0.0334052	0.160189
perez tp63 targets	337	0.002002	0.176107					pid il8 cxcr2 pathway	34	0.0395604	0.160153
pid foxm1 pathway	40	0.0429515	0.17629					kegg arginine and proline metabolism	54	0.0261506	0.160739
reactome dna repair	329	0.001002	0.176207					reactome regulation of hsf1 mediated heat shock response	82	0.0153846	0.160686
rodwell aging kidney dn	136	0.00822199	0.176095					scibetta kdm5b targets up	19	0.0484262	0.161457
xu gh1 autocrine targets dn	128	0.0163099	0.176092					reactome translocation of slc2a4 glut4 to the plasma membrane	71	0.0227038	0.161478
fulcher inflammatory response lectin vs lps dn	434	0.001	0.175953					reactome signaling by wnt in cancer	34	0.0359147	0.161457
vanasse bcl2 targets up	29	0.0488082	0.176145					lindgren bladder cancer cluster 1 dn	372	0	0.161642
wamunyokoli ovarian cancer grades 1 2 up	137	0.0122324	0.176201					reactome biosynthesis of specialized proresolving mediators spms	19	0.0425777	0.161779
gruetzmann pancreatic cancer up	341	0.001002	0.17732					jiang hypoxia cancer	58	0.028451	0.162151
biocarta p38mapk pathway	36	0.0402685	0.177692					molenaar targets of ccnd1 and cdk4 up	63	0.0271682	0.162355
li wilms tumor vs fetal kidney 1 dn	161	0.0101937	0.177592					farmer breast cancer apocrine vs basal	321	0	0.162346
chandran metastasis top50 up	36	0.0482063	0.177535					reactome clec7a dectin 1 signaling	100	0.0121951	0.162507
kegg ecm receptor interaction	84	0.028451	0.177418					thum systolic heart failure dn	182	0.00601805	0.162783
dazard response to uv scc dn	110	0.0268595	0.177358					pid il2 stat5 pathway	30	0.0389755	0.162678
riggins tamoxifen resistance dn	215	0.00502008	0.177813					podar response to adaphostin up	145	0.00202224	0.162761
kyng response to h2o2 via ercc6 dn	44	0.0423634	0.178836					reactome regulation of mrna stability by proteins that bind au rich elements	87	0.0244399	0.162966
rodrigues dcc targets dn	117	0.010352	0.178675					reactome hdms demethylate histones	48	0.042328	0.163104
enk uv response keratinocyte up	527	0	0.178574					pece mammary stem cell dn	133	0.00604839	0.162979
reactome protein localization	160	0.0122075	0.178827					reactome copi dependent golgi to er retrograde traffic	98	0.0132924	0.163221
reactome metabolism of lipids	728	0	0.179195					reactome telomere c strand lagging strand synthesis	24	0.0438799	0.163326
farmer breast cancer basal vs lulminal	321	0.00100301	0.179317					reactome epigenetic regulation of gene expression	146	0.0130916	0.163083
goldrath homeostatic proliferation	141	0.0142421	0.179539					reactome inositol phosphate metabolism	48	0.0394036	0.16349
kinsey targets of ewsr1 flii fusion dn	320	0.002	0.179833					pid hedgehog gli pathway	48	0.0286624	0.163627
lindgren bladder cancer cluster 2a dn	138	0.0152594	0.179765					smirnov response to ir 6hr dn	112	0.0121827	0.163611
reactome regulation of mrna stability by proteins that bind au rich elements	87	0.0215164	0.179778					reactome fbxl7 down regulates aurka during mitotic entry and in early mitosis	55	0.0368034	0.163613
landis erbb2 breast tumors 324 dn	147	0.0101215	0.179978					pid tcptp pathway	42	0.0454054	0.163632
lu aging brain up	257	0.00401204	0.179938					reactome negative regulation of mapk pathway	40	0.0393013	0.163719
nikolsky breast cancer 7q21 q22 amplicon	74	0.0294427	0.17986					johansson gliomagenesis by pdgfb up	53	0.0355649	0.164076
pid rac1 reg pathway	38	0.0405257	0.179706					reactome apc c:cdc20 mediated degradation of cyclin b	23	0.0417633	0.163971
boylan multiple myeloma c cluster dn	28	0.0465909	0.179569					concannon apoptosis by epoxomicin up	235	0.00200401	0.164063
kegg progesterone mediated oocyte maturation	85	0.0324607	0.179944					reactome regulation of apoptosis	53	0.0357143	0.164173
vanharanta uterine fibroid with 7q deletion dn	36	0.036405	0.180106					wamunyokoli ovarian cancer lmp dn	191	0.005005	0.16433
asgharzadeh neuroblastoma poor survival dn	41	0.0389755	0.180587					reactome nuclear envelope breakdown	53	0.0304942	0.164726
horiuchi wtap targets dn	307	0.001001	0.180458					zhang breast cancer progenitors dn	129	0.0120846	0.164614
miyagawa targets of ewsr1 ets fusions up	258	0.00201005	0.180765					kannan tp53 targets up	57	0.0315789	0.164677
rutella response to hgf vs csf2rb and il4 up	406	0	0.181216					bakker foxo3 targets dn	166	0.00503018	0.164553
benporath es 1	375	0	0.181215					pid lymph angiogenesis pathway	25	0.0407701	0.164473
shaffer irf4 targets in activated b lymphocyte	78	0.0332986	0.181535					landis erbb2 breast tumors 324 dn	147	0.0100402	0.164665
winter hypoxia metagene	235	0.00503018	0.18197					jazag tgfb1 signaling dn	34	0.0359869	0.164522
wang response to bexarotene up	34	0.0401786	0.181788					biocarta fas pathway	30	0.0497238	0.164873
reactome interleukin 1 family signaling	139	0.00610998	0.181627					reactome extension of telomeres	30	0.0484581	0.164893
reactome toll like receptor 9 tlr9 cascade	95	0.0249221	0.181589					coates macrophage m1 vs m2 dn	75	0.0259336	0.164747
acevedo normal tissue adjacent to liver tumor up	166	0.0111111	0.181629					zhan early differentiation genes dn	42	0.0441335	0.165039
browne hcmv infection 12hr dn	97	0.0124224	0.181772					nadler hyperglycemia at obesity	57	0.0260146	0.165372
kegg acute myeloid leukemia	57	0.0462366	0.182088					shaffer irf4 targets in activated b lymphocyte	78	0.0164271	0.16531
reactome myd88 cascade initiated on plasma membrane	84	0.0283912	0.182109					goldrath immune memory	63	0.0221987	0.165685
boudoukha bound by igf2bp2	96	0.0218295	0.182463					pid angiopoietin receptor pathway	49	0.0377754	0.165727
yamashita liver cancer with epcam up	52	0.0419355	0.18264					alfano myc targets	232	0.00200401	0.165801
yao temporal response to progesterone cluster 0	67	0.0295359	0.182529					petrova endothelium lymphatic vs blood dn	161	0.00601202	0.16628
croonquist il6 deprivation dn	95	0.0196687	0.182528					dacosta uv response via ercc3 ttd up	59	0.0292276	0.166318
kegg focal adhesion	199	0.00402414	0.182453					zhou cell cycle genes in ir response 6hr	82	0.0143737	0.166331
reactome neurexins and neuroligins	56	0.0373533	0.182353					firestein proliferation	162	0.00702106	0.166541
sansom apc targets require myc	212	0.00502513	0.182298					yao temporal response to progesterone cluster 0	67	0.0342324	0.166717
whitfield cell cycle g2 m	199	0.00502513	0.182368					der ifn beta response up	102	0.0203046	0.16671
sung metastasis stroma up	108	0.0173116	0.182238					qi hypoxia targets of hif1a and foxa2	32	0.0384193	0.166771
brueckner targets of mirlet7a3 dn	73	0.0337553	0.182832					basso cd40 signaling up	101	0.0152594	0.166809
ross aml with aml1 eto fusion	77	0.0250522	0.182844					kegg t cell receptor signaling pathway	108	0.0182371	0.167255
ouellet ovarian cancer invasive vs lmp up	113	0.0227508	0.182917					sesto response to uv c0	108	0.0121457	0.1674
provenzani metastasis dn	140	0.0162602	0.183149					matsuda natural killer differentiation	458	0	0.167455
berenjeno transformed by rhoa up	528	0	0.183249					fortschegger phf8 targets up	259	0.002002	0.167978
zheng foxp3 targets in thymus up	190	0.00605449	0.183497					shaffer irf4 targets in myeloma vs mature b lymphocyte	99	0.0162437	0.168294
wang barretts esophagus up	53	0.0409042	0.183796					kegg base excision repair	33	0.0488346	0.16841
reactome cross presentation of soluble exogenous antigens endosomes	49	0.0430464	0.183603					krieg kdm3a targets not hypoxia	191	0.004004	0.168556
reactome g alpha 12 13 signalling events	79	0.0262055	0.183647					mili pseudopodia chemotaxis up	79	0.0268318	0.168446
shedden lung cancer poor survival a6	448	0	0.183567					dutertre estradiol response 6hr up	224	0.00100301	0.168917
landis erbb2 breast preneoplastic dn	57	0.0340788	0.18351					sasson response to forskolin dn	85	0.0224719	0.1697
diaz chronic meylogenous leukemia dn	113	0.0196484	0.184187					reactome assembly of the pre replicative complex	68	0.0310881	0.170016
bruins uvc response late	1080	0	0.18405					gazda diamond blackfan anemia progenitor dn	64	0.026971	0.170241
chng multiple myeloma hyperploid up	53	0.043573	0.18384					yamazaki tceb3 targets dn	189	0.007	0.170173
korkola seminoma up	41	0.0375691	0.184181					kegg huntingtons disease	166	0.00502008	0.170156
roessler liver cancer metastasis up	106	0.0226337	0.184046					biocarta lymphocyte pathway	9	0.043883	0.170255
sesto response to uv c0	108	0.0266393	0.183982					benporath nos targets	174	0.00100402	0.170524
dutertre estradiol response 24hr up	318	0.002	0.183913					nakamura tumor zone peripheral vs central dn	598	0	0.1707
reactome toll like receptor tlr1:tlr2 cascade	97	0.0299278	0.184021					reactome toll like receptor cascades	153	0.0100402	0.171269
kegg ubiquitin mediated proteolysis	132	0.00913706	0.184111					burton adipogenesis 6	187	0.002002	0.171348
pid hedgehog gli pathway	48	0.0484048	0.183985					reactome dectin 1 mediated noncanonical nf kb signaling	62	0.0263992	0.172482
senese hdac1 targets up	429	0	0.183949					gentile response cluster d3	49	0.0391121	0.172251
hoebeke lymphoid stem cell up	89	0.0260146	0.184047					kauffmann dna replication genes	145	0.0141557	0.17225
boylan multiple myeloma c up	47	0.0412595	0.183948					ivanovska mir106b targets	87	0.0265849	0.172137
charafe breast cancer basal vs mesenchymal dn	51	0.0463862	0.18437					kaab heart atrium vs ventricle up	252	0.001002	0.171992
reactome downstream tcr signaling	94	0.0197711	0.184224					rhodes undifferentiated cancer	68	0.0303983	0.171961
amit serum response 240 mcf10a	54	0.0426439	0.184106					zwang down by 2nd egf pulse	241	0.005	0.171843
browne hcmv infection 18hr dn	173	0.0181269	0.184					nutt gbm vs ao glioma up	46	0.0451207	0.171835
reactome rho gtpases activate formins	138	0.0142276	0.18388					gazda diamond blackfan anemia erythroid dn	438	0	0.172544
martens bound by pml rara fusion	429	0.001	0.183809					wierenga pml interactome	41	0.045204	0.172655
kegg fc epsilon ri signaling pathway	79	0.030303	0.18372					pid erbb1 downstream pathway	105	0.0152594	0.173261
han satb1 targets dn	376	0.001	0.183599					pid tap63 pathway	54	0.0331906	0.173258
reactome resolution of sister chromatid cohesion	125	0.017294	0.183963					wamunyokoli ovarian cancer grades 1 2 dn	68	0.0260146	0.173232
reactome autophagy	109	0.0224949	0.18383					gargalovic response to oxidized phospholipids blue up	130	0.0131181	0.173176
boyault liver cancer subclass g123 dn	50	0.0454054	0.183903					reactome interleukin 17 signaling	71	0.0381443	0.173873
burton adipogenesis 6	187	0.0040568	0.184073					wang response to forskolin up	21	0.0487239	0.173906
martoriati mdm4 targets fetal liver up	226	0.00200803	0.18457					senese hdac1 and hdac2 targets dn	217	0.00400802	0.17403
martinez tp53 targets dn	565	0	0.184522					zhu cmv 8 hr dn	49	0.0455508	0.173957
lee differentiating t lymphocyte	182	0.00907258	0.18452					aston major depressive disorder dn	156	0.00504032	0.174038
reactome metabolism of water soluble vitamins and cofactors	121	0.0153531	0.184618					holleman asparaginase resistance b all up	26	0.0476731	0.174825
winter hypoxia up	94	0.0247934	0.185146					winter hypoxia up	94	0.013306	0.17461
reactome immunoregulatory interactions between a lymphoid and a non lymphoid cell	127	0.0142276	0.185438					huang dasatinib resistance dn	69	0.0268595	0.174584
florio neocortex basal radial glia dn	186	0.00704935	0.185413					kegg lysosome	121	0.021148	0.17461
bertucci medullary vs ductal breast cancer dn	170	0.0101317	0.186758					lu ezh2 targets dn	376	0	0.174541
greshock cancer copy number up	315	0	0.187049					elvidge hypoxia up	169	0.00801603	0.174486
lin apc targets	70	0.035865	0.187052					dittmer pthlh targets dn	69	0.0235897	0.174367
rutella response to hgf up	416	0.001	0.187004					reactome interleukin 3 interleukin 5 and gm csf signaling	48	0.0465368	0.174436
zhang response to cantharidin dn	63	0.0402969	0.187104					gotzmann epithelial to mesenchymal transition dn	195	0.01002	0.174414
reactome p75 ntr receptor mediated signalling	97	0.0256673	0.187061					bacolod resistance to alkylating agents dn	52	0.0479167	0.174496
rodrigues ntn1 targets dn	155	0.0161453	0.187475					lee liver cancer survival dn	175	0.00702811	0.174875
sig pip3 signaling in cardiac myoctes	67	0.0359408	0.187462					martens tretinoin response dn	770	0	0.174848
coldren gefitinib resistance up	82	0.0238589	0.187258					hollern emt breast tumor dn	118	0.0183299	0.174596
reactome activation of the mrna upon binding of the cap binding complex and eifs and subsequent binding to 43s	60	0.0466377	0.187622					oishi cholangioma stem cell like dn	269	0.002002	0.174822
gargalovic response to oxidized phospholipids blue up	130	0.0182186	0.187708					turashvili breast ductal carcinoma vs lobular normal up	71	0.0227508	0.174855
dazard uv response cluster g6	139	0.0183299	0.188387					rutella response to hgf up	416	0	0.175238
lin npas4 targets up	162	0.0191532	0.1884					zhan multiple myeloma cd1 vs cd2 dn	50	0.0393199	0.175301
kyng environmental stress response up	51	0.044181	0.188303					reactome fceri mediated caplus2 mobilization	31	0.0486188	0.175246
reactome translocation of slc2a4 glut4 to the plasma membrane	71	0.0270552	0.188582					brueckner targets of mirlet7a3 dn	73	0.0291971	0.175514
reactome regulation of hsf1 mediated heat shock response	82	0.0363071	0.188722					sig pip3 signaling in cardiac myoctes	67	0.0261233	0.175397
lee liver cancer survival dn	175	0.0110553	0.189433					mariadason regulated by histone acetylation up	56	0.0265111	0.175443
pid ret pathway	39	0.0482604	0.189491					reactome metabolism of vitamins and cofactors	187	0.01002	0.175399
pangas tumor suppression by smad1 and smad5 dn	142	0.0111336	0.18948					kobayashi egfr signaling 24hr dn	251	0.005005	0.175454
elvidge hif1a and hif2a targets dn	104	0.0276639	0.189451					stark prefrontal cortex 22q11 deletion up	190	0.00402414	0.175608
mohankumar hoxa1 targets up	398	0.001	0.189319					cairo liver development up	160	0.00902708	0.176009
reactome opioid signalling	87	0.0259875	0.189461					pomeroy medulloblastoma prognosis up	47	0.0453074	0.176139
blum response to salirasib dn	333	0.004004	0.189416					pid ptp1b pathway	52	0.0339703	0.176297
zhan multiple myeloma cd1 dn	44	0.0410655	0.189177					reactome intracellular signaling by second messengers	302	0.001	0.176328
farmer breast cancer apocrine vs luminal	318	0.00400802	0.189152					west adrenocortical carcinoma vs adenoma up	19	0.0494118	0.176638
kayo calorie restriction muscle up	93	0.0268873	0.189101					pid kit pathway	52	0.0455026	0.17675
gavin foxp3 targets cluster p3	156	0.0141844	0.189417					beier glioma stem cell dn	65	0.0320579	0.176777
ueda central clock	85	0.0275424	0.189421					kegg ubiquitin mediated proteolysis	132	0.0191919	0.176635
koyama sema3b targets up	246	0.00701403	0.189738					senese hdac3 targets up	468	0	0.176773
reactome generic transcription pathway	1206	0	0.189834					rizki tumor invasiveness 3d up	206	0.0040282	0.176592
kegg cell cycle	124	0.0164271	0.189972					fridman senescence up	74	0.0279793	0.176161
reactome cell cell communication	128	0.0172065	0.189715					haddad b lymphocyte progenitor	275	0	0.176706
liu vmyb targets up	121	0.0204918	0.189896					lin apc targets	70	0.0350515	0.176787
reactome the role of gtse1 in g2 m progression after g2 checkpoint	78	0.0283316	0.189745					amundson response to arsenite	214	0.00702811	0.177705
kegg alzheimers disease	151	0.0122075	0.190273					tarte plasma cell vs b lymphocyte up	78	0.0310238	0.177525
alcalay aml by npm1 localization up	137	0.0182186	0.190294					reactome tbc rabgaps	43	0.0402116	0.177456
zamora nos2 targets dn	77	0.0311526	0.190581					sesto response to uv c8	70	0.0373444	0.177456
reactome protein folding	101	0.0257998	0.190621					rutella response to csf2rb and il4 up	332	0	0.177349
shaffer irf4 targets in myeloma vs mature b lymphocyte	99	0.0308008	0.190714					coates macrophage m1 vs m2 up	81	0.0277207	0.177364
reactome metabolism of polyamines	59	0.0465368	0.19068					reactome synthesis of pips at the plasma membrane	53	0.0414894	0.177692
qi plasmacytoma up	248	0.00401606	0.190742					ouellet ovarian cancer invasive vs lmp up	113	0.0233503	0.178125
biocarta il2rb pathway	37	0.0414334	0.190481					hirsch cellular transformation signature up	240	0.002002	0.178183
pid nfat 3pathway	53	0.0448718	0.190566					reactome vif mediated degradation of apobec3g	54	0.0282427	0.178118
der ifn alpha response up	73	0.0431579	0.190243					sengupta nasopharyngeal carcinoma up	296	0.004	0.178762
reactome regulation of mitotic cell cycle	86	0.0323929	0.190182					colina targets of 4ebp1 and 4ebp2	340	0.002	0.178724
delacroix rarg bound mef	356	0	0.190045					mikkelsen mcv6 icp with h3k27me3	74	0.045082	0.178622
kegg proteasome	44	0.0444686	0.189915					ray tumorigenesis by erbb2 cdc25a dn	251	0.00701403	0.179005
schuhmacher myc targets up	79	0.0333681	0.190048					wang targets of mll cbp fusion dn	43	0.04371	0.178957
sig insulin receptor pathway in cardiac myocytes	51	0.0476191	0.189974					blalock alzheimers disease incipient up	376	0.001	0.178929
tcga glioblastoma copy number up	71	0.0427807	0.189885					turashvili breast normal ductal vs lobular up	62	0.0385016	0.178895
senese hdac3 targets up	468	0.001	0.191946					martinez rb1 and tp53 targets dn	563	0	0.179153
martinez response to trabectedin up	69	0.0337197	0.192486					karlsson tgfb1 targets up	118	0.0211055	0.179037
wood ebv ebna1 targets up	108	0.0225873	0.192425					iwanaga carcinogenesis by kras dn	116	0.0182741	0.179043
reactome phase i functionalization of compounds	103	0.0339157	0.193336					lu aging brain up	257	0.009	0.178882
hoshida liver cancer survival up	73	0.0375783	0.193485					purbey targets of ctbp1 and satb1 dn	162	0.00805639	0.179665
rutella response to csf2rb and il4 up	332	0.005	0.193664					kim mycn amplification targets up	91	0.0272727	0.179538
fontaine follicular thyroid adenoma up	74	0.0317125	0.193581					ouellet cultured ovarian cancer invasive vs lmp up	69	0.0402062	0.17968
weston vegfa targets 6hr	52	0.0431035	0.193769					reactome hedgehog on state	86	0.0225873	0.179913
landis breast cancer progression dn	71	0.0386625	0.193771					wang smarce1 targets up	284	0.001	0.179946
gotzmann epithelial to mesenchymal transition dn	195	0.0141129	0.193717					sweet lung cancer kras up	447	0	0.179819
hoshida liver cancer subclass s1	230	0.00704935	0.194365					pasqualucci lymphoma by gc stage dn	165	0.00907258	0.179759
mori mature b lymphocyte up	84	0.030303	0.194697					kegg small cell lung cancer	84	0.0358974	0.179833
onder cdh1 targets 1 dn	165	0.00708502	0.194631					reactome autophagy	109	0.0263959	0.179754
pid myc repress pathway	63	0.0494737	0.194588					pid ps1 pathway	45	0.0482986	0.179685
takao response to uvb radiation dn	98	0.0279793	0.194596					reactome beta catenin independent wnt signaling	143	0.0120846	0.179678
turashvili breast ductal carcinoma vs lobular normal up	71	0.0356394	0.194451					yamashita liver cancer with epcam up	52	0.0446985	0.179586
alfano myc targets	232	0.00802407	0.194802					reactome regulation of pten gene transcription	60	0.0409234	0.180564
lindstedt dendritic cell maturation d	62	0.0374732	0.194648					reactome glucose metabolism	92	0.0327869	0.180674
zhu cmv 24 hr up	82	0.0334378	0.194873					chng multiple myeloma hyperploid up	53	0.0454545	0.180939
meissner npc hcp with h3k4me2 and h3k27me3	339	0.004004	0.194756					reactome the role of gtse1 in g2 m progression after g2 checkpoint	78	0.0352332	0.181018
zwang down by 2nd egf pulse	241	0.00501002	0.194574					winter hypoxia dn	48	0.0446809	0.180882
reactome costimulation by the cd28 family	66	0.0360934	0.194928					kim all disorders duration corr dn	141	0.0141414	0.180752
reactome regulation of actin dynamics for phagocytic cup formation	61	0.0407725	0.194938					eppert progenitor	134	0.0141988	0.18167
acevedo normal tissue adjacent to liver tumor dn	342	0.003003	0.194846					qi hypoxia	125	0.0141988	0.181777
lee recent thymic emigrant	221	0.00904523	0.194913					ueda central clock	85	0.031665	0.181637
reactome dna replication pre initiation	85	0.042487	0.194798					pasqualucci lymphoma by gc stage up	276	0.003003	0.181571
nadler hyperglycemia at obesity	57	0.0453564	0.194649					gal leukemic stem cell up	123	0.0211907	0.181475
andersen cholangiocarcinoma class1	62	0.0488842	0.195309					reactome cytosolic sensors of pathogen associated dna	62	0.0426639	0.18184
amit egf response 60 hela	43	0.0478842	0.195465					reactome degradation of beta catenin by the destruction complex	83	0.0206398	0.181766
puiffe invasion inhibited by ascites up	74	0.0376176	0.195384					yao temporal response to progesterone cluster 7	70	0.0309917	0.183551
kegg insulin signaling pathway	137	0.0233266	0.195697					kegg apoptosis	87	0.0328205	0.183325
reactome platelet activation signaling and aggregation	259	0.00702106	0.196336					reactome c type lectin receptors clrs	140	0.0151057	0.183492
gazda diamond blackfan anemia erythroid dn	438	0	0.196505					dang regulated by myc dn	245	0.005005	0.183463
basaki ybx1 targets up	280	0.00701403	0.196506					watanabe rectal cancer radiotherapy responsive up	110	0.0234694	0.183923
boylan multiple myeloma c d dn	261	0.00901804	0.196518					kokkinakis methionine deprivation 48hr up	130	0.0201816	0.184085
coates macrophage m1 vs m2 up	81	0.0418848	0.196663					riz erythroid differentiation ccne1	43	0.042735	0.184142
takeda targets of nup98 hoxa9 fusion 8d up	150	0.0201207	0.19676					reactome mitochondrial protein import	62	0.0382231	0.184037
rizki tumor invasiveness 2d up	68	0.0358272	0.196905					ivanova hematopoiesis mature cell	280	0.003003	0.184784
natsume response to interferon beta up	70	0.0349947	0.197835					huang gata2 targets up	146	0.0141271	0.184656
rhein all glucocorticoid therapy dn	360	0.004	0.19798					kegg gap junction	87	0.0235897	0.185681
kegg adherens junction	73	0.032666	0.198333					reactome g2 m checkpoints	167	0.0151057	0.186457
furukawa dusp6 targets pci35 dn	69	0.0421053	0.198269					bruins uvc response early late	293	0.004004	0.186616
pid cdc42 pathway	69	0.0455991	0.198561					reactome transcriptional regulation by runx2	119	0.0292929	0.187061
reactome cell death signalling via nrage nrif and nade	76	0.0366109	0.199213					zwang egf interval up	87	0.0450358	0.186871
yagi aml with 11q23 rearranged	331	0.003	0.19937					reactome signaling by notch1 in cancer	58	0.0464135	0.187407
dutertre estradiol response 6hr up	224	0.011022	0.199715					elvidge hif1a and hif2a targets dn	104	0.0306122	0.187277
samols targets of khsv mirnas dn	57	0.0376344	0.200502					pid endothelin pathway	63	0.0333681	0.188001
kegg pathways in cancer	325	0.00600601	0.200637					liu vmyb targets up	121	0.0273834	0.187897
blalock alzheimers disease incipient dn	164	0.0222898	0.200792					kim wt1 targets 8hr dn	120	0.0283114	0.187794
lin silenced by tumor microenvironment	103	0.0320579	0.201125					rutella response to csf2rb and il4 dn	315	0.005005	0.187876
vantveer breast cancer esr1 up	205	0.0120482	0.201202					kyng dna damage by 4nqo or uv	58	0.0397074	0.187964
chen hoxa5 targets 9hr up	215	0.0040282	0.201922					markey rb1 acute lof up	228	0.007	0.188592
farmer breast cancer apocrine vs basal	321	0.004	0.202073					zhou inflammatory response live dn	354	0	0.188548
whitfield cell cycle g2	162	0.0181635	0.202224					reactome signaling by tgf beta receptor complex	73	0.0442387	0.188427
brideau imprinted genes	62	0.0455959	0.202436					charafe breast cancer luminal vs mesenchymal dn	452	0.001	0.188692
reactome tp53 regulates metabolic genes	84	0.0247934	0.202349					enk uv response keratinocyte up	527	0	0.188723
hooi st7 targets up	88	0.0470219	0.202179					brown myeloid cell development dn	119	0.01417	0.18885
astier integrin signaling	53	0.0483871	0.202749					reactome regulation of runx2 expression and activity	73	0.0383023	0.188852
martinez tp53 targets up	588	0	0.20278					chandran metastasis dn	304	0.005	0.190281
fortschegger phf8 targets up	259	0.00601202	0.202668					rashi response to ionizing radiation 5	129	0.0271903	0.190163
krieg kdm3a targets not hypoxia	191	0.0150905	0.202541					reactome rho gtpase cycle	138	0.0110887	0.190078
bystrykh hematopoiesis stem cell and brain qtl trans	155	0.0212336	0.202459					dairkee cancer prone response bpa e2	117	0.0212551	0.19052
pece mammary stem cell dn	133	0.0235415	0.202369					reactome phospholipid metabolism	205	0.00900901	0.191149
reactome chromatin organization	270	0.00601202	0.202371					reactome antiviral mechanism by ifn stimulated genes	81	0.0464396	0.191924
boquest stem cell dn	214	0.00905433	0.203479					nikolsky breast cancer 17q21 q25 amplicon	317	0.003	0.191919
burton adipogenesis 3	100	0.0402062	0.204118					bhat esr1 targets not via akt1 dn	85	0.0275792	0.191923
ferrando t all with mll enl fusion up	86	0.0484037	0.20388					bae brca1 targets up	71	0.0409836	0.191803
kyng werner syndrom and normal aging up	79	0.0481675	0.203734					lei myb targets	316	0.006	0.19183
reactome cellular response to heat stress	101	0.0318275	0.203716					tonks targets of runx1 runx1t1 fusion monocyte up	201	0.01001	0.192017
whitfield cell cycle s	146	0.0263692	0.204005					ivanova hematopoiesis stem cell and progenitor	539	0.001	0.192659
smirnov response to ir 6hr dn	112	0.0286006	0.204158					han satb1 targets dn	376	0	0.193433
martinez rb1 targets dn	520	0.002002	0.204436					rutella response to hgf vs csf2rb and il4 up	406	0	0.193211
rickman tumor differentiated well vs poorly up	234	0.00707786	0.205175					flechner biopsy kidney transplant rejected vs ok dn	544	0	0.193413
duan prdm5 targets	75	0.0366109	0.205058					lui thyroid cancer cluster 2	43	0.0459893	0.193757
pid mtor 4pathway	69	0.0477707	0.205279					browne hcmv infection 24hr dn	139	0.0211055	0.19416
chicas rb1 targets senescent	543	0	0.205676					browne hcmv infection 14hr dn	280	0.003	0.19463
rickman tumor differentiated well vs moderately up	103	0.0331606	0.206016					kegg leishmania infection	69	0.0400411	0.196313
cui tcf21 targets 2 up	405	0.003003	0.205763					yagi aml with 11q23 rearranged	331	0.003	0.196296
jackson dnmt1 targets up	78	0.0399579	0.206105					martens bound by pml rara fusion	429	0.002	0.196234
pid rb 1pathway	65	0.0469729	0.206225					mori mature b lymphocyte up	84	0.0396341	0.196097
mcbryan pubertal breast 4 5wk dn	186	0.0170683	0.206549					martinez tp53 targets dn	565	0	0.19617
hoshida liver cancer late recurrence up	62	0.0416222	0.206451					senese hdac1 targets up	429	0.002	0.196004
pid erbb1 downstream pathway	105	0.0347293	0.206468					graham cml dividing vs normal quiescent up	182	0.0150754	0.196447
reactome pcp ce pathway	92	0.0321244	0.207354					chesler brain qtl cis	68	0.0427083	0.196906
purbey targets of ctbp1 and satb1 dn	162	0.0182927	0.207302					rutella response to hgf dn	231	0.005005	0.196777
kyng dna damage by gamma and uv radiation	79	0.043659	0.207328					blalock alzheimers disease incipient dn	164	0.0150301	0.196614
reactome fceri mediated nf kb activation	81	0.0494217	0.207534					brocke apoptosis reversed by il6	143	0.0240964	0.196737
kim myc amplification targets up	193	0.0252525	0.207706					takao response to uvb radiation dn	98	0.0323887	0.196503
reactome cell cell junction organization	65	0.0483193	0.207901					flechner pbl kidney transplant rejected vs ok up	63	0.0496381	0.19638
tien intestine probiotics 6hr dn	167	0.030303	0.20789					bystrykh hematopoiesis stem cell qtl cis	124	0.0191726	0.196478
garcia targets of fli1 and dax1 dn	161	0.0312185	0.207602					perez tp53 targets	1116	0	0.197869
flechner biopsy kidney transplant rejected vs ok dn	544	0.001	0.207631					reactome cellular response to heat stress	101	0.040568	0.19994
pyeon hpv positive tumors up	89	0.0446058	0.207496					reactome pcp ce pathway	92	0.0255885	0.199813
chiaradonna neoplastic transformation cdc25 dn	141	0.0262626	0.207934					reactome macroautophagy	90	0.0376782	0.199933
kegg wnt signaling pathway	150	0.0213632	0.207957					miyagawa targets of ewsr1 ets fusions up	258	0.011011	0.199941
reactome cell cycle checkpoints	289	0.00700701	0.207956					chung blister cytotoxicity up	134	0.0251762	0.199968
mullighan mll signature 2 dn	271	0.011022	0.207873					fulcher inflammatory response lectin vs lps dn	434	0	0.200421
kegg fc gamma r mediated phagocytosis	95	0.0431211	0.207983					ross aml with aml1 eto fusion	77	0.0442842	0.200692
burton adipogenesis 5	111	0.0400411	0.208647					kegg fc gamma r mediated phagocytosis	95	0.0348004	0.200658
kokkinakis methionine deprivation 96hr dn	72	0.0474183	0.208561					browne hcmv infection 24hr up	141	0.0271903	0.200537
gaussmann mll af4 fusion targets a up	188	0.0120968	0.209065					heller hdac targets silenced by methylation dn	272	0.006	0.200644
wang tumor invasiveness dn	203	0.0190955	0.209267					reactome cell death signalling via nrage nrif and nade	76	0.0466321	0.201714
heller hdac targets dn	289	0.00601202	0.209153					reactome fceri mediated nf kb activation	81	0.0460123	0.201663
amit serum response 60 mcf10a	56	0.0498375	0.209161					kegg pathways in cancer	325	0.005	0.201686
schuetz breast cancer ductal invasive up	339	0.00400802	0.20901					reactome death receptor signalling	141	0.0242424	0.202853
reactome degradation of beta catenin by the destruction complex	83	0.0407098	0.209279					mikkelsen mef icp with h3k27me3	192	0.0140281	0.202747
turashvili breast lobular carcinoma vs lobular normal up	93	0.0421377	0.209431					reactome dna replication pre initiation	85	0.0451282	0.202648
durchdewald skin carcinogenesis dn	253	0.00401606	0.209469					reactome adaptive immune system	740	0.001	0.202623
thum systolic heart failure dn	182	0.0151362	0.209823					martinez rb1 targets up	654	0	0.202503
takeda targets of nup98 hoxa9 fusion 16d up	170	0.0181635	0.209752					igarashi atf4 targets dn	96	0.034588	0.202523
qi hypoxia	125	0.0316973	0.210132					pangas tumor suppression by smad1 and smad5 dn	142	0.0281974	0.202499
gruetzmann pancreatic cancer dn	190	0.0161128	0.210219					bertucci medullary vs ductal breast cancer dn	170	0.0130391	0.202695
jison sickle cell disease dn	176	0.0210632	0.210268					west adrenocortical tumor dn	527	0	0.202431
manalo hypoxia dn	288	0.00701403	0.210158					kim wt1 targets 12hr up	163	0.0150905	0.202748
raghavachari platelet specific genes	71	0.0473684	0.211211					rutella response to hgf vs csf2rb and il4 dn	241	0.00901804	0.202779
reactome formation of the cornified envelope	128	0.0263425	0.211304					reactome uch proteinases	102	0.0316327	0.203554
reactome neutrophil degranulation	475	0	0.211195					zheng foxp3 targets in thymus up	190	0.012	0.204507
delys thyroid cancer up	440	0.003	0.211685					servitja islet hnf1a targets dn	103	0.0302419	0.206121
brocke apoptosis reversed by il6	143	0.0223124	0.211886					alcalay aml by npm1 localization up	137	0.020202	0.20708
huttmann b cll poor survival up	264	0.00804829	0.212279					zhang targets of ewsr1 fli1 fusion	87	0.0450358	0.207166
gal leukemic stem cell up	123	0.0347648	0.21296					dutertre estradiol response 6hr dn	90	0.0334686	0.207093
amit egf response 480 hela	158	0.0283401	0.215414					der ifn gamma response up	71	0.0476684	0.207453
gozgit esr1 targets dn	718	0	0.215238					chicas rb1 targets senescent	543	0	0.2076
kim wt1 targets up	215	0.0221774	0.215316					zwang egf interval dn	197	0.0160481	0.207523
zhou inflammatory response live dn	354	0.003003	0.215892					bhati g2m arrest by 2methoxyestradiol dn	125	0.0392749	0.207503
alcala apoptosis	84	0.0466321	0.21668					kegg alzheimers disease	151	0.0150602	0.208136
mikkelsen ips lcp with h3k4me3	165	0.0172065	0.216699					lindgren bladder cancer cluster 2a dn	138	0.0263158	0.20859
heller silenced by methylation up	276	0.00800801	0.216623					reactome metabolism of lipids	728	0	0.208482
delacroix rar bound es	445	0	0.216467					bystrykh hematopoiesis stem cell qtl trans	751	0	0.208925
mueller plurinet	299	0.00702106	0.21645					reactome neddylation	232	0.01001	0.208518
meissner npc hcp with h3k4me2	470	0.004	0.216226					winter hypoxia metagene	235	0.013013	0.209309
kang immortalized by tert dn	100	0.0435233	0.217369					bonome ovarian cancer survival optimal debulking	231	0.00700701	0.20921
kegg huntingtons disease	166	0.0325203	0.21777					reactome eph ephrin signaling	92	0.0482546	0.209976
liu sox4 targets up	133	0.0406091	0.219521					kegg chemokine signaling pathway	186	0.017	0.210209
bonome ovarian cancer survival optimal debulking	231	0.0160804	0.219273					gozgit esr1 targets dn	718	0	0.210904
sheth liver cancer vs txnip loss pam1	251	0.012024	0.219386					reactome g2 m dna damage checkpoint	94	0.0424242	0.211085
rattenbacher bound by celf1	390	0.002	0.218865					petrova endothelium lymphatic vs blood up	130	0.0303337	0.211979
senese hdac2 targets dn	118	0.0456389	0.218827					turashvili breast lobular carcinoma vs lobular normal up	93	0.0480573	0.212134
reactome trif ticam1 mediated tlr4 signaling	97	0.0384216	0.218718					diaz chronic meylogenous leukemia dn	113	0.0303644	0.211918
sarrio epithelial mesenchymal transition dn	150	0.0303337	0.219328					lein choroid plexus markers	102	0.0315682	0.212601
colina targets of 4ebp1 and 4ebp2	340	0.004	0.219474					gruetzmann pancreatic cancer up	341	0.003	0.212828
martens tretinoin response dn	770	0	0.220135					amit egf response 480 hela	158	0.0190763	0.214444
alonso metastasis up	190	0.0192503	0.220603					benporath myc targets with ebox	224	0.0170341	0.215232
mikkelsen mcv6 hcp with h3k27me3	422	0.005	0.221053					hollern emt breast tumor up	134	0.0382679	0.218136
piccaluga angioimmunoblastic lymphoma dn	130	0.037871	0.220844					koyama sema3b targets up	246	0.00700701	0.218144
reactome metabolism of vitamins and cofactors	187	0.0212121	0.222187					kegg tgf beta signaling pathway	85	0.0461066	0.218152
yagi aml with inv 16 translocation	399	0.006	0.222051					boquest stem cell dn	214	0.0150301	0.21832
graessmann apoptosis by serum deprivation dn	223	0.0160481	0.22233					andersen cholangiocarcinoma class2	175	0.0241206	0.218823
sana response to ifng dn	83	0.0395421	0.222717					liu sox4 targets up	133	0.0313448	0.218951
reactome signaling by rho gtpases	448	0.003	0.223163					gruetzmann pancreatic cancer dn	190	0.0251509	0.218865
deurig t cell prolymphocytic leukemia up	350	0.007	0.22535					schaeffer prostate development 6hr up	149	0.0291457	0.218841
bochkis foxa2 targets	405	0.00800801	0.225445					mcbryan pubertal breast 4 5wk dn	186	0.0211055	0.219921
hollern emt breast tumor up	134	0.036999	0.226073					bertucci medullary vs ductal breast cancer up	196	0.0170512	0.219823
kegg melanogenesis	101	0.0495356	0.226836					kayo calorie restriction muscle dn	83	0.0484037	0.219879
ivanova hematopoiesis stem cell	180	0.0241935	0.22679					reactome post translational protein modification	1418	0	0.220608
reactome post translational protein modification	1418	0	0.226674					charafe breast cancer basal vs mesenchymal up	117	0.0362173	0.220582
zhan multiple myeloma cd1 and cd2 up	89	0.0483042	0.226905					reactome tcr signaling	114	0.0356053	0.220655
hinata nfkb targets keratinocyte up	84	0.0415335	0.227749					mikkelsen mef hcp with h3k27me3	574	0.001	0.220623
pilon klf1 targets up	471	0.002	0.227639					kegg insulin signaling pathway	137	0.0282828	0.220532
heller hdac targets silenced by methylation dn	272	0.0140281	0.228923					ginestier breast cancer 20q13 amplification up	101	0.0449898	0.22123
hollern squamous breast tumor	155	0.040568	0.229379					reactome transcriptional regulation by runx1	236	0.00802407	0.221318
bystrykh hematopoiesis stem cell qtl trans	751	0.001	0.229374					reactome homology directed repair	136	0.0342397	0.221282
reactome neddylation	232	0.0150451	0.229549					pilon klf1 targets up	471	0.003	0.221279
kegg neuroactive ligand receptor interaction	271	0.0140421	0.230119					elvidge hif1a targets dn	91	0.0489297	0.221187
bild e2f3 oncogenic signature	236	0.0190572	0.230099					dang myc targets up	128	0.0385396	0.221186
piccaluga angioimmunoblastic lymphoma up	199	0.0210843	0.229974					boudoukha bound by igf2bp2	96	0.0448522	0.222794
ivanova hematopoiesis mature cell	280	0.00900901	0.231475					tonks targets of runx1 runx1t1 fusion hsc dn	187	0.034	0.223082
martinez rb1 and tp53 targets up	587	0.004	0.23157					burton adipogenesis 9	79	0.0429009	0.223296
smid breast cancer relapse in bone dn	300	0.0110331	0.232618					hoshida liver cancer subclass s1	230	0.0150451	0.223646
aston major depressive disorder dn	156	0.0254065	0.23304					bystrykh hematopoiesis stem cell and brain qtl trans	155	0.0310933	0.223862
kegg axon guidance	129	0.0344828	0.233505					reactome signaling by notch	232	0.0160321	0.224245
ivanova hematopoiesis late progenitor	488	0.005	0.234141					chen hoxa5 targets 9hr up	215	0.012024	0.223929
mikkelsen es icp with h3k4me3 and h3k27me3	128	0.0355691	0.234584					wu cell migration	181	0.0301508	0.223989
chicas rb1 targets confluent	542	0.002	0.234857					nikolsky breast cancer 11q12 q14 amplicon	155	0.038191	0.224266
goldrath antigen response	342	0.00700701	0.234928					wang smarce1 targets dn	370	0.005	0.224639
schlosser myc targets repressed by serum	157	0.0397554	0.235066					plasari tgfb1 targets 10hr dn	246	0.007	0.224832
kim mycn amplification targets dn	102	0.0453141	0.234922					bochkis foxa2 targets	405	0.002	0.225425
mcbryan pubertal breast 3 4wk up	200	0.0211055	0.235083					kegg oxidative phosphorylation	114	0.0445795	0.225375
ueda periferal clock	166	0.035533	0.235456					heller hdac targets dn	289	0.005	0.226245
watanabe rectal cancer radiotherapy responsive up	110	0.0387755	0.235517					sung metastasis stroma up	108	0.0446701	0.226417
lindgren bladder cancer cluster 2b	375	0.004	0.236081					izadpanah stem cell adipose vs bone up	125	0.0442211	0.226444
dairkee cancer prone response bpa e2	117	0.0462012	0.236598					nikolsky mutated and amplified in breast cancer	92	0.0451745	0.226557
yamazaki tceb3 targets dn	189	0.0341023	0.236856					reactome cell cell communication	128	0.0404858	0.227679
lu ezh2 targets dn	376	0.007	0.236659					deurig t cell prolymphocytic leukemia up	350	0.009	0.227941
browne hcmv infection 24hr up	141	0.0419223	0.236696					macaeva pbmc response to ir	97	0.0497968	0.228992
schaeffer prostate development 6hr up	149	0.0376016	0.236727					reactome signaling by receptor tyrosine kinases	468	0.004	0.229808
kokkinakis methionine deprivation 48hr up	130	0.0468909	0.237803					figueroa aml methylation cluster 7 up	110	0.0425963	0.230882
lim mammary stem cell up	460	0.002	0.237812					figueroa aml methylation cluster 3 up	160	0.0392749	0.231493
tonks targets of runx1 runx1t1 fusion monocyte up	201	0.041289	0.238357					sasaki adult t cell leukemia	161	0.0230924	0.231401
benporath myc targets with ebox	224	0.0221551	0.23846					lee differentiating t lymphocyte	182	0.0310621	0.232417
nikolsky breast cancer 17q21 q25 amplicon	317	0.012012	0.238434					goldrath antigen response	342	0.011	0.232665
davicioni targets of pax foxo1 fusions up	249	0.0221551	0.238141					rao bound by sall4 isoform b	490	0.001	0.233719
bhat esr1 targets via akt1 up	278	0.0210843	0.238901					reactome mitotic prophase	141	0.040404	0.233645
benporath proliferation	145	0.0374873	0.23958					onder cdh1 targets 1 up	134	0.0483871	0.236086
browne hcmv infection 48hr dn	466	0.002	0.24083					ivanova hematopoiesis stem cell long term	208	0.0291165	0.237708
lindgren bladder cancer cluster 1 dn	372	0.012	0.240698					chicas rb1 targets growing	240	0.0200401	0.238141
mikkelsen npc hcp with h3k27me3	337	0.01001	0.241248					acevedo normal tissue adjacent to liver tumor dn	342	0.014	0.238754
li induced t to natural killer dn	135	0.0437882	0.241707					chiaradonna neoplastic transformation cdc25 dn	141	0.0392354	0.238951
fujii ybx1 targets dn	190	0.0263158	0.243279					wei mir34a targets	142	0.0485339	0.239861
smirnov circulating endotheliocytes in cancer up	157	0.030581	0.24315					browne hcmv infection 6hr dn	158	0.0432161	0.240363
kauffmann dna replication genes	145	0.0467955	0.243306					zwang class 1 transiently induced by egf	484	0.004	0.240248
sansom apc targets dn	341	0.017	0.243418					gregory synthetic lethal with imatinib	141	0.040282	0.243593
wilcox response to progesterone up	148	0.0447609	0.245388					reactome deubiquitination	296	0.017	0.244164
chicas rb1 targets growing	240	0.029029	0.245501					kaab heart atrium vs ventricle dn	257	0.0160481	0.244067
wierenga stat5a targets dn	184	0.0394338	0.245473					browne hcmv infection 16hr up	219	0.0230692	0.245207
firestein proliferation	162	0.0416667	0.245999					turashvili breast ductal carcinoma vs ductal normal dn	182	0.0321285	0.245485
browne hcmv infection 16hr up	219	0.0251256	0.246294					kinsey targets of ewsr1 flii fusion dn	320	0.0130261	0.249067
reactome response to elevated platelet cytosolic ca2plus	132	0.0488798	0.247836					yagi aml with t 8 21 translocation	357	0.012012	0.24991
markey rb1 acute lof dn	226	0.02002	0.248281
rosty cervical cancer proliferation cluster	139	0.0364742	0.249397

## Sheet: webgestalt
Supplementary Table 3B. Webgestalt enrichment analysis of mRNA for White，Black and Asian PCa patients.
Asian VS Black								Asian VS White								Black VS White
Black				Asian				White				Asian				White				Black
Description	Overlap	PValue	UserId	Description	Overlap	PValue	UserId	Description	Overlap	PValue	UserId	Description	Overlap	PValue	UserId	Description	Overlap	PValue	UserId	Description	Overlap	PValue	UserId
Drug metabolism	3	0.0326046	UGT2B17;UGT1A8;UGT2B7	regulation of cation channel activity	6	0.00123084	OPRM1;GALR2;KCNRG;TRDN;SHISA8;STAC3	Metabolism of xenobiotics by cytochrome P450	5	0.00182563	UGT1A1;UGT2B17;UGT1A8;CYP1A1;UGT2B11	response to antibiotic	7	0.0300944	BIRC2;CRIP1;CA3;GOT2;GRIN3A;FOSL1;OPRK1	Drug metabolism	6	0.000331095	UGT1A1;CYP3A4;UGT1A10;UGT1A8;CYP2B6;UGT2B11	response to external biotic stimulus	20	3.30928e-05	SEMG2;SEMG1;FABP4;HTN3;GZMA;LBP;IRF4;AICDA;SLPI;ANKRD1;MS4A1;NOS2;IL6;S100A7;IGLL5;CA3;JCHAIN;FGA;S100A14;CXCL2
Metabolism of xenobiotics by cytochrome P450	3	0.0373829	UGT2B17;UGT1A8;UGT2B7	transmembrane signaling receptor activity	20	0.00124991	UNC5C;OR51G2;OPRM1;OR51B4;OR7G3;UNC5A;PTPRR;KIR3DL1;OXGR1;RXFP2;GALR2;OR7C2;OR10W1;GPR101;BRS3;OPRK1;HTR3B;BMPR2;OPN1MW3;OR1A1	Drug metabolism	4	0.00949857	UGT1A1;UGT2B17;UGT1A8;UGT2B11	response to drug	15	0.0479774	BIRC2;METTL21C;CA3;EPO;NEUROD1;SLC32A1;ANKRD1;GOT2;GRIN3A;ENO3;FOSL1;OPRK1;RYR1;LY6H;SLC17A8	Metabolism of xenobiotics by cytochrome P450	6	0.000443896	UGT1A1;CYP3A4;UGT1A10;UGT1A8;CYP2B6;UGT2B11	response to biotic stimulus	20	5.00732e-05	SEMG2;SEMG1;FABP4;HTN3;GZMA;LBP;IRF4;AICDA;SLPI;ANKRD1;MS4A1;NOS2;IL6;S100A7;IGLL5;CA3;JCHAIN;FGA;S100A14;CXCL2
Drug metabolism	3	0.0411886	UGT2B17;UGT1A8;UGT2B7	anterior/posterior axon guidance	2	0.00125006	UNC5C;UNC5A	Drug metabolism	4	0.0130406	UGT1A1;UGT2B17;UGT1A8;UGT2B11	sarcoplasmic reticulum calcium ion transport	6	5.68049e-07	TRDN;METTL21C;CASQ1;DHRS7C;SLN;RYR1	Drug metabolism	5	0.00354759	UGT1A1;CYP3A4;UGT1A10;UGT1A8;UGT2B11	RNA polymerase II sequence-specific DNA-binding transcription factor binding	2	0.000934506	ANKRD2;ANKRD1
calcium ion binding	17	0.000374011	PCDHA10;PCDHA6;ITLN1;PCDHA4;MMP13;PCDHGB5;CPS1;CAPN12;PVALB;PCDHA8;ANXA8;PCDHA11;AOC1;PROC;SYT4;SCUBE2;PCDHA12	integral component of postsynaptic membrane	5	0.00229608	PCDH17;DAGLA;OPRM1;LRRTM2;OPRK1	calcium ion binding	20	0.000136254	PCDHA10;PCDHA6;PCDHA4;PCDHGB5;PCDHA8;NECAB2;CPS1;PLA2G2A;PCDHA11;MMP13;ITLN1;PCDHA12;RAPGEF2;PRSS2;DLL3;PROC;REG4;HABP2;PCDHAC1;AOC1	release of sequestered calcium ion into cytosol by sarcoplasmic reticulum	5	5.71656e-06	TRDN;METTL21C;CASQ1;DHRS7C;RYR1	drug transport	7	0.0222285	AGT;ABCB5;SLC36A3;FOLR3;CHRNA3;GHSR;SLC17A6	anion transport	12	0.0026452	GABRG2;LCN1;FABP4;HBA1;SLC16A12;GABRA1;NOS2;SLC6A5;MFSD2A;CA3;SYT4;APOA2
ligand-gated anion channel activity	3	0.000768495	GABRA1;GABRG2;GLRA3	regulation of transmembrane transporter activity	7	0.00256937	FXYD4;OPRM1;GALR2;KCNRG;TRDN;SHISA8;STAC3	Erlotinib	3	0.000496469	UGT1A1;ORM1;CYP1A1	cation transmembrane transport	22	7.70952e-06	FXYD4;TRDN;METTL21C;KCNRG;KCNA7;HCN1;STAC3;ACTN2;EPO;GALR2;CASQ1;SHISA8;DHRS7C;ASIC5;COX6A2;SLN;GRIN3A;SCN4A;SLC30A8;OPRK1;RYR1;SLC34A3	response to drug	20	0.0327767	TDO2;DBH;UGT1A1;AGT;CYP3A4;ABCB5;DPEP1;SLC36A3;FOLR3;PRKCG;CYP2B6;CHRM2;OPRM1;CHRM3;KCNC2;TH;CHRNA3;GHSR;SLC17A6;SLC22A6	G protein-coupled receptor signaling pathway	20	0.00334152	OPRD1;GABRG2;KLK14;OR2T10;GNGT1;OR5M11;GRM3;OR14I1;CARTPT;GPRC6A;OR2T5;CCKBR;OR10G7;GABRA1;OR6K2;OR2T35;OR10H3;OR2AG1;ACKR1;CXCL2
adenylate cyclase-inhibiting G protein-coupled glutamate receptor signaling pathway	2	0.00189096	GRM3;GRM7	G protein-coupled receptor signaling pathway	20	0.00263131	OR51G2;DAGLA;OPRM1;OR51B4;OR7G3;OXGR1;RXFP2;GALR2;CCL16;OR7C2;BAIAP3;OR10W1;GPR101;APLN;BRS3;OPRK1;GALP;OPN1MW3;NPW;OR1A1	G protein-coupled receptor signaling pathway, coupled to cyclic nucleotide second messenger	9	0.00248519	RXFP1;OPRD1;AGT;GRM7;HTR1D;RAPGEF2;XCR1;GRM3;ADGRG7	ion transmembrane transport	25	3.70321e-05	FXYD4;TRDN;METTL21C;KCNRG;KCNA7;HCN1;STAC3;ACTN2;EPO;GALR2;CASQ1;SHISA8;DHRS7C;SLC32A1;ASIC5;COX6A2;HTR3B;SLN;GRIN3A;SCN4A;SLC30A8;OPRK1;RYR1;SLC34A3;SLC17A8	exogenous drug catabolic process	2	0.0350497	CYP3A4;CYP2B6	regulation of response to external stimulus	14	0.00360856	FABP4;IL22RA2;LBP;CARTPT;IL21;C2CD4B;NOS2;IL6;CD19;FOXA2;S100A7;FGA;NRXN1;S100A14
negative regulation of calcium ion import	2	0.00250527	SEMG1;SPINK1	sensory perception of chemical stimulus	10	0.00417684	OR51G2;LCN1;CST1;OR51B4;OR7G3;OR7C2;CST4;OR10W1;UGT2A1;OR1A1	adenylate cyclase-inhibiting G protein-coupled glutamate receptor signaling pathway	2	0.00265887	GRM7;GRM3	cation transport	25	4.35679e-05	FXYD4;TRDN;METTL21C;KCNRG;KCNA7;HCN1;STAC3;ACTN2;EPO;GALR2;CASQ1;SHISA8;DHRS7C;CAMK2A;SLC32A1;ASIC5;COX6A2;SLN;GRIN3A;SCN4A;SLC30A8;OPRK1;RYR1;SLC34A3;SLC17A8	detection of chemical stimulus	22	1.26607e-07	DRGX;CST1;CST4;OR4A5;OR5J2;CST2;TAS2R43;FFAR4;OR6K6;OR56B4;CA6;OR51G2;OR7G3;OR10W1;OR52H1;OR1J4;OR5C1;OR14A16;OR5K4;OR5T2;PDX1;OR9Q2	ion homeostasis	14	0.00382078	METTL21C;MT1A;SLC24A4;RHCG;PVALB;CCKBR;OTC;CALB2;ATP6V0A4;ATP6V0D2;KCNA5;CD19;S100A14;MT1M
GABA-gated chloride ion channel activity	2	0.00575699	GABRA1;GABRG2	G protein-coupled receptor activity	14	0.0044426	OR51G2;OPRM1;OR51B4;OR7G3;OXGR1;RXFP2;GALR2;OR7C2;OR10W1;GPR101;BRS3;OPRK1;OPN1MW3;OR1A1	negative regulation of calcium ion import	2	0.00351837	SPINK1;SEMG1	inorganic ion transmembrane transport	20	7.5463e-05	FXYD4;TRDN;METTL21C;KCNRG;KCNA7;HCN1;STAC3;ACTN2;GALR2;CASQ1;DHRS7C;ASIC5;COX6A2;SLN;GRIN3A;SCN4A;SLC30A8;OPRK1;RYR1;SLC34A3	sensory perception of chemical stimulus	22	2.28928e-07	CST1;CST4;OR4A5;OR5J2;CST2;TAS2R43;FFAR4;OBP2B;OR6K6;OR56B4;CA6;OR51G2;OR7G3;OR10W1;OR52H1;OR1J4;OR5C1;OR14A16;OR5K4;OBP2A;OR5T2;OR9Q2	GABA-gated chloride ion channel activity	2	0.00398415	GABRG2;GABRA1
extracellular ligand-gated ion channel activity	4	0.00602524	GABRA1;GABRG2;GABRP;GLRA3	G protein-coupled peptide receptor activity	5	0.00541382	OPRM1;RXFP2;GALR2;BRS3;OPRK1	postsynaptic membrane	10	0.00412063	OPRD1;GLRA3;GRM7;DLGAP1;LHFPL4;GRID2;GRM3;GABRA1;DLGAP3;KCNC2	regulation of transmembrane transporter activity	10	7.88054e-05	FXYD4;TRDN;KCNRG;STAC3;ACTN2;EPO;GALR2;CASQ1;SHISA8;SLN	G protein-coupled receptor signaling pathway	38	1.43167e-06	ADGRG7;RXFP1;RS1;AZU1;RAPGEF2;GLRA3;IAPP;AGT;OR4A5;ECEL1;OR5J2;GPHA2;GPR83;TAS2R43;VIP;FFAR4;GHRHR;OR6K6;UTS2B;OR56B4;OR51G2;PPY;GRP;CHRM2;OR7G3;OPRM1;CHRM3;OR10W1;OR52H1;OR1J4;OR5C1;OR14A16;OR5K4;OR5T2;GHSR;GRM7;NMBR;OR9Q2	cation homeostasis	13	0.00419579	METTL21C;MT1A;SLC24A4;RHCG;PVALB;CCKBR;CALB2;ATP6V0A4;ATP6V0D2;KCNA5;CD19;S100A14;MT1M
G protein-coupled receptor signaling pathway	22	0.00673717	OPRD1;OR2T10;CGA;KLK14;GABRA1;GRM3;GABRG2;CARTPT;GRM7;GLRA3;CXCL1;CNR2;HTR1D;NMU;XCR1;GPR87;OR5M11;OR14I1;OR7D2;CCL24;CXCR5;OR4K2	integral component of synaptic membrane	5	0.00736313	PCDH17;DAGLA;OPRM1;LRRTM2;OPRK1	response to xenobiotic stimulus	9	0.00546657	UGT1A1;CPS1;TDO2;SDK1;UGT1A8;CYP1A1;DPEP1;UGT2B11;AOC1	regulation of cation channel activity	8	9.21083e-05	TRDN;KCNRG;STAC3;ACTN2;EPO;GALR2;CASQ1;SHISA8	G protein-coupled receptor activity	26	1.67332e-05	ADGRG7;RXFP1;OR4A5;OR5J2;GPR83;TAS2R43;FFAR4;GHRHR;OR6K6;OR56B4;OR51G2;CHRM2;OR7G3;OPRM1;CHRM3;OR10W1;OR52H1;OR1J4;OR5C1;OR14A16;OR5K4;OR5T2;GHSR;GRM7;NMBR;OR9Q2	intrinsic component of presynaptic membrane	4	0.00463249	OPRD1;GRM3;SLC6A5;NRXN1
G protein-coupled glutamate receptor signaling pathway	2	0.00898626	GRM3;GRM7	intrinsic component of synaptic membrane	5	0.0099972	PCDH17;DAGLA;OPRM1;LRRTM2;OPRK1	Gefitinib	2	0.00675586	ORM1;CYP1A1	regulation of transporter activity	10	0.00011888	FXYD4;TRDN;KCNRG;STAC3;ACTN2;EPO;GALR2;CASQ1;SHISA8;SLN	response to xenobiotic stimulus	14	1.87656e-05	TDO2;DBH;UGT1A1;CYP3A4;UGT1A10;UGT1A8;DPEP1;PRKCG;CYP2B6;UGT2B11;OPRM1;TH;GHSR;CES3	G protein-coupled receptor activity	14	0.00531865	OPRD1;OR2T10;OR5M11;GRM3;OR14I1;GPRC6A;OR2T5;CCKBR;OR10G7;OR6K2;OR2T35;OR10H3;OR2AG1;ACKR1
synaptic transmission, GABAergic	3	0.00936525	GABRA1;GABRG2;CNR2	detection of chemical stimulus	9	0.0100599	OR51G2;CST1;OR51B4;OR7G3;OR7C2;CST4;OR10W1;UGT2A1;OR1A1	G protein-coupled glutamate receptor signaling pathway	2	0.012514	GRM7;GRM3	regulation of ion transport	17	0.000127612	FXYD4;TRDN;METTL21C;KCNRG;KCNA7;HCN1;STAC3;ACTN2;EPO;GALR2;CASQ1;SHISA8;DHRS7C;CAMK2A;SLN;SCN4A;OPRK1	G protein-coupled receptor signaling pathway, coupled to cyclic nucleotide second messenger	13	2.30494e-05	ADGRG7;RXFP1;RAPGEF2;IAPP;AGT;GPHA2;VIP;GHRHR;CHRM2;OPRM1;CHRM3;OR5T2;GRM7	synaptic transmission, GABAergic	3	0.00557526	GABRG2;NPAS4;GABRA1
adenylate cyclase-inhibiting G protein-coupled receptor signaling pathway	4	0.00970161	OPRD1;GRM3;GRM7;HTR1D	negative regulation of adenylate cyclase activity	2	0.0105796	OPRM1;GALR2	adenylate cyclase-modulating G protein-coupled receptor signaling pathway	7	0.0126323	RXFP1;OPRD1;GRM7;HTR1D;RAPGEF2;GRM3;ADGRG7	calmodulin-dependent protein kinase activity	4	0.00012949	MYLK2;MYLK3;CAMK2A;CAMK1D	detection of chemical stimulus involved in sensory perception of taste	6	2.30583e-05	CST1;CST4;CST2;TAS2R43;FFAR4;CA6	inhibitory extracellular ligand-gated ion channel activity	2	0.00709365	GABRG2;GABRA1
anion channel activity	4	0.0100941	GABRA1;GABRG2;GABRP;GLRA3	regulation of signaling receptor activity	10	0.0116636	FGF4;IL12A;FGF3;OPRM1;IFNA6;CCL16;APLN;LY6H;SHISA8;GALP	chemical synaptic transmission	15	0.0130172	SV2B;CDC20;AGT;GLRA3;GRM7;OMP;HTR1D;DLGAP1;RAPGEF2;NMU;GRID2;CACNA2D2;GRM3;CHAT;GABRA1	positive regulation of cation channel activity	5	0.000290823	TRDN;STAC3;ACTN2;GALR2;CASQ1	adenylate cyclase-modulating G protein-coupled receptor signaling pathway	11	0.000118312	ADGRG7;RXFP1;RAPGEF2;IAPP;GPHA2;VIP;GHRHR;CHRM2;OPRM1;CHRM3;GRM7	RNA polymerase II proximal promoter sequence-specific DNA binding	10	0.00762521	ETV4;MAFA;IRF4;POU2AF1;FOXI1;NPAS4;EN1;NEUROG3;FOSB;FOXA2
anion transport	12	0.0116224	TG;GABRA1;GABRG2;GABRP;SLC16A14;APOA2;GRM7;GLRA3;ABCC11;SYT4;SLC3A1;NOS2	positive regulation of cation channel activity	3	0.0127529	GALR2;TRDN;STAC3	cellular response to xenobiotic stimulus	6	0.0142947	UGT1A1;UGT1A8;CYP1A1;DPEP1;UGT2B11;AOC1	ion transport	29	0.000490127	LCN1;FXYD4;TRDN;METTL21C;KCNRG;KCNA7;HCN1;STAC3;CA3;ACTN2;EPO;GALR2;CASQ1;SHISA8;DHRS7C;CAMK2A;SLC32A1;ASIC5;COX6A2;HTR3B;GOT2;SLN;GRIN3A;SCN4A;SLC30A8;OPRK1;RYR1;SLC34A3;SLC17A8	detection of chemical stimulus involved in sensory perception of bitter taste	5	0.000137489	CST1;CST4;CST2;TAS2R43;CA6	calcium-dependent cysteine-type endopeptidase activity	2	0.00799752	CAPN12;CAPNS2
negative regulation of adenylate cyclase activity	2	0.015755	GRM3;GPR87	transcription by RNA polymerase I	3	0.0127529	UTP15;TBP;TAF1D	synaptic signaling	15	0.0152014	SV2B;CDC20;AGT;GLRA3;GRM7;OMP;HTR1D;DLGAP1;RAPGEF2;NMU;GRID2;CACNA2D2;GRM3;CHAT;GABRA1	negative regulation of cation transmembrane transport	5	0.000840842	TRDN;KCNRG;ACTN2;EPO;SLN	hormone activity	8	0.00013836	IAPP;AGT;GPHA2;VIP;UTS2B;CHGB;PPY;GRP	integral component of synaptic membrane	5	0.00800441	OPRD1;GRM3;GABRA1;SLC6A5;NRXN1
chemical synaptic transmission	13	0.0159248	GABRA1;GRM3;GABRG2;GABRP;CARTPT;GRM7;GLRA3;CNR2;HTR1D;SV2B;NMU;GFAP;SYT4	postsynaptic membrane	7	0.0134514	PCDH17;DAGLA;OPRM1;LRRTM2;SHISA8;OPRK1;HTR3B	voltage-gated calcium channel activity	3	0.0167555	CACNA2D2;CACNA1I;TMC1	cation channel complex	8	0.00111699	KCNA7;HCN1;STAC3;SHISA8;HTR3B;GRIN3A;SCN4A;RYR1	chemical synaptic transmission	21	0.000225808	DBH;RAPGEF2;SEZ6;GLRA3;AGT;NETO1;CACNG3;GRID2;CPLX2;PRKCG;CHRM2;OPRM1;CHRM3;GRIN2C;TH;OR5T2;CHRNA3;SCGN;GHSR;SLC17A6;GRM7	integral component of plasma membrane	22	0.0083394	OPRD1;GABRG2;CALHM3;HAS1;B3GNT3;SLC24A4;GRM3;RHCG;GPRC6A;SLC16A12;GABRA1;MS4A1;KCNA5;IL6;CD19;SLC6A5;MFSD2A;ICOS;NRXN1;CD69;OR10H3;ATP1B4
synaptic signaling	13	0.0182998	GABRA1;GRM3;GABRG2;GABRP;CARTPT;GRM7;GLRA3;CNR2;HTR1D;SV2B;NMU;GFAP;SYT4	positive regulation of synapse assembly	3	0.0150853	TPBG;LRRTM2;LRTM1	adenylate cyclase-inhibiting G protein-coupled receptor signaling pathway	4	0.0173292	OPRD1;GRM7;HTR1D;GRM3	RNA polymerase II sequence-specific DNA-binding transcription factor binding	2	0.00128558	ANKRD2;ANKRD1	Nilotinib	3	0.00023746	UGT1A1;CYP3A4;CYP2B6	cellular response to biotic stimulus	6	0.0089991	LBP;AICDA;ANKRD1;NOS2;IL6;CXCL2
chloride transport	4	0.0195794	GABRA1;GABRG2;GABRP;GLRA3	positive regulation of cation transmembrane transport	4	0.0207681	GALR2;TRDN;OPRK1;STAC3	ligand-gated anion channel activity	2	0.0197762	GLRA3;GABRA1	regulation of calcium ion transport	8	0.00148391	TRDN;METTL21C;STAC3;EPO;CASQ1;DHRS7C;CAMK2A;SLN	trans-synaptic signaling	21	0.000263935	DBH;RAPGEF2;SEZ6;GLRA3;AGT;NETO1;CACNG3;GRID2;CPLX2;PRKCG;CHRM2;OPRM1;CHRM3;GRIN2C;TH;OR5T2;CHRNA3;SCGN;GHSR;SLC17A6;GRM7	ligand-gated anion channel activity	2	0.00995113	GABRG2;GABRA1
RNA polymerase II core promoter sequence-specific DNA binding	2	0.0205861	POU2AF1;PAX6	integral component of presynaptic membrane	3	0.0211591	PCDH17;OPRM1;OPRK1	response to biotic stimulus	18	0.020846	PGLYRP4;UGT1A1;CPS1;SEMG2;PLA2G2A;SEMG1;ITLN1;HNRNPUL1;EME1;PRSS2;RNASE6;PGLYRP1;CYP1A1;GRP;IGLL5;REG4;GRPR;IL25	regulation of cytosolic calcium ion concentration	10	0.00151399	TRDN;METTL21C;FPR1;EPO;GALR2;CASQ1;DHRS7C;ACKR2;RYR1;WBP2NL	synaptic signaling	21	0.000290542	DBH;RAPGEF2;SEZ6;GLRA3;AGT;NETO1;CACNG3;GRID2;CPLX2;PRKCG;CHRM2;OPRM1;CHRM3;GRIN2C;TH;OR5T2;CHRNA3;SCGN;GHSR;SLC17A6;GRM7	intrinsic component of synaptic membrane	5	0.0108513	OPRD1;GRM3;GABRA1;SLC6A5;NRXN1
transmitter-gated ion channel activity	3	0.021238	GABRA1;GABRG2;GLRA3	negative regulation of calcium-mediated signaling	2	0.0215927	MYOZ2;TRDN	G protein-coupled receptor signaling pathway	23	0.0240511	ARHGEF3;RS1;RXFP1;CGA;NECAB2;OPRD1;AGT;GLRA3;GRM7;HTR1D;RAPGEF2;OR7D2;NMU;XCR1;GRP;GPR12;OR2T10;GRPR;GRM3;ECEL1;UTS2B;ADGRG7;GABRA1	transmembrane transport	26	0.00159994	FXYD4;TRDN;METTL21C;KCNRG;KCNA7;HCN1;STAC3;ACTN2;EPO;GALR2;CASQ1;SHISA8;DHRS7C;SLC32A1;ASIC5;COX6A2;HTR3B;GPC3;SLN;GRIN3A;SCN4A;SLC30A8;OPRK1;RYR1;SLC34A3;SLC17A8	excitatory postsynaptic potential	7	0.000294951	SEZ6;GLRA3;NETO1;GRID2;OPRM1;GRIN2C;CHRNA3	proton-transporting two-sector ATPase complex, proton-transporting domain	2	0.014419	ATP6V0A4;ATP6V0D2
transmitter-gated channel activity	3	0.021238	GABRA1;GABRG2;GLRA3	cellular potassium ion transport	5	0.0216113	FXYD4;GALR2;KCNRG;OPRK1;HCN1	phospholipase C-activating G protein-coupled receptor signaling pathway	4	0.0248314	OPRD1;AGT;GRP;GRPR	positive regulation of cation transmembrane transport	6	0.0016223	TRDN;STAC3;ACTN2;GALR2;CASQ1;OPRK1	adenylate cyclase-activating G protein-coupled receptor signaling pathway	8	0.000368678	ADGRG7;RXFP1;RAPGEF2;IAPP;GPHA2;VIP;GHRHR;OPRM1	proton-transporting ATPase activity, rotational mechanism	2	0.014419	ATP6V0A4;ATP6V0D2
synaptic membrane	9	0.0242724	OPRD1;LHFPL4;GABRA1;GRM3;GABRG2;GABRP;GRM7;GLRA3;DLGAP3	synaptic signaling	11	0.0216873	PCDH17;DAGLA;OPRM1;MYLK2;LRRTM2;CPLX2;BAIAP3;SHISA8;OPRK1;HTR3B;STAC3	adaptation of signaling pathway	2	0.0261213	RS1;NECAB2	regulation of calcium ion transmembrane transport	6	0.00188572	TRDN;METTL21C;STAC3;CASQ1;DHRS7C;SLN	cellular response to xenobiotic stimulus	9	0.000385791	UGT1A1;CYP3A4;UGT1A10;UGT1A8;DPEP1;CYP2B6;UGT2B11;OPRM1;CES3	cellular response to cytokine stimulus	15	0.0161241	OPRD1;FABP4;IL22RA2;LBP;IRF4;GPD1;IL21;TNFRSF17;ANKRD1;SPOCK2;NOS2;IL6;TCL1A;ACKR1;CXCL2
G protein-coupled chemoattractant receptor activity	2	0.0259506	XCR1;CXCR5	regulation of transmembrane transport	9	0.0217847	FXYD4;OPRM1;GALR2;KCNRG;TRDN;SHISA8;OPRK1;STAC3;HCN1	synaptic membrane	10	0.0273944	OPRD1;GLRA3;GRM7;DLGAP1;LHFPL4;GRID2;GRM3;GABRA1;DLGAP3;KCNC2	regulation of calcium ion transport into cytosol	5	0.00193831	TRDN;METTL21C;EPO;CASQ1;DHRS7C	chemical synaptic transmission, postsynaptic	7	0.000473642	SEZ6;GLRA3;NETO1;GRID2;OPRM1;GRIN2C;CHRNA3	chemical synaptic transmission	11	0.0219424	GABRG2;GRM3;CARTPT;NPAS4;CALB2;GABRA1;SLC6A5;GJD2;NRXN1;OR10H3;SYT4
G protein-coupled receptor signaling pathway, coupled to cyclic nucleotide second messenger	6	0.0348902	OPRD1;GRM3;GRM7;CNR2;HTR1D;XCR1	adenylate cyclase-activating G protein-coupled receptor signaling pathway	4	0.0218006	OPRM1;RXFP2;GALR2;GPR101	RNA polymerase II core promoter sequence-specific DNA binding	2	0.0283959	PAX6;POU2AF1	positive regulation of cytosolic calcium ion concentration	9	0.00222636	TRDN;METTL21C;FPR1;EPO;GALR2;CASQ1;DHRS7C;ACKR2;RYR1	cellular hormone metabolic process	7	0.000768186	UGT1A1;CYP3A4;UGT1A8;UGT2B11;DHRS2;CYP11B1;BMP5	GABA-ergic synapse	3	0.0223091	GABRG2;GABRA1;NRXN1
ATPase activity, coupled to movement of substances	4	0.0366609	ABCC12;ABCB7;ATP12A;ABCC11	termination of RNA polymerase I transcription	2	0.0244805	TBP;TAF1D	response to external biotic stimulus	17	0.0306292	PGLYRP4;UGT1A1;CPS1;SEMG2;PLA2G2A;SEMG1;ITLN1;HNRNPUL1;PRSS2;RNASE6;PGLYRP1;CYP1A1;GRP;IGLL5;REG4;GRPR;IL25	calcium ion transport into cytosol	6	0.00234007	TRDN;METTL21C;EPO;CASQ1;DHRS7C;RYR1	Olaparib	2	0.00161314	CYP3A4;CYP2B6	regulation of presynapse assembly	2	0.0224279	CBLN2;NRXN1
regulation of calcium ion import	2	0.0449087	SEMG1;SPINK1	regulation of potassium ion transmembrane transport	3	0.0250314	GALR2;KCNRG;OPRK1	transmitter-gated ion channel activity	3	0.0331117	GLRA3;GRID2;GABRA1	neurotransmitter loading into synaptic vesicle	2	0.0023702	SLC32A1;SLC17A8	G protein-coupled neurotransmitter receptor activity	4	0.00171018	CHRM2;OPRM1;CHRM3;OR5T2	regulation of presynapse organization	2	0.0239056	CBLN2;NRXN1
ligand-gated ion channel activity	4	0.0461045	GABRA1;GABRG2;GABRP;GLRA3	positive regulation of ion transmembrane transport	4	0.0274305	GALR2;TRDN;OPRK1;STAC3	transmitter-gated channel activity	3	0.0331117	GLRA3;GRID2;GABRA1	positive regulation of transporter activity	5	0.0027698	TRDN;STAC3;ACTN2;GALR2;CASQ1	regulation of postsynaptic membrane potential	7	0.00201909	SEZ6;GLRA3;NETO1;GRID2;OPRM1;GRIN2C;CHRNA3	ATP hydrolysis coupled proton transport	2	0.0239056	ATP6V0A4;ATP6V0D2
regulation of adenylate cyclase activity	2	0.0472551	GRM3;GPR87	intrinsic component of presynaptic membrane	3	0.0283854	PCDH17;OPRM1;OPRK1	regulation of steroid metabolic process	4	0.0392744	UGT1A1;CGA;AGT;UGT1A8	cellular calcium ion homeostasis	11	0.00299096	TRDN;METTL21C;FPR1;EPO;GALR2;CASQ1;DHRS7C;CSRP3;ACKR2;RYR1;WBP2NL	Porphyrin and chlorophyll metabolism	4	0.00205288	UGT1A1;UGT1A10;UGT1A8;UGT2B11	regulation of postsynaptic membrane potential	4	0.0244128	GABRG2;NPAS4;GABRA1;NRXN1
negative regulation of glucagon secretion	1	0.0474221	CARTPT	adenylate cyclase-inhibiting G protein-coupled receptor signaling pathway	3	0.0301476	OPRM1;RXFP2;OPRK1	integral component of postsynaptic membrane	4	0.0461482	OPRD1;GRID2;GRM3;GABRA1	ligand-gated cation channel activity	5	0.00327048	HCN1;ASIC5;HTR3B;GRIN3A;RYR1	Crizotinib	2	0.00239915	CYP3A4;CYP2B6	synaptic signaling	11	0.0247644	GABRG2;GRM3;CARTPT;NPAS4;CALB2;GABRA1;SLC6A5;GJD2;NRXN1;OR10H3;SYT4
extracellularly glycine-gated ion channel activity	1	0.0474221	GLRA3	positive regulation of calcium ion transmembrane transporter activity	2	0.0306953	TRDN;STAC3	pigment metabolic process	3	0.0467635	UGT1A1;RAPGEF2;UGT1A8	cytosolic calcium ion transport	6	0.00349058	TRDN;METTL21C;EPO;CASQ1;DHRS7C;RYR1	postsynaptic density membrane	5	0.00283173	NETO1;CACNG3;GRID2;CHRM3;GRIN2C	ATP hydrolysis coupled ion transmembrane transport	2	0.0269768	ATP6V0A4;ATP6V0D2
extracellularly glycine-gated chloride channel activity	1	0.0474221	GLRA3	transcription initiation from RNA polymerase I promoter	2	0.0306953	TBP;TAF1D	regulation of calcium ion transport	6	0.0493135	IL16;SPINK1;OPRD1;AGT;SEMG1;TMC1	integral component of synaptic vesicle membrane	3	0.00362083	SLC32A1;OPRK1;SLC17A8	modulation of chemical synaptic transmission	13	0.00301194	RAPGEF2;AGT;NETO1;CACNG3;GRID2;CPLX2;PRKCG;CHRM2;GRIN2C;CHRNA3;SCGN;GHSR;GRM7	ATP hydrolysis coupled transmembrane transport	2	0.0285689	ATP6V0A4;ATP6V0D2
G protein-coupled receptor activity	13	0.0495031	OPRD1;OR2T10;GRM3;GRM7;CNR2;HTR1D;XCR1;GPR87;OR5M11;OR14I1;OR7D2;CXCR5;OR4K2	regulation of adenylate cyclase activity	2	0.0323367	OPRM1;GALR2	humoral immune response	13	4.76282e-06	PGLYRP4;SEMG2;PLA2G2A;SEMG1;TFE3;ITLN1;CR2;PRSS2;KRT1;RNASE6;PGLYRP1;IGLL5;POU2AF1	transmembrane transporter complex	9	0.00363034	FXYD4;KCNA7;HCN1;STAC3;SHISA8;HTR3B;GRIN3A;SCN4A;RYR1	regulation of trans-synaptic signaling	13	0.0030741	RAPGEF2;AGT;NETO1;CACNG3;GRID2;CPLX2;PRKCG;CHRM2;GRIN2C;CHRNA3;SCGN;GHSR;GRM7	integral component of synaptic vesicle membrane	2	0.0285689	OPRD1;SYT4
regulation of serine-type endopeptidase activity	5	9.75945e-09	SEMG2;SEMG1;SPINK1;ANXA8;SPINK2	potassium ion transport	5	0.0345153	FXYD4;GALR2;KCNRG;OPRK1;HCN1	organic acid binding	11	3.5679e-05	UGT1A1;UGT2B17;CPS1;GLRA3;UCP1;GRM7;TDO2;TAT;UGT1A8;GLDC;HBQ1	divalent inorganic cation transport	11	0.00366717	TRDN;METTL21C;STAC3;EPO;CASQ1;DHRS7C;CAMK2A;SLN;GRIN3A;SLC30A8;RYR1	postsynaptic membrane	11	0.00310639	GLRA3;NETO1;CACNG3;GRID2;CHRM2;OPRM1;CHRM3;GRIN2C;KCNC2;CHRNA3;GRM7	ATPase activity, coupled to transmembrane movement of ions, rotational mechanism	2	0.0301978	ATP6V0A4;ATP6V0D2
regulation of serine-type peptidase activity	5	9.75945e-09	SEMG2;SEMG1;SPINK1;ANXA8;SPINK2	positive regulation of potassium ion transmembrane transport	2	0.0357204	GALR2;OPRK1	antimicrobial humoral response	8	4.01304e-05	PGLYRP4;SEMG2;PLA2G2A;SEMG1;ITLN1;PRSS2;RNASE6;PGLYRP1	calcium ion homeostasis	11	0.00379092	TRDN;METTL21C;FPR1;EPO;GALR2;CASQ1;DHRS7C;CSRP3;ACKR2;RYR1;WBP2NL	alkaloid metabolic process	2	0.0033303	CYP3A4;TH	RNA polymerase II regulatory region sequence-specific DNA binding	11	0.0325513	ETV4;MAFA;IRF4;DMRT2;POU2AF1;FOXI1;NPAS4;EN1;NEUROG3;FOSB;FOXA2
humoral immune response	14	1.02207e-07	SEMG2;SEMG1;POU2AF1;ITLN1;IGLL5;CR2;PGLYRP4;CD19;KRT1;CXCL1;FCER2;VTN;MS4A1;PGLYRP1	RNA polymerase II transcription repressor complex	1	0.0386053	LIN52	Picrotoxin	3	5.06662e-05	GLRA3;CYP1A1;GABRA1	release of sequestered calcium ion into cytosol	5	0.00383327	TRDN;METTL21C;CASQ1;DHRS7C;RYR1	adenylate cyclase-inhibiting G protein-coupled acetylcholine receptor signaling pathway	2	0.0033303	CHRM2;CHRM3	transferrin transport	2	0.0335632	ATP6V0A4;ATP6V0D2
blood microparticle	9	1.03943e-06	GC;ORM1;AHSG;KRT1;APOA2;PRSS1;HPR;VTN;FGG	regulation of potassium ion transport	3	0.038773	GALR2;KCNRG;OPRK1	cellular glucuronidation	4	5.74608e-05	UGT1A1;UGT2B17;UGT1A8;UGT2B11	negative regulation of transmembrane transport	5	0.00383327	TRDN;KCNRG;ACTN2;EPO;SLN	G protein-coupled acetylcholine receptor activity	2	0.0033303	CHRM2;CHRM3	RNA polymerase II regulatory region DNA binding	11	0.03424	ETV4;MAFA;IRF4;DMRT2;POU2AF1;FOXI1;NPAS4;EN1;NEUROG3;FOSB;FOXA2
inflammatory response	22	1.73796e-06	ORM1;CR2;AHSG;CD19;KRT1;APOA2;CXCL17;CXCL1;CNR2;TNFAIP8L2;SCGB1A1;HPR;VTN;KRT16;PLGRKT;XCR1;DUOXA1;PROC;PGLYRP1;IL22RA2;CCL24;NOS2	synapse assembly	4	0.0403248	PCDH17;TPBG;LRRTM2;LRTM1	amino acid binding	6	6.41835e-05	CPS1;GLRA3;GRM7;TDO2;TAT;GLDC	regulation of transport	28	0.00411998	MYLK2;FXYD4;PCDH17;TRDN;METTL21C;KCNRG;KCNA7;HCN1;STAC3;ACTN2;EPO;GALR2;CASQ1;SHISA8;NEUROD1;DHRS7C;CAMK2A;CAMK1D;ANKRD1;APLN;GPC3;MYOM1;SLN;GRIN3A;SCN4A;SLC30A8;OPRK1;TTN	Neratinib	2	0.0033303	CYP3A4;ABCB5	negative regulation of synaptic vesicle exocytosis	1	0.0393859	SYT4
regulation of inflammatory response	15	2.41458e-06	CR2;AHSG;CD19;KRT1;CXCL17;CNR2;TNFAIP8L2;SCGB1A1;VTN;DUOXA1;PROC;PGLYRP1;IL22RA2;CCL24;NOS2	negative regulation of cation channel activity	2	0.0410387	KCNRG;TRDN	carboxylic acid binding	10	0.000114648	UGT1A1;UGT2B17;CPS1;GLRA3;UCP1;GRM7;TDO2;TAT;UGT1A8;GLDC	negative regulation of sequestering of calcium ion	5	0.00413925	TRDN;METTL21C;CASQ1;DHRS7C;RYR1	excitatory synapse	4	0.00362259	NETO1;CACNG3;GRID2;SLC17A6	presynaptic membrane	4	0.0405594	OPRD1;GRM3;SLC6A5;NRXN1
Zinc	9	2.69614e-06	SEMG1;AHSG;KRT1;APOA2;SERPINA4;KRT5;HPR;VTN;KRT16	sodium channel activity	2	0.0410387	ASIC5;HCN1	regulation of serine-type endopeptidase activity	3	0.000119545	SPINK1;SEMG2;SEMG1	positive regulation of calcium ion transmembrane transporter activity	3	0.00428433	TRDN;STAC3;CASQ1	regulation of response to extracellular stimulus	3	0.0039461	PRKCG;OPRM1;GHSR	synapse assembly	4	0.0429182	CBLN2;NPAS4;SPOCK2;NRXN1
positive regulation of killing of cells of other organism	4	3.93794e-06	PGLYRP4;FCER2;PGLYRP1;NOS2	chemical synaptic transmission	10	0.043533	PCDH17;OPRM1;MYLK2;LRRTM2;CPLX2;BAIAP3;SHISA8;OPRK1;HTR3B;STAC3	regulation of serine-type peptidase activity	3	0.000119545	SPINK1;SEMG2;SEMG1	regulation of sequestering of calcium ion	5	0.0042986	TRDN;METTL21C;CASQ1;DHRS7C;RYR1	synaptic membrane	13	0.00398186	GLRA3;NETO1;CACNG3;GRID2;PRKCG;CHRM2;OPRM1;CHRM3;GRIN2C;KCNC2;CHRNA3;GHSR;GRM7	transmitter-gated ion channel activity involved in regulation of postsynaptic membrane potential	2	0.0444724	GABRG2;GABRA1
regulation of killing of cells of other organism	4	1.06152e-05	PGLYRP4;FCER2;PGLYRP1;NOS2	RNA polymerase III preinitiation complex assembly	1	0.0461469	TBP	homophilic cell adhesion via plasma membrane adhesion molecules	9	0.00014454	PCDHA10;PCDHA6;PCDHA4;PCDHGB5;PCDHA8;PCDHA11;SDK1;PCDHA12;PCDHAC1	negative regulation of protein complex disassembly	4	0.00449241	SPTA1;LMOD2;SLN;TRIM54	integral component of postsynaptic density membrane	4	0.00418806	NETO1;CACNG3;GRID2;CHRM3	calcium channel regulator activity	2	0.0464025	GRM3;NRXN1
Nalmefene	3	1.74018e-05	OPRD1;UGT1A8;UGT2B7	G protein-coupled receptor signaling pathway, coupled to cyclic nucleotide second messenger	5	0.0472819	OPRM1;RXFP2;GALR2;GPR101;OPRK1	uronic acid metabolic process	4	0.000150586	UGT1A1;UGT2B17;UGT1A8;UGT2B11	sequestering of calcium ion	5	0.00480289	TRDN;METTL21C;CASQ1;DHRS7C;RYR1	intrinsic component of postsynaptic membrane	6	0.00503352	NETO1;CACNG3;GRID2;CHRM2;OPRM1;CHRM3	negative regulation of synaptic vesicle transport	1	0.0470762	SYT4
regulation of response to external stimulus	21	1.86538e-05	FOXA2;CR2;AHSG;CD19;CARTPT;KRT1;CXCL17;SEMA3A;CNR2;TNFAIP8L2;SCGB1A1;VTN;FGG;DUOXA1;PROC;ZSWIM6;PGLYRP1;TMPRSS6;IL22RA2;CCL24;NOS2	regulation of synapse assembly	3	0.0485162	TPBG;LRRTM2;LRTM1	glucuronate metabolic process	4	0.000150586	UGT1A1;UGT2B17;UGT1A8;UGT2B11	calcium ion transport	10	0.00481753	TRDN;METTL21C;STAC3;EPO;CASQ1;DHRS7C;CAMK2A;SLN;GRIN3A;RYR1	ion channel complex	10	0.00571773	CACNA1I;GLRA3;CACNG3;TRPC5;GRID2;CATSPERD;GRIN2C;KCNV1;KCNC2;CHRNA3	negative regulation of vesicle fusion	1	0.0470762	SYT4
negative regulation of serine-type endopeptidase activity	3	3.02363e-05	SPINK1;ANXA8;SPINK2	positive regulation of potassium ion transport	2	0.0485579	GALR2;OPRK1	neuropeptide signaling pathway	7	0.000165734	OPRD1;GLRA3;RAPGEF2;NMU;GRP;GRPR;ECEL1	regulation of release of sequestered calcium ion into cytosol	4	0.00520577	TRDN;METTL21C;CASQ1;DHRS7C	steroid metabolic process	10	0.0066885	UGT1A1;AGT;CYP3A4;UGT1A8;IDI2;CYP2B6;UGT2B11;DHRS2;CYP11B1;BMP5	defense response to bacterium	13	6.00933e-08	SEMG2;SEMG1;HTN3;LBP;AICDA;SLPI;NOS2;IL6;S100A7;IGLL5;JCHAIN;FGA;S100A14
negative regulation of serine-type peptidase activity	3	3.02363e-05	SPINK1;ANXA8;SPINK2	cysteine-type endopeptidase inhibitor activity	5	8.3521e-05	BIRC2;LCN1;CST1;CST4;BIRC5	xenobiotic glucuronidation	3	0.000230858	UGT1A1;UGT1A8;UGT2B11	positive regulation of potassium ion transmembrane transport	3	0.00540978	ACTN2;GALR2;OPRK1	hormone metabolic process	8	0.00747101	UGT1A1;CYP3A4;UGT1A8;GHRHR;UGT2B11;DHRS2;CYP11B1;BMP5	humoral immune response	13	7.67238e-08	SEMG2;SEMG1;HTN3;SLPI;POU2AF1;MS4A1;IL6;CD19;S100A7;IGLL5;JCHAIN;FGA;CXCL2
cellular response to histamine	3	4.80337e-05	GABRA1;GABRG2;AOC1	feeding behavior	6	0.000152251	OPRM1;GALR2;APLN;BRS3;OPRK1;NPW	Ascorbate and aldarate metabolism	4	0.000242082	UGT1A1;UGT2B17;UGT1A8;UGT2B11	potassium ion transport	7	0.00601553	FXYD4;KCNRG;KCNA7;HCN1;ACTN2;GALR2;OPRK1	regulation of synaptic plasticity	7	0.00747659	RAPGEF2;AGT;NETO1;GRID2;CPLX2;GRIN2C;SCGN	response to bacterium	19	2.93925e-07	SEMG2;SEMG1;FABP4;HTN3;GZMA;LBP;AICDA;SLPI;ANKRD1;MS4A1;NOS2;IL6;S100A7;IGLL5;CA3;JCHAIN;FGA;S100A14;CXCL2
negative regulation of response to external stimulus	12	5.37339e-05	CARTPT;KRT1;CXCL17;SEMA3A;CNR2;TNFAIP8L2;VTN;FGG;PROC;PGLYRP1;TMPRSS6;IL22RA2	sensory perception	18	0.000275492	OR51G2;LCN1;CRYGD;CST1;OPRM1;OR51B4;OR7G3;LRIT3;OR7C2;COL2A1;CST4;OR10W1;LOXHD1;BIRC5;UGT2A1;OPRK1;OPN1MW3;OR1A1	cell-cell adhesion via plasma-membrane adhesion molecules	11	0.000303065	PCDHA10;PCDHA6;PCDHA4;PCDHGB5;PCDHA8;PCDHA11;SDK1;PCDHA12;GRID2;CLDN2;PCDHAC1	calcium ion transmembrane transport	8	0.00649303	TRDN;METTL21C;STAC3;CASQ1;DHRS7C;SLN;GRIN3A;RYR1	transmitter-gated ion channel activity	4	0.0079151	GLRA3;GRID2;GRIN2C;CHRNA3	antimicrobial humoral response	8	2.86794e-06	SEMG2;SEMG1;HTN3;SLPI;S100A7;JCHAIN;FGA;CXCL2
integral component of plasma membrane	32	5.79805e-05	OPRD1;PCDHA10;PCDHA6;RHCG;PCDHA4;GABRA1;GRM3;PCDHGB5;GABRG2;CALHM3;GABRP;CD19;PCDHA8;SLC16A14;SEMA3A;PCDHA11;GRM7;RHBG;GLRA3;KCNK5;CNR2;FCER2;HTR1D;PLGRKT;XCR1;MS4A1;ATP12A;TMPRSS11A;ABCC11;SLC3A1;PCDHA12;CXCR5	Naltrexone	2	0.00060144	OPRM1;OPRK1	Neuroactive ligand-receptor interaction	11	0.000376576	RXFP1;CGA;OPRD1;GLRA3;GRM7;HTR1D;PRSS2;GRID2;GRPR;GRM3;GABRA1	negative regulation of cation channel activity	3	0.00669704	TRDN;KCNRG;EPO	transmitter-gated channel activity	4	0.0079151	GLRA3;GRID2;GRIN2C;CHRNA3	Zinc	8	5.84902e-06	SEMG1;MT1A;HBA1;HPR;S100A7;JCHAIN;FGA;APOA2
intrinsic component of plasma membrane	33	5.99662e-05	OPRD1;PCDHA10;PCDHA6;RHCG;PCDHA4;GABRA1;GRM3;PCDHGB5;GABRG2;CALHM3;GABRP;CD19;PCDHA8;SLC16A14;SEMA3A;PCDHA11;GRM7;RHBG;GLRA3;KCNK5;CNR2;FCER2;HTR1D;PLGRKT;XCR1;MS4A1;PRSS50;ATP12A;TMPRSS11A;ABCC11;SLC3A1;PCDHA12;CXCR5	Dihydromorphine	2	0.00060144	OPRM1;OPRK1	Medical Cannabis	5	0.000417594	OPRD1;GLRA3;CYP1A1;GPR12;CACNA1I	sodium channel activity	3	0.00669704	HCN1;ASIC5;SCN4A	phospholipase C-activating G protein-coupled receptor signaling pathway	5	0.00807237	AGT;GRP;CHRM2;OPRM1;NMBR	antibacterial humoral response	5	1.41946e-05	SEMG2;SEMG1;SLPI;JCHAIN;FGA
Neuroactive ligand-receptor interaction	11	8.31639e-05	OPRD1;CGA;GABRA1;GRM3;GABRG2;GABRP;GRM7;PRSS1;GLRA3;CNR2;HTR1D	nervous system process	22	0.000820662	OR51G2;LCN1;CRYGD;CST1;OPRM1;OR51B4;OR7G3;GALR2;LRIT3;OR7C2;KLK8;COL2A1;CST4;OR10W1;LOXHD1;BIRC5;UGT2A1;OPRK1;HTR3B;OPN1MW3;CBR3;OR1A1	Nabiximols	5	0.000417594	OPRD1;GLRA3;CYP1A1;GPR12;CACNA1I	calcium ion transmembrane import into cytosol	5	0.00678712	TRDN;METTL21C;CASQ1;DHRS7C;RYR1	G protein-coupled serotonin receptor signaling pathway	3	0.00867973	CHRM2;CHRM3;OR5T2	immunoglobulin complex	3	1.71763e-05	CD79A;IGLL5;JCHAIN
regulation of blood coagulation	6	9.37846e-05	FOXA2;KRT1;VTN;FGG;PROC;TMPRSS6	neuropeptide binding	3	0.000847457	OPRM1;GALR2;OPRK1	Cannabidiol	5	0.000493374	OPRD1;GLRA3;CYP1A1;GPR12;CACNA1I	regulation of potassium ion transmembrane transport	4	0.006852	KCNRG;ACTN2;GALR2;OPRK1	G protein-coupled serotonin receptor activity	3	0.00867973	CHRM2;CHRM3;OR5T2	immunoglobulin receptor binding	3	2.73207e-05	TARM1;IGLL5;JCHAIN
regulation of hemostasis	6	0.000100903	FOXA2;KRT1;VTN;FGG;PROC;TMPRSS6	netrin receptor activity	2	0.000897516	UNC5C;UNC5A	Morphine	3	0.000496469	UGT1A1;OPRD1;UGT1A8	positive regulation of potassium ion transport	3	0.00867434	ACTN2;GALR2;OPRK1	anion transport	15	0.00912409	SLCO1B7;PLA2G2A;SLC6A15;GLRA3;AGT;ABCA12;SLC38A11;SLC36A3;FOLR3;CA6;ATP8A2;SLC17A6;SLC22A6;GRM7;SLC2A2	defense response to other organism	14	2.74257e-05	SEMG2;SEMG1;HTN3;LBP;IRF4;AICDA;SLPI;NOS2;IL6;S100A7;IGLL5;JCHAIN;FGA;S100A14
retinoic acid binding	4	0.000106985	UGT2B17;UGT1A8;CRABP2;UGT2B7	Etorphine	2	0.000897516	OPRM1;OPRK1	glucuronosyltransferase activity	4	0.000534816	UGT1A1;UGT2B17;UGT1A8;UGT2B11	intrinsic component of synaptic vesicle membrane	3	0.00921641	SLC32A1;OPRK1;SLC17A8	calcium channel complex	4	0.00935349	CACNA1I;CACNG3;TRPC5;CATSPERD	response to other organism	20	3.20697e-05	SEMG2;SEMG1;FABP4;HTN3;GZMA;LBP;IRF4;AICDA;SLPI;ANKRD1;MS4A1;NOS2;IL6;S100A7;IGLL5;CA3;JCHAIN;FGA;S100A14;CXCL2
Oxazepam	4	0.000106985	GABRA1;GABRG2;GABRP;UGT2B7	Nalmefene	2	0.000897516	OPRM1;OPRK1	Pentose and glucuronate interconversions	4	0.000600709	UGT1A1;UGT2B17;UGT1A8;UGT2B11	negative regulation of calcium ion transport into cytosol	2	0.00966869	TRDN;EPO	Calcium signaling pathway	7	0.0097234	CALML5;CACNA1I;PRKCG;CHRM2;CHRM3;GRIN2C;PRKACG	regulation of serine-type endopeptidase activity	3	4.07404e-05	SEMG2;SEMG1;SPINK2
Taurine	4	0.000106985	GABRA1;GABRG2;GABRP;GLRA3	Eluxadoline	2	0.000897516	OPRM1;OPRK1	flavonoid metabolic process	3	0.000615342	UGT1A1;UGT1A8;CYP1A1	G protein-coupled receptor signaling pathway	21	0.00977104	DAGLA;OR51B4;FPR1;CCL16;ACTN2;GALR2;OR1A1;DEFB1;GPR25;GALP;GPR101;OXGR1;CAMK2A;APLN;OR6K2;OR3A3;ACKR2;OR7C2;OPRK1;NPW;OR10G7	voltage-gated cation channel activity	6	0.0103184	CACNA1I;CACNG3;OPRM1;GRIN2C;KCNV1;KCNC2	regulation of serine-type peptidase activity	3	4.07404e-05	SEMG2;SEMG1;SPINK2
regulation of coagulation	6	0.000116425	FOXA2;KRT1;VTN;FGG;PROC;TMPRSS6	positive regulation of protein processing	3	0.00107622	TNP2;NKD2;C6	Steroid hormone biosynthesis	5	0.000625867	UGT1A1;UGT2B17;UGT1A8;CYP1A1;UGT2B11	ligand-gated ion channel activity	5	0.0101429	HCN1;ASIC5;HTR3B;GRIN3A;RYR1	postsynaptic specialization membrane	5	0.0103416	NETO1;CACNG3;GRID2;CHRM3;GRIN2C	African trypanosomiasis	4	0.00017011	HBA1;HBA2;HPR;IL6
negative regulation of blood coagulation	5	0.000130954	KRT1;VTN;FGG;PROC;TMPRSS6	neuropeptide signaling pathway	5	0.00119933	OPRM1;GALR2;OPRK1;GALP;NPW	Propofol	4	0.00074943	UGT1A1;UGT1A8;CYP1A1;GABRA1	ligand-gated channel activity	5	0.0101429	HCN1;ASIC5;HTR3B;GRIN3A;RYR1	ion gated channel activity	10	0.0119062	CACNA1I;GLRA3;CACNG3;GRID2;ASIC5;OPRM1;GRIN2C;KCNV1;KCNC2;CHRNA3	nervous system process	24	0.00017605	OPRD1;GABRG2;LCN1;OR2T10;SLC24A4;RBP3;OR5M11;OR14I1;CARTPT;OR2T5;NPAS4;EN1;OR10G7;GABRA1;ATP6V0A4;NCAM2;OR6K2;OR2T35;GJD2;JAKMIP1;NRXN1;OR10H3;OR2AG1;SYT4
response to histamine	3	0.000138529	GABRA1;GABRG2;AOC1	negative regulation of vasoconstriction	2	0.00125006	APLN;BMPR2	regulation of cytolysis	3	0.000750946	PGLYRP4;PGLYRP1;HMHB1	inorganic cation transmembrane transporter activity	12	0.0106817	FXYD4;KCNA7;HCN1;SLC32A1;ASIC5;COX6A2;HTR3B;GRIN3A;SCN4A;SLC30A8;RYR1;SLC34A3	pigment metabolic process	4	0.0127171	UGT1A1;RAPGEF2;UGT1A10;UGT1A8	Primary immunodeficiency	4	0.000211924	CD79A;AICDA;CD19;ICOS
negative regulation of hemostasis	5	0.00014376	KRT1;VTN;FGG;PROC;TMPRSS6	Fentanyl	2	0.00125006	OPRM1;OPRK1	Retinol metabolism	5	0.00103719	UGT1A1;UGT2B17;UGT1A8;CYP1A1;UGT2B11	response to stimulus involved in regulation of muscle adaptation	2	0.0108907	CASQ1;PRKAG3	Erlotinib	2	0.0135988	UGT1A1;CYP3A4	blood microparticle	6	0.000232448	HBA1;HPR;JCHAIN;FGA;PRSS1;APOA2
carboxylic acid binding	9	0.000151824	CPS1;UGT2B17;TAT;GRM7;GLRA3;UGT1A8;CRABP2;UGT2B7;NOS2	Opium	2	0.00125006	OPRM1;OPRK1	natural killer cell differentiation involved in immune response	2	0.00128551	PGLYRP4;PGLYRP1	postsynaptic membrane	8	0.0111366	PCDH17;DAGLA;ACTN2;SHISA8;CAMK2A;HTR3B;GRIN3A;OPRK1	gated channel activity	10	0.0141084	CACNA1I;GLRA3;CACNG3;GRID2;ASIC5;OPRM1;GRIN2C;KCNV1;KCNC2;CHRNA3	immune response	30	0.000251341	SEMG2;OPRD1;SEMG1;CD247;HTN3;GZMA;MGAM;LBP;CD79A;IRF4;AICDA;IL21;FUT7;SLPI;POU2AF1;TNFRSF17;TARM1;MS4A1;NOS2;IL6;CD19;ICOS;ADAMDEC1;S100A7;IGLL5;JCHAIN;FGA;S100A14;CXCL2;APOA2
negative regulation of coagulation	5	0.000157503	KRT1;VTN;FGG;PROC;TMPRSS6	positive regulation of protein maturation	3	0.00134058	TNP2;NKD2;C6	regulation of natural killer cell differentiation involved in immune response	2	0.00128551	PGLYRP4;PGLYRP1	regulation of potassium ion transport	4	0.0123803	KCNRG;ACTN2;GALR2;OPRK1	MAPK signaling pathway	9	0.0146246	CACNA1I;FGF3;RAPGEF2;FGF4;FGF22;CACNG3;HSPA6;PRKCG;PRKACG	sensory perception of smell	11	0.000416375	OR2T10;SLC24A4;OR5M11;OR14I1;OR2T5;OR10G7;NCAM2;OR6K2;OR2T35;OR10H3;OR2AG1
regulation of defense response	18	0.000159503	CR2;AHSG;PGLYRP4;CD19;KRT1;CXCL17;IRF4;CNR2;TNFAIP8L2;SCGB1A1;VTN;FGG;DUOXA1;PROC;PGLYRP1;IL22RA2;CCL24;NOS2	Hydromorphone	2	0.00165817	OPRM1;OPRK1	peptidoglycan receptor activity	2	0.00128551	PGLYRP4;PGLYRP1	phospholipase C-activating G protein-coupled receptor signaling pathway	4	0.0128261	FPR1;ACTN2;GALR2;OPRK1	Cholinergic synapse	5	0.0150327	PRKCG;CHRM2;CHRM3;PRKACG;CHRNA3	sensory perception of chemical stimulus	12	0.000430676	LCN1;OR2T10;SLC24A4;OR5M11;OR14I1;OR2T5;OR10G7;NCAM2;OR6K2;OR2T35;OR10H3;OR2AG1
sperm capacitation	4	0.000166163	SEMG2;SEMG1;SPINK1;PAEP	opioid receptor activity	2	0.00212098	OPRM1;OPRK1	Naltrexone	2	0.00128551	UGT1A1;OPRD1	voltage-gated sodium channel activity	2	0.0135262	HCN1;SCN4A	integral component of postsynaptic specialization membrane	4	0.0153389	NETO1;CACNG3;GRID2;CHRM3	signaling receptor binding	25	0.000506715	OPRD1;LCN1;FABP4;WNT9B;LBP;CARTPT;IL21;CCKBR;LEFTY2;SPINT3;RSPO4;TARM1;MS4A1;KCNA5;NOS2;IL6;JAKMIP1;S100A7;IGLL5;JCHAIN;FGA;NRXN1;S100A14;CXCL2;APOA2
negative regulation of inflammatory response	7	0.000214838	KRT1;CXCL17;CNR2;TNFAIP8L2;PROC;PGLYRP1;IL22RA2	Oxycodone	2	0.00212098	OPRM1;OPRK1	Porphyrin and chlorophyll metabolism	4	0.00134954	UGT1A1;UGT2B17;UGT1A8;UGT2B11	negative regulation of potassium ion transmembrane transporter activity	2	0.0149372	KCNRG;ACTN2	extracellular ligand-gated ion channel activity	4	0.0160435	GLRA3;GRID2;GRIN2C;CHRNA3	response to oxygen-containing compound	25	0.00060103	AQP2;METTL21C;MAFA;HBA1;WNT9B;LBP;GPD1;GPRC6A;AICDA;SLPI;NPAS4;OTC;ANKRD1;ATP6V0A4;ATP6V0D2;KCNA5;NOS2;IL6;FOSB;FOXA2;S100A7;CA3;S100A14;CXCL2;APOA2
organic acid binding	9	0.000226182	CPS1;UGT2B17;TAT;GRM7;GLRA3;UGT1A8;CRABP2;UGT2B7;NOS2	Dextropropoxyphene	2	0.00212098	OPRM1;OPRK1	blood microparticle	6	0.0015551	GC;ORM1;AGT;KRT1;HSPA6;AHSG	regulation of potassium ion transmembrane transporter activity	3	0.0149815	KCNRG;ACTN2;GALR2	Glutamatergic synapse	5	0.0161168	PRKCG;GRIN2C;PRKACG;SLC17A6;GRM7	regulation of binding of sperm to zona pellucida	2	0.000626295	PAEP;ASTL
Olanzapine	5	0.000241881	ORM1;GABRA1;GABRG2;GABRP;HTR1D	Naldemedine	2	0.00212098	OPRM1;OPRK1	protein heterooligomerization	6	0.00178867	SEMG2;SEMG1;PCBD2;KRT1;HBQ1;KCNC2	cation homeostasis	13	0.0152929	TRDN;METTL21C;BDH2;FPR1;EPO;GALR2;CASQ1;DHRS7C;CSRP3;ACKR2;SLC30A8;RYR1;WBP2NL	intrinsic component of postsynaptic specialization membrane	4	0.017513	NETO1;CACNG3;GRID2;CHRM3	Lormetazepam	2	0.000626295	GABRG2;GABRA1
signaling receptor activity	28	0.000262565	OPRD1;OR2T10;CR2;GABRA1;GRM3;CD79A;CD247;GABRG2;PGLYRP4;GABRP;KRT1;ZP2;TNFRSF17;GRM7;GLRA3;UNC5CL;CNR2;HTR1D;XCR1;SOSTDC1;GPR87;OR5M11;OR14I1;OR7D2;PGLYRP1;IL22RA2;CXCR5;OR4K2	regulation of ion transmembrane transporter activity	7	0.00216912	FXYD4;OPRM1;GALR2;KCNRG;TRDN;SHISA8;STAC3	peptidoglycan metabolic process	2	0.00191367	PGLYRP4;PGLYRP1	negative regulation of calcium ion transport	3	0.0157223	TRDN;EPO;SLN	Rap1 signaling pathway	7	0.017655	CALML5;FGF3;RAPGEF2;FGF4;FGF22;PFN3;PRKCG	Intestinal immune network for IgA production	4	0.000631135	AICDA;TNFRSF17;IL6;ICOS
protein activation cascade	6	0.000269305	IGLL5;CR2;CD19;KRT1;VTN;FGG	response to isoquinoline alkaloid	3	0.00216967	OPRM1;GOT2;OPRK1	peptidoglycan catabolic process	2	0.00191367	PGLYRP4;PGLYRP1	calcium-mediated signaling	6	0.0158537	MYOZ2;TRDN;CASQ1;DEFB1;ACKR2;C10orf71	voltage-gated calcium channel complex	3	0.0178737	CACNA1I;CACNG3;CATSPERD	Malaria	4	0.000631135	HBA1;HBA2;IL6;ACKR1
killing of cells of other organism	5	0.000283848	SEMG1;PGLYRP4;FCER2;PGLYRP1;NOS2	response to morphine	3	0.00216967	OPRM1;GOT2;OPRK1	flavone metabolic process	2	0.00191367	UGT1A1;UGT1A8	cation transmembrane transporter activity	12	0.0190138	FXYD4;KCNA7;HCN1;SLC32A1;ASIC5;COX6A2;HTR3B;GRIN3A;SCN4A;SLC30A8;RYR1;SLC34A3	organic anion transmembrane transporter activity	7	0.0180796	SLCO1B7;SLC6A15;SLC38A11;SLC36A3;SLC17A6;SLC22A6;SLC2A2	Topiramate	3	0.000898875	GABRG2;GABRA1;CA3
disruption of cells of other organism	5	0.000283848	SEMG1;PGLYRP4;FCER2;PGLYRP1;NOS2	regulation of cation transmembrane transport	8	0.0027254	FXYD4;OPRM1;GALR2;KCNRG;TRDN;SHISA8;OPRK1;STAC3	vitamin D binding	2	0.00191367	IRX5;GC	positive regulation of potassium ion transmembrane transporter activity	2	0.0195278	ACTN2;GALR2	ion channel activity	11	0.0192072	CACNA1I;GLRA3;CACNG3;TRPC5;GRID2;ASIC5;OPRM1;GRIN2C;KCNV1;KCNC2;CHRNA3	positive regulation of respiratory burst	2	0.000934506	LBP;JCHAIN
amino acid binding	5	0.000283848	CPS1;TAT;GRM7;GLRA3;NOS2	intrinsic component of postsynaptic membrane	5	0.00275361	PCDH17;DAGLA;OPRM1;LRRTM2;OPRK1	Nalmefene	2	0.00191367	OPRD1;UGT1A8	transmembrane signaling receptor activity	19	0.0195515	UNC5C;PTPRR;BMPR2;OR51B4;FPR1;KIR3DL1;GALR2;OR1A1;GPR25;GPR101;OXGR1;HTR3B;OR6K2;OR3A3;ACKR2;GRIN3A;OR7C2;OPRK1;OR10G7	cellular sodium ion homeostasis	2	0.0198151	AGT;ATP12A	neuronal dense core vesicle	2	0.000934506	OPRD1;SYT4
Morphine	3	0.000299138	OPRD1;UGT1A8;UGT2B7	molecular transducer activity	22	0.00287456	UNC5C;OR51G2;CDKL4;OPRM1;OR51B4;OR7G3;UNC5A;PTPRR;KIR3DL1;OXGR1;RXFP2;GALR2;OR7C2;OR10W1;GPR101;BRS3;OPRK1;HTR3B;BMPR2;OPN1MW3;PKHD1L1;OR1A1	retinoic acid metabolic process	3	0.00196282	UGT1A1;UGT1A8;CYP1A1	synaptic membrane	9	0.0206701	PCDH17;DAGLA;ACTN2;SHISA8;CAMK2A;HTR3B;GRIN3A;FOSL1;OPRK1	calcium channel activity	5	0.0203177	CACNA1I;CACNG3;TRPC5;OPRM1;GRIN2C	regulation of cytokine biosynthetic process	5	0.000951236	LBP;IRF4;IL21;IL6;APOA2
defense response	29	0.000307699	SEMG2;SEMG1;ORM1;IGLL5;CR2;AHSG;PGLYRP4;CD19;KRT1;APOA2;CXCL17;GRM7;IRF4;CXCL1;CNR2;TNFAIP8L2;SCGB1A1;HPR;VTN;KRT16;PLGRKT;XCR1;FGG;DUOXA1;PROC;PGLYRP1;IL22RA2;CCL24;NOS2	perikaryon	5	0.00316455	OPRM1;LRIT3;GOT2;OPRK1;NGB	natural killer cell differentiation	3	0.00196282	PGLYRP4;PGLYRP1;HNF1A	positive regulation of calcium ion transport	4	0.0220109	TRDN;STAC3;CASQ1;CAMK2A	G protein-coupled acetylcholine receptor signaling pathway	2	0.022105	CHRM2;CHRM3	adult behavior	6	0.00095965	OPRD1;GABRG2;CARTPT;EN1;FOXA2;NRXN1
Copper	8	0.000332215	AHSG;MT1HL1;KRT1;APOA2;SERPINA4;AOC1;HPR;VTN	netrin-activated signaling pathway	2	0.00320721	UNC5C;UNC5A	Amitriptyline	4	0.00222356	UGT1A1;ORM1;OPRD1;HTR1D	response to external biotic stimulus	15	0.0225992	IL12A;BIRC2;TRDN;IFNA6;CA3;LYPD8;EPO;BTBD17;DEFB1;GALP;ANKRD1;GPC3;FOSL1;PDCD1LG2;OPRK1	Pazopanib	2	0.022105	UGT1A1;CYP3A4	Olfactory transduction	11	0.0009761	OR2T10;SLC24A4;OR5M11;OR14I1;OR2T5;OR10G7;OR6K2;OR2T35;OR10H3;OR2AG1;OR6J1
Propofol	4	0.000390932	GABRA1;GABRG2;GABRP;UGT1A8	Codeine	2	0.00320721	OPRM1;OPRK1	xenobiotic metabolic process	6	0.00223589	UGT1A1;UGT1A8;CYP1A1;DPEP1;UGT2B11;AOC1	response to biotic stimulus	15	0.0284291	IL12A;BIRC2;TRDN;IFNA6;CA3;LYPD8;EPO;BTBD17;DEFB1;GALP;ANKRD1;GPC3;FOSL1;PDCD1LG2;OPRK1	cation channel activity	9	0.0225807	CACNA1I;CACNG3;TRPC5;ASIC5;OPRM1;GRIN2C;KCNV1;KCNC2;CHRNA3	defense response	24	0.000979574	SEMG2;SEMG1;FABP4;HTN3;IL22RA2;LBP;HPR;IRF4;AICDA;IL21;C2CD4B;SLPI;TARM1;NOS2;IL6;CD19;S100A7;IGLL5;JCHAIN;FGA;ACKR1;S100A14;CXCL2;APOA2
serine-type endopeptidase activity	8	0.000400357	KLK14;MMP13;PRSS1;HPR;PROC;PRSS50;TMPRSS11A;TMPRSS6	Tapentadol	2	0.00320721	OPRM1;OPRK1	hormone activity	6	0.00233462	TG;CGA;AGT;GRP;UTS2B;RLN1	synaptic vesicle cycle	5	0.0358556	PCDH17;CAMK2A;SLC32A1;GRIN3A;SLC17A8	voltage-gated calcium channel activity	3	0.022623	CACNA1I;CACNG3;OPRM1	positive regulation of granulocyte chemotaxis	3	0.00101548	LBP;S100A7;S100A14
inhibitory extracellular ligand-gated ion channel activity	3	0.000453704	GABRA1;GABRG2;GLRA3	regulation of transporter activity	7	0.00338516	FXYD4;OPRM1;GALR2;KCNRG;TRDN;SHISA8;STAC3	Chemical carcinogenesis	5	0.00255098	UGT1A1;UGT2B17;UGT1A8;CYP1A1;UGT2B11	negative regulation of calcium ion transmembrane transporter activity	2	0.0362394	TRDN;SLN	adenylate cyclase-inhibiting G protein-coupled receptor signaling pathway	4	0.0251473	CHRM2;OPRM1;CHRM3;GRM7	adaptive immune response	10	0.00102708	CD247;CD79A;IRF4;AICDA;TNFRSF17;TARM1;IL6;IGLL5;JCHAIN;FGA
Ethchlorvynol	3	0.000453704	GABRA1;GABRG2;GABRP	opioid receptor signaling pathway	2	0.00382891	OPRM1;OPRK1	motor behavior	2	0.00265887	GRP;GRPR	voltage-gated ion channel activity	5	0.0386215	KCNA7;HCN1;GRIN3A;SCN4A;RYR1	ATPase activity, coupled to movement of substances	5	0.0259278	ABCA12;ABCB5;ATP12A;ATP8A2;ABCC12	response to lipopolysaccharide	9	0.0010439	LBP;AICDA;SLPI;ANKRD1;NOS2;IL6;S100A7;S100A14;CXCL2
Flumazenil	3	0.000453704	GABRA1;GABRG2;GABRP	Loperamide	2	0.00382891	OPRM1;OPRK1	oxidoreductase activity, acting on paired donors, with incorporation or reduction of molecular oxygen, reduced pteridine as one donor, and incorporation of one atom of oxygen	2	0.00265887	PCBD2;AGMO	voltage-gated channel activity	5	0.0386215	KCNA7;HCN1;GRIN3A;SCN4A;RYR1	synaptic transmission, glutamatergic	4	0.029092	CACNG3;GRID2;SLC17A6;GRM7	spermatid development	6	0.00107023	SEMG2;SEMG1;SPINK2;PAEP;SYCP1;FAM9A
Fludiazepam	3	0.000453704	GABRA1;GABRG2;GABRP	signaling receptor activity	21	0.00385962	UNC5C;OR51G2;OPRM1;OR51B4;OR7G3;UNC5A;PTPRR;KIR3DL1;OXGR1;RXFP2;GALR2;OR7C2;OR10W1;GPR101;BRS3;OPRK1;HTR3B;BMPR2;OPN1MW3;PKHD1L1;OR1A1	Ginkgo biloba	2	0.00265887	PLA2G2A;GABRA1	G protein-coupled receptor binding	6	0.0400712	FPR1;CCL16;DEFB1;APLN;WNT4;NPW	catecholamine metabolic process	3	0.0294307	DBH;TH;INSM1	cellular response to copper ion	3	0.00114124	AQP2;MT1A;MT1M
Cinolazepam	3	0.000453704	GABRA1;GABRG2;GABRP	Tramadol	2	0.00450188	OPRM1;OPRK1	regulation of hormone levels	14	0.00266178	TG;UGT1A1;CGA;AGT;FOXA2;NMU;UGT1A8;CYP1A1;GRP;CACNA2D2;CHAT;UGT2B11;HNF1A;KCNC2	G protein-coupled receptor activity	13	0.0410631	OR51B4;FPR1;GALR2;OR1A1;GPR25;GPR101;OXGR1;OR6K2;OR3A3;ACKR2;OR7C2;OPRK1;OR10G7	catechol-containing compound metabolic process	3	0.0294307	DBH;TH;INSM1	Maturity onset diabetes of the young	3	0.00114124	MAFA;NEUROG3;FOXA2
molecular transducer activity	28	0.000503239	OPRD1;OR2T10;CR2;GABRA1;GRM3;CD79A;CD247;GABRG2;PGLYRP4;GABRP;KRT1;ZP2;TNFRSF17;GRM7;GLRA3;UNC5CL;CNR2;HTR1D;XCR1;SOSTDC1;GPR87;OR5M11;OR14I1;OR7D2;PGLYRP1;IL22RA2;CXCR5;OR4K2	Naloxone	2	0.00450188	OPRM1;OPRK1	integral component of plasma membrane	31	0.00270458	PCDHA10;PLGRKT;PCDHA6;PCDHA4;RXFP1;UGT1A1;PCDHGB5;PCDHA8;SLC3A1;OPRD1;GLRA3;GRM7;ATP12A;PCDHA11;HTR1D;PCDHA12;RHBG;RAPGEF2;CNTNAP2;XCR1;GRID2;GPR12;GRPR;GRM3;ECEL1;PCDHAC1;TMC1;ADGRG7;SLC16A14;GABRA1;KCNC2	ion channel activity	8	0.0427489	FXYD4;KCNA7;HCN1;ASIC5;HTR3B;GRIN3A;SCN4A;RYR1	Ras signaling pathway	7	0.0311528	CALML5;PLA2G2A;FGF3;FGF4;FGF22;PRKCG;PRKACG	detection of chemical stimulus	11	0.00114567	OR2T10;LBP;OR5M11;OR14I1;OR2T5;OR10G7;OR6K2;OR2T35;FOXA2;OR10H3;OR2AG1
complement activation	5	0.000509084	IGLL5;CR2;CD19;KRT1;VTN	estrous cycle	2	0.00522529	OPRM1;OPRK1	Zinc	6	0.00276267	AGT;SERPIND1;SEMG1;SERPINA4;KRT1;AHSG	RNA polymerase II transcription factor binding	4	0.0432548	ANKRD2;TBP;NEUROD1;ANKRD1	calcium ion transmembrane transporter activity	5	0.0324433	CACNA1I;CACNG3;TRPC5;OPRM1;GRIN2C	positive regulation of cytokine biosynthetic process	4	0.00119542	LBP;IRF4;IL21;APOA2
Methyprylon	3	0.00054702	GABRA1;GABRG2;GABRP	Morphine	2	0.00522529	OPRM1;OPRK1	cellular response to copper ion	3	0.0032038	MT1HL1;CYP1A1;AOC1	negative regulation of calcium ion transmembrane transport	2	0.0449264	TRDN;SLN	G protein-coupled amine receptor activity	3	0.0371987	CHRM2;CHRM3;OR5T2	Ginkgo biloba	2	0.00130144	GABRG2;GABRA1
Lorazepam	3	0.000651771	GABRA1;GABRG2;GABRP	neuron part	23	0.00635058	ACTL6B;UNC5C;PCDH17;DAGLA;OPRM1;UNC5A;LRRTM2;CPLX2;CROCC;LRIT3;BAIAP3;LOXHD1;LRRC30;GOT2;BRS3;SYNGR4;SHISA8;OPRK1;HTR3B;NGB;BMPR2;OPN1MW3;HCN1	retinoic acid binding	3	0.0032038	UGT1A1;UGT2B17;UGT1A8	voltage-gated cation channel activity	4	0.0451649	KCNA7;HCN1;GRIN3A;RYR1	G protein-coupled peptide receptor activity	5	0.0379449	RXFP1;GPR83;GHRHR;OPRM1;NMBR	spermatid differentiation	6	0.00132052	SEMG2;SEMG1;SPINK2;PAEP;SYCP1;FAM9A
Meprobamate	3	0.000651771	GABRA1;GABRG2;GABRP	peptide receptor activity	5	0.00642484	OPRM1;RXFP2;GALR2;BRS3;OPRK1	Maturity onset diabetes of the young	3	0.0032038	PAX6;FOXA2;HNF1A	transforming growth factor beta receptor activity, type II	1	0.0461296	BMPR2	voltage-gated ion channel activity	6	0.042715	CACNA1I;CACNG3;OPRM1;GRIN2C;KCNV1;KCNC2	response to molecule of bacterial origin	9	0.00137973	LBP;AICDA;SLPI;ANKRD1;NOS2;IL6;S100A7;S100A14;CXCL2
Chlordiazepoxide	3	0.000651771	GABRA1;GABRG2;GABRP	neuropeptide receptor activity	3	0.00668783	OPRM1;GALR2;BRS3	flagellated sperm motility	5	0.00329894	DNAH11;SEMG2;SEMG1;CACNA1I;SLC22A16	G protein-coupled peptide receptor activity	4	0.0461374	FPR1;GALR2;ACKR2;OPRK1	voltage-gated channel activity	6	0.042715	CACNA1I;CACNG3;OPRM1;GRIN2C;KCNV1;KCNC2	acute inflammatory response	6	0.00151069	LBP;HPR;C2CD4B;IL6;CD19;APOA2
Adinazolam	3	0.000651771	GABRA1;GABRG2;GABRP	cilium	11	0.00685821	CEP295NL;SPATA4;DNAI2;SAXO2;CFAP77;CROCC;LRRC30;OPN1MW3;FSCB;PKHD1L1;CFAP45	sperm motility	5	0.00329894	DNAH11;SEMG2;SEMG1;CACNA1I;SLC22A16	positive regulation of release of sequestered calcium ion into cytosol	2	0.049529	TRDN;CASQ1	regulation of catecholamine secretion	3	0.0440923	AGT;VIP;GHSR	cell surface	15	0.00153583	LBP;CD79A;FCRL5;GPRC6A;CDH18;MSLN;FCRL2;MS4A1;KCNA5;CD19;ICOS;IGLL5;FGA;NRXN1;CD69
Clorazepate	3	0.000651771	GABRA1;GABRG2;GABRP	Ketobemidone	2	0.00768999	OPRM1;OPRK1	cellular response to histamine	2	0.00351837	GABRA1;AOC1	muscle structure development	34	0	ANKRD2;MYLK2;MYLK3;MYOZ2;METTL21C;KLHL41;MYOM3;STAC3;MYO18B;ACTN2;ACTA1;CASQ1;VGLL2;CAVIN4;MYPN;MYH7;SMYD1;UNC45B;ANKRD1;TNNI1;MYL2;NRAP;CSRP3;WNT4;LMOD2;SYNPO2L;MYOM1;TRIM54;MYOM2;TNNT1;TRIM72;RYR1;TTN;MYOD1	nervous system process	53	1.5854e-13	DRGX;RS1;DBH;CACNA1I;CST1;CST4;SEZ6;GLRA3;IAPP;AGT;OTOG;NETO1;CACNG3;OR4A5;GRID2;USH1C;CRYGD;OR5J2;CST2;TAS2R43;RP1;VIP;FFAR4;PRKCG;OBP2B;BARHL1;OR6K6;OR56B4;COL2A1;CA6;OR51G2;SMR3A;PHOX2B;POU6F2;OR7G3;OPRM1;OR10W1;GRIN2C;POU4F2;ADAM2;OR52H1;OR1J4;OR5C1;OR14A16;OR5K4;OBP2A;ATP8A2;TH;OR5T2;CHRNA3;GHSR;GRM7;OR9Q2	chemical homeostasis	19	0.00154027	AQP2;METTL21C;MT1A;FABP4;SLC24A4;RHCG;CARTPT;PVALB;CCKBR;OTC;CALB2;ATP6V0A4;ATP6V0D2;KCNA5;CD19;FOXA2;S100A14;MT1M;APOA2
Glutethimide	3	0.000651771	GABRA1;GABRG2;GABRP	regulation of ion transmembrane transport	9	0.00808003	FXYD4;OPRM1;GALR2;KCNRG;TRDN;SHISA8;OPRK1;STAC3;HCN1	phenylpropanoid metabolic process	2	0.00351837	UGT1A8;CYP1A1	muscle cell differentiation	27	0	ANKRD2;MYLK3;MYOZ2;KLHL41;MYOM3;STAC3;MYO18B;ACTN2;ACTA1;CASQ1;MYPN;SMYD1;ANKRD1;MYL2;NRAP;CSRP3;WNT4;LMOD2;SYNPO2L;MYOM1;TRIM54;MYOM2;TNNT1;TRIM72;RYR1;TTN;MYOD1	sensory perception	39	3.37879e-11	DRGX;RS1;CST1;CST4;IAPP;OTOG;OR4A5;USH1C;CRYGD;OR5J2;CST2;TAS2R43;RP1;VIP;FFAR4;OBP2B;BARHL1;OR6K6;OR56B4;COL2A1;CA6;OR51G2;SMR3A;POU6F2;OR7G3;OPRM1;OR10W1;POU4F2;OR52H1;OR1J4;OR5C1;OR14A16;OR5K4;OBP2A;ATP8A2;TH;OR5T2;GRM7;OR9Q2	cytokine biosynthetic process	5	0.00156003	LBP;IRF4;IL21;IL6;APOA2
Thiocolchicoside	3	0.000651771	GABRA1;GABRG2;GABRP	retina vasculature development in camera-type eye	2	0.00860703	LAMA1;BMPR2	coumarin metabolic process	2	0.00351837	UGT1A8;CYP1A1	striated muscle cell differentiation	25	0	ANKRD2;MYLK3;MYOZ2;KLHL41;MYOM3;STAC3;MYO18B;ACTN2;ACTA1;CASQ1;MYPN;SMYD1;ANKRD1;MYL2;NRAP;CSRP3;LMOD2;SYNPO2L;MYOM1;MYOM2;TNNT1;TRIM72;RYR1;TTN;MYOD1	Pethidine	6	2.70664e-07	CYP3A4;CYP2B6;CHRM2;OPRM1;CHRM3;GRIN2C	sperm capacitation	3	0.00157598	SEMG2;SEMG1;PAEP
negative regulation of wound healing	5	0.000662401	KRT1;VTN;FGG;PROC;TMPRSS6	Buprenorphine	2	0.00860703	OPRM1;OPRK1	negative regulation of natural killer cell activation	2	0.00351837	PGLYRP4;PGLYRP1	contractile fiber	30	0	ANKRD2;MYLK2;MYOZ2;KLHL41;MYOM3;MYO18B;ACTN2;ACTA1;CASQ1;CAVIN4;MYPN;MYH7;ANKRD1;TNNI1;MYL2;NRAP;CSRP3;LMOD2;ABRA;SYNPO2L;MYOM1;TRIM54;MYOM2;C10orf71;TNNT1;RYR1;TTN;MYH8;SMPX;MYOD1	Tramadol	5	4.04011e-07	UGT1A1;CYP3A4;CYP2B6;OPRM1;CHRM3	transmembrane signaling receptor activity	20	0.00160648	OPRD1;GABRG2;CD247;OR2T10;IL22RA2;OR5M11;GRM3;OR14I1;CD79A;GPRC6A;OR2T5;CCKBR;OR10G7;GABRA1;OR6K2;OR2T35;CD69;OR10H3;OR2AG1;ACKR1
antimicrobial humoral response	6	0.000701155	SEMG2;SEMG1;ITLN1;PGLYRP4;CXCL1;PGLYRP1	structural constituent of eye lens	2	0.0095705	CRYGD;LIM2	Riociguat	2	0.00351837	ORM1;CYP1A1	myofibril	30	0	ANKRD2;MYLK2;MYOZ2;KLHL41;MYOM3;MYO18B;ACTN2;ACTA1;CASQ1;CAVIN4;MYPN;MYH7;ANKRD1;TNNI1;MYL2;NRAP;CSRP3;LMOD2;ABRA;SYNPO2L;MYOM1;TRIM54;MYOM2;C10orf71;TNNT1;RYR1;TTN;MYH8;SMPX;MYOD1	detection of chemical stimulus involved in sensory perception	20	6.91756e-07	CST1;CST4;OR4A5;OR5J2;CST2;TAS2R43;FFAR4;OR6K6;OR56B4;CA6;OR51G2;OR7G3;OR10W1;OR52H1;OR1J4;OR5C1;OR14A16;OR5K4;OR5T2;OR9Q2	cytokine metabolic process	5	0.00162686	LBP;IRF4;IL21;IL6;APOA2
retinoid binding	4	0.000710074	UGT2B17;UGT1A8;CRABP2;UGT2B7	neuron projection membrane	3	0.0101498	OPRM1;UNC5A;SHISA8	glutamate receptor activity	3	0.00357401	GRM7;GRID2;GRM3	contractile fiber part	29	0	ANKRD2;MYLK2;MYOZ2;KLHL41;MYOM3;MYO18B;ACTN2;ACTA1;CASQ1;CAVIN4;MYPN;MYH7;ANKRD1;TNNI1;MYL2;NRAP;CSRP3;LMOD2;ABRA;SYNPO2L;MYOM1;TRIM54;MYOM2;C10orf71;TNNT1;RYR1;TTN;MYH8;SMPX	detection of stimulus	25	6.98879e-07	DRGX;RS1;CST1;CST4;OR4A5;OR5J2;CST2;TAS2R43;RP1;FFAR4;OR6K6;OR56B4;CA6;OR51G2;OR7G3;OR10W1;OR52H1;OR1J4;OR5C1;OR14A16;OR5K4;ATP8A2;OR5T2;PDX1;OR9Q2	cellular response to histamine	2	0.00172614	GABRG2;GABRA1
cornification	6	0.000735366	KLK14;KRT1;KRT24;KRT5;KRT16;KRT81	anchored component of membrane	5	0.0102424	TEX101;LYPD8;LY6H;MDGA2;ART1	Butamben	3	0.00357401	ORM1;CACNA2D2;CACNA1I	sarcomere	29	0	ANKRD2;MYLK2;MYOZ2;KLHL41;MYOM3;MYO18B;ACTN2;ACTA1;CASQ1;CAVIN4;MYPN;MYH7;ANKRD1;TNNI1;MYL2;NRAP;CSRP3;LMOD2;ABRA;SYNPO2L;MYOM1;TRIM54;MYOM2;C10orf71;TNNT1;RYR1;TTN;MYH8;SMPX	detection of stimulus involved in sensory perception	21	1.0967e-06	CST1;CST4;OR4A5;OR5J2;CST2;TAS2R43;FFAR4;OR6K6;OR56B4;CA6;OR51G2;OR7G3;OR10W1;OR52H1;OR1J4;OR5C1;OR14A16;OR5K4;ATP8A2;OR5T2;OR9Q2	spherical high-density lipoprotein particle	2	0.00172614	HPR;APOA2
immune response	33	0.000750867	SEMG2;OPRD1;SEMG1;ORM1;POU2AF1;ITLN1;IGLL5;CR2;CD79A;CD247;AHSG;PGLYRP4;CD19;KRT1;APOA2;TNFRSF17;AOC1;IRF4;CXCL1;CNR2;TNFAIP8L2;VTCN1;FCER2;VTN;KRT16;FUT7;XCR1;FGG;MS4A1;PGLYRP1;CCL24;NOS2;CXCR5	endopeptidase inhibitor activity	5	0.0102424	BIRC2;LCN1;CST1;CST4;BIRC5	nitric oxide mediated signal transduction	3	0.00396931	SPINK1;AGT;KCNC2	muscle cell development	23	0	MYLK3;MYOZ2;KLHL41;MYOM3;STAC3;MYO18B;ACTN2;ACTA1;CASQ1;MYPN;ANKRD1;MYL2;NRAP;CSRP3;LMOD2;SYNPO2L;MYOM1;TRIM54;MYOM2;TNNT1;RYR1;TTN;MYOD1	xenobiotic glucuronidation	4	8.27926e-06	UGT1A1;UGT1A10;UGT1A8;UGT2B11	Etizolam	2	0.00172614	GABRG2;GABRA1
acute inflammatory response	7	0.000756898	ORM1;CR2;AHSG;CD19;APOA2;HPR;VTN	fibroblast growth factor receptor signaling pathway	4	0.0103685	FGF4;FGF3;LRIT3;APLN	Diclofenac	3	0.00396931	UGT1A1;PLA2G2A;CYP1A1	striated muscle cell development	22	0	MYLK3;MYOZ2;KLHL41;MYOM3;STAC3;MYO18B;ACTN2;ACTA1;CASQ1;MYPN;ANKRD1;MYL2;NRAP;CSRP3;LMOD2;SYNPO2L;MYOM1;MYOM2;TNNT1;RYR1;TTN;MYOD1	odorant binding	8	1.38991e-05	OR5J2;OBP2B;OR10W1;OR5C1;OR14A16;OR5K4;OBP2A;OR9Q2	protein homotrimerization	3	0.00210209	CD247;OTC;TCL1A
cellular glucuronidation	3	0.000768495	UGT2B17;UGT1A8;UGT2B7	cartilage condensation	2	0.0105796	FGF4;COL2A1	neuron projection membrane	4	0.00416605	OPRD1;CNTNAP2;GABRA1;KCNC2	I band	19	0	ANKRD2;MYOZ2;MYOM3;MYO18B;ACTN2;CASQ1;CAVIN4;MYPN;MYH7;ANKRD1;NRAP;CSRP3;SYNPO2L;MYOM1;TRIM54;MYOM2;C10orf71;RYR1;TTN	Brompheniramine	4	1.75774e-05	CYP3A4;CYP2B6;CHRM2;CHRM3	Adipiplon	2	0.00220769	GABRG2;GABRA1
GABA-A receptor complex	3	0.000768495	GABRA1;GABRG2;GABRP	intrinsic component of plasma membrane	22	0.0111387	PCDH17;TEX101;FXYD4;APH1B;BIRC2;TPBG;DAGLA;OPRM1;UNC5A;KIR3DL1;LRRTM2;RXFP2;GALR2;GPR101;BRS3;SHISA8;OPRK1;HTR3B;BMPR2;OPN1MW3;C6;HCN1	sperm capacitation	3	0.00439018	SPINK1;SEMG2;SEMG1	cellular component assembly involved in morphogenesis	18	0	MYLK3;MYOZ2;KLHL41;MYOM3;ACTN2;ACTA1;CASQ1;MYPN;ANKRD1;MYL2;NRAP;CSRP3;LMOD2;SYNPO2L;MYOM1;MYOM2;TNNT1;TTN	Naltrexone	3	2.07585e-05	UGT1A1;CYP3A4;OPRM1	5,7,2鈥?trihydroxy-6,8-dimethoxyflavone	2	0.00220769	GABRG2;GABRA1
GABA-A receptor activity	3	0.000768495	GABRA1;GABRG2;GABRP	regulation of protein processing	4	0.0113814	TNP2;BIRC2;NKD2;C6	Olanzapine	4	0.00443502	UGT1A1;ORM1;HTR1D;GABRA1	myofibril assembly	18	0	MYLK3;MYOZ2;KLHL41;MYOM3;ACTN2;ACTA1;CASQ1;MYPN;ANKRD1;MYL2;NRAP;CSRP3;LMOD2;SYNPO2L;MYOM1;MYOM2;TNNT1;TTN	Salivary secretion	8	2.11841e-05	CALML5;CST1;CST4;CST2;PRKCG;CHRM3;PRKACG;AMY1C	signaling receptor activity	22	0.00226381	OPRD1;GABRG2;CD247;OR2T10;IL22RA2;OR5M11;GRM3;OR14I1;CD79A;GPRC6A;OR2T5;TNFRSF17;CCKBR;OR10G7;GABRA1;OR6K2;OR2T35;NRXN1;CD69;OR10H3;OR2AG1;ACKR1
Halazepam	3	0.000768495	GABRA1;GABRG2;GABRP	cell aggregation	2	0.0116336	FGF4;COL2A1	Copper	7	0.00444475	AGT;MT1HL1;SERPIND1;SERPINA4;KRT1;AHSG;AOC1	sarcomere organization	14	0	MYLK3;MYOZ2;KLHL41;MYOM3;ACTN2;CASQ1;MYPN;ANKRD1;LMOD2;SYNPO2L;MYOM1;MYOM2;TNNT1;TTN	Morphine	4	2.43596e-05	UGT1A1;CYP3A4;UGT1A8;OPRM1	homeostatic process	26	0.00247272	AQP2;METTL21C;MT1A;LCN1;FABP4;SLC24A4;RHCG;IRF4;CARTPT;PVALB;TNFRSF17;CCKBR;ZSCAN4;OTC;CALB2;ATP6V0A4;ATP6V0D2;KCNA5;NOS2;IL6;CD19;FOXA2;JCHAIN;S100A14;MT1M;APOA2
Flunitrazepam	3	0.000768495	GABRA1;GABRG2;UGT2B7	regulation of appetite	2	0.0116336	OPRM1;GALP	basic amino acid transmembrane transport	2	0.00448946	SLC3A1;AGT	striated muscle tissue development	26	4.44089e-16	ANKRD2;MYLK2;MYLK3;MYOZ2;METTL21C;KLHL41;BMPR2;MYOM3;STAC3;MYO18B;ACTN2;ACTA1;CASQ1;VGLL2;MYH7;SMYD1;ANKRD1;TNNI1;MYL2;NRAP;CSRP3;MYOM1;MYOM2;RYR1;TTN;MYOD1	Diclofenac	5	2.63418e-05	UGT1A1;PLA2G2A;CYP3A4;CYP2B6;SLC22A6	sensory perception	16	0.00256545	OPRD1;LCN1;OR2T10;SLC24A4;RBP3;OR5M11;OR14I1;OR2T5;OR10G7;ATP6V0A4;NCAM2;OR6K2;OR2T35;GJD2;OR10H3;OR2AG1
serine-type peptidase activity	8	0.000848277	KLK14;MMP13;PRSS1;HPR;PROC;PRSS50;TMPRSS11A;TMPRSS6	peptidase inhibitor activity	5	0.0120749	BIRC2;LCN1;CST1;CST4;BIRC5	flavonoid glucuronidation	2	0.00448946	UGT1A1;UGT1A8	muscle tissue development	26	1.33227e-15	ANKRD2;MYLK2;MYLK3;MYOZ2;METTL21C;KLHL41;BMPR2;MYOM3;STAC3;MYO18B;ACTN2;ACTA1;CASQ1;VGLL2;MYH7;SMYD1;ANKRD1;TNNI1;MYL2;NRAP;CSRP3;MYOM1;MYOM2;RYR1;TTN;MYOD1	Ketamine	5	2.63418e-05	CYP3A4;CYP2B6;CHRM2;OPRM1;CHRM3	detoxification	5	0.00260233	MT1A;HBA1;PON3;GSTA1;MT1M
isoprenoid binding	4	0.000848353	UGT2B17;UGT1A8;CRABP2;UGT2B7	endopeptidase regulator activity	5	0.0120749	BIRC2;LCN1;CST1;CST4;BIRC5	Oxycodone	2	0.00448946	ORM1;OPRD1	Z disc	17	2.66454e-15	MYOZ2;MYOM3;MYO18B;ACTN2;CASQ1;CAVIN4;MYPN;MYH7;NRAP;CSRP3;SYNPO2L;MYOM1;TRIM54;MYOM2;C10orf71;RYR1;TTN	Valproic Acid	6	3.36373e-05	UGT1A1;CYP3A4;UGT1A10;UGT1A8;CYP2B6;SLC22A6	regulation of protein secretion	10	0.00271616	PAEP;CARTPT;ANKRD1;KCNA5;NOS2;IL6;FOXA2;FGA;SYT4;APOA2
GABA receptor complex	3	0.00089771	GABRA1;GABRG2;GABRP	regulation of protein maturation	4	0.0120909	TNP2;BIRC2;NKD2;C6	Troglitazone	3	0.00483709	UGT1A1;UGT1A8;CYP1A1	muscle system process	27	3.44169e-15	ANKRD2;MYLK2;MYOZ2;TRDN;KLHL41;MYOM3;STAC3;ACTN2;ACTA1;GALR2;CASQ1;MYH7;TNNI1;MYL2;CSRP3;LMOD2;MYOM1;SLN;MYOM2;SCN4A;TNNT1;TRIM72;RYR1;TTN;MYH8;SMPX;MYOD1	Amitriptyline	6	3.36373e-05	UGT1A1;CYP3A4;CYP2B6;CHRM2;OPRM1;CHRM3	dopaminergic neuron differentiation	3	0.00272569	WNT9B;EN1;FOXA2
Butabarbital	3	0.00089771	GABRA1;GABRG2;GABRP	negative regulation of cyclase activity	2	0.0127318	OPRM1;GALR2	intrinsic component of plasma membrane	31	0.00541783	PCDHA10;PLGRKT;PCDHA6;PCDHA4;RXFP1;UGT1A1;PCDHGB5;PCDHA8;SLC3A1;OPRD1;GLRA3;GRM7;ATP12A;PCDHA11;HTR1D;PCDHA12;RHBG;RAPGEF2;CNTNAP2;XCR1;GRID2;GPR12;GRPR;GRM3;ECEL1;PCDHAC1;TMC1;ADGRG7;SLC16A14;GABRA1;KCNC2	actomyosin structure organization	19	1.02141e-14	MYLK3;MYOZ2;KLHL41;MYOM3;ACTN2;ACTA1;CASQ1;MYPN;ANKRD1;MYL2;NRAP;CSRP3;WNT4;LMOD2;SYNPO2L;MYOM1;MYOM2;TNNT1;TTN	Troglitazone	5	3.74011e-05	UGT1A1;CYP3A4;UGT1A10;UGT1A8;CYP2B6	glucagon secretion	2	0.00274514	CARTPT;IL6
Butalbital	3	0.00089771	GABRA1;GABRG2;GABRP	Pethidine	2	0.0127318	OPRM1;OPRK1	cytolysis in other organism	2	0.0055695	PGLYRP4;PGLYRP1	muscle contraction	24	1.37668e-14	ANKRD2;MYLK2;TRDN;KLHL41;MYOM3;STAC3;ACTN2;ACTA1;GALR2;CASQ1;MYH7;TNNI1;MYL2;CSRP3;LMOD2;MYOM1;MYOM2;SCN4A;TNNT1;TRIM72;RYR1;TTN;MYH8;SMPX	molecular transducer activity	38	3.76067e-05	ADGRG7;RXFP1;GLRA3;CDKL4;OR4A5;GRID2;REG4;OR5J2;FOLR3;UNC5A;GPR83;TAS2R43;FFAR4;GHRHR;OR6K6;OR56B4;OR51G2;TNFRSF13B;CHRM2;CDK15;OR7G3;OPRM1;CHRM3;OR10W1;GRIN2C;PRKACG;OR52H1;OR1J4;OR5C1;OR14A16;OR5K4;OR5T2;CD244;CHRNA3;GHSR;GRM7;NMBR;OR9Q2	proton-transporting V-type ATPase, V0 domain	2	0.00274514	ATP6V0A4;ATP6V0D2
Talbutal	3	0.00089771	GABRA1;GABRG2;GABRP	sensory perception of taste	3	0.0144812	LCN1;CST1;CST4	ammonium transmembrane transporter activity	3	0.00581079	SLC44A5;RHBG;SLC22A16	muscle organ development	24	1.67977e-13	ANKRD2;MYLK2;MYOZ2;METTL21C;KLHL41;MYOM3;STAC3;ACTA1;CASQ1;VGLL2;CAVIN4;MYH7;SMYD1;UNC45B;ANKRD1;TNNI1;MYL2;CSRP3;MYOM1;MYOM2;TRIM72;RYR1;TTN;MYOD1	norepinephrine biosynthetic process	3	4.1121e-05	DBH;TH;INSM1	peptidase inhibitor activity	6	0.00279194	SPINK2;LCN1;SLPI;SPINT3;SPOCK2;PI16
Alprazolam	3	0.00089771	GABRA1;GABRG2;GABRP	neuronal cell body	9	0.0145554	OPRM1;UNC5A;CPLX2;LRIT3;GOT2;BRS3;OPRK1;NGB;BMPR2	response to histamine	2	0.00675586	GABRA1;AOC1	supramolecular fiber	35	9.05387e-13	MEFV;ANKRD2;MYLK2;MYOZ2;DYNLRB2;KLHL41;KRT36;MYOM3;MYO18B;ACTN2;ACTA1;CASQ1;CAVIN4;MYPN;MYH7;ANKRD1;TNNI1;MYL2;NRAP;CSRP3;LMOD2;ABRA;SYNPO2L;MYOM1;ACKR2;TRIM54;MYOM2;C10orf71;TNNT1;RYR1;TTN;KRTAP21-1;MYH8;SMPX;MYOD1	flavone metabolic process	3	4.1121e-05	UGT1A1;UGT1A10;UGT1A8	cellular homeostasis	16	0.00279755	METTL21C;MT1A;SLC24A4;RHCG;CARTPT;PVALB;CCKBR;CALB2;ATP6V0A4;ATP6V0D2;KCNA5;NOS2;IL6;CD19;FOXA2;MT1M
Metharbital	3	0.00089771	GABRA1;GABRG2;GABRP	negative regulation of lyase activity	2	0.0150575	OPRM1;GALR2	xenobiotic catabolic process	2	0.00675586	UGT1A1;CYP1A1	supramolecular polymer	35	1.12643e-12	MEFV;ANKRD2;MYLK2;MYOZ2;DYNLRB2;KLHL41;KRT36;MYOM3;MYO18B;ACTN2;ACTA1;CASQ1;CAVIN4;MYPN;MYH7;ANKRD1;TNNI1;MYL2;NRAP;CSRP3;LMOD2;ABRA;SYNPO2L;MYOM1;ACKR2;TRIM54;MYOM2;C10orf71;TNNT1;RYR1;TTN;KRTAP21-1;MYH8;SMPX;MYOD1	Ethylmorphine	3	4.1121e-05	CYP3A4;CYP2B6;OPRM1	integral component of presynaptic membrane	4	0.00308401	OPRD1;GRM3;SLC6A5;NRXN1
Estazolam	3	0.00089771	GABRA1;GABRG2;GABRP	retina homeostasis	3	0.0169823	LCN1;CROCC;CST4	tonic smooth muscle contraction	2	0.00675586	AGT;NMU	supramolecular complex	35	1.16196e-12	MEFV;ANKRD2;MYLK2;MYOZ2;DYNLRB2;KLHL41;KRT36;MYOM3;MYO18B;ACTN2;ACTA1;CASQ1;CAVIN4;MYPN;MYH7;ANKRD1;TNNI1;MYL2;NRAP;CSRP3;LMOD2;ABRA;SYNPO2L;MYOM1;ACKR2;TRIM54;MYOM2;C10orf71;TNNT1;RYR1;TTN;KRTAP21-1;MYH8;SMPX;MYOD1	Solifenacin	3	4.1121e-05	CYP3A4;CHRM2;CHRM3	response to histamine	2	0.0033376	GABRG2;GABRA1
Clotiazepam	3	0.00089771	GABRA1;GABRG2;GABRP	cellular modified amino acid catabolic process	2	0.0175508	GGTLC2;GOT2	positive regulation of histone H3-K9 methylation	2	0.00675586	PRDM12;HIST1H1B	skeletal muscle tissue development	16	2.57261e-12	ANKRD2;MYLK2;MYOZ2;METTL21C;KLHL41;STAC3;ACTA1;CASQ1;VGLL2;SMYD1;ANKRD1;CSRP3;MYOM1;MYOM2;RYR1;MYOD1	Losartan	4	5.61806e-05	UGT1A1;CYP3A4;UGT1A10;SLC22A6	benzodiazepine receptor activity	2	0.0033376	GABRG2;GABRA1
Prazepam	3	0.00089771	GABRA1;GABRG2;GABRP	fibroblast growth factor receptor binding	2	0.0175508	FGF4;FGF3	positive regulation of cytolysis	2	0.00675586	PGLYRP4;PGLYRP1	skeletal muscle organ development	16	5.95612e-12	ANKRD2;MYLK2;MYOZ2;METTL21C;KLHL41;STAC3;ACTA1;CASQ1;VGLL2;SMYD1;ANKRD1;CSRP3;MYOM1;MYOM2;RYR1;MYOD1	Ketobemidone	4	5.61806e-05	CYP3A4;CYP2B6;OPRM1;GRIN2C	detection of chemical stimulus involved in sensory perception of smell	9	0.00338323	OR2T10;OR5M11;OR14I1;OR2T5;OR10G7;OR6K2;OR2T35;OR10H3;OR2AG1
natural killer cell differentiation involved in immune response	2	0.000912018	PGLYRP4;PGLYRP1	response to ethanol	4	0.0183209	BIRC2;OPRM1;GOT2;OPRK1	Codeine	2	0.00675586	UGT1A1;OPRD1	muscle fiber development	11	1.48817e-11	KLHL41;MYOM3;STAC3;MYO18B;ACTA1;MYL2;MYOM1;MYOM2;RYR1;TTN;MYOD1	eating behavior	5	6.03572e-05	IAPP;OPRM1;ATP8A2;TH;GHSR	olfactory receptor activity	9	0.00338323	OR2T10;OR5M11;OR14I1;OR2T5;OR10G7;OR6K2;OR2T35;OR10H3;OR2AG1
regulation of natural killer cell differentiation involved in immune response	2	0.000912018	PGLYRP4;PGLYRP1	epithelial structure maintenance	2	0.0188586	MUC6;CROCC	Warfarin	2	0.00675586	ORM1;CYP1A1	cardiac myofibril assembly	8	7.0203e-11	MYLK3;MYOM3;MYL2;NRAP;CSRP3;MYOM1;MYOM2;TTN	carboxylic acid binding	11	6.22158e-05	TDO2;DBH;UGT1A1;GLRA3;GLDC;UGT1A10;UGT1A8;FOLR3;FFAR4;TH;GRM7	pancreas development	4	0.00339176	MSLN;NEUROG3;IL6;FOXA2
peptidoglycan receptor activity	2	0.000912018	PGLYRP4;PGLYRP1	intermediate filament	5	0.018878	KRTAP13-2;KRT36;KRT78;KRTAP9-7;KRT28	Flunarizine	2	0.00675586	CYP1A1;CACNA1I	muscle filament sliding	9	7.751e-11	MYLK2;ACTN2;ACTA1;MYH7;TNNI1;MYL2;TNNT1;TTN;MYH8	Neuroactive ligand-receptor interaction	13	6.64412e-05	RXFP1;GLRA3;GRID2;GPR83;GHRHR;CHRM2;OPRM1;CHRM3;GRIN2C;CHRNA3;GHSR;GRM7;NMBR	cellular chemical homeostasis	14	0.0034061	METTL21C;MT1A;SLC24A4;RHCG;CARTPT;PVALB;CCKBR;CALB2;ATP6V0A4;ATP6V0D2;KCNA5;CD19;FOXA2;MT1M
Lormetazepam	2	0.000912018	GABRA1;GABRG2	detection of chemical stimulus involved in sensory perception	8	0.0190279	OR51G2;CST1;OR51B4;OR7G3;OR7C2;CST4;OR10W1;OR1A1	antimicrobial humoral immune response mediated by antimicrobial peptide	4	0.007397	PGLYRP4;SEMG1;RNASE6;PGLYRP1	actin-myosin filament sliding	9	7.751e-11	MYLK2;ACTN2;ACTA1;MYH7;TNNI1;MYL2;TNNT1;TTN;MYH8	behavior	20	7.00906e-05	DBH;SEZ6;IAPP;AGT;FEZF2;OTOG;NETO1;VIP;PRKCG;OBP2B;GHRHR;GRP;APH1B;OPRM1;ADAM2;ATP8A2;TH;CHRNA3;GHSR;GRM7	organic anion transport	10	0.00362047	LCN1;FABP4;HBA1;SLC16A12;NOS2;SLC6A5;MFSD2A;CA3;SYT4;APOA2
serine hydrolase activity	8	0.00096173	KLK14;MMP13;PRSS1;HPR;PROC;PRSS50;TMPRSS11A;TMPRSS6	response to ammonium ion	4	0.019277	OPRM1;GOT2;LY6H;OPRK1	acrosome reaction	3	0.00747691	SPINK1;ZP2;SPESP1	structural constituent of muscle	9	2.49066e-10	ANKRD2;MYOM3;ACTN2;MYL2;CSRP3;MYOM1;MYOM2;TTN;MYH8	Ipratropium	3	7.12757e-05	CYP3A4;CHRM2;CHRM3	molecular transducer activity	22	0.0037043	OPRD1;GABRG2;CD247;OR2T10;IL22RA2;OR5M11;GRM3;OR14I1;CD79A;GPRC6A;OR2T5;TNFRSF17;CCKBR;OR10G7;GABRA1;OR6K2;OR2T35;NRXN1;CD69;OR10H3;OR2AG1;ACKR1
Amoxapine	4	0.0010046	ORM1;GABRA1;GABRG2;GABRP	receptor regulator activity	9	0.020166	FGF4;IL12A;FGF3;COLEC10;IFNA6;CCL16;APLN;LY6H;GALP	oxygen binding	3	0.00747691	TDO2;CYP1A1;HBQ1	striated muscle thin filament	8	2.54726e-10	MYOM3;ACTA1;TNNI1;LMOD2;MYOM1;MYOM2;TNNT1;TTN	Darifenacin	3	7.12757e-05	CYP3A4;CHRM2;CHRM3	cellular response to metal ion	6	0.00377528	AQP2;MT1A;FABP4;FOSB;SYT4;MT1M
Etomidate	3	0.00103991	GABRA1;GABRG2;GABRP	calmodulin-dependent protein kinase activity	2	0.0202061	MYLK3;MYLK2	Phenobarbital	3	0.00747691	UGT1A1;CYP1A1;GABRA1	myofilament	8	3.4059e-10	MYOM3;ACTA1;TNNI1;LMOD2;MYOM1;MYOM2;TNNT1;TTN	Oxybutynin	3	7.12757e-05	CYP3A4;CHRM2;CHRM3	peptide hormone secretion	7	0.00378673	MAFA;CARTPT;KCNA5;NOS2;IL6;FOXA2;FGA
Eszopiclone	3	0.00103991	GABRA1;GABRG2;GABRP	Ketamine	2	0.0202061	OPRM1;OPRK1	protein complex oligomerization	13	0.00789688	IGHMBP2;RS1;OPRD1;GLRA3;TDO2;SEMG2;SEMG1;PCBD2;TCL1A;ITLN1;KRT1;HBQ1;KCNC2	actin binding	21	4.5055e-10	MEFV;MYOZ2;SPTA1;MYOM3;MYO18B;ACTN2;MISP;MYPN;MYH7;CROCC;TNNI1;MYL2;NRAP;CSRP3;LMOD2;ABRA;SYNPO2L;MYOM1;MYOM2;TTN;MYH8	Pilocarpine	3	7.12757e-05	CYP3A4;CHRM2;CHRM3	response to inorganic substance	11	0.0039458	AQP2;MT1A;FABP4;HBA1;OTC;KCNA5;IL6;FOSB;FGA;SYT4;MT1M
regulation of interleukin-13 production	3	0.00119559	IRF4;SCGB1A1;PAEP	Focal adhesion	5	0.0204102	MYLK3;BIRC2;LAMA1;MYLK2;COL2A1	positive regulation of killing of cells of other organism	2	0.00804599	PGLYRP4;PGLYRP1	cardiac muscle tissue development	15	6.9987e-10	MYLK2;MYLK3;BMPR2;MYOM3;MYO18B;ACTN2;MYH7;ANKRD1;TNNI1;MYL2;NRAP;CSRP3;MYOM1;MYOM2;TTN	Levomethadyl Acetate	3	7.12757e-05	CYP3A4;OPRM1;CHRNA3	insemination	2	0.00398415	SEMG1;KLK14
natural killer cell differentiation	3	0.00119559	PGLYRP4;HNF1A;PGLYRP1	trans-synaptic signaling	11	0.0206966	PCDH17;DAGLA;OPRM1;MYLK2;LRRTM2;CPLX2;BAIAP3;SHISA8;OPRK1;HTR3B;STAC3	detection of bacterium	2	0.00804599	PGLYRP4;PGLYRP1	cardiac muscle cell development	10	2.3255e-09	MYLK3;MYOM3;MYO18B;ACTN2;MYL2;NRAP;CSRP3;MYOM1;MYOM2;TTN	sensory perception of smell	16	7.49187e-05	OR4A5;OR5J2;OBP2B;OR6K6;OR56B4;OR51G2;OR7G3;OR10W1;OR52H1;OR1J4;OR5C1;OR14A16;OR5K4;OBP2A;OR5T2;OR9Q2	negative regulation of bone resorption	2	0.00398415	CARTPT;IL6
GABA receptor activity	3	0.00119559	GABRA1;GABRG2;GABRP	cardiac muscle tissue development	5	0.0208056	FGF3;MYLK3;MYLK2;ADAMTS9;BMPR2	gastro-intestinal system smooth muscle contraction	2	0.00804599	HTR1D;NMU	A band	8	2.49162e-09	KLHL41;MYOM3;MYL2;LMOD2;MYOM1;MYOM2;TTN;SMPX	Olfactory transduction	17	7.55696e-05	CALML5;OR4A5;OR5J2;OR6K6;OR56B4;OR4N4;OR51G2;OR7G3;OR10W1;PRKACG;OR52H1;OR1J4;OR5C1;OR14A16;OR5K4;OR5T2;OR9Q2	T-helper 17 cell lineage commitment	2	0.00398415	IRF4;IL6
Clonazepam	3	0.00119559	GABRA1;GABRG2;GABRP	response to anesthetic	3	0.0211591	OPRM1;GOT2;OPRK1	transmembrane transporter activity	21	0.00911329	ABCB7;SV2B;GC;SLC3A1;GLRA3;UCP1;ATP12A;ABCC12;AQP10;GJA3;SLC44A5;RHBG;GRID2;CACNA2D2;CACNA1I;TMC1;OTOP3;SLC16A14;GABRA1;SLC22A16;KCNC2	cardiac cell development	10	4.39506e-09	MYLK3;MYOM3;MYO18B;ACTN2;MYL2;NRAP;CSRP3;MYOM1;MYOM2;TTN	transmembrane signaling receptor activity	32	8.82684e-05	ADGRG7;RXFP1;GLRA3;OR4A5;GRID2;REG4;OR5J2;UNC5A;GPR83;TAS2R43;FFAR4;GHRHR;OR6K6;OR56B4;OR51G2;CHRM2;OR7G3;OPRM1;CHRM3;OR10W1;GRIN2C;OR52H1;OR1J4;OR5C1;OR14A16;OR5K4;OR5T2;CHRNA3;GHSR;GRM7;NMBR;OR9Q2	titin binding	2	0.00398415	ANKRD2;ANKRD1
Nitrazepam	3	0.00119559	GABRA1;GABRG2;GABRP	potassium ion transmembrane transport	5	0.0216113	FXYD4;GALR2;KCNRG;OPRK1;HCN1	low-density lipoprotein particle remodeling	2	0.00943737	AGT;PLA2G2A	muscle alpha-actinin binding	6	4.68927e-09	MYOM3;MYPN;NRAP;MYOM1;MYOM2;TTN	cellular glucuronidation	4	8.9657e-05	UGT1A1;UGT1A10;UGT1A8;UGT2B11	dendrite membrane	3	0.00399641	OPRD1;GABRG2;GABRA1
homophilic cell adhesion via plasma membrane adhesion molecules	7	0.00125816	PCDHA10;PCDHA6;PCDHA4;PCDHGB5;PCDHA8;PCDHA11;PCDHA12	cellular response to fibroblast growth factor stimulus	4	0.0218006	FGF4;FGF3;LRIT3;APLN	response to light intensity	2	0.00943737	RS1;KCNC2	M band	7	5.76387e-09	KLHL41;MYOM3;LMOD2;MYOM1;MYOM2;TTN;SMPX	Phenytoin	4	8.9657e-05	UGT1A1;CYP3A4;CYP2B6;CYP11B1	regulation of peptide secretion	10	0.00415469	PAEP;CARTPT;ANKRD1;KCNA5;NOS2;IL6;FOXA2;FGA;SYT4;APOA2
chloride channel complex	4	0.00127534	GABRA1;GABRG2;GABRP;GLRA3	striated muscle tissue development	7	0.0226545	FGF3;MYLK3;MYLK2;ADAMTS9;MYOZ2;BMPR2;STAC3	homocysteine metabolic process	2	0.00943737	CPS1;DPEP1	cardiac muscle tissue morphogenesis	9	1.42725e-08	MYLK2;MYOM3;MYH7;ANKRD1;TNNI1;MYL2;MYOM1;MYOM2;TTN	organic acid binding	11	0.000100254	TDO2;DBH;UGT1A1;GLRA3;GLDC;UGT1A10;UGT1A8;FOLR3;FFAR4;TH;GRM7	positive regulation of inflammatory response	5	0.00420952	FABP4;LBP;IL21;C2CD4B;IL6
cell-cell adhesion via plasma-membrane adhesion molecules	9	0.00128603	PCDHA10;CLDN2;PCDHA6;PCDHA4;PCDHGB5;PCDHA8;PCDHA11;CLDN9;PCDHA12	regulation of fibroblast growth factor receptor signaling pathway	2	0.0230177	LRIT3;APLN	detection of other organism	2	0.00943737	PGLYRP4;PGLYRP1	actin cytoskeleton	20	2.93581e-08	MYLK3;MYOZ2;SPTA1;MYOM3;MYO18B;ACTN2;ACTA1;MYH7;CROCC;TNNI1;MYL2;LMOD2;ABRA;SYNPO2L;MYOM1;ACKR2;MYOM2;TNNT1;TTN;MYH8	regulation of signaling receptor activity	19	0.000101999	AMBN;FGF3;IAPP;FGF4;AGT;FGF22;NETO1;CACNG3;GPHA2;VIP;IFNK;UTS2B;CHGB;PPY;GRP;OPRM1;IL25;IFNA8;BMP5	defense response to Gram-negative bacterium	4	0.00425114	LBP;NOS2;IL6;S100A7
negative regulation of response to wounding	5	0.0013317	KRT1;VTN;FGG;PROC;TMPRSS6	Dextromethorphan	2	0.0230177	OPRM1;OPRK1	peptidoglycan muralytic activity	2	0.00943737	PGLYRP4;PGLYRP1	heart development	21	3.46321e-08	MYLK2;MYLK3;BMPR2;CRIP1;MYOM3;MYO18B;ACTN2;MYH7;SMYD1;ANKRD1;TNNI1;MYL2;APLN;NRAP;CSRP3;GPC3;SYNPO2L;MYOM1;MYOM2;RYR1;TTN	Mycophenolate mofetil	4	0.000110941	UGT1A1;CYP3A4;UGT1A10;UGT1A8	ion transport	23	0.00450068	OPRD1;GABRG2;SEMG1;CALHM3;METTL21C;LCN1;FABP4;SLC24A4;HBA1;RHCG;SLC16A12;GABRA1;ATP6V0A4;ATP6V0D2;KCNA5;NOS2;CD19;SLC6A5;MFSD2A;CA3;SYT4;ATP1B4;APOA2
peptidoglycan metabolic process	2	0.00135933	PGLYRP4;PGLYRP1	enzyme inhibitor activity	7	0.0238929	PPP1R17;BIRC2;LCN1;CST1;HEXIM2;CST4;BIRC5	Cholecalciferol	2	0.00943737	GC;CYP1A1	striated muscle contraction	12	3.76031e-08	MYLK2;KLHL41;STAC3;CASQ1;MYH7;TNNI1;MYL2;CSRP3;TNNT1;TTN;MYH8;SMPX	Fesoterodine	3	0.000112955	CYP3A4;CHRM2;CHRM3	response to copper ion	3	0.00458986	AQP2;MT1A;MT1M
peptidoglycan catabolic process	2	0.00135933	PGLYRP4;PGLYRP1	integral component of plasma membrane	20	0.0245262	PCDH17;FXYD4;APH1B;BIRC2;TPBG;DAGLA;OPRM1;KIR3DL1;LRRTM2;RXFP2;GALR2;GPR101;BRS3;SHISA8;OPRK1;HTR3B;BMPR2;OPN1MW3;C6;HCN1	Tramadol	2	0.00943737	UGT1A1;OPRD1	cytoskeletal protein binding	28	5.7308e-08	MEFV;ANKRD2;MYLK2;MYOZ2;AMPD1;SPTA1;MYOM3;MYO18B;ACTN2;MISP;ACTA1;MYPN;MYH7;CROCC;ANKRD1;TNNI1;MYL2;NRAP;CSRP3;LMOD2;ABRA;SYNPO2L;MYOM1;TRIM54;MYOM2;TNNT1;TTN;MYH8	Imidafenacin	3	0.000112955	CYP3A4;CHRM2;CHRM3	regulation of protein oligomerization	3	0.00458986	OPRD1;JCHAIN;TCL1A
neuronal dense core vesicle	2	0.00135933	OPRD1;SYT4	adult behavior	4	0.0250843	PCDH17;OPRM1;BRS3;OPRK1	Naloxone	2	0.00943737	UGT1A1;OPRD1	muscle tissue morphogenesis	9	6.09843e-08	MYLK2;MYOM3;MYH7;ANKRD1;TNNI1;MYL2;MYOM1;MYOM2;TTN	Steroid hormone biosynthesis	6	0.000120642	UGT1A1;CYP3A4;UGT1A10;UGT1A8;UGT2B11;CYP11B1	regulation of granulocyte chemotaxis	3	0.00458986	LBP;S100A7;S100A14
vitamin D binding	2	0.00135933	GC;IRX5	retina development in camera-type eye	4	0.0250843	ATOH7;LAMA1;BMPR2;HCN1	Topiroxostat	2	0.00943737	ORM1;CYP1A1	actin filament-based process	24	6.39014e-08	MYLK2;MYLK3;MYOZ2;KLHL41;SPTA1;MYOM3;ACTN2;ACTA1;CASQ1;MYPN;MYH7;ANKRD1;TNNI1;MYL2;NRAP;CSRP3;WNT4;LMOD2;SYNPO2L;MYOM1;MYOM2;TNNT1;TTN;MYH8	receptor ligand activity	17	0.000128097	AMBN;FGF3;IAPP;FGF4;AGT;FGF22;COLEC10;GPHA2;VIP;IFNK;UTS2B;CHGB;PPY;GRP;IL25;IFNA8;BMP5	positive regulation of leukocyte chemotaxis	4	0.00463249	LBP;IL6;S100A7;S100A14
Desflurane	3	0.00136521	GABRA1;GABRG2;GABRP	response to fibroblast growth factor	4	0.025659	FGF4;FGF3;LRIT3;APLN	monocarboxylic acid binding	4	0.00949857	UGT1A1;UGT2B17;UCP1;UGT1A8	actinin binding	7	6.86318e-08	MYOM3;MYPN;NRAP;CSRP3;MYOM1;MYOM2;TTN	receptor regulator activity	18	0.000128405	DKK4;AMBN;FGF3;IAPP;FGF4;AGT;FGF22;COLEC10;GPHA2;VIP;IFNK;UTS2B;CHGB;PPY;GRP;IL25;IFNA8;BMP5	cellular response to lipopolysaccharide	6	0.00463724	LBP;AICDA;ANKRD1;NOS2;IL6;CXCL2
Bromazepam	3	0.00136521	GABRA1;GABRG2;GABRP	peptidase regulator activity	5	0.0259445	BIRC2;LCN1;CST1;CST4;BIRC5	antibacterial humoral response	3	0.0100961	SEMG2;SEMG1;RNASE6	cardiac muscle cell differentiation	10	9.46407e-08	MYLK3;MYOM3;MYO18B;ACTN2;MYL2;NRAP;CSRP3;MYOM1;MYOM2;TTN	xenobiotic metabolic process	8	0.000130327	UGT1A1;CYP3A4;UGT1A10;UGT1A8;DPEP1;CYP2B6;UGT2B11;CES3	collecting duct development	2	0.00468391	AQP2;WNT9B
Quazepam	3	0.00136521	GABRA1;GABRG2;GABRP	negative regulation of blood circulation	2	0.0259803	APLN;BMPR2	cytolysis	3	0.0108237	PGLYRP4;PGLYRP1;HMHB1	muscle organ morphogenesis	9	1.15237e-07	MYLK2;MYOM3;MYH7;ANKRD1;TNNI1;MYL2;MYOM1;MYOM2;TTN	neurotransmitter receptor activity	8	0.000130327	GLRA3;GRID2;CHRM2;OPRM1;CHRM3;GRIN2C;OR5T2;CHRNA3	regulation of respiratory burst	2	0.00468391	LBP;JCHAIN
Stiripentol	3	0.00136521	GABRA1;GABRG2;GABRP	spinal cord motor neuron differentiation	2	0.0259803	OLIG2;MDGA2	dendrite membrane	3	0.0108237	OPRD1;GABRA1;KCNC2	skeletal muscle thin filament assembly	5	1.29558e-07	MYOM3;ACTA1;MYOM1;MYOM2;TTN	Enasidenib	4	0.000135663	UGT1A1;CYP3A4;CYP2B6;SLC22A6	regulation of myoblast proliferation	2	0.00468391	ANKRD2;KCNA5
transmembrane signaling receptor activity	23	0.0014699	OPRD1;OR2T10;CR2;GABRA1;GRM3;CD79A;CD247;GABRG2;GABRP;GRM7;GLRA3;UNC5CL;CNR2;HTR1D;XCR1;SOSTDC1;GPR87;OR5M11;OR14I1;OR7D2;IL22RA2;CXCR5;OR4K2	single fertilization	4	0.0262416	TNP2;TEX101;ZAN;CCDC87	Tryptophan metabolism	3	0.0108237	TDO2;CYP1A1;AOC1	supramolecular fiber organization	22	1.58249e-07	MYLK3;MYOZ2;TRDN;KLHL41;SPTA1;MYOM3;ACTN2;ACTA1;CASQ1;MYPN;ANKRD1;MYL2;NRAP;CSRP3;WNT4;LMOD2;SYNPO2L;MYOM1;TRIM54;MYOM2;TNNT1;TTN	Cinnarizine	4	0.00016414	CACNA1I;CYP2B6;CHRM2;CHRM3	L-Citrulline	2	0.00468391	OTC;NOS2
regulation of cyclase activity	4	0.00148184	GRM3;GRM7;GPR87;NOS2	positive regulation of cell division	3	0.02668	FGF4;FGF3;OPN1MW3	basic amino acid transport	2	0.0109275	SLC3A1;AGT	skeletal muscle adaptation	6	1.59084e-07	MYOZ2;ACTA1;MYH7;TNNI1;TNNT1;MYOD1	flavonoid glucuronidation	3	0.000167819	UGT1A1;UGT1A10;UGT1A8	Zolpidem	2	0.00468391	GABRG2;GABRA1
regulation of wound healing	6	0.00153957	FOXA2;KRT1;VTN;FGG;PROC;TMPRSS6	muscle tissue development	7	0.0271915	FGF3;MYLK3;MYLK2;ADAMTS9;MYOZ2;BMPR2;STAC3	regulation of natural killer cell differentiation	2	0.0109275	PGLYRP4;PGLYRP1	skeletal myofibril assembly	5	2.78391e-07	MYOM3;ACTA1;MYOM1;MYOM2;TTN	Tolterodine	3	0.000167819	CYP3A4;CHRM2;CHRM3	inorganic ion homeostasis	13	0.00477476	METTL21C;MT1A;SLC24A4;RHCG;PVALB;CCKBR;CALB2;ATP6V0A4;ATP6V0D2;KCNA5;CD19;S100A14;MT1M
interleukin-13 production	3	0.00154921	IRF4;SCGB1A1;PAEP	detection of stimulus	10	0.0273352	OR51G2;CST1;OR51B4;OR7G3;OR7C2;CST4;OR10W1;UGT2A1;OPN1MW3;OR1A1	Thalidomide	2	0.0109275	ORM1;CYP1A1	alpha-actinin binding	6	3.83553e-07	MYOM3;MYPN;NRAP;MYOM1;MYOM2;TTN	Tiotropium	3	0.000167819	CYP3A4;CHRM2;CHRM3	I band	5	0.00477574	ANKRD2;ANKRD1;KCNA5;C10orf71;SYNPO2L
uronic acid metabolic process	3	0.00154921	UGT2B17;UGT1A8;UGT2B7	eating behavior	2	0.0275164	OPRM1;OPRK1	response to copper ion	3	0.012368	MT1HL1;CYP1A1;AOC1	cardiac muscle fiber development	5	5.37811e-07	MYOM3;MYO18B;MYOM1;MYOM2;TTN	Naldemedine	3	0.000167819	CYP3A4;ABCB5;OPRM1	protein secretion	11	0.00477894	PAEP;MAFA;CARTPT;ANKRD1;KCNA5;NOS2;IL6;FOXA2;FGA;SYT4;APOA2
glucuronate metabolic process	3	0.00154921	UGT2B17;UGT1A8;UGT2B7	Apoptosis	2	0.0275164	BIRC2;BIRC5	retinoid binding	3	0.012368	UGT1A1;UGT2B17;UGT1A8	cardiocyte differentiation	10	8.89945e-07	MYLK3;MYOM3;MYO18B;ACTN2;MYL2;NRAP;CSRP3;MYOM1;MYOM2;TTN	Delafloxacin	3	0.000167819	UGT1A1;CYP3A4;ABCB5	cellular ion homeostasis	12	0.00478056	METTL21C;MT1A;SLC24A4;RHCG;PVALB;CCKBR;CALB2;ATP6V0A4;ATP6V0D2;KCNA5;CD19;MT1M
Topiramate	3	0.00154921	GABRA1;GABRG2;GABRP	adenylate cyclase-modulating G protein-coupled receptor signaling pathway	5	0.0278227	OPRM1;RXFP2;GALR2;GPR101;OPRK1	hepatocyte differentiation	2	0.012514	CPS1;CYP1A1	actin-mediated cell contraction	9	9.59537e-07	MYLK2;ACTN2;ACTA1;MYH7;TNNI1;MYL2;TNNT1;TTN;MYH8	signaling receptor activity	35	0.000179105	ADGRG7;RXFP1;GLRA3;OR4A5;GRID2;REG4;OR5J2;FOLR3;UNC5A;GPR83;TAS2R43;FFAR4;GHRHR;OR6K6;OR56B4;OR51G2;TNFRSF13B;CHRM2;OR7G3;OPRM1;CHRM3;OR10W1;GRIN2C;OR52H1;OR1J4;OR5C1;OR14A16;OR5K4;OR5T2;CD244;CHRNA3;GHSR;GRM7;NMBR;OR9Q2	detection of stimulus	12	0.00490058	OR2T10;GNGT1;LBP;OR5M11;OR14I1;OR2T5;OR10G7;OR6K2;OR2T35;FOXA2;OR10H3;OR2AG1
Clobazam	3	0.00154921	GABRA1;GABRG2;GABRP	tissue homeostasis	5	0.0283054	LCN1;MUC6;CROCC;COL2A1;CST4	regulation of killing of cells of other organism	2	0.012514	PGLYRP4;PGLYRP1	sarcoplasmic reticulum membrane	6	1.59696e-06	TRDN;KLHL41;CASQ1;DHRS7C;SLN;RYR1	sensory perception of taste	6	0.000188658	CST1;CST4;CST2;TAS2R43;FFAR4;CA6	CD4-positive, alpha-beta T cell activation	4	0.00503623	IRF4;FUT7;TARM1;IL6
Flurazepam	3	0.00154921	GABRA1;GABRG2;GABRP	neuromuscular synaptic transmission	2	0.0290883	MYLK2;STAC3	Ino80 complex	2	0.012514	INO80E;ACTR8	actin cytoskeleton organization	20	1.87297e-06	MYLK3;MYOZ2;KLHL41;SPTA1;MYOM3;ACTN2;ACTA1;CASQ1;MYPN;ANKRD1;MYL2;NRAP;CSRP3;WNT4;LMOD2;SYNPO2L;MYOM1;MYOM2;TNNT1;TTN	sensory perception of bitter taste	5	0.000220433	CST1;CST4;CST2;TAS2R43;CA6	Salmonella infection	4	0.00503623	LBP;NOS2;IL6;CXCL2
negative regulation of multicellular organismal process	22	0.00158171	ORM1;FOXA2;AHSG;PGLYRP4;CARTPT;KRT1;PAX6;APOA2;SEMA3A;SCGB1A1;VTN;ASCL2;NMU;GFAP;SOSTDC1;FGG;TRAIP;PROC;SYT4;PGLYRP1;PAEP;TMPRSS6	keratinization	5	0.0292868	KRTAP13-2;KRT36;KRT78;KRTAP9-7;KRT28	DNA helicase complex	2	0.012514	INO80E;ACTR8	skeletal muscle myosin thick filament assembly	4	2.36466e-06	MYOM3;MYOM1;MYOM2;TTN	Retinol metabolism	6	0.000223106	UGT1A1;CYP3A4;UGT1A10;UGT1A8;CYP2B6;UGT2B11	detoxification of copper ion	2	0.00543599	MT1A;MT1M
Enflurane	3	0.00174803	GABRA1;GABRG2;GABRP	cell body	9	0.0297921	OPRM1;UNC5A;CPLX2;LRIT3;GOT2;BRS3;OPRK1;NGB;BMPR2	axolemma	2	0.012514	CNTNAP2;KCNC2	striated muscle myosin thick filament assembly	4	2.36466e-06	MYOM3;MYOM1;MYOM2;TTN	anterograde trans-synaptic signaling	21	0.000225808	DBH;RAPGEF2;SEZ6;GLRA3;AGT;NETO1;CACNG3;GRID2;CPLX2;PRKCG;CHRM2;OPRM1;CHRM3;GRIN2C;TH;OR5T2;CHRNA3;SCGN;GHSR;SLC17A6;GRM7	stress response to copper ion	2	0.00543599	MT1A;MT1M
Temazepam	3	0.00174803	GABRA1;GABRG2;GABRP	acrosome reaction	2	0.0306953	TNP2;CCDC87	glycine binding	2	0.012514	GLRA3;GLDC	sarcoplasmic reticulum	7	3.4401e-06	TRDN;KLHL41;CASQ1;DHRS7C;FSD2;SLN;RYR1	uronic acid metabolic process	4	0.000233657	UGT1A1;UGT1A10;UGT1A8;UGT2B11	negative regulation of bone remodeling	2	0.00543599	CARTPT;IL6
Acamprosate	3	0.00174803	GABRA1;GABRG2;GABRP	cellular zinc ion homeostasis	2	0.0306953	MT4;SLC30A8	Prazosin	2	0.012514	ORM1;CYP1A1	myosin filament assembly	4	3.52097e-06	MYOM3;MYOM1;MYOM2;TTN	glucuronate metabolic process	4	0.000233657	UGT1A1;UGT1A10;UGT1A8;UGT2B11	cellular response to molecule of bacterial origin	6	0.00550351	LBP;AICDA;ANKRD1;NOS2;IL6;CXCL2
Triazolam	3	0.00174803	GABRA1;GABRG2;GABRP	chemoattractant activity	2	0.0306953	COLEC10;CCL16	Propranolol	2	0.012514	ORM1;CYP1A1	regulation of ion transmembrane transport	16	4.3642e-06	FXYD4;TRDN;METTL21C;KCNRG;KCNA7;HCN1;STAC3;ACTN2;EPO;GALR2;CASQ1;SHISA8;DHRS7C;SLN;SCN4A;OPRK1	Nicardipine	4	0.000233657	CYP3A4;CYP2B6;CHRM2;CHRM3	endocrine pancreas development	3	0.00557526	NEUROG3;IL6;FOXA2
negative regulation of cell activation	7	0.00180971	PGLYRP4;CNR2;TNFAIP8L2;SCGB1A1;VTCN1;FGG;PGLYRP1	receptor ligand activity	8	0.0313916	FGF4;IL12A;FGF3;COLEC10;IFNA6;CCL16;APLN;GALP	Isopropyl Alcohol	2	0.012514	PLA2G2A;PRSS2	actin filament-based movement	9	4.39426e-06	MYLK2;ACTN2;ACTA1;MYH7;TNNI1;MYL2;TNNT1;TTN;MYH8	Raloxifene	3	0.00023746	UGT1A1;CYP3A4;CYP2B6	serine-type peptidase activity	6	0.00604874	KLK14;GZMA;HPR;RBP3;KLK13;PRSS1
regulation of Schwann cell proliferation	2	0.00189096	ASCL2;GFAP	camera-type eye development	6	0.0319658	ATOH7;CRYGD;LAMA1;LIM2;BMPR2;HCN1	endopeptidase inhibitor activity	6	0.0128459	SPINK1;AGT;SERPIND1;SERPINA4;AHSG;DPEP1	heart morphogenesis	12	4.47839e-06	MYLK2;BMPR2;MYOM3;MYH7;ANKRD1;TNNI1;MYL2;SYNPO2L;MYOM1;MYOM2;RYR1;TTN	Propiverine	3	0.00023746	CYP3A4;CHRM2;CHRM3	neuron cell-cell adhesion	2	0.00623953	NCAM2;NRXN1
immunoglobulin complex	2	0.00189096	IGLL5;CD79A	Hippo signaling pathway	4	0.0331757	BIRC2;CTNNA3;BIRC5;BMPR2	anterograde trans-synaptic signaling	15	0.0130172	SV2B;CDC20;AGT;GLRA3;GRM7;OMP;HTR1D;DLGAP1;RAPGEF2;NMU;GRID2;CACNA2D2;GRM3;CHAT;GABRA1	myosin filament organization	4	5.04855e-06	MYOM3;MYOM1;MYOM2;TTN	Acetaminophen	4	0.000275364	UGT1A1;CYP3A4;UGT1A10;SLC22A6	detoxification of inorganic compound	2	0.00623953	MT1A;MT1M
Picrotoxin	2	0.00189096	GABRA1;GLRA3	glutamate receptor signaling pathway	3	0.0338412	DAGLA;OPRM1;SHISA8	hormone metabolic process	7	0.013233	TG;UGT1A1;CGA;UGT1A8;CYP1A1;CHAT;UGT2B11	striated muscle adaptation	6	5.60043e-06	MYOZ2;ACTA1;MYH7;TNNI1;TNNT1;MYOD1	Trimebutine	4	0.000275364	CACNA1I;CHRM2;OPRM1;CHRM3	positive regulation of interleukin-13 production	2	0.00623953	PAEP;IRF4
Ginkgo biloba	2	0.00189096	GABRA1;GABRG2	zinc ion homeostasis	2	0.034012	MT4;SLC30A8	glycosaminoglycan binding	7	0.013541	PGLYRP4;SERPIND1;PGLYRP1;EPYC;REG4;HABP2;AOC1	myotube differentiation	8	5.77796e-06	ANKRD2;KLHL41;STAC3;ACTA1;SMYD1;TRIM72;RYR1;MYOD1	fibroblast growth factor receptor binding	4	0.000322156	FGF3;FGF4;FGF22;KLB	Palmitic Acid	2	0.00623953	PAEP;FABP4
Maturity onset diabetes of the young	3	0.00196208	FOXA2;PAX6;HNF1A	axoneme part	2	0.034012	DNAI2;SAXO2	response to amine	3	0.0140321	CPS1;GLDC;KCNC2	regulation of cation transmembrane transport	13	6.05661e-06	FXYD4;TRDN;METTL21C;KCNRG;STAC3;ACTN2;EPO;GALR2;CASQ1;SHISA8;DHRS7C;SLN;OPRK1	Codeine	3	0.000323403	UGT1A1;CYP3A4;OPRM1	fatty acid transport	4	0.00638741	LCN1;FABP4;NOS2;MFSD2A
external side of plasma membrane	9	0.00204846	IGLL5;CD79A;CD19;VTCN1;FCER2;XCR1;FGG;MS4A1;CXCR5	detection of stimulus involved in sensory perception	8	0.0349114	OR51G2;CST1;OR51B4;OR7G3;OR7C2;CST4;OR10W1;OR1A1	isoprenoid binding	3	0.0140321	UGT1A1;UGT2B17;UGT1A8	release of sequestered calcium ion into cytosol by endoplasmic reticulum	5	6.85515e-06	TRDN;METTL21C;CASQ1;DHRS7C;RYR1	Efavirenz	3	0.000323403	UGT1A1;CYP3A4;CYP2B6	divalent inorganic cation homeostasis	10	0.00648774	METTL21C;MT1A;SLC24A4;PVALB;CCKBR;CALB2;KCNA5;CD19;S100A14;MT1M
regulation of fertilization	3	0.00219176	SPINK1;ZP2;PAEP	binding of sperm to zona pellucida	2	0.0357204	TEX101;ZAN	positive regulation of macrophage derived foam cell differentiation	2	0.0141944	AGT;PLA2G2A	sarcoplasm	7	7.94886e-06	TRDN;KLHL41;CASQ1;DHRS7C;FSD2;SLN;RYR1	endopeptidase inhibitor activity	9	0.000324207	CST1;WFDC5;CST4;AGT;DPEP1;CST2;SMR3A;WFDC12;SERPIND1	serine hydrolase activity	6	0.00663239	KLK14;GZMA;HPR;RBP3;KLK13;PRSS1
fibrinolysis	3	0.00219176	KRT1;FGG;TMPRSS6	intermediate filament cytoskeleton	5	0.0361898	KRTAP13-2;KRT36;KRT78;KRTAP9-7;KRT28	cellular response to nitric oxide	2	0.0141944	DPEP1;KCNC2	regulation of transmembrane transport	17	8.82203e-06	FXYD4;TRDN;METTL21C;KCNRG;KCNA7;HCN1;STAC3;ACTN2;EPO;GALR2;CASQ1;SHISA8;DHRS7C;GPC3;SLN;SCN4A;OPRK1	neuropeptide signaling pathway	7	0.000333443	RAPGEF2;GLRA3;ECEL1;GPR83;PPY;GRP;OPRM1	IL-17 signaling pathway	4	0.00663375	IL6;FOSB;S100A7;CXCL2
Ascorbate and aldarate metabolism	3	0.00219176	UGT2B17;UGT1A8;UGT2B7	negative regulation of endopeptidase activity	5	0.0367589	BIRC2;LCN1;CST1;CST4;BIRC5	modified amino acid transmembrane transporter activity	2	0.0141944	SLC3A1;SLC22A16	skeletal muscle fiber development	5	9.66004e-06	KLHL41;STAC3;ACTA1;RYR1;MYOD1	Ascorbate and aldarate metabolism	4	0.000374381	UGT1A1;UGT1A10;UGT1A8;UGT2B11	cellular response to inorganic substance	6	0.00678448	AQP2;MT1A;FABP4;FOSB;SYT4;MT1M
Primidone	3	0.00219176	GABRA1;GABRG2;GABRP	positive regulation of neurotransmitter transport	2	0.0374614	BAIAP3;APLN	inhibitory extracellular ligand-gated ion channel activity	2	0.0141944	GLRA3;GABRA1	metal ion transport	22	1.38501e-05	FXYD4;TRDN;METTL21C;KCNRG;KCNA7;HCN1;STAC3;ACTN2;EPO;GALR2;CASQ1;DHRS7C;CAMK2A;ASIC5;SLN;GRIN3A;SCN4A;SLC30A8;OPRK1;RYR1;SLC34A3;SLC17A8	Ketoconazole	4	0.000374381	UGT1A1;CYP3A4;CYP2B6;CYP11B1	response to glucocorticoid	5	0.00698885	METTL21C;NPAS4;IL6;FOSB;APOA2
Sevoflurane	3	0.00219176	GABRA1;GABRG2;GABRP	detection of chemical stimulus involved in sensory perception of bitter taste	2	0.0374614	CST1;CST4	peptidoglycan binding	2	0.0141944	PGLYRP4;PGLYRP1	myotube cell development	5	1.54631e-05	KLHL41;STAC3;ACTA1;RYR1;MYOD1	regulation of hormone levels	17	0.000400736	UGT1A1;AGT;CYP3A4;UGT1A8;VIP;FFAR4;GHRHR;UGT2B11;DHRS2;GRP;CYP11B1;KCNC2;CHRNA3;GHSR;BMP5;PDX1;SLC2A2	Neuroactive ligand-receptor interaction	7	0.00700346	OPRD1;GABRG2;GZMA;GRM3;CCKBR;GABRA1;PRSS1
negative regulation of defense response	7	0.00231686	KRT1;CXCL17;CNR2;TNFAIP8L2;PROC;PGLYRP1;IL22RA2	sarcoplasmic reticulum membrane	2	0.0374614	TRDN;ART1	trans-synaptic signaling	15	0.01433	SV2B;CDC20;AGT;GLRA3;GRM7;OMP;HTR1D;DLGAP1;RAPGEF2;NMU;GRID2;CACNA2D2;GRM3;CHAT;GABRA1	inorganic cation transmembrane transport	20	1.55382e-05	FXYD4;TRDN;METTL21C;KCNRG;KCNA7;HCN1;STAC3;ACTN2;GALR2;CASQ1;DHRS7C;ASIC5;COX6A2;SLN;GRIN3A;SCN4A;SLC30A8;OPRK1;RYR1;SLC34A3	detection of chemical stimulus involved in sensory perception of smell	14	0.000404375	OR4A5;OR5J2;OR6K6;OR56B4;OR51G2;OR7G3;OR10W1;OR52H1;OR1J4;OR5C1;OR14A16;OR5K4;OR5T2;OR9Q2	stress response to metal ion	2	0.00709365	MT1A;MT1M
epidermis morphogenesis	3	0.00243745	KLK14;FOXQ1;SOSTDC1	positive regulation of peptide hormone secretion	3	0.0377589	SLC30A8;BAIAP3;APLN	negative regulation of inflammatory response	5	0.0147838	TNFAIP8L2;KRT1;PGLYRP1;CXCL17;PROC	tissue development	37	1.78775e-05	ANKRD2;MYLK2;MYLK3;MYOZ2;METTL21C;KLHL41;BMPR2;BDH2;CRIP1;KRT36;MYOM3;STAC3;MYO18B;ACTN2;ACTA1;CASQ1;VGLL2;MYH7;SMYD1;NEUROD1;ANKRD1;TNNI1;MYL2;NRAP;CSRP3;HES7;WNT4;NEUROG3;GPC3;MYOM1;LOR;MYOM2;ENO3;RYR1;TTN;KRTAP21-1;MYOD1	olfactory receptor activity	14	0.000404375	OR4A5;OR5J2;OR6K6;OR56B4;OR51G2;OR7G3;OR10W1;OR52H1;OR1J4;OR5C1;OR14A16;OR5K4;OR5T2;OR9Q2	T-helper cell lineage commitment	2	0.00709365	IRF4;IL6
Midazolam	3	0.00243745	GABRA1;GABRG2;GABRP	positive regulation of ion transmembrane transporter activity	3	0.0377589	GALR2;TRDN;STAC3	response to fatty acid	4	0.0147845	CPS1;UCP1;PDK3;GLDC	organelle assembly	22	1.88462e-05	MYLK3;MYOZ2;DYNLRB2;KLHL41;MYOM3;ACTN2;ACTA1;CASQ1;MYPN;CROCC;ANKRD1;MYL2;NRAP;CSRP3;RPL3L;LMOD2;SYNPO2L;MYOM1;MYOM2;TNNT1;TTN;WBP2NL	intrinsic component of plasma membrane	38	0.00041786	ADGRG7;RXFP1;SLCO1B7;UGT1A1;CEACAM5;TEX101;SLC6A15;RAPGEF2;GLRA3;NETO1;CACNG3;TRPC5;GRID2;ABCB5;ECEL1;FOLR3;UNC5A;ATP12A;FFAR4;PCDHA5;TNFRSF13B;APH1B;CHRM2;OPRM1;C6;CHRM3;GRIN2C;ADAM2;KCNV1;PCDHGA3;KCNC2;OR5T2;CHRNA3;GHSR;SLC22A6;GRM7;SLC2A2;NMBR	Ethchlorvynol	2	0.00709365	GABRG2;GABRA1
Isoflurane	3	0.00243745	GABRA1;GABRG2;GABRP	body fluid secretion	3	0.0377589	GOT2;APLN;OPRK1	transporter activity	23	0.0152582	ABCB7;SV2B;GC;SLC3A1;GLRA3;UCP1;ATP12A;ABCC12;AQP10;GJA3;SLC44A5;RHBG;GRID2;MIA2;CACNA2D2;CACNA1I;TMC1;OTOP3;SLC16A14;GABRA1;TNFAIP8L3;SLC22A16;KCNC2	telethonin binding	3	2.77951e-05	MYOZ2;CSRP3;TTN	norepinephrine metabolic process	3	0.000427107	DBH;TH;INSM1	Flumazenil	2	0.00709365	GABRG2;GABRA1
Apalutamide	3	0.00243745	GABRA1;GABRG2;GABRP	cellular response to morphine	1	0.0386053	OPRM1	peptidase inhibitor activity	6	0.0154534	SPINK1;AGT;SERPIND1;SERPINA4;AHSG;DPEP1	cellular component morphogenesis	25	2.82255e-05	UNC5C;MYLK3;MYOZ2;KLHL41;BMPR2;SPTA1;MYOM3;ACTN2;ACTA1;CASQ1;MYPN;CAMK2A;ANKRD1;MYL2;NRAP;CSRP3;LMOD2;NEUROG3;SYNPO2L;CDKL3;MYOM1;MYOM2;TNNT1;ITGB7;TTN	Disopyramide	3	0.000427107	CYP3A4;CHRM2;CHRM3	Fludiazepam	2	0.00709365	GABRG2;GABRA1
Schwann cell proliferation	2	0.00250527	ASCL2;GFAP	cellular response to isoquinoline alkaloid	1	0.0386053	OPRM1	endopeptidase regulator activity	6	0.0154534	SPINK1;AGT;SERPIND1;SERPINA4;AHSG;DPEP1	myosin complex	6	3.02185e-05	MYO18B;MYH7;MYL2;MYOM1;MYOM2;MYH8	Loperamide	3	0.000427107	CYP3A4;CYP2B6;OPRM1	Cinolazepam	2	0.00709365	GABRG2;GABRA1
negative regulation of natural killer cell activation	2	0.00250527	PGLYRP4;PGLYRP1	positive regulation of protein monoubiquitination	1	0.0386053	BIRC2	cellular sodium ion homeostasis	2	0.0159665	AGT;ATP12A	skeletal muscle contraction	5	3.49369e-05	STAC3;CASQ1;MYH7;TNNT1;MYH8	Bupropion	3	0.000427107	CYP3A4;CYP2B6;CHRNA3	peptide secretion	11	0.00721088	PAEP;MAFA;CARTPT;ANKRD1;KCNA5;NOS2;IL6;FOXA2;FGA;SYT4;APOA2
spherical high-density lipoprotein particle	2	0.00250527	APOA2;HPR	macrophage inflammatory protein-1 alpha production	1	0.0386053	MEFV	linoleic acid metabolic process	2	0.0159665	FADS1;ALOX12B	regulation of metal ion transport	13	3.7378e-05	FXYD4;TRDN;METTL21C;KCNRG;STAC3;ACTN2;EPO;GALR2;CASQ1;DHRS7C;CAMK2A;SLN;OPRK1	peptidase inhibitor activity	9	0.000438053	CST1;WFDC5;CST4;AGT;DPEP1;CST2;SMR3A;WFDC12;SERPIND1	intrinsic component of plasma membrane	23	0.00721524	OPRD1;GABRG2;CALHM3;HAS1;B3GNT3;ART3;SLC24A4;GRM3;RHCG;GPRC6A;SLC16A12;GABRA1;MS4A1;KCNA5;IL6;CD19;SLC6A5;MFSD2A;ICOS;NRXN1;CD69;OR10H3;ATP1B4
alpha-(1->3)-fucosyltransferase activity	2	0.00250527	FUT3;FUT7	regulation of macrophage inflammatory protein 1 alpha production	1	0.0386053	MEFV	regulation of flagellated sperm motility	2	0.0159665	SEMG2;SEMG1	skeletal muscle cell differentiation	6	4.64791e-05	ANKRD2;MYLK2;KLHL41;SMYD1;ANKRD1;MYOD1	endopeptidase regulator activity	9	0.000438053	CST1;WFDC5;CST4;AGT;DPEP1;CST2;SMR3A;WFDC12;SERPIND1	peptidase regulator activity	6	0.00725594	SPINK2;LCN1;SLPI;SPINT3;SPOCK2;PI16
Etizolam	2	0.00250527	GABRA1;GABRG2	oligodendrocyte cell fate specification	1	0.0386053	OLIG2	ammonium transmembrane transport	2	0.0159665	RHBG;SLC22A16	myosin filament	4	4.83439e-05	MYH7;MYOM1;MYOM2;MYH8	fertilization	9	0.000476028	TEX101;FOLR3;TNP2;CATSPERD;MAEL;ZAN;ADAM2;DAZ2;RAD21L1	detection of chemical stimulus involved in sensory perception	9	0.0072961	OR2T10;OR5M11;OR14I1;OR2T5;OR10G7;OR6K2;OR2T35;OR10H3;OR2AG1
positive regulation of cell killing	4	0.00254196	PGLYRP4;FCER2;PGLYRP1;NOS2	oligodendrocyte cell fate commitment	1	0.0386053	OLIG2	Losartan	2	0.0159665	UGT1A1;UGT2B17	regulation of ion transmembrane transporter activity	10	6.12414e-05	FXYD4;TRDN;KCNRG;STAC3;ACTN2;EPO;GALR2;CASQ1;SHISA8;SLN	second-messenger-mediated signaling	15	0.000523813	CALML5;ADGRG7;RXFP1;AZU1;RAPGEF2;IAPP;AGT;IRGM;GPHA2;VIP;GHRHR;OPRM1;GRIN2C;KCNC2;PDX1	protein homodimerization activity	14	0.0076325	CD247;MAFA;GZMA;CD79A;GPD1;DMRT2;PVALB;CDH18;PON3;NOS2;JCHAIN;CD69;SYT4;APOA2
Methoxyflurane	3	0.00269952	GABRA1;GABRG2;GABRP	glial cell fate specification	1	0.0386053	OLIG2	acute-phase response	3	0.0167555	UGT1A1;ORM1;AHSG	transition between fast and slow fiber	3	6.57887e-05	MYH7;TNNI1;TNNT1	Naloxone	3	0.000549966	UGT1A1;CYP3A4;OPRM1	negative regulation of catalytic activity	13	0.00784975	SPINK2;LCN1;FABP4;GZMA;GRM3;SLPI;SPINT3;SPOCK2;PPP1R27;FOXA2;DUSP5;PI16;APOA2
specific granule lumen	4	0.00304662	ORM1;AOC1;CXCL1;PGLYRP1	positive regulation of melanocyte differentiation	1	0.0386053	ADAMTS9	retina morphogenesis in camera-type eye	3	0.0167555	IRX5;RS1;SDK1	heart contraction	10	6.831e-05	MYLK2;TRDN;CASQ1;MYH7;MYL2;APLN;CSRP3;TNNT1;RYR1;TTN	Antipyrine	3	0.000549966	CYP3A4;CYP2B6;SLC22A6	Mineral absorption	3	0.00790213	MT1A;MT1M;ATP1B4
regulation of response to stress	24	0.00307333	FIGNL2;FOXA2;CR2;AHSG;PGLYRP4;CD19;KRT1;CXCL17;SEMA3A;IRF4;UNC5CL;CNR2;TNFAIP8L2;SCGB1A1;VTN;FGG;DUOXA1;PRRX1;PROC;PGLYRP1;TMPRSS6;IL22RA2;CCL24;NOS2	regulation of homophilic cell adhesion	1	0.0386053	PTPRR	response to ammonium ion	5	0.0172409	SDK1;GLDC;GABRA1;AOC1;KCNC2	regulation of release of sequestered calcium ion into cytosol by sarcoplasmic reticulum	4	6.92025e-05	TRDN;METTL21C;CASQ1;DHRS7C	Dextromethorphan	4	0.000567165	CYP3A4;CYP2B6;OPRM1;CHRNA3	regulation of flagellated sperm motility	2	0.00799752	SEMG2;SEMG1
Oxycodone	2	0.00320063	OPRD1;ORM1	tricuspid valve morphogenesis	1	0.0386053	BMPR2	regulation of acrosome reaction	2	0.0178278	SPINK1;ZP2	actin filament binding	9	8.65279e-05	SPTA1;MYOM3;ACTN2;MYH7;NRAP;MYOM1;MYOM2;TTN;MYH8	axonemal dynein complex assembly	4	0.000644652	DNAI2;DNAH8;DRC1;DNAAF3	myoblast proliferation	2	0.00799752	ANKRD2;KCNA5
Adipiplon	2	0.00320063	GABRA1;GABRG2	retrograde trans-synaptic signaling by lipid	1	0.0386053	DAGLA	detection of external biotic stimulus	2	0.0178278	PGLYRP4;PGLYRP1	heart process	10	9.38239e-05	MYLK2;TRDN;CASQ1;MYH7;MYL2;APLN;CSRP3;TNNT1;RYR1;TTN	sperm-egg recognition	5	0.000645549	TEX101;FOLR3;CATSPERD;ZAN;ADAM2	CD4-positive, alpha-beta T cell lineage commitment	2	0.00799752	IRF4;IL6
5,7,2鈥?trihydroxy-6,8-dimethoxyflavone	2	0.00320063	GABRA1;GABRG2	retrograde trans-synaptic signaling by endocannabinoid	1	0.0386053	DAGLA	Buprenorphine	2	0.0178278	UGT1A1;OPRD1	circulatory system development	23	9.59497e-05	MYLK2;MYLK3;BMPR2;CRIP1;MYOM3;MYO18B;ACTN2;MYH7;SMYD1;ANKRD1;TNNI1;MYL2;APLN;NRAP;CSRP3;WNT4;GPC3;SYNPO2L;MYOM1;MYOM2;FOSL1;RYR1;TTN	ganglion development	3	0.000693313	PHOX2B;POU4F2;INSM1	vacuolar proton-transporting V-type ATPase complex	2	0.00799752	ATP6V0A4;ATP6V0D2
Pentobarbital	3	0.0032742	GABRA1;GABRG2;GABRP	positive regulation of corticotropin secretion	1	0.0386053	APLN	Fluvastatin	2	0.0178278	UGT1A1;CYP1A1	regulation of the force of heart contraction	4	0.00012949	MYH7;MYL2;APLN;CSRP3	Cerivastatin	3	0.000693313	UGT1A1;CYP3A4;CYP2B6	Methyprylon	2	0.00799752	GABRG2;GABRA1
protein homotrimerization	3	0.00358746	ITLN1;CD247;TCL1A	chondroblast differentiation	1	0.0386053	FGF4	Amiodarone	2	0.0178278	CYP1A1;CACNA2D2	multicellular organismal movement	5	0.000138061	STAC3;CASQ1;MYH7;TNNT1;MYH8	Paroxetine	3	0.000693313	CYP2B6;CHRM2;CHRM3	Silver	2	0.00799752	MT1A;MT1M
negative regulation of interferon-gamma production	3	0.00358746	PGLYRP4;SCGB1A1;PGLYRP1	positive regulation of protein localization to cilium	1	0.0386053	CROCC	Manidipine	2	0.0178278	CYP1A1;CACNA1I	musculoskeletal movement	5	0.000138061	STAC3;CASQ1;MYH7;TNNT1;MYH8	Dolutegravir	3	0.000693313	UGT1A1;CYP3A4;SLC22A6	response to metal ion	8	0.00800205	AQP2;MT1A;FABP4;OTC;FOSB;FGA;SYT4;MT1M
ammonium transmembrane transporter activity	3	0.00358746	RHCG;RHBG;SLC44A5	regulation of sequestering of zinc ion	1	0.0386053	SLC30A8	defense response to Gram-positive bacterium	4	0.0180053	PGLYRP4;PLA2G2A;RNASE6;PGLYRP1	regulation of system process	15	0.00016591	MYLK2;TRDN;BMPR2;CASQ1;MYH7;NEUROD1;TNNI1;MYL2;APLN;CSRP3;PRKAG3;SLN;TNNT1;OPRK1;RYR1	glucuronosyltransferase activity	4	0.000821627	UGT1A1;UGT1A10;UGT1A8;UGT2B11	negative regulation of hydrolase activity	9	0.00807705	SPINK2;LCN1;GZMA;SLPI;SPINT3;SPOCK2;PPP1R27;PI16;APOA2
regulation of response to wounding	6	0.00364073	FOXA2;KRT1;VTN;FGG;PROC;TMPRSS6	chromosome passenger complex	1	0.0386053	BIRC5	response to nitric oxide	2	0.0197762	DPEP1;KCNC2	titin binding	3	0.000168757	ANKRD2;ACTN2;ANKRD1	flavonoid metabolic process	3	0.000858421	UGT1A1;UGT1A10;UGT1A8	monocarboxylic acid transport	5	0.00843792	LCN1;FABP4;SLC16A12;NOS2;MFSD2A
glucuronosyltransferase activity	3	0.00391843	UGT2B17;UGT1A8;UGT2B7	protease inhibitor complex	1	0.0386053	KLK8	cellular response to reactive nitrogen species	2	0.0197762	DPEP1;KCNC2	anatomical structure formation involved in morphogenesis	23	0.000171011	MYLK3;MYOZ2;KLHL41;BMPR2;MYOM3;ACTN2;ACTA1;CASQ1;MYPN;ANKRD1;MYL2;APLN;NRAP;CSRP3;HES7;WNT4;LMOD2;SYNPO2L;MYOM1;MYOM2;TNNT1;TTN;MYOD1	Terfenadine	3	0.000858421	CYP3A4;CHRM2;CHRM3	endopeptidase activity	9	0.00855108	CAPN12;KLK14;GZMA;HPR;ASTL;KLK13;ADAMDEC1;CAPNS2;PRSS1
Diazepam	3	0.00391843	GABRA1;GABRG2;GABRP	peptidase inhibitor complex	1	0.0386053	KLK8	Flunitrazepam	2	0.0197762	UGT1A1;GABRA1	cytoskeleton organization	26	0.000206949	ACTL6B;MYLK3;MYOZ2;TRDN;KLHL41;MAP3K20;SPTA1;MYOM3;ACTN2;ACTA1;CASQ1;MYPN;CROCC;ANKRD1;MYL2;NRAP;CSRP3;WNT4;LMOD2;SYNPO2L;MYOM1;LOR;TRIM54;MYOM2;TNNT1;TTN	Promethazine	3	0.000858421	CYP2B6;CHRM2;CHRM3	regulation of inflammatory response	8	0.00866499	FABP4;IL22RA2;LBP;IL21;C2CD4B;NOS2;IL6;CD19
cytolysis in other organism	2	0.00397541	PGLYRP4;PGLYRP1	inner acrosomal membrane	1	0.0386053	TMEM190	defense response to bacterium	7	0.0199997	PGLYRP4;SEMG2;PLA2G2A;SEMG1;RNASE6;PGLYRP1;IGLL5	regulation of myoblast proliferation	3	0.000217869	ANKRD2;KLHL41;MYOD1	Nelfinavir	3	0.000858421	UGT1A1;CYP3A4;CYP2B6	enzyme inhibitor activity	8	0.00866499	SPINK2;LCN1;SLPI;SPINT3;SPOCK2;PPP1R27;PI16;APOA2
antimicrobial humoral immune response mediated by antimicrobial peptide	4	0.00403278	SEMG1;PGLYRP4;CXCL1;PGLYRP1	FATZ binding	1	0.0386053	MYOZ2	molecular function regulator	31	0.0200626	CCNB3;ARHGEF3;TG;RAP1GAP;UGT1A1;CDC20;CGA;IL16;SPINK1;PPP2R5A;AGT;GRM7;FGF22;SERPIND1;TCL1A;SERPINA4;RAPGEF2;UGT1A8;GRP;MIA2;DKK4;AHSG;RASGEF1C;GRM3;UTS2B;EIF2B4;IL25;DPEP1;AMBN;KLB;RLN1	regulation of skeletal muscle adaptation	3	0.000275374	MYH7;TNNI1;TNNT1	Pentose and glucuronate interconversions	4	0.00092184	UGT1A1;UGT1A10;UGT1A8;UGT2B11	external side of plasma membrane	7	0.00873988	CD79A;MS4A1;CD19;ICOS;IGLL5;FGA;CD69
postsynaptic membrane	9	0.00411068	OPRD1;LHFPL4;GABRA1;GRM3;GABRG2;GABRP;GRM7;GLRA3;DLGAP3	transforming growth factor beta receptor activity, type II	1	0.0386053	BMPR2	glutamate receptor signaling pathway	4	0.0201314	NECAB2;GRM7;GRID2;GRM3	muscle adaptation	6	0.000344467	MYOZ2;ACTA1;MYH7;TNNI1;TNNT1;MYOD1	Zonisamide	4	0.00103036	CACNA1I;UGT1A1;CYP3A4;CA6	positive regulation of monocyte chemotaxis	2	0.00895029	S100A7;S100A14
regulation of humoral immune response	4	0.00425302	CR2;CD19;FCER2;VTN	NAD(P)+-protein-arginine ADP-ribosyltransferase activity	1	0.0386053	ART1	serine-type endopeptidase inhibitor activity	4	0.0201314	SPINK1;AGT;SERPIND1;SERPINA4	negative regulation of ion transmembrane transporter activity	5	0.000417945	TRDN;KCNRG;ACTN2;EPO;SLN	Phenobarbital	4	0.00103036	UGT1A1;CYP3A4;CYP2B6;GRIN2C	Lorazepam	2	0.00895029	GABRG2;GABRA1
interleukin-4 production	3	0.0042674	IRF4;SCGB1A1;VTCN1	carbonyl reductase (NADPH) activity	1	0.0386053	CBR3	steroid binding	4	0.0216312	IRX5;UGT1A1;GC;UGT1A8	myosin binding	5	0.000447721	MYLK2;AMPD1;ACTA1;MYL2;MYH8	amino acid binding	5	0.00104723	TDO2;GLRA3;GLDC;TH;GRM7	Meprobamate	2	0.00895029	GABRG2;GABRA1
Pentose and glucuronate interconversions	3	0.0042674	UGT2B17;UGT1A8;UGT2B7	3-keto sterol reductase activity	1	0.0386053	CBR3	signaling pattern recognition receptor activity	2	0.0218093	PGLYRP4;PGLYRP1	myoblast proliferation	3	0.000503868	ANKRD2;KLHL41;MYOD1	locomotory behavior	9	0.00106439	DBH;SEZ6;FEZF2;OTOG;APH1B;OPRM1;TH;CHRNA3;GHSR	Chlordiazepoxide	2	0.00895029	GABRG2;GABRA1
regulation of hormone levels	12	0.00449153	FOXA2;CGA;TG;CARTPT;UGT1A8;NMU;FGG;DUOXA1;HNF1A;CRABP2;UGT2B7;NOS2	serotonin-gated cation-selective channel activity	1	0.0386053	HTR3B	pattern recognition receptor activity	2	0.0218093	PGLYRP4;PGLYRP1	blood circulation	13	0.000526902	MYLK2;MYLK3;TRDN;BMPR2;EPO;CASQ1;MYH7;MYL2;APLN;CSRP3;TNNT1;RYR1;TTN	glutamate receptor signaling pathway	6	0.0010888	NETO1;CACNG3;GRID2;OPRM1;GRIN2C;GRM7	Adinazolam	2	0.00895029	GABRG2;GABRA1
negative regulation of leukocyte activation	6	0.0045343	PGLYRP4;CNR2;TNFAIP8L2;SCGB1A1;VTCN1;PGLYRP1	Phenylalanine, tyrosine and tryptophan biosynthesis	1	0.0386053	GOT2	Menadione	2	0.0218093	CYP1A1;PROC	Oxytocin signaling pathway	7	0.000592961	MYLK2;MYLK3;CAMK2A;PLA2G4E;CAMK1D;PRKAG3;RYR1	axoneme assembly	5	0.00112891	DNAI2;RP1;DNAH8;DRC1;DNAAF3	Clorazepate	2	0.00895029	GABRG2;GABRA1
coagulation	9	0.00454343	SEMG2;SEMG1;FOXA2;KRT1;ANXA8;VTN;FGG;PROC;TMPRSS6	Tianeptine	1	0.0386053	OPRM1	Mycophenolate mofetil	2	0.0218093	UGT1A1;UGT1A8	muscle myosin complex	3	0.000600477	MYH7;MYOM1;MYH8	Propofol	4	0.00114754	UGT1A1;CYP3A4;UGT1A8;CYP2B6	Glutethimide	2	0.00895029	GABRG2;GABRA1
Prasterone	3	0.00463464	GABRA1;GABRG2;GABRP	regulation of sensory perception of pain	2	0.0392344	OPRM1;OPRK1	Mibefradil	2	0.0218093	CYP1A1;CACNA1I	circulatory system process	13	0.00062851	MYLK2;MYLK3;TRDN;BMPR2;EPO;CASQ1;MYH7;MYL2;APLN;CSRP3;TNNT1;RYR1;TTN	Desipramine	4	0.00114754	CYP3A4;CYP2B6;CHRM2;CHRM3	Thiocolchicoside	2	0.00895029	GABRG2;GABRA1
positive regulation of cytolysis	2	0.00482806	PGLYRP4;PGLYRP1	dendrite membrane	2	0.0392344	OPRM1;SHISA8	cellular response to fatty acid	3	0.0230286	CPS1;UCP1;PDK3	negative regulation of transporter activity	5	0.000703155	TRDN;KCNRG;ACTN2;EPO;SLN	organic hydroxy compound biosynthetic process	10	0.0011856	DBH;RAPGEF2;CYP3A4;PCBD2;IDI2;CYP11B1;TH;CD244;INSM1;BMP5	response to zinc ion	3	0.00924979	MT1A;OTC;MT1M
benzodiazepine receptor activity	2	0.00482806	GABRA1;GABRG2	phospholipase C-activating G protein-coupled receptor signaling pathway	3	0.039801	OPRM1;GALR2;OPRK1	Autoimmune thyroid disease	3	0.0230286	TG;CGA;HLA-DMB	response to muscle stretch	3	0.000708156	ANKRD1;CSRP3;TTN	humoral immune response	10	0.00122303	PLA2G2A;AZU1;C4BPB;RNASE6;TFE3;COLEC10;IFNK;PGC;C6;IFNA8	B cell receptor signaling pathway	3	0.00924979	CD79A;CD19;IGLL5
Codeine	2	0.00482806	OPRD1;UGT2B7	behavior	9	0.0400361	PCDH17;APH1B;OPRM1;GALR2;KLK8;APLN;BRS3;OPRK1;NPW	establishment of skin barrier	2	0.0239251	KRT1;ALOX12B	voluntary skeletal muscle contraction	2	0.000862382	MYH7;TNNT1	P granule	3	0.00125871	PIWIL1;DDX4;MAEL	protein trimerization	3	0.00924979	CD247;OTC;TCL1A
Tapentadol	2	0.00482806	OPRD1;UGT2B7	sensory perception of smell	7	0.0402452	OR51G2;OR51B4;OR7G3;OR7C2;OR10W1;UGT2A1;OR1A1	negative regulation of tumor necrosis factor-mediated signaling pathway	2	0.0239251	TRAIP;NLRP2B	twitch skeletal muscle contraction	2	0.000862382	MYH7;TNNT1	pole plasm	3	0.00125871	PIWIL1;DDX4;MAEL	social behavior	3	0.00924979	NPAS4;EN1;NRXN1
monocarboxylic acid binding	4	0.00521503	UGT2B17;UGT1A8;CRABP2;UGT2B7	regulation of sensory perception	2	0.0410387	OPRM1;OPRK1	vitamin D metabolic process	2	0.0239251	GC;CYP1A1	FATZ binding	2	0.000862382	MYOZ2;ACTN2	germ plasm	3	0.00125871	PIWIL1;DDX4;MAEL	intraspecies interaction between organisms	3	0.00924979	NPAS4;EN1;NRXN1
chloride channel activity	4	0.00574647	GABRA1;GABRG2;GABRP;GLRA3	negative regulation of peptidase activity	5	0.0421294	BIRC2;LCN1;CST1;CST4;BIRC5	oxidoreductase activity, acting on the CH-NH2 group of donors	2	0.0239251	GLDC;AOC1	regulation of protein depolymerization	5	0.000890916	SPTA1;ACTN2;LMOD2;SLN;TRIM54	Fluoxetine	3	0.00125871	CYP3A4;CYP2B6;CHRNA3	calcium ion binding	12	0.0092644	CAPN12;PVALB;CDH18;PLA2G4D;CALB2;SPOCK2;S100A7;CAPNS2;NRXN1;CD69;S100A14;SYT4
insemination	2	0.00575699	SEMG1;KLK14	membrane region	6	0.0426488	TEX101;BIRC2;OPRM1;UNC5A;BMPR2;TMEM190	monooxygenase activity	4	0.0240061	PCBD2;CYP1A1;CYP4X1;AGMO	regulation of muscle adaptation	5	0.00111368	CASQ1;MYH7;TNNI1;PRKAG3;TNNT1	Carbamazepine	3	0.00125871	UGT1A1;CYP3A4;CYP2B6	positive regulation of response to external stimulus	7	0.00938356	FABP4;LBP;IL21;C2CD4B;IL6;S100A7;S100A14
detection of bacterium	2	0.00575699	PGLYRP4;PGLYRP1	regulation of actin filament-based movement	2	0.0428738	MYLK2;CTNNA3	regulation of inflammatory response	9	0.0241377	AGT;PLA2G2A;CR2;TNFAIP8L2;KRT1;PGLYRP1;CXCL17;PROC;AHSG	Hypertrophic cardiomyopathy (HCM)	5	0.00111368	MYH7;MYL2;PRKAG3;ITGB7;TTN	sensory perception of mechanical stimulus	8	0.00127105	DRGX;OTOG;USH1C;BARHL1;COL2A1;POU4F2;TH;GRM7	proximal promoter sequence-specific DNA binding	10	0.00949406	ETV4;MAFA;IRF4;POU2AF1;FOXI1;NPAS4;EN1;NEUROG3;FOSB;FOXA2
gastro-intestinal system smooth muscle contraction	2	0.00575699	HTR1D;NMU	anterograde trans-synaptic signaling	10	0.043533	PCDH17;OPRM1;MYLK2;LRRTM2;CPLX2;BAIAP3;SHISA8;OPRK1;HTR3B;STAC3	B cell receptor signaling pathway	3	0.0241817	GCSAM;LPXN;IGLL5	actin filament organization	11	0.00113876	SPTA1;MYOM3;ACTN2;ACTA1;NRAP;WNT4;LMOD2;SYNPO2L;MYOM1;MYOM2;TTN	integral component of plasma membrane	35	0.00133537	ADGRG7;RXFP1;SLCO1B7;UGT1A1;CEACAM5;SLC6A15;RAPGEF2;GLRA3;NETO1;CACNG3;TRPC5;GRID2;ABCB5;ECEL1;ATP12A;FFAR4;PCDHA5;TNFRSF13B;APH1B;CHRM2;OPRM1;C6;CHRM3;GRIN2C;ADAM2;KCNV1;PCDHGA3;KCNC2;OR5T2;CHRNA3;GHSR;SLC22A6;GRM7;SLC2A2;NMBR	protein complex oligomerization	10	0.00973514	SEMG2;OPRD1;SEMG1;CD247;HBA1;CD79A;OTC;KCNA5;JCHAIN;TCL1A
astrocyte projection	2	0.00575699	GFAP;SYT4	sensory perception of bitter taste	2	0.0447391	CST1;CST4	social behavior	3	0.0241817	CNTNAP2;GRP;GRPR	regulation of muscle system process	8	0.00121845	MYLK2;CASQ1;MYH7;TNNI1;MYL2;PRKAG3;SLN;TNNT1	response to food	4	0.00140935	PRKCG;OPRM1;GHSR;CLPSL1	negative regulation of tissue remodeling	2	0.00995113	CARTPT;IL6
activation of immune response	12	0.0058649	IGLL5;CR2;CD79A;CD247;PGLYRP4;CD19;KRT1;IRF4;VTCN1;VTN;FGG;PGLYRP1	regulation of protein monoubiquitination	1	0.0461469	BIRC2	intraspecies interaction between organisms	3	0.0241817	CNTNAP2;GRP;GRPR	cardiac muscle contraction	6	0.00122971	MYLK2;MYH7;MYL2;CSRP3;TNNT1;TTN	Tamoxifen	4	0.00140935	CYP3A4;UGT1A10;PRKCG;CYP2B6	arginine metabolic process	2	0.00995113	OTC;NOS2
transmembrane transporter activity	19	0.00601168	GC;RHCG;ABCC12;GABRA1;GABRG2;OTOP3;GABRP;GJA3;SLC16A14;RHBG;GLRA3;KCNK5;ABCB7;SV2B;SLC44A5;AQP10;ATP12A;ABCC11;SLC3A1	regulation of melanocyte differentiation	1	0.0461469	ADAMTS9	steroid metabolic process	8	0.0259606	UGT1A1;GC;UGT2B17;CGA;AGT;UGT1A8;CYP1A1;UGT2B11	myoblast differentiation	5	0.00123937	ANKRD2;KLHL41;SMYD1;ANKRD1;MYOD1	monooxygenase activity	6	0.00144107	DBH;CYP3A4;PCBD2;CYP2B6;CYP11B1;TH	alpha-beta T cell lineage commitment	2	0.00995113	IRF4;IL6
cell maturation	6	0.00625153	SEMG2;SEMG1;SPINK1;IRX5;FGG;PAEP	tricuspid valve development	1	0.0461469	BMPR2	microvillus assembly	2	0.0261213	RAP1GAP;RAPGEF2	myosin II complex	3	0.00125902	MYH7;MYOM1;MYH8	response to ammonium ion	7	0.0014957	GLDC;PRKCG;CHRM2;OPRM1;CHRM3;KCNC2;CHRNA3	GABA-A receptor complex	2	0.00995113	GABRG2;GABRA1
Halothane	3	0.00629158	GABRA1;GABRG2;GABRP	positive regulation of ryanodine-sensitive calcium-release channel activity	1	0.0461469	TRDN	retina layer formation	2	0.0261213	RS1;SDK1	structural molecule activity	17	0.00131605	ACTL6B;ANKRD2;GNL1;SPTA1;KRT36;MYOM3;ACTN2;ACTA1;CROCC;MYL2;CSRP3;RPL3L;MYOM1;LOR;MYOM2;TTN;MYH8	piRNA metabolic process	3	0.00149616	PIWIL1;DDX4;MAEL	GABA-A receptor activity	2	0.00995113	GABRG2;GABRA1
dendrite membrane	3	0.00675399	OPRD1;GABRA1;GABRG2	L-kynurenine metabolic process	1	0.0461469	GOT2	detection of biotic stimulus	2	0.0261213	PGLYRP4;PGLYRP1	regulation of myoblast differentiation	4	0.00154284	ANKRD2;KLHL41;SMYD1;MYOD1	axonemal dynein complex	3	0.00149616	DNAI2;DNAH8;DRC1	Halazepam	2	0.00995113	GABRG2;GABRA1
Nicotine addiction	3	0.00675399	GABRA1;GABRG2;GABRP	positive regulation of dopamine secretion	1	0.0461469	OPRK1	aromatase activity	2	0.0261213	CYP1A1;CYP4X1	negative regulation of ion transmembrane transport	5	0.00159929	TRDN;KCNRG;ACTN2;EPO;SLN	Simvastatin	3	0.00149616	UGT1A1;CYP3A4;CYP2B6	Flunitrazepam	2	0.00995113	GABRG2;GABRA1
Lamotrigine	3	0.00675399	GABRA1;GABRG2;GABRP	retinal blood vessel morphogenesis	1	0.0461469	LAMA1	Cinnarizine	2	0.0261213	CYP1A1;CACNA1I	sarcolemma	6	0.00168535	STAC3;CASQ1;CAVIN4;GOT2;TRIM72;RYR1	Irinotecan	3	0.00149616	UGT1A1;CYP3A4;CYP2B6	negative regulation of multi-organism process	5	0.010591	PAEP;LBP;ASTL;AICDA;SLPI
detection of other organism	2	0.00676067	PGLYRP4;PGLYRP1	regulation of corticotropin secretion	1	0.0461469	APLN	cell recognition	5	0.0275688	ZP2;CNTNAP2;FUT3;IGLL5;SPESP1	cellular divalent inorganic cation homeostasis	12	0.00176283	TRDN;METTL21C;FPR1;EPO;GALR2;CASQ1;DHRS7C;CSRP3;ACKR2;SLC30A8;RYR1;WBP2NL	Buprenorphine	3	0.00149616	UGT1A1;CYP3A4;OPRM1	neuron projection membrane	3	0.0107237	OPRD1;GABRG2;GABRA1
fucosyltransferase activity	2	0.00676067	FUT3;FUT7	positive regulation of response to extracellular stimulus	1	0.0461469	OPRM1	iron ion binding	5	0.0282759	CYP1A1;ALOX12B;CYP4X1;AGMO;HBQ1	negative regulation of vasoconstriction	2	0.00178869	BMPR2;APLN	Fluvastatin	3	0.00149616	UGT1A1;CYP3A4;CYP2B6	Th17 cell differentiation	4	0.0107638	CD247;IRF4;IL21;IL6
peptidoglycan muralytic activity	2	0.00676067	PGLYRP4;PGLYRP1	positive regulation of response to nutrient levels	1	0.0461469	OPRM1	regulation of water loss via skin	2	0.0283959	KRT1;ALOX12B	junctional membrane complex	2	0.00178869	TRDN;RYR1	Manidipine	3	0.00149616	CACNA1I;CYP3A4;CYP2B6	response to corticosteroid	5	0.0108513	METTL21C;NPAS4;IL6;FOSB;APOA2
Zolpidem	2	0.00676067	GABRA1;GABRG2	bundle of His cell-Purkinje myocyte adhesion involved in cell communication	1	0.0461469	CTNNA3	regulation of histone H3-K9 methylation	2	0.0283959	PRDM12;HIST1H1B	myosin light chain binding	2	0.00178869	MYLK2;MYH8	Letermovir	3	0.00149616	UGT1A1;CYP3A4;CYP2B6	copulation	2	0.0109992	SEMG1;KLK14
Complement and coagulation cascades	4	0.00723009	CR2;VTN;FGG;PROC	leukotriene D4 metabolic process	1	0.0461469	GGTLC2	tetrapyrrole metabolic process	3	0.0304076	UGT1A1;CYP1A1;CTRB1	Apelin signaling pathway	6	0.00188572	MYLK2;MYLK3;MYL2;APLN;PRKAG3;RYR1	cyclic-nucleotide-mediated signaling	9	0.00155257	ADGRG7;RXFP1;RAPGEF2;IAPP;GPHA2;VIP;GHRHR;OPRM1;KCNC2	vacuolar acidification	2	0.0109992	ATP6V0A4;ATP6V0D2
side of membrane	11	0.00724656	IGLL5;CD79A;CD19;CNR2;VTCN1;FCER2;GFAP;XCR1;FGG;MS4A1;CXCR5	leukotriene D4 biosynthetic process	1	0.0461469	GGTLC2	benzene-containing compound metabolic process	2	0.0307467	UGT1A1;TDO2	regulation of myotube differentiation	4	0.0018934	ANKRD2;SMYD1;TRIM72;MYOD1	cellular response to ammonium ion	5	0.0016099	CHRM2;OPRM1;CHRM3;KCNC2;CHRNA3	dense core granule	2	0.0109992	OPRD1;SYT4
protein secretion	12	0.0073487	ORM1;FOXA2;CARTPT;APOA2;VTCN1;NMU;MIA2;FGG;SYT4;HNF1A;PAEP;NOS2	protein K29-linked ubiquitination	1	0.0461469	RNF186	regulation of B cell receptor signaling pathway	2	0.0307467	GCSAM;LPXN	positive regulation of ion transmembrane transporter activity	5	0.00193831	TRDN;STAC3;ACTN2;GALR2;CASQ1	piP-body	2	0.00161314	DDX4;MAEL	GABA receptor complex	2	0.0109992	GABRG2;GABRA1
inorganic anion transport	6	0.0075653	TG;GABRA1;GABRG2;GABRP;GLRA3;ABCC11	negative regulation of myelination	1	0.0461469	KLK8	estrogen metabolic process	2	0.0307467	UGT1A1;UGT2B11	animal organ morphogenesis	19	0.00207649	MYLK2;BMPR2;CRIP1;HCN1;MYOM3;ACTA1;MYH7;NEUROD1;ANKRD1;TNNI1;MYL2;WNT4;GPC3;SYNPO2L;MYOM1;MYOM2;RYR1;LY6H;TTN	Cevimeline	2	0.00161314	CYP3A4;CHRM3	Butabarbital	2	0.0109992	GABRG2;GABRA1
negative regulation of endopeptidase activity	7	0.00765079	SPINK1;AHSG;ANXA8;SERPINA4;VTN;SPINK2;SPINT3	endoplasmic reticulum membrane organization	1	0.0461469	TRDN	INO80-type complex	2	0.0307467	INO80E;ACTR8	positive regulation of transmembrane transport	7	0.00222713	TRDN;STAC3;ACTN2;GALR2;CASQ1;GPC3;OPRK1	Succinylcholine	2	0.00161314	CHRM2;CHRM3	Butalbital	2	0.0109992	GABRG2;GABRA1
Porphyrin and chlorophyll metabolism	3	0.0077381	UGT2B17;UGT1A8;UGT2B7	spanning component of plasma membrane	1	0.0461469	BMPR2	neuropeptide binding	2	0.0307467	OPRD1;GRPR	calmodulin binding	7	0.00229348	MYLK2;MYH7;CAMK2A;CAMK1D;RYR1;TTN;MYH8	Ropivacaine	2	0.00161314	CYP3A4;CYP2B6	Talbutal	2	0.0109992	GABRG2;GABRA1
regulation of natural killer cell differentiation	2	0.0078376	PGLYRP4;PGLYRP1	eukaryotic translation initiation factor 2B complex	1	0.0461469	EIF2B1	secondary metabolic process	3	0.0317444	RAPGEF2;UGT1A8;CYP1A1	regulation of striated muscle cell differentiation	5	0.00232712	ANKRD2;MYLK3;SMYD1;TRIM72;MYOD1	Metixene	2	0.00161314	CHRM2;CHRM3	Alprazolam	2	0.0109992	GABRG2;GABRA1
Pitavastatin	2	0.0078376	ORM1;UGT2B7	transcription factor TFIIA complex	1	0.0461469	TBP	neural retina development	3	0.0317444	IRX5;RS1;SDK1	actin filament	5	0.00232712	MYO18B;ACTN2;ACTA1;LMOD2;ACKR2	Trihexyphenidyl	2	0.00161314	CHRM2;CHRM3	Metharbital	2	0.0109992	GABRG2;GABRA1
cytokine binding	5	0.00787293	XCR1;SOSTDC1;SPINT3;IL22RA2;CXCR5	transcription factor TFIIIB complex	1	0.0461469	TBP	killing of cells of other organism	3	0.0317444	PGLYRP4;SEMG1;PGLYRP1	sarcoplasmic reticulum lumen	2	0.0023702	TRDN;CASQ1	Paramethadione	2	0.00161314	CACNA1I;CYP3A4	Estazolam	2	0.0109992	GABRG2;GABRA1
transporter activity	21	0.00833903	GC;RHCG;ABCC12;GABRA1;GABRG2;OTOP3;GABRP;GJA3;SLC16A14;APOA2;RHBG;GLRA3;KCNK5;ABCB7;SV2B;SLC44A5;MIA2;AQP10;ATP12A;ABCC11;SLC3A1	gamma-secretase complex	1	0.0461469	APH1B	disruption of cells of other organism	3	0.0317444	PGLYRP4;SEMG1;PGLYRP1	troponin complex	2	0.0023702	TNNI1;TNNT1	Homatropine Methylbromide	2	0.00161314	CHRM2;CHRM3	Clotiazepam	2	0.0109992	GABRG2;GABRA1
ABC transporters	3	0.00880251	ABCC12;ABCB7;ABCC11	double-stranded RNA adenosine deaminase activity	1	0.0461469	ADAD2	secretory granule lumen	8	0.0320795	ORM1;SERPINA4;PRSS2;HSPA6;PGLYRP1;GRP;AHSG;AOC1	regulation of blood circulation	8	0.00244062	TRDN;BMPR2;CASQ1;MYH7;MYL2;APLN;CSRP3;RYR1	Cryptenamine	2	0.00161314	CHRM2;CHRM3	Prazepam	2	0.0109992	GABRG2;GABRA1
proteolysis	27	0.00887647	SEMG2;SEMG1;ACTR8;CGA;INO80E;KLK14;CR2;SPINK1;MMP13;AHSG;CPS1;CAPN12;CD19;ANXA8;SERPINA4;PRSS1;UNC5CL;HPR;VTN;PLGRKT;FGG;PROC;PRSS50;TMPRSS11A;SPINK2;SPINT3;TMPRSS6	MHC class II protein binding	1	0.0461469	COL2A1	regulation of lipid metabolic process	9	0.0329826	FADS1;UGT1A1;CGA;PPP2R5A;AGT;PDK3;UGT1A8;CYP1A1;TNFAIP8L3	neural retina development	4	0.00244178	ATOH7;HCN1;NEUROD1;SLC17A8	Metronidazole	2	0.00161314	UGT1A1;CYP3A4	cellular cation homeostasis	11	0.0110057	METTL21C;MT1A;SLC24A4;PVALB;CCKBR;CALB2;ATP6V0A4;ATP6V0D2;KCNA5;CD19;MT1M
positive regulation of interleukin-13 production	2	0.00898626	IRF4;PAEP	glutathione hydrolase activity	1	0.0461469	GGTLC2	icosanoid metabolic process	4	0.0330293	FADS1;CYP1A1;ALOX12B;DPEP1	positive regulation of ion transmembrane transport	6	0.00250845	TRDN;STAC3;ACTN2;GALR2;CASQ1;OPRK1	Cyclobenzaprine	2	0.00161314	UGT1A1;CYP3A4	endopeptidase inhibitor activity	5	0.011116	SPINK2;LCN1;SLPI;SPINT3;SPOCK2
Ino80 complex	2	0.00898626	ACTR8;INO80E	interleukin-12 receptor binding	1	0.0461469	IL12A	positive regulation of steroid metabolic process	2	0.0331718	CGA;AGT	divalent inorganic cation homeostasis	12	0.00252187	TRDN;METTL21C;FPR1;EPO;GALR2;CASQ1;DHRS7C;CSRP3;ACKR2;SLC30A8;RYR1;WBP2NL	Glipizide	2	0.00161314	UGT1A1;CYP3A4	B cell activation	6	0.0112426	CD79A;AICDA;IL21;MS4A1;IL6;IGLL5
DNA helicase complex	2	0.00898626	ACTR8;INO80E	acetylcholine receptor inhibitor activity	1	0.0461469	LY6H	negative regulation of steroid metabolic process	2	0.0331718	UGT1A1;UGT1A8	deaminase activity	3	0.00275049	AMPD1;ADAD2;APOBEC2	Bifonazole	2	0.00161314	CYP3A4;CYP2B6	signal release	9	0.0112462	MAFA;CARTPT;KCNA5;NOS2;IL6;FOXA2;FGA;NRXN1;SYT4
negative regulation of peptidase activity	7	0.00931737	SPINK1;AHSG;ANXA8;SERPINA4;VTN;SPINK2;SPINT3	melanocortin receptor activity	1	0.0461469	OPRM1	modified amino acid transport	2	0.0331718	SLC3A1;SLC22A16	junctional sarcoplasmic reticulum membrane	2	0.0030286	TRDN;RYR1	Permethrin	2	0.00161314	CYP3A4;CYP2B6	regulation of leukocyte chemotaxis	4	0.011463	LBP;IL6;S100A7;S100A14
chemokine-mediated signaling pathway	4	0.00931917	CXCL1;XCR1;CCL24;CXCR5	Ethylmorphine	1	0.0461469	OPRM1	Acetaminophen	2	0.0331718	UGT1A1;CYP1A1	cellular potassium ion transport	7	0.00304412	FXYD4;KCNRG;KCNA7;HCN1;ACTN2;GALR2;OPRK1	ALKS 27	2	0.00161314	CHRM2;CHRM3	glycerolipid catabolic process	3	0.0117775	FABP4;PLA2G4D;APOA2
collagen-containing extracellular matrix	9	0.00941349	TGM4;ORM1;AHSG;KRT1;ZP2;ANXA8;PRSS1;VTN;FGG	Serotonin	1	0.0461469	HTR3B	transmembrane transporter complex	8	0.0341453	GLRA3;ATP12A;CNTNAP2;GRID2;CACNA2D2;CACNA1I;GABRA1;KCNC2	potassium ion transmembrane transport	7	0.00304412	FXYD4;KCNRG;KCNA7;HCN1;ACTN2;GALR2;OPRK1	clomethiazole	2	0.00161314	CYP3A4;CYP2B6	CD4-positive or CD8-positive, alpha-beta T cell lineage commitment	2	0.0120938	IRF4;IL6
chloride transmembrane transport	4	0.00970161	GABRA1;GABRG2;GABRP;GLRA3	positive regulation of transporter activity	3	0.0462563	GALR2;TRDN;STAC3	specific granule lumen	3	0.0345091	ORM1;PGLYRP1;AOC1	regulation of muscle contraction	6	0.0030685	MYLK2;CASQ1;MYH7;TNNI1;MYL2;TNNT1	Tianeptine	2	0.00161314	CYP3A4;OPRM1	Arginine biosynthesis	2	0.0120938	OTC;NOS2
humoral immune response mediated by circulating immunoglobulin	3	0.00994855	IGLL5;CR2;FCER2	regulation of endocrine process	2	0.046634	APLN;OPRK1	oxidoreductase activity, acting on paired donors, with incorporation or reduction of molecular oxygen	5	0.0351588	FADS1;PCBD2;CYP1A1;CYP4X1;AGMO	transcription coactivator activity	9	0.00307976	ACTL6B;BIRC2;ACTN2;VGLL2;NEUROD1;ANKRD1;NEUROG3;MYOD1;WBP2NL	Tipranavir	2	0.00161314	UGT1A1;CYP3A4	Etomidate	2	0.0120938	GABRG2;GABRA1
regulation of protein secretion	10	0.010072	ORM1;FOXA2;CARTPT;APOA2;VTCN1;NMU;FGG;SYT4;PAEP;NOS2	structural molecule activity	11	0.0474274	ACTL6B;KRT36;CRYGD;LAMA1;MUC6;CROCC;KRT78;COL2A1;LIM2;KRT28;CLDN24	fibroblast growth factor receptor binding	2	0.0356692	FGF22;KLB	regulation of protein complex disassembly	5	0.00327048	SPTA1;ACTN2;LMOD2;SLN;TRIM54	Cefradine	2	0.00161314	CYP3A4;SLC22A6	Eszopiclone	2	0.0120938	GABRG2;GABRA1
endopeptidase activity	10	0.010072	KLK14;MMP13;CPS1;CAPN12;PRSS1;HPR;PROC;PRSS50;TMPRSS11A;TMPRSS6	spinal cord development	3	0.0485162	ACTL6B;OLIG2;MDGA2	Quinidine	2	0.0356692	ORM1;CYP1A1	protein depolymerization	5	0.00327048	SPTA1;ACTN2;LMOD2;SLN;TRIM54	Piperaquine	2	0.00161314	CYP3A4;CYP2B6	killing of cells of other organism	3	0.0123259	SEMG1;HTN3;NOS2
negative regulation of lymphocyte activation	5	0.0100981	PGLYRP4;TNFAIP8L2;SCGB1A1;VTCN1;PGLYRP1	negative regulation of blood pressure	2	0.0485579	APLN;BMPR2	Taurine	2	0.0356692	GLRA3;GABRA1	regulation of heart contraction	7	0.00330238	TRDN;CASQ1;MYH7;MYL2;APLN;CSRP3;RYR1	Imipramine	4	0.00171018	CYP3A4;CYP2B6;CHRM2;CHRM3	disruption of cells of other organism	3	0.0123259	SEMG1;HTN3;NOS2
lymphocyte activation	13	0.0101949	IGLL5;CR2;CD79A;PGLYRP4;IRF4;TNFAIP8L2;SCGB1A1;VTCN1;FUT7;MS4A1;HNF1A;PGLYRP1;CXCR5	negative regulation of smooth muscle cell proliferation	2	0.0485579	IL12A;APLN	receptor regulator activity	11	0.0358617	TG;CGA;IL16;AGT;FGF22;GRP;DKK4;UTS2B;IL25;AMBN;RLN1	hydrolase activity, acting on carbon-nitrogen (but not peptide) bonds, in cyclic amidines	3	0.00331434	AMPD1;ADAD2;APOBEC2	regulation of response to food	3	0.00175987	PRKCG;OPRM1;GHSR	inflammatory response	12	0.0126798	FABP4;IL22RA2;LBP;HPR;IL21;C2CD4B;NOS2;IL6;CD19;ACKR1;CXCL2;APOA2
negative regulation of lipase activity	2	0.0102052	APOA2;ANXA8	detection of chemical stimulus involved in sensory perception of taste	2	0.0485579	CST1;CST4	regulation of histone methylation	3	0.0359368	PRDM12;CTCFL;HIST1H1B	monovalent inorganic cation transport	12	0.00342094	FXYD4;KCNRG;KCNA7;HCN1;ACTN2;GALR2;ASIC5;COX6A2;SCN4A;OPRK1;SLC34A3;SLC17A8	Methadone	3	0.00175987	CYP3A4;CYP2B6;OPRM1	hormone secretion	7	0.0129239	MAFA;CARTPT;KCNA5;NOS2;IL6;FOXA2;FGA
regulation of glutamate secretion	2	0.0102052	GRM7;SYT4	histone exchange	2	0.0485579	TNP2;OIP5	camera-type eye morphogenesis	4	0.0360734	IRX5;PAX6;RS1;SDK1	divalent metal ion transport	11	0.00348763	TRDN;METTL21C;STAC3;EPO;CASQ1;DHRS7C;CAMK2A;SLN;GRIN3A;SLC30A8;RYR1	Promazine	3	0.00175987	CYP3A4;CHRM2;CHRM3	response to lipid	14	0.0130545	METTL21C;WNT9B;LBP;AICDA;SLPI;NPAS4;ANKRD1;NOS2;IL6;FOSB;S100A7;S100A14;CXCL2;APOA2
regulation of retinoic acid receptor signaling pathway	2	0.0102052	CRABP2;PRAME	protein processing	5	0.0486261	TNP2;APH1B;BIRC2;NKD2;C6	peptidase regulator activity	6	0.0361075	SPINK1;AGT;SERPIND1;SERPINA4;AHSG;DPEP1	transporter complex	9	0.00425551	FXYD4;KCNA7;HCN1;STAC3;SHISA8;HTR3B;GRIN3A;SCN4A;RYR1	Flunitrazepam	3	0.00175987	UGT1A1;CYP3A4;CYP2B6	endopeptidase regulator activity	5	0.0130933	SPINK2;LCN1;SLPI;SPINT3;SPOCK2
regulation of cytolysis	2	0.0102052	PGLYRP4;PGLYRP1	postsynapse	9	0.0490336	PCDH17;DAGLA;OPRM1;LRRTM2;CPLX2;SHISA8;OPRK1;HTR3B;BMPR2	protein homooligomerization	8	0.0374108	IGHMBP2;RS1;GLRA3;TDO2;PCBD2;TCL1A;ITLN1;KCNC2	tissue morphogenesis	13	0.00492898	MYLK2;BMPR2;MYOM3;ACTA1;MYH7;ANKRD1;TNNI1;MYL2;WNT4;GPC3;MYOM1;MYOM2;TTN	peptidase regulator activity	9	0.00176929	CST1;WFDC5;CST4;AGT;DPEP1;CST2;SMR3A;WFDC12;SERPIND1	organic acid transport	7	0.0131335	LCN1;FABP4;SLC16A12;NOS2;SLC6A5;MFSD2A;SYT4
HMG box domain binding	2	0.0102052	PAX6;PRRX1	fertilization	4	0.0499734	TNP2;TEX101;ZAN;CCDC87	inflammatory response	14	0.0378379	PLGRKT;UGT1A1;ORM1;AGT;PLA2G2A;CR2;TNFAIP8L2;XCR1;KRT1;PGLYRP1;CXCL17;PROC;AHSG;IL25	angiotensin-activated signaling pathway	2	0.00545047	ACTN2;CAMK2A	Amphetamine addiction	5	0.00183917	CALML5;PRKCG;GRIN2C;PRKACG;TH	carboxylic acid transport	7	0.0131335	LCN1;FABP4;SLC16A12;NOS2;SLC6A5;MFSD2A;SYT4
peptidoglycan binding	2	0.0102052	PGLYRP4;PGLYRP1					acid secretion	4	0.0381899	GRM7;PLA2G2A;NMU;SLC22A16	cellular chemical homeostasis	15	0.005881	TRDN;METTL21C;FPR1;EPO;GALR2;CASQ1;NEUROD1;DHRS7C;CSRP3;ACKR2;SLC30A8;OPRK1;RYR1;SLC34A3;WBP2NL	phenol-containing compound biosynthetic process	4	0.00187611	DBH;RAPGEF2;TH;INSM1	response to corticosterone	2	0.0132339	NPAS4;FOSB
regulation of cell killing	4	0.0104968	PGLYRP4;FCER2;PGLYRP1;NOS2					metalloendopeptidase activity	4	0.0381899	MMP13;PRSS2;LMLN;ECEL1	transcription coregulator activity	12	0.00599432	ACTL6B;BIRC2;ACTN2;VGLL2;SMYD1;NEUROD1;ANKRD1;HES7;WNT4;NEUROG3;MYOD1;WBP2NL	amine transport	6	0.00197152	AGT;VIP;TH;CHRNA3;GHSR;GRM7	cellular response to zinc ion	2	0.0132339	MT1A;MT1M
Amitriptyline	3	0.0111774	OPRD1;ORM1;HTR1D					regulation of fertilization	2	0.0382368	SPINK1;ZP2	Nicotine addiction	3	0.00624962	SLC32A1;GRIN3A;SLC17A8	catechol-containing compound biosynthetic process	3	0.00205086	DBH;TH;INSM1	positive regulation of mononuclear cell migration	2	0.0132339	S100A7;S100A14
peptide secretion	12	0.0111944	ORM1;FOXA2;CARTPT;APOA2;VTCN1;NMU;MIA2;FGG;SYT4;HNF1A;PAEP;NOS2					protein-lipid complex remodeling	2	0.0382368	AGT;PLA2G2A	regulation of skeletal muscle contraction	2	0.00640186	CASQ1;MYH7	catecholamine biosynthetic process	3	0.00205086	DBH;TH;INSM1	regulation of interleukin-13 production	2	0.0132339	PAEP;IRF4
serine-type endopeptidase inhibitor activity	4	0.0113329	SPINK1;SERPINA4;SPINK2;SPINT3					plasma lipoprotein particle remodeling	2	0.0382368	AGT;PLA2G2A	myosin heavy chain binding	2	0.00640186	AMPD1;MYL2	glycolipid binding	3	0.00205086	CEACAM5;DPEP1;LAMA1	GABA receptor activity	2	0.0132339	GABRG2;GABRA1
regulation of flagellated sperm motility	2	0.011493	SEMG2;SEMG1					oxidoreductase activity, acting on single donors with incorporation of molecular oxygen, incorporation of two atoms of oxygen	2	0.0382368	TDO2;ALOX12B	Tramadol	2	0.00640186	GRIN3A;OPRK1	Clotrimazole	3	0.00205086	CYP3A4;CYP2B6;CYP11B1	Clonazepam	2	0.0132339	GABRG2;GABRA1
ammonium transmembrane transport	2	0.011493	RHCG;RHBG					organic cation transmembrane transporter activity	2	0.0382368	SLC44A5;SLC22A16	molecular transducer activity	24	0.00649322	UNC5C;PTPRR;BMPR2;OR51B4;FPR1;KIR3DL1;GALR2;PAQR9;OR1A1;GPR25;GPR101;OXGR1;HTR3B;OR6K2;OR3A3;PRKAG3;CDKL3;ACKR2;GRIN3A;OR7C2;ITGB7;PKHD1L1;OPRK1;OR10G7	Ritonavir	3	0.00205086	UGT1A1;CYP3A4;CYP2B6	Nitrazepam	2	0.0132339	GABRG2;GABRA1
lipase inhibitor activity	2	0.011493	APOA2;SCGB1A1					Primidone	2	0.0382368	UGT1A1;GABRA1	plasma membrane protein complex	12	0.00660342	BIRC2;FXYD4;KCNA7;HCN1;STAC3;SHISA8;HTR3B;GRIN3A;SCN4A;APH1B;ITGB7;RYR1	Mibefradil	3	0.00205086	CACNA1I;CYP3A4;CYP11B1	negative regulation of peptidase activity	6	0.0133521	SPINK2;LCN1;SLPI;SPINT3;SPOCK2;PI16
Losartan	2	0.011493	UGT2B17;UGT2B7					Ketoconazole	2	0.0382368	UGT1A1;CYP1A1	cellular ion homeostasis	13	0.00667184	TRDN;METTL21C;FPR1;EPO;GALR2;CASQ1;DHRS7C;CSRP3;ACKR2;SLC30A8;RYR1;SLC34A3;WBP2NL	cell-cell signaling	34	0.00205922	DBH;DKK4;NOTUM;FGF3;RAPGEF2;SEZ6;GLRA3;IAPP;FGF4;AGT;SCEL;NETO1;CACNG3;GRID2;CPLX2;VIP;FFAR4;PRKCG;GHRHR;GRP;CHRM2;OPRM1;CHRM3;GRIN2C;KCNC2;TH;OR5T2;CHRNA3;SCGN;GHSR;SLC17A6;GRM7;PDX1;SLC2A2	cellular divalent inorganic cation homeostasis	9	0.014001	METTL21C;MT1A;SLC24A4;PVALB;CCKBR;CALB2;KCNA5;CD19;MT1M
regulation of complement activation	3	0.0118232	CR2;CD19;VTN					Carvedilol	2	0.0382368	UGT1A1;CYP1A1	cellular metal ion homeostasis	12	0.00669429	TRDN;METTL21C;FPR1;EPO;GALR2;CASQ1;DHRS7C;CSRP3;ACKR2;SLC30A8;RYR1;WBP2NL	feeding behavior	6	0.00207261	IAPP;AGT;OPRM1;ATP8A2;TH;GHSR	Copper	5	0.014009	MT1A;HBA1;HPR;MT1M;APOA2
intermediate filament	6	0.011843	KRT1;KRT24;KRT5;KRT16;GFAP;KRT81					channel activity	10	0.0385269	GLRA3;AQP10;GJA3;GRID2;CACNA2D2;CACNA1I;TMC1;OTOP3;GABRA1;KCNC2	response to ethanol	5	0.00724365	BIRC2;CA3;GOT2;GRIN3A;OPRK1	keratinization	9	0.00220639	LCE5A;ABCA12;KRT78;SPRR1B;KRTAP13-2;KRT20;KRTAP20-1;LIPN;KRTAP22-1	monocyte chemotaxis	3	0.0140581	IL6;S100A7;S100A14
chemical homeostasis	19	0.0121034	RHCG;FOXA2;CPS1;MT1HL1;PVALB;CD19;CARTPT;KRT1;PAX6;APOA2;PDK3;ABCB7;KRT16;NMU;XCR1;ATP12A;HNF1A;TMPRSS6;CXCR5					transporter complex	8	0.0385445	GLRA3;ATP12A;CNTNAP2;GRID2;CACNA2D2;CACNA1I;GABRA1;KCNC2	metal ion homeostasis	13	0.00738192	TRDN;METTL21C;BDH2;FPR1;EPO;GALR2;CASQ1;DHRS7C;CSRP3;ACKR2;SLC30A8;RYR1;WBP2NL	regulation of secretion by cell	19	0.00234765	CACNA1I;AGT;CPLX2;KRT20;VIP;FFAR4;PRKCG;GHRHR;GRP;CHRM2;OPRM1;KCNC2;CD244;CHRNA3;HMHB1;GHSR;GRM7;PDX1;SLC2A2	Desflurane	2	0.014419	GABRG2;GABRA1
steroid binding	4	0.0122108	GC;APOA2;UGT1A8;IRX5					passive transmembrane transporter activity	10	0.0390094	GLRA3;AQP10;GJA3;GRID2;CACNA2D2;CACNA1I;TMC1;OTOP3;GABRA1;KCNC2	tropomyosin binding	2	0.00742294	LMOD2;TNNT1	regulation of insulin-like growth factor receptor signaling pathway	3	0.00237006	GHRHR;GHSR;BMP5	Bromazepam	2	0.014419	GABRG2;GABRA1
regulation of protein activation cascade	3	0.01249	CR2;CD19;VTN					alpha-amino acid metabolic process	6	0.0397231	CPS1;TDO2;TAT;ART4;GLDC;DPEP1	inorganic ion homeostasis	14	0.00744488	TRDN;METTL21C;BDH2;FPR1;EPO;GALR2;CASQ1;DHRS7C;CSRP3;ACKR2;SLC30A8;RYR1;SLC34A3;WBP2NL	Zidovudine	3	0.00237006	UGT1A1;CYP3A4;SLC22A6	Quazepam	2	0.014419	GABRG2;GABRA1
response to chemokine	4	0.0126656	CXCL1;XCR1;CCL24;CXCR5					cellular response to ammonium ion	3	0.0403995	GABRA1;AOC1;KCNC2	regulation of calcium ion transmembrane transporter activity	4	0.00746902	TRDN;STAC3;CASQ1;SLN	Isavuconazole	3	0.00237006	CYP3A4;UGT1A8;CYP2B6	Stiripentol	2	0.014419	GABRG2;GABRA1
cellular response to chemokine	4	0.0126656	CXCL1;XCR1;CCL24;CXCR5					long-chain fatty acid biosynthetic process	2	0.0408728	CYP1A1;ALOX12B	ion channel complex	8	0.00759068	KCNA7;HCN1;STAC3;SHISA8;HTR3B;GRIN3A;SCN4A;RYR1	cAMP-mediated signaling	8	0.00237362	ADGRG7;RXFP1;RAPGEF2;IAPP;GPHA2;VIP;GHRHR;OPRM1	Tuberculosis	5	0.0146429	LBP;ATP6V0A4;ATP6V0D2;NOS2;IL6
regulation of acrosome reaction	2	0.0128481	SPINK1;ZP2					aromatic amino acid family catabolic process	2	0.0408728	TDO2;TAT	camera-type eye development	8	0.00788573	ATOH7;BMPR2;HCN1;NEUROD1;UNC45B;MYOM1;MYOM2;SLC17A8	adult behavior	7	0.00237602	DBH;SEZ6;OTOG;OPRM1;ADAM2;CHRNA3;GHSR	detection of stimulus involved in sensory perception	9	0.0148991	OR2T10;OR5M11;OR14I1;OR2T5;OR10G7;OR6K2;OR2T35;OR10H3;OR2AG1
transepithelial transport	2	0.0128481	RHCG;RHBG					oxidoreductase activity, acting on single donors with incorporation of molecular oxygen	2	0.0408728	TDO2;ALOX12B	second-messenger-mediated signaling	10	0.00797717	MYOZ2;TRDN;FPR1;GALR2;CASQ1;NEUROD1;DEFB1;GPR101;ACKR2;C10orf71	organic anion transport	14	0.00238096	SLCO1B7;PLA2G2A;SLC6A15;AGT;ABCA12;SLC38A11;SLC36A3;FOLR3;CA6;ATP8A2;SLC17A6;SLC22A6;GRM7;SLC2A2	response to cytokine	16	0.0150343	OPRD1;FABP4;IL22RA2;LBP;IRF4;GPD1;IL21;TNFRSF17;ANKRD1;SPOCK2;NOS2;IL6;FOXA2;TCL1A;ACKR1;CXCL2
detection of external biotic stimulus	2	0.0128481	PGLYRP4;PGLYRP1					Progesterone	2	0.0408728	ORM1;CYP1A1	Fostamatinib	8	0.00834439	MYLK2;MYLK3;BMPR2;MAP3K20;CAMK2A;CAMK1D;PRKAG3;SBK3	positive regulation of response to extracellular stimulus	2	0.00239915	OPRM1;GHSR	hormone transport	7	0.015132	MAFA;CARTPT;KCNA5;NOS2;IL6;FOXA2;FGA
spermatid development	5	0.0130784	SEMG2;SEMG1;SPINK1;SPINK2;PAEP					Ketamine	2	0.0408728	OPRD1;HTR1D	regulation of striated muscle contraction	4	0.00846145	CASQ1;MYH7;TNNI1;MYL2	positive regulation of response to nutrient levels	2	0.00239915	OPRM1;GHSR	granulocyte chemotaxis	4	0.0153955	LBP;S100A7;S100A14;CXCL2
immune response-activating signal transduction	10	0.0130844	IGLL5;CR2;CD79A;CD247;PGLYRP4;CD19;IRF4;VTCN1;FGG;PGLYRP1					cytoplasmic vesicle lumen	8	0.0408806	ORM1;SERPINA4;PRSS2;HSPA6;PGLYRP1;GRP;AHSG;AOC1	negative regulation of fibroblast growth factor receptor signaling pathway	2	0.00966869	APLN;WNT4	Doxycycline	2	0.00239915	CYP3A4;SLC22A6	serine-type endopeptidase activity	5	0.0156295	KLK14;GZMA;HPR;KLK13;PRSS1
epidermis development	10	0.0132696	KLK14;KRT1;PAX6;KRT24;KRT5;FOXQ1;KRT16;SOSTDC1;KRT81;CRABP2					vesicle lumen	8	0.041479	ORM1;SERPINA4;PRSS2;HSPA6;PGLYRP1;GRP;AHSG;AOC1	structural constituent of epidermis	2	0.00966869	KRT36;LOR	Tolmetin	2	0.00239915	TDO2;SLC22A6	interleukin-13 production	2	0.0156481	PAEP;IRF4
regulation of lyase activity	3	0.0138873	GRM3;GPR87;NOS2					complement activation	3	0.0435229	CR2;KRT1;IGLL5	ventricular cardiac muscle tissue morphogenesis	3	0.00977786	MYH7;TNNI1;MYL2	Benzquinamide	2	0.00239915	CHRM2;CHRM3	Clobazam	2	0.0156481	GABRG2;GABRA1
negative regulation of response to stimulus	24	0.0140467	FOXA2;KLK14;CBY3;SPINK1;AHSG;PGLYRP4;CARTPT;KRT1;APOA2;CXCL17;SEMA3A;IRF4;CNR2;TNFAIP8L2;VTN;SOSTDC1;FGG;TRAIP;PROC;PGLYRP1;SPINT3;TMPRSS6;IL22RA2;PRAME					regulation of macrophage derived foam cell differentiation	2	0.0435752	AGT;PLA2G2A	protein serine/threonine kinase activity	10	0.010136	MYLK2;MYLK3;BMPR2;MAP3K20;CAMK2A;CAMK1D;PRKAG3;SBK3;CDKL3;TTN	Oxcarbazepine	2	0.00239915	UGT1A1;CYP3A4	Flurazepam	2	0.0156481	GABRG2;GABRA1
cell recognition	5	0.014191	IGLL5;FUT3;ZP2;SEMA3A;PAEP					protein-containing complex remodeling	2	0.0435752	AGT;PLA2G2A	negative regulation of ion transport	5	0.0101429	TRDN;KCNRG;ACTN2;EPO;SLN	Diflunisal	2	0.00239915	UGT1A8;SLC22A6	germ cell development	6	0.0157248	SEMG2;SEMG1;SPINK2;PAEP;SYCP1;FAM9A
regulation of endopeptidase activity	9	0.014449	SEMG2;SEMG1;SPINK1;AHSG;ANXA8;SERPINA4;VTN;SPINK2;SPINT3					Indomethacin	2	0.0435752	UGT1A1;PLA2G2A	Dilated cardiomyopathy (DCM)	4	0.0103004	MYH7;MYL2;ITGB7;TTN	Metyrapone	2	0.00239915	CYP3A4;CYP11B1	secretory granule	13	0.0161122	OPRD1;SPINK2;KLK14;MGAM;ASTL;CARTPT;SLPI;LEFTY2;KLK13;TARM1;S100A7;FGA;SYT4
carbohydrate binding	7	0.0144922	ITLN1;ITLN2;KRT1;CLEC3A;LGALS9C;FCER2;VTN					anchored component of membrane	5	0.043926	GP2;ITLN1;ART4;RHBG;DPEP1	sodium ion transmembrane transport	5	0.0104406	FXYD4;HCN1;ASIC5;SCN4A;SLC34A3	Perhexiline	2	0.00239915	CYP3A4;CYP2B6	positive regulation of leukocyte migration	4	0.0162719	LBP;IL6;S100A7;S100A14
Hematopoietic cell lineage	4	0.0145927	CR2;CD19;FCER2;MS4A1					receptor ligand activity	10	0.0445945	TG;CGA;IL16;AGT;FGF22;GRP;UTS2B;IL25;AMBN;RLN1	cation channel activity	8	0.0105667	FXYD4;KCNA7;HCN1;ASIC5;HTR3B;GRIN3A;SCN4A;RYR1	Fosphenytoin	2	0.00239915	CYP3A4;CYP2B6	antimicrobial humoral immune response mediated by antimicrobial peptide	3	0.0165723	SEMG1;S100A7;CXCL2
regulation of peptide secretion	10	0.0148237	ORM1;FOXA2;CARTPT;APOA2;VTCN1;NMU;FGG;SYT4;PAEP;NOS2					cellular hormone metabolic process	4	0.0449589	UGT1A1;UGT1A8;CYP1A1;UGT2B11	retina development in camera-type eye	5	0.0107443	ATOH7;BMPR2;HCN1;NEUROD1;SLC17A8	Pancuronium	2	0.00239915	CHRM2;CHRM3	regulation of monocyte chemotaxis	2	0.0169205	S100A7;S100A14
secretory granule	15	0.0151108	OPRD1;ORM1;KLK14;AHSG;CARTPT;KRT1;SERPINA4;AOC1;CXCL1;SCGB1A1;SV2B;FGG;SYT4;PGLYRP1;SPINK2					neurotransmitter receptor activity	4	0.0449589	GLRA3;HTR1D;GRID2;GABRA1	muscle cell fate commitment	2	0.0108907	MYL2;MYOD1	Ospemifene	2	0.00239915	CYP3A4;CYP2B6	positive regulation of protein oligomerization	2	0.0169205	JCHAIN;TCL1A
receptor complex	9	0.0151119	FCRL5;ITLN1;CR2;GABRA1;CD79A;CD247;GABRG2;GABRP;GRM7					multi-organism behavior	3	0.0451286	CNTNAP2;GRP;GRPR	pseudopodium	2	0.0108907	KLHL41;ACTN2	Nalmefene	2	0.00239915	UGT1A8;OPRM1	gamma-aminobutyric acid signaling pathway	2	0.0169205	GABRG2;GABRA1
spermatid differentiation	5	0.0153655	SEMG2;SEMG1;SPINK1;SPINK2;PAEP					vasodilation	2	0.0463422	CPS1;AGT	Ketobemidone	2	0.0108907	GRIN3A;OPRK1	Aclidinium	2	0.00239915	CHRM2;CHRM3	T-helper 17 cell differentiation	2	0.0169205	IRF4;IL6
B cell receptor signaling pathway	3	0.0153699	IGLL5;CD79A;CD19					microvillus organization	2	0.0463422	RAP1GAP;RAPGEF2	positive regulation of ion transport	7	0.0111928	TRDN;STAC3;ACTN2;GALR2;CASQ1;CAMK2A;OPRK1	Homatropine	2	0.00239915	CHRM2;CHRM3	Enflurane	2	0.0169205	GABRG2;GABRA1
protein trimerization	3	0.0153699	ITLN1;CD247;TCL1A					cell maturation	5	0.0467899	IRX5;SPINK1;SEMG2;SEMG1;CNTNAP2	positive regulation of T cell proliferation	4	0.0115187	IL12A;SPTA1;EPO;PDCD1LG2	Thonzylamine	2	0.00239915	CHRM2;CHRM3	Temazepam	2	0.0169205	GABRG2;GABRA1
negative regulation of catalytic activity	14	0.0154271	FOXA2;SPINK1;GRM3;AHSG;APOA2;ANXA8;SERPINA4;CNR2;SCGB1A1;UGT1A8;VTN;GPR87;SPINK2;SPINT3					Glutamic Acid	3	0.0484273	GRM7;TAT;GRID2	regulation of actin filament depolymerization	3	0.0115798	SPTA1;ACTN2;LMOD2	Caspofungin	2	0.00239915	CYP3A4;SLC22A6	Acamprosate	2	0.0169205	GABRG2;GABRA1
chloride transmembrane transporter activity	4	0.015622	GABRA1;GABRG2;GABRP;GLRA3					sleep	2	0.0491719	NMU;CACNA1I	response to UV-B	2	0.0121769	IL12A;CRIP1	Artemether	2	0.00239915	CYP3A4;CYP2B6	Triazolam	2	0.0169205	GABRG2;GABRA1
copulation	2	0.015755	SEMG1;KLK14					natural killer cell activation involved in immune response	2	0.0491719	PGLYRP4;PGLYRP1	negative regulation of myotube differentiation	2	0.0121769	ANKRD2;TRIM72	Dasabuvir	2	0.00239915	CYP3A4;ABCB5	regulation of tissue remodeling	3	0.0172376	CARTPT;IL21;IL6
response to protozoan	2	0.015755	IRF4;VTCN1					regulation of natural killer cell activation	2	0.0491719	PGLYRP4;PGLYRP1	regulation of cardiac conduction	3	0.0122201	TRDN;CASQ1;RYR1	response to amine	4	0.00244029	DBH;GLDC;KCNC2;TH	multi-organism behavior	3	0.0179177	NPAS4;EN1;NRXN1
thyroid hormone metabolic process	2	0.015755	TG;DUOXA1					oxidoreductase activity, acting on paired donors, with incorporation or reduction of molecular oxygen, reduced flavin or flavoprotein as one donor, and incorporation of one atom of oxygen	2	0.0491719	CYP1A1;CYP4X1	T-tubule	3	0.0122201	CASQ1;GOT2;RYR1	signal release	14	0.00247778	AGT;CPLX2;VIP;FFAR4;PRKCG;GHRHR;GRP;CHRM2;OPRM1;KCNC2;CHRNA3;GHSR;PDX1;SLC2A2	T cell lineage commitment	2	0.0182354	IRF4;IL6
fucosylation	2	0.015755	FUT3;FUT7					Glycine	2	0.0491719	GLRA3;GLDC	positive regulation of protein depolymerization	2	0.0135262	ACTN2;SLN	molecular function regulator	38	0.00249897	CCNB3;CALML5;DKK4;AMBN;CST1;UGT1A1;WFDC5;FGF3;RAPGEF2;CST4;IAPP;FGF4;AGT;FGF22;CACNG3;UGT1A8;IRGM;DPEP1;CST2;COLEC10;GPHA2;VIP;IFNK;UTS2B;CHGB;PPY;SMR3A;GRP;WFDC12;KLB;SERPIND1;IL25;KCNV1;IFNA8;CLPSL1;BMP5;GRM7;CDC20B	high-density lipoprotein particle	2	0.0182354	HPR;APOA2
dense core granule	2	0.015755	OPRD1;SYT4					Nicotine	2	0.0491719	CYP1A1;CHAT	base conversion or substitution editing	2	0.0135262	ADAD2;APOBEC2	single fertilization	7	0.00257179	TEX101;FOLR3;TNP2;CATSPERD;ZAN;ADAM2;DAZ2	proton-transporting V-type ATPase complex	2	0.0182354	ATP6V0A4;ATP6V0D2
connexin complex	2	0.015755	GJA3;GJB4									DNA binding, bending	2	0.0135262	CRIP1;FOXD4	skin development	13	0.002605	DKK4;LCE5A;ABCA12;SCEL;KRT78;SPRR1B;KRTAP13-2;KRT20;KRTAP20-1;LIPN;ATP8A2;FLG2;KRTAP22-1	phosphatidylcholine binding	2	0.0182354	JCHAIN;APOA2
ankyrin binding	2	0.015755	RHCG;RHBG									actin filament depolymerization	3	0.0135605	SPTA1;ACTN2;LMOD2	cell-cell recognition	5	0.0026705	TEX101;FOLR3;CATSPERD;ZAN;ADAM2	quaternary ammonium group binding	2	0.0182354	JCHAIN;APOA2
signaling pattern recognition receptor activity	2	0.015755	PGLYRP4;PGLYRP1									regulation of muscle cell differentiation	5	0.0137533	ANKRD2;MYLK3;SMYD1;TRIM72;MYOD1	sensory perception of sound	7	0.00267421	OTOG;USH1C;BARHL1;COL2A1;POU4F2;TH;GRM7	Oxazepam	2	0.0182354	GABRG2;GABRA1
pattern recognition receptor activity	2	0.015755	PGLYRP4;PGLYRP1									response to interleukin-1	5	0.0137533	MYLK3;CCL16;EPO;ANKRD1;SLC30A8	nucleosome organization	7	0.00267421	TSPY2;PIWIL1;H2BFWT;TNP2;TSPYL6;HIST1H1B;PRDM9	Taurine	2	0.0182354	GABRG2;GABRA1
Mycophenolate mofetil	2	0.015755	UGT1A8;UGT2B7									cellular cation homeostasis	12	0.0140629	TRDN;METTL21C;FPR1;EPO;GALR2;CASQ1;DHRS7C;CSRP3;ACKR2;SLC30A8;RYR1;WBP2NL	1-phosphatidylinositol-3-kinase activity	4	0.00287521	FGF3;FGF4;FGF22;KLB	regulation of membrane potential	8	0.018457	OPRD1;GABRG2;NPAS4;GABRA1;KCNA5;GJD2;NRXN1;TCL1A
anterograde trans-synaptic signaling	13	0.0159248	GABRA1;GRM3;GABRG2;GABRP;CARTPT;GRM7;GLRA3;CNR2;HTR1D;SV2B;NMU;GFAP;SYT4									ventricular cardiac muscle tissue development	3	0.0142609	MYH7;TNNI1;MYL2	acetylcholine receptor activity	3	0.00309662	CHRM2;CHRM3;CHRNA3	response to toxic substance	9	0.0191422	OPRD1;MT1A;HBA1;PON3;KCNA5;IL6;CA3;GSTA1;MT1M
tertiary granule lumen	3	0.0161434	ORM1;CXCL1;PGLYRP1									neurotransmitter receptor complex	3	0.0142609	SHISA8;HTR3B;GRIN3A	Atorvastatin	3	0.00309662	UGT1A1;CYP3A4;CYP2B6	interleukin-8 production	3	0.0193222	LBP;NOS2;APOA2
Medical Cannabis	3	0.0161434	OPRD1;GLRA3;CNR2									ion homeostasis	14	0.0149787	TRDN;METTL21C;BDH2;FPR1;EPO;GALR2;CASQ1;DHRS7C;CSRP3;ACKR2;SLC30A8;RYR1;SLC34A3;WBP2NL	Rucaparib	3	0.00309662	UGT1A1;CYP3A4;SLC22A6	regulation of peptidase activity	8	0.0194275	SEMG2;SEMG1;SPINK2;LCN1;SLPI;SPINT3;SPOCK2;PI16
Nabiximols	3	0.0161434	OPRD1;GLRA3;CNR2									signaling receptor activity	22	0.0150398	UNC5C;PTPRR;BMPR2;OR51B4;FPR1;KIR3DL1;GALR2;PAQR9;OR1A1;GPR25;GPR101;OXGR1;HTR3B;OR6K2;OR3A3;ACKR2;GRIN3A;OR7C2;ITGB7;PKHD1L1;OPRK1;OR10G7	alcohol biosynthetic process	7	0.00323412	DBH;CYP3A4;PCBD2;IDI2;CYP11B1;CD244;BMP5	regulation of fertilization	2	0.0195921	PAEP;ASTL
amine transport	4	0.0166959	RHCG;CARTPT;GRM7;SYT4									neuropeptide signaling pathway	4	0.0152087	GALR2;GALP;OPRK1;NPW	positive regulation of interferon-gamma secretion	2	0.0033303	CD244;HMHB1	T-helper 17 type immune response	2	0.0195921	IRF4;IL6
neuropeptide signaling pathway	4	0.0166959	OPRD1;CARTPT;GLRA3;NMU									structural constituent of cytoskeleton	4	0.0152087	ACTL6B;SPTA1;ACTA1;LOR	noradrenergic neuron differentiation	2	0.0033303	PHOX2B;INSM1	NAD+ ADP-ribosyltransferase activity	2	0.0195921	ART3;PARP15
developmental maturation	7	0.0171094	SEMG2;SEMG1;SPINK1;IRX5;FGG;SYT4;PAEP									sodium ion transport	6	0.0155264	FXYD4;HCN1;ASIC5;SCN4A;SLC34A3;SLC17A8	anterior head development	2	0.0033303	COL2A1;BMP5	Glycosphingolipid biosynthesis	2	0.0195921	B3GNT3;FUT7
establishment of skin barrier	2	0.0173039	KRT1;KRT16									feeding behavior	4	0.0157165	GALR2;APLN;OPRK1;NPW	GPI anchor binding	2	0.0033303	CEACAM5;DPEP1	Collecting duct acid secretion	2	0.0195921	ATP6V0A4;ATP6V0D2
Arginine biosynthesis	2	0.0173039	CPS1;NOS2									identical protein binding	25	0.0160467	MEFV;OLIG2;OIP5;BIRC2;EXD1;KCNRG;EIF2B1;DUPD1;HCN1;MYOM3;STAC3;ACTN2;CASQ1;APOBEC2;DEFB1;CAMK2A;GSTO2;APLN;CSRP3;GOT2;MYOM1;GRIN3A;SLC30A8;ENO3;TTN	oxidoreductase activity, acting on paired donors, with incorporation or reduction of molecular oxygen, reduced pteridine as one donor, and incorporation of one atom of oxygen	2	0.0033303	PCBD2;TH	Primidone	2	0.0195921	GABRG2;GABRA1
trans-synaptic signaling	13	0.0173565	GABRA1;GRM3;GABRG2;GABRP;CARTPT;GRM7;GLRA3;CNR2;HTR1D;SV2B;NMU;GFAP;SYT4									multi-multicellular organism process	6	0.0172109	BMPR2;EPO;TNP2;WNT4;GOT2;FOSL1	Mexiletine	2	0.0033303	CYP3A4;CYP2B6	Sevoflurane	2	0.0195921	GABRG2;GABRA1
modification of morphology or physiology of other organism	5	0.0174643	SEMG1;PGLYRP4;FCER2;PGLYRP1;NOS2									positive regulation of striated muscle cell differentiation	3	0.017265	MYLK3;SMYD1;MYOD1	Carbachol	2	0.0033303	CHRM2;CHRM3	sarcomere	5	0.0200178	ANKRD2;ANKRD1;KCNA5;C10orf71;SYNPO2L
cell-cell signaling	24	0.0174923	FOXA2;CBY3;GABRA1;GRM3;GABRG2;GABRP;GJA3;CARTPT;RSPO4;GRM7;GLRA3;CNR2;HTR1D;SV2B;NMU;GFAP;FADS1;SOSTDC1;FGG;SYT4;HNF1A;CCL24;NOS2;BMP3									eye development	8	0.0176042	ATOH7;BMPR2;HCN1;NEUROD1;UNC45B;MYOM1;MYOM2;SLC17A8	Nitric Oxide	2	0.0033303	CYP3A4;CYP2B6	regulation of chemokine production	3	0.0200467	LBP;IL6;ACKR1
neuron projection membrane	3	0.0177551	OPRD1;GABRA1;GABRG2									visual system development	8	0.0178763	ATOH7;BMPR2;HCN1;NEUROD1;UNC45B;MYOM1;MYOM2;SLC17A8	Ivermectin	2	0.0033303	GLRA3;CYP3A4	positive regulation of chemotaxis	4	0.0206002	LBP;IL6;S100A7;S100A14
Cannabidiol	3	0.0177551	OPRD1;GLRA3;CNR2									cellular response to angiotensin	2	0.0179392	ACTN2;CAMK2A	Alfentanil	2	0.0033303	CYP3A4;OPRM1	interleukin-6 production	4	0.0206002	PAEP;LBP;NOS2;IL6
inorganic anion transmembrane transporter activity	5	0.0179058	GABRA1;GABRG2;GABRP;GLRA3;ABCC11									positive regulation of myoblast differentiation	2	0.0179392	SMYD1;MYOD1	Fentanyl	2	0.0033303	CYP3A4;OPRM1	CD4-positive, alpha-beta T cell differentiation	3	0.020786	IRF4;FUT7;IL6
skin development	9	0.0182459	KLK14;KRT1;PAX6;KRT24;KRT5;FOXQ1;KRT16;SOSTDC1;KRT81									microfilament motor activity	2	0.0179392	MYH7;MYH8	Disulfiram	2	0.0033303	DBH;CYP3A4	nitric oxide mediated signal transduction	2	0.0209899	MAFA;NOS2
cell killing	5	0.0183545	SEMG1;PGLYRP4;FCER2;PGLYRP1;NOS2									Long-term depression	3	0.0188893	PPP1R17;PLA2G4E;RYR1	Benzphetamine	2	0.0033303	CYP3A4;CYP2B6	Midazolam	2	0.0209899	GABRG2;GABRA1
cell activation	21	0.0186986	ORM1;IGLL5;CR2;CD79A;AHSG;PGLYRP4;KRT1;ZP2;AOC1;IRF4;CXCL1;CNR2;TNFAIP8L2;SCGB1A1;VTCN1;FUT7;FGG;MS4A1;HNF1A;PGLYRP1;CXCR5									sensory system development	8	0.0192827	ATOH7;BMPR2;HCN1;NEUROD1;UNC45B;MYOM1;MYOM2;SLC17A8	Levofloxacin	2	0.0033303	CYP3A4;SLC22A6	Isoflurane	2	0.0209899	GABRG2;GABRA1
retinoic acid metabolic process	2	0.0189147	UGT1A8;CRABP2									Calcium Phosphate	3	0.0197321	CASQ1;RYR1;SLC34A3	Prasugrel	2	0.0033303	CYP3A4;CYP2B6	Apalutamide	2	0.0209899	GABRG2;GABRA1
detection of biotic stimulus	2	0.0189147	PGLYRP4;PGLYRP1									negative regulation of potassium ion transmembrane transport	2	0.0211732	KCNRG;ACTN2	Armodafinil	2	0.0033303	CYP3A4;CYP2B6	myeloid leukocyte migration	5	0.021643	LBP;IL6;S100A7;S100A14;CXCL2
negative regulation of cyclase activity	2	0.0189147	GRM3;GPR87									response to muscle activity	2	0.0211732	PRKAG3;GOT2	Umeclidinium	2	0.0033303	CHRM2;CHRM3	digestion	4	0.0216491	MGAM;CCKBR;PRSS1;APOA2
receptor serine/threonine kinase binding	2	0.0189147	OPRD1;BMP3									neuropeptide binding	2	0.0211732	GALR2;OPRK1	Opium	2	0.0033303	CYP3A4;OPRM1	toll-like receptor signaling pathway	4	0.0216491	LBP;IRF4;FGA;S100A14
hormone metabolic process	6	0.0194844	CGA;TG;UGT1A8;DUOXA1;CRABP2;UGT2B7									positive regulation of Ras protein signal transduction	3	0.0214793	EPO;ABRA;SYNPO2L	Vinflunine	2	0.0033303	CYP3A4;ABCB5	positive regulation of defense response	8	0.021744	FABP4;LBP;IRF4;IL21;C2CD4B;IL6;FGA;S100A14
interferon-gamma production	4	0.0195794	PGLYRP4;SCGB1A1;VTCN1;PGLYRP1									response to alcohol	6	0.0221706	BIRC2;CA3;GOT2;GRIN3A;FOSL1;OPRK1	Pitolisant	2	0.0033303	CYP3A4;CYP2B6	anterograde trans-synaptic signaling	11	0.0219424	GABRG2;GRM3;CARTPT;NPAS4;CALB2;GABRA1;SLC6A5;GJD2;NRXN1;OR10H3;SYT4
immune response-regulating signaling pathway	10	0.0197991	IGLL5;CR2;CD79A;CD247;PGLYRP4;CD19;IRF4;VTCN1;FGG;PGLYRP1									response to other organism	15	0.0222066	IL12A;BIRC2;TRDN;IFNA6;CA3;LYPD8;EPO;BTBD17;DEFB1;GALP;ANKRD1;GPC3;FOSL1;PDCD1LG2;OPRK1	Atazanavir	2	0.0033303	UGT1A1;CYP3A4	alpha-beta T cell activation	4	0.0221857	IRF4;FUT7;TARM1;IL6
keratinization	6	0.019878	KLK14;KRT1;KRT24;KRT5;KRT16;KRT81									negative regulation of protein depolymerization	3	0.0223837	SPTA1;LMOD2;TRIM54	Ixazomib	2	0.0033303	CYP3A4;CYP2B6	positive regulation of B cell activation	3	0.0223091	IL21;IL6;IGLL5
positive regulation of immune response	13	0.0198894	IGLL5;CR2;CD79A;CD247;PGLYRP4;CD19;KRT1;IRF4;VTCN1;FCER2;VTN;FGG;PGLYRP1									response to angiotensin	2	0.0228741	ACTN2;CAMK2A	transmembrane transporter complex	11	0.00333333	CACNA1I;GLRA3;CACNG3;TRPC5;GRID2;ATP12A;CATSPERD;GRIN2C;KCNV1;KCNC2;CHRNA3	positive regulation of acute inflammatory response	2	0.0224279	C2CD4B;IL6
negative regulation of immune system process	9	0.0201177	PGLYRP4;CARTPT;APOA2;IRF4;CNR2;TNFAIP8L2;SCGB1A1;VTCN1;PGLYRP1									metal ion transmembrane transporter activity	9	0.0235497	FXYD4;KCNA7;HCN1;ASIC5;GRIN3A;SCN4A;SLC30A8;RYR1;SLC34A3	negative regulation of endopeptidase activity	9	0.00333699	CST1;WFDC5;CST4;AGT;DPEP1;CST2;SMR3A;WFDC12;SERPIND1	Methoxyflurane	2	0.0224279	GABRG2;GABRA1
Steroid hormone biosynthesis	3	0.0203348	UGT2B17;UGT1A8;UGT2B7									positive regulation of cell development	10	0.0239988	OLIG2;MYLK3;BMPR2;EPO;NEUROD1;CAMK1D;ANKRD1;NEUROG3;CDKL3;MYOD1	protein-lipid complex subunit organization	4	0.00336035	PLA2G2A;AGT;PCDHGA3;PRKACG	developmental maturation	6	0.0227219	SEMG2;SEMG1;PAEP;IL21;NRXN1;SYT4
regulation of water loss via skin	2	0.0205861	KRT1;KRT16									positive regulation of calcium ion transmembrane transport	3	0.024254	TRDN;STAC3;CASQ1	neuron migration	7	0.00348156	DRGX;IGSF10;RAPGEF2;FEZF2;BARHL1;PHOX2B;VAX1	granulocyte migration	4	0.023283	LBP;S100A7;S100A14;CXCL2
plasminogen activation	2	0.0205861	PLGRKT;FGG									intrinsic component of plasma membrane	24	0.0243629	TPBG;BIRC2;FXYD4;PCDH17;DAGLA;BMPR2;KCNA7;B3GNT3;SPTA1;HCN1;KIR3DL1;GALR2;SHISA8;GPR25;GPR101;HTR3B;GPC3;ACKR2;GRIN3A;SCN4A;APH1B;ITGB7;OPRK1;RYR1	benzene-containing compound metabolic process	3	0.00350561	TDO2;UGT1A1;TH	trans-synaptic signaling	11	0.0236493	GABRG2;GRM3;CARTPT;NPAS4;CALB2;GABRA1;SLC6A5;GJD2;NRXN1;OR10H3;SYT4
calcium-independent cell-cell adhesion via plasma membrane cell-adhesion molecules	2	0.0205861	CLDN2;CLDN9									cellular modified amino acid catabolic process	2	0.0246294	GGTLC2;GOT2	Cimetidine	3	0.00350561	CYP3A4;CYP11B1;SLC22A6	regulation of tyrosine phosphorylation of STAT protein	3	0.0238917	IL22RA2;IL21;IL6
glial cell projection	2	0.0205861	GFAP;SYT4									Maturity onset diabetes of the young	2	0.0246294	NEUROD1;NEUROG3	integral component of synaptic membrane	7	0.00387945	NETO1;CACNG3;GRID2;CHRM2;OPRM1;CHRM3;GHSR	respiratory burst	2	0.0239056	LBP;JCHAIN
C-C chemokine receptor activity	2	0.0205861	XCR1;CXCR5									response to bacterium	11	0.0252349	IL12A;TRDN;CA3;LYPD8;EPO;DEFB1;GALP;ANKRD1;GPC3;PDCD1LG2;OPRK1	negative regulation of steroid metabolic process	3	0.0039461	UGT1A1;UGT1A8;BMP5	proton-exporting ATPase activity	2	0.0239056	ATP6V0A4;ATP6V0D2
regulation of peptidase activity	9	0.0206772	SEMG2;SEMG1;SPINK1;AHSG;ANXA8;SERPINA4;VTN;SPINK2;SPINT3									cellular homeostasis	15	0.0263736	TRDN;METTL21C;FPR1;EPO;GALR2;CASQ1;NEUROD1;DHRS7C;CSRP3;ACKR2;SLC30A8;OPRK1;RYR1;SLC34A3;WBP2NL	type B pancreatic cell differentiation	3	0.0039461	INSM1;BMP5;PDX1	monovalent inorganic cation homeostasis	4	0.0244128	RHCG;ATP6V0A4;ATP6V0D2;KCNA5
leukocyte activation	19	0.020691	ORM1;IGLL5;CR2;CD79A;AHSG;PGLYRP4;KRT1;AOC1;IRF4;CXCL1;CNR2;TNFAIP8L2;SCGB1A1;VTCN1;FUT7;MS4A1;HNF1A;PGLYRP1;CXCR5									epithelial structure maintenance	2	0.0264379	NEUROD1;CROCC	regulation of response to nutrient levels	3	0.0039461	PRKCG;OPRM1;GHSR	regulation of peptide hormone secretion	5	0.0246894	CARTPT;KCNA5;NOS2;FOXA2;FGA
acid secretion	4	0.0220946	GRM7;NMU;SYT4;NOS2									actin monomer binding	2	0.0264379	MYL2;LMOD2	transporter complex	11	0.00400417	CACNA1I;GLRA3;CACNG3;TRPC5;GRID2;ATP12A;CATSPERD;GRIN2C;KCNV1;KCNC2;CHRNA3	adult locomotory behavior	3	0.0247052	OPRD1;EN1;FOXA2
inorganic anion transmembrane transport	4	0.0220946	GABRA1;GABRG2;GABRP;GLRA3									T cell proliferation	5	0.0277311	IL12A;SPTA1;EPO;WNT4;PDCD1LG2	integral component of postsynaptic membrane	6	0.00410618	NETO1;CACNG3;GRID2;CHRM2;OPRM1;CHRM3	peptidase activity, acting on L-amino acid peptides	10	0.0250133	CAPN12;KLK14;GZMA;HPR;RBP3;ASTL;KLK13;ADAMDEC1;CAPNS2;PRSS1
negative regulation of lyase activity	2	0.0223168	GRM3;GPR87									positive regulation of small GTPase mediated signal transduction	3	0.0282404	EPO;ABRA;SYNPO2L	Chemical carcinogenesis	5	0.00416363	UGT1A1;CYP3A4;UGT1A10;UGT1A8;UGT2B11	insulin secretion	5	0.025146	MAFA;CARTPT;KCNA5;NOS2;FOXA2
INO80-type complex	2	0.0223168	ACTR8;INO80E									monovalent inorganic cation transmembrane transporter activity	8	0.0282672	FXYD4;KCNA7;HCN1;SLC32A1;ASIC5;COX6A2;SCN4A;SLC34A3	response to bronchodilator	4	0.00418806	DBH;DPEP1;KCNC2;TH	gap junction	2	0.0254221	CALB2;GJD2
C-C chemokine binding	2	0.0223168	XCR1;CXCR5									nitric oxide mediated signal transduction	2	0.0282985	FPR1;NEUROD1	negative regulation of peptidase activity	9	0.00427644	CST1;WFDC5;CST4;AGT;DPEP1;CST2;SMR3A;WFDC12;SERPIND1	Pentobarbital	2	0.0254221	GABRG2;GABRA1
extracellular matrix	10	0.0227028	TGM4;ORM1;MMP13;AHSG;KRT1;ZP2;ANXA8;PRSS1;VTN;FGG									positive regulation of muscle cell apoptotic process	2	0.0282985	IL12A;CAMK2A	reproductive process	30	0.00431926	EPYC;CCNB3;DBH;TSPY2;TEX101;PIWIL1;AGT;DDX4;FOLR3;NME5;VIP;TNP2;CATSPERD;GHRHR;MAEL;ZAN;OPRM1;POU4F2;ADAM2;PRKACG;CCDC169-SOHLH2;DAZ2;TH;PSG6;GHSR;CCDC182;PRDM9;BMP5;CDX4;RAD21L1	regulation of defense response	11	0.0254517	FABP4;IL22RA2;LBP;IRF4;IL21;C2CD4B;NOS2;IL6;CD19;FGA;S100A14
regulation of protein processing	4	0.0227528	CR2;CD19;VTN;PLGRKT									Ketamine	2	0.0282985	GRIN3A;OPRK1	neurotransmitter loading into synaptic vesicle	2	0.00440274	TH;SLC17A6	phosphatidylcholine metabolic process	3	0.0255336	PLA2G4D;MFSD2A;APOA2
interleukin-2 production	3	0.0231097	CD247;IRF4;VTCN1									cardiac ventricle development	4	0.0289002	BMPR2;MYH7;TNNI1;MYL2	spermatogenesis, exchange of chromosomal proteins	2	0.00440274	PIWIL1;TNP2	chemokine production	3	0.0255336	LBP;IL6;ACKR1
endopeptidase inhibitor activity	5	0.023254	SPINK1;AHSG;SERPINA4;SPINK2;SPINT3									plasma membrane receptor complex	5	0.0300917	BIRC2;SHISA8;HTR3B;GRIN3A;ITGB7	Hydromorphone	2	0.00440274	CYP3A4;OPRM1	positive regulation of interleukin-6 production	3	0.0263768	PAEP;LBP;IL6
ammonium transport	4	0.0234228	RHCG;RHBG;SLC44A5;SYT4									negative regulation of calcium-mediated signaling	2	0.0302101	MYOZ2;TRDN	Cyproheptadine	2	0.00440274	CHRM2;CHRM3	tyrosine phosphorylation of STAT protein	3	0.0263768	IL22RA2;IL21;IL6
signaling receptor binding	23	0.0239895	OPRD1;ESM1;CGA;IGLL5;TG;LHFPL4;CARTPT;RSPO4;APOA2;SEMA3A;CXCL1;VTCN1;FCER2;VTN;NMU;GFAP;FGG;MS4A1;SPINT3;CCL24;PRAME;NOS2;BMP3									positive regulation of Rho protein signal transduction	2	0.0302101	ABRA;SYNPO2L	Chloramphenicol	2	0.00440274	CYP3A4;SLC22A6	cell-cell signaling	20	0.0264798	GABRG2;MAFA;WNT9B;GRM3;CARTPT;NPAS4;RSPO4;FCRL2;CALB2;GABRA1;KCNA5;NOS2;IL6;SLC6A5;GJD2;FOXA2;FGA;NRXN1;OR10H3;SYT4
regulation of protein maturation	4	0.0241048	CR2;CD19;VTN;PLGRKT									cardiac ventricle morphogenesis	3	0.0303562	MYH7;TNNI1;MYL2	Enalapril	2	0.00440274	CYP3A4;SLC22A6	secretory granule organization	2	0.0269768	SPINK2;SYT4
positive regulation of steroid metabolic process	2	0.0241053	CGA;APOA2									chemotaxis	11	0.0304467	UNC5C;IL12A;BMPR2;SPTA1;FPR1;CCL16;MYPN;DEFB1;CAMK1D;ACKR2;FOSL1	Clofibrate	2	0.00440274	CYP3A4;CYP2B6	organ or tissue specific immune response	2	0.0269768	NOS2;IL6
gamma-aminobutyric acid signaling pathway	2	0.0241053	GABRA1;GABRG2									taxis	11	0.03107	UNC5C;IL12A;BMPR2;SPTA1;FPR1;CCL16;MYPN;DEFB1;CAMK1D;ACKR2;FOSL1	Mitotane	2	0.00440274	CYP3A4;CYP11B1	regulation of pH	3	0.0272348	RHCG;ATP6V0A4;ATP6V0D2
hair follicle morphogenesis	2	0.0241053	FOXQ1;SOSTDC1									cardiac chamber morphogenesis	4	0.0311897	BMPR2;MYH7;TNNI1;MYL2	Modafinil	2	0.00440274	CYP3A4;CYP2B6	contractile fiber part	5	0.0275101	ANKRD2;ANKRD1;KCNA5;C10orf71;SYNPO2L
enzyme inhibitor activity	8	0.0244402	SPINK1;AHSG;APOA2;SERPINA4;SCGB1A1;UGT1A8;SPINK2;SPINT3									regulation of JAK-STAT cascade	4	0.0311897	IL12A;IFNA6;EPO;NEUROD1	Carbinoxamine	2	0.00440274	CYP3A4;CYP2B6	lipid localization	7	0.0277292	LCN1;FABP4;LBP;NOS2;IL6;MFSD2A;APOA2
Cytokine-cytokine receptor interaction	7	0.0244833	CXCL17;TNFRSF17;CXCL1;XCR1;CCL24;CXCR5;BMP3									regulation of fibroblast growth factor receptor signaling pathway	2	0.0321715	APLN;WNT4	Tetracycline	2	0.00440274	CYP3A4;SLC22A6	symporter activity	4	0.027999	SLC24A4;SLC16A12;SLC6A5;MFSD2A
ATPase activity, coupled to transmembrane movement of substances	4	0.0247986	ABCC12;ABCB7;ATP12A;ABCC11									Dextromethorphan	2	0.0321715	GRIN3A;OPRK1	Phenylbutazone	2	0.00440274	CYP3A4;SLC22A6	cytokine production	11	0.0280909	PAEP;CD247;FABP4;LBP;IRF4;ANKRD2;IL21;NOS2;IL6;ACKR1;APOA2
keratinocyte differentiation	7	0.0248813	KLK14;KRT1;PAX6;KRT24;KRT5;KRT16;KRT81									female pregnancy	5	0.0325754	BMPR2;EPO;WNT4;GOT2;FOSL1	Fenofibrate	2	0.00440274	UGT1A1;CYP3A4	response to drug	14	0.0284517	METTL21C;HBA1;SLC16A12;OTC;ANKRD1;KCNA5;NOS2;IL6;SLC6A5;FOSB;CA3;CD69;SYT4;APOA2
cell-cell adhesion	14	0.0251385	PCDHA10;CLDN2;PCDHA6;FOXA2;PCDHA4;PCDHGB5;PCDHA8;PCDHA11;TNFAIP8L2;SCGB1A1;VTCN1;CLDN9;FGG;PCDHA12									positive regulation of lymphocyte proliferation	4	0.0327737	IL12A;SPTA1;EPO;PDCD1LG2	Gemfibrozil	2	0.00440274	UGT1A1;CYP3A4	Diazepam	2	0.0285689	GABRG2;GABRA1
intermediate filament cytoskeleton	6	0.025496	KRT1;KRT24;KRT5;KRT16;GFAP;KRT81									positive regulation of mononuclear cell proliferation	4	0.0335831	IL12A;SPTA1;EPO;PDCD1LG2	Lumacaftor	2	0.00440274	CYP3A4;CYP2B6	Cell adhesion molecules (CAMs)	4	0.0286256	CLDN2;NCAM2;ICOS;NRXN1
negative regulation of amine transport	2	0.0259506	GRM7;SYT4									Gastric acid secretion	3	0.0336822	MYLK2;MYLK3;CAMK2A	Nevirapine	2	0.00440274	CYP3A4;CYP2B6	leukocyte chemotaxis	5	0.0295002	LBP;IL6;S100A7;S100A14;CXCL2
cellular response to copper ion	2	0.0259506	MT1HL1;AOC1									positive regulation of DNA-binding transcription factor activity	6	0.0336943	NEUROD1;CAMK2A;CAMK1D;NEUROG3;ABRA;FOSL1	Fluconazole	2	0.00440274	CYP3A4;CYP11B1	myofibril	5	0.0295002	ANKRD2;ANKRD1;KCNA5;C10orf71;SYNPO2L
high-density lipoprotein particle	2	0.0259506	APOA2;HPR									positive regulation of BMP signaling pathway	2	0.0341816	BMPR2;GPC3	Grepafloxacin	2	0.00440274	CYP3A4;SLC22A6	calcium ion homeostasis	8	0.0295264	METTL21C;SLC24A4;PVALB;CCKBR;CALB2;KCNA5;CD19;S100A14
chemokine receptor activity	2	0.0259506	XCR1;CXCR5									protein kinase A signaling	2	0.0341816	MYOM1;TTN	Benzyl alcohol	2	0.00440274	CYP3A4;CYP2B6	immune response-activating signal transduction	8	0.0298596	CD247;LBP;CD79A;IRF4;CD19;IGLL5;FGA;S100A14
cellular response to ammonium ion	3	0.0260801	GABRA1;GABRG2;AOC1									regulation of STAT cascade	4	0.0344042	IL12A;IFNA6;EPO;NEUROD1	Velpatasvir	2	0.00440274	CYP3A4;CYP2B6	mononuclear cell migration	3	0.0298975	IL6;S100A7;S100A14
neurotransmitter receptor activity	4	0.0262223	GABRA1;GABRG2;GLRA3;HTR1D									regulation of supramolecular fiber organization	7	0.0362304	MYLK3;SPTA1;ACTN2;WNT4;LMOD2;SYNPO2L;TRIM54	retinoic acid binding	3	0.00441879	UGT1A1;UGT1A10;UGT1A8	response to mineralocorticoid	2	0.0301978	NPAS4;FOSB
platelet alpha granule lumen	3	0.0271135	ORM1;AHSG;FGG									negative regulation of potassium ion transport	2	0.0362394	KCNRG;ACTN2	Maturity onset diabetes of the young	3	0.00441879	IAPP;PDX1;SLC2A2	neuron cellular homeostasis	2	0.0301978	CALB2;IL6
Retinol metabolism	3	0.0271135	UGT2B17;UGT1A8;UGT2B7									negative regulation of blood circulation	2	0.0362394	BMPR2;APLN	Sorafenib	3	0.00441879	UGT1A1;CYP3A4;CYP2B6	energy coupled proton transmembrane transport, against electrochemical gradient	2	0.0301978	ATP6V0A4;ATP6V0D2
peptidase inhibitor activity	5	0.0271436	SPINK1;AHSG;SERPINA4;SPINK2;SPINT3									positive regulation of myotube differentiation	2	0.0362394	SMYD1;MYOD1	Miconazole	3	0.00441879	CYP3A4;CYP2B6;CYP11B1	cell recognition	4	0.0305554	PAEP;ASTL;NCAM2;IGLL5
endopeptidase regulator activity	5	0.0271436	SPINK1;AHSG;SERPINA4;SPINK2;SPINT3									positive regulation of leukocyte proliferation	4	0.036937	IL12A;SPTA1;EPO;PDCD1LG2	reproduction	30	0.00445254	EPYC;CCNB3;DBH;TSPY2;TEX101;PIWIL1;AGT;DDX4;FOLR3;NME5;VIP;TNP2;CATSPERD;GHRHR;MAEL;ZAN;OPRM1;POU4F2;ADAM2;PRKACG;CCDC169-SOHLH2;DAZ2;TH;PSG6;GHSR;CCDC182;PRDM9;BMP5;CDX4;RAD21L1	negative regulation of DNA metabolic process	4	0.0305554	GZMA;AICDA;ZSCAN4;ANKRD1
glutamate receptor activity	2	0.0278513	GRM3;GRM7									Cardiac muscle contraction	3	0.0371897	MYH7;COX6A2;MYL2	negative regulation of proteolysis	11	0.00447546	CST1;WFDC5;C4BPB;CST4;AGT;DPEP1;CST2;PRKCG;SMR3A;WFDC12;SERPIND1	peptidase activity	10	0.0314388	CAPN12;KLK14;GZMA;HPR;RBP3;ASTL;KLK13;ADAMDEC1;CAPNS2;PRSS1
Glycosphingolipid biosynthesis	2	0.0278513	FUT3;FUT7									negative regulation of protein complex assembly	4	0.0378045	MEFV;BIRC2;SPTA1;LMOD2	phosphatidylinositol kinase activity	4	0.00449192	FGF3;FGF4;FGF22;KLB	keratinocyte differentiation	6	0.0315663	KLK14;KLK13;KRT24;KRTAP16-1;S100A7;KRTAP4-3
defense response to bacterium	6	0.0279124	SEMG2;SEMG1;IGLL5;PGLYRP4;PGLYRP1;NOS2									response to isoquinoline alkaloid	2	0.0383439	GOT2;OPRK1	amino acid transmembrane transport	5	0.0046145	SLC6A15;AGT;SLC38A11;SLC36A3;SLC17A6	keratinization	5	0.0315791	KLK14;KLK13;KRT24;KRTAP16-1;KRTAP4-3
regulation of immune system process	21	0.0296147	ORM1;IGLL5;CR2;CD79A;CD247;PGLYRP4;CD19;CARTPT;KRT1;APOA2;CXCL17;IRF4;CNR2;TNFAIP8L2;SCGB1A1;VTCN1;FCER2;VTN;FGG;PGLYRP1;CCL24									response to morphine	2	0.0383439	GOT2;OPRK1	phosphatidylinositol-3-phosphate biosynthetic process	4	0.00481029	FGF3;FGF4;FGF22;KLB	positive regulation of amine transport	2	0.0318628	CARTPT;SYT4
nitric oxide mediated signal transduction	2	0.0298062	SPINK1;NOS2									euchromatin	2	0.0383439	ANKRD2;TBP	axon terminus	6	0.00483682	CPLX2;PRKCG;CHRM2;CHRM3;KCNC2;TH	phosphatidylcholine biosynthetic process	2	0.0318628	MFSD2A;APOA2
regulation of interleukin-4 production	2	0.0298062	IRF4;SCGB1A1									intracellular ligand-gated ion channel activity	2	0.0383439	HCN1;RYR1	Insulin secretion	5	0.00485249	PRKCG;CHRM3;PRKACG;PDX1;SLC2A2	protein ADP-ribosylation	2	0.0318628	ART3;PARP15
Ketamine	2	0.0298062	OPRD1;HTR1D									protein homotetramerization	3	0.0383989	HCN1;ACTN2;RYR1	acetylcholine receptor signaling pathway	3	0.00492434	CHRM2;CHRM3;CHRNA3	intracellular pH reduction	2	0.0318628	ATP6V0A4;ATP6V0D2
P-P-bond-hydrolysis-driven transmembrane transporter activity	4	0.0299929	ABCC12;ABCB7;ATP12A;ABCC11									positive regulation of supramolecular fiber organization	5	0.0386215	MYLK3;ACTN2;WNT4;LMOD2;SYNPO2L	signal transduction involved in cellular response to ammonium ion	3	0.00492434	CHRM2;CHRM3;CHRNA3	positive regulation of embryonic development	2	0.0318628	DMRT2;FOXA2
response to bacterium	11	0.0301862	SEMG2;SEMG1;IGLL5;CPS1;PGLYRP4;CXCL1;CNR2;SCGB1A1;MS4A1;PGLYRP1;NOS2									motor activity	4	0.0386837	DYNLRB2;MYO18B;MYH7;MYH8	response to acetylcholine	3	0.00492434	CHRM2;CHRM3;CHRNA3	cellular zinc ion homeostasis	2	0.0318628	MT1A;MT1M
primary active transmembrane transporter activity	4	0.0307835	ABCC12;ABCB7;ATP12A;ABCC11									lymphocyte proliferation	6	0.0388588	IL12A;IFNA6;SPTA1;EPO;WNT4;PDCD1LG2	cellular response to acetylcholine	3	0.00492434	CHRM2;CHRM3;CHRNA3	positive T cell selection	2	0.0318628	IRF4;IL6
transmembrane transport	22	0.0308028	GC;RHCG;ITLN1;ABCC12;GABRA1;GABRG2;OTOP3;GABRP;CD19;GJA3;SLC16A14;RHBG;GLRA3;KCNK5;ABCB7;SV2B;SLC44A5;AQP10;ATP12A;ABCC11;HNF1A;SLC3A1									ion gated channel activity	7	0.0393228	KCNA7;HCN1;ASIC5;HTR3B;GRIN3A;SCN4A;RYR1	positive regulation of peptidyl-threonine phosphorylation	3	0.00492434	AZU1;TRPC5;IRGM	toll-like receptor 4 signaling pathway	2	0.0318628	LBP;S100A14
B cell receptor signaling pathway	3	0.0314633	CR2;CD79A;CD19									Focal adhesion	5	0.0400521	MYLK2;BIRC2;MYLK3;MYL2;ITGB7	enteroendocrine cell differentiation	3	0.00492434	INSM1;BMP5;PDX1	Prion diseases	2	0.0318628	NCAM2;IL6
Indomethacin	2	0.0318141	ABCC11;UGT2B7									mononuclear cell proliferation	6	0.0400712	IL12A;IFNA6;SPTA1;EPO;WNT4;PDCD1LG2	neuropeptide hormone activity	3	0.00492434	VIP;PPY;GRP	Prasterone	2	0.0318628	GABRG2;GABRA1
regulation of immune effector process	8	0.0322068	CR2;PGLYRP4;CD19;APOA2;IRF4;FCER2;VTN;PGLYRP1									neuromuscular synaptic transmission	2	0.0404938	MYLK2;STAC3	glutamate receptor activity	3	0.00492434	GRID2;GRIN2C;GRM7	metal ion homeostasis	10	0.0326137	METTL21C;MT1A;SLC24A4;PVALB;CCKBR;CALB2;KCNA5;CD19;S100A14;MT1M
negative regulation of cell differentiation	12	0.0322517	FOXA2;PGLYRP4;CARTPT;PAX6;SEMA3A;ASCL2;GFAP;SOSTDC1;SYT4;PGLYRP1;PAEP;PRAME									smooth endoplasmic reticulum	2	0.0404938	CASQ1;RYR1	Primidone	3	0.00492434	UGT1A1;CYP3A4;CYP2B6	cellular response to cadmium ion	2	0.0335632	MT1A;MT1M
adaptive immune response	8	0.0326347	IGLL5;CR2;CD79A;CD247;TNFRSF17;IRF4;VTCN1;FCER2									cardiac muscle hypertrophy	3	0.0408769	MYH7;CSRP3;TTN	Rifampicin	3	0.00492434	UGT1A1;CYP3A4;CYP2B6	plasma lipoprotein particle	2	0.0335632	HPR;APOA2
peptide hormone secretion	6	0.0331892	FOXA2;CARTPT;NMU;FGG;HNF1A;NOS2									defense response to Gram-negative bacterium	3	0.0421456	LYPD8;DEFB1;GALP	Regorafenib	3	0.00492434	UGT1A1;CYP3A4;CYP2B6	lipoprotein particle	2	0.0335632	HPR;APOA2
antigen receptor-mediated signaling pathway	5	0.0333828	IGLL5;CD79A;CD247;CD19;VTCN1									acrosome reaction	2	0.0426884	CCDC87;TNP2	keratinocyte differentiation	10	0.00509457	LCE5A;ABCA12;SCEL;KRT78;SPRR1B;KRTAP13-2;KRT20;KRTAP20-1;LIPN;KRTAP22-1	Propofol	2	0.0335632	GABRG2;GABRA1
positive regulation of interleukin-2 production	2	0.0338738	IRF4;VTCN1									positive regulation of protein complex disassembly	2	0.0426884	ACTN2;SLN	intrinsic component of postsynaptic density membrane	4	0.00514347	NETO1;CACNG3;GRID2;CHRM3	GABAergic synapse	3	0.0336538	GABRG2;GNGT1;GABRA1
Troglitazone	2	0.0338738	UGT1A8;UGT2B7									regulation of calcineurin-NFAT signaling cascade	2	0.0426884	MYOZ2;C10orf71	somatodendritic compartment	20	0.00524581	RAPGEF2;SEZ6;GLRA3;IAPP;CACNG3;TRPC5;GRID2;CPLX2;UNC5A;VIP;PRKCG;CHRM2;OPRM1;CHRM3;KCNC2;TH;OR5T2;CHRNA3;SCGN;GRM7	lymphocyte activation	10	0.0350559	CD79A;IRF4;AICDA;IL21;FUT7;TARM1;MS4A1;IL6;ICOS;IGLL5
dendrite	11	0.0345026	OPRD1;LHFPL4;GABRA1;GRM3;GABRG2;SEMA3A;GRM7;GLRA3;CNR2;HTR1D;SYT4									regulation of calcineurin-mediated signaling	2	0.0426884	MYOZ2;C10orf71	regulation of secretion	19	0.00537376	CACNA1I;AGT;CPLX2;KRT20;VIP;FFAR4;PRKCG;GHRHR;GRP;CHRM2;OPRM1;KCNC2;CD244;CHRNA3;HMHB1;GHSR;GRM7;PDX1;SLC2A2	mating	2	0.0352983	SEMG1;KLK14
platelet degranulation	4	0.0349202	ORM1;AHSG;SERPINA4;FGG									negative regulation of striated muscle cell differentiation	2	0.0426884	ANKRD2;TRIM72	cell projection part	30	0.00538019	STMN4;SEZ6;GLRA3;DNAI2;CACNG3;TRPC5;GRID2;USH1C;CPLX2;DPEP1;UNC5A;TAS2R43;RP1;CATSPERD;PRKCG;AKAP14;DNAH8;CHRM2;OPRM1;CHRM3;PRKACG;KCNC2;DRC1;ATP8A2;TH;LRRC30;OR5T2;CHRNA3;SCGN;GRM7	pH reduction	2	0.0352983	ATP6V0A4;ATP6V0D2
integrin binding	4	0.0349202	ESM1;FCER2;VTN;GFAP									Zonisamide	2	0.0426884	CA3;SCN4A	plasma membrane bounded cell projection part	30	0.00538019	STMN4;SEZ6;GLRA3;DNAI2;CACNG3;TRPC5;GRID2;USH1C;CPLX2;DPEP1;UNC5A;TAS2R43;RP1;CATSPERD;PRKCG;AKAP14;DNAH8;CHRM2;OPRM1;CHRM3;PRKACG;KCNC2;DRC1;ATP8A2;TH;LRRC30;OR5T2;CHRNA3;SCGN;GRM7	zinc ion homeostasis	2	0.0352983	MT1A;MT1M
cell-cell recognition	3	0.0349512	FUT3;ZP2;PAEP									Rho protein signal transduction	5	0.0430092	ECT2L;CAVIN4;ABRA;SYNPO2L;ARHGDIG	multicellular organism reproduction	20	0.00538474	DBH;TSPY2;PIWIL1;DDX4;FOLR3;NME5;VIP;TNP2;CATSPERD;GHRHR;MAEL;OPRM1;POU4F2;ADAM2;PRKACG;CCDC169-SOHLH2;DAZ2;TH;GHSR;RAD21L1	response to interleukin-6	2	0.0352983	IL6;FOXA2
dendritic tree	11	0.0352035	OPRD1;LHFPL4;GABRA1;GRM3;GABRG2;SEMA3A;GRM7;GLRA3;CNR2;HTR1D;SYT4									regulation of Rho protein signal transduction	4	0.0432548	ECT2L;CAVIN4;ABRA;SYNPO2L	nitric oxide mediated signal transduction	3	0.00546337	AGT;KCNC2;PDX1	contractile fiber	5	0.0354339	ANKRD2;ANKRD1;KCNA5;C10orf71;SYNPO2L
response to biotic stimulus	15	0.0352546	SEMG2;SEMG1;ITLN1;IGLL5;CPS1;PGLYRP4;EME1;IRF4;CXCL1;CNR2;SCGB1A1;VTCN1;MS4A1;PGLYRP1;NOS2									striated muscle hypertrophy	3	0.0434339	MYH7;CSRP3;TTN	neurotransmitter binding	4	0.00549176	GLRA3;GLDC;CHRM3;CHRNA3	B cell proliferation	3	0.0356196	CD79A;IL21;MS4A1
cellular chemical homeostasis	13	0.0353122	RHCG;FOXA2;MT1HL1;PVALB;CD19;CARTPT;PDK3;ABCB7;NMU;XCR1;ATP12A;TMPRSS6;CXCR5									gated channel activity	7	0.0442781	KCNA7;HCN1;ASIC5;HTR3B;GRIN3A;SCN4A;RYR1	Medical Cannabis	4	0.00549176	CACNA1I;GLRA3;CYP3A4;OPRM1	serine-type endopeptidase inhibitor activity	3	0.0356196	SPINK2;SLPI;SPINT3
retinoic acid receptor signaling pathway	2	0.0359842	CRABP2;PRAME									integral component of plasma membrane	22	0.0445728	TPBG;BIRC2;FXYD4;PCDH17;DAGLA;BMPR2;KCNA7;B3GNT3;HCN1;KIR3DL1;GALR2;SHISA8;GPR25;GPR101;HTR3B;ACKR2;GRIN3A;SCN4A;APH1B;ITGB7;OPRK1;RYR1	Nabiximols	4	0.00549176	CACNA1I;GLRA3;CYP3A4;OPRM1	Salivary secretion	3	0.0356196	HTN3;PRH2;ATP1B4
regulation of glial cell proliferation	2	0.0359842	ASCL2;GFAP									skeletal muscle tissue regeneration	2	0.0449264	ENO3;MYOD1	sympathetic ganglion development	2	0.00561272	PHOX2B;INSM1	Rheumatoid arthritis	3	0.0356196	ATP6V0A4;ATP6V0D2;IL6
natural killer cell activation involved in immune response	2	0.0359842	PGLYRP4;PGLYRP1									muscle hypertrophy	3	0.0460691	MYH7;CSRP3;TTN	cortisol metabolic process	2	0.00561272	CYP11B1;BMP5	plasma membrane protein complex	9	0.0356779	CD247;GNGT1;CD79A;CDH18;ATP6V0D2;KCNA5;IL6;GJD2;ATP1B4
regulation of natural killer cell activation	2	0.0359842	PGLYRP4;PGLYRP1									response to mechanical stimulus	5	0.0460946	ACTA1;ANKRD1;CSRP3;FOSL1;TTN	cortisol biosynthetic process	2	0.00561272	CYP11B1;BMP5	proteolysis	21	0.0357025	SEMG2;SEMG1;SPINK2;CAPN12;KLK14;LCN1;GZMA;HPR;RBP3;ACTR8;ASTL;SLPI;KLK13;SPINT3;SPOCK2;CD19;ADAMDEC1;CAPNS2;FGA;PRSS1;PI16
gap junction	2	0.0359842	GJA3;GJB4									mesenchyme migration	1	0.0461296	ACTA1	tertiary alcohol biosynthetic process	2	0.00561272	CYP11B1;BMP5	cellular metal ion homeostasis	9	0.036023	METTL21C;MT1A;SLC24A4;PVALB;CCKBR;CALB2;KCNA5;CD19;MT1M
protein processing	6	0.036055	CGA;CR2;CD19;VTN;PLGRKT;FGG									positive regulation of protein monoubiquitination	1	0.0461296	BIRC2	behavioral response to ethanol	2	0.00561272	DBH;OPRM1	modification of morphology or physiology of other organism	4	0.0360699	SEMG1;HTN3;SLPI;NOS2
secretory granule lumen	7	0.0363202	ORM1;AHSG;SERPINA4;AOC1;CXCL1;FGG;PGLYRP1									macrophage inflammatory protein-1 alpha production	1	0.0461296	MEFV	proline transport	2	0.00561272	SLC6A15;SLC36A3	Morphine addiction	3	0.0366244	GABRG2;GNGT1;GABRA1
nervous system process	20	0.036828	OPRD1;OR2T10;GABRA1;GABRG2;GABRP;GJA3;CARTPT;PAX6;GRM7;GLRA3;DNAH11;CNR2;GJB4;NMU;IRX5;OR5M11;SYT4;OR14I1;OR7D2;OR4K2									regulation of macrophage inflammatory protein 1 alpha production	1	0.0461296	MEFV	outer dynein arm	2	0.00561272	DNAI2;DNAH8	binding of sperm to zona pellucida	2	0.0370675	PAEP;ASTL
ion transport	23	0.0373292	OPRD1;SEMG1;RHCG;SPINK1;TG;GABRA1;GABRG2;CALHM3;OTOP3;GABRP;CD19;SLC16A14;APOA2;GRM7;RHBG;GLRA3;KCNK5;SLC44A5;ATP12A;ABCC11;SYT4;SLC3A1;NOS2									oligodendrocyte cell fate specification	1	0.0461296	OLIG2	ferric iron binding	2	0.00561272	FTHL17;TH	regulation of bone resorption	2	0.0370675	CARTPT;IL6
blood coagulation	7	0.0373635	FOXA2;KRT1;ANXA8;VTN;FGG;PROC;TMPRSS6									oligodendrocyte cell fate commitment	1	0.0461296	OLIG2	Oxycodone	2	0.00561272	CYP3A4;OPRM1	phospholipid catabolic process	2	0.0370675	PLA2G4D;APOA2
extracellular matrix disassembly	3	0.0373829	MMP13;PRSS1;TMPRSS6									glial cell fate specification	1	0.0461296	OLIG2	Atropine	2	0.00561272	CHRM2;CHRM3	ferric iron transport	2	0.0370675	ATP6V0A4;ATP6V0D2
glutamine family amino acid metabolic process	3	0.0373829	CPS1;TAT;NOS2									negative regulation of intrinsic apoptotic signaling pathway in response to osmotic stress	1	0.0461296	EPO	Dextropropoxyphene	2	0.00561272	CYP3A4;OPRM1	trivalent inorganic cation transport	2	0.0370675	ATP6V0A4;ATP6V0D2
secretory granule organization	2	0.0381439	SYT4;SPINK2									regulation of homophilic cell adhesion	1	0.0461296	PTPRR	Scopolamine	2	0.00561272	CHRM2;CHRM3	interleukin-6 secretion	2	0.0370675	PAEP;NOS2
chemokine binding	2	0.0381439	XCR1;CXCR5									tricuspid valve morphogenesis	1	0.0461296	BMPR2	Methimazole	2	0.00561272	CYP3A4;CYP2B6	protein-lipid complex	2	0.0370675	HPR;APOA2
negative regulation of cytokine production	6	0.0384589	ORM1;PGLYRP4;APOA2;SCGB1A1;TRAIP;PGLYRP1									retrograde trans-synaptic signaling by lipid	1	0.0461296	DAGLA	Norfloxacin	2	0.00561272	CYP3A4;SLC22A6	cell killing	4	0.0375326	SEMG1;HTN3;IL21;NOS2
pancreas development	3	0.0386305	FOXA2;PAX6;HNF1A									retrograde trans-synaptic signaling by endocannabinoid	1	0.0461296	DAGLA	Itraconazole	2	0.00561272	CYP3A4;CYP2B6	regulation of acute inflammatory response	3	0.0376436	C2CD4B;IL6;CD19
hemostasis	7	0.0400577	FOXA2;KRT1;ANXA8;VTN;FGG;PROC;TMPRSS6									positive regulation of skeletal muscle tissue regeneration	1	0.0461296	MYOD1	Acetylcholine	2	0.00561272	CHRM2;CHRM3	protein activation cascade	3	0.0376436	CD19;IGLL5;FGA
anion transmembrane transporter activity	7	0.0400577	GABRA1;GABRG2;GABRP;SLC16A14;GLRA3;ABCC11;SLC3A1									regulation of skeletal muscle contraction by regulation of release of sequestered calcium ion	1	0.0461296	CASQ1	Lorcaserin	2	0.00561272	CYP3A4;CYP2B6	epithelial cell differentiation	11	0.0378026	KLK14;WNT9B;RHCG;KLK13;TNMD;NEUROG3;KRT24;KRTAP16-1;S100A7;GSTA1;KRTAP4-3
regulation of amino acid transport	2	0.040352	GRM7;SYT4									hormone-mediated apoptotic signaling pathway	1	0.0461296	METTL21C	Methyltestosterone	2	0.00561272	CYP3A4;CYP2B6	cellular response to tumor necrosis factor	5	0.0383581	FABP4;GPD1;TNFRSF17;ANKRD1;TCL1A
eating behavior	2	0.040352	OPRD1;NMU									positive regulation of corticotropin secretion	1	0.0461296	APLN	Seratrodast	2	0.00561272	CYP3A4;CYP2B6	neutral lipid catabolic process	2	0.0388702	FABP4;APOA2
integral component of synaptic vesicle membrane	2	0.040352	OPRD1;SYT4									myoblast fate commitment	1	0.0461296	MYOD1	Cephalexin	2	0.00561272	CYP3A4;SLC22A6	acylglycerol catabolic process	2	0.0388702	FABP4;APOA2
extracellular structure organization	8	0.0410126	MMP13;APOA2;PRSS1;VTN;GFAP;FGG;MYH11;TMPRSS6									positive regulation of protein localization to cilium	1	0.0461296	CROCC	Voriconazole	2	0.00561272	CYP3A4;CYP2B6	frizzled binding	2	0.0388702	WNT9B;RSPO4
positive regulation of blood pressure	2	0.0426073	CARTPT;NMU									regulation of protein lipidation	1	0.0461296	HHATL	Amprenavir	2	0.00561272	CYP3A4;CYP2B6	Halothane	2	0.0388702	GABRG2;GABRA1
glutamate secretion	2	0.0426073	GRM7;SYT4									somatotropin secreting cell differentiation	1	0.0461296	WNT4	dendrite	16	0.00565874	SEZ6;GLRA3;CACNG3;TRPC5;GRID2;CPLX2;PRKCG;CHRM2;OPRM1;CHRM3;KCNC2;TH;OR5T2;CHRNA3;SCGN;GRM7	regulation of endopeptidase activity	7	0.0389715	SEMG2;SEMG1;SPINK2;LCN1;SLPI;SPINT3;SPOCK2
complement activation, classical pathway	2	0.0426073	IGLL5;CR2									positive regulation of the force of heart contraction	1	0.0461296	MYL2	epidermal cell differentiation	11	0.00566789	LCE5A;ABCA12;SCEL;KRT78;SPRR1B;KRTAP13-2;USH1C;KRT20;KRTAP20-1;LIPN;KRTAP22-1	apical plasma membrane	6	0.039246	AQP2;MGAM;RHCG;ATP6V0A4;ATP6V0D2;KCNA5
vitamin binding	4	0.0431418	GC;TAT;IRX5;CRABP2									metanephric mesenchymal cell differentiation	1	0.0461296	WNT4	intrinsic component of synaptic membrane	7	0.0058248	NETO1;CACNG3;GRID2;CHRM2;OPRM1;CHRM3;GHSR	regulation of astrocyte activation	1	0.0393859	IL6
cytokine production	12	0.0441159	ORM1;CD247;PGLYRP4;APOA2;CXCL17;IRF4;SCGB1A1;VTCN1;TRAIP;PGLYRP1;PAEP;NOS2									DNA double-strand break processing involved in repair via single-strand annealing	1	0.0461296	RNF138	dendritic tree	16	0.00583437	SEZ6;GLRA3;CACNG3;TRPC5;GRID2;CPLX2;PRKCG;CHRM2;OPRM1;CHRM3;KCNC2;TH;OR5T2;CHRNA3;SCGN;GRM7	regulation of very-low-density lipoprotein particle remodeling	1	0.0393859	APOA2
peptidase activity	11	0.0444144	KLK14;MMP13;CPS1;CAPN12;PRSS1;UNC5CL;HPR;PROC;PRSS50;TMPRSS11A;TMPRSS6									regulation of sequestering of zinc ion	1	0.0461296	SLC30A8	sensory perception of light stimulus	8	0.00584616	RS1;USH1C;CRYGD;RP1;COL2A1;POU6F2;ATP8A2;TH	arginine biosynthetic process	1	0.0393859	OTC
positive regulation of amine transport	2	0.0449087	CARTPT;SYT4									egg activation	1	0.0461296	WBP2NL	microtubule bundle formation	5	0.00589193	DNAI2;RP1;DNAH8;DRC1;DNAAF3	citrulline biosynthetic process	1	0.0393859	OTC
phosphatidylcholine biosynthetic process	2	0.0449087	APOA2;SLC44A5									RNA polymerase II transcription repressor complex	1	0.0461296	LIN52	Indomethacin	3	0.00603647	UGT1A1;PLA2G2A;SLC22A6	motor learning	1	0.0393859	EN1
acrosome reaction	2	0.0449087	SPINK1;ZP2									astrocyte end-foot	1	0.0461296	SLC17A8	Trimipramine	3	0.00603647	CYP3A4;CHRM2;CHRM3	nephric duct formation	1	0.0393859	WNT9B
salivary gland morphogenesis	2	0.0449087	PAX6;SEMA3A									creatine kinase activity	1	0.0461296	CKM	Aripiprazole	3	0.00603647	CYP3A4;CHRM2;CHRM3	negative regulation of glucokinase activity	1	0.0393859	FOXA2
core promoter sequence-specific DNA binding	2	0.0449087	POU2AF1;PAX6									serotonin-gated cation-selective channel activity	1	0.0461296	HTR3B	Aripiprazole lauroxil	3	0.00603647	CYP3A4;CHRM2;CHRM3	negative regulation of hexokinase activity	1	0.0393859	FOXA2
Chemical carcinogenesis	3	0.0451821	UGT2B17;UGT1A8;UGT2B7									gamma-aminobutyric acid transmembrane transporter activity	1	0.0461296	SLC32A1	cysteine-type endopeptidase inhibitor activity	4	0.00623487	CST1;CST4;DPEP1;CST2	hormone-mediated apoptotic signaling pathway	1	0.0393859	METTL21C
cytoplasmic vesicle lumen	7	0.0452213	ORM1;AHSG;SERPINA4;AOC1;CXCL1;FGG;PGLYRP1									Phenylalanine, tyrosine and tryptophan biosynthesis	1	0.0461296	GOT2	Cannabidiol	4	0.00623487	CACNA1I;GLRA3;CYP3A4;OPRM1	negative regulation of glucagon secretion	1	0.0393859	CARTPT
negative regulation of proteolysis	7	0.0458203	SPINK1;AHSG;ANXA8;SERPINA4;VTN;SPINK2;SPINT3									Sulpiride	1	0.0461296	CA3	epidermis development	13	0.00633402	CALML5;DKK4;LCE5A;ABCA12;SCEL;KRT78;SPRR1B;KRTAP13-2;USH1C;KRT20;KRTAP20-1;LIPN;KRTAP22-1	CD4-positive, CD25-positive, alpha-beta regulatory T cell differentiation	1	0.0393859	FUT7
vesicle lumen	7	0.0458203	ORM1;AHSG;SERPINA4;AOC1;CXCL1;FGG;PGLYRP1									Miglitol	1	0.0461296	MGAM	regulation of neurological system process	6	0.00633915	AGT;NETO1;VIP;SMR3A;OPRM1;GHSR	carbon catabolite regulation of transcription	1	0.0393859	FOXA2
ligand-gated channel activity	4	0.0461045	GABRA1;GABRG2;GABRP;GLRA3									Naltrexone	1	0.0461296	OPRK1	sensory system development	11	0.00654865	RS1;ABCB5;CRYGD;RP1;PRSS56;PHOX2B;POU4F2;ATP8A2;TH;VAX1;LAMA1	carbon catabolite activation of transcription	1	0.0393859	FOXA2
lipid binding	12	0.0464887	GC;CPS1;UGT2B17;APOA2;ANXA8;SYT16;UGT1A8;IRX5;SYT4;SCUBE2;CRABP2;UGT2B7									Nedocromil	1	0.0461296	FPR1	regulation of smooth muscle contraction	4	0.00663026	CHRM2;CHRM3;CHRNA3;GHSR	regulation of transcription by glucose	1	0.0393859	FOXA2
retinoid metabolic process	3	0.0465545	APOA2;UGT1A8;CRABP2									Flecainide	1	0.0461296	SCN4A	Olanzapine	4	0.00663026	UGT1A1;CYP3A4;CHRM2;CHRM3	negative regulation of interleukin-1-mediated signaling pathway	1	0.0393859	IL6
Taste transduction	3	0.0465545	GABRA1;KCNK5;HTR1D									Dihydromorphine	1	0.0461296	OPRK1	Ziprasidone	3	0.00664417	CYP3A4;CHRM2;CHRM3	respiratory burst involved in inflammatory response	1	0.0393859	LBP
lymphocyte differentiation	7	0.0470335	CR2;CD79A;PGLYRP4;IRF4;FUT7;HNF1A;PGLYRP1									2-Phosphoglycolic Acid	1	0.0461296	ENO3	Doxepin	3	0.00664417	CYP3A4;CHRM2;CHRM3	regulation of respiratory burst involved in inflammatory response	1	0.0393859	LBP
plasma lipoprotein particle	2	0.0472551	APOA2;HPR									Sucrose	1	0.0461296	ACTA1	DNA packaging	7	0.00682108	TSPY2;PIWIL1;H2BFWT;TNP2;TSPYL6;HIST1H1B;PRDM9	egg activation	1	0.0393859	ASTL
lipoprotein particle	2	0.0472551	APOA2;HPR									Sodium phosphate	1	0.0461296	SLC34A3	lipase activity	6	0.00682455	NOTUM;PLA2G2A;CHRM3;LIPN;LGALS13;CES3	alpha-beta T cell receptor complex	1	0.0393859	CD247
cellular response to heparin	1	0.0474221	AOC1									JAK-STAT cascade	4	0.0471216	IL12A;IFNA6;EPO;NEUROD1	regulation of interferon-gamma secretion	2	0.00695654	CD244;HMHB1	phosphatidylcholine-sterol O-acyltransferase activator activity	1	0.0393859	APOA2
regulation of eosinophil migration	1	0.0474221	CCL24									positive regulation of bone mineralization	2	0.0472069	BMPR2;WNT4	aldosterone metabolic process	2	0.00695654	CYP11B1;BMP5	NAD(P)+-protein-arginine ADP-ribosyltransferase activity	1	0.0393859	ART3
positive regulation of endothelial cell development	1	0.0474221	PROC									actin filament capping	2	0.0472069	SPTA1;LMOD2	aldosterone biosynthetic process	2	0.00695654	CYP11B1;BMP5	neuroligin family protein binding	1	0.0393859	NRXN1
positive regulation of establishment of endothelial barrier	1	0.0474221	PROC									porphyrin-containing compound metabolic process	2	0.0472069	BDH2;SPTA1	Erythromycin	2	0.00695654	CYP3A4;CYP2B6	interleukin-2 receptor binding	1	0.0393859	IL21
negative regulation of glutamate secretion	1	0.0474221	GRM7									positive regulation of neuron differentiation	7	0.0477962	BMPR2;EPO;NEUROD1;CAMK1D;ANKRD1;NEUROG3;CDKL3	Venlafaxine	2	0.00695654	CYP3A4;CYP2B6	calcium, potassium:sodium antiporter activity	1	0.0393859	SLC24A4
regulation of kidney size	1	0.0474221	HNF1A									cellular protein complex disassembly	5	0.0484934	SPTA1;ACTN2;LMOD2;SLN;TRIM54	Etodolac	2	0.00695654	UGT1A10;SLC22A6	Sulpiride	1	0.0393859	CA3
regulation of very-low-density lipoprotein particle remodeling	1	0.0474221	APOA2									positive regulation of muscle cell differentiation	3	0.0487817	MYLK3;SMYD1;MYOD1	Epinastine	2	0.00695654	CYP3A4;CYP2B6	Miglitol	1	0.0393859	MGAM
smooth muscle cell-matrix adhesion	1	0.0474221	VTN									regulation of actomyosin structure organization	3	0.0487817	MYLK3;WNT4;SYNPO2L	Clopidogrel	2	0.00695654	CYP3A4;CYP2B6	Naltrexone	1	0.0393859	OPRD1
oligodendrocyte cell fate specification	1	0.0474221	PAX6									inorganic molecular entity transmembrane transporter activity	13	0.0494015	FXYD4;KCNA7;HCN1;SLC32A1;ASIC5;COX6A2;HTR3B;GRIN3A;SCN4A;SLC30A8;RYR1;SLC34A3;SLC17A8	Naproxen	2	0.00695654	UGT1A1;SLC22A6	Iron Dextran	1	0.0393859	HBA1
oligodendrocyte cell fate commitment	1	0.0474221	PAX6									negative regulation of DNA biosynthetic process	2	0.049529	BMPR2;ANKRD1	Acetazolamide	2	0.00695654	CYP3A4;SLC22A6	Quinidine barbiturate	1	0.0393859	GABRA1
glial cell fate specification	1	0.0474221	PAX6									regulation of activated T cell proliferation	2	0.049529	EPO;PDCD1LG2	Ethinyl Estradiol	2	0.00695654	UGT1A1;CYP3A4	Dihydromorphine	1	0.0393859	OPRD1
citrulline biosynthetic process	1	0.0474221	CPS1									CCR chemokine receptor binding	2	0.049529	CCL16;DEFB1	Domperidone	2	0.00695654	CYP3A4;CYP2B6	S-Hydroxycysteine	1	0.0393859	GSTA1
negative regulation of synaptic vesicle exocytosis	1	0.0474221	SYT4									leukocyte proliferation	6	0.0499302	IL12A;IFNA6;SPTA1;EPO;WNT4;PDCD1LG2	Testosterone propionate	2	0.00695654	UGT1A1;CYP3A4	S-Hexylglutathione	1	0.0393859	GSTA1
dendrite arborization	1	0.0474221	SEMA3A													Axitinib	2	0.00695654	UGT1A1;CYP3A4	Andrographolide	1	0.0393859	IL6
negative regulation of glucokinase activity	1	0.0474221	FOXA2													Rilpivirine	2	0.00695654	CYP3A4;CYP2B6	Pentaerythritol Tetranitrate	1	0.0393859	HBA1
negative regulation of hexokinase activity	1	0.0474221	FOXA2													Enzalutamide	2	0.00695654	CYP3A4;CYP2B6	Vernakalant	1	0.0393859	KCNA5
hypoxia-inducible factor-1alpha signaling pathway	1	0.0474221	PDK3													Aminophenazone	2	0.00695654	CYP3A4;SLC22A6	clomethiazole	1	0.0393859	GABRA1
gastric emptying	1	0.0474221	NMU													Pibrentasvir	2	0.00695654	UGT1A1;CYP3A4	Triflusal	1	0.0393859	NOS2
regulation of gastric motility	1	0.0474221	NMU													Glecaprevir	2	0.00695654	UGT1A1;CYP3A4	Prothrombin	1	0.0393859	FGA
tyrosine catabolic process	1	0.0474221	TAT													amino acid transport	6	0.00707709	SLC6A15;AGT;SLC38A11;SLC36A3;SLC17A6;GRM7	negative regulation of endopeptidase activity	5	0.0395681	SPINK2;LCN1;SLPI;SPINT3;SPOCK2
positive regulation of humoral immune response mediated by circulating immunoglobulin	1	0.0474221	FCER2													natural killer cell activation involved in immune response	3	0.00728698	IFNK;IFNA8;CD244	side of membrane	8	0.039861	GNGT1;CD79A;MS4A1;CD19;ICOS;IGLL5;FGA;CD69
iodide transport	1	0.0474221	TG													Glycine	3	0.00728698	GLRA3;GLDC;GRIN2C	skeletal muscle tissue development	4	0.0405594	METTL21C;ANKRD2;ANKRD1;VGLL2
CD4-positive, CD25-positive, alpha-beta regulatory T cell differentiation	1	0.0474221	FUT7													Nicotine	3	0.00728698	CYP3A4;CYP2B6;CHRNA3	negative regulation of lipid localization	2	0.0407056	IL6;APOA2
regulation of thyroid hormone generation	1	0.0474221	DUOXA1													digestion	6	0.00733634	PGC;CHRM3;GHSR;CLPSL1;MUC6;SLC2A2	positive regulation of nucleotide biosynthetic process	2	0.0407056	GPD1;NOS2
carbon catabolite regulation of transcription	1	0.0474221	FOXA2													enzyme inhibitor activity	11	0.0073861	CST1;UGT1A1;WFDC5;CST4;AGT;UGT1A8;DPEP1;CST2;SMR3A;WFDC12;SERPIND1	positive regulation of purine nucleotide biosynthetic process	2	0.0407056	GPD1;NOS2
carbon catabolite activation of transcription	1	0.0474221	FOXA2													regulation of amine transport	5	0.00740009	AGT;VIP;CHRNA3;GHSR;GRM7	cytolysis	2	0.0407056	GZMA;LBP
regulation of transcription by glucose	1	0.0474221	FOXA2													hormone secretion	10	0.00745696	AGT;VIP;FFAR4;GHRHR;GRP;KCNC2;CHRNA3;GHSR;PDX1;SLC2A2	phosphatidic acid biosynthetic process	2	0.0407056	GPD1;PLA2G4D
regulation of binding of sperm to zona pellucida	1	0.0474221	PAEP													neural retina development	4	0.0074701	RS1;RP1;POU4F2;ATP8A2	synaptonemal complex	2	0.0407056	SYCP1;FAM9A
dichotomous subdivision of terminal units involved in salivary gland branching	1	0.0474221	SEMA3A													organic acid transport	10	0.00761853	SLCO1B7;PLA2G2A;SLC6A15;AGT;SLC38A11;SLC36A3;FOLR3;SLC17A6;SLC22A6;GRM7	synaptonemal structure	2	0.0407056	SYCP1;FAM9A
retinal bipolar neuron differentiation	1	0.0474221	IRX5													carboxylic acid transport	10	0.00761853	SLCO1B7;PLA2G2A;SLC6A15;AGT;SLC38A11;SLC36A3;FOLR3;SLC17A6;SLC22A6;GRM7	Nicotine addiction	2	0.0407056	GABRG2;GABRA1
substrate-dependent cerebral cortex tangential migration	1	0.0474221	SEMA3A													regulation of hormone secretion	9	0.00780416	AGT;VIP;GHRHR;GRP;KCNC2;CHRNA3;GHSR;PDX1;SLC2A2	Lamotrigine	2	0.0407056	GABRG2;GABRA1
trigeminal nerve morphogenesis	1	0.0474221	SEMA3A													Tretinoin	3	0.00796535	CYP3A4;CYP2B6;OBP2A	regulation of protein transport	10	0.0413639	PAEP;CARTPT;ANKRD1;KCNA5;NOS2;IL6;FOXA2;FGA;SYT4;APOA2
trigeminal nerve structural organization	1	0.0474221	SEMA3A													Quetiapine	3	0.00796535	CYP3A4;CHRM2;CHRM3	immune response-regulating signaling pathway	8	0.0415125	CD247;LBP;CD79A;IRF4;CD19;IGLL5;FGA;S100A14
trigeminal ganglion development	1	0.0474221	SEMA3A													Circadian entrainment	5	0.00807237	CALML5;CACNA1I;PRKCG;GRIN2C;PRKACG	phosphatidic acid metabolic process	2	0.0425733	GPD1;PLA2G4D
egg activation	1	0.0474221	ZP2													multicellular organismal homeostasis	13	0.00820735	DBH;CST4;IAPP;ABCA12;TFE3;USH1C;RP1;FFAR4;COL2A1;PHOX2B;PRKACG;FLG2;MUC6	presynapse assembly	2	0.0425733	CBLN2;NRXN1
alpha-beta T cell receptor complex	1	0.0474221	CD247													Ticlopidine	2	0.00843057	CYP3A4;CYP2B6	cellular polysaccharide metabolic process	3	0.0429553	HAS1;B3GNT3;MGAM
astrocyte end-foot	1	0.0474221	GFAP													Cyclophosphamide	2	0.00843057	CYP3A4;CYP2B6	Hematopoietic cell lineage	3	0.0429553	MS4A1;IL6;CD19
Holliday junction resolvase complex	1	0.0474221	EME1													Furosemide	2	0.00843057	UGT1A1;SLC22A6	bicarbonate transport	2	0.0444724	HBA1;CA3
phosphatidylcholine-sterol O-acyltransferase activator activity	1	0.0474221	APOA2													Methazolamide	2	0.00843057	CYP3A4;SLC22A6	cell-cell adhesion mediated by cadherin	2	0.0444724	CDH18;FOXA2
complement receptor activity	1	0.0474221	CR2													Flurbiprofen	2	0.00843057	UGT1A1;SLC22A6	alpha-beta T cell differentiation	3	0.046313	IRF4;FUT7;IL6
IgE binding	1	0.0474221	FCER2													Perphenazine	2	0.00843057	CYP3A4;CYP2B6	regulation of mononuclear cell migration	2	0.0464025	S100A7;S100A14
oxidoreductase activity, acting on paired donors, with oxidation of a pair of donors resulting in the reduction of molecular oxygen to two molecules of water	1	0.0474221	FADS1													Orphenadrine	2	0.00843057	CYP3A4;CYP2B6	presynapse organization	2	0.0464025	CBLN2;NRXN1
acrosin binding	1	0.0474221	ZP2													Ifosfamide	2	0.00843057	CYP3A4;CYP2B6	polysaccharide digestion	1	0.0470762	MGAM
Phenylalanine, tyrosine and tryptophan biosynthesis	1	0.0474221	TAT													Colchicine	2	0.00843057	CYP3A4;CYP2B6	negative regulation of cytokine secretion involved in immune response	1	0.0470762	APOA2
Calcitriol	1	0.0474221	GC													Phenacetin	2	0.00843057	CYP3A4;SLC22A6	regulation of intestinal cholesterol absorption	1	0.0470762	APOA2
Cystine	1	0.0474221	SLC3A1													Flunarizine	2	0.00843057	CACNA1I;CYP2B6	regulation of intestinal lipid absorption	1	0.0470762	APOA2
Epirubicin	1	0.0474221	UGT2B7													Capsaicin	2	0.00843057	DBH;CYP3A4	renal water transport	1	0.0470762	AQP2
Nabilone	1	0.0474221	CNR2													Lopinavir	2	0.00843057	CYP3A4;CYP2B6	peptide cross-linking via chondroitin 4-sulfate glycosaminoglycan	1	0.0470762	SPOCK2
Naltrexone	1	0.0474221	OPRD1													positive regulation of multicellular organism growth	3	0.00867973	GHRHR;ATP8A2;GHSR	mesenchymal stem cell maintenance involved in nephron morphogenesis	1	0.0470762	WNT9B
Suprofen	1	0.0474221	UGT2B7													cilium or flagellum-dependent cell motility	3	0.00867973	SPATA4;DNAH8;DRC1	membrane repolarization during atrial cardiac muscle cell action potential	1	0.0470762	KCNA5
Naratriptan	1	0.0474221	HTR1D													cilium-dependent cell motility	3	0.00867973	SPATA4;DNAH8;DRC1	positive regulation of T-helper 2 cell cytokine production	1	0.0470762	IL6
Rizatriptan	1	0.0474221	HTR1D													serotonin receptor activity	3	0.00867973	CHRM2;CHRM3;OR5T2	positive regulation of interleukin-13 secretion	1	0.0470762	PAEP
Quinidine barbiturate	1	0.0474221	GABRA1													multi-organism reproductive process	22	0.00883192	EPYC;TSPY2;TEX101;PIWIL1;AGT;DDX4;FOLR3;NME5;VIP;TNP2;CATSPERD;MAEL;ZAN;POU4F2;ADAM2;PRKACG;CCDC169-SOHLH2;DAZ2;TH;PSG6;GHSR;RAD21L1	negative regulation of fertilization	1	0.0470762	ASTL
Penbutolol	1	0.0474221	ORM1													Alcoholism	7	0.00892596	CALML5;HIST2H4B;HIST1H3C;HIST1H3I;H2BFWT;GRIN2C;TH	metanephric tubule formation	1	0.0470762	WNT9B
Dihydromorphine	1	0.0474221	OPRD1													hormone transport	10	0.00919731	AGT;VIP;FFAR4;GHRHR;GRP;KCNC2;CHRNA3;GHSR;PDX1;SLC2A2	neuronal dense core vesicle exocytosis	1	0.0470762	SYT4
clomethiazole	1	0.0474221	GABRA1													sensory organ development	14	0.00923575	RS1;ABCB5;USH1C;CRYGD;RP1;COL2A1;PRSS56;PHOX2B;POU4F2;ATP8A2;TH;VAX1;LAMA1;BMP5	presynaptic dense core vesicle exocytosis	1	0.0470762	SYT4
Triflusal	1	0.0474221	NOS2													regulation of dendrite development	6	0.00934674	RAPGEF2;SEZ6;TRPC5;CSMD3;CHRNA3;BMP5	uterus morphogenesis	1	0.0470762	WNT9B
regulation of cytokine production	11	0.0478231	ORM1;PGLYRP4;APOA2;CXCL17;IRF4;SCGB1A1;VTCN1;TRAIP;PGLYRP1;PAEP;NOS2													neuron projection terminus	6	0.00934674	CPLX2;PRKCG;CHRM2;CHRM3;KCNC2;TH	alpha-glucosidase activity	1	0.0470762	MGAM
adult behavior	4	0.0481413	OPRD1;FOXA2;GABRG2;CARTPT													insulin-like growth factor receptor signaling pathway	3	0.00943049	GHRHR;GHSR;BMP5	apolipoprotein receptor binding	1	0.0470762	APOA2
regulation of reproductive process	4	0.0481413	SPINK1;ZP2;SEMA3A;PAEP													steroid hydroxylase activity	3	0.00943049	CYP3A4;CYP2B6;CYP11B1	glycerol transmembrane transporter activity	1	0.0470762	AQP2
regulation of proteolysis	12	0.0485326	SEMG2;SEMG1;CR2;SPINK1;AHSG;CD19;ANXA8;SERPINA4;VTN;PLGRKT;SPINK2;SPINT3													Nortriptyline	3	0.00943049	CYP3A4;CHRM2;CHRM3	arylesterase activity	1	0.0470762	PON3
regulation of peptide hormone secretion	5	0.0491962	FOXA2;CARTPT;NMU;FGG;NOS2													cilium	15	0.00981363	DNAI2;USH1C;NME5;SPATA4;GPR83;TAS2R43;RP1;CATSPERD;SNTN;AKAP14;DNAH8;PRKACG;DRC1;ATP8A2;LRRC30	NADPH-hemoprotein reductase activity	1	0.0470762	NOS2
transferase activity, transferring hexosyl groups	5	0.0491962	FUT3;UGT2B17;UGT1A8;FUT7;UGT2B7													cornified envelope	4	0.00986824	LCE5A;SCEL;SPRR1B;FLG2	Ethoxzolamide	1	0.0470762	CA3
natural killer cell activation	3	0.0493607	PGLYRP4;HNF1A;PGLYRP1													smooth muscle contraction	5	0.00993623	AGT;CHRM2;CHRM3;CHRNA3;GHSR	Sucralfate	1	0.0470762	FGA
mating	2	0.0496454	SEMG1;KLK14													primary alcohol biosynthetic process	2	0.0100313	CYP11B1;BMP5	Dorzolamide	1	0.0470762	CA3
response to interleukin-6	2	0.0496454	FOXA2;FGG													sperm chromatin condensation	2	0.0100313	PIWIL1;TNP2	Zaleplon	1	0.0470762	GABRA1
Primary immunodeficiency	2	0.0496454	CD79A;CD19													Celecoxib	2	0.0100313	CYP3A4;ABCB5	Diclofenamide	1	0.0470762	CA3
																Ondansetron	2	0.0100313	CYP3A4;OPRM1	Brinzolamide	1	0.0470762	CA3
																Selegiline	2	0.0100313	CYP3A4;CYP2B6	Etorphine	1	0.0470762	OPRD1
																Diphenhydramine	2	0.0100313	CYP2B6;CHRM2	Ganaxolone	1	0.0470762	GABRA1
																Romidepsin	2	0.0100313	CYP3A4;CYP2B6	Nalmefene	1	0.0470762	OPRD1
																Gavestinel	2	0.0100313	UGT1A1;GRIN2C	Eluxadoline	1	0.0470762	OPRD1
																Zalcitabine	2	0.0100313	CYP3A4;SLC22A6	Gabexate	1	0.0470762	PRSS1
																Asunaprevir	2	0.0100313	CYP3A4;CYP2B6	Busulfan	1	0.0470762	GSTA1
																Idelalisib	2	0.0100313	CYP3A4;CYP2B6	amine transport	3	0.0474603	RHCG;CARTPT;SYT4
																sexual reproduction	19	0.0100583	TSPY2;TEX101;PIWIL1;DDX4;FOLR3;NME5;VIP;TNP2;CATSPERD;MAEL;ZAN;POU4F2;ADAM2;PRKACG;CCDC169-SOHLH2;DAZ2;TH;GHSR;RAD21L1	protein dimerization activity	16	0.0476801	CD247;MAFA;GZMA;CD79A;GPD1;DMRT2;PVALB;CDH18;NPAS4;NEUROG3;PON3;NOS2;JCHAIN;CD69;SYT4;APOA2
																oxygen binding	3	0.010218	TDO2;CYP3A4;TH	skeletal muscle organ development	4	0.0478638	METTL21C;ANKRD2;ANKRD1;VGLL2
																neuronal cell body	13	0.0106616	RAPGEF2;SEZ6;GLRA3;IAPP;TRPC5;CPLX2;UNC5A;VIP;CHRM2;OPRM1;KCNC2;TH;CHRNA3	cell maturation	4	0.0478638	SEMG2;SEMG1;PAEP;IL21
																Long-term potentiation	4	0.0109521	CALML5;PRKCG;GRIN2C;PRKACG	regulation of bone remodeling	2	0.0483629	CARTPT;IL6
																water homeostasis	4	0.0115217	ABCA12;GHRHR;PRKACG;FLG2	Carbohydrate digestion and absorption	2	0.0483629	MGAM;ATP1B4
																regulation of growth hormone secretion	2	0.0117551	GHRHR;GHSR	feeding behavior	3	0.0486216	OPRD1;CARTPT;EN1
																positive regulation of striated muscle cell apoptotic process	2	0.0117551	AGT;POU4F2	Chagas disease (American trypanosomiasis)	3	0.0486216	CD247;NOS2;IL6
																positive regulation of cardiac muscle cell apoptotic process	2	0.0117551	AGT;POU4F2	positive regulation of cell-cell adhesion	5	0.0486873	IL21;IL6;ICOS;FOXA2;FGA
																low-density lipoprotein particle remodeling	2	0.0117551	PLA2G2A;AGT	cellular response to lipid	9	0.0491567	METTL21C;WNT9B;LBP;AICDA;NPAS4;ANKRD1;NOS2;IL6;CXCL2
																response to light intensity	2	0.0117551	RS1;KCNC2	cellular response to oxygen-containing compound	14	0.0492253	AQP2;METTL21C;WNT9B;LBP;GPD1;AICDA;NPAS4;ANKRD1;ATP6V0A4;ATP6V0D2;NOS2;IL6;FOXA2;CXCL2
																positive regulation of insulin-like growth factor receptor signaling pathway	2	0.0117551	GHRHR;GHSR	transcription regulatory region sequence-specific DNA binding	11	0.0492959	ETV4;MAFA;IRF4;DMRT2;POU2AF1;FOXI1;NPAS4;EN1;NEUROG3;FOSB;FOXA2
																mineralocorticoid biosynthetic process	2	0.0117551	CYP11B1;BMP5	secretory vesicle	13	0.0495728	OPRD1;SPINK2;KLK14;MGAM;ASTL;CARTPT;SLPI;LEFTY2;KLK13;TARM1;S100A7;FGA;SYT4
																mineralocorticoid metabolic process	2	0.0117551	CYP11B1;BMP5	positive regulation of peptidyl-serine phosphorylation	3	0.0497968	OPRD1;IL6;TCL1A
																chromatoid body	2	0.0117551	PIWIL1;MAEL
																Cholecalciferol	2	0.0117551	CYP3A4;CYP2B6
																Atomoxetine	2	0.0117551	CYP3A4;GRIN2C
																Ranitidine	2	0.0117551	CYP3A4;SLC22A6
																Azelastine	2	0.0117551	CYP3A4;CYP2B6
																Ketoprofen	2	0.0117551	UGT1A1;SLC22A6
																Sulfinpyrazone	2	0.0117551	CYP3A4;CYP2B6
																Chlorprothixene	2	0.0117551	CHRM2;CHRM3
																Topiroxostat	2	0.0117551	CYP3A4;SLC22A6
																Dabrafenib	2	0.0117551	CYP3A4;SLC22A6
																Curcumin	2	0.0117551	CYP3A4;CYP2B6
																Indinavir	2	0.0117551	UGT1A1;CYP3A4
																axoneme part	3	0.0119045	DNAI2;DNAH8;DRC1
																chromatin DNA binding	5	0.0120762	FEZF2;HIST1H1B;VAX1;INSM1;PRDM9
																cell recognition	6	0.0120941	TEX101;FEZF2;FOLR3;CATSPERD;ZAN;ADAM2
																postsynapse	15	0.0121325	SEZ6;GLRA3;NETO1;CACNG3;GRID2;CPLX2;PRKCG;CHRM2;OPRM1;CHRM3;GRIN2C;KCNC2;CHRNA3;GHSR;GRM7
																neuromuscular process	5	0.0125389	GRID2;USH1C;GRIN2C;POU4F2;ATP8A2
																binding of sperm to zona pellucida	3	0.0128041	TEX101;ZAN;ADAM2
																serotonin receptor signaling pathway	3	0.0128041	CHRM2;CHRM3;OR5T2
																phosphatidylinositol-4,5-bisphosphate 3-kinase activity	4	0.0133434	FGF3;FGF4;FGF22;KLB
																Folic Acid	2	0.0135988	FOLR3;SLC22A6
																Fluvoxamine	2	0.0135988	CYP3A4;CYP2B6
																Citalopram	2	0.0135988	CYP3A4;CYP2B6
																Thiopental	2	0.0135988	CYP3A4;CHRM3
																Cisapride	2	0.0135988	CYP3A4;CYP2B6
																Propiomazine	2	0.0135988	CHRM2;CHRM3
																Sertraline	2	0.0135988	CYP3A4;CYP2B6
																Vortioxetine	2	0.0135988	CYP3A4;CYP2B6
																Benidipine	2	0.0135988	CACNA1I;CYP3A4
																Baricitinib	2	0.0135988	CYP3A4;SLC22A6
																C21-steroid hormone metabolic process	3	0.0137416	DHRS2;CYP11B1;BMP5
																transmission of nerve impulse	4	0.013989	CACNA1I;AGT;CACNG3;GHSR
																monocarboxylic acid binding	4	0.013989	UGT1A1;UGT1A10;UGT1A8;FFAR4
																learning or memory	8	0.0140836	DBH;AGT;NETO1;VIP;PRKCG;ADAM2;TH;GHSR
																cellular process involved in reproduction in multicellular organism	10	0.0143707	PIWIL1;DDX4;FOLR3;NME5;TNP2;CATSPERD;MAEL;ADAM2;CCDC169-SOHLH2;DAZ2
																response to nitrogen compound	22	0.01455	TDO2;DBH;RAPGEF2;GLRA3;AGT;GLDC;DPEP1;PRKCG;GHRHR;IFNK;CYP11B1;CHRM2;OPRM1;CHRM3;POU4F2;PRKACG;KCNC2;TH;IFNA8;CHRNA3;GHSR;SLC22A6
																amino acid transmembrane transporter activity	4	0.0146541	SLC6A15;SLC38A11;SLC36A3;SLC17A6
																regulation of sensory perception of pain	3	0.0147171	VIP;SMR3A;OPRM1
																regulation of peptidyl-threonine phosphorylation	3	0.0147171	AZU1;TRPC5;IRGM
																Clozapine	3	0.0147171	CYP3A4;CHRM2;CHRM3
																Lamotrigine	3	0.0147171	UGT1A1;CHRM2;CHRM3
																phosphatidylinositol bisphosphate kinase activity	4	0.0153389	FGF3;FGF4;FGF22;KLB
																vascular process in circulatory system	6	0.0153661	DBH;AZU1;AGT;VIP;UTS2B;CHRM3
																eye development	10	0.0154567	RS1;ABCB5;CRYGD;RP1;PRSS56;POU4F2;ATP8A2;TH;VAX1;LAMA1
																neuron projection	26	0.0154797	STMN4;RAPGEF2;SEZ6;GLRA3;CACNG3;TRPC5;GRID2;USH1C;CPLX2;UNC5A;RP1;VIP;PRKCG;CHRM2;OPRM1;CHRM3;KCNC2;ATP8A2;TH;LRRC30;OR5T2;CHRNA3;SCGN;GHSR;SLC17A6;GRM7
																negative regulation of dendrite morphogenesis	2	0.0155588	RAPGEF2;TRPC5
																nucleosome positioning	2	0.0155588	HIST1H1B;PRDM9
																glycine binding	2	0.0155588	GLRA3;GLDC
																regulation of sensory perception	3	0.0157309	VIP;SMR3A;OPRM1
																Verapamil	3	0.0157309	CACNA1I;CYP3A4;CYP2B6
																visual system development	10	0.0157375	RS1;ABCB5;CRYGD;RP1;PRSS56;POU4F2;ATP8A2;TH;VAX1;LAMA1
																Gastric acid secretion	4	0.0160435	CALML5;PRKCG;CHRM3;PRKACG
																axoneme	5	0.0161168	DNAI2;RP1;AKAP14;DNAH8;DRC1
																transmembrane transporter activity	22	0.0162425	SLCO1B7;CACNA1I;SLC6A15;GLRA3;ABCA12;CACNG3;TRPC5;GRID2;ABCB5;SLC38A11;SLC36A3;ATP12A;ASIC5;OPRM1;GRIN2C;KCNV1;KCNC2;CHRNA3;SLC17A6;ABCC12;SLC22A6;SLC2A2
																oxidoreductase activity, acting on paired donors, with incorporation or reduction of molecular oxygen	6	0.0162713	DBH;CYP3A4;PCBD2;CYP2B6;CYP11B1;TH
																ciliary plasm	5	0.0166779	DNAI2;RP1;AKAP14;DNAH8;DRC1
																retinoid binding	3	0.016783	UGT1A1;UGT1A10;UGT1A8
																camera-type eye development	9	0.0167832	RS1;CRYGD;RP1;PRSS56;POU4F2;ATP8A2;TH;VAX1;LAMA1
																epithelial cell differentiation	17	0.0170379	LCE5A;RAPGEF2;ABCA12;SCEL;KRT78;SPRR1B;KRTAP13-2;USH1C;CRYGD;KRT20;KRTAP20-1;LIPN;LAMA1;INSM1;BMP5;PDX1;KRTAP22-1
																visual perception	7	0.0172375	RS1;CRYGD;RP1;COL2A1;POU6F2;ATP8A2;TH
																associative learning	4	0.017513	DBH;AGT;NETO1;ADAM2
																chemosensory behavior	2	0.017632	PRKCG;OBP2B
																growth hormone secretion	2	0.017632	GHRHR;GHSR
																regulation of norepinephrine secretion	2	0.017632	AGT;GHSR
																positive regulation of macrophage derived foam cell differentiation	2	0.017632	PLA2G2A;AGT
																cellular response to nitric oxide	2	0.017632	DPEP1;KCNC2
																aldehyde biosynthetic process	2	0.017632	CYP11B1;BMP5
																positive regulation of humoral immune response	2	0.017632	PGC;C6
																sodium-independent organic anion transport	2	0.017632	SLCO1B7;SLC22A6
																type I interferon receptor binding	2	0.017632	IFNK;IFNA8
																sodium-independent organic anion transmembrane transporter activity	2	0.017632	SLCO1B7;SLC22A6
																Nateglinide	2	0.017632	CYP3A4;SLC22A6
																Hydrocortisone	2	0.017632	CYP3A4;CYP11B1
																Ezetimibe	2	0.017632	UGT1A1;CYP3A4
																Brigatinib	2	0.017632	CYP3A4;ABCB5
																Bioallethrin	2	0.017632	CACNA1I;CYP3A4
																multicellular organismal reproductive process	18	0.0183687	DBH;TSPY2;PIWIL1;DDX4;NME5;VIP;TNP2;CATSPERD;GHRHR;MAEL;OPRM1;POU4F2;PRKACG;CCDC169-SOHLH2;DAZ2;TH;GHSR;RAD21L1
																spermatogenesis	13	0.0187774	TSPY2;PIWIL1;DDX4;NME5;TNP2;CATSPERD;MAEL;POU4F2;PRKACG;CCDC169-SOHLH2;DAZ2;GHSR;RAD21L1
																regulation of membrane potential	11	0.0189057	CACNA1I;SEZ6;GLRA3;NETO1;TRPC5;GRID2;ABCB5;OPRM1;GRIN2C;KCNC2;CHRNA3
																plasma lipoprotein particle organization	3	0.019003	PLA2G2A;AGT;PRKACG
																isoprenoid binding	3	0.019003	UGT1A1;UGT1A10;UGT1A8
																ABC transporters	3	0.019003	ABCA12;ABCB5;ABCC12
																isoprenoid metabolic process	5	0.0190516	UGT1A1;CYP3A4;UGT1A8;IDI2;TH
																peptide secretion	14	0.0191098	AGT;KRT20;VIP;FFAR4;GHRHR;PPY;GRP;OPRM1;KCNC2;CD244;HMHB1;GHSR;PDX1;SLC2A2
																growth factor activity	6	0.0192066	AMBN;FGF3;FGF4;AGT;FGF22;BMP5
																interferon-gamma secretion	2	0.0198151	CD244;HMHB1
																norepinephrine secretion	2	0.0198151	AGT;GHSR
																fusion of sperm to egg plasma membrane involved in single fertilization	2	0.0198151	FOLR3;ADAM2
[truncated: 195 more rows]

## Sheet: DAVID
Supplementary Table 3C. DAVID enrichment analysis of mRNA for White，Black and Asian PCa patients.
[truncated: 121 more rows]
