# Supplementary material for: Comprehensive signature analysis of drug metabolism differences in the White, Black and Asian prostate cancer patients
Source: Aging (Albany NY). 2021 Jun 18;13(12):16316–40. doi: 10.18632/aging.203158 (PMC8266326; doi:10.18632/aging.203158)
Supplement: Supplementary Table 4 [file aging-13-203158-s005.xlsx]

## Sheet: webgestalt
Supplementary Table 4A. Webgestalt enrichment analysis of miRNA for White,Black and Asian PCa patients.
Asian VS Black								Asian VS White								Black VS White
Black				Asian				White				Asian				White				Black
Description	Overlap	PValue	UserId	Description	Overlap	PValue	UserId	Description	Overlap	PValue	UserId	Description	Overlap	PValue	UserId	Description	Overlap	PValue	UserId	Description	Overlap	PValue	UserId
response to drug	19	0.0151989	CAV1;MET;BCL2;REST;ERRFI1;PPP1R12A;LDHA;SYT7;SRP14;SLC6A17;ITGA3;MTHFR;LDOC1;LARP1;SLC19A3;EFNA5;EMX2;PEA15;HMGCS1	response to drug	7	0.0104732	MYB;ACTB;CASTOR2;RTBDN;TBXA2R;TRPC3;PPM1F	Platinum drug resistance	10	0.00104573	SLC31A1;CDKN1A;BBC3;MDM2;XIAP;MAPK1;AKT2;TP53;PIK3R1;BAK1	response to drug	13	0.0161444	STAR;NR3C1;SETD7;GNAI1;RHOA;TXNIP;CASTOR2;NTRK3;ABCC9;COL1A1;PPM1F;PRKAA1;IREB2	drug binding	55	0.00599337	PDK1;MAP3K2;RPS6KA3;PANK2;MCM8;CDK9;BMPR2;PIKFYVE;TRPM7;ATAD3C;XRCC2;SIK2;SMG1;EEF2K;MYLK3;LONP2;TARS2;DGKH;TTLL12;GRK3;TESK2;GRIN2B;IRAK4;DSTYK;ABCB5;FGFR1;MCM4;QRSL1;SPATA5;PANK3;NQO2;ACSL6;PDIK1L;BTK;LIMK1;GSK3B;SBK1;FKBP1A;PFKFB3;HMGCS1;TGFBR1;NOL9;MAP3K9;STK4;TYRO3;ACVR1B;HSPA4L;WNK3;MAPK1;PFKFB2;SGPL1;MYO6;UHMK1;CYB5R3;PIM3	cellular response to drug	11	0.00465365	P2RX3;REST;CASTOR2;NDOR1;MAPK13;FXN;DNMT3B;ETS1;HMGA2;PPM1F;PRKAA1
PI3K-Akt signaling pathway	15	1.05332e-05	IRS1;MET;BCL2;CDK6;IL6R;LAMC1;CCNE2;GNG3;ITGA3;PIK3R2;STK11;SYK;EFNA5;IL2RA;GSK3B	cellular response to drug	4	0.0106644	MYB;ACTB;CASTOR2;PPM1F	response to gamma radiation	8	0.00221177	TMEM109;PML;MDM2;ELK1;XRCC2;TP53;BAK1;GTF2H5	response to antineoplastic agent	3	0.0254509	STAR;NR3C1;PRKAA1	DNA-binding transcription factor activity, RNA polymerase II-specific	63	1.37329e-05	MYB;ZNF705A;ELK4;CREBRF;IKZF3;HOXB5;ZNF652;HES2;SOX7;KDM5A;NFATC2;CTCFL;ARNT;ZNF546;POU2F2;GATAD1;ZBED1;ZNF841;ZNF320;ZNF347;ZNF417;ZNF135;GMEB1;HEYL;MLXIP;REL;ZNF655;ZKSCAN1;ZNF101;ZNF430;ZNF708;ZFP14;ZFP82;ZNF566;ZNF829;ZNF554;ZNF426;ZNF561;POU2F1;TERF1;BCL6;EZH1;ETS1;ONECUT1;ARID5B;EN2;HOXC13;BTG2;GATA2;CREBZF;KLF13;ZNF570;ZNF394;ZMYM1;ZNF490;ZNF500;HOXC8;HMBOX1;NFIB;KLF6;ZBTB25;NR2C2;MLLT1	response to drug	20	0.0249668	P2RX3;RPH3AL;CAV1;CDKN1A;REST;MTHFR;CASTOR2;NDOR1;RTBDN;SYT7;MAPK13;FXN;DNMT3B;ETS1;NTRK3;HMGA2;ABCC9;COL1A1;PPM1F;PRKAA1
synaptic vesicle membrane	8	1.82903e-05	SYT7;SLC6A17;RPH3A;RAB11B;RAB5B;PTPRN2;PRRT2;STX6	drug binding	9	0.0220743	ACTB;UBE2Z;UBE2N;RTBDN;ILK;TAOK1;TGFBR1;MAP3K9;CYB5R3	cellular response to radiation	16	0.00660891	TMEM109;CDKN1A;MAPK14;GRB2;MFAP4;MDM2;ACTR5;ELK1;STK11;AKT2;TP53;PIK3R1;CERS1;PDE6A;BAK1;GTF2H5	cellular response to drug	6	0.0304564	STAR;NR3C1;GNAI1;CASTOR2;PPM1F;PRKAA1	regulation of small molecule metabolic process	20	0.000140089	IRS1;PDK1;HMGB1;PANK2;LONP2;ARNT;PDP2;SLC35B4;PLIN5;LDLR;ELOVL5;GSK3B;PPP1R3B;PFKFB3;HMGCS1;ENTPD5;PMAIP1;SCD;RAN;PFKFB2	negative regulation of transcription by RNA polymerase II	25	5.06223e-05	E2F6;TCERG1;HMGB1;CAV1;FOXK2;HMBOX1;ELK4;REST;ESR1;SUV39H1;AR;ETV3;MTDH;DNMT3B;SNAI2;NFIX;SKI;REL;SKIL;HES2;HMGA2;BACH2;RREB1;CBX5;SOX2
intrinsic component of synaptic vesicle membrane	5	0.000153217	SLC6A17;RAB11B;RAB5B;PTPRN2;STX6	response to radiation	4	0.0235083	MEN1;TRPC3;GEN1;INIP	cellular response to gamma radiation	5	0.00713299	TMEM109;MDM2;ELK1;TP53;GTF2H5	response to antibiotic	8	0.00133175	STAR;SETD7;GNAI1;RHOA;TXNIP;NTRK3;COL1A1;PRKAA1	regulation of cellular catabolic process	34	0.000176998	IRS1;HMGB1;DFFA;PNPT1;PIKFYVE;USP14;TRIM65;TIRAP;LONP2;LRIG2;ARNT;DCP1A;CISD2;PLIN5;LDLR;BCL2L11;CACNG7;GSK3B;EEF1A1;PPP1R3B;TRIM67;IKBKG;PFKFB3;QSOX1;BTG2;MTMR3;TMEM59;ENTPD5;ZC3H12D;LAMTOR1;MTMR9;TNRC6B;PFKFB2;NUP214	negative regulation of RNA biosynthetic process	31	0.00012851	E2F6;TCERG1;HMGB1;ZNF417;CAV1;FOXK2;HMBOX1;POU2F1;ELK4;REST;ESR1;SUV39H1;AR;ETV3;MTDH;DNMT3B;SNAI2;NFIX;SKI;LIMS1;REL;SKIL;HES2;HMGA2;BACH2;RREB1;CBX5;PPM1F;TOB2;SOX2;ZNF12
negative regulation of transcription by RNA polymerase II	22	0.000160932	HMGB1;CAV1;HOXC8;ATXN1L;MYOCD;REST;LEF1;SMAD4;MDM4;ZBTB20;CBX2;ZHX3;SATB2;SMAD2;MNT;BTG2;HEYL;HES2;CBX5;NFIC;CBX6;LCOR	drug transmembrane transporter activity	2	0.0258341	RTBDN;OCA2	drug binding	93	0.00865023	EPHB1;DDX6;TTF2;CSNK2A1;ABL2;MAP3K9;ULK2;P2RX3;SPTLC3;ACTR1A;DSTYK;MAPK14;UHMK1;PAK3;ATP2B1;PPIA;PDK3;PRPS1;PTK6;ACTA1;DYRK2;CDK6;AGK;OXSR1;NME4;RPS6KA5;DDX19B;PDXK;RPS6KA3;PTPA;DDR1;RARA;MAT2A;MYH14;UBE2S;NEK4;ATP6V1A;MAT1A;FKBP5;GRIN2B;SMC2;CHD4;NPR1;ADCY6;PIK3C2B;MAPKAPK2;KSR2;CAMK2G;DHX33;STK4;PRPF4B;GNE;STK35;MCM8;OLA1;EEF2K;TEP1;AK3;UBE2G2;MAPK1;YME1L1;ADCY2;UBE2N;RPS6KA4;MAP4K2;CAMK2A;STK1…	Wnt signaling pathway, calcium modulating pathway	3	0.00165315	TNRC6B;TNRC6C;AGO1	coenzyme metabolic process	20	0.000204947	PDK1;PANK2;LIAS;H6PD;ARNT;PDP2;THEM4;DHTKD1;PANK3;ACSL6;SLC25A16;ELOVL5;GPI;PFKFB3;HMGCS1;ENTPD5;PGM2L1;SCD;PFKFB2;CYB5R3	cellular response to external stimulus	13	0.000279922	SLC38A2;P2RX3;CDKN1A;TLR7;WNT9B;CASTOR2;SNAI2;SESN3;GLUL;KCNB1;COL1A1;CASP2;PRKAA1
synapse	26	0.000475687	OPHN1;PALM;GRM7;FXR1;SYT7;NPTXR;SLC6A17;IQSEC2;RPH3A;GNG3;RAB11B;RAB5B;PTPRN2;ITGA3;MTHFR;ELK1;PRRT2;RNF216;CABP4;EFNA5;STX6;SHISA9;SRCIN1;FRMPD4;ANK1;GSK3B	activation of MAPKK activity	3	0.000286629	TAOK1;TGFBR1;MAP3K9	DNA-binding transcription factor activity, RNA polymerase II-specific	107	1.79298e-06	NONO;ZNF785;KCNIP3;EMX2;SPIB;GATAD2A;ZNF430;CREBRF;ZNF786;ZNF417;ESR1;ZBTB39;BNC2;MACC1;CARHSP1;ZNF562;CREB1;ZNF619;SMARCC1;RFX3;MYOCD;KDM5C;E2F5;PGR;HIC2;REST;NSD2;LEF1;SMAD4;ZNF614;SSBP2;MYCN;ZNF264;PLAGL2;KLF13;RARA;PAX2;ZNF70;BTG2;NRF1;PROX1;ZNF518B;RORA;MAZ;BHLHE40;ZNF426;SRF;HES2;ZNF268;MNT;HOXC8;NFX1;ZC3H15;KAT7;TARDBP;ELK1;TSHZ2;TFDP2;MAFF;ZNF841;ZNF347;ZNF154;PKNOX1;ZNF485;CC2D1B;GMEB1;H…	cellular response to external stimulus	8	0.00174986	FNIP1;ULK1;CASTOR2;KCNB1;COL1A1;CASP2;PRKAA1;IREB2	regulation of catabolic process	37	0.000252582	IRS1;HMGB1;DFFA;PNPT1;FAM83D;PIKFYVE;USP14;TRIM65;TIRAP;LONP2;NKD1;LRIG2;ARNT;DCP1A;UBXN2A;CISD2;PLIN5;LDLR;BCL2L11;CACNG7;GSK3B;EEF1A1;PPP1R3B;TRIM67;IKBKG;PFKFB3;QSOX1;BTG2;MTMR3;TMEM59;ENTPD5;ZC3H12D;LAMTOR1;MTMR9;TNRC6B;PFKFB2;NUP214	negative regulation of response to stimulus	35	0.00043681	METRNL;RPH3AL;SOD2;CAV1;PALM;CDKN1A;YOD1;ESR1;TNFAIP8L1;STK4;AR;CD3E;CASTOR2;GRINA;FXN;ETS1;SNAI2;FSTL3;SESN3;SKI;BID;FER;SKIL;INSIG1;NTRK3;LRPAP1;SOCS7;PADI2;HMGA2;EPHA4;PRKAA1;TRAF3IP1;C5orf30;SOX2;IGF1R
synapse part	22	0.000616923	OPHN1;PALM;GRM7;FXR1;SYT7;SLC6A17;RPH3A;GNG3;RAB11B;RAB5B;PTPRN2;ITGA3;ELK1;PRRT2;RNF216;CABP4;STX6;SHISA9;SRCIN1;FRMPD4;ANK1;GSK3B	positive regulation of MAP kinase activity	5	0.000423788	UBE2N;ILK;TAOK1;TGFBR1;MAP3K9	kinase activity	64	6.39021e-06	EPHB1;CCND2;CSNK2A1;ABL2;MAP3K9;IL5;ULK2;CDKN1A;ESR1;DSTYK;MAPK14;UHMK1;PAK3;PDK3;PRPS1;PTK6;GRB2;DYRK2;CDK6;AGK;OXSR1;NME4;CDKN1B;RPS6KA5;CCNE2;PDXK;RPS6KA3;DDR1;NRG4;NEK4;FGF9;NPR1;PIK3C2B;MAPKAPK2;KSR2;PRKAB1;CAMK2G;STK4;PRPF4B;GNE;STK35;EEF2K;AK3;EFNA3;MAPK1;RPS6KA4;MAP4K2;CAMK2A;STK11;ACVR2A;AKT2;GK5;SYK;TGFBR1;PHKG2;CCNT1;PIK3R1;BMPR2;MYLK3;FAM20B;TAOK1;WNK3;CAB39;SCYL3	cellular response to extracellular stimulus	7	0.00188284	FNIP1;ULK1;CASTOR2;KCNB1;COL1A1;PRKAA1;IREB2	DNA-binding transcription activator activity, RNA polymerase II-specific	21	0.00145309	MYB;ELK4;CREBRF;IKZF3;HOXB5;NFATC2;CTCFL;POU2F2;ZBED1;GMEB1;HEYL;MLXIP;REL;ETS1;ONECUT1;HOXC13;GATA2;KLF13;NFIB;KLF6;NR2C2	cellular response to abiotic stimulus	12	0.000738386	CAB39;SLC38A2;PALM;CDKN1A;TLR7;REST;MAPK13;SNAI2;HMGA2;COL1A1;DDB1;CASP2
synaptic vesicle	8	0.000932289	SYT7;SLC6A17;RPH3A;RAB11B;RAB5B;PTPRN2;PRRT2;STX6	regulation of protein kinase activity	8	0.000493856	ACTB;UBE2N;MEN1;ILK;TAOK1;TGFBR1;MAP3K9;PPM1F	phosphotransferase activity, alcohol group as acceptor	60	8.79707e-06	EPHB1;CCND2;CSNK2A1;ABL2;MAP3K9;IL5;ULK2;CDKN1A;ESR1;DSTYK;MAPK14;UHMK1;PAK3;PDK3;PTK6;GRB2;DYRK2;CDK6;AGK;OXSR1;CDKN1B;RPS6KA5;CCNE2;PDXK;RPS6KA3;DDR1;NRG4;NEK4;FGF9;NPR1;PIK3C2B;MAPKAPK2;KSR2;PRKAB1;CAMK2G;STK4;PRPF4B;GNE;STK35;EEF2K;EFNA3;MAPK1;RPS6KA4;MAP4K2;CAMK2A;STK11;ACVR2A;AKT2;GK5;SYK;TGFBR1;PHKG2;CCNT1;PIK3R1;BMPR2;MYLK3;FAM20B;TAOK1;WNK3;CAB39	regulation of modification of synaptic structure	2	0.00282456	RHOA;EPHA4	regulation of coenzyme metabolic process	6	0.0018767	PDK1;ARNT;PDP2;PFKFB3;ENTPD5;PFKFB2	cellular response to environmental stimulus	12	0.000738386	CAB39;SLC38A2;PALM;CDKN1A;TLR7;REST;MAPK13;SNAI2;HMGA2;COL1A1;DDB1;CASP2
RNA polymerase II proximal promoter sequence-specific DNA binding	14	0.00163598	HNF4A;RFX3;MYOCD;REST;LEF1;SMAD4;MYCN;POU2F1;SATB2;SMAD2;ELK1;HEYL;HES2;NFIC	enzyme linked receptor protein signaling pathway	9	0.000604736	USP15;ACTB;AP2M1;MEN1;ILK;CD109;TGFBR1;STAM;ARID5B	Ras signaling pathway	23	0.000162091	ABL2;PAK3;VEGFA;GRB2;GNG3;GRIN2B;PLCG1;RAB5C;RASGRF1;FGF9;RAB5B;KSR2;RAP1A;STK4;ELK1;GNB4;EFNA3;MAPK1;CALML3;AKT2;PIK3R1;REL;EFNA5	ATP	3	0.00299787	ABCC9;GRK3;PRKAA1	ATP generation from ADP	7	0.00189664	ARNT;DHTKD1;GPI;PFKFB3;ENTPD5;PGM2L1;PFKFB2	DNA-binding transcription factor activity, RNA polymerase II-specific	35	0.000793701	E2F6;ZNF417;ZBTB34;FOXK2;HMBOX1;GATAD1;MBNL3;ZBED1;POU2F1;ELK4;REST;ESR1;NR2C2;AR;PKNOX2;ETV3;DNMT3B;ETS1;SNAI2;NFIX;SKI;REL;UNKL;SKIL;HES2;ZNF483;HMGA2;BACH2;HBP1;RREB1;ZFP36L2;ZBTB37;MTF1;SOX2;ZNF12
transport vesicle membrane	8	0.00171236	SYT7;SLC6A17;RPH3A;RAB11B;RAB5B;PTPRN2;PRRT2;STX6	regulation of MAP kinase activity	5	0.00137067	UBE2N;ILK;TAOK1;TGFBR1;MAP3K9	regulation of RNA polymerase II transcriptional preinitiation complex assembly	5	0.000204595	HMGB1;ESR1;CREB1;TP53;ATF7IP	mTOR signaling pathway	5	0.00353232	FNIP1;PIK3R2;ULK1;RHOA;PRKAA1	adenyl ribonucleotide binding	51	0.00321752	PDK1;MAP3K2;RPS6KA3;PANK2;MCM8;CDK9;BMPR2;PIKFYVE;TRPM7;ATAD3C;XRCC2;SIK2;SMG1;EEF2K;MYLK3;LONP2;TARS2;DGKH;TTLL12;GRK3;TESK2;IRAK4;DSTYK;ABCB5;PRKAR2A;FGFR1;MCM4;QRSL1;SPATA5;PANK3;ACSL6;PDIK1L;BTK;LIMK1;GSK3B;SBK1;PFKFB3;TGFBR1;NOL9;MAP3K9;STK4;TYRO3;ACVR1B;HSPA4L;WNK3;MAPK1;PFKFB2;MYO6;UHMK1;CYB5R3;PIM3	RNA polymerase II regulatory region sequence-specific DNA binding	20	0.000879459	E2F6;FOXK2;ZBED1;POU2F1;ELK4;REST;ESR1;NR2C2;AR;PKNOX2;ETV3;ETS1;SNAI2;REL;SKIL;HES2;HMGA2;BACH2;RREB1;MTF1
EGFR tyrosine kinase inhibitor resistance	5	0.00187397	MET;BCL2;IL6R;PIK3R2;GSK3B	MAP kinase kinase kinase activity	2	0.00201554	TAOK1;MAP3K9	p53 signaling pathway	11	0.000227031	CCND2;CDKN1A;CDK6;CCNE2;MDM4;SESN2;EI24;BBC3;MDM2;RPRM;TP53	GTPase activating protein binding	2	0.00386042	ARL3;TUBB	small molecule metabolic process	63	0.00346022	IRS1;PDK1;L2HGDH;HMGB1;ST3GAL1;B3GNT2;FXN;PANK2;LIAS;LYRM4;CYP27C1;UGGT1;G6PC;H6PD;FADS6;GDE1;LONP2;TARS2;ARNT;PDP2;GNPNAT1;PSPH;IDS;THEM4;APOL1;DHTKD1;CYCS;FGFR1;PPM1K;QRSL1;GFPT1;SLC35B4;LRAT;PANK3;UEVLD;ACSL6;PLIN5;LDLR;ELOVL5;PTGS1;GGT5;GPI;GSK3B;PTGES2;ONECUT1;ZADH2;PPP1R3B;IDH3A;PFKFB3;HMGCS1;ENTPD5;PGM2L1;PMAIP1;BNIP2;ACOX1;CDIPT;SCD;RAN;MAPK1;PFKFB2;CHSY1;SGPL1;CYB5R3	RNA polymerase II regulatory region DNA binding	20	0.000971673	E2F6;FOXK2;ZBED1;POU2F1;ELK4;REST;ESR1;NR2C2;AR;PKNOX2;ETV3;ETS1;SNAI2;REL;SKIL;HES2;HMGA2;BACH2;RREB1;MTF1
AMPK signaling pathway	6	0.00224584	IRS1;HNF4A;RAB11B;SCD;PIK3R2;STK11	stress-activated MAPK cascade	4	0.00473042	UBE2N;MEN1;TAOK1;MAP3K9	Prostate cancer	13	0.000244325	CDKN1A;CREB1;GRB2;CDKN1B;CCNE2;LEF1;MDM2;MAPK1;CREB3L2;AKT2;TP53;E2F2;PIK3R1	non-canonical Wnt signaling pathway	4	0.00496011	TNRC6B;TNRC6C;RHOA;AGO1	ADP metabolic process	7	0.00355809	ARNT;DHTKD1;GPI;PFKFB3;ENTPD5;PGM2L1;PFKFB2	DNA-binding transcription activator activity, RNA polymerase II-specific	14	0.00147327	E2F6;FOXK2;ZBED1;ELK4;REST;ESR1;NR2C2;AR;ETS1;REL;HMGA2;RREB1;MTF1;SOX2
regulatory region nucleic acid binding	20	0.00249527	HMGB1;HNF4A;RFX3;MYOCD;REST;LEF1;SMAD4;MYCN;POU2F1;ZBTB20;ZHX3;BASP1;SATB2;SMAD2;ELK1;MNT;HEYL;HES2;ZNF704;NFIC	activin receptor signaling pathway	2	0.00505674	MEN1;TGFBR1	PI3K-Akt signaling pathway	30	0.000300843	CCND2;CDKN1A;PPP2R1B;THBS2;CREB1;IL6R;VEGFA;GRB2;CDK6;YWHAZ;CDKN1B;LAMC1;CCNE2;GNG3;PRLR;FGF9;MDM2;ITGA2;ITGA3;GNB4;EFNA3;MAPK1;IL2RA;CREB3L2;STK11;AKT2;TP53;SYK;PIK3R1;EFNA5	regulation of ER to Golgi vesicle-mediated transport	2	0.00637777	ARF1;INSIG1	positive regulation of cofactor metabolic process	4	0.00358179	ARNT;PFKFB3;ENTPD5;PFKFB2	RNA polymerase II proximal promoter sequence-specific DNA binding	15	0.00184553	FOXK2;ZBED1;POU2F1;ELK4;REST;ESR1;NR2C2;AR;ETS1;SNAI2;SKIL;HES2;HMGA2;RREB1;MTF1
chemical homeostasis	23	0.00331303	MYLIP;IRS1;HMGB1;SOD2;CAV1;HNF4A;MET;RALY;TPCN2;BCL2;SMAD4;KCTD7;CCR5;STC2;ZBTB20;GNG3;RAB11B;PTPRN2;TMEM97;PIK3R2;STK11;EFNA5;GRAMD1B	activation of MAPK activity	3	0.00615222	UBE2N;TAOK1;MAP3K9	vesicle fusion	12	0.000396042	VAMP1;GOSR2;STX2;VAV3;RAB7A;CALR;PRRT2;AKT2;STX1B;STX16;STX6;VPS41	negative regulation of response to stimulus	19	0.00723332	FNIP1;CRY2;FFAR4;MTRNR2L1;PIK3R2;MCL1;RHOA;NCOR2;TRIM67;CASTOR2;SKIL;INSIG1;NTRK3;LRPAP1;EPHA4;PRKAA1;TRAF3IP1;C5orf30;SIAH2	ATP binding	49	0.00403483	PDK1;MAP3K2;RPS6KA3;PANK2;MCM8;CDK9;BMPR2;PIKFYVE;TRPM7;ATAD3C;XRCC2;SIK2;SMG1;EEF2K;MYLK3;LONP2;TARS2;DGKH;TTLL12;GRK3;TESK2;IRAK4;DSTYK;ABCB5;FGFR1;MCM4;QRSL1;SPATA5;PANK3;ACSL6;PDIK1L;BTK;LIMK1;GSK3B;SBK1;PFKFB3;TGFBR1;NOL9;MAP3K9;STK4;TYRO3;ACVR1B;HSPA4L;WNK3;MAPK1;PFKFB2;MYO6;UHMK1;PIM3	Wnt signaling pathway	14	0.00192525	TMEM237;CAV1;ESR1;AGO3;STK4;WNT9B;AGO2;SNAI2;SKI;HBP1;COL1A1;DDB1;PRKAA1;SOX2
DNA damage response, signal transduction by p53 class mediator resulting in cell cycle arrest	4	0.00347156	CNOT4;MDM4;BTG2;CNOT6L	stress-activated protein kinase signaling cascade	4	0.00671201	UBE2N;MEN1;TAOK1;MAP3K9	DNA damage response, signal transduction by p53 class mediator resulting in cell cycle arrest	9	0.000568479	CDKN1A;PML;CDKN1B;MDM4;BTG2;CNOT6L;MDM2;TFDP2;TP53	cellular response to steroid hormone stimulus	6	0.00781916	STAR;NR3C1;CRY2;RHOA;NCOR2;ZFP36L2	positive regulation of ATP biosynthetic process	4	0.00462495	ARNT;PFKFB3;ENTPD5;PFKFB2	DNA-binding transcription repressor activity, RNA polymerase II-specific	10	0.00203315	E2F6;FOXK2;HMBOX1;REST;ETV3;SNAI2;SKIL;HES2;HMGA2;BACH2
Prostate cancer	5	0.00456485	BCL2;CCNE2;LEF1;PIK3R2;GSK3B	regulation of MAPK cascade	6	0.0096405	UBE2N;MEN1;ILK;TAOK1;TGFBR1;MAP3K9	vesicle-mediated transport	112	0.000587139	SURF4;ABL2;CD55;SERPINA4;DCTN4;RAB21;CACNG8;HMGB1;RPH3AL;CAV1;VAMP2;VAMP1;ACTR1A;NFAM1;MAPK14;CCDC93;GOSR2;ERC1;CYBB;PITPNM3;STX2;PPIA;SIGLEC14;VEGFA;ACAP2;ESYT2;GRB2;BLOC1S3;REST;PHACTR2;RTN3;NLGN2;PTGES2;VAV3;PDXK;VPS37B;DPYSL2;RAB7A;SDC4;RARA;SFT2D2;CALR;RAB11B;PLCG1;RAB5C;EXOC7;HPR;RAB5B;PKP1;MAPKAPK2;GM2A;BBS1;DVL1;RAP1A;ADA2;ITGA2;SAR1B;HEATR5A;OLA1;MAGT1;EEF2K;PRRT2;RACGAP1;AP2M1;FLG2;MAPK…	response to extracellular stimulus	9	0.00797208	FNIP1;STAR;ADIPOR2;ULK1;CASTOR2;KCNB1;COL1A1;PRKAA1;IREB2	snRNA transcription by RNA polymerase II	6	0.00567167	CDK9;POU2F2;PHAX;POU2F1;NABP1;RPRD2	cellular response to DNA damage stimulus	20	0.0028674	HMGB1;CDKN1A;INO80D;TAOK1;POLD3;SUV39H1;TMEM189-UBE2V1;SUSD6;SPRTN;SNAI2;GTF2H1;BID;SKIL;RNF111;HMGA2;CBX5;JMY;DDB1;CASP2;CNOT6L
signal release	12	0.00515143	IRS1;HNF4A;RFX3;REST;SMAD4;SYT7;RAB11B;SMAD2;PTPRN2;PRRT2;EFNA5;GSK3B	positive regulation of MAPK cascade	5	0.0108471	UBE2N;ILK;TAOK1;TGFBR1;MAP3K9	membrane fusion	16	0.00060565	CCR5;VAMP2;VAMP1;GOSR2;STX2;PPIA;VAV3;RAB7A;CALR;PRRT2;AKT2;STX1B;STX16;BET1L;STX6;VPS41	AMPK signaling pathway	4	0.00874564	ADIPOR2;PIK3R2;ULK1;PRKAA1	positive regulation of ATP metabolic process	4	0.00892872	ARNT;PFKFB3;ENTPD5;PFKFB2	integral component of synaptic membrane	7	0.00329841	P2RX3;GRID1;SHISA9;ADAM22;SYT7;NTRK3;EPHA4
integral component of synaptic vesicle membrane	3	0.00578211	SLC6A17;PTPRN2;STX6	calmodulin-dependent protein phosphatase activity	1	0.0122947	PPM1F	cytoplasmic vesicle part	88	0.000656009	EPHB1;SURF4;CD55;SERPINA4;ULK2;RAB21;CACNG8;HMGB1;RPH3AL;CAV1;GJA1;VAMP2;VAMP1;NFAM1;MAPK14;GOSR2;CYBB;PPIA;SIGLEC14;VEGFA;ACAP2;PML;PHACTR2;PTGES2;PDXK;VPS37B;ANTXR2;CD164;SLC6A17;RAB7A;WNT3;RPH3A;CALR;RAB11B;PRLR;RAB5C;RAB5B;MDM2;PKP1;GM2A;CAMK2G;RAP1A;ADA2;SAR1B;SLC48A1;IYD;OLA1;ECE1;SNX22;MAGT1;PRRT2;AP2M1;FLG2;MAPK1;OPTN;NFASC;RAB15;RAB10;CAMK2A;COMMD9;SAR1A;TSPAN14;RAB11FIP4;SLC11A2;PLAC8;G…	modification of synaptic structure	2	0.00946215	RHOA;EPHA4	positive regulation of axon guidance	2	0.0133499	BMPR2;SEMA5A	positive regulation of extrinsic apoptotic signaling pathway	4	0.00350824	CAV1;STK4;BID;SKIL
p53 binding	4	0.00592296	PSME3;STK11;USP7;GSK3B	cellular response to acid chemical	3	0.0137466	MYB;CASTOR2;SMARCD1	RNA polymerase II regulatory region sequence-specific DNA binding	50	0.000690946	NONO;KCNIP3;SPIB;CREBRF;ESR1;MACC1;CREB1;SMARCC1;RFX3;MYOCD;PGR;HIC2;REST;LEF1;SMAD4;SSBP2;MYCN;KLF13;RARA;NRF1;PROX1;RORA;CHD4;MAZ;BHLHE40;SRF;HES2;MNT;NFX1;PCGF3;ELK1;TFDP2;MAFF;CC2D1B;GMEB1;HEYL;MLXIP;CREB3L2;FOSL1;IKZF3;CNBP;TP53;E2F2;ZBTB16;NFIC;KDM2B;REL;BACH2;PRDM4;POU2F1	Autophagy	4	0.0109041	PIK3R2;ULK1;ATG13;PRKAA1	ATP biosynthetic process	7	0.0158808	ARNT;DHTKD1;GPI;PFKFB3;ENTPD5;PGM2L1;PFKFB2	regulation of AMPA receptor activity	3	0.0036318	CACNG8;SHISA9;MINK1
G protein-coupled receptor signaling pathway involved in heart process	2	0.00633439	CAV1;AKAP13	intrinsic apoptotic signaling pathway by p53 class mediator	2	0.0151576	PHLDA3;JMY	DNA-binding transcription activator activity, RNA polymerase II-specific	34	0.000782517	SPIB;CREBRF;ESR1;MACC1;CREB1;MYOCD;E2F5;PGR;REST;LEF1;SMAD4;SSBP2;MYCN;PLAGL2;KLF13;NRF1;RORA;SRF;TARDBP;ELK1;TFDP2;MAFF;PKNOX1;GMEB1;HEYL;MLXIP;CREB3L2;FOSL1;IKZF3;TP53;E2F2;NFIC;REL;PRDM4	Wnt signaling pathway	8	0.0120282	TNRC6B;TNRC6C;RHOA;AGO1;COL1A1;DDB1;PRKAA1;SIAH2	cellular response to insulin-like growth factor stimulus	2	0.0169065	CRK;SYAP1	intrinsic component of synaptic membrane	7	0.00497101	P2RX3;GRID1;SHISA9;ADAM22;SYT7;NTRK3;EPHA4
positive regulation of tumor necrosis factor biosynthetic process	2	0.00633439	MAPKAPK2;SPN	signal transduction by p53 class mediator	3	0.0166116	PHLDA3;BRPF1;JMY	regulation of transcription initiation from RNA polymerase II promoter	6	0.000820601	HMGB1;ESR1;CREB1;SRF;TP53;ATF7IP	positive regulation of calcium ion-dependent exocytosis	2	0.0121286	ARF1;KCNB1	presynaptic membrane assembly	2	0.0169065	NLGN4X;NLGN2	cellular response to granulocyte macrophage colony-stimulating factor stimulus	2	0.00529873	ETV3;ZFP36L2
Wnt signaling pathway, calcium modulating pathway	3	0.00682446	LEF1;TNRC6B;TNRC6A	calcium-dependent protein serine/threonine phosphatase activity	1	0.0171711	PPM1F	RNA polymerase II regulatory region DNA binding	50	0.00082716	NONO;KCNIP3;SPIB;CREBRF;ESR1;MACC1;CREB1;SMARCC1;RFX3;MYOCD;PGR;HIC2;REST;LEF1;SMAD4;SSBP2;MYCN;KLF13;RARA;NRF1;PROX1;RORA;CHD4;MAZ;BHLHE40;SRF;HES2;MNT;NFX1;PCGF3;ELK1;TFDP2;MAFF;CC2D1B;GMEB1;HEYL;MLXIP;CREB3L2;FOSL1;IKZF3;CNBP;TP53;E2F2;ZBTB16;NFIC;KDM2B;REL;BACH2;PRDM4;POU2F1	long-term synaptic depression	2	0.0161303	ARF1;KCNB1	potassium channel inhibitor activity	2	0.0169065	ENSA;WNK3	response to extracellular stimulus	14	0.00556479	SLC38A2;P2RX3;CDKN1A;WNT9B;MTHFR;CD3E;CASTOR2;DNMT3B;SNAI2;SESN3;GLUL;KCNB1;COL1A1;PRKAA1
regulation of generation of precursor metabolites and energy	5	0.00716151	IRS1;HMGB1;ZBTB20;PHKG2;GSK3B	regulation of stress-activated MAPK cascade	3	0.0186944	MEN1;TAOK1;MAP3K9	calmodulin-dependent protein kinase activity	6	0.00100704	MAPKAPK2;CAMK2G;EEF2K;CAMK2A;PHKG2;MYLK3	cellular response to endogenous stimulus	16	0.0182977	STAR;ADIPOR2;NR3C1;CRY2;PIK3R2;RHOA;NCOR2;CASTOR2;SKIL;NTRK3;COL1A1;ZFP36L2;EPHA4;FRS2;PRKAA1;IREB2	cellular response to transforming growth factor beta stimulus	11	0.017721	USP15;BMPR2;LIMS1;CRK;ONECUT1;CD109;CBL;PEG10;TGFBR1;ACVR1B;NPNT	synaptic membrane	12	0.00817605	P2RX3;GRID1;CACNG8;SHISA9;PALM;ADAM22;MINK1;SYT7;NTRK3;KCNB1;EPHA4;FCHO2
regulation of postsynaptic neurotransmitter receptor activity	2	0.00754591	NPTXR;SHISA9	postsynaptic actin cytoskeleton organization	1	0.0196004	ACTB	Fostamatinib	25	0.00148056	EPHB1;CSNK2A1;ABL2;MAP3K9;ULK2;MAPK14;PAK3;PTK6;OXSR1;RPS6KA3;DDR1;NEK4;SLC29A1;PIK3C2B;PRKAB1;CAMK2G;PRPF4B;STK35;MAP4K2;CAMK2A;SYK;TGFBR1;BMPR2;MYLK3;TAOK1	response to endogenous stimulus	18	0.0200884	STAR;ADIPOR2;NR3C1;CRY2;PIK3R2;GNAI1;RHOA;TXNIP;NCOR2;CASTOR2;SKIL;NTRK3;COL1A1;ZFP36L2;EPHA4;FRS2;PRKAA1;IREB2	Ras signaling pathway	11	0.018236	GNB4;GRIN2B;FGFR1;REL;PLA2G12A;ETS1;RALBP1;IKBKG;STK4;RAB5B;MAPK1	cellular response to electrical stimulus	2	0.00947715	PALM;REST
RNA polymerase II regulatory region sequence-specific DNA binding	16	0.00759199	HNF4A;RFX3;MYOCD;REST;LEF1;SMAD4;MYCN;POU2F1;ZHX3;SATB2;SMAD2;ELK1;MNT;HEYL;HES2;NFIC	RNA polymerase I regulatory region DNA binding	1	0.0196004	UBTF	enzyme linked receptor protein signaling pathway	62	0.00161475	EPHB1;SHB;CDH5;SH2B3;RNF165;CAV1;GLG1;DSTYK;DKK3;MAPK14;CCBE1;PAK3;CYBB;CREB1;PTK6;SMARCC1;MYOCD;VEGFA;ERRFI1;PML;GRB2;NDST1;RPS6KA5;LEF1;SMAD4;VAV3;ANKS1A;RAB7A;DDR1;IGFBP4;NRG4;FKBP8;ATP6V1A;PRLR;GRIN2B;PLCG1;CRB2;FGF9;XIAP;NPR1;MAPKAPK2;SPRED1;OSBPL8;MYORG;PTPN2;ZNF106;ITGA3;TIAL1;AP2M1;EFNA3;MAPK1;STK11;GTF2F1;ACVR2A;AKT2;FSTL3;SYK;TGFBR1;PIK3R1;POLR2E;BMPR2;EFNA5	RNA polymerase II complex binding	2	0.0218092	AGO1;ELP2	regulation of AMPA receptor activity	3	0.0188355	SHISA9;CACNG7;NLGN2	regulation of vesicle-mediated transport	13	0.0103847	OPHN1;RAB21;HMGB1;RPH3AL;CAV1;REST;SYT7;CD151;FER;INSIG1;LRPAP1;KCNB1;PRKAA1
RNA polymerase II regulatory region DNA binding	16	0.00817837	HNF4A;RFX3;MYOCD;REST;LEF1;SMAD4;MYCN;POU2F1;ZHX3;SATB2;SMAD2;ELK1;MNT;HEYL;HES2;NFIC	RNA polymerase I regulatory region sequence-specific DNA binding	1	0.0196004	UBTF	positive regulation of transcription by RNA polymerase II	71	0.00169818	SPIB;KPNA6;CREBRF;HMGB1;MICAL2;ESR1;GABPB1;MAPK14;MACC1;CRTC1;CREB1;SMARCC1;RFX3;MYOCD;VEGFA;E2F5;PGR;REST;RPS6KA5;PPP1R12A;LEF1;SMAD4;SSBP2;MYCN;RPS6KA3;PLAGL2;KLF13;RARA;PAX2;AGO2;SESN2;NRF1;PROX1;RORA;S1PR1;SRF;ZNF268;WWC1;SENP2;KAT7;TARDBP;ELK1;TFDP2;MAFF;PKNOX1;ZNF485;GMEB1;HEYL;MLXIP;CREB3L2;RPS6KA4;FOSL1;GTF2F1;ACVR2A;IKZF3;BCAS3;PLAC8;CNBP;TP53;FSTL3;E2F2;ZBTB16;CCNT1;PIK3R1;NFIC;BMPR2;RE…	ATP metabolic process	5	0.0260395	AK2;CYCS;RHOA;COX10;PRKAA1	store-operated calcium channel activity	2	0.0208166	ORAI2;TRPC3	positive regulation of transcription by RNA polymerase II	24	0.0116466	E2F6;HMGB1;MICAL2;FOXK2;ZBED1;POU2F1;ELK4;REST;ESR1;NR2C2;AR;AGO2;ETS1;NFIX;FSTL3;GTF2H1;SKI;REL;INSIG1;RNF111;HMGA2;RREB1;MTF1;SOX2
p53 signaling pathway	4	0.00847627	BCL2;CDK6;CCNE2;MDM4	MAPK cascade	6	0.0221618	UBE2N;MEN1;ILK;TAOK1;TGFBR1;MAP3K9	ATP binding	85	0.00186576	EPHB1;DDX6;TTF2;CSNK2A1;ABL2;MAP3K9;ULK2;P2RX3;ACTR1A;DSTYK;MAPK14;UHMK1;PAK3;ATP2B1;PDK3;PRPS1;PTK6;ACTA1;DYRK2;CDK6;AGK;OXSR1;NME4;RPS6KA5;DDX19B;PDXK;RPS6KA3;PTPA;DDR1;MAT2A;MYH14;UBE2S;NEK4;ATP6V1A;MAT1A;SMC2;CHD4;NPR1;ADCY6;PIK3C2B;MAPKAPK2;KSR2;CAMK2G;DHX33;STK4;PRPF4B;GNE;STK35;MCM8;OLA1;EEF2K;TEP1;AK3;UBE2G2;MAPK1;YME1L1;ADCY2;UBE2N;RPS6KA4;MAP4K2;CAMK2A;STK11;ACVR2A;XRCC2;AKT2;GK5;MTHFD1…	neuron-neuron synaptic transmission	1	0.0331272	TMOD2	regulation of purine nucleotide metabolic process	6	0.0218757	PDK1;ARNT;PDP2;PFKFB3;ENTPD5;PFKFB2	regulation of extrinsic apoptotic signaling pathway	6	0.0123146	CAV1;STK4;AR;SNAI2;BID;SKIL
anchored component of synaptic vesicle membrane	2	0.008853	RAB11B;RAB5B	store-operated calcium channel activity	1	0.0244415	TRPC3	MAPK signaling pathway	24	0.00201257	CACNG8;MAPK14;VEGFA;GRB2;RPS6KA5;RPS6KA3;DUSP9;RASGRF1;FGF9;MAPKAPK2;SRF;RAP1A;STK4;ELK1;EFNA3;MAPK1;RPS6KA4;MAP4K2;MAPK8IP3;AKT2;TP53;TGFBR1;EFNA5;TAOK1	ATPase inhibitor activity	1	0.0331272	FNIP1	unsaturated fatty acid biosynthetic process	4	0.0222364	ELOVL5;PTGS1;PTGES2;SCD	regulation of RNA polymerase II transcriptional preinitiation complex assembly	2	0.012854	HMGB1;ESR1
regulation of vesicle-mediated transport	12	0.010194	OPHN1;HMGB1;CAV1;GAS1;REST;SYT7;RAB11B;RAB5B;PRRT2;SYK;SDC4;GSK3B	positive regulation of transport	6	0.0262873	MYB;ACTB;RAB15;UBL5;TRPC3;STAM	cellular response to estrogen stimulus	4	0.0023545	ESR1;RARA;MDM2;BCAS3	ATPase regulator activity	2	0.0337624	FNIP1;TOR1AIP2	regulation of release of cytochrome c from mitochondria	4	0.0238329	FXN;APOPT1;BCL2L11;PMAIP1	postsynaptic density membrane	4	0.0145423	GRID1;CACNG8;SHISA9;ADAM22
signal transduction by p53 class mediator	7	0.0111811	CNOT4;BCL2;MDM4;BTG2;MEAF6;STK11;CNOT6L	structural constituent of synapse	1	0.0364421	ACTB	cellular response to endogenous stimulus	79	0.00251506	CDH5;CREBRF;RNF165;P2RX3;CAV1;ESR1;VAMP2;GLG1;DSTYK;DKK3;STC1;CYBB;ATP2B1;CREB1;SMARCC1;ACTA1;MYOCD;ACAP2;PGR;ERRFI1;PML;GRB2;REST;NDST1;LEF1;SMAD4;RARA;PAX2;SESN2;CALR;FKBP8;ATP6V1A;PRLR;PLCG1;CRB2;RORA;FGF9;MDM2;XIAP;ADCY6;SPRED1;RAP1A;ITGA2;OSBPL8;FAM210B;PTPN2;ZNF106;ITGA3;ELK1;EEF2K;LIMS1;TIAL1;LDOC1;SYAP1;MAPK1;ADCY2;HEYL;RAB10;CAMK2A;STK11;GTF2F1;ACVR2A;UFM1;AKT2;TP53;FSTL3;TGFBR1;PIAS2;AC…	Golgi vesicle transport	6	0.0370928	ATP9A;DCTN5;ARL3;ARF1;INSIG1;SEC16A	presynaptic membrane organization	2	0.025062	NLGN4X;NLGN2	stress-activated protein kinase signaling cascade	9	0.0149455	HMGB1;IRAK4;TAOK1;STK4;TMEM189-UBE2V1;MINK1;MAPK13;EPHA4;IGF1R
MAPK cascade	18	0.0113113	IRS1;HMGB1;CAV1;MET;ERRFI1;SMAD4;AKAP13;CCR5;IGFBP4;GNG3;MAPKAPK2;DIRAS2;CCL22;PIK3R2;MAP4K2;SYK;PEA15;IL2RA	regulation of cell-cell adhesion mediated by cadherin	1	0.0388249	PPM1F	negative regulation of transcription by RNA polymerase II	53	0.00266583	KCNIP3;GATAD2A;HMGB1;CAV1;ESR1;CBX5;MYOCD;VEGFA;KDM5C;E2F5;SUFU;HIC2;REST;NSD2;LEF1;SMAD4;MDM4;RARA;CBX2;BTG2;CALR;PROX1;FGF9;MDM2;BHLHE40;SRF;HES2;ZNF268;MNT;WWC1;HOXC8;NFX1;PTPN2;SUV39H1;TSHZ2;CC2D1B;HEYL;PEX2;CNBP;TP53;MIER3;E2F2;ZBTB16;NFIC;SOX7;HIF1AN;ATF7IP;KDM2B;REL;BACH2;FOXE1;GLIS3;LCOR	GTP binding	6	0.0383529	ARL3;ARF1;GNAI1;RHOA;ARL10;TUBB	postsynaptic membrane assembly	2	0.025062	NLGN4X;NLGN2	integral component of postsynaptic membrane	5	0.0158999	GRID1;SHISA9;ADAM22;NTRK3;EPHA4
response to abiotic stimulus	21	0.0137199	CAV1;PALM;BCL2;MYOCD;REST;ERRFI1;SMAD4;MDM4;LDHA;GTF2H5;STC2;RAB11B;MAPKAPK2;MTHFR;ELK1;BTG2;STK11;BAG1;CABP4;HMGCS1;GSK3B	response to endogenous stimulus	8	0.0398467	USP15;ACTB;CASTOR2;MEN1;ILK;TBXA2R;CD109;TGFBR1	termination of RNA polymerase II transcription	6	0.00289116	TTF2;PABPN1;WDR33;CSTF3;MAZ;SNRPD3	CAMKK-AMPK signaling cascade	1	0.0396208	PRKAA1	symmetric synapse	2	0.025062	NLGN4X;NLGN2	cellular response to mechanical stimulus	4	0.0165819	SLC38A2;TLR7;COL1A1;CASP2
enzyme linked receptor protein signaling pathway	19	0.0144852	IRS1;CAV1;HNF4A;MET;ANKS1A;MYOCD;ERRFI1;RPS6KA5;LEF1;SMAD4;IGFBP4;MAPKAPK2;SMAD2;ITGA3;PIK3R2;STK11;SYK;POLR2E;EFNA5	regulation of signal transduction by p53 class mediator	2	0.0404432	BRPF1;JMY	RNA polymerase II proximal promoter sequence-specific DNA binding	35	0.00365717	NONO;KCNIP3;ESR1;CREB1;SMARCC1;RFX3;MYOCD;PGR;REST;LEF1;SMAD4;SSBP2;MYCN;KLF13;RARA;NRF1;PROX1;RORA;CHD4;MAZ;BHLHE40;SRF;HES2;ELK1;MAFF;CC2D1B;GMEB1;HEYL;CREB3L2;FOSL1;TP53;NFIC;KDM2B;PRDM4;POU2F1	cellular response to hormone stimulus	9	0.0426187	STAR;ADIPOR2;NR3C1;CRY2;PIK3R2;RHOA;NCOR2;ZFP36L2;PRKAA1	postsynaptic specialization	14	0.0253867	DCC;NLGN4X;BMPR2;EEF2K;GRIN2B;SHISA9;EFNB2;CACNG7;CTNND1;MPP2;ADD2;NLGN2;NETO2;MAPK1	axon ensheathment	5	0.016991	ADAM22;NCMAP;SKI;PIKFYVE;NTRK3
Ras signaling pathway	7	0.0152955	MET;GNG3;RAB5B;ELK1;CALML3;PIK3R2;EFNA5	cellular response to monosaccharide stimulus	2	0.0415833	UBTF;MEN1	Rab protein signal transduction	9	0.00419462	RAB21;RAB7A;RAB11B;RAB5C;RAB5B;GDI1;RAB15;RAB10;RAB43	purine nucleoside triphosphate metabolic process	5	0.0427555	AK2;CYCS;RHOA;COX10;PRKAA1	integral component of postsynaptic specialization membrane	5	0.0272385	DCC;SHISA9;EFNB2;CACNG7;NLGN2	cellular response to epidermal growth factor stimulus	3	0.0175804	SNAI2;COL1A1;ZFP36L2
positive regulation of signal transduction	27	0.0154925	IRS1;HMGB1;CAV1;MET;BCL2;IL6R;MOAP1;MYOCD;SMAD4;TMEM198;AKAP13;PLAGL2;LASP1;IGFBP4;GNG3;MAPKAPK2;SMAD2;DIRAS2;CCL22;PIK3R2;MAP4K2;TSPAN14;STK11;SYK;PAG1;PEA15;GSK3B	chromatin organization	11	1.37563e-06	USP15;MYB;ACTB;PADI1;SUV39H1;UBE2N;MEN1;BRPF1;SMARCD1;PPM1F;ARID5B	synapse	68	0.00443165	EPHB1;KCNIP3;MDGA1;RAB21;P2RX3;GRID1;CACNG8;SAMD4A;SHISA9;PALM;UTRN;VAMP2;VAMP1;MAPK14;ERC1;PAK3;ATP2B1;CRTC1;STX2;IGF2BP1;YWHAZ;RTN3;NLGN2;FXR1;CRIPT;ADD1;SLC6A17;SLC29A2;IQSEC2;RPH3A;GNG3;RAB11B;SLC29A1;GRIN2B;PLCG1;RAB5B;MDM2;CAPRIN1;DVL1;RAP1A;ITGA2;ITGA3;MTHFR;ELK1;EEF2K;PRRT2;SYAP1;MAPK1;RNF216;RAB15;ANK1;RAB10;MKLN1;ADGRL1;FOSL1;CAMK2A;TLN2;NTSR1;CABP4;STX1B;BMPR2;USP14;TPRG1L;STX6;EFNA5;K…	synaptic vesicle budding	1	0.0460711	ARF1	positive regulation of transcription by RNA polymerase II	37	0.0282935	MYB;HMGB1;RPS6KA3;ELK4;CREBRF;MAVS;CDK9;BMPR2;IKZF3;HOXB5;NFATC2;BMP7;CTCFL;ARNT;POU2F2;ZBED1;F2RL1;GMEB1;HEYL;MLXIP;REL;POU2F1;EZH1;ETS1;ONECUT1;EN2;HOXC13;IKBKG;MICAL2;GATA2;KLF13;ACVR1B;NFIB;KLF6;NPNT;NR2C2;MYO6	ATPase binding	4	0.0180363	CAV1;ESR1;AR;SNU13
positive regulation of biosynthetic process	32	0.0159173	IRS1;HMGB1;HNF4A;MET;RFX3;MYOCD;REST;KPNA6;FXR1;RPS6KA5;PPP1R12A;LEF1;SMAD4;MYCN;ARPP19;PHF19;ATXN7L3;POU2F1;ZBTB20;PLAGL2;MAPKAPK2;SATB2;SMAD2;ELK1;MNT;HEYL;PIK3R2;SYK;LARP1;NFIC;TP53INP2;SPN	histone modification	9	1.41904e-06	USP15;MYB;PADI1;SUV39H1;UBE2N;MEN1;BRPF1;PPM1F;ARID5B	cadherin binding	24	0.00465224	DDX6;CDH5;ERC1;ESYT2;EIF4H;YWHAZ;LDHA;ADD1;BZW1;LASP1;HDLBP;RAB11B;PKP1;PARVA;OLA1;ZC3H15;SERBP1;RAB10;MPRIP;ZC3HAV1;GAPVD1;LARP1;EHD1;SNX9	late endosome to lysosome transport	1	0.0460711	ARF1	postsynaptic density membrane	5	0.0286562	DCC;GRIN2B;SHISA9;EFNB2;CACNG7	intrinsic component of postsynaptic membrane	5	0.018719	GRID1;SHISA9;ADAM22;NTRK3;EPHA4
glutamatergic synapse	9	0.0166988	OPHN1;FXR1;SYT7;NPTXR;SLC6A17;RNF216;SHISA9;FRMPD4;GSK3B	covalent chromatin modification	9	1.78988e-06	USP15;MYB;PADI1;SUV39H1;UBE2N;MEN1;BRPF1;PPM1F;ARID5B	response to extracellular stimulus	35	0.00481621	ULK2;P2RX3;CDKN1A;STC1;CYBB;ATP2B1;CREB1;LIPG;ACTA1;MYOCD;LDHA;RARA;PAX2;SESN2;PROX1;SORD;MDM2;PIK3C2B;SRF;ITGA2;WNT9B;MTHFR;MAPK1;FOSL1;LRAT;TBXA2R;BCAS3;TP53;AHCY;RRAGD;LARP1;BMPR2;SSTR2;FADS1;WIPI2	calmodulin dependent kinase signaling pathway	1	0.0460711	PRKAA1	response to extracellular stimulus	19	0.0286647	BMPR2;G6PC;SIK2;BMP7;ENSA;PSPH;ATG14;LRAT;LDLR;SLC38A2;FAM107A;TRPC3;CBL;HMGCS1;GNAI2;MTMR3;PMAIP1;MAPK1;CHSY1	stress-activated MAPK cascade	8	0.0232509	HMGB1;IRAK4;TAOK1;TMEM189-UBE2V1;MINK1;MAPK13;EPHA4;IGF1R
regulation of anion transport	4	0.0180571	GRM7;RAB11B;SYK;TCAF1	chromosome organization	12	1.50036e-05	USP15;MYB;ACTB;PADI1;SUV39H1;UBE2N;MEN1;BRPF1;SMARCD1;GEN1;PPM1F;ARID5B	AMPK signaling pathway	12	0.00529939	PPP2R1B;CREB1;RAB11B;PRKAB1;EEF2K;RAB10;CREB3L2;STK11;AKT2;ACACA;PIK3R1;CAB39	G protein-coupled receptor kinase activity	1	0.0460711	GRK3	integral component of postsynaptic density membrane	4	0.0290309	DCC;SHISA9;EFNB2;CACNG7	RNA polymerase II basal transcription factor binding	2	0.0255518	ESR1;AR
modulation of chemical synaptic transmission	10	0.0183013	OPHN1;GRM7;CELF4;SYT7;NPTXR;IQSEC2;PRRT2;RNF216;SHISA9;GSK3B	cellular response to DNA damage stimulus	9	0.000133071	SUV39H1;PHLDA3;SUSD6;UBE2N;MEN1;TAOK1;GEN1;JMY;INIP	activation of MAPK activity	14	0.00536964	MAP3K9;HACD3;MAPK14;PAK3;DUSP9;GNG3;MAPKAPK2;MAPK1;UBE2N;MAP4K2;MAPK8IP3;S1PR2;SYK;TAOK1	G protein-coupled serotonin receptor binding	1	0.0460711	GNAI1	purine nucleotide metabolic process	19	0.0291564	PDK1;FXN;PANK2;ARNT;PDP2;THEM4;DHTKD1;CYCS;PANK3;ACSL6;ELOVL5;GPI;PFKFB3;HMGCS1;ENTPD5;PGM2L1;SCD;RAN;PFKFB2	synaptic vesicle endocytosis	3	0.0259452	OPHN1;SYT7;FCHO2
regulation of trans-synaptic signaling	10	0.0185752	OPHN1;GRM7;CELF4;SYT7;NPTXR;IQSEC2;PRRT2;RNF216;SHISA9;GSK3B	regulation of protein serine/threonine kinase activity	7	0.000201183	ACTB;UBE2N;MEN1;ILK;TAOK1;TGFBR1;MAP3K9	mTOR signaling pathway	14	0.00536964	ULK2;GRB2;RPS6KA3;WNT3;SESN2;ATP6V1A;DVL1;WNT9B;MAPK1;STK11;AKT2;PIK3R1;RRAGD;CAB39	calcium-dependent protein serine/threonine phosphatase activity	1	0.0460711	PPM1F	RNA polymerase II regulatory region sequence-specific DNA binding	25	0.0294796	MYB;ELK4;CREBRF;CDK9;IKZF3;HOXB5;HES2;NFATC2;CTCFL;POU2F2;ZBED1;GMEB1;HEYL;KDM2B;MLXIP;REL;POU2F1;BCL6;ETS1;ARID5B;GATA2;KLF13;NFIB;KLF6;NR2C2	presynaptic endocytosis	3	0.0259452	OPHN1;SYT7;FCHO2
DNA-binding transcription factor activity, RNA polymerase II-specific	27	0.0187817	POGZ;HNF4A;HOXC8;FOXN3;RFX3;MYOCD;REST;LEF1;SMAD4;MYCN;POU2F1;ZBTB20;PLAGL2;ZHX3;SATB2;SMAD2;ELK1;MNT;BTG2;HEYL;HES2;NFIC;ZNF417;ZNF621;ZNF512B;EMX2;LCOR	four-way junction DNA binding	2	0.000614424	MEN1;GEN1	cellular response to abiotic stimulus	24	0.00564244	TMEM109;PALM;CDKN1A;MAPK14;ERRFI1;GRB2;REST;OXSR1;MFAP4;RAB11B;MDM2;ITGA2;ACTR5;ELK1;STK11;TNFSF14;AKT2;TP53;PIK3R1;CERS1;PDE6A;BAK1;GTF2H5;CAB39	AMP-activated protein kinase activity	1	0.0460711	PRKAA1	regulation of postsynaptic neurotransmitter receptor activity	2	0.0296256	NPTXR;SHISA9	integral component of postsynaptic density membrane	3	0.0259452	GRID1;SHISA9;ADAM22
regulation of MAPK cascade	15	0.019615	HMGB1;CAV1;MET;ERRFI1;SMAD4;AKAP13;IGFBP4;GNG3;MAPKAPK2;DIRAS2;CCL22;PIK3R2;MAP4K2;SYK;PEA15	positive regulation of apoptotic process	7	0.000663969	MYB;UBE2Z;PHLDA3;TGFBR1;MAP3K9;PPM1F;JMY	cellular response to environmental stimulus	24	0.00564244	TMEM109;PALM;CDKN1A;MAPK14;ERRFI1;GRB2;REST;OXSR1;MFAP4;RAB11B;MDM2;ITGA2;ACTR5;ELK1;STK11;TNFSF14;AKT2;TP53;PIK3R1;CERS1;PDE6A;BAK1;GTF2H5;CAB39	cAMP-dependent protein kinase activity	1	0.0460711	PRKAA1	vesicle-mediated transport	57	0.0296697	HMGB1;NLGN4X;HOOK3;PIKFYVE;SYNRG;RAB27A;MESD;EEF2K;KCMF1;LMAN2L;CRK;LRP10;HEATR5A;GRK3;APOL1;F2RL1;WIPF3;ATG14;RAB11FIP1;HPSE;AP1S1;TSPAN14;C17orf75;LDLR;WIPF2;EFNB2;CACNG7;BTK;LIMK1;GPI;GSK3B;PTGES2;EEF1A1;CD109;GPR107;RALBP1;CBL;TEX261;CDC42SE1;QSOX1;GNAI2;GATA2;NLGN2;CAB39;TRIM72;GOLGA3;NFASC;RAB33B;TYRO3;TRAPPC2;LAMTOR1;RAB5B;MAPK1;EPS15L1;MYO6;CYB5R3;ASGR2	potassium channel regulator activity	3	0.0259452	CAV1;ARPP19;ABCC9
RNA polymerase II transcription factor binding	5	0.0202032	HNF4A;MYOCD;SMAD4;ELK1;GSK3B	cell junction organization	5	0.000665888	ACTB;ILK;TGFBR1;PPM1F;CADM2	Estrogen signaling pathway	13	0.00590722	ESR1;CREB1;PGR;GRB2;RARA;FKBP5;ADCY6;MAPK1;CALML3;ADCY2;CREB3L2;AKT2;PIK3R1	GTPase activity	5	0.0477517	ARL3;ARF1;GNAI1;RHOA;TUBB	postsynaptic specialization membrane	6	0.0297291	DCC;GRIN2B;SHISA9;EFNB2;CACNG7;NLGN2	synaptic transmission, glutamatergic	4	0.0264816	OPHN1;GRID1;CACNG8;GLUL
axon initial segment	2	0.0204941	NFASC;ANK1	positive regulation of programmed cell death	7	0.00069029	MYB;UBE2Z;PHLDA3;TGFBR1;MAP3K9;PPM1F;JMY	signal transduction by p53 class mediator	18	0.00595408	CSNK2A1;TMEM109;CDKN1A;MAPK14;PML;DYRK2;CDKN1B;MDM4;BTG2;CNOT6L;SESN2;MDM2;SPRED1;TFDP2;MEAF6;STK11;TP53;E2F2	basal RNA polymerase II transcription machinery binding	2	0.0493494	AGO1;ELP2	immune response-regulating cell surface receptor signaling pathway involved in phagocytosis	5	0.0301197	CRK;WIPF3;WIPF2;LIMK1;MAPK1	cellular response to transforming growth factor beta stimulus	7	0.0265815	CAV1;SKI;LIMS1;SKIL;RNF111;COL1A1;ZFP36L2
transport vesicle	9	0.0244082	COPZ1;SYT7;SLC6A17;RPH3A;RAB11B;RAB5B;PTPRN2;PRRT2;STX6	regulation of organelle organization	10	0.000771697	MYB;UBE2N;ILK;TAOK1;UBL5;TGFBR1;GEN1;PPM1F;JMY;STAM	transmembrane receptor protein tyrosine kinase signaling pathway	43	0.00622759	EPHB1;SHB;SH2B3;DSTYK;MAPK14;CCBE1;PAK3;CYBB;PTK6;SMARCC1;MYOCD;VEGFA;ERRFI1;GRB2;NDST1;RPS6KA5;VAV3;ANKS1A;RAB7A;DDR1;IGFBP4;NRG4;ATP6V1A;PRLR;GRIN2B;PLCG1;FGF9;MAPKAPK2;SPRED1;OSBPL8;MYORG;PTPN2;ZNF106;TIAL1;AP2M1;EFNA3;MAPK1;GTF2F1;AKT2;SYK;PIK3R1;POLR2E;EFNA5	regulation of cellular amide metabolic process	12	1.11167e-05	TNRC6B;ORMDL2;TNRC6C;RHOA;AGO1;RBM8A;ZFP36L2;EPHA4;PRKAA1;QKI;SECISBP2L;IREB2	positive regulation of release of cytochrome c from mitochondria	3	0.0305844	APOPT1;BCL2L11;PMAIP1	transcription initiation from RNA polymerase II promoter	6	0.0285076	HMGB1;CDKN1A;ESR1;NR2C2;AR;GTF2H1
membrane fusion	5	0.0249662	PPIA;SYT7;CCR5;PRRT2;STX6	regulation of kinase activity	8	0.000914996	ACTB;UBE2N;MEN1;ILK;TAOK1;TGFBR1;MAP3K9;PPM1F	modulation of chemical synaptic transmission	29	0.00695037	EPHB1;P2RX3;GRID1;CACNG8;SHISA9;VAMP2;VAMP1;CRTC1;CREB1;CELF4;NLGN2;RARA;IQSEC2;GRIN2B;PLCG1;RASGRF1;SRF;DVL1;RAP1A;PRRT2;MAPK1;RNF216;CAMK2A;NTSR1;S1PR2;STX1B;TPRG1L;KCNJ10;NPTXR	micro-ribonucleoprotein complex	3	4.68768e-05	TNRC6B;TNRC6C;AGO1	postsynaptic density	13	0.0306942	DCC;NLGN4X;BMPR2;EEF2K;GRIN2B;SHISA9;EFNB2;CACNG7;CTNND1;MPP2;ADD2;NETO2;MAPK1	intrinsic component of postsynaptic density membrane	3	0.0300767	GRID1;SHISA9;ADAM22
cellular response to stress	30	0.0252739	HMGB1;SOD2;CAV1;MET;CNOT4;BCL2;CDK6;FOXN3;MOAP1;ZDHHC16;ERRFI1;MDM4;GTF2H5;STC2;MAPKAPK2;BTG2;PIK3R2;MAP4K2;STK11;BAG1;SYK;CBX5;POLR2E;VASH1;CNOT6L;TNRC6A;SMG1;PEA15;USP7;GSK3B	SMAD binding	3	0.00101531	USP15;MEN1;TGFBR1	regulation of trans-synaptic signaling	29	0.00717632	EPHB1;P2RX3;GRID1;CACNG8;SHISA9;VAMP2;VAMP1;CRTC1;CREB1;CELF4;NLGN2;RARA;IQSEC2;GRIN2B;PLCG1;RASGRF1;SRF;DVL1;RAP1A;PRRT2;MAPK1;RNF216;CAMK2A;NTSR1;S1PR2;STX1B;TPRG1L;KCNJ10;NPTXR	regulation of protein complex assembly	12	4.8159e-05	FNIP1;ULK1;ARF1;TAL1;RHOA;TMOD2;FBLIM1;INSIG1;JMY;DDB1;PRKAA1;TRAF3IP1	activation of MAPKK activity	4	0.0309012	MAP3K2;CRK;TGFBR1;MAP3K9	cellular response to cytokine stimulus	20	0.0302264	HMGB1;SOD2;CAV1;CDKN1A;IRAK4;POU2F1;TMEM189-UBE2V1;ETV3;MAPK13;LMNB1;LIMS1;FER;PADI2;PPIA;IL6R;COL1A1;IFNAR2;ZFP36L2;OCLN;SOX2
RNA polymerase II core promoter sequence-specific DNA binding	2	0.026703	REST;POU2F1	transforming growth factor beta receptor signaling pathway	4	0.00104663	USP15;MEN1;CD109;TGFBR1	positive regulation of RNA polymerase II transcriptional preinitiation complex assembly	3	0.00745692	ESR1;CREB1;TP53	negative regulation of cellular amide metabolic process	7	5.33383e-05	TNRC6B;ORMDL2;TNRC6C;AGO1;ZFP36L2;PRKAA1;IREB2	RNA polymerase II regulatory region DNA binding	25	0.0320608	MYB;ELK4;CREBRF;CDK9;IKZF3;HOXB5;HES2;NFATC2;CTCFL;POU2F2;ZBED1;GMEB1;HEYL;KDM2B;MLXIP;REL;POU2F1;BCL6;ETS1;ARID5B;GATA2;KLF13;NFIB;KLF6;NR2C2	DNA damage response, signal transduction by p53 class mediator resulting in cell cycle arrest	3	0.0330121	CDKN1A;CASP2;CNOT6L
activation of MAPK activity	5	0.026923	GNG3;MAPKAPK2;MAP4K2;SYK;PEA15	positive regulation of cell death	7	0.00109512	MYB;UBE2Z;PHLDA3;TGFBR1;MAP3K9;PPM1F;JMY	positive regulation of transcription initiation from RNA polymerase II promoter	4	0.00769145	ESR1;CREB1;SRF;TP53	Guanosine-5'-Diphosphate	4	9.66015e-05	ARL3;ARF1;GNAI1;RHOA	asymmetric synapse	13	0.0334664	DCC;NLGN4X;BMPR2;EEF2K;GRIN2B;SHISA9;EFNB2;CACNG7;CTNND1;MPP2;ADD2;NETO2;MAPK1	RNA polymerase II core promoter sequence-specific DNA binding	2	0.0332029	POU2F1;REST
asymmetric synapse	8	0.0270698	PALM;GRM7;FXR1;GNG3;PRRT2;SHISA9;SRCIN1;FRMPD4	regulation of actin cytoskeleton organization	5	0.00111885	ILK;TAOK1;TGFBR1;PPM1F;JMY	response to abiotic stimulus	65	0.00786586	EPHB1;TMEM109;P2RX3;METRNL;CAV1;PALM;CDKN1A;MAPK14;STC1;CYBB;ATP2B1;CRTC1;PDK3;CREB1;ACTA1;MYOCD;VEGFA;ERRFI1;PML;GRB2;REST;OXSR1;CDKN1B;SMAD4;MDM4;LDHA;MFAP4;BTG2;ATP6V1A;CCL11;RAB11B;SLC29A1;SORD;RORA;MDM2;MAPKAPK2;BHLHE40;SRF;ITGA2;ACTR5;MTHFR;ELK1;SUV39H1;EEF2K;MAPK1;FOSL1;STK11;TNFSF14;GMPR;XRCC2;NTSR1;AKT2;SLC11A2;PLAC8;TP53;BAG1;AHCY;CABP4;PIK3R1;CERS1;HIF1AN;PDE6A;BAK1;GTF2H5;CAB39	miRNA mediated inhibition of translation	3	0.000101899	TNRC6B;TNRC6C;AGO1	regulation of NIK/NF-kappaB signaling	6	0.0335954	HMGB1;TSPAN6;TIRAP;BMP7;LIMS1;SAMD5	regulation of response to external stimulus	16	0.0334775	METRNL;HMGB1;CAV1;CDKN1A;TLR7;ESR1;MAPK13;ETS1;SNAI2;NTRK3;PADI2;IL6R;PPM1F;EPHA4;TRAF3IP1;C5orf30
DNA damage response, signal transduction by p53 class mediator	4	0.0297509	CNOT4;MDM4;BTG2;CNOT6L	positive regulation of protein serine/threonine kinase activity	5	0.00121504	UBE2N;ILK;TAOK1;TGFBR1;MAP3K9	Cholinergic synapse	11	0.00846855	CREB1;GNG3;ADCY6;CAMK2G;GNB4;MAPK1;ADCY2;CREB3L2;CAMK2A;AKT2;PIK3R1	negative regulation of translation, ncRNA-mediated	3	0.000101899	TNRC6B;TNRC6C;AGO1	regulation of immune response to tumor cell	2	0.0344906	HMGB1;PVR	negative regulation of potassium ion transmembrane transport	2	0.0359281	CAB39;CAV1
Wnt signaling pathway	10	0.0321904	CAV1;MET;LEF1;TMEM198;IGFBP4;TNRC6B;ITGA3;STK11;TNRC6A;GSK3B	transmembrane receptor protein serine/threonine kinase signaling pathway	5	0.00124843	USP15;MEN1;ILK;CD109;TGFBR1	regulation of protein localization to synapse	4	0.00929442	NLGN2;IQSEC2;DVL1;RAP1A	regulation of translation, ncRNA-mediated	3	0.000101899	TNRC6B;TNRC6C;AGO1	regulation of ATP biosynthetic process	4	0.0348502	ARNT;PFKFB3;ENTPD5;PFKFB2	modulation of chemical synaptic transmission	10	0.0371523	OPHN1;P2RX3;GRID1;CACNG8;SHISA9;PLCB4;SYT7;GLUL;KCNB1;EPHA4
RNA polymerase II transcription factor complex	5	0.0326104	LEF1;SMAD4;POU2F1;GTF2H5;SMAD2	transforming growth factor beta binding	2	0.00133693	CD109;TGFBR1	RNA polymerase II distal enhancer sequence-specific DNA binding	10	0.00975128	NONO;SPIB;CREB1;SMARCC1;CHD4;BHLHE40;TP53;ZBTB16;REL;BACH2	cell division	13	0.000151006	NR3C1;ARL3;ARF1;GNAI1;CKS1B;TAL1;RHOA;TUBB;TXNIP;SPC24;ZFP36L2;MCMBP;ANXA11	intrinsic component of postsynaptic density membrane	4	0.0348502	DCC;SHISA9;EFNB2;CACNG7	regulation of trans-synaptic signaling	10	0.0376649	OPHN1;P2RX3;GRID1;CACNG8;SHISA9;PLCB4;SYT7;GLUL;KCNB1;EPHA4
positive regulation of transcription by RNA polymerase II	20	0.0363377	HMGB1;HNF4A;MET;RFX3;MYOCD;REST;KPNA6;RPS6KA5;PPP1R12A;LEF1;SMAD4;MYCN;POU2F1;PLAGL2;SATB2;SMAD2;ELK1;HEYL;PIK3R2;NFIC	regulation of cytoskeleton organization	6	0.00137123	ILK;TAOK1;TGFBR1;GEN1;PPM1F;JMY	positive regulation of intracellular transport	17	0.00975686	RAB21;VAMP2;MAPK14;HPS4;MDM2;SAR1B;TARDBP;MAPK1;SAR1A;BCAS3;AKT2;TP53;SYK;PIK3R1;MIEF1;EHD1;VAMP8	regulation of cellular component biogenesis	17	0.000182497	FNIP1;ORMDL2;ULK1;ARF1;TAL1;RHOA;TMOD2;FBLIM1;PIKFYVE;INSIG1;NTRK3;PPM1F;JMY;DDB1;PRKAA1;TRAF3IP1;AKIRIN1	regulation of RNA polymerase II transcriptional preinitiation complex assembly	2	0.0396409	HMGB1;ATF7IP	release of cytochrome c from mitochondria	3	0.0376842	SOD2;FXN;BID
ion channel regulator activity	4	0.0364393	CAV1;GRM7;ARPP19;CABP4	DNA repair	6	0.00153206	UBE2N;MEN1;TAOK1;GEN1;JMY;INIP	Wnt signaling pathway	13	0.00990754	CCND2;CSNK2A1;LEF1;SMAD4;WNT3;CAMK2G;DVL1;SENP2;WNT9B;FOSL1;CAMK2A;TP53;CSNK1E	protein tyrosine kinase binding	5	0.000214592	PIK3R2;PTPN14;EPHA4;DAZAP2;FRS2	MAPK signaling pathway	12	0.0396784	MAP3K2;RPS6KA3;ELK4;PPP5D1;CRK;IRAK4;FGFR1;CACNG7;IKBKG;TGFBR1;STK4;MAPK1	regulation of Wnt signaling pathway	8	0.0380049	TMEM237;CAV1;ESR1;STK4;SNAI2;SKI;COL1A1;SOX2
positive regulation of MAPK cascade	11	0.0421861	HMGB1;MET;AKAP13;IGFBP4;GNG3;MAPKAPK2;DIRAS2;CCL22;MAP4K2;SYK;PEA15	DNA secondary structure binding	2	0.00159236	MEN1;GEN1	nuclear transport	25	0.0106782	PABPN1;KPNA6;MAPK14;UHMK1;PHAX;NUP43;WDR33;CASC3;PML;SUFU;PPP1R12A;DDX19B;CALR;FGF9;MDM2;TARDBP;RSRC1;MAPK1;SNRPD3;TP53;SYK;FYTTD1;PIK3R1;XPO5;BACH2	regulation of nuclear-transcribed mRNA catabolic process, deadenylation-dependent decay	3	0.000223991	TNRC6B;TNRC6C;ZFP36L2	RNA polymerase II proximal promoter sequence-specific DNA binding	18	0.0439096	MYB;ELK4;CDK9;HES2;NFATC2;CTCFL;POU2F2;ZBED1;GMEB1;HEYL;KDM2B;POU2F1;ETS1;GATA2;KLF13;NFIB;KLF6;NR2C2	RNA polymerase II preinitiation complex assembly	2	0.0387365	HMGB1;ESR1
syntaxin binding	3	0.0430851	SYT7;PRRT2;STX6	double-stranded DNA binding	8	0.00163273	MYB;ACTB;UBTF;SUV39H1;PKNOX2;MEN1;GEN1;ARID5B	transcription initiation from RNA polymerase II promoter	15	0.0127268	HMGB1;CDKN1A;ESR1;CREB1;PGR;RARA;RORA;MAZ;SRF;GTF2F1;TP53;E2F2;POLR2E;ATF7IP;GTF2H5	positive regulation of nuclear-transcribed mRNA catabolic process, deadenylation-dependent decay	3	0.000223991	TNRC6B;TNRC6C;ZFP36L2	negative regulation of androgen receptor signaling pathway	2	0.0450609	PIAS2;HEYL	postsynaptic specialization membrane	4	0.0392904	GRID1;CACNG8;SHISA9;ADAM22
regulation of vesicle fusion	2	0.0436529	SYT7;PRRT2	JNK cascade	4	0.0018345	UBE2N;MEN1;TAOK1;MAP3K9	regulation of cellular response to growth factor stimulus	19	0.0142104	RNF165;CAV1;GLG1;DSTYK;DKK3;CCBE1;MYOCD;VEGFA;SMAD4;FKBP8;CRB2;FGF9;XIAP;ITGA3;STK11;ACVR2A;FSTL3;TGFBR1;BMPR2	organelle envelope	19	0.000253579	TMEM170A;TNPO1;STAR;TOR1AIP2;AK2;SCRN1;MRPS18B;DCTN5;MCL1;ULK1;CYCS;TMEM43;TUBB;TXNIP;MRPS21;COX10;EPHA4;AKIRIN1;ANXA11	Glutamatergic synapse	6	0.0470882	GNB4;GRK3;GRIN2B;SLC38A2;GNAI2;MAPK1	regulation of calcium ion-dependent exocytosis	4	0.0404921	RPH3AL;REST;SYT7;KCNB1
snRNA transcription by RNA polymerase II	3	0.0446297	POU2F1;RPRD2;POLR2E	wound healing	6	0.0018788	ACTB;ILK;TBXA2R;TRPC3;CD109;TGFBR1	synaptic vesicle fusion to presynaptic active zone membrane	4	0.0153524	VAMP1;STX2;PRRT2;STX1B	envelope	19	0.000253579	TMEM170A;TNPO1;STAR;TOR1AIP2;AK2;SCRN1;MRPS18B;DCTN5;MCL1;ULK1;CYCS;TMEM43;TUBB;TXNIP;MRPS21;COX10;EPHA4;AKIRIN1;ANXA11	enzyme linked receptor protein signaling pathway	31	0.0475909	IRS1;USP15;BMPR2;SIK2;BMP7;LRIG2;ARNT;CRK;GRIN2B;DSTYK;FGFR1;EFNB2;ONECUT1;ARID5B;CD109;SDC2;FKBP1A;RHBDF2;CBL;PEG10;GPRC5A;GNAI2;TGFBR1;TRIM72;PPM1L;ACVR1B;SOCS7;MAPK1;EPS15L1;NPNT;SGPL1	activation of MAPK activity	5	0.0415116	TAOK1;TMEM189-UBE2V1;NTRK3;FRS2;PRKAA1
ion channel binding	4	0.0485648	CAV1;CABP4;TCAF1;ANK1	regulation of actin filament-based process	5	0.00192649	ILK;TAOK1;TGFBR1;PPM1F;JMY	enzyme regulator activity	58	0.0156863	CCND2;SERPINA4;HACD3;PPP1R1A;HMGB1;CAV1;CDKN1A;PPP2R1B;ESR1;ARPP19;ACAP2;ERRFI1;PHACTR2;CDKN1B;PPP1R12A;CCNE2;LEF1;VAV3;RPS6KA3;PTPA;RTKN;PGAM5;RGS6;SESN2;ARHGAP31;PRLR;PPP1R11;CRB2;XIAP;GM2A;SPRED1;PPP1R14C;STK4;CST9;PSME3;GPSM2;RACGAP1;GDI1;CALML3;STK11;GTF2F1;TNFSF14;PSMF1;GAPVD1;BCAS3;TOR1AIP1;RABGAP1L;BAG1;PRPSAP1;CCNT1;PIK3R1;PRKAR2A;USP14;A2ML1;EFNA5;TNFAIP8;TAOK1;CAB39	organelle envelope lumen	5	0.000299716	STAR;AK2;CYCS;TUBB;TXNIP	ion channel inhibitor activity	3	0.0486912	ENSA;FKBP1A;WNK3	postsynapse	13	0.0415576	OPHN1;P2RX3;GRID1;CACNG8;SHISA9;PALM;PLCB4;ADAM22;CD3E;MINK1;NTRK3;KCNB1;EPHA4
Rab protein signal transduction	3	0.0494266	RAB11B;RAB5B;GDI1	regulation of transferase activity	8	0.0019356	ACTB;UBE2N;MEN1;ILK;TAOK1;TGFBR1;MAP3K9;PPM1F	Rap1 signaling pathway	16	0.0157713	F2RL3;MAPK14;VEGFA;GRIN2B;PLCG1;FGF9;ADCY6;RAP1A;EFNA3;MAPK1;CALML3;ADCY2;TLN2;AKT2;PIK3R1;EFNA5	Longevity regulating pathway	5	0.000333113	ADIPOR2;PIK3R2;ULK1;ATG13;PRKAA1	phosphotransferase activity, alcohol group as acceptor	41	7.46625e-07	IRS1;PDK1;MAP3K2;RPS6KA3;PANK2;CDK9;BMPR2;PIKFYVE;TRPM7;G6PC;SIK2;SMG1;EEF2K;MYLK3;DGKH;GRK3;TESK2;IRAK4;DSTYK;FGFR1;PANK3;PDIK1L;EFNB2;BTK;LIMK1;GSK3B;SBK1;PFKFB3;TGFBR1;CAB39;NOL9;MAP3K9;STK4;PGM2L1;TYRO3;ACVR1B;WNK3;MAPK1;PFKFB2;UHMK1;PIM3	DNA damage response, signal transduction by p53 class mediator	4	0.0429576	CDKN1A;SNAI2;CASP2;CNOT6L
negative regulation of gene expression	45	5.36204e-08	HMGB1;CAV1;HOXC8;CNOT4;GAS1;ATXN1L;FOXN3;RFX3;MYOCD;CELF4;REST;FXR1;RPS6KA5;LEF1;SMAD4;MDM4;MYCN;PHF19;POU2F1;STC2;ZBTB20;CBX2;TNRC6B;ZHX3;BASP1;MAPKAPK2;SATB2;SMAD2;SYNCRIP;DDX6;MNT;BTG2;HEYL;HES2;CBX5;LARP1;POLR2E;NFIC;ZNF417;CNOT6L;TNRC6A;SMG1;RBM8A;CBX6;LCOR	positive regulation of transmembrane receptor protein serine/threonine kinase signaling pathway	3	0.00198625	MEN1;ILK;TGFBR1	cellular response to interleukin-2	3	0.0161509	PTPN2;IL2RA;SYK	regulation of translation	9	0.000408782	TNRC6B;TNRC6C;RHOA;AGO1;RBM8A;ZFP36L2;QKI;SECISBP2L;IREB2	transferase activity, transferring phosphorus-containing groups	47	1.92519e-06	IRS1;PDK1;MAP3K2;RPS6KA3;PNPT1;PANK2;CDK9;BMPR2;PIKFYVE;USP14;TRPM7;G6PC;SIK2;SMG1;EEF2K;MYLK3;DGKH;GRK3;TESK2;IRAK4;DSTYK;FGFR1;PANK3;PDIK1L;EFNB2;BTK;TERF1;LIMK1;GSK3B;SBK1;PFKFB3;TGFBR1;CAB39;NOL9;COL4A3BP;MAP3K9;STK4;PGM2L1;TYRO3;ACVR1B;WNK3;CDIPT;MAPK1;PFKFB2;UHMK1;SAMD8;PIM3	response to abiotic stimulus	21	0.0431545	CAB39;SLC38A2;P2RX3;METRNL;CAV1;PALM;CDKN1A;TLR7;REST;MTHFR;SUV39H1;MAPK13;DNMT3B;ETS1;SPRTN;SNAI2;HMGA2;COL1A1;DDB1;CASP2;PRKAA1
regulation of cellular catabolic process	27	1.10113e-07	MYLIP;OPHN1;IRS1;HMGB1;CAV1;SPTLC2;MET;MFSD8;TPCN2;BCL2;FXR1;ZBTB20;TNRC6B;MAPKAPK2;SYNCRIP;PSME3;BTG2;PIK3R2;STK11;PHKG2;LARP1;CNOT6L;TNRC6A;TP53INP2;PIP4K2B;USP7;GSK3B	protein N-terminus binding	3	0.00215926	SUV39H1;MEN1;HYPK	vesicle fusion to plasma membrane	4	0.017814	VAMP1;STX2;PRRT2;STX1B	posttranscriptional regulation of gene expression	11	0.000437569	TNPO1;TNRC6B;TNRC6C;RHOA;AGO1;NCOR2;RBM8A;ZFP36L2;QKI;SECISBP2L;IREB2	kinase activity	41	5.00569e-06	IRS1;PDK1;MAP3K2;RPS6KA3;PANK2;CDK9;BMPR2;PIKFYVE;TRPM7;SIK2;SMG1;EEF2K;MYLK3;DGKH;GRK3;TESK2;IRAK4;DSTYK;FGFR1;PANK3;PDIK1L;EFNB2;BTK;LIMK1;GSK3B;SBK1;PFKFB3;TGFBR1;CAB39;NOL9;COL4A3BP;MAP3K9;STK4;PGM2L1;TYRO3;ACVR1B;WNK3;MAPK1;PFKFB2;UHMK1;PIM3	negative regulation of response to external stimulus	8	0.0431651	METRNL;CDKN1A;ETS1;SNAI2;PADI2;EPHA4;TRAF3IP1;C5orf30
regulation of catabolic process	29	1.39434e-07	MYLIP;OPHN1;IRS1;HMGB1;SF3B3;CAV1;SPTLC2;MET;MFSD8;TPCN2;BCL2;FXR1;MDM4;ZBTB20;TNRC6B;MAPKAPK2;SYNCRIP;PSME3;BTG2;PIK3R2;STK11;PHKG2;LARP1;CNOT6L;TNRC6A;TP53INP2;PIP4K2B;USP7;GSK3B	regulation of transmembrane receptor protein serine/threonine kinase signaling pathway	4	0.00224123	MEN1;ILK;CD109;TGFBR1	positive regulation of MAPK cascade	34	0.0185558	EPHB1;MAP3K9;HACD3;HMGB1;DSTYK;MAPK14;PAK3;GPR37L1;VEGFA;NDST1;KLHDC10;DDR1;IGFBP4;DUSP9;GNG3;SH3RF1;CCL11;FGF9;MAPKAPK2;DHX33;RAP1A;WWC1;DIRAS2;CCL22;MAPK1;UBE2N;MAP4K2;MAPK8IP3;S1PR2;SYK;TGFBR1;GPR55;SAMD5;TAOK1	regulation of cellular catabolic process	14	0.000616902	TNPO1;TNRC6B;PIK3R2;VPS13D;TNRC6C;MCL1;ULK1;TRIM65;TRIM67;ATG13;PIKFYVE;ZFP36L2;EPHA4;PRKAA1	protein serine/threonine kinase activity	26	1.55094e-05	MAP3K2;RPS6KA3;CDK9;BMPR2;TRPM7;SIK2;SMG1;EEF2K;MYLK3;GRK3;TESK2;IRAK4;DSTYK;PDIK1L;LIMK1;GSK3B;SBK1;TGFBR1;CAB39;MAP3K9;STK4;ACVR1B;WNK3;MAPK1;UHMK1;PIM3	cellular response to steroid hormone stimulus	7	0.0433709	REST;ESR1;NR2C2;AR;DNMT3B;PADI2;ZFP36L2
negative regulation of macromolecule biosynthetic process	38	4.325e-07	HMGB1;CAV1;HOXC8;ATXN1L;FOXN3;RFX3;MYOCD;CELF4;REST;FXR1;ERRFI1;RPS6KA5;LEF1;SMAD4;MDM4;POU2F1;ZBTB20;CBX2;TNRC6B;TOB2;ZHX3;BASP1;SATB2;SMAD2;SYNCRIP;MNT;BTG2;HEYL;HES2;CBX5;LARP1;NFIC;ZNF417;CNOT6L;TNRC6A;CBX6;GSK3B;LCOR	ameboidal-type cell migration	5	0.00240634	ILK;TBXA2R;TGFBR1;PPM1F;ARID5B	cellular response to hormone stimulus	41	0.0207426	CREBRF;CAV1;ESR1;VAMP2;STC1;ATP2B1;CREB1;SMARCC1;PGR;ERRFI1;GRB2;REST;LEF1;RARA;CALR;ATP6V1A;PRLR;RORA;MDM2;ADCY6;ITGA2;OSBPL8;FAM210B;PTPN2;ZNF106;ELK1;EEF2K;SYAP1;ADCY2;HEYL;RAB10;CAMK2A;UFM1;AKT2;PIAS2;ACACA;ABHD2;PIK3R1;PRKAR2A;SSTR2;EFNA5	cellular response to lipid	12	0.000651344	STAR;NR3C1;CRY2;GNAI1;RHOA;NCOR2;INSIG1;NTRK3;COL1A1;ZFP36L2;PRKAA1;IREB2	cofactor biosynthetic process	19	2.63023e-05	PDK1;FXN;PANK2;LIAS;ARNT;IBA57;PDP2;DHTKD1;PANK3;ACSL6;SLC25A16;ELOVL5;GGT5;GPI;PFKFB3;ENTPD5;PGM2L1;SCD;PFKFB2	synaptic vesicle recycling	3	0.0444092	OPHN1;SYT7;FCHO2
negative regulation of cellular macromolecule biosynthetic process	36	9.27263e-07	HMGB1;CAV1;HOXC8;ATXN1L;FOXN3;RFX3;MYOCD;CELF4;REST;FXR1;RPS6KA5;LEF1;SMAD4;MDM4;POU2F1;ZBTB20;CBX2;TNRC6B;ZHX3;BASP1;SATB2;SMAD2;SYNCRIP;MNT;BTG2;HEYL;HES2;CBX5;LARP1;NFIC;ZNF417;CNOT6L;TNRC6A;CBX6;GSK3B;LCOR	negative regulation of cell cycle	6	0.00240891	MEN1;ILK;TAOK1;TGFBR1;GEN1;JMY	ATPase binding	8	0.0208258	CAV1;ESR1;SYVN1;PGR;BBC3;PEX26;ANK1;TOR1AIP1	GDP binding	4	0.000751999	ARL3;ARF1;GNAI1;RHOA	coenzyme biosynthetic process	16	4.45015e-05	PDK1;PANK2;LIAS;ARNT;PDP2;DHTKD1;PANK3;ACSL6;SLC25A16;ELOVL5;GPI;PFKFB3;ENTPD5;PGM2L1;SCD;PFKFB2	regulation of transcription initiation from RNA polymerase II promoter	2	0.0445928	HMGB1;ESR1
negative regulation of cellular biosynthetic process	38	1.14755e-06	HMGB1;CAV1;HOXC8;ATXN1L;FOXN3;RFX3;MYOCD;CELF4;REST;FXR1;ERRFI1;RPS6KA5;LEF1;SMAD4;MDM4;POU2F1;ZBTB20;CBX2;TNRC6B;TOB2;ZHX3;BASP1;SATB2;SMAD2;SYNCRIP;MNT;BTG2;HEYL;HES2;CBX5;LARP1;NFIC;ZNF417;CNOT6L;TNRC6A;CBX6;GSK3B;LCOR	regulation of transforming growth factor beta receptor signaling pathway	3	0.00246793	MEN1;CD109;TGFBR1	regulation of Wnt signaling pathway	21	0.0214131	TSKU;CSNK2A1;TMEM237;CAV1;ESR1;DKK3;MAPK14;KREMEN1;LEF1;IGFBP4;WNT3;FGF9;XIAP;DVL1;STK4;SENP2;ITGA3;NXN;STK11;SOX7;SEMA5A	regulation of catabolic process	15	0.000779075	TNPO1;TNRC6B;PIK3R2;VPS13D;TNRC6C;MCL1;ULK1;TRIM65;TRIM67;ATG13;PIKFYVE;ZFP36L2;DDB1;EPHA4;PRKAA1	DNA-binding transcription factor activity	64	4.86143e-05	MYB;ZNF705A;ELK4;CREBRF;IKZF3;HOXB5;ZNF652;HES2;SOX7;KDM5A;NFATC2;CTCFL;ARNT;ZNF546;POU2F2;GATAD1;ZBED1;ZNF841;ZNF320;ZNF347;ZNF417;ZNF135;GMEB1;HEYL;MLXIP;REL;ZNF655;ZKSCAN1;ZNF101;ZNF430;ZNF708;ZFP14;ZFP82;ZNF566;ZNF829;ZNF554;ZNF426;ZNF561;POU2F1;TERF1;BCL6;EZH1;ETS1;ONECUT1;ARID5B;EN2;HOXC13;AFF2;BTG2;GATA2;CREBZF;KLF13;ZNF570;ZNF394;ZMYM1;ZNF490;ZNF500;HOXC8;HMBOX1;NFIB;KLF6;ZBTB25;NR2C2;MLL…	AMPA glutamate receptor complex	2	0.0445928	CACNG8;SHISA9
negative regulation of biosynthetic process	38	1.68799e-06	HMGB1;CAV1;HOXC8;ATXN1L;FOXN3;RFX3;MYOCD;CELF4;REST;FXR1;ERRFI1;RPS6KA5;LEF1;SMAD4;MDM4;POU2F1;ZBTB20;CBX2;TNRC6B;TOB2;ZHX3;BASP1;SATB2;SMAD2;SYNCRIP;MNT;BTG2;HEYL;HES2;CBX5;LARP1;NFIC;ZNF417;CNOT6L;TNRC6A;CBX6;GSK3B;LCOR	cellular response to transforming growth factor beta stimulus	4	0.00250524	USP15;MEN1;CD109;TGFBR1	cGMP-PKG signaling pathway	13	0.0229057	ATP2B1;CREB1;PPP1R12A;NPR1;ADCY6;SRF;MAPK1;CALML3;ADCY2;CREB3L2;AKT2;MYLK3;PPIF	tetrapyrrole biosynthetic process	3	0.000856259	MMAB;COX10;IREB2	Axon guidance	14	5.22441e-05	PDK1;DCC;BMPR2;NFATC2;BMP7;SEMA3E;SEMA5A;SRGAP1;EFNB2;LIMK1;GSK3B;TRPC3;GNAI2;MAPK1	postsynaptic density	8	0.0459111	GRID1;CACNG8;SHISA9;PALM;PLCB4;ADAM22;MINK1;EPHA4
negative regulation of RNA metabolic process	33	6.44826e-06	HMGB1;CAV1;HOXC8;ATXN1L;FOXN3;RFX3;MYOCD;CELF4;REST;RPS6KA5;LEF1;SMAD4;MDM4;POU2F1;ZBTB20;CBX2;TOB2;ZHX3;BASP1;MAPKAPK2;SATB2;SMAD2;SYNCRIP;MNT;BTG2;HEYL;HES2;CBX5;LARP1;NFIC;ZNF417;CBX6;LCOR	histone lysine methylation	3	0.00253277	MYB;SUV39H1;MEN1	inactivation of MAPK activity	4	0.0234376	CAV1;DUSP9;SPRED1;DUSP14	response to corticosteroid	6	0.000898482	STAR;NR3C1;RHOA;NTRK3;COL1A1;ZFP36L2	endocytosis	32	8.74352e-05	HMGB1;NLGN4X;PIKFYVE;SYNRG;RAB27A;MESD;EEF2K;CRK;LRP10;HEATR5A;GRK3;APOL1;F2RL1;WIPF3;AP1S1;LDLR;WIPF2;EFNB2;CACNG7;LIMK1;GPR107;RALBP1;CBL;CDC42SE1;GATA2;NLGN2;TYRO3;RAB5B;MAPK1;EPS15L1;MYO6;ASGR2	asymmetric synapse	8	0.0487696	GRID1;CACNG8;SHISA9;PALM;PLCB4;ADAM22;MINK1;EPHA4
Pathways in cancer	19	6.96963e-06	MET;BCL2;CDK6;IL6R;LAMC1;RPS6KA5;CCNE2;LEF1;SMAD4;GNG3;SMAD2;ITGA3;ELK1;CALML3;HEYL;PIK3R2;CCDC6;IL2RA;GSK3B	transferase complex	7	0.00256377	ACTB;ORMDL3;UBE2N;DDA1;MEN1;BRPF1;TGFBR1	modulation of excitatory postsynaptic potential	5	0.0243972	CELF4;NLGN2;DVL1;S1PR2;STX1B	GPI-linked ephrin receptor activity	2	0.00091871	NTRK3;EPHA4	protein kinase activity	31	9.83915e-05	PDK1;MAP3K2;RPS6KA3;CDK9;BMPR2;TRPM7;SIK2;SMG1;EEF2K;MYLK3;GRK3;TESK2;IRAK4;DSTYK;FGFR1;PDIK1L;EFNB2;BTK;LIMK1;GSK3B;SBK1;TGFBR1;CAB39;MAP3K9;STK4;TYRO3;ACVR1B;WNK3;MAPK1;UHMK1;PIM3	postsynaptic membrane	8	0.0495019	GRID1;CACNG8;SHISA9;ADAM22;MINK1;NTRK3;KCNB1;EPHA4
regulation of protein localization	27	8.05256e-06	IRS1;HMGB1;PPIA;HNF4A;PPP1R11;BCL2;RFX3;REST;CCNE2;SYT7;IQSEC2;RAB11B;ITGA3;GDI1;PIK3R2;STK11;RABGAP1L;SYK;MIEF1;EFNA5;PTPN14;STX6;TP53INP2;SRCIN1;TCAF1;XPO4;GSK3B	regulation of cellular response to transforming growth factor beta stimulus	3	0.00259865	MEN1;CD109;TGFBR1	RNA polymerase II sequence-specific DNA-binding transcription factor binding	2	0.0244196	MYOCD;SRF	cellular response to nutrient levels	7	0.000931076	FNIP1;ULK1;CASTOR2;KCNB1;COL1A1;PRKAA1;IREB2	head development	33	0.000326775	NLGN4X;HOOK3;BMPR2;BMP7;CRK;GNB4;GRIN2B;SEMA5A;FGFR1;KDM2B;ZNF430;SPATA5;BCL2L11;SLC38A2;CTNND1;EZH1;ETS1;GSK3B;ARID5B;EN2;ATXN1L;AFF2;PFKFB3;HMGCS1;BTG2;GATA2;TYRO3;ATXN1;SOCS7;RAN;NFIB;MAPK1;SGPL1	negative regulation of cellular biosynthetic process	39	8.55363e-06	E2F6;TCERG1;HMGB1;ZNF417;SAMD4A;CAV1;FOXK2;HMBOX1;POU2F1;ELK4;REST;ESR1;AGO3;SUV39H1;AR;AGO2;ETV3;MTDH;GNL3L;DNMT3B;SNAI2;NFIX;SKI;LIMS1;REL;SKIL;HES2;INSIG1;HMGA2;BACH2;RREB1;CBX5;PPM1F;ZFP36L2;PRKAA1;CNOT6L;TOB2;SOX2;ZNF12
positive regulation of cellular catabolic process	15	8.59564e-06	IRS1;HMGB1;CAV1;SPTLC2;ZBTB20;TNRC6B;BTG2;STK11;PHKG2;LARP1;CNOT6L;TNRC6A;TP53INP2;PIP4K2B;GSK3B	response to transforming growth factor beta	4	0.00278995	USP15;MEN1;CD109;TGFBR1	cellular response to antibiotic	11	0.0274588	CYBB;GPR37L1;CDKN1B;PAX2;MDM2;ADCY6;ADCY2;TP53;LARP1;EFNA5;PPIF	response to alcohol	7	0.000954908	STAR;SETD7;GNAI1;RHOA;NTRK3;PRKAA1;IREB2	regulation of carbohydrate metabolic process	12	0.000341403	IRS1;PDK1;HMGB1;ARNT;MLXIP;SLC35B4;GSK3B;PPP1R3B;PFKFB3;ENTPD5;PMAIP1;PFKFB2	negative regulation of biosynthetic process	39	1.23686e-05	E2F6;TCERG1;HMGB1;ZNF417;SAMD4A;CAV1;FOXK2;HMBOX1;POU2F1;ELK4;REST;ESR1;AGO3;SUV39H1;AR;AGO2;ETV3;MTDH;GNL3L;DNMT3B;SNAI2;NFIX;SKI;LIMS1;REL;SKIL;HES2;INSIG1;HMGA2;BACH2;RREB1;CBX5;PPM1F;ZFP36L2;PRKAA1;CNOT6L;TOB2;SOX2;ZNF12
positive regulation of catabolic process	16	1.43961e-05	MYLIP;IRS1;HMGB1;CAV1;SPTLC2;ZBTB20;TNRC6B;BTG2;STK11;PHKG2;LARP1;CNOT6L;TNRC6A;TP53INP2;PIP4K2B;GSK3B	histone H3-K9 methylation	2	0.0028259	MYB;SUV39H1	MAPK cascade	50	0.0327738	EPHB1;PABPN1;MAP3K9;CCR5;IL5;HACD3;HMGB1;CAV1;DSTYK;MAPK14;PAK3;GPR37L1;VEGFA;ERRFI1;GRB2;NDST1;SMAD4;KLHDC10;DDR1;IGFBP4;NRG4;DUSP9;GNG3;SH3RF1;CCL11;GRIN2B;RASGRF1;FGF9;MAPKAPK2;CAMK2G;DHX33;SPRED1;RAP1A;WWC1;DIRAS2;PTPN2;CCL22;MAPK1;IL2RA;UBE2N;MAP4K2;CAMK2A;MAPK8IP3;S1PR2;SYK;TGFBR1;GPR55;SAMD5;TAOK1;DUSP14	regulation of intracellular protein transport	7	0.000954908	PIK3R2;PTPN14;ATG13;INSIG1;KCNB1;SEC16A;PRKAA1	import into cell	34	0.000342847	HMGB1;NLGN4X;PIKFYVE;SYNRG;RAB27A;MESD;EEF2K;SLC1A5;CRK;LRP10;HEATR5A;GRK3;APOL1;F2RL1;WIPF3;AP1S1;LDLR;WIPF2;EFNB2;CACNG7;LIMK1;GPR107;RALBP1;CBL;CDC42SE1;SLC7A1;GATA2;NLGN2;TYRO3;RAB5B;MAPK1;EPS15L1;MYO6;ASGR2	negative regulation of cellular macromolecule biosynthetic process	36	1.50257e-05	E2F6;TCERG1;HMGB1;ZNF417;SAMD4A;CAV1;FOXK2;HMBOX1;POU2F1;ELK4;REST;ESR1;AGO3;SUV39H1;AR;AGO2;ETV3;MTDH;GNL3L;DNMT3B;SNAI2;NFIX;SKI;LIMS1;REL;SKIL;HES2;HMGA2;BACH2;RREB1;CBX5;PPM1F;ZFP36L2;CNOT6L;SOX2;ZNF12
exocytic vesicle membrane	8	1.82903e-05	SYT7;SLC6A17;RPH3A;RAB11B;RAB5B;PTPRN2;PRRT2;STX6	negative regulation of epithelial cell proliferation	3	0.00316407	MEN1;CD109;TGFBR1	positive regulation of inhibitory postsynaptic potential	2	0.0332295	NLGN2;NTSR1	receptor tyrosine kinase binding	4	0.000955697	PIK3R2;PTPN14;DAZAP2;FRS2	cofactor metabolic process	26	0.000373435	PDK1;L2HGDH;FXN;PANK2;LIAS;H6PD;CIAO1;GSTM3;ARNT;IBA57;PDP2;THEM4;DHTKD1;PANK3;ACSL6;SLC25A16;ELOVL5;GGT5;GPI;PFKFB3;HMGCS1;ENTPD5;PGM2L1;SCD;PFKFB2;CYB5R3	negative regulation of macromolecule biosynthetic process	37	2.00597e-05	E2F6;TCERG1;HMGB1;ZNF417;SAMD4A;CAV1;FOXK2;HMBOX1;POU2F1;ELK4;REST;ESR1;AGO3;SUV39H1;AR;AGO2;ETV3;MTDH;GNL3L;DNMT3B;SNAI2;NFIX;SKI;LIMS1;REL;SKIL;HES2;HMGA2;BACH2;RREB1;CBX5;PPM1F;ZFP36L2;CNOT6L;TOB2;SOX2;ZNF12
nuclear-transcribed mRNA poly(A) tail shortening	5	2.17428e-05	CNOT4;TNRC6B;BTG2;CNOT6L;TNRC6A	positive regulation of organelle organization	6	0.00342118	MYB;UBE2N;UBL5;TGFBR1;PPM1F;JMY	modulation of inhibitory postsynaptic potential	2	0.0332295	NLGN2;NTSR1	cytoskeleton-dependent intracellular transport	6	0.00101642	TNPO1;TRIM58;ARL3;TUBB;HOOK3;TRAF3IP1	positive regulation of toll-like receptor 2 signaling pathway	3	0.000388831	HMGB1;TIRAP;F2RL1	cellular response to stress	43	5.99738e-05	CAB39;SLC38A2;HMGB1;SOD2;CAV1;CDKN1A;INO80D;IRAK4;YOD1;TAOK1;STK4;POLD3;WNT9B;SUV39H1;TMEM189-UBE2V1;MINK1;GRINA;SUSD6;MAPK13;FXN;DNMT3B;ETS1;SPRTN;SNAI2;GTF2H1;SESN3;BID;FER;SKIL;INSIG1;NTRK3;RNF111;HMGA2;GLUL;CBX5;JMY;DDB1;EPHA4;CASP2;SEC16A;PRKAA1;CNOT6L;IGF1R
dentate gyrus development	4	2.43335e-05	CDK6;LEF1;BTG2;EMX2	regulation of cellular response to growth factor stimulus	4	0.00362263	MEN1;ILK;CD109;TGFBR1	Pathways in cancer	49	2.74862e-07	CCND2;IL5;CDKN1A;ESR1;F2RL3;IL6R;VEGFA;PML;GRB2;SUFU;CDK6;CDKN1B;LAMC1;RPS6KA5;CCNE2;LEF1;SMAD4;RARA;WNT3;TPM3;GNG3;PLCG1;FGF9;BBC3;MDM2;XIAP;ADCY6;CAMK2G;DVL1;ITGA2;STK4;WNT9B;ITGA3;ELK1;GNB4;MAPK1;CALML3;IL2RA;ADCY2;HEYL;CAMK2A;AKT2;TP53;TGFBR1;E2F2;ZBTB16;PIK3R1;IL23R;BAK1	regulation of autophagy	8	0.00104057	PIK3R2;VPS13D;MCL1;ULK1;TRIM65;ATG13;PIKFYVE;PRKAA1	regulation of neuron death	17	0.000429375	DCC;MYB;XRCC2;GRIN2B;KDM2B;REL;BCL2L11;EFNB2;GPI;GSK3B;EN2;CBL;IKBKG;BTG2;BHLHB9;RILPL1;TYRO3	double-stranded DNA binding	26	8.41819e-05	E2F6;HMGB1;AFF1;FOXK2;HMBOX1;ZBED1;POU2F1;ELK4;REST;ESR1;NR2C2;SUV39H1;AR;PKNOX2;ETV3;ETS1;SNAI2;LMNB1;REL;SKIL;HES2;HMGA2;BACH2;RREB1;MTF1;SOX2
axon	19	3.84543e-05	OPHN1;PALM;GRM7;FXR1;SYT7;NPTXR;MYH14;BASP1;PTPRN2;ITGA3;ELK1;PRRT2;GDI1;NFASC;CABP4;SRCIN1;CBX6;ANK1;GSK3B	peptidyl-lysine methylation	3	0.00363405	MYB;SUV39H1;MEN1	cardiovascular system development	58	7.42805e-07	EPHB1;SHB;CDH5;HMGB1;SOD2;CAV1;LGALS8;FBXW8;MAPK14;CCBE1;CYBB;THBS2;MYOCD;VEGFA;ERRFI1;PML;SUFU;NDST1;LEF1;VAV3;AGO2;CCL11;PROX1;PLCG1;CRB2;RORA;S1PR1;FGF9;MDM2;NPR1;PARVA;UNC5B;SRF;SPRED1;RAP1A;STK4;MCAM;NXN;EFNA3;PKNOX1;MAPK1;HEYL;FOSL1;STK11;TBXA2R;BCAS3;SYK;TGFBR1;E2F2;HPSE;BMPR2;HIF1AN;ADM2;SEMA5A;VASH1;BAK1;ANTXR1;PLXND1	lens fiber cell differentiation	3	0.00105085	SKIL;NTRK3;FRS2	phosphatase activity	16	0.000584513	PIKFYVE;G6PC;PTPN14;PDP2;PSPH;APTX;CYCS;PPM1K;PPP1R3B;PFKFB3;MTMR3;CDC14B;PPM1L;PTP4A1;MTMR9;PFKFB2	negative regulation of gene expression	40	0.000109695	E2F6;TCERG1;HMGB1;ZNF417;SAMD4A;CAV1;FOXK2;HMBOX1;POU2F1;ELK4;REST;ESR1;AGO3;SUV39H1;AR;CD3E;DDX6;AGO2;ETV3;SERBP1;MTDH;DNMT3B;SNAI2;NFIX;SKI;LIMS1;REL;SKIL;HES2;HMGA2;BACH2;RREB1;CBX5;RBM8A;PPM1F;ZFP36L2;PRKAA1;CNOT6L;SOX2;ZNF12
negative regulation of nucleobase-containing compound metabolic process	33	4.08306e-05	HMGB1;CAV1;HOXC8;ATXN1L;FOXN3;RFX3;MYOCD;CELF4;REST;RPS6KA5;LEF1;SMAD4;MDM4;POU2F1;ZBTB20;CBX2;TOB2;ZHX3;BASP1;MAPKAPK2;SATB2;SMAD2;SYNCRIP;MNT;BTG2;HEYL;HES2;CBX5;LARP1;NFIC;ZNF417;CBX6;LCOR	fibroblast migration	2	0.0037648	ILK;ARID5B	Glioma	14	1.51768e-06	CDKN1A;GRB2;CDK6;PLCG1;MDM2;CAMK2G;MAPK1;CALML3;CAMK2A;AKT2;TP53;E2F2;PIK3R1;BAK1	negative regulation of cell communication	19	0.00111456	FNIP1;CRY2;MTRNR2L1;PIK3R2;MCL1;ARF1;RHOA;NCOR2;TRIM67;CASTOR2;SKIL;INSIG1;NTRK3;KCNB1;LRPAP1;EPHA4;PRKAA1;TRAF3IP1;SIAH2	glycogen catabolic process	4	0.00064117	HMGB1;G6PC;PPP1R3B;PGM2L1	protein complex oligomerization	18	0.000115051	CAB39;ACACA;KCTD15;P2RX3;C1QTNF6;SOD2;CAV1;AR;CD3E;CPSF7;SKI;LIMS1;BID;GLUL;KCNB1;COL1A1;PRKAA1;IGF1R
negative regulation of cell proliferation	20	5.75968e-05	SOD2;CAV1;HNF4A;BCL2;CDK6;MYOCD;REST;SMAD4;MDM4;TOB2;SMAD2;MNT;LDOC1;BTG2;STK11;VASH1;PTPN14;SDC4;SPN;IL2RA	ubiquitin conjugating enzyme activity	2	0.0037648	UBE2Z;UBE2N	circulatory system development	76	1.92778e-06	EPHB1;SHB;CDH5;MYBPC1;HMGB1;SOD2;CAV1;MICAL2;CDKN1A;GJA1;LGALS8;FBXW8;MAPK14;CCBE1;CYBB;THBS2;CREB1;MYOCD;VEGFA;ERRFI1;PML;SUFU;REST;NDST1;NSD2;CDKN1B;LEF1;SMAD4;VAV3;RARA;AGO2;CALR;CCL11;PROX1;PLCG1;CRB2;RORA;S1PR1;FGF9;MDM2;NPR1;BASP1;PARVA;UNC5B;SRF;SPRED1;RAP1A;STK4;SENP2;ITGA3;ECE1;MCAM;NXN;TFDP2;EFNA3;PKNOX1;MAPK1;HEYL;FOSL1;STK11;TBXA2R;BCAS3;MTHFD1;SYK;TGFBR1;E2F2;HPSE;BMPR2;MYLK3;HIF1AN;…	negative regulation of signaling	19	0.00115537	FNIP1;CRY2;MTRNR2L1;PIK3R2;MCL1;ARF1;RHOA;NCOR2;TRIM67;CASTOR2;SKIL;INSIG1;NTRK3;KCNB1;LRPAP1;EPHA4;PRKAA1;TRAF3IP1;SIAH2	glucose metabolic process	13	0.000662603	IRS1;PDK1;HMGB1;G6PC;H6PD;SLC35B4;GPI;GSK3B;ONECUT1;PPP1R3B;PGM2L1;PMAIP1;PFKFB2	response to hyperoxia	4	0.000121043	CAV1;CDKN1A;DNMT3B;COL1A1
type B pancreatic cell development	4	6.25564e-05	HNF4A;CDK6;RFX3;GSK3B	endocrine system development	3	0.00388419	MEN1;TGFBR1;ARID5B	vasculature development	56	2.28708e-06	EPHB1;SHB;CDH5;HMGB1;SOD2;CAV1;LGALS8;FBXW8;MAPK14;CCBE1;CYBB;THBS2;MYOCD;VEGFA;ERRFI1;PML;SUFU;NDST1;LEF1;VAV3;AGO2;CCL11;PROX1;PLCG1;RORA;S1PR1;FGF9;MDM2;NPR1;PARVA;UNC5B;SRF;SPRED1;RAP1A;STK4;MCAM;EFNA3;PKNOX1;MAPK1;HEYL;FOSL1;STK11;TBXA2R;BCAS3;SYK;TGFBR1;E2F2;HPSE;BMPR2;HIF1AN;ADM2;SEMA5A;VASH1;BAK1;ANTXR1;PLXND1	megakaryocyte differentiation	4	0.00119541	TNRC6B;TNRC6C;TAL1;AGO1	Fostamatinib	17	0.000701959	MAP3K2;RPS6KA3;BMPR2;SIK2;MYLK3;IRAK4;ABCB5;FGFR1;BTK;LIMK1;GSK3B;SBK1;TGFBR1;MAP3K9;TYRO3;ACVR1B;PIM3	negative regulation of nucleic acid-templated transcription	31	0.000124767	E2F6;TCERG1;HMGB1;ZNF417;CAV1;FOXK2;HMBOX1;POU2F1;ELK4;REST;ESR1;SUV39H1;AR;ETV3;MTDH;DNMT3B;SNAI2;NFIX;SKI;LIMS1;REL;SKIL;HES2;HMGA2;BACH2;RREB1;CBX5;PPM1F;TOB2;SOX2;ZNF12
negative regulation of nucleic acid-templated transcription	29	8.13354e-05	HMGB1;CAV1;HOXC8;ATXN1L;FOXN3;RFX3;MYOCD;REST;RPS6KA5;LEF1;SMAD4;MDM4;POU2F1;ZBTB20;CBX2;TOB2;ZHX3;BASP1;SATB2;SMAD2;MNT;BTG2;HEYL;HES2;CBX5;NFIC;ZNF417;CBX6;LCOR	positive regulation of macromolecule biosynthetic process	11	0.00413013	MYB;UBTF;CITED4;MEN1;BRPF1;ILK;TGFBR1;SMARCD1;JMY;RBMS3;ARID5B	tube development	73	3.93031e-06	EPHB1;SHB;CDH5;HMGB1;CAV1;MICAL2;CDKN1A;ESR1;MAPK14;CCBE1;CYBB;THBS2;CREB1;PTK6;MYOCD;VEGFA;PGR;ERRFI1;PML;SUFU;LEF1;SMAD4;VAV3;SDC4;DDR1;RARA;PAX2;AGO2;FKBP8;CFL1;NTN1;CCL11;PROX1;PLCG1;RORA;S1PR1;FGF9;NPR1;BASP1;PARVA;UNC5B;SRF;DVL1;SPRED1;RAP1A;STK4;FMN1;WNT9B;ITGA3;MTHFR;MCAM;EFNA3;PKNOX1;MAPK1;HEYL;TBXA2R;BCAS3;MTHFD1;FSTL3;SYK;TGFBR1;E2F2;HPSE;BMPR2;HIF1AN;ADM2;SEMA5A;VASH1;KDM2B;BAK1;FOXE1…	Atg1/ULK1 kinase complex	2	0.00121956	ULK1;ATG13	protein autophosphorylation	14	0.000709853	TRPM7;SIK2;SMG1;EEF2K;FGFR1;BTK;GSK3B;MAP3K9;STK4;TYRO3;ACVR1B;WNK3;UHMK1;PIM3	negative regulation of transcription, DNA-templated	30	0.000141966	E2F6;TCERG1;HMGB1;ZNF417;CAV1;FOXK2;HMBOX1;POU2F1;ELK4;REST;ESR1;SUV39H1;AR;ETV3;MTDH;DNMT3B;SNAI2;NFIX;SKI;LIMS1;REL;SKIL;HES2;HMGA2;BACH2;RREB1;CBX5;PPM1F;SOX2;ZNF12
negative regulation of translation	8	8.34604e-05	CELF4;FXR1;TNRC6B;SYNCRIP;BTG2;LARP1;CNOT6L;TNRC6A	activation of JUN kinase activity	2	0.00417564	TAOK1;MAP3K9	protein serine/threonine kinase activity	41	4.2732e-06	CSNK2A1;MAP3K9;ULK2;CDKN1A;DSTYK;MAPK14;UHMK1;PAK3;PDK3;DYRK2;CDK6;OXSR1;CDKN1B;RPS6KA5;CCNE2;RPS6KA3;NEK4;MAPKAPK2;KSR2;PRKAB1;CAMK2G;STK4;PRPF4B;STK35;EEF2K;MAPK1;RPS6KA4;MAP4K2;CAMK2A;STK11;ACVR2A;AKT2;SYK;TGFBR1;PHKG2;CCNT1;BMPR2;MYLK3;TAOK1;WNK3;CAB39	response to steroid hormone	9	0.00123529	STAR;NR3C1;CRY2;RHOA;TXNIP;NCOR2;NTRK3;COL1A1;ZFP36L2	positive regulation of gene expression	65	0.000732712	MYB;MAP3K2;HMGB1;RPS6KA3;ELK4;CREBRF;MAVS;CDK9;SF3B1;BMPR2;RBM4B;PIAS2;IKZF3;HOXB5;SOX7;RAB27A;TIRAP;KDM5A;NFATC2;BMP7;CTCFL;LIMS1;ARNT;POU2F2;ADM2;ZBED1;ATF7IP;F2RL1;GMEB1;HEYL;MLXIP;REL;VHL;LDLR;POU2F1;EZH1;ETS1;GSK3B;PTGES2;ONECUT1;ATXN7L3;EN2;HOXC13;IKBKG;SLC26A9;MICAL2;TRMT10C;GATA2;TGFBR1;KLF13;SMARCD1;ACVR1B;HMBOX1;RAN;TNRC6B;NFIB;MAPK1;KLF6;TIMM17A;RMND1;NPNT;NR2C2;MYO6;UHMK1;SETD7	cellular response to nutrient levels	11	0.000158439	SLC38A2;P2RX3;CDKN1A;WNT9B;CASTOR2;SNAI2;SESN3;GLUL;KCNB1;COL1A1;PRKAA1
negative regulation of RNA biosynthetic process	29	8.37157e-05	HMGB1;CAV1;HOXC8;ATXN1L;FOXN3;RFX3;MYOCD;REST;RPS6KA5;LEF1;SMAD4;MDM4;POU2F1;ZBTB20;CBX2;TOB2;ZHX3;BASP1;SATB2;SMAD2;MNT;BTG2;HEYL;HES2;CBX5;NFIC;ZNF417;CBX6;LCOR	ubiquitin-like protein conjugating enzyme activity	2	0.00417564	UBE2Z;UBE2N	DNA-binding transcription factor activity	110	6.3146e-06	NONO;ZNF785;KCNIP3;EMX2;SPIB;GATAD2A;ZNF430;CREBRF;PHF19;ZNF786;ZNF417;ESR1;GABPB1;ZBTB39;BNC2;MACC1;CARHSP1;ZNF562;CREB1;ZNF619;SMARCC1;RFX3;MYOCD;KDM5C;E2F5;PGR;HIC2;REST;NSD2;LEF1;SMAD4;ZNF614;SSBP2;MYCN;ZNF264;PLAGL2;KLF13;RARA;PAX2;ZNF70;BTG2;NRF1;PROX1;ZNF518B;RORA;MAZ;BHLHE40;ZNF426;SRF;HES2;ZNF268;MNT;HOXC8;NFX1;PCGF3;ZC3H15;KAT7;TARDBP;ELK1;TSHZ2;TFDP2;MAFF;ZNF841;ZNF347;ZNF154;PKNOX1;ZN…	Cul4-RING E3 ubiquitin ligase complex	3	0.00139162	TRPC4AP;DCAF16;DDB1	positive regulation of biosynthetic process	66	0.000746042	IRS1;MYB;MAP3K2;HMGB1;RPS6KA3;ELK4;CREBRF;MAVS;CDK9;BMPR2;PIAS2;IKZF3;HOXB5;SOX7;RAB27A;TIRAP;KDM5A;NFATC2;BMP7;CTCFL;ARNT;POU2F2;DBF4;ZBED1;ATF7IP;F2RL1;FGFR1;GMEB1;HEYL;MLXIP;REL;VHL;PLIN5;LDLR;POU2F1;ELOVL5;EZH1;ETS1;PTGES2;ONECUT1;ARID5B;ATXN7L3;EN2;HOXC13;IKBKG;PFKFB3;MICAL2;TRMT10C;GATA2;TGFBR1;KLF13;SMARCD1;ENTPD5;ACVR1B;HMBOX1;RAN;NFIB;MAPK1;KLF6;PFKFB2;RMND1;NPNT;NR2C2;MYO6;UHMK1;SETD7	sequence-specific double-stranded DNA binding	23	0.000278856	E2F6;FOXK2;ZBED1;POU2F1;ELK4;REST;ESR1;NR2C2;SUV39H1;AR;PKNOX2;ETV3;ETS1;SNAI2;LMNB1;REL;SKIL;HES2;HMGA2;BACH2;RREB1;MTF1;SOX2
negative regulation of transcription, DNA-templated	28	9.99446e-05	HMGB1;CAV1;HOXC8;ATXN1L;FOXN3;RFX3;MYOCD;REST;RPS6KA5;LEF1;SMAD4;MDM4;POU2F1;ZBTB20;CBX2;ZHX3;BASP1;SATB2;SMAD2;MNT;BTG2;HEYL;HES2;CBX5;NFIC;ZNF417;CBX6;LCOR	actin cytoskeleton organization	6	0.00421036	ACTB;ILK;TAOK1;TGFBR1;PPM1F;JMY	transferase complex	59	8.96681e-06	POLD3;DCAF7;CCND2;PHF19;RNF144B;CDKN1A;SPTLC3;CBX5;FBXW8;SYVN1;KLHL21;ERC1;FBXO9;DCAF8;PRPS1;KDM5C;DYRK2;CDK6;REST;CDKN1B;CCNE2;ATXN7L3;CBX2;MAT2A;RPRD2;UBE2S;SESN2;DDA1;DCUN1D5;PIK3C2B;PRKAB1;PCGF3;POLD4;KAT7;MAGT1;FBXO27;ZYG11B;MEAF6;UBE2N;MKLN1;GTF2F1;ACVR2A;SNRPD3;PEX2;TP53;TGFBR1;PRPSAP1;PHKG2;CCNT1;PIK3R1;PRKAR2A;METTL14;POLR2E;DHTKD1;PRDM4;FBXL19;GTF2H5;CAB39;RNF11	Imidazole	2	0.00156112	AK2;CYCS	nucleoside bisphosphate biosynthetic process	7	0.000761139	PDK1;PANK2;PDP2;PANK3;ACSL6;ELOVL5;SCD	myelination in peripheral nervous system	4	0.000287869	ADAM22;NCMAP;SKI;NTRK3
RNA catabolic process	13	0.000120323	CNOT4;FXR1;TNRC6B;MAPKAPK2;SYNCRIP;DDX6;BTG2;LARP1;CNOT6L;TNRC6A;SMG1;DIS3L;RBM8A	nuclear periphery	3	0.00432399	MYB;SUV39H1;MEN1	SNARE interactions in vesicular transport	9	9.1301e-06	VAMP2;VAMP1;GOSR2;STX2;STX1B;STX16;BET1L;STX6;VAMP8	negative regulation of translation	5	0.00160966	TNRC6B;TNRC6C;AGO1;ZFP36L2;IREB2	ribonucleoside bisphosphate biosynthetic process	7	0.000761139	PDK1;PANK2;PDP2;PANK3;ACSL6;ELOVL5;SCD	peripheral nervous system axon ensheathment	4	0.000287869	ADAM22;NCMAP;SKI;NTRK3
endocrine pancreas development	5	0.000137798	HNF4A;CDK6;IL6R;RFX3;GSK3B	histone methylation	3	0.00441543	MYB;SUV39H1;MEN1	tube morphogenesis	61	1.08352e-05	EPHB1;SHB;CDH5;HMGB1;CAV1;MICAL2;ESR1;MAPK14;CCBE1;CYBB;THBS2;MYOCD;VEGFA;PGR;PML;SUFU;LEF1;SMAD4;VAV3;SDC4;DDR1;RARA;PAX2;AGO2;CFL1;NTN1;CCL11;PROX1;PLCG1;RORA;S1PR1;FGF9;NPR1;PARVA;UNC5B;SRF;DVL1;SPRED1;RAP1A;STK4;FMN1;WNT9B;MTHFR;MCAM;EFNA3;PKNOX1;TBXA2R;BCAS3;MTHFD1;SYK;TGFBR1;E2F2;HPSE;BMPR2;HIF1AN;ADM2;SEMA5A;VASH1;KDM2B;BAK1;PLXND1	response to ethanol	5	0.00172533	STAR;SETD7;RHOA;NTRK3;PRKAA1	purine nucleoside bisphosphate biosynthetic process	7	0.000761139	PDK1;PANK2;PDP2;PANK3;ACSL6;ELOVL5;SCD	RISC complex	3	0.000296483	AGO3;DDX6;AGO2
nuclear-transcribed mRNA catabolic process, deadenylation-dependent decay	6	0.000149118	CNOT4;TNRC6B;DDX6;BTG2;CNOT6L;TNRC6A	protein deubiquitination	4	0.0044927	USP15;ACTB;TGFBR1;STAM	blood vessel development	52	1.29926e-05	EPHB1;SHB;CDH5;HMGB1;CAV1;FBXW8;MAPK14;CCBE1;CYBB;THBS2;MYOCD;VEGFA;PML;SUFU;NDST1;LEF1;VAV3;AGO2;CCL11;PROX1;PLCG1;RORA;S1PR1;FGF9;MDM2;NPR1;PARVA;UNC5B;SRF;SPRED1;RAP1A;STK4;MCAM;EFNA3;PKNOX1;MAPK1;HEYL;FOSL1;TBXA2R;BCAS3;SYK;TGFBR1;E2F2;HPSE;BMPR2;HIF1AN;ADM2;SEMA5A;VASH1;BAK1;ANTXR1;PLXND1	response to ketone	6	0.00174732	STAR;NR3C1;GNAI1;TXNIP;NTRK3;PRKAA1	cellular lipid metabolic process	41	0.000793111	IRS1;PDK1;ABHD15;PANK2;LIAS;PIKFYVE;CYP27C1;G6PC;FADS6;SMG1;GDE1;LONP2;DGKH;PDP2;THEM4;ATG14;FGFR1;PLA2G12A;LRAT;ACSL6;ALG1;PLIN5;LDLR;ELOVL5;PTGS1;GGT5;PTGES2;SDC2;ZADH2;HMGCS1;MTMR3;PPM1L;COL4A3BP;LAMTOR1;SOCS7;MTMR9;ACOX1;CDIPT;SCD;SGPL1;SAMD8	RNAi effector complex	3	0.000296483	AGO3;DDX6;AGO2
response to cholesterol	4	0.00015637	CCR5;SMAD2;GRAMD1B;HMGCS1	positive regulation of nucleobase-containing compound metabolic process	11	0.00450818	MYB;UBTF;CITED4;UBE2N;MEN1;BRPF1;ILK;TGFBR1;SMARCD1;JMY;ARID5B	transferase activity, transferring phosphorus-containing groups	71	1.42097e-05	EPHB1;POLD3;CCND2;CSNK2A1;ABL2;MAP3K9;IL5;ULK2;CDKN1A;ESR1;DSTYK;MAPK14;UHMK1;PAK3;PDK3;PRPS1;PTK6;GRB2;DYRK2;CDK6;AGK;OXSR1;NME4;CDKN1B;RPS6KA5;CCNE2;PDXK;RPS6KA3;PCYT1A;DDR1;NRG4;NEK4;FGF9;NPR1;PIK3C2B;MAPKAPK2;KSR2;PRKAB1;CAMK2G;STK4;PRPF4B;GNE;STK35;POLD4;EEF2K;TEP1;AK3;EFNA3;MAPK1;RPS6KA4;MAP4K2;CAMK2A;STK11;ACVR2A;AKT2;GK5;SYK;TGFBR1;PRPSAP1;PHKG2;CCNT1;PIK3R1;POLR2E;BMPR2;USP14;MYLK3;FAM20…	positive regulation of catabolic process	9	0.00177423	TNRC6B;VPS13D;TNRC6C;ULK1;TRIM65;TRIM67;ZFP36L2;DDB1;PRKAA1	glucan catabolic process	4	0.000797572	HMGB1;G6PC;PPP1R3B;PGM2L1	transcription regulatory region sequence-specific DNA binding	22	0.000340596	E2F6;FOXK2;ZBED1;POU2F1;ELK4;REST;ESR1;NR2C2;SUV39H1;AR;PKNOX2;ETV3;ETS1;SNAI2;REL;SKIL;HES2;HMGA2;BACH2;RREB1;MTF1;SOX2
glandular epithelial cell development	4	0.00015637	HNF4A;CDK6;RFX3;GSK3B	positive regulation of nucleic acid-templated transcription	10	0.0045861	MYB;UBTF;CITED4;MEN1;BRPF1;ILK;TGFBR1;SMARCD1;JMY;ARID5B	negative regulation of gene expression	110	1.51586e-05	NONO;DDX6;KCNIP3;RPL28;CD55;GATAD2A;PHF19;HMGB1;ZNF417;SAMD4A;CAV1;ESR1;GLG1;CBX5;DKK3;MAPK14;NACC1;CARHSP1;CREB1;RFX3;MYOCD;VEGFA;KDM5C;CELF4;E2F5;PGR;CASC3;IGF2BP1;PML;SUFU;HIC2;YWHAZ;REST;NSD2;FXR1;CDKN1B;RPS6KA5;LEF1;SMAD4;MDM4;MYCN;SRSF10;RARA;CBX2;PAX2;AGO2;BTG2;CNOT6L;SESN2;CALR;PROX1;FGF9;MDM2;XIAP;GTPBP1;BASP1;PKP1;MAPKAPK2;PDE12;BHLHE40;CAPRIN1;RPS24;SRF;HES2;ZNF268;MNT;UNK;WWC1;HOXC8;C…	negative regulation of intracellular steroid hormone receptor signaling pathway	3	0.00179466	CRY2;RHOA;NCOR2	RNA 5'-end processing	4	0.000797572	PNPT1;USP14;RPP25;TRMT10C	protein-containing complex assembly	40	0.00036157	CAB39;ACACA;KCTD15;MYBPC1;P2RX3;HMGB1;C1QTNF6;SOD2;CAV1;COX19;DNAL1;ESR1;AGO3;AR;CD3E;DDX6;SNU13;AGO2;ATPAF1;CPSF7;GTF2H1;SKI;LIMS1;BID;FER;COX10;INSIG1;GLUL;KCNB1;COL1A1;JMY;DDB1;SEC16A;PRKAA1;FCHO2;CNOT6L;TRAF3IP1;OCLN;RPF2;IGF1R
type B pancreatic cell differentiation	4	0.00015637	HNF4A;CDK6;RFX3;GSK3B	positive regulation of RNA biosynthetic process	10	0.00460673	MYB;UBTF;CITED4;MEN1;BRPF1;ILK;TGFBR1;SMARCD1;JMY;ARID5B	positive regulation of cell morphogenesis involved in differentiation	19	1.67616e-05	RAB21;FBXW8;PAK3;TRIOBP;VEGFA;WNT3;CALR;NTN1;CAPRIN1;SRF;EEF2K;LIMS1;GDI1;STK11;BMPR2;SEMA5A;EFNA5;PLXNA3;PLXND1	amide biosynthetic process	13	0.00192916	TNRC6B;ORMDL2;MRPS18B;TNRC6C;RHOA;AGO1;MRPS21;RBM8A;ZFP36L2;PRKAA1;QKI;SECISBP2L;IREB2	monocarboxylic acid metabolic process	26	0.000805055	IRS1;PDK1;PANK2;LIAS;CYP27C1;FADS6;LONP2;ARNT;PDP2;THEM4;DHTKD1;ACSL6;PLIN5;ELOVL5;PTGS1;GGT5;GPI;PTGES2;ZADH2;PFKFB3;ENTPD5;PGM2L1;ACOX1;SCD;PFKFB2;SGPL1	transcription regulatory region DNA binding	24	0.000380487	E2F6;HMGB1;FOXK2;ZBED1;POU2F1;ELK4;REST;ESR1;NR2C2;SUV39H1;AR;PKNOX2;AGO2;ETV3;ETS1;SNAI2;REL;SKIL;HES2;HMGA2;BACH2;RREB1;MTF1;SOX2
mRNA catabolic process	12	0.000179736	CNOT4;FXR1;TNRC6B;MAPKAPK2;SYNCRIP;DDX6;BTG2;LARP1;CNOT6L;TNRC6A;SMG1;RBM8A	response to wounding	6	0.00475899	ACTB;ILK;TBXA2R;TRPC3;CD109;TGFBR1	Proteoglycans in cancer	23	1.73874e-05	CAV1;CDKN1A;ESR1;MAPK14;VEGFA;GRB2;PPP1R12A;SDC4;WNT3;PLCG1;MDM2;CAMK2G;ITGA2;WNT9B;ELK1;MAPK1;ANK1;CAMK2A;AKT2;TP53;PIK3R1;HPSE;DROSHA	mitochondrial intermembrane space	4	0.00197338	STAR;AK2;CYCS;TXNIP	positive regulation of cellular biosynthetic process	65	0.000816527	IRS1;MYB;MAP3K2;HMGB1;RPS6KA3;ELK4;CREBRF;MAVS;CDK9;BMPR2;PIAS2;IKZF3;HOXB5;SOX7;TIRAP;KDM5A;NFATC2;BMP7;CTCFL;ARNT;POU2F2;DBF4;ZBED1;ATF7IP;F2RL1;FGFR1;GMEB1;HEYL;MLXIP;REL;VHL;PLIN5;LDLR;POU2F1;ELOVL5;EZH1;ETS1;PTGES2;ONECUT1;ARID5B;ATXN7L3;EN2;HOXC13;IKBKG;PFKFB3;MICAL2;TRMT10C;GATA2;TGFBR1;KLF13;SMARCD1;ENTPD5;ACVR1B;HMBOX1;RAN;NFIB;MAPK1;KLF6;PFKFB2;RMND1;NPNT;NR2C2;MYO6;UHMK1;SETD7	negative regulation of RNA metabolic process	31	0.000381275	E2F6;TCERG1;HMGB1;ZNF417;CAV1;FOXK2;HMBOX1;POU2F1;ELK4;REST;ESR1;SUV39H1;AR;ETV3;MTDH;DNMT3B;SNAI2;NFIX;SKI;LIMS1;REL;SKIL;HES2;HMGA2;BACH2;RREB1;CBX5;PPM1F;TOB2;SOX2;ZNF12
cholesterol homeostasis	6	0.00018695	MYLIP;CAV1;HNF4A;RALY;TMEM97;GRAMD1B	cellular response to stress	11	0.00489374	MYB;SUV39H1;PHLDA3;SUSD6;UBE2N;MEN1;TAOK1;MAP3K9;GEN1;JMY;INIP	Chronic myeloid leukemia	13	1.82603e-05	CDKN1A;GRB2;CDK6;CDKN1B;SMAD4;MDM2;MAPK1;AKT2;TP53;TGFBR1;E2F2;PIK3R1;BAK1	cellular protein localization	23	0.00209102	TNPO1;TOR1AIP2;ZDHHC18;PIK3R2;VPS13D;ARL3;ARF1;GNAI1;SRSF7;TXNIP;PTPN14;TRIM67;ATG13;PIKFYVE;INSIG1;KCNB1;RBM8A;HOOK3;COL1A1;PPM1F;SEC16A;PRKAA1;FCHO2	organic acid metabolic process	41	0.000837417	IRS1;PDK1;L2HGDH;ST3GAL1;B3GNT2;PANK2;LIAS;CYP27C1;G6PC;FADS6;LONP2;TARS2;ARNT;PDP2;PSPH;IDS;THEM4;DHTKD1;PPM1K;QRSL1;GFPT1;UEVLD;ACSL6;PLIN5;ELOVL5;PTGS1;GGT5;GPI;PTGES2;ZADH2;IDH3A;PFKFB3;ENTPD5;PGM2L1;BNIP2;ACOX1;SCD;PFKFB2;CHSY1;SGPL1;CYB5R3	response to increased oxygen levels	4	0.000386598	CAV1;CDKN1A;DNMT3B;COL1A1
regulation of mRNA metabolic process	11	0.000200152	CELF4;REST;FXR1;TNRC6B;MAPKAPK2;SYNCRIP;BTG2;LARP1;CNOT6L;TNRC6A;RBM8A	protein modification by small protein removal	4	0.00549427	USP15;ACTB;TGFBR1;STAM	protein phosphorylation	116	1.85198e-05	EPHB1;CCND2;PABPN1;CSNK2A1;ABL2;MAP3K9;CCR5;IL5;ULK2;HACD3;HMGB1;CAV1;CTDSPL;CDKN1A;DSTYK;MAPK14;UHMK1;ABI2;ERC1;PAK3;GPR37L1;PDK3;CREB1;PTK6;IL6R;MYOCD;VEGFA;ERRFI1;PML;GRB2;DYRK2;CDK6;NDST1;OXSR1;CDKN1B;RPS6KA5;CCNE2;SMAD4;KLHDC10;RPS6KA3;SDC4;DDR1;RARA;IGFBP4;NRG4;DUSP9;NEK4;SESN2;FKBP8;GNG3;CFL1;SH3RF1;CCL11;PROX1;PRLR;GRIN2B;RASGRF1;FGF9;NPR1;MAPKAPK2;KSR2;PRKAB1;CAMK2G;DHX33;DVL1;SPRED1;RAP…	regulation of cellular protein localization	10	0.00213411	PIK3R2;GNAI1;PTPN14;TRIM67;ATG13;INSIG1;KCNB1;PPM1F;SEC16A;PRKAA1	regulation of generation of precursor metabolites and energy	9	0.000838791	IRS1;HMGB1;PNPT1;ARNT;GSK3B;PPP1R3B;PFKFB3;ENTPD5;PFKFB2	protein serine/threonine kinase activator activity	4	0.000386598	CAB39;TAOK1;STK4;DAZAP2
regulation of mRNA catabolic process	8	0.000201084	FXR1;TNRC6B;MAPKAPK2;SYNCRIP;BTG2;LARP1;CNOT6L;TNRC6A	histone H3-K9 modification	2	0.00552659	MYB;SUV39H1	protein kinase activity	51	2.15545e-05	EPHB1;CCND2;CSNK2A1;ABL2;MAP3K9;IL5;ULK2;CDKN1A;DSTYK;MAPK14;UHMK1;PAK3;PDK3;PTK6;DYRK2;CDK6;OXSR1;CDKN1B;RPS6KA5;CCNE2;RPS6KA3;DDR1;NRG4;NEK4;FGF9;NPR1;MAPKAPK2;KSR2;PRKAB1;CAMK2G;STK4;PRPF4B;STK35;EEF2K;EFNA3;MAPK1;RPS6KA4;MAP4K2;CAMK2A;STK11;ACVR2A;AKT2;SYK;TGFBR1;PHKG2;CCNT1;BMPR2;MYLK3;TAOK1;WNK3;CAB39	regulation of mRNA metabolic process	7	0.00214133	TNPO1;TNRC6B;TNRC6C;SRSF7;RBM8A;ZFP36L2;MBNL3	oxidation-reduction process	38	0.000863684	IRS1;L2HGDH;HMGB1;KIAA1191;PNPT1;FXN;PANK2;CYP27C1;G6PC;H6PD;FADS6;KDM5A;LONP2;COX20;DHTKD1;CYCS;KDM2B;GFPT1;NQO2;UEVLD;PLIN5;PTGS1;GPI;GSK3B;PTGES2;ZADH2;PPP1R3B;IDH3A;NXN;QSOX1;MICAL2;CYP20A1;TRMT9B;DNAJC24;PGM2L1;ACOX1;SCD;CYB5R3	regulatory region nucleic acid binding	24	0.00039288	E2F6;HMGB1;FOXK2;ZBED1;POU2F1;ELK4;REST;ESR1;NR2C2;SUV39H1;AR;PKNOX2;AGO2;ETV3;ETS1;SNAI2;REL;SKIL;HES2;HMGA2;BACH2;RREB1;MTF1;SOX2
sterol homeostasis	6	0.000201117	MYLIP;CAV1;HNF4A;RALY;TMEM97;GRAMD1B	tau protein binding	2	0.00552659	ACTB;TAOK1	anatomical structure formation involved in morphogenesis	74	2.61279e-05	EPHB1;SHB;CDH5;MYBPC1;HMGB1;CAV1;TM4SF1;MAPK14;CCBE1;CYBB;THBS2;ACTA1;VEGFA;PML;GRB2;SUFU;LEF1;SMAD4;VAV3;SDC4;RARA;WNT3;PAX2;AGO2;CFL1;CCL11;PROX1;PLCG1;CRB2;RORA;S1PR1;FGF9;RRP7A;NPR1;BHLHE40;PARVA;UNC5B;SRF;DVL1;HES2;SPRED1;ITGA2;STK4;FMN1;WNT9B;ITGA3;MTHFR;MCAM;EFNA3;PKNOX1;MAPK1;NFASC;HEYL;TBXA2R;TNFSF14;XRCC2;BCAS3;MTHFD1;SLC24A4;MYPN;RPL7L1;SYK;TGFBR1;E2F2;HPSE;BMPR2;SOX7;MYLK3;ADM2;SEMA5A…	regulation of intracellular transport	9	0.00219294	TRIM58;PIK3R2;ARF1;PTPN14;ATG13;INSIG1;KCNB1;SEC16A;PRKAA1	positive regulation of glycolytic process	4	0.000979085	ARNT;PFKFB3;ENTPD5;PFKFB2	protein kinase activator activity	6	0.000436582	CAB39;HMGB1;CDKN1A;TAOK1;STK4;DAZAP2
negative regulation of cellular amide metabolic process	8	0.000210912	CELF4;FXR1;TNRC6B;SYNCRIP;BTG2;LARP1;CNOT6L;TNRC6A	histone-lysine N-methyltransferase activity	2	0.00552659	SUV39H1;MEN1	regulation of mRNA catabolic process	18	3.97347e-05	SAMD4A;MAPK14;CARHSP1;IGF2BP1;YWHAZ;FXR1;AGO2;BTG2;CNOT6L;GTPBP1;PKP1;MAPKAPK2;PDE12;TARDBP;SERBP1;ZC3HAV1;METTL14;LARP1	cellular macromolecule localization	23	0.00224451	TNPO1;TOR1AIP2;ZDHHC18;PIK3R2;VPS13D;ARL3;ARF1;GNAI1;SRSF7;TXNIP;PTPN14;TRIM67;ATG13;PIKFYVE;INSIG1;KCNB1;RBM8A;HOOK3;COL1A1;PPM1F;SEC16A;PRKAA1;FCHO2	regulation of toll-like receptor 4 signaling pathway	4	0.000979085	HMGB1;TIRAP;F2RL1;LILRA2	negative regulation of developmental process	24	0.0004391	HMGB1;CAV1;CDKN1A;MBNL3;REST;STK4;WNT9B;DDX6;RAP1GAP2;FXN;SNAI2;FSTL3;SKI;SKIL;INSIG1;NTRK3;HMGA2;HOOK3;ZFP36L2;EPHA4;FRS2;TRAF3IP1;TOB2;SOX2
enteroendocrine cell differentiation	4	0.000213197	HNF4A;CDK6;RFX3;GSK3B	positive regulation of gene expression	11	0.0058357	MYB;ACTB;UBTF;CITED4;MEN1;BRPF1;ILK;TGFBR1;SMARCD1;PPM1F;RBMS3	neurotrophin TRK receptor binding	4	4.64414e-05	GRB2;PLCG1;PIK3R1;EFNA5	cytokinetic process	3	0.00226374	ARF1;RHOA;ANXA11	dephosphorylation	22	0.00100742	G6PC;ENSA;PTPN14;PDP2;PSPH;APTX;CYCS;PPM1K;GSK3B;FKBP1A;PPP1R3B;PFKFB3;GNAI2;MTMR3;CDC14B;PPP1R26;PPM1L;PTP4A1;MTMR9;PFKFB2;PPP1R14C;NPNT	Schwann cell development	4	0.00044408	ADAM22;NCMAP;SKI;NTRK3
pancreas development	6	0.000216116	HNF4A;CDK6;IL6R;RFX3;SMAD2;GSK3B	positive regulation of cellular biosynthetic process	11	0.0060216	MYB;UBTF;CITED4;MEN1;BRPF1;ILK;TGFBR1;SMARCD1;JMY;RBMS3;ARID5B	neurotrophin TRKA receptor binding	4	4.64414e-05	GRB2;PLCG1;PIK3R1;EFNA5	positive regulation of cellular catabolic process	8	0.00243321	TNRC6B;VPS13D;TNRC6C;ULK1;TRIM65;TRIM67;ZFP36L2;PRKAA1	regulation of carbohydrate catabolic process	6	0.00104482	HMGB1;ARNT;PPP1R3B;PFKFB3;ENTPD5;PFKFB2	cellular response to extracellular stimulus	11	0.00045304	SLC38A2;P2RX3;CDKN1A;WNT9B;CASTOR2;SNAI2;SESN3;GLUL;KCNB1;COL1A1;PRKAA1
Human cytomegalovirus infection	10	0.000219131	CDK6;IL6R;HLA-C;AKAP13;CCR5;GNG3;ELK1;CALML3;PIK3R2;GSK3B	chromatin remodeling	3	0.00604034	MYB;ACTB;SMARCD1	Neurotrophin signaling pathway	16	4.70366e-05	SH2B3;MAPK14;GRB2;RPS6KA5;RPS6KA3;PLCG1;MAPKAPK2;CAMK2G;RAP1A;MAPK1;CALML3;CAMK2A;AKT2;TP53;PIK3R1;PRDM4	negative regulation of cellular protein metabolic process	15	0.0024559	MGAT5;FNIP1;CRY2;TNRC6B;PIK3R2;TNRC6C;AGO1;NTRK3;PPM1F;ZFP36L2;EPHA4;PRKAA1;TRAF3IP1;IREB2;SIAH2	brain development	30	0.00106762	NLGN4X;HOOK3;BMPR2;BMP7;CRK;GNB4;GRIN2B;SEMA5A;FGFR1;KDM2B;ZNF430;SPATA5;BCL2L11;SLC38A2;CTNND1;EZH1;ETS1;GSK3B;EN2;ATXN1L;AFF2;PFKFB3;HMGCS1;BTG2;GATA2;TYRO3;ATXN1;SOCS7;RAN;NFIB	nucleoplasm part	27	0.000531735	E2F6;CDKN1A;AFF1;HMBOX1;REST;SH3BP5;STK4;PRPF4B;SUV39H1;AR;RSRC1;ETV3;CPSF7;JADE2;MTDH;SPRTN;GTF2H1;SKI;RNF111;HBP1;RREB1;CBX5;NCBP3;RBM8A;SAP30L;DAZAP2;PRKAA1
Kaposi sarcoma-associated herpesvirus infection	9	0.0002418	CDK6;HLA-C;CCR5;GNG3;MAPKAPK2;CALML3;PIK3R2;SYK;GSK3B	transcription regulatory region DNA binding	7	0.00606009	MYB;ACTB;UBTF;SUV39H1;PKNOX2;MEN1;ARID5B	FoxO signaling pathway	17	4.81829e-05	CCND2;SOD2;CDKN1A;MAPK14;GRB2;CDKN1B;SMAD4;S1PR1;MDM2;PRKAB1;STK4;MAPK1;STK11;AKT2;TGFBR1;CSNK1E;PIK3R1	negative regulation of biosynthetic process	20	0.00265688	FNIP1;ZHX3;NR3C1;CRY2;TNRC6B;ORMDL2;TNRC6C;TAL1;RHOA;AGO1;TXNIP;NCOR2;DOT1L;SKIL;INSIG1;PPM1F;ZFP36L2;PRKAA1;IREB2;SIAH2	oxoacid metabolic process	40	0.00107952	IRS1;PDK1;L2HGDH;ST3GAL1;B3GNT2;PANK2;LIAS;CYP27C1;FADS6;LONP2;TARS2;ARNT;PDP2;PSPH;IDS;THEM4;DHTKD1;PPM1K;QRSL1;GFPT1;UEVLD;ACSL6;PLIN5;ELOVL5;PTGS1;GGT5;GPI;PTGES2;ZADH2;IDH3A;PFKFB3;ENTPD5;PGM2L1;BNIP2;ACOX1;SCD;PFKFB2;CHSY1;SGPL1;CYB5R3	transcriptional repressor complex	6	0.00064928	HMGB1;REST;SUV39H1;ETV3;SKI;CBX5
RNA degradation	6	0.000248754	CNOT4;TOB2;DDX6;BTG2;CNOT6L;DIS3L	regulatory region nucleic acid binding	7	0.00613294	MYB;ACTB;UBTF;SUV39H1;PKNOX2;MEN1;ARID5B	positive regulation of cellular component organization	80	5.23798e-05	EPHB1;SURF4;ABL2;IL5;PHF19;RAB21;CAV1;PALM;ESR1;FBXW8;MAPK14;ABI2;PAK3;THBS2;CRTC1;TRIOBP;CREB1;PTK6;VEGFA;PML;GRB2;YWHAZ;NLGN2;CDKN1B;RPS6KA5;SMAD4;ADD1;HPS4;SDC4;WNT3;CNOT6L;CALR;CFL1;NTN1;CCL11;PROX1;BBC3;CAPRIN1;DHX33;SRF;DVL1;RAP1A;ITGA2;FMN1;KAT7;ITGA3;EEF2K;LIMS1;GPSM2;TFDP2;GDI1;MAPK1;OPTN;ANK1;UBE2N;CREB3L2;ADGRL1;ATL3;RPS6KA4;FOSL1;STK11;TNFSF14;BCAS3;AKT2;TP53;SYK;TGFBR1;BMPR2;MYLK3;MI…	negative regulation of signal transduction	17	0.00280046	FNIP1;CRY2;MTRNR2L1;PIK3R2;MCL1;RHOA;NCOR2;TRIM67;CASTOR2;SKIL;INSIG1;NTRK3;LRPAP1;EPHA4;PRKAA1;TRAF3IP1;SIAH2	purine ribonucleotide biosynthetic process	14	0.0010818	PDK1;PANK2;ARNT;PDP2;DHTKD1;PANK3;ACSL6;ELOVL5;GPI;PFKFB3;ENTPD5;PGM2L1;SCD;PFKFB2	kinase activator activity	6	0.000691399	CAB39;HMGB1;CDKN1A;TAOK1;STK4;DAZAP2
negative regulation of protein metabolic process	25	0.000249583	OPHN1;PPP1R1A;SF3B3;CAV1;GAS1;PPP1R11;GMFB;MYOCD;CELF4;FXR1;ERRFI1;LEF1;SMAD4;MDM4;ARPP19;TNRC6B;SYNCRIP;BTG2;PIK3R2;LARP1;CNOT6L;TNRC6A;SRCIN1;USP7;GSK3B	regulation of protein phosphorylation	9	0.00617683	ACTB;UBE2N;MEN1;ILK;TAOK1;CD109;TGFBR1;MAP3K9;PPM1F	ErbB signaling pathway	13	6.20028e-05	ABL2;CDKN1A;PAK3;GRB2;CDKN1B;NRG4;PLCG1;CAMK2G;ELK1;MAPK1;CAMK2A;AKT2;PIK3R1	translation	11	0.00281892	TNRC6B;MRPS18B;TNRC6C;RHOA;AGO1;MRPS21;RBM8A;ZFP36L2;QKI;SECISBP2L;IREB2	positive regulation of cellular catabolic process	18	0.0011674	IRS1;HMGB1;PNPT1;TRIM65;ARNT;PLIN5;LDLR;BCL2L11;GSK3B;TRIM67;IKBKG;PFKFB3;BTG2;TMEM59;ENTPD5;ZC3H12D;TNRC6B;PFKFB2	regulation of protein modification process	38	0.000692115	CAB39;MGAT5;PPP1R1A;HMGB1;CAV1;CTDSPL;CDKN1A;TLR7;SH3BP5;TAOK1;ARPP19;STK4;WNT9B;MTHFR;AR;CD3E;TMEM189-UBE2V1;MINK1;GNL3L;DNMT3B;SPRTN;SNAI2;GTF2H1;SKI;FER;NTRK3;RNF111;HMGA2;IL6R;PPM1F;DAZAP2;EPHA4;FRS2;PRKAA1;TRAF3IP1;SOX2;IGF1R;CDK2AP1
regulation of transport	36	0.000256362	OPHN1;IRS1;HMGB1;CAV1;PPIA;HNF4A;GAS1;PPP1R11;TPCN2;BCL2;GRM7;CLIC5;RFX3;REST;PPP1R12A;SMAD4;ARPP19;SYT7;KCTD7;STC2;RAB11B;RAB5B;PRRT2;GDI1;PIK3R2;SYK;MIEF1;EFNA5;PTPN14;SDC4;SHISA9;SRCIN1;TCAF1;XPO4;PEA15;GSK3B	platelet activation	3	0.00649531	ACTB;ILK;TRPC3	lymph vessel development	7	6.22138e-05	LGALS8;CCBE1;VEGFA;PROX1;SYK;BMPR2;VASH1	positive regulation of cellular component organization	17	0.00282456	FNIP1;TRIM58;VPS13D;ULK1;ARF1;TAL1;RHOA;TRIM67;ATG13;SKIL;NTRK3;PPM1F;JMY;DDB1;EPHA4;PRKAA1;AKIRIN1	positive regulation of nucleotide catabolic process	4	0.00118778	ARNT;PFKFB3;ENTPD5;PFKFB2	negative regulation of cell cycle	17	0.000703605	CAB39;E2F6;CTDSPL;CDKN1A;NME6;TAOK1;SKIL;HMGA2;BTG1;HBP1;CBX5;JMY;ZFP36L2;CASP2;PRKAA1;CNOT6L;SOX2
Gastric cancer	8	0.000266157	MET;BCL2;CCNE2;LEF1;SMAD4;SMAD2;PIK3R2;GSK3B	positive regulation of RNA metabolic process	10	0.00662264	MYB;UBTF;CITED4;MEN1;BRPF1;ILK;TGFBR1;SMARCD1;JMY;ARID5B	one-carbon metabolic process	7	6.22138e-05	DHFR2;MAT2A;MAT1A;MTHFR;MTHFD1;AHCYL2;AHCY	positive regulation of leukocyte adhesion to vascular endothelial cell	2	0.00282456	RHOA;NFAT5	positive regulation of coenzyme metabolic process	4	0.00118778	ARNT;PFKFB3;ENTPD5;PFKFB2	transferase activity, transferring phosphorus-containing groups	25	0.000710215	CAB39;CDKN1A;PIGO;ETNK1;IRAK4;NME6;ESR1;SAMD8;TAOK1;STK4;PRPF4B;POLD3;FN3K;MINK1;PIP4K2C;MAPK13;GTF2H1;FER;PIKFYVE;NTRK3;EPHA4;FRS2;GRK3;PRKAA1;IGF1R
regulation of nuclear-transcribed mRNA poly(A) tail shortening	3	0.000276797	TNRC6B;BTG2;TNRC6A	positive regulation of biosynthetic process	11	0.00676134	MYB;UBTF;CITED4;MEN1;BRPF1;ILK;TGFBR1;SMARCD1;JMY;RBMS3;ARID5B	cell morphogenesis involved in differentiation	53	6.85204e-05	TSKU;EPHB1;ULK2;RNF165;RAB21;FBXW8;STC1;PAK3;TRIOBP;CREB1;VEGFA;GRB2;LAMC1;RPS6KA5;LEF1;SMAD4;UST;DPYSL2;WNT3;PAX2;CALR;CFL1;NTN1;PROX1;PLCG1;PARVA;CAPRIN1;UNC5B;SRF;DVL1;UNK;EEF2K;LIMS1;GDI1;EFNA3;MAPK1;NFASC;RAB10;CAMK2A;STK11;SLC11A2;MYPN;CABP4;VSIG1;PIK3R1;BMPR2;SEMA5A;EFNA5;VWA1;ANTXR1;PLXNA3;PLXND1;RAPH1	regulation of nuclear-transcribed mRNA poly(A) tail shortening	2	0.00282456	TNRC6B;TNRC6C	cellular polysaccharide catabolic process	4	0.00118778	HMGB1;G6PC;PPP1R3B;PGM2L1	Cul4-RING E3 ubiquitin ligase complex	4	0.00073571	DDA1;TRPC4AP;DCAF16;DDB1
positive regulation of nuclear-transcribed mRNA poly(A) tail shortening	3	0.000276797	TNRC6B;BTG2;TNRC6A	positive regulation of cell-matrix adhesion	2	0.00678513	ILK;PPM1F	regulation of mRNA metabolic process	26	7.88585e-05	PABPN1;SAMD4A;MAPK14;CARHSP1;CELF4;TRA2B;IGF2BP1;YWHAZ;REST;FXR1;SRSF10;AGO2;BTG2;CNOT6L;GTPBP1;PKP1;MAPKAPK2;PDE12;CELF1;TARDBP;SERBP1;ZC3HAV1;CCNT1;METTL14;LARP1;MBNL1	positive regulation of nuclear-transcribed mRNA poly(A) tail shortening	2	0.00282456	TNRC6B;TNRC6C	hexose metabolic process	14	0.00122107	IRS1;PDK1;HMGB1;G6PC;H6PD;SLC35B4;GPI;GSK3B;ONECUT1;PPP1R3B;PFKFB3;PGM2L1;PMAIP1;PFKFB2	negative regulation of nucleobase-containing compound metabolic process	32	0.000837487	E2F6;TCERG1;HMGB1;ZNF417;CAV1;FOXK2;HMBOX1;POU2F1;ELK4;REST;ESR1;SUV39H1;AR;ETV3;MTDH;GNL3L;DNMT3B;SNAI2;NFIX;SKI;LIMS1;REL;SKIL;HES2;HMGA2;BACH2;RREB1;CBX5;PPM1F;TOB2;SOX2;ZNF12
response to sterol	4	0.000283553	CCR5;SMAD2;GRAMD1B;HMGCS1	transforming growth factor beta receptor binding	2	0.00705103	USP15;TGFBR1	whole membrane	101	8.80454e-05	EPHB1;SURF4;CD55;ULK2;TMEM109;RAB21;P2RX3;CACNG8;RPH3AL;CAV1;PPP2R1B;GJA1;VAMP2;VAMP1;NFAM1;GOSR2;CYBB;ATP2B1;SIGLEC14;ACAP2;PGR;PML;STARD7;PHACTR2;AGK;VPS37B;ADD1;ANTXR2;CD164;SLC6A17;RAB7A;SDC4;WNT3;PEX11B;PGAM5;LETMD1;RPH3A;CALR;ATP6V1A;RAB11B;CRB2;RAB5C;S1PR1;RAB5B;MDM2;PKP1;UNC5B;CAMK2G;SPRED1;RAP1A;SAR1B;FAM210B;SLC48A1;ECE1;MAGT1;PRRT2;BORCS7;TECPR1;GNB4;AP2M1;PEX26;MAPK1;OPTN;ADCY2;NFASC;…	Cul4A-RING E3 ubiquitin ligase complex	2	0.00282456	TRPC4AP;DDB1	generation of precursor metabolites and energy	22	0.00125571	IRS1;HMGB1;PNPT1;FXN;PANK2;G6PC;ARNT;COX20;DHTKD1;CYCS;GFPT1;NQO2;GPI;GSK3B;PTGES2;PPP1R3B;IDH3A;PFKFB3;ENTPD5;PGM2L1;ACOX1;PFKFB2	negative regulation of cell communication	30	0.000918016	RPH3AL;SOD2;CAV1;PALM;REST;ESR1;TNFAIP8L1;STK4;AR;CD3E;CASTOR2;GRINA;FXN;SNAI2;FSTL3;SESN3;SKI;BID;SKIL;INSIG1;NTRK3;LRPAP1;SOCS7;PADI2;KCNB1;EPHA4;PRKAA1;TRAF3IP1;SOX2;IGF1R
regulation of cellular localization	22	0.000294668	OPHN1;CAV1;GAS1;BCL2;PPP1R12A;CCNE2;SYT7;IQSEC2;RAB11B;ITGA3;GDI1;PIK3R2;STK11;SYK;MIEF1;EFNA5;PTPN14;STX6;TP53INP2;TCAF1;XPO4;GSK3B	positive regulation of stress fiber assembly	2	0.0073216	TGFBR1;PPM1F	negative regulation of cellular macromolecule biosynthetic process	87	9.39817e-05	NONO;KCNIP3;GATAD2A;HMGB1;ZNF417;SAMD4A;CAV1;ESR1;CBX5;DKK3;BACE2;NACC1;CREB1;GNL3L;RFX3;MYOCD;VEGFA;KDM5C;CELF4;E2F5;IGF2BP1;PML;SUFU;HIC2;REST;NSD2;FXR1;CDKN1B;RPS6KA5;LEF1;SMAD4;MDM4;RARA;CBX2;PAX2;AGO2;BTG2;CNOT6L;SESN2;CALR;PROX1;FGF9;MDM2;BASP1;BHLHE40;CAPRIN1;SRF;HES2;ZNF268;MNT;UNK;WWC1;HOXC8;CELF1;NFX1;PTPN2;KAT7;SUV39H1;TSHZ2;LIMS1;TFDP2;ZNF154;ZNF485;CC2D1B;HEYL;PEX2;CNBP;TP53;MIER3;E2…	positive regulation of cellular component biogenesis	10	0.00286415	FNIP1;ULK1;ARF1;TAL1;RHOA;NTRK3;PPM1F;JMY;DDB1;AKIRIN1	regulation of mRNA metabolic process	15	0.00126578	PNPT1;CDK9;RBM4B;TIRAP;DCP1A;CACNG7;RBM8A;PABPN1;BTG2;CELF1;RBM7;ZC3H12D;TNRC6B;YTHDC1;NUP214	cell cycle arrest	10	0.000918587	CAB39;CDKN1A;SKIL;HMGA2;HBP1;JMY;CASP2;PRKAA1;CNOT6L;SOX2
axon part	13	0.00029653	OPHN1;SYT7;NPTXR;MYH14;BASP1;PTPRN2;ITGA3;ELK1;PRRT2;NFASC;CABP4;CBX6;ANK1	transcription coactivator activity	4	0.00758872	CITED4;SMARCD1;JMY;ARID5B	transferase complex, transferring phosphorus-containing groups	25	9.61877e-05	POLD3;CCND2;CDKN1A;ERC1;PRPS1;CDK6;CCNE2;RPRD2;SESN2;PIK3C2B;PRKAB1;POLD4;GTF2F1;ACVR2A;PEX2;TP53;TGFBR1;PRPSAP1;PHKG2;CCNT1;PIK3R1;PRKAR2A;POLR2E;GTF2H5;CAB39	positive regulation of intracellular transport	6	0.00310037	PIK3R2;ARF1;ATG13;KCNB1;SEC16A;PRKAA1	positive regulation of toll-like receptor 4 signaling pathway	3	0.0012665	HMGB1;TIRAP;F2RL1	positive regulation of cell migration	15	0.000930241	MGAT5;HMGB1;SOD2;CAV1;AGO2;ETS1;CD151;SNAI2;FER;NTRK3;IL6R;RREB1;COL1A1;PPM1F;IGF1R
distal axon	11	0.000310842	OPHN1;SYT7;NPTXR;MYH14;BASP1;PTPRN2;ITGA3;ELK1;PRRT2;CABP4;CBX6	actin filament-based process	6	0.0079555	ACTB;ILK;TAOK1;TGFBR1;PPM1F;JMY	lymph vessel morphogenesis	6	0.00010078	LGALS8;CCBE1;VEGFA;PROX1;BMPR2;VASH1	gene silencing by miRNA	4	0.0031716	TNRC6B;TNRC6C;AGO1;NCOR2	carbohydrate phosphatase activity	3	0.0012665	G6PC;PFKFB3;PFKFB2	negative regulation of signaling	30	0.000963681	RPH3AL;SOD2;CAV1;PALM;REST;ESR1;TNFAIP8L1;STK4;AR;CD3E;CASTOR2;GRINA;FXN;SNAI2;FSTL3;SESN3;SKI;BID;SKIL;INSIG1;NTRK3;LRPAP1;SOCS7;PADI2;KCNB1;EPHA4;PRKAA1;TRAF3IP1;SOX2;IGF1R
protein localization to membrane	17	0.000354042	CAV1;PALM;BCL2;MOAP1;AGK;SRP14;ZDHHC22;IQSEC2;UBL4A;RAB11B;ITGA3;GDI1;NFASC;TSPAN14;MIEF1;TCAF1;ANK1	activation of protein kinase activity	4	0.00801111	UBE2N;TAOK1;TGFBR1;MAP3K9	Non-small cell lung cancer	11	0.000101829	CDKN1A;GRB2;CDK6;PLCG1;STK4;MAPK1;AKT2;TP53;E2F2;PIK3R1;BAK1	cellular response to epidermal growth factor stimulus	3	0.00320159	COL1A1;ZFP36L2;IREB2	sugar-phosphatase activity	3	0.0012665	G6PC;PFKFB3;PFKFB2	positive regulation of locomotion	16	0.000964874	MGAT5;HMGB1;SOD2;CAV1;AGO2;ETS1;CD151;SNAI2;FER;NTRK3;IL6R;RREB1;COL1A1;PPM1F;DDB1;IGF1R
mRNA metabolic process	20	0.000356542	SF3B3;CNOT4;RALY;CELF4;REST;FXR1;GTF2H5;QKI;TNRC6B;MAPKAPK2;SYNCRIP;DDX6;BTG2;LARP1;POLR2E;CNOT6L;TNRC6A;SMG1;RBM8A;PNN	blood coagulation	4	0.00809741	ACTB;ILK;TBXA2R;TRPC3	Human cytomegalovirus infection	23	0.000102362	CCR5;CDKN1A;MAPK14;CREB1;IL6R;VEGFA;GRB2;CDK6;CALR;GNG3;MDM2;ADCY6;ELK1;GNB4;MAPK1;CALML3;ADCY2;CREB3L2;AKT2;TP53;E2F2;PIK3R1;BAK1	response to glucocorticoid	5	0.00333664	STAR;NR3C1;RHOA;NTRK3;ZFP36L2	pyruvate metabolic process	9	0.00131139	PDK1;ARNT;PDP2;DHTKD1;GPI;PFKFB3;ENTPD5;PGM2L1;PFKFB2	kinase activity	22	0.000970044	CAB39;CDKN1A;ETNK1;IRAK4;NME6;ESR1;TAOK1;STK4;PRPF4B;FN3K;MINK1;PIP4K2C;MAPK13;GTF2H1;FER;PIKFYVE;NTRK3;EPHA4;FRS2;GRK3;PRKAA1;IGF1R
regulation of establishment of protein localization	19	0.000364311	IRS1;HMGB1;PPIA;HNF4A;PPP1R11;BCL2;RFX3;REST;SYT7;GDI1;PIK3R2;SYK;MIEF1;EFNA5;PTPN14;SRCIN1;TCAF1;XPO4;GSK3B	Hepatocellular carcinoma	3	0.0082464	ACTB;TGFBR1;SMARCD1	positive regulation of protein phosphorylation	67	0.000103457	EPHB1;CCND2;MAP3K9;IL5;HACD3;HMGB1;CAV1;CDKN1A;DSTYK;MAPK14;PAK3;GPR37L1;PTK6;IL6R;VEGFA;NDST1;OXSR1;CDKN1B;RPS6KA5;SMAD4;KLHDC10;SDC4;DDR1;IGFBP4;DUSP9;NEK4;GNG3;SH3RF1;CCL11;PROX1;PRLR;FGF9;MAPKAPK2;DHX33;DVL1;RAP1A;OSBPL8;WWC1;STK4;DIRAS2;SENP2;CCL22;SYAP1;MAPK1;UBE2N;RPS6KA4;MAP4K2;MAPK8IP3;STK11;ACVR2A;AKT2;TP53;S1PR2;SYK;TGFBR1;CCNT1;PRKAR2A;BMPR2;GPR55;IL23R;SAMD5;EFNA5;TAOK1;NCAPG2;WNK3;C…	negative regulation of TOR signaling	3	0.00341362	FNIP1;CASTOR2;PRKAA1	positive regulation of nucleobase-containing compound metabolic process	62	0.00135755	MYB;MAP3K2;HMGB1;RPS6KA3;ELK4;CREBRF;PNPT1;MAVS;CDK9;BMPR2;PIAS2;IKZF3;HOXB5;SOX7;KDM5A;NFATC2;BMP7;CTCFL;ARNT;POU2F2;DBF4;ZBED1;ATF7IP;F2RL1;FGFR1;GMEB1;HEYL;MLXIP;REL;VHL;POU2F1;EZH1;ETS1;PTGES2;ONECUT1;ARID5B;ATXN7L3;EN2;HOXC13;IKBKG;PFKFB3;BTG2;MICAL2;GATA2;TGFBR1;RIF1;KLF13;SMARCD1;ENTPD5;ACVR1B;ZC3H12D;HMBOX1;RAN;TNRC6B;NFIB;MAPK1;KLF6;PFKFB2;NPNT;NR2C2;MYO6;SETD7	cellular response to oxygen-containing compound	26	0.000983856	ACACA;P2RX3;HMGB1;SOD2;CAV1;ESR1;WNT9B;AR;CASTOR2;NDOR1;MAPK13;FXN;MTDH;DNMT3B;ETS1;SNAI2;SESN3;FER;INSIG1;NTRK3;SOCS7;KCNB1;COL1A1;EPHA4;PRKAA1;IGF1R
posttranscriptional regulation of gene expression	15	0.000367559	CAV1;CELF4;FXR1;MYCN;QKI;TNRC6B;MAPKAPK2;SMAD2;SYNCRIP;BTG2;LARP1;POLR2E;CNOT6L;TNRC6A;RBM8A	positive regulation of protein kinase activity	5	0.00842468	UBE2N;ILK;TAOK1;TGFBR1;MAP3K9	Cushing syndrome	18	0.000105673	CDKN1A;CREB1;CDK6;CDKN1B;CCNE2;LEF1;WNT3;ADCY6;CAMK2G;DVL1;RAP1A;WNT9B;MAPK1;ADCY2;CREB3L2;CAMK2A;E2F2;MC2R	positive regulation of mRNA catabolic process	3	0.00341362	TNRC6B;TNRC6C;ZFP36L2	neuron death	17	0.00140516	DCC;MYB;XRCC2;GRIN2B;KDM2B;REL;BCL2L11;EFNB2;GPI;GSK3B;EN2;CBL;IKBKG;BTG2;BHLHB9;RILPL1;TYRO3	negative regulation of signal transduction	28	0.00112453	RPH3AL;SOD2;CAV1;PALM;ESR1;TNFAIP8L1;STK4;AR;CD3E;CASTOR2;GRINA;FXN;SNAI2;FSTL3;SESN3;SKI;BID;SKIL;INSIG1;NTRK3;LRPAP1;SOCS7;PADI2;EPHA4;PRKAA1;TRAF3IP1;SOX2;IGF1R
Neurotrophin signaling pathway	7	0.00037159	IRS1;BCL2;RPS6KA5;MAPKAPK2;CALML3;PIK3R2;GSK3B	coagulation	4	0.00844874	ACTB;ILK;TBXA2R;TRPC3	mammary gland development	17	0.000111026	CAV1;ESR1;CREB1;VEGFA;PGR;PML;LEF1;DDR1;WNT3;NTN1;CCL11;SLC29A1;PRLR;ITGA2;MAPK1;AKT2;GPAT4	organonitrogen compound biosynthetic process	22	0.00348914	MGAT5;AK2;MMAB;TNRC6B;ZDHHC18;ORMDL2;MRPS18B;TNRC6C;RHOA;AGO1;GALNT2;MRPS21;GXYLT1;COX10;SDC3;RBM8A;ZFP36L2;GLCE;PRKAA1;QKI;SECISBP2L;IREB2	sulfur compound metabolic process	18	0.00141306	PDK1;ST3GAL1;B3GNT2;FXN;LIAS;CIAO1;GSTM3;IBA57;PDP2;IDS;THEM4;ACSL6;ELOVL5;GGT5;HMGCS1;MICAL2;SCD;CHSY1	Schwann cell differentiation	4	0.00114191	ADAM22;NCMAP;SKI;NTRK3
kinase binding	19	0.000383802	IRS1;CAV1;TPCN2;ERRFI1;PPP1R12A;CCNE2;MYCN;LDHA;AKAP13;PITPNM3;MAPKAPK2;PIK3R2;MAP4K2;SYK;PTPN14;SDC4;SRCIN1;NEK9;GSK3B	hemostasis	4	0.00853812	ACTB;ILK;TBXA2R;TRPC3	posttranscriptional regulation of gene expression	39	0.000128239	YTHDF1;SAMD4A;CAV1;ESR1;MAPK14;UHMK1;CARHSP1;TRUB2;CELF4;CASC3;IGF2BP1;EIF4H;YWHAZ;FXR1;MYCN;RPS6KA3;RARA;AGO2;BTG2;CNOT6L;SESN2;CALR;MAPKAPK2;PDE12;CAPRIN1;UNK;ITGA2;CELF1;TARDBP;MAPK1;SERBP1;AKT2;TP53;METTL14;LARP1;POLR2E;XPO5;LIN28B;DROSHA	protein kinase binding	11	0.00351187	NR3C1;PIK3R2;CKS1B;RHOA;PTPN14;ATG13;ELP2;IFNAR2;EPHA4;DAZAP2;FRS2	fatty acid metabolic process	18	0.0015515	IRS1;PDK1;PANK2;LIAS;FADS6;LONP2;PDP2;THEM4;ACSL6;PLIN5;ELOVL5;PTGS1;GGT5;PTGES2;ZADH2;ACOX1;SCD;SGPL1	regulatory RNA binding	4	0.00114191	TLR7;AGO3;AGO2;SOX2
Colorectal cancer	6	0.00039455	BCL2;LEF1;SMAD4;SMAD2;PIK3R2;GSK3B	regulation of supramolecular fiber organization	4	0.00871873	TAOK1;TGFBR1;PPM1F;JMY	Focal adhesion	21	0.000129127	CCND2;CAV1;PAK3;THBS2;VEGFA;GRB2;LAMC1;PPP1R12A;VAV3;RASGRF1;XIAP;PARVA;RAP1A;ITGA2;ITGA3;ELK1;MAPK1;TLN2;AKT2;PIK3R1;MYLK3	cellular response to ketone	4	0.00356874	STAR;NR3C1;GNAI1;PRKAA1	negative regulation of phosphoprotein phosphatase activity	6	0.00155774	ENSA;GSK3B;FKBP1A;GNAI2;PPP1R26;PPP1R14C	DNA-binding transcription factor activity	36	0.00122711	E2F6;ZNF417;AFF1;ZBTB34;FOXK2;HMBOX1;GATAD1;MBNL3;ZBED1;POU2F1;ELK4;REST;ESR1;NR2C2;AR;PKNOX2;ETV3;DNMT3B;ETS1;SNAI2;NFIX;SKI;REL;UNKL;SKIL;HES2;ZNF483;HMGA2;BACH2;HBP1;RREB1;ZFP36L2;ZBTB37;MTF1;SOX2;ZNF12
Focal adhesion	9	0.00039765	CAV1;MET;BCL2;LAMC1;PPP1R12A;ITGA3;ELK1;PIK3R2;GSK3B	histone methyltransferase activity	2	0.00874378	SUV39H1;MEN1	sequence-specific double-stranded DNA binding	58	0.000130047	NONO;KCNIP3;SPIB;CREBRF;ESR1;MACC1;CREB1;SMARCC1;RFX3;MYOCD;PGR;HIC2;REST;ZNF704;LEF1;SMAD4;SSBP2;MYCN;KLF13;RARA;PAX2;NRF1;PROX1;RORA;CHD4;MAZ;BHLHE40;DHX33;SRF;HES2;MNT;NFX1;PCGF3;KAT7;TARDBP;ELK1;SUV39H1;GRWD1;TFDP2;MAFF;CC2D1B;GMEB1;HEYL;MLXIP;CREB3L2;FOSL1;IKZF3;CNBP;TP53;E2F2;ZBTB16;NFIC;KDM2B;REL;BACH2;PRDM4;POU2F1;GTF2H5	nuclear envelope	9	0.00361584	TMEM170A;TNPO1;TOR1AIP2;SCRN1;DCTN5;TMEM43;TUBB;AKIRIN1;ANXA11	polysaccharide catabolic process	4	0.00169502	HMGB1;G6PC;PPP1R3B;PGM2L1	regulation of apoptotic process	33	0.00128368	RNF144B;HMGB1;SOD2;CAV1;CDKN1A;AREL1;REST;ESR1;TNFAIP8L1;STK4;UBE2Z;AR;CD3E;GRINA;SERBP1;FXN;MTDH;SNAI2;BID;SKIL;NTRK3;HMGA2;BTG1;KCNB1;PPM1F;JMY;DDB1;EPHA4;CASP2;FRS2;PRKAA1;SOX2;IGF1R
Endocytosis	10	0.000417625	CAV1;VPS37B;HLA-C;CCR5;IQSEC2;RAB11B;RAB5B;SMAD2;RAB11FIP4;IL2RA	protein binding, bridging	3	0.00879287	AP2M1;MEN1;STAM	blood vessel morphogenesis	44	0.000138102	EPHB1;SHB;CDH5;HMGB1;CAV1;MAPK14;CCBE1;CYBB;THBS2;MYOCD;VEGFA;PML;LEF1;VAV3;AGO2;CCL11;PROX1;PLCG1;RORA;S1PR1;FGF9;NPR1;PARVA;UNC5B;SRF;SPRED1;RAP1A;STK4;MCAM;EFNA3;PKNOX1;TBXA2R;BCAS3;SYK;TGFBR1;E2F2;HPSE;BMPR2;HIF1AN;ADM2;SEMA5A;VASH1;BAK1;PLXND1	peptide biosynthetic process	11	0.00372688	TNRC6B;MRPS18B;TNRC6C;RHOA;AGO1;MRPS21;RBM8A;ZFP36L2;QKI;SECISBP2L;IREB2	regulation of toll-like receptor 2 signaling pathway	3	0.00171198	HMGB1;TIRAP;F2RL1	negative regulation of cellular protein metabolic process	24	0.00137903	OPHN1;MGAT5;PPP1R1A;SAMD4A;CAV1;CTDSPL;CDKN1A;YOD1;AGO3;SH3BP5;ARPP19;UBE2Z;AGO2;GNL3L;DNMT3B;SKI;NTRK3;PPM1F;ZFP36L2;EPHA4;PRKAA1;CNOT6L;TRAF3IP1;IGF1R
gene silencing by RNA	7	0.000432083	FXR1;MYCN;TNRC6B;SMAD2;POLR2E;CNOT6L;TNRC6A	chromatin binding	5	0.00890334	ACTB;UBTF;SUV39H1;MEN1;SMARCD1	myeloid cell homeostasis	17	0.000144057	HMGB1;MAPK14;VEGFA;CDK6;ADD1;KLF13;RPS24;SRF;FAM210B;FANCC;PTPN2;PKNOX1;ACVR2A;SLC11A2;MTHFD1;BAK1;NCAPG2	cullin-RING ubiquitin ligase complex	5	0.00373613	FBXO44;CKS1B;TRPC4AP;DCAF16;DDB1	spanning component of membrane	3	0.00171198	NLGN4X;BMPR2;NLGN2	regulation of cell death	35	0.0013875	RNF144B;HMGB1;SOD2;CAV1;CDKN1A;AREL1;REST;ESR1;TNFAIP8L1;STK4;UBE2Z;AR;CD3E;GRINA;SERBP1;FXN;MTDH;SNAI2;BID;REL;SKIL;NTRK3;LRPAP1;HMGA2;BTG1;KCNB1;PPM1F;JMY;DDB1;EPHA4;CASP2;FRS2;PRKAA1;SOX2;IGF1R
nucleobase-containing compound catabolic process	16	0.000450511	HMGB1;CNOT4;FXR1;LDHA;ZBTB20;TNRC6B;MAPKAPK2;SYNCRIP;DDX6;BTG2;LARP1;CNOT6L;TNRC6A;SMG1;DIS3L;RBM8A	peptidyl-amino acid modification	8	0.00898523	MYB;PADI1;SUV39H1;MEN1;BRPF1;ILK;TGFBR1;PPM1F	cell morphogenesis involved in neuron differentiation	43	0.000157986	TSKU;EPHB1;ULK2;RNF165;RAB21;FBXW8;PAK3;TRIOBP;CREB1;VEGFA;GRB2;RPS6KA5;SMAD4;UST;DPYSL2;WNT3;PAX2;CFL1;NTN1;PLCG1;CAPRIN1;UNC5B;SRF;DVL1;UNK;EEF2K;GDI1;EFNA3;MAPK1;NFASC;RAB10;CAMK2A;STK11;SLC11A2;MYPN;CABP4;PIK3R1;BMPR2;SEMA5A;EFNA5;PLXNA3;PLXND1;RAPH1	catalytic complex	18	0.00381371	FBXO44;SF3A3;PIK3R2;ORMDL2;ULK1;GNAI1;CKS1B;TAL1;CYCS;AGO1;NCOR2;ATG13;TRPC4AP;RBM8A;SAP30L;DCAF16;DDB1;PRKAA1	cellular response to stress	62	0.00175785	PDK1;MYB;MAP3K2;HMGB1;RPS6KA3;CREBRF;PNPT1;FXN;MCM8;CDK9;BMPR2;UGGT1;USP14;ZNF652;XRCC2;SIK2;TIRAP;SMG1;EEF2K;NFATC2;BMP7;GSTM3;LRIG2;ARNT;CRK;MCTS1;APTX;IRAK4;F2RL1;PHLDA3;CYCS;ATG14;TMEM67;SAMD5;GFPT1;VHL;BCL2L11;SLC38A2;BTK;BCL6;ETS1;RAD51AP1;PEA15;GSK3B;CBL;IKBKG;BTG2;RAD18;MTMR3;CDC14B;CAB39;RIF1;COL4A3BP;MAP3K9;GEN1;STK4;NABP1;PMAIP1;CBX5;MAPK1;MYO6;SETD7	positive regulation of cell motility	15	0.00143267	MGAT5;HMGB1;SOD2;CAV1;AGO2;ETS1;CD151;SNAI2;FER;NTRK3;IL6R;RREB1;COL1A1;PPM1F;IGF1R
Staurosporine	3	0.000450512	MAPKAPK2;SYK;GSK3B	protein methylation	3	0.00907392	MYB;SUV39H1;MEN1	Small cell lung cancer	13	0.000159143	CDKN1A;CDK6;CDKN1B;LAMC1;CCNE2;XIAP;ITGA2;ITGA3;AKT2;TP53;E2F2;PIK3R1;BAK1	mitochondrial electron transport, cytochrome c to oxygen	2	0.00386042	CYCS;COX10	glycolytic process	7	0.0017581	ARNT;DHTKD1;GPI;PFKFB3;ENTPD5;PGM2L1;PFKFB2	negative regulation of protein metabolic process	25	0.00143281	OPHN1;MGAT5;PPP1R1A;SF3B3;SAMD4A;CAV1;CTDSPL;CDKN1A;YOD1;AGO3;SH3BP5;ARPP19;UBE2Z;AGO2;GNL3L;DNMT3B;SKI;NTRK3;PPM1F;ZFP36L2;EPHA4;PRKAA1;CNOT6L;TRAF3IP1;IGF1R
dendrite	17	0.000470481	OPHN1;PALM;ATXN1L;GRM7;FXR1;SYT7;NPTXR;GNG3;ELK1;PRRT2;NFASC;SHISA9;SRCIN1;RBM8A;CBX6;FRMPD4;GSK3B	protein alkylation	3	0.00907392	MYB;SUV39H1;MEN1	positive regulation of signaling	105	0.00017093	EPHB1;SHB;CSNK2A1;MAP3K9;SH2B3;CREBRF;IL5;RNF165;HACD3;P2RX3;CACNG8;HMGB1;CAV1;PPP2R1B;GJA1;ESR1;VAMP2;NFAM1;DSTYK;F2RL3;MAPK14;CCBE1;PAK3;GPR37L1;CRTC1;SKAP2;CREB1;PTK6;IL6R;MYOCD;VEGFA;PML;GRB2;YWHAZ;NDST1;NLGN2;SMAD4;VAV3;KLHDC10;PLAGL2;DDR1;LASP1;IGFBP4;WNT3;NRG4;DUSP9;CALR;FKBP8;GNG3;SH3RF1;CCL11;PRLR;GRIN2B;CRB2;RASGRF1;FGF9;BBC3;XIAP;NPR1;MAPKAPK2;UNC5B;DHX33;DVL1;SPRED1;RAP1A;ITGA2;OSBPL8…	aerobic electron transport chain	2	0.00386042	CYCS;COX10	ribonucleotide biosynthetic process	14	0.00186689	PDK1;PANK2;ARNT;PDP2;DHTKD1;PANK3;ACSL6;ELOVL5;GPI;PFKFB3;ENTPD5;PGM2L1;SCD;PFKFB2	regulation of programmed cell death	33	0.00149351	RNF144B;HMGB1;SOD2;CAV1;CDKN1A;AREL1;REST;ESR1;TNFAIP8L1;STK4;UBE2Z;AR;CD3E;GRINA;SERBP1;FXN;MTDH;SNAI2;BID;SKIL;NTRK3;HMGA2;BTG1;KCNB1;PPM1F;JMY;DDB1;EPHA4;CASP2;FRS2;PRKAA1;SOX2;IGF1R
regulation of protein transport	18	0.000471041	IRS1;HMGB1;PPIA;HNF4A;PPP1R11;RFX3;REST;SYT7;GDI1;PIK3R2;SYK;MIEF1;EFNA5;PTPN14;SRCIN1;TCAF1;XPO4;GSK3B	platelet aggregation	2	0.00934456	ACTB;ILK	positive regulation of protein metabolic process	100	0.000173608	EPHB1;CCND2;CSNK2A1;MAP3K9;IL5;MYLIP;PHF19;HACD3;RNF144B;YTHDF1;HMGB1;SAMD4A;CAV1;CDKN1A;DSTYK;FBXW8;MAPK14;UHMK1;CCBE1;PAK3;CYBB;GPR37L1;TRUB2;PTK6;IL6R;VEGFA;PML;REST;NDST1;OXSR1;FXR1;CDKN1B;RPS6KA5;PPP1R12A;SMAD4;KLHDC10;RAB7A;SDC4;PTPA;DDR1;IGFBP4;DUSP9;UBE2S;SOAT1;NEK4;GNG3;SH3RF1;CCL11;PROX1;PRLR;GRIN2B;DCUN1D5;FGF9;BBC3;MDM2;XIAP;MAPKAPK2;DHX33;DVL1;RAP1A;ITGA2;OSBPL8;WWC1;STK4;DIRAS2;SENP…	regulation of sphingolipid biosynthetic process	2	0.00386042	ORMDL2;PRKAA1	positive regulation of carbohydrate metabolic process	7	0.00189664	IRS1;HMGB1;ARNT;PFKFB3;ENTPD5;PMAIP1;PFKFB2	mRNA cleavage involved in gene silencing by miRNA	2	0.00152137	AGO3;AGO2
regulation of glycogen metabolic process	4	0.000471844	IRS1;HMGB1;PHKG2;GSK3B	positive regulation of gene expression, epigenetic	2	0.00965169	ACTB;SMARCD1	catalytic complex	85	0.000179094	POLD3;DCAF7;CCND2;CSNK2A1;GATAD2A;PHF19;RNF144B;DBT;SF3B3;CDKN1A;PPP2R1B;SPTLC3;CBX5;PSMB5;FBXW8;SYVN1;KLHL21;ERC1;CYBB;CARHSP1;FBXO9;DCAF8;PRPS1;SMARCC1;KDM5C;DYRK2;CDK6;REST;TSEN2;CDKN1B;PPP1R12A;CCNE2;RALY;PTPA;ATXN7L3;CBX2;MAT2A;RPRD2;AGO2;UBE2S;SESN2;DDA1;GNG3;PPP1R11;DCUN1D5;CHD4;GTPBP1;PIK3C2B;PRKAB1;ACTR5;PRPF4B;PCGF3;POLD4;PSME3;KAT7;MAGT1;FBXO27;SF3A1;ZYG11B;MEAF6;UBE2N;MKLN1;GTF2F1;PSM…	regulation of membrane lipid metabolic process	2	0.00386042	ORMDL2;PRKAA1	DNA secondary structure binding	4	0.00199766	HMGB1;XRCC2;RAD18;GEN1	mRNA cleavage involved in gene silencing	2	0.00152137	AGO3;AGO2
response to organic cyclic compound	22	0.00048826	HMGB1;CAV1;HNF4A;TPCN2;BCL2;REST;ERRFI1;LEF1;LDHA;AKAP13;CCR5;STC2;SMAD2;MTHFR;ELK1;BTG2;HEYL;LARP1;EFNA5;GRAMD1B;PEA15;HMGCS1	protein-lysine N-methyltransferase activity	2	0.00996329	SUV39H1;MEN1	Breast cancer	17	0.000185381	CDKN1A;ESR1;PGR;GRB2;CDK6;LEF1;WNT3;FGF9;DVL1;WNT9B;MAPK1;HEYL;AKT2;TP53;E2F2;PIK3R1;BAK1	regulation of ceramide biosynthetic process	2	0.00386042	ORMDL2;PRKAA1	monosaccharide metabolic process	15	0.00209093	IRS1;PDK1;HMGB1;G6PC;H6PD;SLC35B4;GPI;GSK3B;ONECUT1;PPP1R3B;PFKFB3;PGM2L1;PMAIP1;PFKFB2;CYB5R3	Norgestimate	2	0.00152137	ESR1;AR
dendritic tree	17	0.000488263	OPHN1;PALM;ATXN1L;GRM7;FXR1;SYT7;NPTXR;GNG3;ELK1;PRRT2;NFASC;SHISA9;SRCIN1;RBM8A;CBX6;FRMPD4;GSK3B	regulation of protein modification process	10	0.00997993	MYB;ACTB;UBE2N;MEN1;ILK;TAOK1;CD109;TGFBR1;MAP3K9;PPM1F	positive regulation of phosphorus metabolic process	72	0.000186453	EPHB1;CCND2;MAP3K9;IL5;HACD3;HMGB1;CAV1;CDKN1A;DSTYK;MAPK14;PAK3;GPR37L1;PTK6;IL6R;VEGFA;NDST1;OXSR1;CDKN1B;RPS6KA5;PPP1R12A;SMAD4;VAV3;KLHDC10;SDC4;PTPA;DDR1;IGFBP4;DUSP9;NEK4;GNG3;SH3RF1;CCL11;PROX1;PRLR;FGF9;MAPKAPK2;DHX33;DVL1;RAP1A;ITGA2;OSBPL8;WWC1;STK4;DIRAS2;SENP2;CCL22;SYAP1;MAPK1;UBE2N;RPS6KA4;MAP4K2;MAPK8IP3;STK11;ACVR2A;NTSR1;AKT2;TP53;S1PR2;SYK;TGFBR1;CCNT1;PRKAR2A;BMPR2;GPR55;IL23R;…	negative regulation of lipid biosynthetic process	3	0.00386299	ORMDL2;INSIG1;PRKAA1	central nervous system development	36	0.00211249	DCC;NLGN4X;RPS6KA3;HOOK3;BMPR2;BMP7;CRK;GNB4;GRIN2B;SEMA5A;FGFR1;KDM2B;ZNF430;SPATA5;LDLR;BCL2L11;SLC38A2;CTNND1;EZH1;ETS1;GSK3B;EN2;ATXN1L;AFF2;PFKFB3;HMGCS1;BTG2;GATA2;STK4;TYRO3;ACVR1B;ATXN1;SOCS7;RAN;NFIB;MAPK1	positive regulation of intracellular signal transduction	25	0.00156995	MGAT5;P2RX3;HMGB1;CAV1;TLR7;IRAK4;ESR1;AGO3;TAOK1;AR;CD3E;TMEM189-UBE2V1;MINK1;MTDH;LIMS1;BID;REL;SKIL;NTRK3;IL6R;EPHA4;FRS2;PRKAA1;SOX2;IGF1R
regulation of small molecule metabolic process	12	0.000489593	IRS1;HMGB1;CAV1;REST;ARPP19;ZBTB20;IGFBP4;PDPR;SCD;PHKG2;HMGCS1;GSK3B	regulation of phosphorylation	9	0.0101073	ACTB;UBE2N;MEN1;ILK;TAOK1;CD109;TGFBR1;MAP3K9;PPM1F	positive regulation of phosphate metabolic process	72	0.000186453	EPHB1;CCND2;MAP3K9;IL5;HACD3;HMGB1;CAV1;CDKN1A;DSTYK;MAPK14;PAK3;GPR37L1;PTK6;IL6R;VEGFA;NDST1;OXSR1;CDKN1B;RPS6KA5;PPP1R12A;SMAD4;VAV3;KLHDC10;SDC4;PTPA;DDR1;IGFBP4;DUSP9;NEK4;GNG3;SH3RF1;CCL11;PROX1;PRLR;FGF9;MAPKAPK2;DHX33;DVL1;RAP1A;ITGA2;OSBPL8;WWC1;STK4;DIRAS2;SENP2;CCL22;SYAP1;MAPK1;UBE2N;RPS6KA4;MAP4K2;MAPK8IP3;STK11;ACVR2A;NTSR1;AKT2;TP53;S1PR2;SYK;TGFBR1;CCNT1;PRKAR2A;BMPR2;GPR55;IL23R;…	response to epidermal growth factor	3	0.00410053	COL1A1;ZFP36L2;IREB2	purine nucleotide biosynthetic process	14	0.00224266	PDK1;PANK2;ARNT;PDP2;DHTKD1;PANK3;ACSL6;ELOVL5;GPI;PFKFB3;ENTPD5;PGM2L1;SCD;PFKFB2	DNA binding, bending	3	0.00161701	HMGB1;HMGA2;SAP30L
lipid homeostasis	7	0.000500197	MYLIP;CAV1;HNF4A;RALY;ZBTB20;TMEM97;GRAMD1B	muscle cell proliferation	3	0.0102507	MYB;ILK;TGFBR1	positive regulation of protein kinase activity	40	0.000193341	CCND2;MAP3K9;HACD3;HMGB1;CDKN1A;MAPK14;PAK3;IL6R;VEGFA;OXSR1;CDKN1B;SDC4;DUSP9;NEK4;GNG3;PROX1;PRLR;MAPKAPK2;RAP1A;OSBPL8;STK4;DIRAS2;SYAP1;MAPK1;UBE2N;MAP4K2;MAPK8IP3;STK11;S1PR2;SYK;TGFBR1;CCNT1;PRKAR2A;IL23R;SAMD5;EFNA5;TAOK1;NCAPG2;CAB39;SNX9	positive regulation of neuron apoptotic process	3	0.00410053	MCL1;RHOA;CASP2	regulation of B cell proliferation	6	0.00224279	IKZF3;TIRAP;NFATC2;BTK;BCL6;GPR183	regulation of cellular component biogenesis	23	0.00168677	HMGB1;CAV1;PALM;REST;ESR1;SAMD8;PIP4K2C;MYO10;SNAI2;GTF2H1;LIMS1;BID;FER;PIKFYVE;INSIG1;NTRK3;PPM1F;JMY;DDB1;PRKAA1;CNOT6L;TRAF3IP1;OCLN
gene silencing by miRNA	6	0.000503663	FXR1;MYCN;TNRC6B;SMAD2;POLR2E;TNRC6A	positive regulation of actin filament bundle assembly	2	0.0102793	TGFBR1;PPM1F	regulation of multicellular organismal development	113	0.000202699	EPHB1;DDX6;CDH5;ABL2;IL5;MDGA1;ULK2;MYLIP;RAB21;HMGB1;SOD2;CAV1;ESR1;GLG1;NFAM1;FBXW8;MAPK14;PAK3;CYBB;GPR37L1;THBS2;CRTC1;CREB1;PTK6;RFX3;MYOCD;VEGFA;CELF4;ERRFI1;PML;SUFU;CDK6;YWHAZ;REST;NLGN2;NSD2;CDKN1B;PPP1R12A;LEF1;SMAD4;UST;ADD1;DPYSL2;KLF13;RARA;WNT3;PAX2;TOB2;AGO2;CALR;CFL1;SH3RF1;NTN1;CCL11;PROX1;PLCG1;CRB2;S1PR1;FGF9;MDM2;NPR1;ADCY6;BASP1;BHLHE40;CAPRIN1;SRF;DVL1;HES2;SPRED1;RAP1A;FAM2…	posttranscriptional gene silencing by RNA	4	0.00414906	TNRC6B;TNRC6C;AGO1;NCOR2	nuclear inclusion body	3	0.00224409	PABPN1;RAD18;ATXN1	positive regulation of cellular component movement	15	0.00181059	MGAT5;HMGB1;SOD2;CAV1;AGO2;ETS1;CD151;SNAI2;FER;NTRK3;IL6R;RREB1;COL1A1;PPM1F;IGF1R
insulin secretion	9	0.000511091	IRS1;HNF4A;RFX3;REST;SYT7;RAB11B;SMAD2;PTPRN2;EFNA5	lysine N-methyltransferase activity	2	0.0102793	SUV39H1;MEN1	Gastric cancer	17	0.000218361	CDKN1A;GRB2;CDKN1B;CCNE2;LEF1;SMAD4;WNT3;FGF9;DVL1;WNT9B;MAPK1;AKT2;TP53;TGFBR1;E2F2;PIK3R1;BAK1	vacuole organization	5	0.00416885	ULK1;ARF1;ATG13;PIKFYVE;HOOK3	phosphoric ester hydrolase activity	18	0.00229163	PIKFYVE;G6PC;GDE1;PTPN14;PDP2;PSPH;APTX;CYCS;PRKAR2A;PPM1K;PPP1R3B;PFKFB3;MTMR3;CDC14B;PPM1L;PTP4A1;MTMR9;PFKFB2	histone modification	14	0.00184903	ELK4;REST;MTHFR;SUV39H1;JADE2;DNMT3B;SNAI2;SKI;PADI2;HMGA2;SAP30L;PPM1F;DDB1;PRKAA1
sequence-specific DNA binding	25	0.000520639	HNF4A;HOXC8;BCL2;FOXN3;RFX3;MYOCD;REST;LEF1;SMAD4;MYCN;PHF19;POU2F1;GTF2H5;PLAGL2;ZHX3;SATB2;SMAD2;ELK1;MNT;HEYL;HES2;ZNF704;NFIC;EMX2;SMG1	regulation of JNK cascade	3	0.0104037	MEN1;TAOK1;MAP3K9	positive regulation of signal transduction	96	0.000219186	EPHB1;SHB;CSNK2A1;MAP3K9;SH2B3;CREBRF;IL5;RNF165;HACD3;P2RX3;HMGB1;CAV1;PPP2R1B;GJA1;ESR1;NFAM1;DSTYK;F2RL3;MAPK14;CCBE1;PAK3;GPR37L1;SKAP2;PTK6;IL6R;MYOCD;VEGFA;PML;GRB2;YWHAZ;NDST1;NLGN2;SMAD4;VAV3;KLHDC10;PLAGL2;DDR1;LASP1;IGFBP4;WNT3;NRG4;DUSP9;CALR;FKBP8;GNG3;SH3RF1;CCL11;PRLR;CRB2;RASGRF1;FGF9;BBC3;XIAP;NPR1;MAPKAPK2;UNC5B;DHX33;DVL1;SPRED1;RAP1A;OSBPL8;WWC1;STK4;MYORG;DIRAS2;PTPN2;TUBD1;CC…	positive regulation of intracellular protein transport	5	0.00416885	PIK3R2;ATG13;KCNB1;SEC16A;PRKAA1	ribose phosphate biosynthetic process	14	0.00232485	PDK1;PANK2;ARNT;PDP2;DHTKD1;PANK3;ACSL6;ELOVL5;GPI;PFKFB3;ENTPD5;PGM2L1;SCD;PFKFB2	positive regulation of binding	8	0.00197541	HMGB1;CAV1;HMBOX1;STK4;GNL3L;SKI;HMGA2;EPHA4
regulation of cellular protein localization	15	0.000536687	BCL2;CCNE2;IQSEC2;RAB11B;ITGA3;GDI1;PIK3R2;STK11;MIEF1;PTPN14;STX6;TP53INP2;TCAF1;XPO4;GSK3B	regulation of apoptotic process	9	0.0108413	MYB;UBE2Z;PHLDA3;ILK;HYPK;TGFBR1;MAP3K9;PPM1F;JMY	negative regulation of macromolecule biosynthetic process	89	0.000225815	NONO;KCNIP3;GATAD2A;HMGB1;ZNF417;SAMD4A;CAV1;ESR1;CBX5;DKK3;BACE2;NACC1;CREB1;GNL3L;RFX3;MYOCD;VEGFA;KDM5C;CELF4;E2F5;IGF2BP1;ERRFI1;PML;SUFU;HIC2;REST;NSD2;FXR1;CDKN1B;RPS6KA5;LEF1;SMAD4;MDM4;RARA;CBX2;PAX2;TOB2;AGO2;BTG2;CNOT6L;SESN2;CALR;PROX1;FGF9;MDM2;BASP1;BHLHE40;CAPRIN1;SRF;HES2;ZNF268;MNT;UNK;WWC1;HOXC8;CELF1;NFX1;PTPN2;KAT7;SUV39H1;TSHZ2;LIMS1;TFDP2;ZNF154;ZNF485;CC2D1B;HEYL;PEX2;CNBP;T…	intracellular transport	22	0.00418308	TNPO1;STAR;TRIM58;ZDHHC18;PIK3R2;VPS13D;DCTN5;ARL3;ARF1;SRSF7;TUBB;TXNIP;PTPN14;ATG13;PIKFYVE;INSIG1;KCNB1;RBM8A;HOOK3;SEC16A;PRKAA1;TRAF3IP1	positive regulation of RNA metabolic process	56	0.00234046	MYB;MAP3K2;HMGB1;RPS6KA3;ELK4;CREBRF;PNPT1;MAVS;CDK9;BMPR2;PIAS2;IKZF3;HOXB5;SOX7;KDM5A;NFATC2;BMP7;CTCFL;ARNT;POU2F2;ZBED1;ATF7IP;F2RL1;GMEB1;HEYL;MLXIP;REL;VHL;POU2F1;EZH1;ETS1;PTGES2;ONECUT1;ARID5B;ATXN7L3;EN2;HOXC13;IKBKG;BTG2;MICAL2;GATA2;TGFBR1;KLF13;SMARCD1;ACVR1B;ZC3H12D;HMBOX1;RAN;TNRC6B;NFIB;MAPK1;KLF6;NPNT;NR2C2;MYO6;SETD7	positive regulation of catabolic process	13	0.00201251	RNF144B;HMGB1;CAV1;AREL1;PIP4K2C;AGO2;MTDH;SESN3;TRIM65;ZFP36L2;DDB1;PRKAA1;CNOT6L
Hepatocellular carcinoma	8	0.000594154	MET;CDK6;LEF1;SMAD4;SMAD2;ELK1;PIK3R2;GSK3B	negative regulation of cell cycle phase transition	3	0.0108708	MEN1;TAOK1;GEN1	positive regulation of phosphorylation	68	0.000225977	EPHB1;CCND2;MAP3K9;IL5;HACD3;HMGB1;CAV1;CDKN1A;DSTYK;MAPK14;PAK3;GPR37L1;PTK6;IL6R;VEGFA;NDST1;OXSR1;CDKN1B;RPS6KA5;SMAD4;VAV3;KLHDC10;SDC4;DDR1;IGFBP4;DUSP9;NEK4;GNG3;SH3RF1;CCL11;PROX1;PRLR;FGF9;MAPKAPK2;DHX33;DVL1;RAP1A;OSBPL8;WWC1;STK4;DIRAS2;SENP2;CCL22;SYAP1;MAPK1;UBE2N;RPS6KA4;MAP4K2;MAPK8IP3;STK11;ACVR2A;AKT2;TP53;S1PR2;SYK;TGFBR1;CCNT1;PRKAR2A;BMPR2;GPR55;IL23R;SAMD5;EFNA5;TAOK1;NCAPG2;W…	regulation of lipid metabolic process	8	0.00428125	STAR;ADIPOR2;PIK3R2;ORMDL2;ARF1;NCOR2;INSIG1;PRKAA1	pyruvate biosynthetic process	7	0.00236345	ARNT;DHTKD1;GPI;PFKFB3;ENTPD5;PGM2L1;PFKFB2	cell-cell signaling by wnt	14	0.00204446	TMEM237;CAV1;ESR1;AGO3;STK4;WNT9B;AGO2;SNAI2;SKI;HBP1;COL1A1;DDB1;PRKAA1;SOX2
Small cell lung cancer	6	0.000599886	BCL2;CDK6;LAMC1;CCNE2;ITGA3;PIK3R2	pathway-restricted SMAD protein phosphorylation	2	0.0109246	USP15;TGFBR1	positive regulation of cell communication	104	0.000230841	EPHB1;SHB;CSNK2A1;MAP3K9;SH2B3;CREBRF;IL5;RNF165;HACD3;P2RX3;CACNG8;HMGB1;CAV1;PPP2R1B;GJA1;ESR1;VAMP2;NFAM1;DSTYK;F2RL3;MAPK14;CCBE1;PAK3;GPR37L1;CRTC1;SKAP2;CREB1;PTK6;IL6R;MYOCD;VEGFA;PML;GRB2;YWHAZ;NDST1;NLGN2;SMAD4;VAV3;KLHDC10;PLAGL2;DDR1;LASP1;IGFBP4;WNT3;NRG4;DUSP9;CALR;FKBP8;GNG3;SH3RF1;CCL11;PRLR;GRIN2B;CRB2;RASGRF1;FGF9;BBC3;XIAP;NPR1;MAPKAPK2;UNC5B;DHX33;DVL1;SPRED1;RAP1A;ITGA2;OSBPL8…	posttranscriptional gene silencing	4	0.00430351	TNRC6B;TNRC6C;AGO1;NCOR2	negative regulation of protein dephosphorylation	6	0.00244483	ENSA;GSK3B;FKBP1A;GNAI2;PPP1R26;PPP1R14C	phosphotransferase activity, alcohol group as acceptor	20	0.00205784	CAB39;CDKN1A;ETNK1;IRAK4;ESR1;TAOK1;STK4;PRPF4B;MINK1;PIP4K2C;MAPK13;GTF2H1;FER;PIKFYVE;NTRK3;EPHA4;FRS2;GRK3;PRKAA1;IGF1R
negative regulation of cellular protein metabolic process	23	0.000614949	OPHN1;PPP1R1A;CAV1;GAS1;PPP1R11;GMFB;MYOCD;CELF4;FXR1;ERRFI1;LEF1;SMAD4;ARPP19;TNRC6B;SYNCRIP;BTG2;PIK3R2;LARP1;CNOT6L;TNRC6A;SRCIN1;USP7;GSK3B	positive regulation of kinase activity	5	0.0114166	UBE2N;ILK;TAOK1;TGFBR1;MAP3K9	positive regulation of kinase activity	42	0.000237026	CCND2;MAP3K9;HACD3;HMGB1;CDKN1A;DSTYK;MAPK14;PAK3;IL6R;VEGFA;OXSR1;CDKN1B;VAV3;SDC4;DUSP9;NEK4;GNG3;PROX1;PRLR;MAPKAPK2;RAP1A;OSBPL8;STK4;DIRAS2;SYAP1;MAPK1;UBE2N;MAP4K2;MAPK8IP3;STK11;S1PR2;SYK;TGFBR1;CCNT1;PRKAR2A;IL23R;SAMD5;EFNA5;TAOK1;NCAPG2;CAB39;SNX9	negative regulation of protein metabolic process	15	0.00431753	MGAT5;FNIP1;CRY2;TNRC6B;PIK3R2;TNRC6C;AGO1;NTRK3;PPM1F;ZFP36L2;EPHA4;PRKAA1;TRAF3IP1;IREB2;SIAH2	regulation of fatty acid metabolic process	7	0.00253724	IRS1;PDK1;PANK2;LONP2;PDP2;PLIN5;ELOVL5	nuclear-transcribed mRNA catabolic process, deadenylation-dependent decay	5	0.00208263	SAMD4A;DDX6;AGO2;ZFP36L2;CNOT6L
regulation of autophagy	11	0.000619699	HMGB1;SPTLC2;MET;MFSD8;TPCN2;BCL2;PIK3R2;STK11;LARP1;TP53INP2;PIP4K2B	regulation of programmed cell death	9	0.0114757	MYB;UBE2Z;PHLDA3;ILK;HYPK;TGFBR1;MAP3K9;PPM1F;JMY	regulatory region nucleic acid binding	61	0.000237556	NONO;KCNIP3;SPIB;CREBRF;HMGB1;ESR1;GABPB1;MACC1;CREB1;SMARCC1;RFX3;MYOCD;PGR;HIC2;REST;ZNF704;LEF1;SMAD4;SSBP2;MYCN;KLF13;RARA;PAX2;AGO2;NRF1;PROX1;RORA;CHD4;MAZ;BASP1;BHLHE40;SRF;HES2;MNT;NFX1;PCGF3;KAT7;ELK1;SUV39H1;TFDP2;MAFF;CC2D1B;GMEB1;HEYL;MLXIP;CREB3L2;FOSL1;IKZF3;CNBP;TP53;E2F2;ZBTB16;CCNT1;NFIC;SOX7;KDM2B;REL;BACH2;PRDM4;MBNL1;POU2F1	glucocorticoid receptor signaling pathway	2	0.00443483	NR3C1;CRY2	carboxylic acid metabolic process	36	0.00255752	IRS1;PDK1;L2HGDH;ST3GAL1;PANK2;LIAS;CYP27C1;FADS6;LONP2;TARS2;ARNT;PDP2;PSPH;THEM4;DHTKD1;PPM1K;QRSL1;GFPT1;UEVLD;ACSL6;PLIN5;ELOVL5;PTGS1;GGT5;GPI;PTGES2;ZADH2;IDH3A;PFKFB3;ENTPD5;PGM2L1;ACOX1;SCD;PFKFB2;SGPL1;CYB5R3	heme biosynthetic process	3	0.00217887	FXN;COX10;IBA57
protein domain specific binding	18	0.000654155	IRS1;BCL2;ERRFI1;LEF1;QKI;BASP1;SMAD2;ITGA3;DDX6;NFASC;HEYL;STK11;SYK;PAG1;ADAM19;CCDC6;SHISA9;SRCIN1	peptidyl-lysine modification	4	0.0118456	MYB;SUV39H1;MEN1;BRPF1	Platelet activation	15	0.000243576	F2RL3;MAPK14;PPP1R12A;ADCY6;RAP1A;ITGA2;MAPK1;ADCY2;TBXA2R;TLN2;AKT2;SYK;PIK3R1;MYLK3;VAMP8	erythrocyte maturation	2	0.00443483	TRIM58;TAL1	protein phosphorylation	61	0.00256178	IRS1;PDK1;USP15;MAP3K2;HMGB1;RPS6KA3;ST3GAL1;MAVS;FAM83D;CDK9;BMPR2;TRPM7;SIK2;TIRAP;SMG1;EEF2K;MYLK3;BMP7;CRK;DBF4;ADM2;SYAP1;IL6R;GRK3;TESK2;GRIN2B;IRAK4;F2RL1;DSTYK;ATG14;PRKAR2A;FGFR1;SAMD5;PDIK1L;EFNB2;BTK;LIMK1;PEA15;GSK3B;SBK1;CD109;CBL;PABPN1;IKBKG;GPRC5A;GNAI2;TGFBR1;CAB39;PPM1L;MAP3K9;STK4;TYRO3;ACVR1B;GPR183;LAMTOR1;WNK3;MAPK1;NPNT;MLLT1;UHMK1;PIM3	iron-sulfur cluster assembly	3	0.00217887	NDOR1;FXN;IBA57
FoxO signaling pathway	7	0.000692618	IRS1;SOD2;SMAD4;SMAD2;PIK3R2;STK11;USP7	transcription regulatory region sequence-specific DNA binding	6	0.0119849	MYB;ACTB;UBTF;SUV39H1;PKNOX2;ARID5B	homeostatic process	108	0.000248683	SLC31A1;POLD3;ABL2;CD55;CCR5;MYLIP;HACD3;P2RX3;METRNL;RHCG;HMGB1;RPH3AL;SOD2;CAV1;GJA1;ESR1;BSCL2;F2RL3;MAPK14;STC1;SLC4A1;BACE2;ATP2B1;CRTC1;TPT1;PDK3;LIPG;GNL3L;VEGFA;TRA2B;PML;CDK6;PTGES2;CCNE2;SMAD4;ADD1;RAB7A;RALY;KLF13;PAX2;PGAM5;UBE2S;SOAT1;SESN2;CALR;GNG3;ATP6V1A;CCL11;RAB11B;SLC29A1;PRLR;GRIN2B;PLCG1;RORA;S1PR1;XIAP;NPR1;ADCY6;KSR2;PRKAB1;RPS24;SRF;BBS1;SLC22A12;RAP1A;FAM210B;FANCC;POLD4…	regulation of cell differentiation	21	0.00445657	FNIP1;STAR;ZHX3;TRIM58;TNRC6B;TNRC6C;ARF1;TAL1;RHOA;AGO1;TRIM67;SKIL;INSIG1;NTRK3;HOOK3;COL1A1;ZFP36L2;EPHA4;FRS2;MBNL3;AKIRIN1	positive regulation of transcription, DNA-templated	51	0.00281374	MYB;MAP3K2;HMGB1;RPS6KA3;ELK4;CREBRF;MAVS;CDK9;BMPR2;PIAS2;IKZF3;HOXB5;SOX7;KDM5A;NFATC2;BMP7;CTCFL;ARNT;POU2F2;ZBED1;ATF7IP;F2RL1;GMEB1;HEYL;MLXIP;REL;VHL;POU2F1;EZH1;ETS1;PTGES2;ONECUT1;ATXN7L3;EN2;HOXC13;IKBKG;MICAL2;GATA2;TGFBR1;KLF13;SMARCD1;ACVR1B;HMBOX1;RAN;NFIB;MAPK1;KLF6;NPNT;NR2C2;MYO6;SETD7	metallo-sulfur cluster assembly	3	0.00217887	NDOR1;FXN;IBA57
generation of neurons	30	0.0007393	MYLIP;OPHN1;HMGB1;HOXC8;MFSD8;BCL2;CDK6;ANKS1A;REST;RPS6KA5;LEF1;SMAD4;NPTXR;SEMA4G;SATB2;ITGA3;DDX6;GDI1;BTG2;NFASC;HEYL;STK11;CABP4;HES2;EFNA5;EMX2;SDC4;SRCIN1;CBX6;GSK3B	regulation of intracellular signal transduction	10	0.0121571	CASTOR2;PHLDA3;UBE2N;MEN1;BRPF1;ILK;TAOK1;TGFBR1;MAP3K9;JMY	Human T-cell leukemia virus 1 infection	24	0.000259452	POLD3;CCND2;CDKN1A;CRTC1;CREB1;SMAD4;WNT3;CALR;XIAP;ADCY6;SRF;DVL1;POLD4;WNT9B;ELK1;IL2RA;ADCY2;FOSL1;TLN2;AKT2;TP53;TGFBR1;E2F2;PIK3R1	autophagy	9	0.00465247	PIK3R2;VPS13D;MCL1;ULK1;TRIM65;ATG13;PIKFYVE;EPG5;PRKAA1	protein kinase complex	8	0.00284054	IRS1;CDK9;SIK2;PRKAR2A;IKBKG;TGFBR1;CAB39;ACVR1B	toll-like receptor 9 signaling pathway	3	0.00217887	HMGB1;TLR7;IRAK4
posttranscriptional gene silencing by RNA	6	0.000749701	FXR1;MYCN;TNRC6B;SMAD2;POLR2E;TNRC6A	molecular adaptor activity	3	0.0121754	AP2M1;MEN1;STAM	regulation of cell differentiation	102	0.000262729	EPHB1;DDX6;CDH5;ABL2;IL5;ULK2;MYLIP;RAB21;METRNL;HMGB1;SOD2;CAV1;GLG1;NFAM1;FBXW8;MAPK14;PAK3;GPR37L1;CRTC1;TRIOBP;CREB1;PTK6;IL6R;RFX3;MYOCD;VEGFA;ERRFI1;SUFU;CDK6;REST;CDKN1B;PPP1R12A;LEF1;SMAD4;UST;ADD1;DPYSL2;RPS6KA3;KLF13;RARA;WNT3;PAX2;TOB2;CALR;CFL1;SH3RF1;NTN1;PROX1;CRB2;RORA;FGF9;MDM2;ADCY6;BHLHE40;CAPRIN1;SRF;DVL1;HES2;ZNF268;RAP1A;FAM210B;STK4;PTPN2;WNT9B;ITGA3;EEF2K;LIMS1;GDI1;MAFF;SY…	process utilizing autophagic mechanism	9	0.00465247	PIK3R2;VPS13D;MCL1;ULK1;TRIM65;ATG13;PIKFYVE;EPG5;PRKAA1	positive regulation of catabolic process	19	0.00293107	IRS1;HMGB1;PNPT1;TRIM65;NKD1;ARNT;PLIN5;LDLR;BCL2L11;GSK3B;TRIM67;IKBKG;PFKFB3;BTG2;TMEM59;ENTPD5;ZC3H12D;TNRC6B;PFKFB2	stem cell population maintenance	7	0.00217905	WNT9B;DDX6;SKI;HMGA2;HOOK3;ZFP36L2;SOX2
regulation of peptide transport	18	0.00077311	IRS1;HMGB1;PPIA;HNF4A;PPP1R11;RFX3;REST;SYT7;GDI1;PIK3R2;SYK;MIEF1;EFNA5;PTPN14;SRCIN1;TCAF1;XPO4;GSK3B	positive regulation of epithelial to mesenchymal transition involved in endocardial cushion formation	1	0.0122947	TGFBR1	cell cycle arrest	23	0.000266522	CDKN1A;PRR11;UHMK1;PML;CDK6;CDKN1B;MDM4;BTG2;CNOT6L;CALR;MDM2;PRKAB1;ZNF268;RPRM;TFDP2;STK11;AKT2;TP53;TGFBR1;RRAGD;VASH1;CAB39;DHCR24	cellular response to transforming growth factor beta stimulus	6	0.00471105	STAR;NR3C1;RHOA;SKIL;COL1A1;ZFP36L2	lipid metabolic process	48	0.00300846	IRS1;PDK1;ABHD15;PANK2;LIAS;PIKFYVE;CYP27C1;G6PC;FADS6;SMG1;GDE1;LONP2;DGKH;PDP2;CRK;LRP10;THEM4;APOL1;ATG14;FGFR1;PLA2G12A;LRAT;ACSL6;ALG1;PLIN5;LDLR;ELOVL5;PTGS1;GGT5;PTGES2;SDC2;ZADH2;HMGCS1;NAA40;MTMR3;PPM1L;COL4A3BP;LAMTOR1;SOCS7;MTMR9;ACOX1;CDIPT;SCD;RAN;PITPNA;SGPL1;SAMD8;CYB5R3	mammary gland branching involved in pregnancy	2	0.00226323	ESR1;AR
posttranscriptional gene silencing	6	0.000791313	FXR1;MYCN;TNRC6B;SMAD2;POLR2E;TNRC6A	positive regulation of muscle adaptation	1	0.0122947	TRPC3	regulation of cellular protein localization	39	0.000269955	VAMP2;MAPK14;UHMK1;GNL3L;SUFU;YWHAZ;CRIPT;CCNE2;HPS4;IQSEC2;SESN2;RAB11B;CENPQ;BBC3;MDM2;DVL1;RAP1A;YOD1;SAR1B;KAT7;ITGA3;TARDBP;GPSM2;TFDP2;AP2M1;GDI1;UBE2G2;MAPK1;SAR1A;STK11;BCAS3;AKT2;TP53;PIK3R1;MIEF1;STX6;XPO5;WNK3;VAMP8	regulation of hemopoiesis	8	0.00476928	FNIP1;TRIM58;TNRC6B;TNRC6C;TAL1;RHOA;AGO1;ZFP36L2	peptidyl-threonine phosphorylation	8	0.00301258	BMP7;GSK3B;SBK1;TGFBR1;CAB39;ACVR1B;WNK3;MAPK1	prostate glandular acinus morphogenesis	2	0.00226323	ESR1;FRS2
phosphatase binding	8	0.000867193	MET;PPP1R11;BCL2;ARPP19;SMAD2;PIK3R2;SYK;ANK1	DNA catabolic process, exonucleolytic	1	0.0122947	GEN1	Endocrine resistance	13	0.000270877	CDKN1A;ESR1;MAPK14;GRB2;CDKN1B;MDM2;ADCY6;MAPK1;ADCY2;AKT2;TP53;E2F2;PIK3R1	glucose homeostasis	6	0.00491072	STAR;ADIPOR2;CRY2;PIK3R2;KCNB1;PRKAA1	positive regulation of cell migration	21	0.00301578	HMGB1;BMPR2;TIRAP;BMP7;CRK;SEMA3E;IL6R;SEMA5A;F2RL1;FGFR1;ETS1;GPI;FAM107A;ONECUT1;FAM83H;GNAI2;GATA2;TGFBR1;ACVR1B;PTP4A1;MAPK1	prostate epithelial cord arborization involved in prostate glandular acinus morphogenesis	2	0.00226323	ESR1;FRS2
positive regulation of glucose metabolic process	4	0.000900347	IRS1;HMGB1;ARPP19;PHKG2	osteoclast fusion	1	0.0122947	CD109	angiogenesis	38	0.000273338	EPHB1;SHB;CDH5;HMGB1;CAV1;MAPK14;CCBE1;CYBB;THBS2;VEGFA;PML;LEF1;VAV3;AGO2;CCL11;PLCG1;RORA;S1PR1;FGF9;NPR1;PARVA;UNC5B;SRF;SPRED1;STK4;MCAM;EFNA3;PKNOX1;TBXA2R;BCAS3;SYK;TGFBR1;E2F2;HPSE;ADM2;SEMA5A;VASH1;PLXND1	negative regulation of cellular biosynthetic process	19	0.00501184	FNIP1;ZHX3;NR3C1;CRY2;TNRC6B;ORMDL2;TNRC6C;TAL1;AGO1;TXNIP;NCOR2;DOT1L;SKIL;INSIG1;PPM1F;ZFP36L2;PRKAA1;IREB2;SIAH2	carbohydrate catabolic process	10	0.00306158	HMGB1;G6PC;ARNT;DHTKD1;GPI;PPP1R3B;PFKFB3;ENTPD5;PGM2L1;PFKFB2	Fluoxymesterone	2	0.00226323	ESR1;AR
T-helper 1 cell differentiation	3	0.000977349	HMGB1;LEF1;SPN	protein citrullination	1	0.0122947	PADI1	positive regulation of cellular protein metabolic process	94	0.000284401	EPHB1;CCND2;MAP3K9;IL5;PHF19;HACD3;RNF144B;YTHDF1;HMGB1;SAMD4A;CAV1;CDKN1A;DSTYK;FBXW8;MAPK14;UHMK1;CCBE1;PAK3;GPR37L1;TRUB2;PTK6;IL6R;VEGFA;PML;REST;NDST1;OXSR1;FXR1;CDKN1B;RPS6KA5;PPP1R12A;SMAD4;KLHDC10;SDC4;PTPA;DDR1;IGFBP4;DUSP9;UBE2S;NEK4;GNG3;SH3RF1;CCL11;PROX1;PRLR;GRIN2B;DCUN1D5;FGF9;BBC3;MDM2;XIAP;MAPKAPK2;DHX33;DVL1;RAP1A;ITGA2;OSBPL8;WWC1;STK4;DIRAS2;SENP2;PSME3;KAT7;CCL22;SYAP1;EFNA3;…	carbohydrate homeostasis	6	0.00501287	STAR;ADIPOR2;CRY2;PIK3R2;KCNB1;PRKAA1	positive regulation of cellular protein metabolic process	52	0.00311	MYB;MAP3K2;HMGB1;MAVS;CDK9;BMPR2;APOPT1;SOX7;TIRAP;BMP7;ARNT;CRK;DBF4;SYAP1;IL6R;GRIN2B;F2RL1;DSTYK;CYCS;ATG14;PRKAR2A;FGFR1;SAMD5;LDLR;BCL2L11;BCL6;PEA15;FAM107A;GSK3B;FKBP1A;TRIM67;IKBKG;GPRC5A;GNAI2;TRMT10C;CDC14B;TGFBR1;CAB39;RIF1;MAP3K9;STK4;TYRO3;ACVR1B;GPR183;LAMTOR1;PMAIP1;WNK3;MAPK1;TIMM17A;RMND1;NPNT;UHMK1	Gestrinone	2	0.00226323	ESR1;AR
regulation of nuclear-transcribed mRNA catabolic process, deadenylation-dependent decay	3	0.000977349	TNRC6B;BTG2;TNRC6A	histone citrullination	1	0.0122947	PADI1	purine nucleotide binding	110	0.000290268	EPHB1;DDX6;TTF2;CSNK2A1;ABL2;MAP3K9;ULK2;RAB21;P2RX3;ACTR1A;DSTYK;MAPK14;UHMK1;PAK3;ATP2B1;PDK3;GNL3L;PRPS1;PTK6;ACTA1;DYRK2;CDK6;AGK;OXSR1;NME4;RPS6KA5;DDX19B;PDXK;RPS6KA3;RAB7A;PTPA;DDR1;RTKN;MAT2A;MYH14;UBE2S;SOAT1;NEK4;ATP6V1A;MAT1A;RAB11B;GTPBP10;SMC2;RAB5C;CHD4;RAB5B;GTPBP1;NPR1;ADCY6;PIK3C2B;MAPKAPK2;KSR2;CAMK2G;DHX33;RAP1A;SAR1B;STK4;PRPF4B;GNE;DIRAS2;STK35;MCM8;OLA1;TUBD1;EEF2K;TEP1;AK3;…	neuron projection regeneration	3	0.00513859	ULK1;NTRK3;EPHA4	positive regulation of peptidyl-threonine phosphorylation	4	0.00312581	BMP7;CAB39;WNK3;MAPK1	negative regulation of cell differentiation	18	0.00226557	HMGB1;CAV1;MBNL3;REST;DDX6;RAP1GAP2;SNAI2;FSTL3;SKI;SKIL;INSIG1;NTRK3;HOOK3;ZFP36L2;EPHA4;FRS2;TOB2;SOX2
positive regulation of nuclear-transcribed mRNA catabolic process, deadenylation-dependent decay	3	0.000977349	TNRC6B;BTG2;TNRC6A	rDNA heterochromatin	1	0.0122947	SUV39H1	protein domain specific binding	49	0.000295217	DDX6;PLEKHA2;RPH3AL;SHISA9;STAMBP;ABI2;ERC1;PAK3;ATP2B1;TRA2B;ERRFI1;GRB2;YWHAZ;CRIPT;LEF1;SRSF10;RARA;WNT3;FKBP8;ARHGAP31;PROX1;MDM2;BASP1;BHLHE40;SLC22A12;SENP2;FMN1;ZNF106;ITGA3;GPSM2;TFDP2;NFASC;HEYL;STK11;GTF2F1;ACVR2A;MYPN;TP53;SYK;ZBTB16;STX1B;PRKAR2A;ACOX1;SSTR2;HIF1AN;WIPF3;BAK1;ADAM19;PLXND1	intraciliary transport	3	0.00513859	TNPO1;ARL3;TRAF3IP1	positive regulation of interleukin-6 secretion	4	0.00312581	HMGB1;MAVS;F2RL1;LILRA2	negative regulation of TOR signaling	4	0.00238278	TNFAIP8L1;CASTOR2;SESN3;PRKAA1
regulation of polysaccharide metabolic process	4	0.00099176	IRS1;HMGB1;PHKG2;GSK3B	double-stranded DNA exodeoxyribonuclease activity	1	0.0122947	GEN1	epithelial cell maturation	5	0.000296124	CDKN1A;RFX3;PGR;FEM1B;GPAT4	endoplasmic reticulum organization	3	0.00513859	TMEM170A;TOR1AIP2;SEC16A	positive regulation of cellular component movement	22	0.00312741	HMGB1;BMPR2;TIRAP;BMP7;CRK;SEMA3E;IL6R;SEMA5A;F2RL1;FGFR1;BCL6;ETS1;GPI;FAM107A;ONECUT1;FAM83H;GNAI2;GATA2;TGFBR1;ACVR1B;PTP4A1;MAPK1	core promoter binding	4	0.00238278	POU2F1;ELK4;REST;AGO2
catalytic complex	28	0.000993578	IRS1;SF3B3;POGZ;SPTLC2;RALY;PPP1R11;CDK6;REST;PPP1R12A;CCNE2;PHF19;ATXN7L3;GTF2H5;CBX2;RPRD2;GNG3;SATB2;SYNCRIP;PSME3;DCAF7;MEAF6;PIK3R2;PHKG2;CBX5;POLR2E;DIS3L;RBM8A;PNN	Y-form DNA binding	1	0.0122947	MEN1	activation of protein kinase activity	28	0.000296479	MAP3K9;HACD3;HMGB1;MAPK14;PAK3;IL6R;VEGFA;OXSR1;DUSP9;NEK4;GNG3;PRLR;MAPKAPK2;OSBPL8;STK4;MAPK1;UBE2N;MAP4K2;MAPK8IP3;STK11;S1PR2;SYK;TGFBR1;PRKAR2A;IL23R;EFNA5;TAOK1;CAB39	response to nutrient levels	9	0.00532108	FNIP1;STAR;ADIPOR2;ULK1;CASTOR2;KCNB1;COL1A1;PRKAA1;IREB2	regulation of glucose metabolic process	8	0.00319264	IRS1;PDK1;HMGB1;SLC35B4;GSK3B;PPP1R3B;PMAIP1;PFKFB2	covalent chromatin modification	14	0.00239262	ELK4;REST;MTHFR;SUV39H1;JADE2;DNMT3B;SNAI2;SKI;PADI2;HMGA2;SAP30L;PPM1F;DDB1;PRKAA1
regulation of phosphate metabolic process	33	0.00101785	PPP1R1A;IRS1;HMGB1;CAV1;MET;PPP1R11;BCL2;IL6R;GMFB;MYOCD;ERRFI1;RPS6KA5;PPP1R12A;CCNE2;SMAD4;ARPP19;AKAP13;ZBTB20;IGFBP4;PDPR;GNG3;MAPKAPK2;DIRAS2;CCL22;PIK3R2;MAP4K2;STK11;SYK;EFNA5;SDC4;SRCIN1;PEA15;GSK3B	histone methyltransferase activity (H3-K9 specific)	1	0.0122947	SUV39H1	negative regulation of cellular protein metabolic process	65	0.000313639	CSNK2A1;CD55;SERPINA4;PPP1R1A;SAMD4A;CAV1;CTDSPL;CDKN1A;GLG1;GNL3L;PTK6;SMARCC1;ARPP19;MYOCD;VEGFA;CELF4;IGF2BP1;ERRFI1;PML;SUFU;PHACTR2;FXR1;CDKN1B;LEF1;SMAD4;RPS6KA3;PTPA;RARA;PAX2;DUSP9;AGO2;BTG2;CNOT6L;SESN2;CALR;FKBP8;SH3RF1;PPP1R11;CRB2;MDM2;XIAP;CAPRIN1;DVL1;SPRED1;UNK;YOD1;PPP1R14C;CELF1;CST9;SENP2;PTPN2;TARDBP;NXN;UBE2G2;TNFSF14;PSMF1;PRKAR2A;METTL14;LARP1;USP14;A2ML1;TNFAIP8;BAK1;DUSP14…	phosphatidylinositol-3-phosphate biosynthetic process	3	0.00542052	PIK3R2;PIKFYVE;FRS2	single-stranded DNA binding	8	0.00319264	HMGB1;APTX;MCM4;TERF1;RAD51AP1;RAD18;GEN1;NABP1	maintenance of cell number	7	0.00244965	WNT9B;DDX6;SKI;HMGA2;HOOK3;ZFP36L2;SOX2
regulation of phosphorus metabolic process	33	0.00103836	PPP1R1A;IRS1;HMGB1;CAV1;MET;PPP1R11;BCL2;IL6R;GMFB;MYOCD;ERRFI1;RPS6KA5;PPP1R12A;CCNE2;SMAD4;ARPP19;AKAP13;ZBTB20;IGFBP4;PDPR;GNG3;MAPKAPK2;DIRAS2;CCL22;PIK3R2;MAP4K2;STK11;SYK;EFNA5;SDC4;SRCIN1;PEA15;GSK3B	protein-arginine deiminase activity	1	0.0122947	PADI1	Hepatocellular carcinoma	18	0.000316869	CDKN1A;SMARCC1;GRB2;CDK6;LEF1;SMAD4;WNT3;PLCG1;DVL1;WNT9B;ELK1;MAPK1;AKT2;TP53;TGFBR1;E2F2;PIK3R1;BAK1	regulation of megakaryocyte differentiation	3	0.00542052	TNRC6B;TNRC6C;AGO1	sulfur compound biosynthetic process	11	0.00321611	PDK1;ST3GAL1;B3GNT2;LIAS;GSTM3;PDP2;ACSL6;ELOVL5;GGT5;SCD;CHSY1	proximal promoter sequence-specific DNA binding	15	0.00253128	FOXK2;ZBED1;POU2F1;ELK4;REST;ESR1;NR2C2;AR;ETS1;SNAI2;SKIL;HES2;HMGA2;RREB1;MTF1
regulation of kinase activity	20	0.00107517	IRS1;HMGB1;CAV1;IL6R;GMFB;MYOCD;ERRFI1;CCNE2;AKAP13;GNG3;MAPKAPK2;DIRAS2;PIK3R2;MAP4K2;STK11;SYK;EFNA5;SDC4;SRCIN1;PEA15	response to oxygen-containing compound	9	0.0126785	MYB;ACTB;UBTF;CASTOR2;MEN1;TBXA2R;TRPC3;TGFBR1;SMARCD1	negative regulation of translation	15	0.00031754	SAMD4A;CELF4;IGF2BP1;FXR1;RARA;AGO2;BTG2;CNOT6L;SESN2;CALR;CAPRIN1;UNK;CELF1;METTL14;LARP1	response to transforming growth factor beta	6	0.00543712	STAR;NR3C1;RHOA;SKIL;COL1A1;ZFP36L2	regulation of lipid metabolic process	18	0.00321828	IRS1;PDK1;PANK2;LONP2;PDP2;ATG14;PLIN5;LDLR;ELOVL5;HMGCS1;MTMR3;LAMTOR1;SOCS7;MTMR9;ACOX1;SCD;RAN;SAMD8	double-stranded RNA binding	5	0.00264141	HMGB1;TLR7;AGO3;AGO2;MTDH
neuron projection	27	0.0010983	OPHN1;HMGB1;PALM;ATXN1L;GRM7;ANKS1A;FXR1;SYT7;NPTXR;MYH14;RPH3A;GNG3;BASP1;PTPRN2;ITGA3;ELK1;PRRT2;GDI1;NFASC;CABP4;SHISA9;SRCIN1;RBM8A;CBX6;FRMPD4;ANK1;GSK3B	positive regulation of supramolecular fiber organization	3	0.0126869	TGFBR1;PPM1F;JMY	Pancreatic cancer	11	0.000327587	CDKN1A;VEGFA;CDK6;SMAD4;MAPK1;AKT2;TP53;TGFBR1;E2F2;PIK3R1;BAK1	protein kinase complex	4	0.00549449	ULK1;CKS1B;ATG13;PRKAA1	energy derivation by oxidation of organic compounds	14	0.00329217	IRS1;HMGB1;PNPT1;FXN;PANK2;G6PC;COX20;DHTKD1;CYCS;GFPT1;GSK3B;PPP1R3B;IDH3A;PGM2L1	response to ketone	8	0.00267359	ACACA;CAV1;CDKN1A;AR;NDOR1;DNMT3B;NTRK3;PRKAA1
regulation of cell differentiation	33	0.00111304	MYLIP;HMGB1;SOD2;CAV1;CNOT4;BCL2;CDK6;IL6R;RFX3;MYOCD;REST;ERRFI1;PPP1R12A;LEF1;SMAD4;AKAP13;SEMA4G;TNRC6B;TOB2;ZHX3;SMAD2;ITGA3;DDX6;GDI1;HEYL;STK11;SYK;HES2;EFNA5;TNRC6A;SRCIN1;IL2RA;GSK3B	negative regulation of transforming growth factor beta receptor signaling pathway	2	0.0133198	CD109;TGFBR1	chemical homeostasis	72	0.000333207	SLC31A1;ABL2;CD55;CCR5;MYLIP;HACD3;P2RX3;RHCG;HMGB1;RPH3AL;SOD2;CAV1;ESR1;F2RL3;STC1;SLC4A1;BACE2;ATP2B1;TPT1;PDK3;LIPG;VEGFA;TRA2B;PML;SMAD4;RAB7A;RALY;PAX2;SOAT1;SESN2;CALR;GNG3;ATP6V1A;CCL11;RAB11B;SLC29A1;GRIN2B;PLCG1;RORA;S1PR1;XIAP;NPR1;ADCY6;SRF;RAP1A;PTPN2;GRINA;FLG2;MAPK1;ADCY2;COMMD9;STK11;TBXA2R;NTSR1;SLC11A2;SLC24A4;ACACA;PNPLA3;PIK3R1;PRKAR2A;SLC4A4;ACOX1;FITM2;GPR55;FFAR2;PDE6A;EFNA…	regulation of leukocyte adhesion to vascular endothelial cell	2	0.00569402	RHOA;NFAT5	energy reserve metabolic process	7	0.00333248	IRS1;HMGB1;G6PC;GFPT1;GSK3B;PPP1R3B;PGM2L1	negative regulation of cell cycle process	10	0.00272314	E2F6;CTDSPL;CDKN1A;NME6;TAOK1;HMGA2;CBX5;ZFP36L2;CASP2;CNOT6L
heterocycle catabolic process	16	0.00111606	HMGB1;CNOT4;FXR1;LDHA;ZBTB20;TNRC6B;MAPKAPK2;SYNCRIP;DDX6;BTG2;LARP1;CNOT6L;TNRC6A;SMG1;DIS3L;RBM8A	positive regulation of JUN kinase activity	2	0.013679	TAOK1;MAP3K9	negative regulation of RNA metabolic process	81	0.000344359	NONO;KCNIP3;GATAD2A;HMGB1;ZNF417;CAV1;ESR1;CBX5;DKK3;MAPK14;NACC1;CREB1;RFX3;MYOCD;VEGFA;KDM5C;CELF4;E2F5;IGF2BP1;PML;SUFU;HIC2;REST;NSD2;CDKN1B;RPS6KA5;LEF1;SMAD4;MDM4;SRSF10;RARA;CBX2;PAX2;TOB2;BTG2;CALR;PROX1;FGF9;MDM2;BASP1;PKP1;MAPKAPK2;BHLHE40;SRF;HES2;ZNF268;MNT;WWC1;HOXC8;NFX1;PTPN2;KAT7;TARDBP;SUV39H1;TSHZ2;LIMS1;TFDP2;ZNF154;ZNF485;CC2D1B;HEYL;PEX2;CNBP;TP53;MIER3;E2F2;ZBTB16;CCNT1;LARP…	corticosteroid receptor signaling pathway	2	0.00569402	NR3C1;CRY2	toll-like receptor signaling pathway	9	0.0033735	HMGB1;RPS6KA3;TIRAP;IRAK4;F2RL1;BTK;IKBKG;LILRA2;TYRO3	positive regulation of gene expression	38	0.00273569	E2F6;YTHDF1;HMGB1;SAMD4A;CAV1;MICAL2;FOXK2;HMBOX1;ZBED1;POU2F1;ELK4;REST;ESR1;AGO3;NR2C2;AR;CD3E;TMEM189-UBE2V1;AGO2;DNMT3B;ETS1;NFIX;FSTL3;GTF2H1;SKI;LIMS1;REL;INSIG1;NTRK3;PADI2;RNF111;HMGA2;RREB1;COL1A1;PPM1F;PRKAA1;MTF1;SOX2
cellular nitrogen compound catabolic process	16	0.00113555	HMGB1;CNOT4;FXR1;LDHA;ZBTB20;TNRC6B;MAPKAPK2;SYNCRIP;DDX6;BTG2;LARP1;CNOT6L;TNRC6A;SMG1;DIS3L;RBM8A	Adherens junction	2	0.013679	ACTB;TGFBR1	negative regulation of protein metabolic process	68	0.000348539	CSNK2A1;CD55;SERPINA4;PPP1R1A;SF3B3;SAMD4A;CAV1;CTDSPL;CDKN1A;GLG1;BACE2;GNL3L;PTK6;SMARCC1;ARPP19;MYOCD;VEGFA;CELF4;IGF2BP1;ERRFI1;PML;SUFU;PHACTR2;FXR1;CDKN1B;LEF1;SMAD4;MDM4;RPS6KA3;PTPA;RARA;PAX2;DUSP9;AGO2;BTG2;CNOT6L;SESN2;CALR;FKBP8;SH3RF1;PPP1R11;CRB2;MDM2;XIAP;CAPRIN1;DVL1;SPRED1;UNK;YOD1;PPP1R14C;CELF1;CST9;SENP2;PTPN2;TARDBP;NXN;UBE2G2;TNFSF14;PSMF1;PRKAR2A;METTL14;LARP1;USP14;A2ML1;TN…	positive regulation of steroid biosynthetic process	2	0.00569402	STAR;PRKAA1	hydrolase activity, acting on ester bonds	29	0.00342461	PNPT1;PIKFYVE;G6PC;H6PD;DIS3L;GDE1;TARS2;PIWIL1;PTPN14;PDP2;PSPH;IDS;APTX;THEM4;CYCS;PRKAR2A;PPM1K;PLA2G12A;PPP1R3B;RPP25;PFKFB3;MTMR3;CDC14B;PPM1L;GEN1;ZC3H12D;PTP4A1;MTMR9;PFKFB2	protein heterooligomerization	6	0.00273711	CAB39;C1QTNF6;CPSF7;LIMS1;COL1A1;PRKAA1
positive regulation of glycogen metabolic process	3	0.00115114	IRS1;HMGB1;PHKG2	regulation of cell-substrate adhesion	3	0.0137466	MEN1;ILK;PPM1F	cAMP signaling pathway	20	0.000354173	ATP2B1;CREB1;PPP1R12A;VAV3;GRIN2B;NPR1;ADCY6;CAMK2G;RAP1A;MAPK1;CALML3;ADCY2;CREB3L2;CAMK2A;AKT2;PIK3R1;ACOX1;SSTR2;FFAR2;MC2R	regulation of apoptotic process	19	0.00597637	FNIP1;STAR;FFAR4;MTRNR2L1;MCL1;CYCS;RHOA;TXNIP;SKIL;NTRK3;KCNB1;PPM1F;JMY;DDB1;EPHA4;CASP2;FRS2;PRKAA1;SIAH2	regulation of cellular amide metabolic process	18	0.00349325	PDK1;RPS6KA3;RBM4B;PIWIL1;PDP2;EEF1A1;RBM8A;BTG2;CELF1;TRMT10C;DNAJC24;ZC3H12D;QKI;TNRC6B;MAPK1;RMND1;UHMK1;SAMD8	sequence-specific DNA binding	25	0.0027847	E2F6;FOXK2;HMBOX1;GATAD1;ZBED1;POU2F1;ELK4;REST;ESR1;NR2C2;SUV39H1;AR;PKNOX2;ETV3;ETS1;SNAI2;LMNB1;REL;SKIL;HES2;HMGA2;BACH2;RREB1;MTF1;SOX2
glycogen metabolic process	5	0.00116283	PPP1R1A;IRS1;HMGB1;PHKG2;GSK3B	protein phosphorylation	10	0.0138324	USP15;ACTB;UBE2N;MEN1;ILK;TAOK1;CD109;TGFBR1;MAP3K9;PPM1F	generation of neurons	89	0.000356738	TSKU;EPHB1;DDX6;EMX2;ABL2;MDGA1;ULK2;MYLIP;RNF165;RAB21;HMGB1;FBXW8;UHMK1;PAK3;GPR37L1;CRTC1;TRIOBP;CREB1;PTK6;VEGFA;GRB2;SUFU;BLOC1S3;CDK6;YWHAZ;REST;RPS6KA5;LEF1;SMAD4;UST;ANKS1A;DPYSL2;SDC4;DDR1;RARA;WNT3;PAX2;BTG2;CALR;CFL1;SH3RF1;NTN1;PROX1;PLCG1;RORA;RASGRF1;S1PR1;MDM2;ADCY6;BHLHE40;CAPRIN1;UNC5B;SRF;DVL1;HES2;UNK;RAP1A;HOXC8;WNT9B;ITGA3;EEF2K;RACGAP1;GDI1;EFNA3;MAPK1;NFASC;HEYL;RAB10;CREB3…	negative regulation of cell differentiation	11	0.0059811	TAL1;RHOA;SKIL;INSIG1;NTRK3;HOOK3;ZFP36L2;EPHA4;FRS2;MBNL3;AKIRIN1	purine-containing compound biosynthetic process	14	0.00352045	PDK1;PANK2;ARNT;PDP2;DHTKD1;PANK3;ACSL6;ELOVL5;GPI;PFKFB3;ENTPD5;PGM2L1;SCD;PFKFB2	negative regulation of lipid biosynthetic process	4	0.0027975	REST;SNAI2;INSIG1;PRKAA1
T-helper 1 type immune response	4	0.00119381	HMGB1;IL6R;LEF1;SPN	negative regulation of cellular response to transforming growth factor beta stimulus	2	0.0140425	CD109;TGFBR1	regulated exocytosis	54	0.000374549	SURF4;CD55;SERPINA4;HMGB1;RPH3AL;VAMP2;VAMP1;NFAM1;MAPK14;CYBB;STX2;PPIA;SIGLEC14;VEGFA;REST;PHACTR2;PTGES2;PDXK;RAB7A;RAB11B;RAB5C;RAB5B;PKP1;GM2A;DVL1;RAP1A;ADA2;OLA1;MAGT1;PRRT2;FLG2;MAPK1;NFASC;RAB15;RAB10;CAMK2A;COMMD9;TSPAN14;PLAC8;SYK;STX1B;QSOX1;HPSE;PGAM1;CD84;VPS41;RAB11FIP1;MLEC;METTL7A;CD68;CAB39;VAMP8;TMED10;PAFAH1B2	peptide metabolic process	12	0.00625525	TNRC6B;MRPS18B;TNRC6C;RHOA;AGO1;MRPS21;RBM8A;ZFP36L2;EPHA4;QKI;SECISBP2L;IREB2	regulation of erythrocyte differentiation	5	0.00352671	ARNT;ETS1;GATA2;KLF13;ACVR1B	negative regulation of steroid biosynthetic process	3	0.0028484	REST;SNAI2;INSIG1
phosphotransferase activity, alcohol group as acceptor	19	0.00121587	IRS1;MET;CDK6;AGK;RPS6KA5;CCNE2;PDXK;AKAP13;MAPKAPK2;GNE;PIK3R2;MAP4K2;STK11;SYK;PHKG2;SMG1;PIP4K2B;NEK9;GSK3B	Bacterial invasion of epithelial cells	2	0.01441	ACTB;ILK	positive regulation of cell differentiation	62	0.000378536	CDH5;ABL2;IL5;RAB21;METRNL;HMGB1;SOD2;FBXW8;MAPK14;PAK3;CRTC1;TRIOBP;CREB1;PTK6;IL6R;RFX3;MYOCD;VEGFA;REST;LEF1;SMAD4;ADD1;RPS6KA3;RARA;WNT3;PAX2;CALR;NTN1;PROX1;CRB2;CAPRIN1;SRF;DVL1;ZNF268;RAP1A;FAM210B;STK4;ITGA3;EEF2K;LIMS1;GDI1;SYAP1;IL2RA;HEYL;CREB3L2;STK11;TNFSF14;ACVR2A;XRCC2;S1PR2;SYK;TGFBR1;ZBTB16;BMPR2;MYLK3;HIF1AN;IL23R;SEMA5A;EFNA5;PLXNA3;EHD1;PLXND1	protein domain specific binding	11	0.0063762	MCL1;ARF1;RHOA;SRSF7;TUBB;PAG1;DDB1;EPHA4;CASP2;DAZAP2;QKI	Colorectal cancer	7	0.00355809	DCC;CYCS;BCL2L11;GSK3B;TGFBR1;PMAIP1;MAPK1	positive regulation of autophagy	6	0.00286244	HMGB1;PIP4K2C;MTDH;SESN3;TRIM65;PRKAA1
cellular glucan metabolic process	5	0.00123848	PPP1R1A;IRS1;HMGB1;PHKG2;GSK3B	regulation of protein kinase B signaling	3	0.0144803	PHLDA3;ILK;TGFBR1	transcription regulatory region DNA binding	60	0.000386157	NONO;KCNIP3;SPIB;CREBRF;HMGB1;ESR1;GABPB1;MACC1;CREB1;SMARCC1;RFX3;MYOCD;PGR;HIC2;REST;ZNF704;LEF1;SMAD4;SSBP2;MYCN;KLF13;RARA;PAX2;AGO2;NRF1;PROX1;RORA;CHD4;MAZ;BASP1;BHLHE40;SRF;HES2;MNT;NFX1;PCGF3;KAT7;ELK1;SUV39H1;TFDP2;MAFF;CC2D1B;GMEB1;HEYL;MLXIP;CREB3L2;FOSL1;IKZF3;CNBP;TP53;E2F2;ZBTB16;CCNT1;NFIC;SOX7;KDM2B;REL;BACH2;PRDM4;POU2F1	positive regulation of protein serine/threonine kinase activity	7	0.00649956	CKS1B;RHOA;NTRK3;EPHA4;DAZAP2;FRS2;PRKAA1	purine ribonucleotide binding	60	0.00356402	PDK1;MAP3K2;RPS6KA3;PANK2;MCM8;CDK9;BMPR2;PIKFYVE;TRPM7;ATAD3C;XRCC2;RAB27A;TUBD1;SIK2;SMG1;EEF2K;MYLK3;LONP2;TARS2;DGKH;GTPBP10;TTLL12;GRK3;TESK2;IRAK4;DSTYK;ABCB5;PRKAR2A;FGFR1;MCM4;QRSL1;SPATA5;PANK3;ACSL6;PDIK1L;BTK;LIMK1;GSK3B;SBK1;EEF1A1;PFKFB3;GNAI2;TGFBR1;NOL9;RAB36;MAP3K9;RAB33B;STK4;TYRO3;ACVR1B;HSPA4L;WNK3;RAN;RAB5B;MAPK1;PFKFB2;MYO6;UHMK1;CYB5R3;PIM3	response to endogenous stimulus	33	0.00287933	RNF165;ACACA;FAM83G;P2RX3;HMGB1;CAV1;CDKN1A;REST;ESR1;NR2C2;AR;CASTOR2;MAPK13;DNMT3B;ETS1;SNAI2;FSTL3;SESN3;SKI;LIMS1;FER;SKIL;NTRK3;SOCS7;PADI2;RNF111;BTG1;COL1A1;ZFP36L2;EPHA4;FRS2;PRKAA1;IGF1R
glucan metabolic process	5	0.00123848	PPP1R1A;IRS1;HMGB1;PHKG2;GSK3B	actin polymerization-dependent cell motility	1	0.0147359	JMY	Viral carcinogenesis	20	0.000403476	CCND2;CCR5;CDKN1A;CREB1;GRB2;CDK6;YWHAZ;CDKN1B;CCNE2;CHD4;MDM2;MAPKAPK2;SRF;MAPK1;CREB3L2;TP53;SYK;PIK3R1;REL;BAK1	regulation of programmed cell death	19	0.00658021	FNIP1;STAR;FFAR4;MTRNR2L1;MCL1;CYCS;RHOA;TXNIP;SKIL;NTRK3;KCNB1;PPM1F;JMY;DDB1;EPHA4;CASP2;FRS2;PRKAA1;SIAH2	tRNA 5'-end processing	3	0.00358881	USP14;RPP25;TRMT10C	cellular response to endogenous stimulus	29	0.00297247	RNF165;ACACA;FAM83G;P2RX3;CAV1;REST;ESR1;NR2C2;AR;CASTOR2;MAPK13;DNMT3B;SNAI2;FSTL3;SESN3;SKI;LIMS1;FER;SKIL;NTRK3;SOCS7;PADI2;RNF111;COL1A1;ZFP36L2;EPHA4;FRS2;PRKAA1;IGF1R
regulation of glucose metabolic process	6	0.0012512	IRS1;HMGB1;ARPP19;IGFBP4;PHKG2;GSK3B	histone dephosphorylation	1	0.0147359	PPM1F	dentate gyrus development	5	0.00041563	EMX2;CDK6;LEF1;BTG2;PROX1	regulation of cytoskeleton organization	9	0.00662659	ARF1;GNAI1;RHOA;TMOD2;NTRK3;PPM1F;JMY;PRKAA1;TRAF3IP1	activin binding	3	0.00358881	FKBP1A;TGFBR1;ACVR1B	morphogenesis of an epithelium	14	0.00300565	OPHN1;MICAL2;ESR1;STK4;WNT9B;MTHFR;AR;CD151;SNAI2;SKI;RREB1;EPHA4;FRS2;TRAF3IP1
positive regulation of molecular function	33	0.00132713	OPHN1;IRS1;HMGB1;CAV1;MET;BCL2;IL6R;GMFB;MYOCD;REST;ERRFI1;RPS6KA5;PPP1R12A;AKAP13;KCTD7;GNG3;MAPKAPK2;DIRAS2;PSME3;CCL22;GDI1;PIK3R2;MAP4K2;STK11;RABGAP1L;SYK;EFNA5;SDC4;BCL2L13;SRCIN1;TCAF1;PEA15;GSK3B	regulation of hepatic stellate cell activation	1	0.0147359	MYB	ribonucleotide binding	109	0.000434127	EPHB1;DDX6;TTF2;CSNK2A1;ABL2;MAP3K9;ULK2;RAB21;P2RX3;ACTR1A;DSTYK;MAPK14;UHMK1;PAK3;ATP2B1;PDK3;GNL3L;PRPS1;PTK6;ACTA1;DYRK2;CDK6;AGK;OXSR1;NME4;RPS6KA5;DDX19B;PDXK;RPS6KA3;RAB7A;PTPA;DDR1;RTKN;MAT2A;MYH14;UBE2S;SOAT1;NEK4;ATP6V1A;MAT1A;RAB11B;GTPBP10;SMC2;RAB5C;CHD4;RAB5B;GTPBP1;NPR1;ADCY6;PIK3C2B;MAPKAPK2;KSR2;CAMK2G;DHX33;RAP1A;SAR1B;STK4;PRPF4B;IYD;GNE;DIRAS2;STK35;MCM8;OLA1;TUBD1;EEF2K;TEP1;…	protein localization to organelle	13	0.00671102	TNPO1;TOR1AIP2;PIK3R2;VPS13D;ARL3;TXNIP;ATG13;PIKFYVE;INSIG1;HOOK3;COL1A1;SEC16A;PRKAA1	adenyl nucleotide binding	51	0.00381694	PDK1;MAP3K2;RPS6KA3;PANK2;MCM8;CDK9;BMPR2;PIKFYVE;TRPM7;ATAD3C;XRCC2;SIK2;SMG1;EEF2K;MYLK3;LONP2;TARS2;DGKH;TTLL12;GRK3;TESK2;IRAK4;DSTYK;ABCB5;PRKAR2A;FGFR1;MCM4;QRSL1;SPATA5;PANK3;ACSL6;PDIK1L;BTK;LIMK1;GSK3B;SBK1;PFKFB3;TGFBR1;NOL9;MAP3K9;STK4;TYRO3;ACVR1B;HSPA4L;WNK3;MAPK1;PFKFB2;MYO6;UHMK1;CYB5R3;PIM3	miRNA loading onto RISC involved in gene silencing by miRNA	2	0.00314242	AGO3;AGO2
tumor necrosis factor biosynthetic process	3	0.00134324	ERRFI1;MAPKAPK2;SPN	negative regulation of cell-cell adhesion mediated by cadherin	1	0.0147359	PPM1F	mRNA binding	22	0.000440872	DHFR2;SAMD4A;CARHSP1;LUC7L2;CELF4;TRA2B;IGF2BP1;CSTF3;FXR1;RARA;AGO2;CALR;DHX33;UNK;CELF1;TARDBP;SERBP1;TP53;FYTTD1;METTL14;LARP1;XPO5	regulation of cell death	20	0.00679732	FNIP1;STAR;FFAR4;MTRNR2L1;MCL1;CYCS;RHOA;TXNIP;SKIL;NTRK3;KCNB1;PPM1F;JMY;DDB1;LRPAP1;EPHA4;CASP2;FRS2;PRKAA1;SIAH2	double-stranded DNA binding	34	0.00384898	MYB;HMGB1;ELK4;CREBRF;CDK9;IKZF3;HOXB5;HES2;KDM5A;NFATC2;CTCFL;ARNT;POU2F2;ZBED1;APTX;GMEB1;HEYL;KDM2B;MLXIP;REL;POU2F1;TERF1;BCL6;ETS1;RAD51AP1;ARID5B;AFF2;GATA2;KLF13;GEN1;HMBOX1;NFIB;KLF6;NR2C2	cellular response to hyperoxia	2	0.00314242	CAV1;DNMT3B
regulation of tumor necrosis factor biosynthetic process	3	0.00134324	ERRFI1;MAPKAPK2;SPN	regulation of extracellular exosome assembly	1	0.0147359	STAM	Adrenergic signaling in cardiomyocytes	16	0.000446612	PPP1R1A;CACNG8;PPP2R1B;MAPK14;ATP2B1;CREB1;RPS6KA5;TPM3;ADCY6;CAMK2G;MAPK1;CALML3;ADCY2;CREB3L2;CAMK2A;AKT2	positive regulation of autophagy	4	0.00688791	VPS13D;ULK1;TRIM65;PRKAA1	positive regulation of small molecule metabolic process	9	0.00391576	IRS1;HMGB1;ARNT;PLIN5;ELOVL5;PFKFB3;ENTPD5;PMAIP1;PFKFB2	positive regulation of vascular associated smooth muscle cell apoptotic process	2	0.00314242	SOD2;STK4
regulation of transforming growth factor beta receptor signaling pathway	6	0.00137658	CAV1;MYOCD;SMAD4;SMAD2;ITGA3;STK11	dense body	1	0.0147359	ACTB	Hepatitis B	16	0.000446612	CDKN1A;CREB1;GRB2;CDK6;YWHAZ;CDKN1B;CCNE2;SMAD4;ELK1;MAPK1;CREB3L2;AKT2;TP53;TGFBR1;E2F2;PIK3R1	response to amino acid	4	0.00688791	RHOA;CASTOR2;COL1A1;IREB2	purine ribonucleoside triphosphate binding	58	0.00405121	PDK1;MAP3K2;RPS6KA3;PANK2;MCM8;CDK9;BMPR2;PIKFYVE;TRPM7;ATAD3C;XRCC2;RAB27A;TUBD1;SIK2;SMG1;EEF2K;MYLK3;LONP2;TARS2;DGKH;GTPBP10;TTLL12;GRK3;TESK2;IRAK4;DSTYK;ABCB5;FGFR1;MCM4;QRSL1;SPATA5;PANK3;ACSL6;PDIK1L;BTK;LIMK1;GSK3B;SBK1;EEF1A1;PFKFB3;GNAI2;TGFBR1;NOL9;RAB36;MAP3K9;RAB33B;STK4;TYRO3;ACVR1B;HSPA4L;WNK3;RAN;RAB5B;MAPK1;PFKFB2;MYO6;UHMK1;PIM3	GPI-linked ephrin receptor activity	2	0.00314242	NTRK3;EPHA4
aromatic compound catabolic process	16	0.00141631	HMGB1;CNOT4;FXR1;LDHA;ZBTB20;TNRC6B;MAPKAPK2;SYNCRIP;DDX6;BTG2;LARP1;CNOT6L;TNRC6A;SMG1;DIS3L;RBM8A	aromatic amino acid transmembrane transporter activity	1	0.0147359	OCA2	neuron projection development	62	0.000459487	TSKU;EPHB1;ABL2;ULK2;MYLIP;RNF165;RAB21;HMGB1;FBXW8;UHMK1;PAK3;CRTC1;TRIOBP;CREB1;PTK6;VEGFA;GRB2;BLOC1S3;RPS6KA5;SMAD4;UST;DPYSL2;SDC4;DDR1;WNT3;PAX2;BTG2;CFL1;NTN1;PLCG1;RASGRF1;MDM2;ADCY6;CAPRIN1;UNC5B;SRF;DVL1;RAP1A;ITGA3;EEF2K;GDI1;EFNA3;MAPK1;NFASC;RAB10;CREB3L2;CAMK2A;MAPK8IP3;STK11;SLC11A2;MYPN;STX1B;PIK3R1;BMPR2;NYAP2;SEMA5A;EFNA5;PLXNA3;EHD1;NPTXR;PLXND1;RAPH1	regulation of lipid biosynthetic process	5	0.00704382	STAR;ADIPOR2;ORMDL2;INSIG1;PRKAA1	positive regulation of erythrocyte differentiation	4	0.0040809	ARNT;ETS1;GATA2;ACVR1B	Levonorgestrel	2	0.00314242	ESR1;AR
positive regulation of catalytic activity	28	0.00144393	OPHN1;IRS1;HMGB1;CAV1;BCL2;IL6R;GMFB;REST;ERRFI1;PPP1R12A;AKAP13;GNG3;MAPKAPK2;DIRAS2;PSME3;CCL22;GDI1;PIK3R2;MAP4K2;STK11;RABGAP1L;SYK;EFNA5;SDC4;BCL2L13;SRCIN1;PEA15;GSK3B	negative regulation of protein phosphorylation	4	0.0148363	MEN1;ILK;CD109;PPM1F	positive regulation of transferase activity	45	0.000479305	CCND2;PABPN1;MAP3K9;HACD3;HMGB1;CDKN1A;DSTYK;MAPK14;PAK3;IL6R;VEGFA;OXSR1;CDKN1B;VAV3;SDC4;DUSP9;UBE2S;NEK4;GNG3;PROX1;PRLR;DCUN1D5;MAPKAPK2;RAP1A;OSBPL8;STK4;DIRAS2;SYAP1;MAPK1;UBE2N;MAP4K2;MAPK8IP3;STK11;S1PR2;SYK;TGFBR1;CCNT1;PRKAR2A;IL23R;SAMD5;EFNA5;TAOK1;NCAPG2;CAB39;SNX9	definitive hemopoiesis	2	0.00709696	TAL1;ZFP36L2	positive regulation of myeloid leukocyte mediated immunity	4	0.0040809	MAVS;F2RL1;BTK;GATA2	positive regulation of RNA metabolic process	34	0.00314794	E2F6;TCERG1;HMGB1;MICAL2;FOXK2;HMBOX1;ZBED1;POU2F1;ELK4;REST;ESR1;NR2C2;AR;TMEM189-UBE2V1;AGO2;MTDH;ETS1;NFIX;FSTL3;GTF2H1;SKI;REL;INSIG1;PADI2;RNF111;HMGA2;RREB1;COL1A1;JMY;ZFP36L2;PRKAA1;CNOT6L;MTF1;SOX2
neuron differentiation	27	0.00145365	MYLIP;OPHN1;HMGB1;HOXC8;MFSD8;BCL2;ANKS1A;REST;RPS6KA5;SMAD4;NPTXR;SEMA4G;SATB2;ITGA3;DDX6;GDI1;BTG2;NFASC;HEYL;STK11;CABP4;EFNA5;EMX2;SDC4;SRCIN1;CBX6;GSK3B	sequence-specific double-stranded DNA binding	6	0.0152028	MYB;ACTB;UBTF;SUV39H1;PKNOX2;ARID5B	positive regulation of gene expression	111	0.000480694	SPIB;KPNA6;CREBRF;IL5;PHF19;YTHDF1;HMGB1;SAMD4A;CAV1;MICAL2;ESR1;GABPB1;MAPK14;UHMK1;CCBE1;MACC1;CRTC1;TRUB2;CREB1;SMARCC1;ACTA1;RFX3;MYOCD;VEGFA;CELF4;E2F5;TRA2B;PGR;IGF2BP1;REST;PTGES2;FXR1;RPS6KA5;PPP1R12A;LEF1;SMAD4;SSBP2;MYCN;RPS6KA3;PLAGL2;KLF13;RARA;ATXN7L3;WNT3;PAX2;AGO2;NEK4;SESN2;NRF1;CALR;PROX1;RORA;S1PR1;FGF9;MDM2;PKP1;MAPKAPK2;PRKAB1;DHX33;SRF;DVL1;ZNF268;ITGA2;WWC1;SENP2;KAT7;ITGA3;…	ephrin receptor activity	2	0.00709696	NTRK3;EPHA4	FAD binding	4	0.0040809	NQO2;MICAL2;ACOX1;CYB5R3	positive regulation of cell communication	35	0.00317159	MGAT5;RNF165;P2RX3;CACNG8;HMGB1;CAV1;TLR7;IRAK4;ESR1;AGO3;TAOK1;STK4;AR;CD3E;TMEM189-UBE2V1;MINK1;SYT7;MTDH;SKI;LIMS1;BID;REL;SKIL;NTRK3;RNF111;IL6R;GLUL;COL1A1;PAG1;EPHA4;CASP2;FRS2;PRKAA1;SOX2;IGF1R
respiratory system development	8	0.00145705	HMGB1;ATXN1L;MYOCD;ERRFI1;LEF1;BASP1;SMAD2;ITGA3	cellular response to oxygen-containing compound	7	0.0155462	MYB;ACTB;UBTF;CASTOR2;MEN1;TBXA2R;SMARCD1	purine ribonucleotide binding	108	0.000481735	EPHB1;DDX6;TTF2;CSNK2A1;ABL2;MAP3K9;ULK2;RAB21;P2RX3;ACTR1A;DSTYK;MAPK14;UHMK1;PAK3;ATP2B1;PDK3;GNL3L;PRPS1;PTK6;ACTA1;DYRK2;CDK6;AGK;OXSR1;NME4;RPS6KA5;DDX19B;PDXK;RPS6KA3;RAB7A;PTPA;DDR1;RTKN;MAT2A;MYH14;UBE2S;SOAT1;NEK4;ATP6V1A;MAT1A;RAB11B;GTPBP10;SMC2;RAB5C;CHD4;RAB5B;GTPBP1;NPR1;ADCY6;PIK3C2B;MAPKAPK2;KSR2;CAMK2G;DHX33;RAP1A;SAR1B;STK4;PRPF4B;GNE;DIRAS2;STK35;MCM8;OLA1;TUBD1;EEF2K;TEP1;AK3;…	positive regulation of organelle organization	10	0.0072356	VPS13D;ULK1;ARF1;TAL1;RHOA;ATG13;NTRK3;PPM1F;JMY;PRKAA1	nucleoside bisphosphate metabolic process	9	0.00411091	PDK1;PANK2;PDP2;THEM4;PANK3;ACSL6;ELOVL5;HMGCS1;SCD	response to nutrient levels	14	0.00317754	SLC38A2;P2RX3;CDKN1A;WNT9B;MTHFR;CD3E;CASTOR2;DNMT3B;SNAI2;SESN3;GLUL;KCNB1;COL1A1;PRKAA1
cell cycle arrest	9	0.00150187	CNOT4;GAS1;CDK6;MDM4;BTG2;STK11;PRR11;VASH1;CNOT6L	homotypic cell-cell adhesion	2	0.0159217	ACTB;ILK	Vasopressin-regulated water reabsorption	8	0.000486598	DCTN4;VAMP2;CREB1;RAB11B;RAB5C;RAB5B;ADCY6;CREB3L2	tetrapyrrole metabolic process	3	0.00730646	MMAB;COX10;IREB2	ribonucleoside bisphosphate metabolic process	9	0.00411091	PDK1;PANK2;PDP2;THEM4;PANK3;ACSL6;ELOVL5;HMGCS1;SCD	intrinsic apoptotic signaling pathway	10	0.00325205	SOD2;CAV1;CDKN1A;GRINA;SNAI2;BID;SKIL;PPM1F;JMY;CASP2
regulation of cellular response to transforming growth factor beta stimulus	6	0.00151132	CAV1;MYOCD;SMAD4;SMAD2;ITGA3;STK11	regulation of stress fiber assembly	2	0.0159217	TGFBR1;PPM1F	regulation of phosphate metabolic process	100	0.000502057	EPHB1;CCND2;MAP3K9;IL5;HACD3;PPP1R1A;HMGB1;CAV1;CTDSPL;CDKN1A;PPP2R1B;DSTYK;MAPK14;PAK3;GPR37L1;PDK3;PTK6;IL6R;ARPP19;MYOCD;VEGFA;ERRFI1;PML;GRB2;PHACTR2;NDST1;OXSR1;CDKN1B;RPS6KA5;PPP1R12A;CCNE2;SMAD4;VAV3;KLHDC10;SDC4;PTPA;DDR1;IGFBP4;PDPR;DUSP9;NEK4;SESN2;FKBP8;GNG3;SH3RF1;CCL11;PROX1;PRLR;PPP1R11;FGF9;MAPKAPK2;PDE12;DHX33;DVL1;SPRED1;RAP1A;ITGA2;PPP1R14C;OSBPL8;WWC1;STK4;DIRAS2;SENP2;PTPN2;WN…	response to lipid	13	0.00734413	STAR;NR3C1;CRY2;GNAI1;RHOA;TXNIP;NCOR2;INSIG1;NTRK3;COL1A1;ZFP36L2;PRKAA1;IREB2	purine nucleoside bisphosphate metabolic process	9	0.00411091	PDK1;PANK2;PDP2;THEM4;PANK3;ACSL6;ELOVL5;HMGCS1;SCD	regulation of interferon-beta production	4	0.0032591	HMGB1;TLR7;REL;TRAF3IP1
positive regulation of mRNA catabolic process	4	0.00154844	TNRC6B;BTG2;CNOT6L;TNRC6A	response to nutrient	3	0.0162116	CASTOR2;TBXA2R;TRPC3	cell morphogenesis	64	0.000511046	TSKU;EPHB1;ULK2;RNF165;RAB21;PALM;FBXW8;MAPK14;STC1;PAK3;TRIOBP;CREB1;VEGFA;GRB2;LAMC1;RPS6KA5;LEF1;SMAD4;UST;ADD1;DPYSL2;DDR1;WNT3;PAX2;MYH14;CALR;CFL1;NTN1;CCL11;PROX1;PLCG1;PARVA;CAPRIN1;UNC5B;SRF;DVL1;UNK;STK4;EEF2K;LIMS1;GDI1;EFNA3;MAPK1;NFASC;RAB10;MKLN1;CAMK2A;STK11;SLC11A2;MYPN;CABP4;VSIG1;PIK3R1;FITM2;BMPR2;NYAP2;ZNF135;SEMA5A;EFNA5;VWA1;ANTXR1;PLXNA3;PLXND1;RAPH1	membrane invagination	3	0.00765384	ARF1;RHOA;FCHO2	positive regulation of macromolecule biosynthetic process	59	0.0041777	IRS1;MYB;MAP3K2;HMGB1;RPS6KA3;ELK4;CREBRF;MAVS;CDK9;BMPR2;PIAS2;IKZF3;HOXB5;SOX7;TIRAP;KDM5A;NFATC2;BMP7;CTCFL;ARNT;POU2F2;DBF4;ZBED1;ATF7IP;F2RL1;FGFR1;GMEB1;HEYL;MLXIP;REL;VHL;POU2F1;EZH1;ETS1;PTGES2;ONECUT1;ARID5B;ATXN7L3;EN2;HOXC13;IKBKG;MICAL2;TRMT10C;GATA2;TGFBR1;KLF13;SMARCD1;ACVR1B;HMBOX1;RAN;NFIB;MAPK1;KLF6;RMND1;NPNT;NR2C2;MYO6;UHMK1;SETD7	regulation of cell-cell adhesion	12	0.00332815	HMGB1;CAV1;CD3E;MINK1;ETS1;MYO10;SNAI2;FSTL3;IL6R;PPM1F;PAG1;SOX2
positive regulation of mRNA metabolic process	5	0.00157788	CELF4;TNRC6B;BTG2;CNOT6L;TNRC6A	regulation of protein binding	3	0.0162116	ACTB;MEN1;TGFBR1	regulation of phosphorus metabolic process	100	0.000522782	EPHB1;CCND2;MAP3K9;IL5;HACD3;PPP1R1A;HMGB1;CAV1;CTDSPL;CDKN1A;PPP2R1B;DSTYK;MAPK14;PAK3;GPR37L1;PDK3;PTK6;IL6R;ARPP19;MYOCD;VEGFA;ERRFI1;PML;GRB2;PHACTR2;NDST1;OXSR1;CDKN1B;RPS6KA5;PPP1R12A;CCNE2;SMAD4;VAV3;KLHDC10;SDC4;PTPA;DDR1;IGFBP4;PDPR;DUSP9;NEK4;SESN2;FKBP8;GNG3;SH3RF1;CCL11;PROX1;PRLR;PPP1R11;FGF9;MAPKAPK2;PDE12;DHX33;DVL1;SPRED1;RAP1A;ITGA2;PPP1R14C;OSBPL8;WWC1;STK4;DIRAS2;SENP2;PTPN2;WN…	cellular response to glucocorticoid stimulus	3	0.00765384	STAR;NR3C1;ZFP36L2	posttranscriptional regulation of gene expression	21	0.00421975	RPS6KA3;RBM4B;TIRAP;PIWIL1;ATG14;DCP1A;CACNG7;RBM8A;BTG2;CELF1;TRMT10C;DNAJC24;ZC3H12D;QKI;RAN;TNRC6B;MAPK1;YTHDC1;RMND1;UHMK1;NUP214	regulation of catabolic process	21	0.00334515	OPHN1;RNF144B;HMGB1;SF3B3;SAMD4A;CAV1;AREL1;YOD1;PIP4K2C;AGO2;SERBP1;DDA1;MTDH;SESN3;PIKFYVE;TRIM65;ZFP36L2;DDB1;EPHA4;PRKAA1;CNOT6L
positive regulation of autophagy	6	0.00158235	HMGB1;SPTLC2;STK11;LARP1;TP53INP2;PIP4K2B	catalytic complex	8	0.016242	ACTB;ORMDL3;UBE2N;DDA1;MEN1;BRPF1;TGFBR1;SMARCD1	neuron differentiation	81	0.000524158	TSKU;EPHB1;DDX6;EMX2;ABL2;MDGA1;ULK2;MYLIP;RNF165;RAB21;HMGB1;FBXW8;UHMK1;PAK3;GPR37L1;CRTC1;TRIOBP;CREB1;PTK6;VEGFA;GRB2;SUFU;BLOC1S3;YWHAZ;REST;RPS6KA5;SMAD4;UST;ANKS1A;DPYSL2;SDC4;DDR1;RARA;WNT3;PAX2;BTG2;CALR;CFL1;NTN1;PROX1;PLCG1;RORA;RASGRF1;S1PR1;MDM2;ADCY6;CAPRIN1;UNC5B;SRF;DVL1;UNK;RAP1A;HOXC8;WNT9B;ITGA3;EEF2K;GDI1;EFNA3;MAPK1;NFASC;HEYL;RAB10;CREB3L2;CAMK2A;MAPK8IP3;STK11;SLC11A2;MYPN;…	histone deacetylase complex	3	0.00765384	TAL1;NCOR2;SAP30L	purine nucleotide binding	60	0.00425146	PDK1;MAP3K2;RPS6KA3;PANK2;MCM8;CDK9;BMPR2;PIKFYVE;TRPM7;ATAD3C;XRCC2;RAB27A;TUBD1;SIK2;SMG1;EEF2K;MYLK3;LONP2;TARS2;DGKH;GTPBP10;TTLL12;GRK3;TESK2;IRAK4;DSTYK;ABCB5;PRKAR2A;FGFR1;MCM4;QRSL1;SPATA5;PANK3;ACSL6;PDIK1L;BTK;LIMK1;GSK3B;SBK1;EEF1A1;PFKFB3;GNAI2;TGFBR1;NOL9;RAB36;MAP3K9;RAB33B;STK4;TYRO3;ACVR1B;HSPA4L;WNK3;RAN;RAB5B;MAPK1;PFKFB2;MYO6;UHMK1;CYB5R3;PIM3	positive regulation of signaling	35	0.0033532	MGAT5;RNF165;P2RX3;CACNG8;HMGB1;CAV1;TLR7;IRAK4;ESR1;AGO3;TAOK1;STK4;AR;CD3E;TMEM189-UBE2V1;MINK1;SYT7;MTDH;SKI;LIMS1;BID;REL;SKIL;NTRK3;RNF111;IL6R;GLUL;COL1A1;PAG1;EPHA4;CASP2;FRS2;PRKAA1;SOX2;IGF1R
exocytic vesicle	8	0.00165866	SYT7;SLC6A17;RPH3A;RAB11B;RAB5B;PTPRN2;PRRT2;STX6	positive regulation of cytoskeleton organization	3	0.0164109	TGFBR1;PPM1F;JMY	protein kinase complex	13	0.000535235	CCND2;CDKN1A;ERC1;CDK6;CCNE2;SESN2;PRKAB1;ACVR2A;TGFBR1;PHKG2;CCNT1;PRKAR2A;CAB39	positive regulation of apoptotic process	10	0.00773504	FNIP1;MCL1;CYCS;RHOA;TXNIP;SKIL;NTRK3;PPM1F;JMY;CASP2	ribonucleotide binding	60	0.00425146	PDK1;MAP3K2;RPS6KA3;PANK2;MCM8;CDK9;BMPR2;PIKFYVE;TRPM7;ATAD3C;XRCC2;RAB27A;TUBD1;SIK2;SMG1;EEF2K;MYLK3;LONP2;TARS2;DGKH;GTPBP10;TTLL12;GRK3;TESK2;IRAK4;DSTYK;ABCB5;PRKAR2A;FGFR1;MCM4;QRSL1;SPATA5;PANK3;ACSL6;PDIK1L;BTK;LIMK1;GSK3B;SBK1;EEF1A1;PFKFB3;GNAI2;TGFBR1;NOL9;RAB36;MAP3K9;RAB33B;STK4;TYRO3;ACVR1B;HSPA4L;WNK3;RAN;RAB5B;MAPK1;PFKFB2;MYO6;UHMK1;CYB5R3;PIM3	cellular response to lipid	16	0.00335857	ACACA;HMGB1;REST;ESR1;NR2C2;WNT9B;AR;MTDH;DNMT3B;SNAI2;INSIG1;NTRK3;PADI2;COL1A1;ZFP36L2;PRKAA1
positive regulation of carbohydrate metabolic process	5	0.00167244	IRS1;HMGB1;ARPP19;ZBTB20;PHKG2	negative regulation of protein kinase activity	3	0.0164109	MEN1;ILK;PPM1F	protein-containing complex binding	68	0.000556003	EPHB1;ABL2;PHF19;MYBPC1;YTHDF1;HMGB1;SF3B3;CDKN1A;UTRN;LGALS8;CBX5;UHMK1;CCBE1;TRIOBP;SMARCC1;EIF4H;CDKN1B;CRIPT;SMAD4;ADD1;RAB7A;MRRF;DDR1;LASP1;PGAM5;LETMD1;TPM3;MYH14;UBE2S;RPH3A;CALR;CFL1;CRB2;CHD4;MDM2;PKP1;DHX33;UNK;RAP1A;ITGA2;MCM8;OLA1;PTPN2;ITGA3;MTHFR;GPSM2;GNB4;FAM83H;PEX26;PSMF1;ACVR2A;TLN2;SNRPD3;TP53;FSTL3;S1PR2;SYK;TGFBR1;PIK3R1;LETM2;HMGN2;USP14;ADM2;WIPF3;ANTXR1;KLRD1;SNX9;TMED10	positive regulation of protein kinase activity	9	0.00778153	CKS1B;TAL1;RHOA;ATG13;NTRK3;EPHA4;DAZAP2;FRS2;PRKAA1	positive regulation of phosphorylation	37	0.00439947	IRS1;MAP3K2;HMGB1;MAVS;CDK9;BMPR2;TIRAP;BMP7;ARNT;CRK;DBF4;SYAP1;IL6R;F2RL1;DSTYK;ATG14;PRKAR2A;FGFR1;SAMD5;PEA15;IKBKG;PFKFB3;GPRC5A;GNAI2;TGFBR1;CAB39;MAP3K9;ENTPD5;STK4;TYRO3;ACVR1B;GPR183;LAMTOR1;WNK3;MAPK1;PFKFB2;NPNT	regulation of protein kinase activity	19	0.00339924	CAB39;HMGB1;CAV1;CDKN1A;SH3BP5;TAOK1;STK4;TMEM189-UBE2V1;MINK1;GTF2H1;NTRK3;HMGA2;IL6R;PPM1F;DAZAP2;EPHA4;FRS2;PRKAA1;IGF1R
cellular protein localization	34	0.00171685	CAV1;PALM;BCL2;COPZ1;MOAP1;KPNA6;AGK;CCNE2;SRP14;ZDHHC22;IQSEC2;RTKN;UBL4A;RPH3A;RAB11B;RAB5B;ITGA3;GDI1;NFASC;PIK3R2;TSPAN14;STK11;RABGAP1L;SYK;MIEF1;PTPN14;STX6;SMG1;TP53INP2;TCAF1;RBM8A;XPO4;ANK1;GSK3B	apoptotic process	10	0.0165569	MYB;UBE2Z;PHLDA3;ILK;TAOK1;HYPK;TGFBR1;MAP3K9;PPM1F;JMY	neurotrophin receptor binding	4	0.000566471	GRB2;PLCG1;PIK3R1;EFNA5	response to organic cyclic compound	13	0.00781493	STAR;NR3C1;CRY2;GNAI1;RHOA;TXNIP;NCOR2;INSIG1;NTRK3;COL1A1;ZFP36L2;PRKAA1;IREB2	transforming growth factor beta-activated receptor activity	3	0.00441051	BMPR2;TGFBR1;ACVR1B	axon	16	0.00346982	OPHN1;SLC38A2;RAB21;P2RX3;PALM;ADAM22;ORAI2;MINK1;SYT7;NCMAP;NTRK3;GLUL;KCNB1;EPHA4;PRKAA1;IGF1R
positive regulation of vascular smooth muscle cell differentiation	2	0.00179204	SOD2;MYOCD	ephrin receptor signaling pathway	2	0.016702	ACTB;AP2M1	methionine metabolic process	5	0.000568195	MTAP;MAT1A;MRI1;MTHFR;MTHFD1	negative regulation of developmental process	13	0.00781493	TAL1;RHOA;AGO1;SKIL;INSIG1;NTRK3;HOOK3;ZFP36L2;EPHA4;FRS2;MBNL3;TRAF3IP1;AKIRIN1	four-way junction DNA binding	3	0.00441051	HMGB1;XRCC2;GEN1	porphyrin-containing compound biosynthetic process	3	0.0036318	FXN;COX10;IBA57
regulation of glycogen catabolic process	2	0.00179204	HMGB1;PHKG2	response to mycotoxin	1	0.0171711	ACTB	positive regulation of molecular function	101	0.000575397	CCND2;PABPN1;ABL2;MAP3K9;RASGEF1B;IL5;HACD3;HMGB1;CAV1;CDKN1A;ESR1;NFAM1;DSTYK;LRRC55;MAPK14;ERC1;PAK3;CRTC1;GNL3L;IL6R;MYOCD;VEGFA;ACAP2;ERRFI1;PML;REST;OXSR1;CDKN1B;RPS6KA5;PPP1R12A;VAV3;ADD1;SDC4;PTPA;RARA;PGAM5;DUSP9;UBE2S;RGS6;NEK4;GNG3;ARHGAP31;CCL11;PROX1;PRLR;GRIN2B;PLCG1;DCUN1D5;RASGRF1;S1PR1;BBC3;MAPKAPK2;GM2A;DHX33;SRF;RAP1A;ITGA2;OSBPL8;STK4;DIRAS2;PSME3;WNT9B;CCL22;LIMS1;RACGAP1;GDI1…	response to interferon-alpha	2	0.00785108	STAR;IFNAR2	phosphatidylinositol-3,5-bisphosphate phosphatase activity	3	0.00441051	PIKFYVE;MTMR3;MTMR9	negative regulation of steroid metabolic process	3	0.0036318	REST;SNAI2;INSIG1
glandular epithelial cell differentiation	4	0.00182191	HNF4A;CDK6;RFX3;GSK3B	hexose mediated signaling	1	0.0171711	UBTF	endosome	58	0.000584618	EPHB1;SLC31A1;CCR5;RASGEF1B;RAB21;HMGB1;CAV1;STAMBP;CCDC93;GOSR2;BACE2;PAK3;TPT1;LIPG;ACAP2;PML;GRB2;CDKN1B;VPS37B;ANTXR2;CD164;RAB7A;RAB11B;PRLR;RAB5C;S1PR1;RAB5B;PTP4A2;RAP1A;AVL9;SLC48A1;ECE1;AP2M1;MAPK1;OPTN;RAB15;RAB10;LRAT;RAB11FIP4;GAPVD1;AKT2;SLC11A2;RABGAP1L;TGFBR1;VOPP1;RRAGD;SNX20;BET1L;GNPNAT1;STX6;VPS41;RAB11FIP1;ANTXR1;NIPA1;EHD1;CD68;VAMP8;RNF11	nuclear migration	2	0.00785108	TRIM58;HOOK3	peptidyl-threonine modification	8	0.00469831	BMP7;GSK3B;SBK1;TGFBR1;CAB39;ACVR1B;WNK3;MAPK1	mRNA cleavage	3	0.0036318	AGO3;AGO2;CPSF7
peptide hormone secretion	9	0.00182863	IRS1;HNF4A;RFX3;REST;SYT7;RAB11B;SMAD2;PTPRN2;EFNA5	sugar mediated signaling pathway	1	0.0171711	UBTF	negative regulation of nucleobase-containing compound metabolic process	86	0.000599897	NONO;KCNIP3;GATAD2A;HMGB1;ZNF417;CAV1;ESR1;CBX5;DKK3;MAPK14;NACC1;CREB1;GNL3L;RFX3;MYOCD;VEGFA;KDM5C;CELF4;E2F5;IGF2BP1;PML;SUFU;HIC2;REST;NSD2;CDKN1B;RPS6KA5;LEF1;SMAD4;MDM4;SRSF10;RARA;CBX2;PAX2;TOB2;BTG2;CALR;PROX1;FGF9;MDM2;BASP1;PKP1;MAPKAPK2;PDE12;BHLHE40;SRF;HES2;ZNF268;MNT;WWC1;HOXC8;NFX1;PTPN2;KAT7;TARDBP;SUV39H1;TSHZ2;LIMS1;TFDP2;ZNF154;ZNF485;CC2D1B;HEYL;PEX2;CNBP;TP53;MIER3;E2F2;ZBTB1…	positive regulation of protein complex assembly	6	0.00796242	FNIP1;ARF1;TAL1;RHOA;JMY;DDB1	protein dephosphorylation	15	0.00480197	ENSA;PTPN14;PDP2;CYCS;PPM1K;GSK3B;FKBP1A;PPP1R3B;GNAI2;MTMR3;CDC14B;PPP1R26;PPM1L;PTP4A1;PPP1R14C	regulation of protein exit from endoplasmic reticulum	3	0.0036318	YOD1;INSIG1;SEC16A
cellular macromolecule localization	34	0.00188075	CAV1;PALM;BCL2;COPZ1;MOAP1;KPNA6;AGK;CCNE2;SRP14;ZDHHC22;IQSEC2;RTKN;UBL4A;RPH3A;RAB11B;RAB5B;ITGA3;GDI1;NFASC;PIK3R2;TSPAN14;STK11;RABGAP1L;SYK;MIEF1;PTPN14;STX6;SMG1;TP53INP2;TCAF1;RBM8A;XPO4;ANK1;GSK3B	glucose mediated signaling pathway	1	0.0171711	UBTF	transcription regulatory region sequence-specific DNA binding	53	0.000616694	NONO;KCNIP3;SPIB;CREBRF;ESR1;MACC1;CREB1;SMARCC1;RFX3;MYOCD;PGR;HIC2;REST;ZNF704;LEF1;SMAD4;SSBP2;MYCN;KLF13;RARA;PAX2;NRF1;PROX1;RORA;CHD4;MAZ;BHLHE40;SRF;HES2;MNT;NFX1;PCGF3;ELK1;SUV39H1;TFDP2;MAFF;CC2D1B;GMEB1;HEYL;MLXIP;CREB3L2;FOSL1;IKZF3;CNBP;TP53;E2F2;ZBTB16;NFIC;KDM2B;REL;BACH2;PRDM4;POU2F1	positive regulation of programmed cell death	10	0.00808257	FNIP1;MCL1;CYCS;RHOA;TXNIP;SKIL;NTRK3;PPM1F;JMY;CASP2	nuclear export	11	0.00481417	SMG1;PTPN14;PHAX;GSK3B;RBM8A;PABPN1;ATXN1;RAN;YTHDC1;UHMK1;NUP214	response to steroid hormone	12	0.00369155	HMGB1;CAV1;CDKN1A;REST;ESR1;NR2C2;AR;DNMT3B;NTRK3;PADI2;COL1A1;ZFP36L2
regulation of transferase activity	21	0.00188079	IRS1;HMGB1;CAV1;IL6R;GMFB;MYOCD;ERRFI1;CCNE2;AKAP13;GNG3;MAPKAPK2;DIRAS2;PIK3R2;MAP4K2;STK11;SYK;EFNA5;SDC4;SRCIN1;PEA15;GSK3B	fat pad development	1	0.0171711	ARID5B	positive regulation of axonogenesis	11	0.000642961	VEGFA;WNT3;NTN1;SRF;GDI1;STK11;BMPR2;SEMA5A;EFNA5;PLXNA3;PLXND1	kinase binding	11	0.00841552	NR3C1;PIK3R2;CKS1B;RHOA;PTPN14;ATG13;ELP2;IFNAR2;EPHA4;DAZAP2;FRS2	immune effector process	40	0.00485817	MYB;HMGB1;MAVS;RAB27A;TSPAN6;IL10RB;KCMF1;POU2F2;PVR;CRK;CD1D;IRAK4;F2RL1;CFHR5;WIPF3;HPSE;TSPAN14;WIPF2;BTK;BCL6;LIMK1;GPI;PTGES2;EEF1A1;CBL;NCBP3;C1RL;QSOX1;GATA2;CAB39;RIF1;LILRA2;NFASC;GPR183;LAMTOR1;PMAIP1;RAB5B;MAPK1;CLEC12B;CYB5R3	interferon-beta production	4	0.00377002	HMGB1;TLR7;REL;TRAF3IP1
Viral carcinogenesis	8	0.00188176	CDK6;CCNE2;HLA-C;CCR5;MAPKAPK2;PIK3R2;SYK;USP7	extracellular exosome assembly	1	0.0171711	STAM	response to oxygen levels	28	0.000644119	P2RX3;CAV1;CDKN1A;STC1;CYBB;PDK3;CREB1;MYOCD;VEGFA;PML;REST;CDKN1B;SMAD4;MDM4;LDHA;ATP6V1A;SLC29A1;RORA;MDM2;SRF;ITGA2;MTHFR;SUV39H1;EEF2K;SLC11A2;TP53;AHCY;HIF1AN	chromatin binding	9	0.00846408	SETD7;TAL1;NCOR2;NFAT5;SLC30A9;SKIL;SAP30L;PRKAA1;MCMBP	positive regulation of cell motility	21	0.00495777	HMGB1;BMPR2;TIRAP;BMP7;CRK;SEMA3E;IL6R;SEMA5A;F2RL1;FGFR1;ETS1;GPI;FAM107A;ONECUT1;FAM83H;GNAI2;GATA2;TGFBR1;ACVR1B;PTP4A1;MAPK1	anatomical structure formation involved in morphogenesis	24	0.00397783	OPHN1;MYBPC1;HMGB1;CAV1;STK4;WNT9B;MTHFR;AR;AGO2;MTDH;ETS1;SNAI2;NCMAP;SKI;PIKFYVE;SKIL;HES2;SOCS7;HMGA2;GLUL;BTG1;COL1A1;FRS2;SOX2
Proteoglycans in cancer	8	0.00188176	CAV1;MET;PPP1R12A;SMAD2;ELK1;PIK3R2;SDC4;ANK1	parathyroid gland development	1	0.0171711	TGFBR1	signal transduction involved in mitotic G1 DNA damage checkpoint	9	0.000649872	CDKN1A;PML;CDKN1B;MDM4;BTG2;CNOT6L;MDM2;TFDP2;TP53	regulation of cellular ketone metabolic process	4	0.00849734	STAR;ADIPOR2;NCOR2;INSIG1	mitochondrial RNA 3'-end processing	2	0.00499005	PNPT1;TRMT10C	regulation of intracellular signal transduction	36	0.00402399	OPHN1;MGAT5;P2RX3;HMGB1;SOD2;CAV1;TLR7;IRAK4;ESR1;AGO3;TAOK1;TNFAIP8L1;AR;CD3E;TMEM189-UBE2V1;RAP1GAP2;MINK1;PIP4K2C;CASTOR2;GRINA;MTDH;SNAI2;SESN3;LIMS1;BID;REL;SKIL;NTRK3;IL6R;JMY;EPHA4;FRS2;PRKAA1;SOX2;RPF2;IGF1R
protein kinase binding	16	0.00190012	IRS1;CAV1;TPCN2;ERRFI1;PPP1R12A;CCNE2;PITPNM3;MAPKAPK2;PIK3R2;MAP4K2;SYK;PTPN14;SDC4;SRCIN1;NEK9;GSK3B	hepatic stellate cell activation	1	0.0171711	MYB	intracellular signal transduction involved in G1 DNA damage checkpoint	9	0.000649872	CDKN1A;PML;CDKN1B;MDM4;BTG2;CNOT6L;MDM2;TFDP2;TP53	Neurotrophin signaling pathway	4	0.00849734	PIK3R2;RHOA;NTRK3;FRS2	fructose 2,6-bisphosphate metabolic process	2	0.00499005	PFKFB3;PFKFB2	regulation of fat cell differentiation	6	0.00402546	METRNL;STK4;SNAI2;INSIG1;CCDC71L;ZFP36L2
macromolecule catabolic process	27	0.00190468	MYLIP;OPHN1;HMGB1;SF3B3;CAV1;CNOT4;PPP1R11;FXR1;MDM4;TNRC6B;MAPKAPK2;SYNCRIP;PSME3;DDX6;BTG2;RNF216;PHKG2;LARP1;CNOT6L;TNRC6A;SDC4;SMG1;TP53INP2;DIS3L;RBM8A;USP7;GSK3B	positive regulation of spindle checkpoint	1	0.0171711	GEN1	adenyl nucleotide binding	91	0.000655862	EPHB1;DDX6;TTF2;CSNK2A1;ABL2;MAP3K9;ULK2;P2RX3;ACTR1A;DSTYK;MAPK14;UHMK1;PAK3;ATP2B1;PDK3;PRPS1;PTK6;ACTA1;DYRK2;CDK6;AGK;OXSR1;NME4;RPS6KA5;DDX19B;PDXK;RPS6KA3;PTPA;DDR1;MAT2A;MYH14;UBE2S;SOAT1;NEK4;ATP6V1A;MAT1A;SMC2;CHD4;NPR1;ADCY6;PIK3C2B;MAPKAPK2;KSR2;CAMK2G;DHX33;STK4;PRPF4B;GNE;STK35;MCM8;OLA1;EEF2K;TEP1;AK3;UBE2G2;MAPK1;YME1L1;ADCY2;UBE2N;RPS6KA4;MAP4K2;CAMK2A;STK11;ACVR2A;XRCC2;AKT2;GK5;…	heme biosynthetic process	2	0.00863964	COX10;IREB2	fructose-2,6-bisphosphate 2-phosphatase activity	2	0.00499005	PFKFB3;PFKFB2	global genome nucleotide-excision repair	3	0.00406797	GTF2H1;RNF111;DDB1
gene silencing	8	0.00194107	HMGB1;FXR1;MYCN;TNRC6B;SMAD2;POLR2E;CNOT6L;TNRC6A	positive regulation of mitotic cell cycle spindle assembly checkpoint	1	0.0171711	GEN1	organelle fusion	14	0.000664146	VAMP1;GOSR2;STX2;VAV3;RAB7A;CALR;PRRT2;AKT2;STX1B;STX16;MIEF1;STX6;VPS41;BAK1	mitophagy	2	0.00863964	VPS13D;ATG13	L-glutamine transmembrane transporter activity	2	0.00499005	SLC1A5;SLC38A2	prostate gland epithelium morphogenesis	3	0.00406797	ESR1;AR;FRS2
T cell selection	4	0.00197045	BCL2;STK11;SYK;SPN	histone H3-K9 dimethylation	1	0.0171711	SUV39H1	purine ribonucleoside triphosphate binding	104	0.000674455	EPHB1;DDX6;TTF2;CSNK2A1;ABL2;MAP3K9;ULK2;RAB21;P2RX3;ACTR1A;DSTYK;MAPK14;UHMK1;PAK3;ATP2B1;PDK3;GNL3L;PRPS1;PTK6;ACTA1;DYRK2;CDK6;AGK;OXSR1;NME4;RPS6KA5;DDX19B;PDXK;RPS6KA3;RAB7A;PTPA;DDR1;RTKN;MAT2A;MYH14;UBE2S;NEK4;ATP6V1A;MAT1A;RAB11B;GTPBP10;SMC2;RAB5C;CHD4;RAB5B;GTPBP1;NPR1;ADCY6;PIK3C2B;MAPKAPK2;KSR2;CAMK2G;DHX33;RAP1A;SAR1B;STK4;PRPF4B;GNE;DIRAS2;STK35;MCM8;OLA1;TUBD1;EEF2K;TEP1;AK3;UBE2G2…	Golgi to plasma membrane transport	3	0.00875389	ARL3;ARF1;SEC16A	Pathways in cancer	22	0.00504383	DCC;IFNAR1;GSTM3;ARNT;CRK;GNB4;IL6R;CYCS;FGFR1;HEYL;VHL;BCL2L11;ETS1;GSK3B;RALBP1;CBL;IKBKG;GNAI2;TGFBR1;STK4;PMAIP1;MAPK1	regulation of steroid biosynthetic process	5	0.0040729	ACACA;REST;SNAI2;INSIG1;PRKAA1
osteoblast differentiation	8	0.00200185	CDK6;IL6R;REST;LEF1;ZHX3;SATB2;SYNCRIP;TP53INP2	multinuclear osteoclast differentiation	1	0.0171711	CD109	kinase binding	49	0.000701961	CCND2;SH2B3;CAV1;CDKN1A;UTRN;ESR1;MAPK14;ABI2;PITPNM3;ERRFI1;GRB2;SUFU;TTC28;YWHAZ;OXSR1;CDKN1B;PPP1R12A;CCNE2;MYCN;LDHA;RPS6KA3;SDC4;RARA;SH3RF1;PLCG1;NPR1;ADCY6;MAPKAPK2;PRKAB1;DVL1;SPRED1;WWC1;PTPN2;LIMS1;RACGAP1;FAM83H;MAPK1;MAP4K2;SGO1;MAPK8IP3;TP53;SYK;STX1B;CCNT1;PIK3R1;PRKAR2A;PGAM1;SAMD5;CAB39	positive regulation of neuron projection development	6	0.00886201	ARF1;RHOA;TRIM67;SKIL;NTRK3;EPHA4	negative regulation of response to stimulus	51	0.00511527	IRS1;DCC;TMEM170B;NLGN4X;CREBRF;FXN;USP14;PIAS2;TSPAN6;SIK2;NKD1;BMP7;LRIG2;CRK;SEMA3E;THEM4;SEMA5A;F2RL1;PHLDA3;FGFR1;HEYL;VHL;PLIN5;TNFAIP8L1;LDLR;CTNND1;BCL6;ETS1;PEA15;GSK3B;ONECUT1;CD109;FKBP1A;CBL;TRIM67;NXN;PEG10;GPRC5A;GNAI2;GATA2;TGFBR1;RIF1;TRIM72;LILRA2;MTRNR2L1;STK4;TYRO3;SOCS7;CLEC12B;EPS15L1;PIM3	regulation of protein serine/threonine kinase activity	14	0.00408975	CAB39;CAV1;CDKN1A;TAOK1;STK4;TMEM189-UBE2V1;GTF2H1;NTRK3;HMGA2;DAZAP2;EPHA4;FRS2;PRKAA1;IGF1R
neurogenesis	30	0.0020316	MYLIP;OPHN1;HMGB1;HOXC8;MFSD8;BCL2;CDK6;ANKS1A;REST;RPS6KA5;LEF1;SMAD4;NPTXR;SEMA4G;SATB2;ITGA3;DDX6;GDI1;BTG2;NFASC;HEYL;STK11;CABP4;HES2;EFNA5;EMX2;SDC4;SRCIN1;CBX6;GSK3B	postsynaptic cytoskeleton	1	0.0171711	ACTB	Human papillomavirus infection	28	0.000706246	CCND2;CDKN1A;PPP2R1B;THBS2;CREB1;VEGFA;GRB2;CDK6;CDKN1B;LAMC1;CCNE2;WNT3;ATP6V1A;CHD4;MDM2;DVL1;HES2;ITGA2;NFX1;WNT9B;ITGA3;MAPK1;HEYL;CREB3L2;AKT2;TP53;PIK3R1;BAK1	cellular response to corticosteroid stimulus	3	0.00914008	STAR;NR3C1;ZFP36L2	leukocyte mediated immunity	29	0.00514482	HMGB1;MAVS;RAB27A;KCMF1;POU2F2;PVR;CRK;CD1D;IRAK4;F2RL1;HPSE;TSPAN14;BTK;BCL6;GPI;PTGES2;EEF1A1;CBL;C1RL;QSOX1;GATA2;CAB39;RIF1;NFASC;LAMTOR1;RAB5B;MAPK1;CLEC12B;CYB5R3	positive regulation of macromolecule biosynthetic process	36	0.00409573	E2F6;TCERG1;YTHDF1;HMGB1;SAMD4A;MICAL2;FOXK2;HMBOX1;ZBED1;TLR7;POU2F1;ELK4;REST;ESR1;NR2C2;AR;CD3E;TMEM189-UBE2V1;AGO2;MTDH;ETS1;NFIX;FSTL3;GTF2H1;SKI;REL;INSIG1;PADI2;RNF111;HMGA2;RREB1;COL1A1;JMY;PRKAA1;MTF1;SOX2
R-SMAD binding	3	0.00203617	MYOCD;SMAD4;SMAD2	activin receptor complex	1	0.0171711	TGFBR1	negative regulation of cysteine-type endopeptidase activity involved in apoptotic process	11	0.000714446	CSNK2A1;VEGFA;LEF1;RPS6KA3;PAX2;SH3RF1;MDM2;XIAP;TNFSF14;TNFAIP8;DHCR24	regulation of alternative mRNA splicing, via spliceosome	3	0.00914008	SRSF7;RBM8A;MBNL3	positive regulation of endothelial cell proliferation	7	0.00516474	HMGB1;BMPR2;ARNT;SEMA5A;FGFR1;GATA2;TGFBR1	positive regulation of fibroblast apoptotic process	2	0.00415541	BID;BTG1
regulation of multicellular organismal development	35	0.00208096	MYLIP;HMGB1;SOD2;CAV1;HNF4A;CNOT4;BCL2;ATXN1L;CDK6;RFX3;MYOCD;CELF4;REST;ERRFI1;PPP1R12A;LEF1;SMAD4;SEMA4G;TNRC6B;TOB2;BASP1;SMAD2;ITGA3;DDX6;GDI1;HEYL;STK11;SYK;HES2;VASH1;EFNA5;TNRC6A;SRCIN1;IL2RA;GSK3B	chromatin silencing complex	1	0.0171711	SUV39H1	regulation of DNA-templated transcription, initiation	7	0.000717103	HMGB1;ESR1;CREB1;SRF;FOSL1;TP53;ATF7IP	regulation of organelle organization	16	0.00924844	SETD7;VPS13D;ULK1;ARF1;GNAI1;TAL1;RHOA;TMOD2;ATG13;PIKFYVE;INSIG1;NTRK3;PPM1F;JMY;PRKAA1;TRAF3IP1	positive regulation of nucleic acid-templated transcription	52	0.00517813	MYB;MAP3K2;HMGB1;RPS6KA3;ELK4;CREBRF;MAVS;CDK9;BMPR2;PIAS2;IKZF3;HOXB5;SOX7;KDM5A;NFATC2;BMP7;CTCFL;ARNT;POU2F2;ZBED1;ATF7IP;F2RL1;GMEB1;HEYL;MLXIP;REL;VHL;POU2F1;EZH1;ETS1;PTGES2;ONECUT1;ARID5B;ATXN7L3;EN2;HOXC13;IKBKG;MICAL2;GATA2;TGFBR1;KLF13;SMARCD1;ACVR1B;HMBOX1;RAN;NFIB;MAPK1;KLF6;NPNT;NR2C2;MYO6;SETD7	RNA secondary structure unwinding	2	0.00415541	AGO3;AGO2
hippocampus development	5	0.00209271	CDK6;LEF1;BTG2;EMX2;GSK3B	H3 histone acetyltransferase complex	1	0.0171711	BRPF1	organelle membrane fusion	12	0.000722216	VAMP1;GOSR2;STX2;VAV3;RAB7A;CALR;PRRT2;AKT2;STX1B;STX16;STX6;VPS41	gene silencing by RNA	4	0.00925637	TNRC6B;TNRC6C;AGO1;NCOR2	establishment of RNA localization	11	0.00519866	PNPT1;SMG1;PHAX;TERF1;RBM8A;NCBP3;PABPN1;QKI;RAN;YTHDC1;NUP214	early phagosome	2	0.00415541	TLR7;SYT7
Cellular senescence	7	0.00211288	CDK6;CCNE2;HLA-C;MAPKAPK2;SMAD2;CALML3;PIK3R2	MOZ/MORF histone acetyltransferase complex	1	0.0171711	BRPF1	positive regulation of endothelial cell development	3	0.000729905	CDH5;ADD1;S1PR2	protein localization to nucleus	6	0.00933815	TNPO1;TOR1AIP2;PIK3R2;TXNIP;PIKFYVE;COL1A1	positive regulation of transferase activity	25	0.00520845	IRS1;MAP3K2;HMGB1;TIRAP;CRK;DBF4;SYAP1;IL6R;DSTYK;ATG14;PRKAR2A;FGFR1;SAMD5;PEA15;PABPN1;IKBKG;GPRC5A;CDC14B;TGFBR1;CAB39;MAP3K9;STK4;HMBOX1;MAPK1;PFKFB2	Mitotane	2	0.00415541	ESR1;AR
transcription factor binding	16	0.00212244	HMGB1;HNF4A;BCL2;MYOCD;REST;LEF1;SMAD4;TOB2;SMAD2;ELK1;HEYL;HES2;CBX5;USP7;GSK3B;LCOR	transforming growth factor beta receptor activity, type I	1	0.0171711	TGFBR1	positive regulation of establishment of endothelial barrier	3	0.000729905	CDH5;ADD1;S1PR2	response to corticosterone	2	0.00946215	STAR;NTRK3	positive regulation of RNA biosynthetic process	52	0.00524219	MYB;MAP3K2;HMGB1;RPS6KA3;ELK4;CREBRF;MAVS;CDK9;BMPR2;PIAS2;IKZF3;HOXB5;SOX7;KDM5A;NFATC2;BMP7;CTCFL;ARNT;POU2F2;ZBED1;ATF7IP;F2RL1;GMEB1;HEYL;MLXIP;REL;VHL;POU2F1;EZH1;ETS1;PTGES2;ONECUT1;ARID5B;ATXN7L3;EN2;HOXC13;IKBKG;MICAL2;GATA2;TGFBR1;KLF13;SMARCD1;ACVR1B;HMBOX1;RAN;NFIB;MAPK1;KLF6;NPNT;NR2C2;MYO6;SETD7	Danazol	2	0.00415541	ESR1;AR
positive regulation of gene expression	35	0.00213638	HMGB1;CAV1;HNF4A;MET;RFX3;MYOCD;CELF4;REST;KPNA6;FXR1;RPS6KA5;PPP1R12A;LEF1;SMAD4;MYCN;PHF19;ATXN7L3;POU2F1;PLAGL2;TNRC6B;MAPKAPK2;SATB2;SMAD2;SYNCRIP;ITGA3;ELK1;HEYL;PIK3R2;LARP1;POLR2E;NFIC;ADAM19;TNRC6A;TP53INP2;GSK3B	cytochrome-b5 reductase activity, acting on NAD(P)H	1	0.0171711	CYB5R3	3-hydroxyacyl-CoA dehydratase activity	3	0.000729905	HACD3;HACD4;HACD2	regulation of axon regeneration	2	0.00946215	NTRK3;EPHA4	regulation of protein modification process	57	0.00527582	MYB;MAP3K2;HMGB1;MAVS;FAM83D;CDK9;BMPR2;TIRAP;KDM5A;EEF2K;BMP7;CTCFL;ENSA;ARNT;CRK;DBF4;SYAP1;IL6R;F2RL1;DSTYK;ATG14;PRKAR2A;FGFR1;SAMD5;UBXN2A;BCL6;LIMK1;PEA15;FAM107A;GSK3B;CD109;FKBP1A;PPP1R3B;CBL;NXN;IKBKG;GPRC5A;GNAI2;GATA2;CDC14B;TGFBR1;PPP1R26;CAB39;RIF1;TMEM59;MAP3K9;STK4;TYRO3;ACVR1B;GPR183;LAMTOR1;WNK3;MAPK1;PPP1R14C;NPNT;MLLT1;SETD7	regulation of cell differentiation	34	0.00420122	RAB21;METRNL;HMGB1;SOD2;CAV1;MBNL3;REST;AGO3;STK4;WNT9B;AR;DDX6;RAP1GAP2;DNMT3B;ETS1;SNAI2;FSTL3;SKI;LIMS1;SKIL;HES2;INSIG1;NTRK3;IL6R;BTG1;RREB1;CCDC71L;HOOK3;COL1A1;ZFP36L2;EPHA4;FRS2;TOB2;SOX2
regulation of cell growth	12	0.00215564	HNF4A;BCL2;MYOCD;LEF1;SMAD4;SEMA4G;IGFBP4;TMEM97;GDI1;STK11;EFNA5;GSK3B	5'-flap endonuclease activity	1	0.0171711	GEN1	positive regulation of protein modification process	74	0.000733178	EPHB1;CCND2;MAP3K9;IL5;PHF19;HACD3;HMGB1;CAV1;CDKN1A;DSTYK;MAPK14;PAK3;GPR37L1;PTK6;IL6R;VEGFA;NDST1;OXSR1;CDKN1B;RPS6KA5;PPP1R12A;SMAD4;KLHDC10;SDC4;PTPA;DDR1;IGFBP4;DUSP9;UBE2S;NEK4;GNG3;SH3RF1;CCL11;PROX1;PRLR;DCUN1D5;FGF9;XIAP;MAPKAPK2;DHX33;DVL1;RAP1A;OSBPL8;WWC1;STK4;DIRAS2;SENP2;KAT7;CCL22;SYAP1;MAPK1;UBE2N;RPS6KA4;MAP4K2;MAPK8IP3;STK11;ACVR2A;AKT2;TP53;S1PR2;SYK;TGFBR1;CCNT1;PRKAR2A;BMPR2…	cellular amide metabolic process	14	0.00949452	TNRC6B;ORMDL2;MRPS18B;TNRC6C;RHOA;AGO1;MRPS21;RBM8A;ZFP36L2;EPHA4;PRKAA1;QKI;SECISBP2L;IREB2	regulation of nuclear cell cycle DNA replication	3	0.00533706	FGFR1;TERF1;BCL6	tissue morphogenesis	16	0.00420306	OPHN1;MYBPC1;MICAL2;ESR1;STK4;WNT9B;MTHFR;AR;CD151;SNAI2;SKI;HMGA2;RREB1;EPHA4;FRS2;TRAF3IP1
regulation of protein kinase activity	18	0.00215674	HMGB1;CAV1;IL6R;GMFB;MYOCD;ERRFI1;CCNE2;AKAP13;GNG3;MAPKAPK2;DIRAS2;MAP4K2;STK11;SYK;EFNA5;SDC4;SRCIN1;PEA15	type II transforming growth factor beta receptor binding	1	0.0171711	TGFBR1	signal transduction involved in mitotic cell cycle checkpoint	9	0.000740539	CDKN1A;PML;CDKN1B;MDM4;BTG2;CNOT6L;MDM2;TFDP2;TP53	Platelet activation	4	0.00951887	PIK3R2;GNAI1;RHOA;COL1A1	regulation of leukocyte mediated immunity	11	0.0053998	HMGB1;MAVS;PVR;CRK;CD1D;F2RL1;BTK;BCL6;GATA2;RIF1;CLEC12B	positive regulation of signal transduction	32	0.00422393	MGAT5;RNF165;P2RX3;HMGB1;CAV1;TLR7;IRAK4;ESR1;AGO3;TAOK1;STK4;AR;CD3E;TMEM189-UBE2V1;MINK1;MTDH;SKI;LIMS1;BID;REL;SKIL;NTRK3;RNF111;IL6R;COL1A1;PAG1;EPHA4;CASP2;FRS2;PRKAA1;SOX2;IGF1R
regulation of carbohydrate metabolic process	7	0.00218855	IRS1;HMGB1;ARPP19;ZBTB20;IGFBP4;PHKG2;GSK3B	ubiquitination-like modification-dependent protein binding	1	0.0171711	USP15	signal transduction involved in mitotic DNA damage checkpoint	9	0.000740539	CDKN1A;PML;CDKN1B;MDM4;BTG2;CNOT6L;MDM2;TFDP2;TP53	response to activity	3	0.0095361	STAR;PRKAA1;IREB2	positive regulation of cell activation	15	0.00540049	MYB;HMGB1;TIRAP;NFATC2;IL6R;CD1D;F2RL1;TMIGD2;EFNB2;BTK;BCL6;GATA2;RIF1;LILRA2;GPR183	kinase regulator activity	8	0.00425056	CAB39;HMGB1;CDKN1A;SH3BP5;TAOK1;STK4;SOCS7;DAZAP2
nuclear-transcribed mRNA catabolic process	8	0.00219323	CNOT4;TNRC6B;DDX6;BTG2;CNOT6L;TNRC6A;SMG1;RBM8A	ubiquitin-dependent protein binding	1	0.0171711	USP15	signal transduction involved in mitotic DNA integrity checkpoint	9	0.000740539	CDKN1A;PML;CDKN1B;MDM4;BTG2;CNOT6L;MDM2;TFDP2;TP53	response to glucose	5	0.0095944	STAR;RHOA;TXNIP;KCNB1;PRKAA1	positive regulation of protein binding	7	0.00547815	TIRAP;SYAP1;GSK3B;FKBP1A;ADD2;STK4;RAN	regulation of kinase activity	20	0.00431164	CAB39;HMGB1;CAV1;CDKN1A;SH3BP5;TAOK1;STK4;TMEM189-UBE2V1;MINK1;GTF2H1;NTRK3;SOCS7;HMGA2;IL6R;PPM1F;DAZAP2;EPHA4;FRS2;PRKAA1;IGF1R
proximal promoter sequence-specific DNA binding	14	0.00221748	HNF4A;RFX3;MYOCD;REST;LEF1;SMAD4;MYCN;POU2F1;SATB2;SMAD2;ELK1;HEYL;HES2;NFIC	single-stranded DNA 3'-5' exodeoxyribonuclease activity	1	0.0171711	GEN1	Endometrial cancer	9	0.000740539	CDKN1A;GRB2;LEF1;ELK1;MAPK1;AKT2;TP53;PIK3R1;BAK1	ciliary transition zone	3	0.009942	ARL3;TRAF3IP1;C5orf30	negative regulation of neuron death	11	0.00560704	XRCC2;KDM2B;REL;GPI;GSK3B;EN2;CBL;IKBKG;BTG2;BHLHB9;TYRO3	positive regulation of protein metabolic process	33	0.00441896	CAB39;RNF144B;YTHDF1;HMGB1;SAMD4A;CAV1;CDKN1A;AREL1;TLR7;REST;TAOK1;STK4;AR;CD3E;TMEM189-UBE2V1;MINK1;DNMT3B;SPRTN;SNAI2;BID;NTRK3;RNF111;HMGA2;IL6R;PPM1F;DDB1;DAZAP2;EPHA4;FRS2;PRKAA1;SOX2;IGF1R;CDK2AP1
enzyme regulator activity	22	0.00221938	OPHN1;PPP1R1A;HMGB1;CAV1;PPP1R11;GMFB;GRM7;ERRFI1;PPP1R12A;CCNE2;LEF1;ARPP19;RTKN;PSME3;GDI1;CALML3;PIK3R2;STK11;RABGAP1L;BAG1;EFNA5;BCL2L13	regulation of DNA-binding transcription factor activity	4	0.017404	UBE2N;MEN1;JMY;ARID5B	embryo development ending in birth or egg hatching	44	0.000767269	TM4SF1;FBXW8;VEGFA;CELF4;GRB2;SUFU;NDST1;LEF1;SMAD4;ADD1;SDC4;RARA;PAX2;FKBP8;CFL1;PROX1;PLCG1;CRB2;FGF9;RRP7A;BHLHE40;SRF;DVL1;HES2;STK4;CELF1;SENP2;WNT9B;MTHFR;ECE1;MAFF;MAPK1;ZFP14;FOSL1;ACVR2A;XRCC2;MTHFD1;RPL7L1;TGFBR1;BMPR2;VASH1;KDM2B;NCAPG2;MBNL1	cellular response to organic cyclic compound	9	0.0101951	STAR;NR3C1;CRY2;GNAI1;RHOA;NCOR2;INSIG1;COL1A1;ZFP36L2	glycogen metabolic process	6	0.00567167	IRS1;HMGB1;G6PC;GSK3B;PPP1R3B;PGM2L1	positive regulation of cellular catabolic process	11	0.00455588	RNF144B;HMGB1;CAV1;PIP4K2C;AGO2;MTDH;SESN3;TRIM65;ZFP36L2;PRKAA1;CNOT6L
regulation of cell proliferation	30	0.00230419	IRS1;HMGB1;SOD2;CAV1;HNF4A;BCL2;ATXN1L;CDK6;IL6R;MYOCD;REST;ERRFI1;LAMC1;CCNE2;LEF1;SMAD4;MDM4;TOB2;SMAD2;MNT;LDOC1;BTG2;STK11;SYK;VASH1;CNOT6L;PTPN14;SDC4;SPN;IL2RA	histone acetyltransferase complex	2	0.0174983	ACTB;BRPF1	coronary vasculature development	8	0.000771167	MYOCD;VEGFA;SUFU;NDST1;SRF;SPRED1;TGFBR1;PLXND1	circadian rhythm	5	0.0104263	STAR;CRY2;NTRK3;PRKAA1;SIAH2	protein N-linked glycosylation	6	0.00567167	ST3GAL1;UGGT1;GFPT1;ALG1;ENTPD5;ASGR2	protein trimerization	4	0.00463411	P2RX3;C1QTNF6;SKI;COL1A1
positive regulation of activated T cell proliferation	3	0.00230812	HMGB1;IL6R;IL2RA	positive regulation of exocytosis	2	0.0179025	RAB15;STAM	SNARE complex	8	0.000771167	VAMP2;GOSR2;STX2;STX1B;STX16;BET1L;STX6;VAMP8	regulation of neuron apoptotic process	5	0.0106417	STAR;MCL1;RHOA;KCNB1;CASP2	nucleoside diphosphate phosphorylation	7	0.00580559	ARNT;DHTKD1;GPI;PFKFB3;ENTPD5;PGM2L1;PFKFB2	cell surface receptor signaling pathway involved in cell-cell signaling	15	0.00469142	P2RX3;TMEM237;CAV1;ESR1;AGO3;STK4;WNT9B;AGO2;SNAI2;SKI;HBP1;COL1A1;DDB1;PRKAA1;SOX2
secondary palate development	3	0.00230812	LEF1;SMAD4;SMAD2	regulation of cell cycle	7	0.0180028	ACTB;MEN1;ILK;TAOK1;TGFBR1;GEN1;JMY	Cysteine and methionine metabolism	8	0.000771167	MTAP;LDHA;MAT2A;MAT1A;MRI1;AHCYL2;AHCY;CBS	response to hexose	5	0.0106417	STAR;RHOA;TXNIP;KCNB1;PRKAA1	myeloid cell homeostasis	9	0.00595923	HMGB1;ARNT;BCL2L11;BCL6;ETS1;GPI;GATA2;KLF13;ACVR1B	regulation of multicellular organismal development	37	0.00472453	RAB21;HMGB1;SOD2;CAV1;REST;ESR1;AGO3;STK4;WNT9B;AR;CD3E;DDX6;RAP1GAP2;AGO2;MTDH;DNMT3B;ETS1;SNAI2;NCMAP;FSTL3;SKI;SKIL;HES2;NTRK3;HMGA2;GLUL;BTG1;RREB1;HOOK3;COL1A1;ZFP36L2;EPHA4;FRS2;PRKAA1;TRAF3IP1;TOB2;SOX2
protein dephosphorylation	10	0.00231138	PPP1R1A;PPP1R11;BCL2;PPP1R12A;ARPP19;PDPR;PTPRN2;STK11;PTPN14;GSK3B	regulation of cell death	9	0.0180042	MYB;UBE2Z;PHLDA3;ILK;HYPK;TGFBR1;MAP3K9;PPM1F;JMY	neurogenesis	92	0.000788262	TSKU;EPHB1;DDX6;EMX2;ABL2;MDGA1;ULK2;MYLIP;RNF165;RAB21;HMGB1;FBXW8;UHMK1;BACE2;PAK3;GPR37L1;CRTC1;TRIOBP;CREB1;PTK6;VEGFA;GRB2;SUFU;BLOC1S3;CDK6;YWHAZ;REST;RPS6KA5;LEF1;SMAD4;UST;ANKS1A;DPYSL2;SDC4;DDR1;RARA;WNT3;PAX2;BTG2;CALR;CFL1;SH3RF1;NTN1;PROX1;PLCG1;RORA;RASGRF1;S1PR1;MDM2;ADCY6;BHLHE40;CAPRIN1;UNC5B;SRF;DVL1;HES2;UNK;RAP1A;HOXC8;WNT9B;ITGA3;EEF2K;RACGAP1;GDI1;EFNA3;MAPK1;NFASC;HEYL;RAB10…	cellular response to retinoic acid	3	0.0107836	NTRK3;COL1A1;IREB2	thioester biosynthetic process	5	0.00606546	PDK1;PDP2;ACSL6;ELOVL5;SCD	positive regulation of nucleic acid-templated transcription	32	0.00472826	E2F6;TCERG1;HMGB1;MICAL2;FOXK2;HMBOX1;ZBED1;POU2F1;ELK4;REST;ESR1;NR2C2;AR;TMEM189-UBE2V1;AGO2;MTDH;ETS1;NFIX;FSTL3;GTF2H1;SKI;REL;INSIG1;PADI2;RNF111;HMGA2;RREB1;COL1A1;JMY;PRKAA1;MTF1;SOX2
axon terminus	6	0.00234156	OPHN1;SYT7;PTPRN2;ELK1;PRRT2;CABP4	positive regulation of transferase activity	5	0.01862	UBE2N;ILK;TAOK1;TGFBR1;MAP3K9	negative regulation of cellular biosynthetic process	89	0.000809143	NONO;KCNIP3;GATAD2A;HMGB1;ZNF417;SAMD4A;CAV1;ESR1;CBX5;DKK3;BACE2;NACC1;CREB1;GNL3L;RFX3;MYOCD;VEGFA;KDM5C;CELF4;E2F5;IGF2BP1;ERRFI1;PML;SUFU;HIC2;REST;NSD2;FXR1;CDKN1B;RPS6KA5;LEF1;SMAD4;MDM4;RARA;CBX2;PAX2;TOB2;AGO2;BTG2;CNOT6L;SESN2;CALR;PROX1;FGF9;MDM2;BASP1;BHLHE40;CAPRIN1;SRF;HES2;ZNF268;MNT;UNK;WWC1;HOXC8;CELF1;NFX1;PTPN2;KAT7;SUV39H1;TSHZ2;LIMS1;TFDP2;ZNF154;ZNF485;CC2D1B;HEYL;PEX2;CNBP;T…	nucleus localization	2	0.0112071	TRIM58;HOOK3	acyl-CoA biosynthetic process	5	0.00606546	PDK1;PDP2;ACSL6;ELOVL5;SCD	regulation of cell junction assembly	5	0.0047302	CAV1;SNAI2;LIMS1;PPM1F;OCLN
organic cyclic compound catabolic process	16	0.00236614	HMGB1;CNOT4;FXR1;LDHA;ZBTB20;TNRC6B;MAPKAPK2;SYNCRIP;DDX6;BTG2;LARP1;CNOT6L;TNRC6A;SMG1;DIS3L;RBM8A	regulation of stress-activated protein kinase signaling cascade	3	0.0191276	MEN1;TAOK1;MAP3K9	sequence-specific DNA binding	69	0.000818552	NONO;KCNIP3;EMX2;SPIB;GATAD2A;CREBRF;PHF19;ESR1;MACC1;CREB1;SMARCC1;RFX3;MYOCD;E2F5;PGR;HIC2;REST;NSD2;ZNF704;LEF1;SMAD4;SSBP2;MYCN;PLAGL2;KLF13;RARA;PAX2;NRF1;PROX1;RORA;CHD4;MAZ;BHLHE40;DHX33;SRF;HES2;MNT;HOXC8;NFX1;PCGF3;KAT7;TARDBP;ELK1;SUV39H1;GRWD1;TFDP2;MAFF;PKNOX1;ZNF485;CC2D1B;GMEB1;HEYL;MLXIP;CREB3L2;FOSL1;IKZF3;CNBP;TP53;E2F2;ZBTB16;NFIC;SOX7;KDM2B;REL;BACH2;FOXE1;PRDM4;POU2F1;GTF2H5	mitotic cytokinetic process	2	0.0112071	ARF1;RHOA	cellular glucan metabolic process	6	0.00607086	IRS1;HMGB1;G6PC;GSK3B;PPP1R3B;PGM2L1	negative regulation of protein modification process	15	0.00476802	MGAT5;PPP1R1A;CAV1;CTDSPL;CDKN1A;SH3BP5;ARPP19;GNL3L;DNMT3B;SKI;NTRK3;PPM1F;PRKAA1;TRAF3IP1;IGF1R
symbiont process	18	0.00238003	CAV1;PPIA;MET;BCL2;ULBP2;REST;LEF1;VPS37B;CCR5;SYNCRIP;DDX6;RNF216;RAB11FIP4;SYK;CBX5;LARP1;POLR2E;USP7	muscle organ morphogenesis	2	0.0191387	TGFBR1;ARID5B	tissue morphogenesis	43	0.000852412	MYBPC1;MICAL2;ESR1;STC1;ACTA1;VEGFA;PGR;PML;GRB2;SUFU;LEF1;SMAD4;SDC4;DDR1;RARA;WNT3;PAX2;CFL1;NTN1;CCL11;PROX1;CRB2;S1PR1;MDM2;SRF;DVL1;ITGA2;STK4;FMN1;WNT9B;ITGA3;MTHFR;AP2M1;HEYL;RAB10;MTHFD1;TGFBR1;FEM1B;BMPR2;KDM2B;FOXE1;VWA1;PLXND1	lens development in camera-type eye	3	0.0112195	SKIL;NTRK3;FRS2	glucan metabolic process	6	0.00607086	IRS1;HMGB1;G6PC;GSK3B;PPP1R3B;PGM2L1	positive regulation of RNA biosynthetic process	32	0.0047725	E2F6;TCERG1;HMGB1;MICAL2;FOXK2;HMBOX1;ZBED1;POU2F1;ELK4;REST;ESR1;NR2C2;AR;TMEM189-UBE2V1;AGO2;MTDH;ETS1;NFIX;FSTL3;GTF2H1;SKI;REL;INSIG1;PADI2;RNF111;HMGA2;RREB1;COL1A1;JMY;PRKAA1;MTF1;SOX2
viral process	17	0.00240822	CAV1;PPIA;BCL2;ULBP2;REST;LEF1;VPS37B;CCR5;SYNCRIP;DDX6;RNF216;RAB11FIP4;SYK;CBX5;LARP1;POLR2E;USP7	regulation of JUN kinase activity	2	0.0191387	TAOK1;MAP3K9	neutrophil degranulation	36	0.000873049	SURF4;CD55;HMGB1;VAMP2;NFAM1;MAPK14;CYBB;PPIA;SIGLEC14;PTGES2;PDXK;RAB7A;RAB5C;RAB5B;PKP1;GM2A;RAP1A;ADA2;MAGT1;FLG2;MAPK1;NFASC;RAB10;COMMD9;TSPAN14;PLAC8;SYK;QSOX1;HPSE;PGAM1;MLEC;METTL7A;CD68;CAB39;VAMP8;PAFAH1B2	rhythmic process	6	0.0114267	STAR;CRY2;NTRK3;CASP2;PRKAA1;SIAH2	snRNA transcription	6	0.00607086	CDK9;POU2F2;PHAX;POU2F1;NABP1;RPRD2	positive regulation of molecular function	34	0.00494095	OPHN1;CAB39;HMGB1;CAV1;CDKN1A;HMBOX1;IRAK4;REST;ESR1;TAOK1;STK4;WNT9B;AR;TMEM189-UBE2V1;RAP1GAP2;MINK1;FXN;MTDH;GNL3L;SNX18;SKI;LIMS1;BID;FER;NTRK3;HMGA2;IL6R;PPM1F;JMY;DAZAP2;EPHA4;FRS2;PRKAA1;CHML
transcription regulatory region DNA binding	20	0.00243229	HMGB1;HNF4A;RFX3;MYOCD;REST;LEF1;SMAD4;MYCN;POU2F1;ZBTB20;ZHX3;BASP1;SATB2;SMAD2;ELK1;MNT;HEYL;HES2;ZNF704;NFIC	regulation of actomyosin structure organization	2	0.0195585	TGFBR1;PPM1F	negative regulation of biosynthetic process	90	0.000877016	NONO;KCNIP3;GATAD2A;HMGB1;ZNF417;SAMD4A;CAV1;ESR1;CBX5;DKK3;BACE2;NACC1;CREB1;GNL3L;RFX3;MYOCD;VEGFA;KDM5C;CELF4;E2F5;IGF2BP1;ERRFI1;PML;SUFU;HIC2;REST;NSD2;FXR1;CDKN1B;RPS6KA5;LEF1;SMAD4;MDM4;RARA;CBX2;PAX2;TOB2;AGO2;BTG2;CNOT6L;SESN2;CALR;PROX1;FGF9;MDM2;BASP1;BHLHE40;CAPRIN1;SRF;HES2;ZNF268;MNT;UNK;RAP1A;WWC1;HOXC8;CELF1;NFX1;PTPN2;KAT7;SUV39H1;TSHZ2;LIMS1;TFDP2;ZNF154;ZNF485;CC2D1B;HEYL;PEX2;…	astrocyte differentiation	3	0.0116654	TAL1;NTRK3;EPHA4	positive regulation of endothelial cell migration	7	0.00614745	HMGB1;BMPR2;SEMA5A;FGFR1;ETS1;GPI;GATA2	response to corticosteroid	7	0.00497101	HMGB1;CDKN1A;REST;DNMT3B;NTRK3;COL1A1;ZFP36L2
fusion of virus membrane with host plasma membrane	2	0.00249051	PPIA;CCR5	positive regulation of histone modification	2	0.0195585	MYB;UBE2N	cellular component morphogenesis	68	0.000911591	TSKU;EPHB1;ULK2;RNF165;MYBPC1;RAB21;PALM;FBXW8;MAPK14;STC1;OPA3;PAK3;TRIOBP;CREB1;ACTA1;VEGFA;GRB2;LAMC1;RPS6KA5;LEF1;SMAD4;UST;ADD1;DPYSL2;DDR1;WNT3;PAX2;MYH14;CALR;CFL1;NTN1;CCL11;PROX1;PLCG1;PARVA;CAPRIN1;UNC5B;SRF;DVL1;UNK;STK4;EEF2K;LIMS1;GDI1;EFNA3;MAPK1;NFASC;RAB10;MKLN1;CAMK2A;STK11;SLC11A2;MYPN;CABP4;VSIG1;PIK3R1;FITM2;BMPR2;NYAP2;MYLK3;ZNF135;SEMA5A;EFNA5;VWA1;ANTXR1;PLXNA3;PLXND1;RAPH1	positive regulation of cell projection organization	7	0.0116721	ARF1;RHOA;TRIM67;SKIL;NTRK3;EPHA4;AKIRIN1	positive regulation of extrinsic apoptotic signaling pathway via death domain receptors	3	0.0063719	PEA15;STK4;PMAIP1	tetrapyrrole biosynthetic process	3	0.0050324	FXN;COX10;IBA57
membrane fusion involved in viral entry into host cell	2	0.00249051	PPIA;CCR5	protein kinase B signaling	3	0.0195665	PHLDA3;ILK;TGFBR1	Melanoma	10	0.000937709	CDKN1A;CDK6;FGF9;MDM2;MAPK1;AKT2;TP53;E2F2;PIK3R1;BAK1	response to monosaccharide	5	0.0117649	STAR;RHOA;TXNIP;KCNB1;PRKAA1	toll-like receptor 2 signaling pathway	3	0.0063719	HMGB1;TIRAP;F2RL1	prostate gland morphogenesis	3	0.0050324	ESR1;AR;FRS2
multi-organism membrane fusion	2	0.00249051	PPIA;CCR5	positive regulation of cardiac epithelial to mesenchymal transition	1	0.0196004	TGFBR1	axonogenesis	34	0.00094931	TSKU;EPHB1;ULK2;RNF165;RAB21;PAK3;CREB1;VEGFA;GRB2;RPS6KA5;SMAD4;UST;DPYSL2;WNT3;PAX2;NTN1;PLCG1;UNC5B;SRF;DVL1;GDI1;EFNA3;MAPK1;NFASC;RAB10;STK11;MYPN;PIK3R1;BMPR2;SEMA5A;EFNA5;PLXNA3;PLXND1;RAPH1	gene silencing	5	0.0117649	TNRC6B;TNRC6C;AGO1;NCOR2;DOT1L	ncRNA 5'-end processing	3	0.0063719	USP14;RPP25;TRMT10C	modulation of transcription in other organism involved in symbiotic interaction	3	0.0050324	REST;NTRK3;HMGA2
phenotypic switching	2	0.00249051	SOD2;MYOCD	regulation of epithelial to mesenchymal transition involved in endocardial cushion formation	1	0.0196004	TGFBR1	regulation of cellular localization	57	0.000955898	RAB21;P2RX3;CAV1;VAMP2;VAMP1;F2RL3;MAPK14;UHMK1;GNL3L;PML;SUFU;YWHAZ;NLGN2;PPP1R12A;CRIPT;CCNE2;HPS4;IQSEC2;SESN2;RAB11B;CENPQ;PLCG1;BBC3;MDM2;DVL1;RAP1A;YOD1;SAR1B;WWC1;KAT7;ITGA3;TARDBP;GPSM2;TFDP2;AP2M1;GDI1;UBE2G2;MAPK1;CAMK2A;SAR1A;STK11;BCAS3;NTSR1;AKT2;TP53;SYK;STX1B;PIK3R1;MIEF1;CD84;STX6;EFNA5;BAK1;XPO5;WNK3;EHD1;VAMP8	response to hydrogen peroxide	4	0.0117944	STAR;TXNIP;COL1A1;PRKAA1	transmembrane receptor protein serine/threonine kinase activity	3	0.0063719	BMPR2;TGFBR1;ACVR1B	fat cell differentiation	8	0.00505138	METRNL;STK4;SNAI2;INSIG1;SOCS7;HMGA2;CCDC71L;ZFP36L2
regulation of phenotypic switching	2	0.00249051	SOD2;MYOCD	negative regulation of protein kinase activity by regulation of protein phosphorylation	1	0.0196004	PPM1F	positive regulation of catalytic activity	83	0.000957677	CCND2;PABPN1;ABL2;MAP3K9;RASGEF1B;HACD3;HMGB1;CAV1;CDKN1A;ESR1;DSTYK;MAPK14;PAK3;IL6R;VEGFA;ACAP2;ERRFI1;PML;REST;OXSR1;CDKN1B;PPP1R12A;VAV3;SDC4;PTPA;PGAM5;DUSP9;UBE2S;RGS6;NEK4;GNG3;ARHGAP31;CCL11;PROX1;PRLR;GRIN2B;PLCG1;DCUN1D5;RASGRF1;S1PR1;BBC3;MAPKAPK2;GM2A;RAP1A;ITGA2;OSBPL8;STK4;DIRAS2;PSME3;WNT9B;CCL22;LIMS1;RACGAP1;GDI1;SYAP1;EFNA3;MAPK1;UBE2N;MAP4K2;MAPK8IP3;STK11;GTF2F1;GAPVD1;BCAS3;A…	cell cycle	20	0.0118835	NR3C1;ARL3;ARF1;GNAI1;CKS1B;TAL1;RHOA;TUBB;TXNIP;DOT1L;SPC24;SKIL;JMY;ZFP36L2;DDB1;CASP2;PRKAA1;MCMBP;SIAH2;ANXA11	nucleotide phosphorylation	7	0.0065041	ARNT;DHTKD1;GPI;PFKFB3;ENTPD5;PGM2L1;PFKFB2	negative regulation of mitotic cell cycle	9	0.00507847	CTDSPL;CDKN1A;NME6;TAOK1;HMGA2;BTG1;ZFP36L2;CASP2;CNOT6L
SMAD protein complex	2	0.00249051	SMAD4;SMAD2	ventricular compact myocardium morphogenesis	1	0.0196004	TGFBR1	neutrophil activation involved in immune response	36	0.000974902	SURF4;CD55;HMGB1;VAMP2;NFAM1;MAPK14;CYBB;PPIA;SIGLEC14;PTGES2;PDXK;RAB7A;RAB5C;RAB5B;PKP1;GM2A;RAP1A;ADA2;MAGT1;FLG2;MAPK1;NFASC;RAB10;COMMD9;TSPAN14;PLAC8;SYK;QSOX1;HPSE;PGAM1;MLEC;METTL7A;CD68;CAB39;VAMP8;PAFAH1B2	cellular response to acid chemical	5	0.0119988	CASTOR2;NTRK3;COL1A1;PRKAA1;IREB2	regulation of triglyceride metabolic process	4	0.0065443	PANK2;ATG14;PLIN5;LDLR	positive regulation of cellular biosynthetic process	37	0.00518395	E2F6;TCERG1;YTHDF1;HMGB1;SAMD4A;MICAL2;FOXK2;HMBOX1;ZBED1;TLR7;POU2F1;ELK4;REST;ESR1;NR2C2;ARPP19;AR;CD3E;TMEM189-UBE2V1;AGO2;MTDH;ETS1;NFIX;FSTL3;GTF2H1;SKI;REL;INSIG1;PADI2;RNF111;HMGA2;RREB1;COL1A1;JMY;PRKAA1;MTF1;SOX2
response to lipid	20	0.00249527	HMGB1;CAV1;HNF4A;TPCN2;BCL2;REST;ERRFI1;LEF1;AKAP13;CCR5;STC2;MAPKAPK2;SMAD2;SCD;ELK1;LDOC1;HEYL;EFNA5;GRAMD1B;HMGCS1	serine C-palmitoyltransferase complex	1	0.0196004	ORMDL3	response to decreased oxygen levels	26	0.000992467	P2RX3;CAV1;STC1;CYBB;PDK3;CREB1;MYOCD;VEGFA;PML;REST;CDKN1B;SMAD4;MDM4;LDHA;SLC29A1;RORA;MDM2;SRF;ITGA2;MTHFR;SUV39H1;EEF2K;SLC11A2;TP53;AHCY;HIF1AN	positive regulation of steroid metabolic process	2	0.0121286	STAR;PRKAA1	regulation of glycogen metabolic process	4	0.0065443	IRS1;HMGB1;GSK3B;PPP1R3B	Fostamatinib	10	0.00522475	IRAK4;TAOK1;PRPF4B;MINK1;PIP4K2C;MAPK13;FER;NTRK3;EPHA4;PRKAA1
positive regulation of phosphorylation	22	0.00250147	IRS1;HMGB1;CAV1;MET;BCL2;IL6R;RPS6KA5;SMAD4;AKAP13;ZBTB20;IGFBP4;GNG3;MAPKAPK2;DIRAS2;CCL22;MAP4K2;STK11;SYK;EFNA5;SDC4;SRCIN1;PEA15	endoplasmic reticulum palmitoyltransferase complex	1	0.0196004	ORMDL3	RNA binding	94	0.000994765	TPD52L2;TNS1;NONO;DDX6;IBA57;PABPN1;RPL28;DHFR2;YTHDF1;HMGB1;SAMD4A;UHMK1;PHAX;CARHSP1;TPT1;PPIA;RBM12;TRUB2;GNL3L;LUC7L2;CELF4;TRA2B;WDR33;CASC3;IGF2BP1;GRB2;EIF4H;FNDC3B;YWHAZ;CSTF3;FXR1;DDX19B;ADD1;SRSF10;RALY;BZW1;CFAP65;RARA;AGO2;CALR;HDLBP;GTPBP10;MAZ;MDM2;GTPBP1;RRP7A;CAPRIN1;RPS24;DHX33;SRF;ADAT1;UNK;PRPF4B;CELF1;KRI1;NFX1;ZC3H15;ZNF106;TARDBP;MRPS23;EEF2K;TIAL1;GRWD1;TEP1;MEX3A;SF3A1;SER…	porphyrin-containing compound biosynthetic process	2	0.0121286	COX10;IREB2	negative regulation of signaling receptor activity	4	0.0065443	HEYL;CBL;GPRC5A;CLEC12B	small RNA loading onto RISC	2	0.00529873	AGO3;AGO2
autophagy	13	0.00252307	HMGB1;SPTLC2;MET;MFSD8;TPCN2;BCL2;VPS37B;TECPR2;PIK3R2;STK11;LARP1;TP53INP2;PIP4K2B	protein-cysteine S-palmitoyltransferase complex	1	0.0196004	ORMDL3	positive regulation of neuron projection development	23	0.00100981	ABL2;RAB21;FBXW8;PAK3;CRTC1;PTK6;VEGFA;WNT3;NTN1;CAPRIN1;SRF;DVL1;RAP1A;ITGA3;EEF2K;GDI1;CREB3L2;STK11;BMPR2;SEMA5A;EFNA5;PLXNA3;PLXND1	regulation of protein exit from endoplasmic reticulum	2	0.0121286	INSIG1;SEC16A	positive regulation of protein metabolic process	53	0.0065686	MYB;MAP3K2;HMGB1;MAVS;CDK9;BMPR2;APOPT1;SOX7;TIRAP;NKD1;BMP7;ARNT;CRK;DBF4;SYAP1;IL6R;GRIN2B;F2RL1;DSTYK;CYCS;ATG14;PRKAR2A;FGFR1;SAMD5;LDLR;BCL2L11;BCL6;PEA15;FAM107A;GSK3B;FKBP1A;TRIM67;IKBKG;GPRC5A;GNAI2;TRMT10C;CDC14B;TGFBR1;CAB39;RIF1;MAP3K9;STK4;TYRO3;ACVR1B;GPR183;LAMTOR1;PMAIP1;WNK3;MAPK1;TIMM17A;RMND1;NPNT;UHMK1	response to granulocyte macrophage colony-stimulating factor	2	0.00529873	ETV3;ZFP36L2
process utilizing autophagic mechanism	13	0.00252307	HMGB1;SPTLC2;MET;MFSD8;TPCN2;BCL2;VPS37B;TECPR2;PIK3R2;STK11;LARP1;TP53INP2;PIP4K2B	flap endonuclease activity	1	0.0196004	GEN1	exocytosis	58	0.00103298	SURF4;CD55;SERPINA4;RAB21;HMGB1;RPH3AL;VAMP2;VAMP1;NFAM1;MAPK14;CYBB;STX2;PPIA;SIGLEC14;VEGFA;REST;PHACTR2;PTGES2;PDXK;RAB7A;SDC4;RAB11B;RAB5C;EXOC7;RAB5B;PKP1;GM2A;DVL1;RAP1A;ADA2;OLA1;MAGT1;PRRT2;FLG2;MAPK1;NFASC;RAB15;ANK1;RAB10;CAMK2A;COMMD9;TSPAN14;PLAC8;SYK;STX1B;QSOX1;HPSE;PGAM1;CD84;VPS41;RAB11FIP1;MLEC;METTL7A;CD68;CAB39;VAMP8;TMED10;PAFAH1B2	regulation of microtubule-based process	5	0.0122359	TRIM58;GNAI1;RHOA;PRKAA1;TRAF3IP1	cellular polysaccharide metabolic process	7	0.00687592	IRS1;HMGB1;B3GNT2;G6PC;GSK3B;PPP1R3B;PGM2L1	vascular associated smooth muscle cell apoptotic process	2	0.00529873	SOD2;STK4
cell growth	13	0.00252307	HNF4A;BCL2;MYOCD;LEF1;SMAD4;AKAP13;SEMA4G;IGFBP4;TMEM97;GDI1;STK11;EFNA5;GSK3B	5'-3' exodeoxyribonuclease activity	1	0.0196004	GEN1	chemotaxis	43	0.00103537	EPHB1;CCR5;RNF165;HMGB1;MAPK14;CREB1;IL6R;VEGFA;GRB2;OXSR1;RPS6KA5;LEF1;SMAD4;VAV3;DPYSL2;WNT3;CALR;NTN1;CCL11;PLCG1;S1PR1;PARVA;UNC5B;DVL1;ITGA2;PTPN2;CCL22;EFNA3;MAPK1;NFASC;FOSL1;TNFSF14;MYPN;SYK;PIK3R1;BMPR2;USP14;SEMA5A;FFAR2;EFNA5;SPN;PLXNA3;PLXND1	positive regulation of kinase activity	9	0.0123146	CKS1B;TAL1;RHOA;ATG13;NTRK3;EPHA4;DAZAP2;FRS2;PRKAA1	negative regulation of signal transduction	41	0.00691486	IRS1;DCC;TMEM170B;NLGN4X;CREBRF;FXN;PIAS2;TSPAN6;SIK2;NKD1;BMP7;THEM4;F2RL1;PHLDA3;FGFR1;HEYL;VHL;PLIN5;TNFAIP8L1;CTNND1;BCL6;PEA15;GSK3B;ONECUT1;CD109;FKBP1A;CBL;TRIM67;NXN;PEG10;GPRC5A;GNAI2;GATA2;TGFBR1;TRIM72;LILRA2;MTRNR2L1;STK4;TYRO3;SOCS7;EPS15L1	regulation of vascular associated smooth muscle cell apoptotic process	2	0.00529873	SOD2;STK4
anterior/posterior pattern specification	8	0.00254388	HOXC8;LEF1;SMAD4;BASP1;SMAD2;BTG2;HES2;EMX2	Arp2/3 complex binding	1	0.0196004	JMY	Kaposi sarcoma-associated herpesvirus infection	18	0.00106457	CCR5;CDKN1A;MAPK14;CREB1;VEGFA;CDK6;GNG3;PLCG1;MAPKAPK2;GNB4;MAPK1;CALML3;AKT2;TP53;SYK;E2F2;PIK3R1;BAK1	cell-cell signaling by wnt	8	0.0124723	TNRC6B;TNRC6C;RHOA;AGO1;COL1A1;DDB1;PRKAA1;SIAH2	positive regulation of phosphorus metabolic process	38	0.00723502	IRS1;MAP3K2;HMGB1;MAVS;CDK9;BMPR2;TIRAP;BMP7;ARNT;CRK;DBF4;SYAP1;IL6R;F2RL1;DSTYK;ATG14;PRKAR2A;FGFR1;SAMD5;PEA15;IKBKG;PFKFB3;GPRC5A;GNAI2;TGFBR1;CAB39;MAP3K9;ENTPD5;STK4;TYRO3;ACVR1B;GPR183;LAMTOR1;MTMR9;WNK3;MAPK1;PFKFB2;NPNT	RISC-loading complex	2	0.00529873	AGO3;AGO2
protein phosphorylation	34	0.00256642	IRS1;HMGB1;CAV1;MET;BCL2;CDK6;IL6R;GMFB;MYOCD;ERRFI1;RPS6KA5;CCNE2;SMAD4;AKAP13;CCR5;IGFBP4;GNG3;MAPKAPK2;SMAD2;DIRAS2;CCL22;PIK3R2;MAP4K2;STK11;SYK;PHKG2;EFNA5;SDC4;SMG1;SRCIN1;PEA15;IL2RA;NEK9;GSK3B	JUN kinase kinase kinase activity	1	0.0196004	MAP3K9	serine/threonine protein kinase complex	11	0.00106974	CCND2;CDKN1A;ERC1;CDK6;CCNE2;SESN2;ACVR2A;TGFBR1;PHKG2;CCNT1;CAB39	intrinsic apoptotic signaling pathway	6	0.0125862	MCL1;CYCS;SKIL;PPM1F;JMY;CASP2	positive regulation of phosphate metabolic process	38	0.00723502	IRS1;MAP3K2;HMGB1;MAVS;CDK9;BMPR2;TIRAP;BMP7;ARNT;CRK;DBF4;SYAP1;IL6R;F2RL1;DSTYK;ATG14;PRKAR2A;FGFR1;SAMD5;PEA15;IKBKG;PFKFB3;GPRC5A;GNAI2;TGFBR1;CAB39;MAP3K9;ENTPD5;STK4;TYRO3;ACVR1B;GPR183;LAMTOR1;MTMR9;WNK3;MAPK1;PFKFB2;NPNT	nuclear lamina	2	0.00529873	SUV39H1;LMNB1
cell-cell signaling	30	0.00258325	OPHN1;IRS1;CAV1;HNF4A;MET;GRM7;RFX3;CELF4;REST;LEF1;SMAD4;SYT7;NPTXR;TMEM198;CCR5;IGFBP4;IQSEC2;TNRC6B;RAB11B;SMAD2;PTPRN2;ITGA3;PRRT2;CCL22;RNF216;STK11;EFNA5;TNRC6A;SHISA9;GSK3B	arginine binding	1	0.0196004	CASTOR2	Colorectal cancer	11	0.00106974	CDKN1A;GRB2;LEF1;SMAD4;BBC3;MAPK1;AKT2;TP53;TGFBR1;PIK3R1;BAK1	nuclear-transcribed mRNA catabolic process, deadenylation-dependent decay	3	0.0125875	TNRC6B;TNRC6C;ZFP36L2	purine nucleoside diphosphate metabolic process	7	0.00726329	ARNT;DHTKD1;GPI;PFKFB3;ENTPD5;PGM2L1;PFKFB2	ferroxidase activity	2	0.00529873	FXN;HEPHL1
energy reserve metabolic process	5	0.00258526	PPP1R1A;IRS1;HMGB1;PHKG2;GSK3B	RNA polymerase I CORE element sequence-specific DNA binding	1	0.0196004	UBTF	double-stranded DNA binding	59	0.00108405	NONO;KCNIP3;SPIB;CREBRF;HMGB1;ESR1;MACC1;CREB1;SMARCC1;RFX3;MYOCD;PGR;HIC2;REST;ZNF704;LEF1;SMAD4;SSBP2;MYCN;KLF13;RARA;PAX2;NRF1;PROX1;RORA;CHD4;MAZ;BHLHE40;DHX33;SRF;HES2;MNT;NFX1;PCGF3;KAT7;TARDBP;ELK1;SUV39H1;GRWD1;TFDP2;MAFF;CC2D1B;GMEB1;HEYL;MLXIP;CREB3L2;FOSL1;IKZF3;CNBP;TP53;E2F2;ZBTB16;NFIC;KDM2B;REL;BACH2;PRDM4;POU2F1;GTF2H5	response to hormone	13	0.0126018	STAR;ADIPOR2;NR3C1;CRY2;PIK3R2;GNAI1;RHOA;TXNIP;NCOR2;NTRK3;COL1A1;ZFP36L2;PRKAA1	purine ribonucleoside diphosphate metabolic process	7	0.00726329	ARNT;DHTKD1;GPI;PFKFB3;ENTPD5;PGM2L1;PFKFB2	oxidoreductase activity, oxidizing metal ions, oxygen as acceptor	2	0.00529873	FXN;HEPHL1
positive regulation of phosphorus metabolic process	23	0.00258948	IRS1;HMGB1;CAV1;MET;BCL2;IL6R;RPS6KA5;PPP1R12A;SMAD4;AKAP13;ZBTB20;IGFBP4;GNG3;MAPKAPK2;DIRAS2;CCL22;MAP4K2;STK11;SYK;EFNA5;SDC4;SRCIN1;PEA15	endosome	6	0.0197719	RAB15;AP2M1;ANKRD13B;TGFBR1;OCA2;STAM	taxis	43	0.00110363	EPHB1;CCR5;RNF165;HMGB1;MAPK14;CREB1;IL6R;VEGFA;GRB2;OXSR1;RPS6KA5;LEF1;SMAD4;VAV3;DPYSL2;WNT3;CALR;NTN1;CCL11;PLCG1;S1PR1;PARVA;UNC5B;DVL1;ITGA2;PTPN2;CCL22;EFNA3;MAPK1;NFASC;FOSL1;TNFSF14;MYPN;SYK;PIK3R1;BMPR2;USP14;SEMA5A;FFAR2;EFNA5;SPN;PLXNA3;PLXND1	cellular response to stress	21	0.0126052	FNIP1;CRY2;PIK3R2;SETD7;MCL1;ULK1;CYCS;RHOA;ATG13;DOT1L;SLC30A9;SKIL;INSIG1;NTRK3;JMY;DDB1;EPHA4;CASP2;SEC16A;PRKAA1;IREB2	regulation of phosphatidylinositol dephosphorylation	2	0.00737205	MTMR3;MTMR9	RNA 7-methylguanosine cap binding	2	0.00529873	AGO2;NCBP3
positive regulation of phosphate metabolic process	23	0.00258948	IRS1;HMGB1;CAV1;MET;BCL2;IL6R;RPS6KA5;PPP1R12A;SMAD4;AKAP13;ZBTB20;IGFBP4;GNG3;MAPKAPK2;DIRAS2;CCL22;MAP4K2;STK11;SYK;EFNA5;SDC4;SRCIN1;PEA15	cell junction assembly	3	0.0202352	ACTB;ILK;PPM1F	regulation of cellular catabolic process	51	0.00111452	CSNK2A1;ABL2;ULK2;MYLIP;RNF144B;HMGB1;SAMD4A;CAV1;FBXW8;MAPK14;DEPP1;CARHSP1;SMARCC1;IGF2BP1;PML;SUFU;YWHAZ;FXR1;AGO2;BTG2;CNOT6L;SESN2;DDA1;ATP6V1A;EXOC7;MDM2;GTPBP1;PKP1;MAPKAPK2;PDE12;DVL1;YOD1;PSME3;TARDBP;UBE2G2;OPTN;SERBP1;CISD2;STK11;ZC3HAV1;PSMF1;AKT2;PHKG2;QSOX1;RRAGD;METTL14;LARP1;PGAM1;USP14;SNX9;PAFAH1B2	regulation of cysteine-type endopeptidase activity involved in apoptotic process	5	0.0127196	FNIP1;CYCS;RHOA;PPM1F;SIAH2	regulation of glycogen catabolic process	2	0.00737205	HMGB1;PPP1R3B	Stanolone	2	0.00529873	ESR1;AR
lymph vessel development	3	0.00260155	SYK;VASH1;PTPN14	negative regulation of phosphorylation	4	0.0202354	MEN1;ILK;CD109;PPM1F	HIF-1 signaling pathway	12	0.00114319	CDKN1A;CYBB;IL6R;VEGFA;CDKN1B;LDHA;PLCG1;CAMK2G;MAPK1;CAMK2A;AKT2;PIK3R1	nuclear-transcribed mRNA catabolic process	5	0.0127196	TNRC6B;TNRC6C;AGO1;RBM8A;ZFP36L2	glutamine transport	2	0.00737205	SLC1A5;SLC38A2	Methyltestosterone	2	0.00529873	ESR1;AR
mesenchyme morphogenesis	4	0.00264856	LEF1;SMAD4;SMAD2;HEYL	supramolecular fiber organization	5	0.0202816	ILK;TAOK1;TGFBR1;PPM1F;JMY	adenyl ribonucleotide binding	89	0.00114362	EPHB1;DDX6;TTF2;CSNK2A1;ABL2;MAP3K9;ULK2;P2RX3;ACTR1A;DSTYK;MAPK14;UHMK1;PAK3;ATP2B1;PDK3;PRPS1;PTK6;ACTA1;DYRK2;CDK6;AGK;OXSR1;NME4;RPS6KA5;DDX19B;PDXK;RPS6KA3;PTPA;DDR1;MAT2A;MYH14;UBE2S;SOAT1;NEK4;ATP6V1A;MAT1A;SMC2;CHD4;NPR1;ADCY6;PIK3C2B;MAPKAPK2;KSR2;CAMK2G;DHX33;STK4;PRPF4B;GNE;STK35;MCM8;OLA1;EEF2K;TEP1;AK3;UBE2G2;MAPK1;YME1L1;ADCY2;UBE2N;RPS6KA4;MAP4K2;CAMK2A;STK11;ACVR2A;XRCC2;AKT2;GK5;…	negative regulation of protein complex assembly	4	0.0127303	ULK1;TMOD2;INSIG1;TRAF3IP1	actin cortical patch assembly	2	0.00737205	WIPF3;WIPF2	Stanolone acetate	2	0.00529873	ESR1;AR
hormone secretion	10	0.00265869	IRS1;HNF4A;RFX3;REST;SMAD4;SYT7;RAB11B;SMAD2;PTPRN2;EFNA5	post-embryonic development	2	0.0204099	TGFBR1;ARID5B	axon development	36	0.00116794	TSKU;EPHB1;ULK2;RNF165;RAB21;PAK3;CREB1;VEGFA;GRB2;RPS6KA5;SMAD4;UST;DPYSL2;DDR1;WNT3;PAX2;NTN1;PLCG1;UNC5B;SRF;DVL1;GDI1;EFNA3;MAPK1;NFASC;RAB10;MAPK8IP3;STK11;MYPN;PIK3R1;BMPR2;SEMA5A;EFNA5;PLXNA3;PLXND1;RAPH1	organelle assembly	12	0.0127584	TNPO1;ARL3;ULK1;RHOA;TUBB;TMOD2;ATG13;PIKFYVE;NTRK3;PRKAA1;TRAF3IP1;C5orf30	actin cortical patch organization	2	0.00737205	WIPF3;WIPF2	positive regulation of protein kinase activity	14	0.00538232	CAB39;HMGB1;CDKN1A;TAOK1;STK4;TMEM189-UBE2V1;MINK1;NTRK3;HMGA2;IL6R;DAZAP2;EPHA4;FRS2;PRKAA1
regulation of cell adhesion	16	0.00271337	HMGB1;CAV1;BCL2;CDK6;IL6R;PPP1R12A;LEF1;ITGA3;SYK;PAG1;EFNA5;ADAM19;SDC4;SPN;IL2RA;GSK3B	roof of mouth development	2	0.0204099	TGFBR1;ARID5B	secretory vesicle	62	0.00117611	SURF4;CD55;SERPINA4;HMGB1;RPH3AL;CAV1;VAMP2;VAMP1;NFAM1;MAPK14;BACE2;CYBB;THBS2;STX2;PPIA;SIGLEC14;VEGFA;PHACTR2;PTGES2;PDXK;HPS4;SLC6A17;RAB7A;RPH3A;CALR;RAB11B;RAB5C;RAB5B;PKP1;GM2A;RAP1A;ADA2;OLA1;ECE1;MAGT1;PRRT2;RACGAP1;FLG2;MAPK1;NFASC;RAB15;RAB10;COMMD9;TSPAN14;TBXA2R;KLK2;PLAC8;FSTL3;ABHD2;STX1B;QSOX1;HPSE;PGAM1;TPRG1L;STX6;MLEC;METTL7A;CD68;CAB39;VAMP8;TMED10;PAFAH1B2	macroautophagy	6	0.0127873	VPS13D;ULK1;ATG13;PIKFYVE;EPG5;PRKAA1	actin cortical patch localization	2	0.00737205	WIPF3;WIPF2	glutamate receptor signaling pathway	5	0.00545959	GRID1;CACNG8;SHISA9;MINK1;KCNB1
establishment of protein localization to membrane	10	0.00272044	BCL2;MOAP1;AGK;SRP14;ZDHHC22;UBL4A;RAB11B;GDI1;MIEF1;TCAF1	protein methyltransferase activity	2	0.0204099	SUV39H1;MEN1	regulation of cell adhesion	45	0.00118068	ABL2;CD55;PLEKHA2;MDGA1;HMGB1;CAV1;UTRN;MAPK14;PAK3;TRIOBP;IL6R;VEGFA;PML;GRB2;CDK6;PPP1R12A;LEF1;VAV3;CD164;SDC4;DDR1;RARA;CALR;S1PR1;SRF;EMID1;ITGA2;PTPN2;FMN1;ITGA3;LIMS1;IL2RA;TNFSF14;BCAS3;FSTL3;SYK;ZBTB16;PIK3R1;IL23R;SEMA5A;EFNA5;SPN;PLXNA3;ADAM19;PLXND1	extrinsic component of membrane	6	0.0129905	PIK3R2;VPS13D;ULK1;GNAI1;RHOA;ATG13	AP-1 adaptor complex	2	0.00737205	SYNRG;AP1S1	negative regulation of mitotic cell cycle phase transition	7	0.00547423	CTDSPL;CDKN1A;TAOK1;HMGA2;ZFP36L2;CASP2;CNOT6L
catalytic step 2 spliceosome	5	0.00272049	SF3B3;RALY;SYNCRIP;RBM8A;PNN	negative regulation of kinase activity	3	0.0206879	MEN1;ILK;PPM1F	response to endoplasmic reticulum stress	23	0.00123458	CREBRF;CAV1;SYVN1;GOSR2;PML;ADD1;SESN2;CALR;RASGRF1;BBC3;YOD1;UGGT1;PTPN2;TARDBP;GRINA;UBE2G2;CREB3L2;UFM1;TP53;SSR1;PIK3R1;USP14;BAK1	regulation of peptidyl-serine phosphorylation	4	0.0130525	FNIP1;NTRK3;PPM1F;PRKAA1	cerebellar mossy fiber	2	0.00737205	CACNG7;NFIB	chromatin organization	18	0.00570948	HMGB1;GATAD1;ELK4;REST;ESR1;MTHFR;SUV39H1;JADE2;DNMT3B;SNAI2;SKI;PADI2;HMGA2;SAP30L;PPM1F;DDB1;PRKAA1;SOX2
regulation of intracellular transport	12	0.0027836	GAS1;PPP1R12A;SYT7;RAB11B;GDI1;PIK3R2;SYK;MIEF1;PTPN14;TCAF1;XPO4;GSK3B	regulation of phosphate metabolic process	9	0.0208176	ACTB;UBE2N;MEN1;ILK;TAOK1;CD109;TGFBR1;MAP3K9;PPM1F	Melanogenesis	12	0.00124801	CREB1;LEF1;WNT3;ADCY6;CAMK2G;DVL1;WNT9B;MAPK1;CALML3;ADCY2;CREB3L2;CAMK2A	cellular response to fibroblast growth factor stimulus	4	0.0130525	STAR;COL1A1;ZFP36L2;FRS2	syndecan binding	2	0.00737205	SEMA5A;HPSE	nuclear body	18	0.00570948	CDKN1A;HMBOX1;SH3BP5;STK4;PRPF4B;AR;RSRC1;MTDH;SPRTN;SKI;RNF111;HBP1;RREB1;CBX5;NCBP3;RBM8A;DAZAP2;PRKAA1
lipid phosphorylation	6	0.00286702	IRS1;MET;AGK;PIK3R2;SMG1;PIP4K2B	regulation of phosphorus metabolic process	9	0.0209627	ACTB;UBE2N;MEN1;ILK;TAOK1;CD109;TGFBR1;MAP3K9;PPM1F	negative regulation of cell death	63	0.0012547	EPHB1;NONO;CCND2;CSNK2A1;CCR5;TMEM109;RNF144B;SOD2;CAV1;CDKN1A;STAMBP;DSTYK;SYVN1;ERC1;GPR37L1;TPT1;CREB1;MYOCD;VEGFA;YWHAZ;CDKN1B;LEF1;SMAD4;MDM4;RPS6KA3;DDR1;RARA;PAX2;BTG2;FKBP8;CFL1;SH3RF1;PRLR;MDM2;XIAP;PDE12;UNC5B;ZNF268;MNT;PSME3;EEF2K;GRINA;YME1L1;TNFSF14;XRCC2;NTSR1;UFM1;AKT2;PLAC8;TP53;BAG1;TGFBR1;PIK3R1;HYPK;SEMA5A;KDM2B;REL;TNFAIP8;PPIF;WNK3;MPZ;PAFAH2;DHCR24	positive regulation of NIK/NF-kappaB signaling	3	0.0130637	RHOA;AGO1;NFAT5	regulation of purine nucleotide biosynthetic process	6	0.00739109	PDK1;ARNT;PDP2;PFKFB3;ENTPD5;PFKFB2	response to cytokine	24	0.00577722	HMGB1;SOD2;CAV1;CDKN1A;IRAK4;POU2F1;MTHFR;TMEM189-UBE2V1;ETV3;MAPK13;ETS1;LMNB1;LIMS1;REL;FER;SKIL;PADI2;PPIA;IL6R;COL1A1;IFNAR2;ZFP36L2;OCLN;SOX2
kinase activity	19	0.00287263	IRS1;MET;CDK6;AGK;RPS6KA5;CCNE2;PDXK;AKAP13;MAPKAPK2;GNE;PIK3R2;MAP4K2;STK11;SYK;PHKG2;SMG1;PIP4K2B;NEK9;GSK3B	regulation of actin filament bundle assembly	2	0.0212766	TGFBR1;PPM1F	regulation of transferase activity	60	0.00125583	CCND2;PABPN1;MAP3K9;HACD3;HMGB1;CAV1;CDKN1A;DSTYK;MAPK14;PAK3;PTK6;IL6R;MYOCD;VEGFA;ERRFI1;OXSR1;CDKN1B;CCNE2;VAV3;SDC4;DUSP9;UBE2S;NEK4;SESN2;GNG3;PROX1;PRLR;DCUN1D5;MAPKAPK2;DVL1;SPRED1;RAP1A;OSBPL8;STK4;DIRAS2;PTPN2;SYAP1;MAPK1;ZYG11B;UBE2N;MAP4K2;MAPK8IP3;STK11;TP53;S1PR2;SYK;TGFBR1;FEM1B;CCNT1;PIK3R1;PRKAR2A;CERS1;IL23R;SAMD5;EFNA5;TAOK1;NCAPG2;CAB39;DUSP14;SNX9	regulation of neuron projection regeneration	2	0.0130821	NTRK3;EPHA4	positive regulation of B cell activation	6	0.00739109	TIRAP;NFATC2;BTK;BCL6;RIF1;GPR183	response to reactive oxygen species	8	0.00580296	SOD2;MAPK13;FXN;ETS1;SESN3;FER;COL1A1;PRKAA1
cellular macromolecule catabolic process	23	0.00293239	MYLIP;OPHN1;HMGB1;CAV1;CNOT4;PPP1R11;FXR1;TNRC6B;MAPKAPK2;SYNCRIP;PSME3;DDX6;BTG2;RNF216;LARP1;CNOT6L;TNRC6A;SMG1;TP53INP2;DIS3L;RBM8A;USP7;GSK3B	cell cycle arrest	3	0.0213776	ILK;TGFBR1;JMY	positive regulation of developmental process	79	0.00128314	EPHB1;CDH5;ABL2;IL5;RAB21;METRNL;HMGB1;SOD2;FBXW8;MAPK14;PAK3;CYBB;GPR37L1;THBS2;CRTC1;TRIOBP;CREB1;PTK6;IL6R;RFX3;MYOCD;VEGFA;REST;NLGN2;NSD2;LEF1;SMAD4;ADD1;RPS6KA3;RARA;WNT3;PAX2;AGO2;CALR;NTN1;CCL11;PROX1;PLCG1;CRB2;FGF9;BASP1;CAPRIN1;SRF;DVL1;ZNF268;RAP1A;FAM210B;STK4;ITGA3;EEF2K;LIMS1;GDI1;SYAP1;IL2RA;HEYL;CREB3L2;ADGRL1;STK11;TBXA2R;TNFSF14;ACVR2A;XRCC2;S1PR2;SYK;TGFBR1;ZBTB16;HPSE;BMPR2;M…	Apoptosis	4	0.0133799	PIK3R2;MCL1;CYCS;CASP2	protein serine/threonine phosphatase activity	6	0.00739109	PDP2;CYCS;PPM1K;MTMR3;CDC14B;PPM1L	neuron projection	27	0.00588243	OPHN1;SLC38A2;RAB21;P2RX3;HMGB1;SAMD4A;SHISA9;PALM;PLCB4;ADAM22;ORAI2;CD3E;RAP1GAP2;MINK1;AGO2;SYT7;MYO10;NCMAP;FSTL3;NTRK3;GLUL;KCNB1;RBM8A;EPHA4;PRKAA1;SV2C;IGF1R
reproductive structure development	12	0.00294782	FNDC3A;BCL2;MYOCD;LEF1;SMAD4;STC2;BASP1;LDOC1;STK11;VASH1;ADAM19;HMGCS1	contractile actin filament bundle assembly	2	0.0217156	TGFBR1;PPM1F	response to hypoxia	25	0.00129082	P2RX3;CAV1;STC1;CYBB;PDK3;CREB1;MYOCD;VEGFA;PML;REST;CDKN1B;SMAD4;MDM4;LDHA;SLC29A1;RORA;MDM2;SRF;ITGA2;MTHFR;SUV39H1;SLC11A2;TP53;AHCY;HIF1AN	regulation of organelle assembly	5	0.0134692	ULK1;RHOA;PIKFYVE;NTRK3;PRKAA1	regulation of fatty acid beta-oxidation	3	0.00751805	IRS1;LONP2;PLIN5	chromatin binding	14	0.00604285	ELK4;REST;ESR1;SUV39H1;AR;DNMT3B;SNAI2;GTF2H1;REL;SKIL;HMGA2;CBX5;SAP30L;PRKAA1
skeletal muscle organ development	7	0.00296766	CAV1;BCL2;MYOCD;MYH14;BASP1;BTG2;HEYL	stress fiber assembly	2	0.0217156	TGFBR1;PPM1F	regulation of intracellular transport	32	0.00129311	RAB21;VAMP2;VAMP1;MAPK14;UHMK1;SUFU;PPP1R12A;HPS4;RAB11B;MDM2;DVL1;RAP1A;YOD1;SAR1B;WWC1;TARDBP;GDI1;UBE2G2;MAPK1;CAMK2A;SAR1A;BCAS3;AKT2;TP53;SYK;STX1B;PIK3R1;MIEF1;CD84;XPO5;EHD1;VAMP8	positive regulation of cell death	10	0.0135217	FNIP1;MCL1;CYCS;RHOA;TXNIP;SKIL;NTRK3;PPM1F;JMY;CASP2	regulation of phosphate metabolic process	54	0.00759111	IRS1;PDK1;MAP3K2;HMGB1;MAVS;FAM83D;CDK9;BMPR2;TIRAP;EEF2K;BMP7;ENSA;ARNT;PDP2;CRK;DBF4;SYAP1;IL6R;F2RL1;DSTYK;ATG14;PRKAR2A;FGFR1;SAMD5;LDLR;PEA15;GSK3B;CD109;FKBP1A;PPP1R3B;CBL;IKBKG;PFKFB3;GPRC5A;GNAI2;MTMR3;TGFBR1;PPP1R26;CAB39;MAP3K9;ENTPD5;STK4;TYRO3;ACVR1B;GPR183;LAMTOR1;SOCS7;MTMR9;WNK3;MAPK1;PFKFB2;PPP1R14C;NPNT;MLLT1	regulation of cell migration	19	0.00608348	MGAT5;HMGB1;SOD2;CAV1;MINK1;AGO2;ETS1;CD151;SNAI2;FER;NTRK3;PADI2;IL6R;GLUL;RREB1;COL1A1;PPM1F;C5orf30;IGF1R
positive regulation of organelle organization	15	0.00299109	MET;BCL2;GMFB;MOAP1;RPS6KA5;SMAD4;SYT7;PHF19;ACTR3B;MIEF1;CNOT6L;SDC4;PIP4K2B;ANK1;GSK3B	regulation of cyclin-dependent protein serine/threonine kinase activity	2	0.0217156	ACTB;MEN1	negative regulation of cellular amide metabolic process	15	0.00129674	SAMD4A;CELF4;IGF2BP1;FXR1;RARA;AGO2;BTG2;CNOT6L;SESN2;CALR;CAPRIN1;UNK;CELF1;METTL14;LARP1	mRNA metabolic process	11	0.0139895	TNPO1;SF3A3;TNRC6B;TNRC6C;AGO1;SRSF7;NCBP3;RBM8A;ZFP36L2;MBNL3;QKI	regulation of phosphorus metabolic process	54	0.00776546	IRS1;PDK1;MAP3K2;HMGB1;MAVS;FAM83D;CDK9;BMPR2;TIRAP;EEF2K;BMP7;ENSA;ARNT;PDP2;CRK;DBF4;SYAP1;IL6R;F2RL1;DSTYK;ATG14;PRKAR2A;FGFR1;SAMD5;LDLR;PEA15;GSK3B;CD109;FKBP1A;PPP1R3B;CBL;IKBKG;PFKFB3;GPRC5A;GNAI2;MTMR3;TGFBR1;PPP1R26;CAB39;MAP3K9;ENTPD5;STK4;TYRO3;ACVR1B;GPR183;LAMTOR1;SOCS7;MTMR9;WNK3;MAPK1;PFKFB2;PPP1R14C;NPNT;MLLT1	heme metabolic process	3	0.00612342	FXN;COX10;IBA57
endocrine system development	6	0.00310019	HNF4A;CDK6;IL6R;RFX3;SMAD2;GSK3B	regulation of protein localization to plasma membrane	2	0.0217156	ACTB;AP2M1	neutrophil activation	36	0.00134569	SURF4;CD55;HMGB1;VAMP2;NFAM1;MAPK14;CYBB;PPIA;SIGLEC14;PTGES2;PDXK;RAB7A;RAB5C;RAB5B;PKP1;GM2A;RAP1A;ADA2;MAGT1;FLG2;MAPK1;NFASC;RAB10;COMMD9;TSPAN14;PLAC8;SYK;QSOX1;HPSE;PGAM1;MLEC;METTL7A;CD68;CAB39;VAMP8;PAFAH1B2	alternative mRNA splicing, via spliceosome	3	0.0140469	SRSF7;RBM8A;MBNL3	regulation of chemotaxis	11	0.00776755	HMGB1;BMPR2;USP14;TIRAP;SEMA3E;IL6R;SEMA5A;F2RL1;FGFR1;EFNB2;GPR183	lens fiber cell differentiation	3	0.00612342	SKIL;NTRK3;FRS2
Autophagy	6	0.00310019	IRS1;HMGB1;BCL2;PIK3R2;STK11;TP53INP2	protein acetyltransferase complex	2	0.0217156	ACTB;BRPF1	chordate embryonic development	42	0.00134958	TM4SF1;FBXW8;VEGFA;GRB2;SUFU;NDST1;LEF1;SMAD4;ADD1;SDC4;RARA;PAX2;FKBP8;CFL1;PROX1;PLCG1;CRB2;FGF9;RRP7A;BHLHE40;SRF;DVL1;HES2;STK4;SENP2;WNT9B;MTHFR;ECE1;MAFF;MAPK1;ZFP14;FOSL1;ACVR2A;XRCC2;MTHFD1;RPL7L1;TGFBR1;BMPR2;VASH1;KDM2B;NCAPG2;MBNL1	regulation of protein transport	10	0.0141885	FFAR4;PIK3R2;ARF1;PTPN14;ATG13;INSIG1;KCNB1;PPM1F;SEC16A;PRKAA1	regulation of nucleotide biosynthetic process	6	0.00787392	PDK1;ARNT;PDP2;PFKFB3;ENTPD5;PFKFB2	miRNA binding	3	0.00612342	AGO3;AGO2;SOX2
developmental process involved in reproduction	16	0.00310199	FNDC3A;HNF4A;BCL2;MYOCD;CELF4;LEF1;SMAD4;STC2;CBX2;BASP1;DDX6;LDOC1;STK11;VASH1;ADAM19;HMGCS1	acetyltransferase complex	2	0.0217156	ACTB;BRPF1	mitotic G1 DNA damage checkpoint	9	0.00136134	CDKN1A;PML;CDKN1B;MDM4;BTG2;CNOT6L;MDM2;TFDP2;TP53	regulation of cellular localization	12	0.0143392	TRIM58;PIK3R2;ARF1;GNAI1;PTPN14;TRIM67;ATG13;INSIG1;KCNB1;PPM1F;SEC16A;PRKAA1	toll-like receptor 4 signaling pathway	4	0.00807967	HMGB1;TIRAP;F2RL1;LILRA2	cellular response to ketone	5	0.00626506	ACACA;AR;NDOR1;DNMT3B;PRKAA1
locomotion	32	0.00310233	OPHN1;HMGB1;SOD2;CAV1;PPIA;MET;BCL2;CDK6;IL6R;ANKS1A;RFX3;MYOCD;LAMC1;RPS6KA5;LEF1;SMAD4;VPS37B;SEMA4G;CCR5;SATB2;ITGA3;CCL22;NFASC;PIK3R2;SYK;VASH1;EFNA5;EMX2;SDC4;SRCIN1;TCAF1;SPN	carbohydrate mediated signaling	1	0.0220239	UBTF	mitotic G1/S transition checkpoint	9	0.00136134	CDKN1A;PML;CDKN1B;MDM4;BTG2;CNOT6L;MDM2;TFDP2;TP53	positive regulation of mRNA metabolic process	3	0.0145538	TNRC6B;TNRC6C;ZFP36L2	ribonucleoside diphosphate metabolic process	7	0.00808618	ARNT;DHTKD1;GPI;PFKFB3;ENTPD5;PGM2L1;PFKFB2	somatic stem cell population maintenance	4	0.00635376	WNT9B;SKI;ZFP36L2;SOX2
reproductive system development	12	0.00311983	FNDC3A;BCL2;MYOCD;LEF1;SMAD4;STC2;BASP1;LDOC1;STK11;VASH1;ADAM19;HMGCS1	regulation of cardiac muscle adaptation	1	0.0220239	TRPC3	axon extension	13	0.00137355	ULK2;RAB21;VEGFA;DPYSL2;WNT3;NTN1;SRF;DVL1;GDI1;BMPR2;SEMA5A;PLXNA3;RAPH1	nuclear speck	7	0.0148659	SF3A3;NR3C1;CRY2;NCBP3;RBM8A;DAZAP2;PRKAA1	pattern recognition receptor signaling pathway	10	0.00832953	HMGB1;RPS6KA3;TSPAN6;TIRAP;IRAK4;F2RL1;BTK;IKBKG;LILRA2;TYRO3	FoxO signaling pathway	6	0.00638008	SOD2;CDKN1A;STK4;MAPK13;PRKAA1;IGF1R
cellular component maintenance	4	0.00325146	OPHN1;MYOCD;ITGA3;MTHFR	regulation of cardiac muscle hypertrophy in response to stress	1	0.0220239	TRPC3	cellular response to stress	106	0.0014129	EPHB1;POLD3;NONO;MAP3K9;CREBRF;HACD3;TMEM109;HMGB1;SOD2;CAV1;CDKN1A;CBX5;SYVN1;MAPK14;STC1;GOSR2;PAK3;CYBB;GPR37L1;TPT1;PDK3;VEGFA;WDR33;IGF2BP1;ERRFI1;PML;GRB2;DYRK2;CDK6;OXSR1;NSD2;CDKN1B;VAV3;MDM4;KLHDC10;ADD1;RPS6KA3;PAX2;DUSP9;BTG2;NEK4;CNOT6L;SESN2;CALR;SH3RF1;SLC29A1;RORA;RASGRF1;BBC3;MDM2;XIAP;PIK3C2B;MAPKAPK2;SRF;SPRED1;YOD1;ACTR5;STK4;FANCC;MCM8;UGGT1;POLD4;PTPN2;WNT9B;KAT7;TARDBP;SUV39…	regulation of astrocyte differentiation	2	0.0150834	NTRK3;EPHA4	regulation of neurotransmitter receptor activity	5	0.00834103	NPTXR;SHISA9;CACNG7;NLGN2;NETO2	regulation of mRNA metabolic process	9	0.00648117	SAMD4A;MBNL3;REST;AGO2;SERBP1;CPSF7;RBM8A;ZFP36L2;CNOT6L
columnar/cuboidal epithelial cell development	4	0.00325146	HNF4A;CDK6;RFX3;GSK3B	chromatin-mediated maintenance of transcription	1	0.0220239	SMARCD1	negative regulation of cysteine-type endopeptidase activity	11	0.00142258	CSNK2A1;VEGFA;LEF1;RPS6KA3;PAX2;SH3RF1;MDM2;XIAP;TNFSF14;TNFAIP8;DHCR24	organellar small ribosomal subunit	2	0.0150834	MRPS18B;MRPS21	positive regulation of binding	10	0.00864569	HMGB1;CDK9;TIRAP;SYAP1;GSK3B;FKBP1A;ADD2;STK4;HMBOX1;RAN	regulation of response to stress	28	0.006486	METRNL;HMGB1;SOD2;CAV1;CDKN1A;TLR7;IRAK4;YOD1;ESR1;TAOK1;TMEM189-UBE2V1;MINK1;GRINA;MAPK13;ETS1;SNAI2;SESN3;BID;SKIL;INSIG1;NTRK3;HMGA2;RREB1;IFNAR2;EPHA4;TRAF3IP1;C5orf30;IGF1R
regulation of gene silencing by miRNA	4	0.00325146	FXR1;MYCN;POLR2E;TNRC6A	germ cell migration	1	0.0220239	TGFBR1	Longevity regulating pathway	11	0.00142258	SOD2;CREB1;SESN2;ADCY6;PRKAB1;ADCY2;CREB3L2;STK11;AKT2;TP53;PIK3R1	mitochondrial small ribosomal subunit	2	0.0150834	MRPS18B;MRPS21	positive regulation of kinase activity	22	0.00884879	IRS1;MAP3K2;HMGB1;TIRAP;CRK;DBF4;SYAP1;IL6R;DSTYK;ATG14;PRKAR2A;FGFR1;SAMD5;PEA15;IKBKG;GPRC5A;TGFBR1;CAB39;MAP3K9;STK4;MAPK1;PFKFB2	negative regulation of activin receptor signaling pathway	2	0.00656901	FSTL3;SKI
negative regulation of phosphoprotein phosphatase activity	4	0.00325146	PPP1R1A;PPP1R11;ARPP19;GSK3B	eye pigmentation	1	0.0220239	OCA2	regulation of phosphorylation	88	0.00142772	EPHB1;CCND2;MAP3K9;IL5;HACD3;HMGB1;CAV1;CTDSPL;CDKN1A;DSTYK;MAPK14;PAK3;GPR37L1;PTK6;IL6R;MYOCD;VEGFA;ERRFI1;PML;GRB2;NDST1;OXSR1;CDKN1B;RPS6KA5;CCNE2;SMAD4;VAV3;KLHDC10;SDC4;DDR1;IGFBP4;DUSP9;NEK4;SESN2;FKBP8;GNG3;SH3RF1;CCL11;PROX1;PRLR;FGF9;MAPKAPK2;PDE12;DHX33;DVL1;SPRED1;RAP1A;PPP1R14C;OSBPL8;WWC1;STK4;DIRAS2;SENP2;PTPN2;WNT9B;TARDBP;EEF2K;CCL22;SYAP1;MAPK1;UBE2N;RPS6KA4;MAP4K2;MAPK8IP3;STK1…	intracellular steroid hormone receptor signaling pathway	4	0.0150951	NR3C1;CRY2;RHOA;NCOR2	Fc receptor signaling pathway	8	0.00887256	NFATC2;CRK;WIPF3;WIPF2;BTK;LIMK1;IKBKG;MAPK1	gas homeostasis	2	0.00656901	SOD2;CAV1
regulation of type B pancreatic cell development	2	0.00329641	RFX3;GSK3B	coronary artery morphogenesis	1	0.0220239	TGFBR1	cell adhesion molecule binding	35	0.00143871	DDX6;CDH5;HMGB1;UTRN;LGALS8;ERC1;ESYT2;EIF4H;YWHAZ;NLGN2;LDHA;ADD1;BZW1;LASP1;CALR;HDLBP;RAB11B;PKP1;PARVA;ITGA2;OLA1;ZC3H15;PTPN2;ITGA3;SERBP1;RAB10;ADGRL1;MPRIP;ZC3HAV1;GAPVD1;S1PR2;SYK;LARP1;EHD1;SNX9	response to fibroblast growth factor	4	0.015454	STAR;COL1A1;ZFP36L2;FRS2	regulation of cofactor metabolic process	6	0.00890701	PDK1;ARNT;PDP2;PFKFB3;ENTPD5;PFKFB2	prostate gland growth	2	0.00656901	ESR1;AR
multi-organism membrane organization	2	0.00329641	PPIA;CCR5	positive regulation of cell cycle checkpoint	1	0.0220239	GEN1	neutrophil mediated immunity	36	0.0014431	SURF4;CD55;HMGB1;VAMP2;NFAM1;MAPK14;CYBB;PPIA;SIGLEC14;PTGES2;PDXK;RAB7A;RAB5C;RAB5B;PKP1;GM2A;RAP1A;ADA2;MAGT1;FLG2;MAPK1;NFASC;RAB10;COMMD9;TSPAN14;PLAC8;SYK;QSOX1;HPSE;PGAM1;MLEC;METTL7A;CD68;CAB39;VAMP8;PAFAH1B2	negative regulation of lipid metabolic process	3	0.0155986	ORMDL2;INSIG1;PRKAA1	phagocytosis	12	0.00894396	HMGB1;RAB27A;MESD;CRK;F2RL1;WIPF3;WIPF2;LIMK1;CDC42SE1;GATA2;TYRO3;MAPK1	negative regulation of protein exit from endoplasmic reticulum	2	0.00656901	YOD1;INSIG1
early phagosome	2	0.00329641	SYT7;SYK	monoubiquitinated protein deubiquitination	1	0.0220239	USP15	reproductive structure development	32	0.00144965	ESR1;FBXW8;MAPK14;STC1;SMARCC1;MYOCD;VEGFA;PGR;GRB2;CDKN1B;LEF1;SMAD4;RARA;FGF9;BASP1;STK4;SENP2;WNT9B;LDOC1;MAPK1;FOSL1;STK11;ACVR2A;FSTL3;TGFBR1;FEM1B;FANCA;BMPR2;VASH1;BAK1;MC2R;ADAM19	nuclear membrane	6	0.0156095	TNPO1;TOR1AIP2;SCRN1;DCTN5;TMEM43;AKIRIN1	acyl-CoA metabolic process	7	0.0089758	PDK1;PDP2;THEM4;ACSL6;ELOVL5;HMGCS1;SCD	siRNA binding	2	0.00656901	TLR7;AGO2
hormone transport	10	0.00332949	IRS1;HNF4A;RFX3;REST;SMAD4;SYT7;RAB11B;SMAD2;PTPRN2;EFNA5	aromatic amino acid transport	1	0.0220239	OCA2	secretory granule	54	0.00147086	SURF4;CD55;SERPINA4;HMGB1;RPH3AL;CAV1;VAMP2;VAMP1;NFAM1;MAPK14;BACE2;CYBB;THBS2;PPIA;SIGLEC14;VEGFA;PHACTR2;PTGES2;PDXK;HPS4;RAB7A;RPH3A;CALR;RAB5C;RAB5B;PKP1;GM2A;RAP1A;ADA2;OLA1;ECE1;MAGT1;RACGAP1;FLG2;MAPK1;NFASC;RAB10;COMMD9;TSPAN14;TBXA2R;KLK2;PLAC8;FSTL3;ABHD2;QSOX1;HPSE;PGAM1;MLEC;METTL7A;CD68;CAB39;VAMP8;TMED10;PAFAH1B2	positive regulation of cytoskeleton organization	5	0.0156126	ARF1;RHOA;NTRK3;PPM1F;JMY	thioester metabolic process	7	0.0089758	PDK1;PDP2;THEM4;ACSL6;ELOVL5;HMGCS1;SCD	protein kinase regulator activity	7	0.00659414	CAB39;HMGB1;CDKN1A;SH3BP5;TAOK1;STK4;DAZAP2
regulation of cellular carbohydrate metabolic process	6	0.00347614	IRS1;HMGB1;ARPP19;IGFBP4;PHKG2;GSK3B	RNA polymerase I preinitiation complex assembly	1	0.0220239	UBTF	SNAP receptor activity	6	0.0014758	GOSR2;STX2;STX1B;STX16;BET1L;STX6	regulation of mRNA catabolic process	4	0.0158182	TNPO1;TNRC6B;TNRC6C;ZFP36L2	positive regulation of leukocyte activation	14	0.00903295	MYB;HMGB1;TIRAP;NFATC2;IL6R;CD1D;F2RL1;TMIGD2;EFNB2;BTK;BCL6;GATA2;RIF1;GPR183	positive regulation of biosynthetic process	37	0.0066344	E2F6;TCERG1;YTHDF1;HMGB1;SAMD4A;MICAL2;FOXK2;HMBOX1;ZBED1;TLR7;POU2F1;ELK4;REST;ESR1;NR2C2;ARPP19;AR;CD3E;TMEM189-UBE2V1;AGO2;MTDH;ETS1;NFIX;FSTL3;GTF2H1;SKI;REL;INSIG1;PADI2;RNF111;HMGA2;RREB1;COL1A1;JMY;PRKAA1;MTF1;SOX2
protein secretion	14	0.00348616	IRS1;HMGB1;PPIA;HNF4A;PPP1R11;RFX3;REST;SYT7;RAB11B;SMAD2;PTPRN2;SYK;EFNA5;SRCIN1	nuclear lamina	1	0.0220239	SUV39H1	cell aging	12	0.00148157	CDKN1A;MAPK14;PML;CDK6;NEK4;CALR;SRF;MNT;LIMS1;PRELP;TP53;VASH1	positive regulation of erythrocyte differentiation	2	0.0161303	TRIM58;TAL1	positive regulation of lymphocyte proliferation	8	0.00928111	HMGB1;TIRAP;NFATC2;IL6R;CD1D;TMIGD2;BCL6;GPR183	extrinsic apoptotic signaling pathway	8	0.00663689	CAV1;STK4;AR;SNAI2;BID;SKIL;IL6R;CASP2
transferase activity, transferring phosphorus-containing groups	21	0.00359085	IRS1;MET;CDK6;AGK;RPS6KA5;CCNE2;PDXK;AKAP13;PCYT1A;MAPKAPK2;GNE;PIK3R2;MAP4K2;STK11;SYK;PHKG2;POLR2E;SMG1;PIP4K2B;NEK9;GSK3B	ubiquitin conjugating enzyme complex	1	0.0220239	UBE2N	Glucagon signaling pathway	12	0.00148157	CREB1;LDHA;PRKAB1;CAMK2G;CALML3;ADCY2;CREB3L2;CAMK2A;AKT2;ACACA;PHKG2;PGAM1	regulation of intracellular steroid hormone receptor signaling pathway	3	0.0161364	CRY2;RHOA;NCOR2	endocrine system development	8	0.00928111	IL6R;ETS1;GSK3B;ONECUT1;ARID5B;GATA2;TGFBR1;MAPK1	face morphogenesis	3	0.00671769	CRISPLD2;SKI;COL1A1
positive regulation of transforming growth factor beta receptor signaling pathway	3	0.00361596	MYOCD;SMAD4;STK11	structural constituent of postsynapse	1	0.0220239	ACTB	positive regulation of cell development	37	0.00149322	CDH5;ABL2;IL5;RAB21;FBXW8;PAK3;CRTC1;TRIOBP;PTK6;RFX3;VEGFA;REST;ADD1;RARA;WNT3;CALR;NTN1;PROX1;CAPRIN1;SRF;DVL1;RAP1A;ITGA3;EEF2K;LIMS1;GDI1;HEYL;CREB3L2;STK11;XRCC2;S1PR2;BMPR2;MYLK3;SEMA5A;EFNA5;PLXNA3;PLXND1	apoptotic process	21	0.0161449	FNIP1;STAR;NR3C1;FFAR4;MTRNR2L1;MCL1;CYCS;RHOA;TXNIP;TMEM214;SKIL;NTRK3;KCNB1;PPM1F;JMY;DDB1;EPHA4;CASP2;FRS2;PRKAA1;SIAH2	anterior/posterior pattern specification	11	0.00953457	BMPR2;HOXB5;HES2;XRCC2;NKD1;GRSF1;KDM2B;HOXC13;BTG2;TGFBR1;HOXC8	nuclear-transcribed mRNA poly(A) tail shortening	3	0.00671769	SAMD4A;AGO2;CNOT6L
positive regulation of cellular response to transforming growth factor beta stimulus	3	0.00361596	MYOCD;SMAD4;STK11	crossover junction endodeoxyribonuclease activity	1	0.0220239	GEN1	regulation of cell proliferation	91	0.00151923	EPHB1;CCND2;CSNK2A1;ABL2;CD55;IL5;HMGB1;SOD2;CAV1;CDKN1A;STAMBP;ESR1;MAPK14;GPR37L1;NACC1;SKAP2;CREB1;IL6R;MYOCD;VEGFA;PGR;ERRFI1;PML;CDK6;REST;CDKN1B;LAMC1;CCNE2;LEF1;SMAD4;VAV3;MDM4;CD164;SDC4;DDR1;KLF13;RARA;WNT3;PAX2;TOB2;BTG2;CNOT6L;CALR;SH3RF1;NTN1;CCL11;PROX1;PLCG1;S1PR1;FGF9;MDM2;XIAP;NPR1;SRF;ZNF268;MNT;ITGA2;STK4;PTPN2;LIMS1;TIAL1;LDOC1;MAPK1;IL2RA;FOSL1;STK11;IKZF3;AKT2;MCTS1;PEX2;PLAC…	cellular glucose homeostasis	4	0.0161878	STAR;PIK3R2;KCNB1;PRKAA1	positive regulation of locomotion	21	0.00962444	HMGB1;BMPR2;TIRAP;BMP7;CRK;SEMA3E;IL6R;SEMA5A;F2RL1;FGFR1;ETS1;GPI;FAM107A;ONECUT1;FAM83H;GNAI2;GATA2;TGFBR1;ACVR1B;PTP4A1;MAPK1	apoptotic signaling pathway	15	0.00672811	SOD2;CAV1;CDKN1A;STK4;AR;CD3E;GRINA;FXN;SNAI2;BID;SKIL;IL6R;PPM1F;JMY;CASP2
urogenital system development	10	0.00363286	BCL2;MYOCD;SMAD4;BASP1;SMAD2;ITGA3;HEYL;STK11;EMX2;SDC4	Seratrodast	1	0.0220239	TBXA2R	G1 DNA damage checkpoint	9	0.00152519	CDKN1A;PML;CDKN1B;MDM4;BTG2;CNOT6L;MDM2;TFDP2;TP53	intracellular protein transport	14	0.0165656	TNPO1;ZDHHC18;PIK3R2;VPS13D;ARF1;SRSF7;TXNIP;PTPN14;ATG13;INSIG1;KCNB1;RBM8A;SEC16A;PRKAA1	positive regulation of mononuclear cell proliferation	8	0.00970352	HMGB1;TIRAP;NFATC2;IL6R;CD1D;TMIGD2;BCL6;GPR183	positive regulation of fat cell differentiation	4	0.00714575	METRNL;STK4;SNAI2;CCDC71L
positive regulation of kinase activity	14	0.0036579	IRS1;HMGB1;IL6R;AKAP13;GNG3;MAPKAPK2;DIRAS2;MAP4K2;STK11;SYK;EFNA5;SDC4;SRCIN1;PEA15	Endocytosis	3	0.0223167	AP2M1;TGFBR1;STAM	negative regulation of myeloid cell differentiation	10	0.0015844	CDK6;KLF13;RARA;TOB2;PTPN2;FSTL3;ZBTB16;PIK3R1;GPR55;NCAPG2	negative regulation of cell death	13	0.016636	FNIP1;STAR;FFAR4;MTRNR2L1;MCL1;RHOA;NTRK3;DDB1;LRPAP1;EPHA4;CASP2;PRKAA1;SIAH2	prostanoid metabolic process	4	0.00983392	PTGS1;PTGES2;ZADH2;ACOX1	regulation of cell proliferation	31	0.00715798	HMGB1;SOD2;CAV1;CDKN1A;IRAK4;REST;ESR1;AGO3;STK4;AR;CD3E;ETV3;FXN;ETS1;SNAI2;SKI;LIMS1;BID;FER;NTRK3;HMGA2;IL6R;GLUL;BTG1;RREB1;FRS2;PRKAA1;CNOT6L;TOB2;SOX2;IGF1R
signal transduction involved in mitotic G1 DNA damage checkpoint	4	0.00370157	CNOT4;MDM4;BTG2;CNOT6L	positive regulation of chromatin organization	2	0.0226049	MYB;UBE2N	Bladder cancer	7	0.00160472	CDKN1A;VEGFA;RPS6KA5;MDM2;MAPK1;TP53;E2F2	aerobic respiration	3	0.0166846	CYCS;COX10;IREB2	prostaglandin metabolic process	4	0.00983392	PTGS1;PTGES2;ZADH2;ACOX1	positive regulation of vasculature development	7	0.00721412	HMGB1;SOD2;AGO2;MTDH;ETS1;HMGA2;BTG1
intracellular signal transduction involved in G1 DNA damage checkpoint	4	0.00370157	CNOT4;MDM4;BTG2;CNOT6L	cellular response to growth factor stimulus	5	0.0228213	USP15;MEN1;ILK;CD109;TGFBR1	erythrocyte homeostasis	13	0.00160651	MAPK14;VEGFA;CDK6;ADD1;KLF13;RPS24;SRF;FAM210B;PTPN2;PKNOX1;ACVR2A;SLC11A2;NCAPG2	ephrin receptor signaling pathway	3	0.0166846	RHOA;NTRK3;EPHA4	aerobic respiration	6	0.0100336	FXN;PANK2;COX20;DHTKD1;CYCS;IDH3A	regulation of lipid biosynthetic process	7	0.00721412	FITM2;ACACA;REST;SAMD8;SNAI2;INSIG1;PRKAA1
regulation of posttranscriptional gene silencing	4	0.00370157	FXR1;MYCN;POLR2E;TNRC6A	positive regulation of molecular function	9	0.022839	UBE2N;MEN1;ILK;TAOK1;TGFBR1;MAP3K9;PPM1F;JMY;ARID5B	reproductive system development	32	0.0016224	ESR1;FBXW8;MAPK14;STC1;SMARCC1;MYOCD;VEGFA;PGR;GRB2;CDKN1B;LEF1;SMAD4;RARA;FGF9;BASP1;STK4;SENP2;WNT9B;LDOC1;MAPK1;FOSL1;STK11;ACVR2A;FSTL3;TGFBR1;FEM1B;FANCA;BMPR2;VASH1;BAK1;MC2R;ADAM19	regulation of myeloid cell differentiation	5	0.0167652	TRIM58;TNRC6B;TNRC6C;TAL1;AGO1	positive regulation of interleukin-6 production	6	0.0100336	HMGB1;MAVS;TIRAP;IL6R;F2RL1;LILRA2	activation of protein kinase activity	10	0.00739494	CAB39;HMGB1;TAOK1;STK4;TMEM189-UBE2V1;MINK1;NTRK3;IL6R;FRS2;PRKAA1
regulation of gene silencing by RNA	4	0.00370157	FXR1;MYCN;POLR2E;TNRC6A	N-methyltransferase activity	2	0.0230552	SUV39H1;MEN1	regulation of cell death	95	0.00162364	EPHB1;NONO;CCND2;CSNK2A1;MAP3K9;CCR5;TMEM109;RNF144B;HMGB1;SOD2;CAV1;CDKN1A;STAMBP;PPP2R1B;ESR1;DSTYK;SYVN1;ERC1;PAK3;GPR37L1;TPT1;CREB1;MYOCD;VEGFA;PML;YWHAZ;REST;CDKN1B;LEF1;SMAD4;VAV3;MDM4;LDHA;RPS6KA3;PLAGL2;PTPA;DDR1;RARA;RTKN;PAX2;BTG2;CALR;FKBP8;CFL1;SH3RF1;PRLR;GRIN2B;PLCG1;BBC3;HPR;MDM2;XIAP;PDE12;UNC5B;ZNF268;MNT;STK4;PTPN2;PSME3;TARDBP;ELK1;EEF2K;TFDP2;GRINA;YME1L1;SERBP1;FOSL1;CAMK2A;…	phosphatidylinositol biosynthetic process	4	0.0169432	PIK3R2;ARF1;PIKFYVE;FRS2	mitochondrion morphogenesis	3	0.0101544	PNPT1;PANK2;COL4A3BP	mitotic DNA damage checkpoint	5	0.00746418	CDKN1A;TAOK1;HMGA2;CASP2;CNOT6L
alpha-beta T cell activation	6	0.00374496	HMGB1;BCL2;IL6R;LEF1;SYK;SPN	signal transduction by protein phosphorylation	6	0.0233717	UBE2N;MEN1;ILK;TAOK1;TGFBR1;MAP3K9	neuron development	66	0.00164539	TSKU;EPHB1;ABL2;ULK2;MYLIP;RNF165;RAB21;HMGB1;FBXW8;UHMK1;PAK3;CRTC1;TRIOBP;CREB1;PTK6;VEGFA;GRB2;BLOC1S3;YWHAZ;RPS6KA5;SMAD4;UST;ANKS1A;DPYSL2;SDC4;DDR1;WNT3;PAX2;BTG2;CFL1;NTN1;PLCG1;RASGRF1;MDM2;ADCY6;CAPRIN1;UNC5B;SRF;DVL1;UNK;RAP1A;ITGA3;EEF2K;GDI1;EFNA3;MAPK1;NFASC;RAB10;CREB3L2;CAMK2A;MAPK8IP3;STK11;SLC11A2;MYPN;CABP4;STX1B;PIK3R1;BMPR2;NYAP2;SEMA5A;EFNA5;PLXNA3;EHD1;NPTXR;PLXND1;RAPH1	peptidyl-serine modification	6	0.0170475	FNIP1;ULK1;GALNT2;NTRK3;PPM1F;PRKAA1	negative regulation of neural precursor cell proliferation	3	0.0101544	KDM2B;BTG2;GATA2	regulation of transferase activity	21	0.00746595	CAB39;HMGB1;CAV1;CDKN1A;HMBOX1;SH3BP5;TAOK1;STK4;TMEM189-UBE2V1;MINK1;GTF2H1;NTRK3;SOCS7;HMGA2;IL6R;PPM1F;DAZAP2;EPHA4;FRS2;PRKAA1;IGF1R
protein phosphatase binding	6	0.00374496	MET;PPP1R11;BCL2;ARPP19;PIK3R2;ANK1	regulation of cyclin-dependent protein kinase activity	2	0.0235092	ACTB;MEN1	developmental growth involved in morphogenesis	20	0.00164808	ULK2;RAB21;ESR1;VEGFA;DPYSL2;DDR1;WNT3;NTN1;CCL11;S1PR1;SRF;DVL1;FMN1;GDI1;STK11;BMPR2;SEMA5A;EFNA5;PLXNA3;RAPH1	heme metabolic process	2	0.0172074	COX10;IREB2	positive regulation of axon extension involved in axon guidance	2	0.0101653	BMPR2;SEMA5A	positive regulation of developmental process	27	0.00760335	RAB21;METRNL;HMGB1;SOD2;REST;STK4;AR;CD3E;AGO2;MTDH;DNMT3B;ETS1;SNAI2;NCMAP;LIMS1;SKIL;NTRK3;HMGA2;IL6R;BTG1;RREB1;CCDC71L;COL1A1;EPHA4;FRS2;PRKAA1;SOX2
neuron part	31	0.0038187	OPHN1;HMGB1;PALM;ATXN1L;GRM7;ANKS1A;FXR1;SYT7;NPTXR;SLC6A17;MYH14;RPH3A;GNG3;RAB11B;RAB5B;BASP1;PTPRN2;ITGA3;ELK1;PRRT2;GDI1;NFASC;CABP4;STX6;SHISA9;SRCIN1;RBM8A;CBX6;FRMPD4;ANK1;GSK3B	regulation of actin filament organization	3	0.0237673	TGFBR1;PPM1F;JMY	granulocyte activation	36	0.00165652	SURF4;CD55;HMGB1;VAMP2;NFAM1;MAPK14;CYBB;PPIA;SIGLEC14;PTGES2;PDXK;RAB7A;RAB5C;RAB5B;PKP1;GM2A;RAP1A;ADA2;MAGT1;FLG2;MAPK1;NFASC;RAB10;COMMD9;TSPAN14;PLAC8;SYK;QSOX1;HPSE;PGAM1;MLEC;METTL7A;CD68;CAB39;VAMP8;PAFAH1B2	receptor antagonist activity	2	0.0172074	MTRNR2L1;LRPAP1	positive regulation of toll-like receptor 3 signaling pathway	2	0.0101653	TIRAP;F2RL1	regulation of cellular catabolic process	18	0.00773215	OPHN1;RNF144B;HMGB1;SAMD4A;CAV1;YOD1;PIP4K2C;AGO2;SERBP1;DDA1;MTDH;SESN3;PIKFYVE;TRIM65;ZFP36L2;EPHA4;PRKAA1;CNOT6L
regulation of cell-cell adhesion	11	0.00383488	HMGB1;CAV1;IL6R;LEF1;SYK;PAG1;EFNA5;ADAM19;SDC4;SPN;IL2RA	positive regulation of growth	3	0.0237673	ILK;TGFBR1;PPM1F	negative regulation of transcription, DNA-templated	71	0.00166135	NONO;KCNIP3;GATAD2A;HMGB1;ZNF417;CAV1;ESR1;CBX5;DKK3;NACC1;CREB1;RFX3;MYOCD;VEGFA;KDM5C;E2F5;PML;SUFU;HIC2;REST;NSD2;CDKN1B;RPS6KA5;LEF1;SMAD4;MDM4;RARA;CBX2;PAX2;BTG2;CALR;PROX1;FGF9;MDM2;BASP1;BHLHE40;SRF;HES2;ZNF268;MNT;WWC1;HOXC8;NFX1;PTPN2;KAT7;SUV39H1;TSHZ2;LIMS1;TFDP2;ZNF154;ZNF485;CC2D1B;HEYL;PEX2;CNBP;TP53;MIER3;E2F2;ZBTB16;NFIC;SOX7;HIF1AN;ATF7IP;KDM2B;REL;BACH2;FOXE1;GLIS3;LCOR;POU2F1;…	dynein intermediate chain binding	2	0.0172074	TRIM58;HOOK3	negative regulation of nuclease activity	2	0.0101653	DFFA;TERF1	mRNA metabolic process	18	0.00783179	SF3B3;SAMD4A;MBNL3;REST;AGO3;PRPF4B;DDX6;RSRC1;SNU13;AGO2;SERBP1;CPSF7;GTF2H1;NCBP3;RBM8A;ZFP36L2;QKI;CNOT6L
signal transduction involved in mitotic cell cycle checkpoint	4	0.0039417	CNOT4;MDM4;BTG2;CNOT6L	protein localization to plasma membrane	3	0.024014	ACTB;RAB15;AP2M1	regulation of catabolic process	56	0.00170317	CSNK2A1;ABL2;ULK2;MYLIP;RNF144B;HMGB1;SF3B3;SAMD4A;CAV1;BSCL2;FBXW8;MAPK14;DEPP1;CARHSP1;SMARCC1;IGF2BP1;PML;SUFU;YWHAZ;FXR1;CDKN1B;MDM4;RAB7A;AGO2;BTG2;CNOT6L;SESN2;DDA1;ATP6V1A;EXOC7;MDM2;GTPBP1;PKP1;MAPKAPK2;PDE12;DVL1;YOD1;PSME3;TARDBP;UBE2G2;OPTN;SERBP1;CISD2;STK11;ZC3HAV1;PSMF1;AKT2;PHKG2;QSOX1;RRAGD;METTL14;LARP1;PGAM1;USP14;SNX9;PAFAH1B2	regulation of protein targeting	3	0.0172431	ATG13;KCNB1;PRKAA1	activin receptor complex	2	0.0101653	TGFBR1;ACVR1B	transferase complex	18	0.00793246	CAB39;E2F6;RNF144B;CDKN1A;REST;POLD3;TMEM189-UBE2V1;DDA1;JADE2;GTF2H1;SOCS7;CBX5;TRPC4AP;DCAF16;DDB1;PRKAA1;CHML;IGF1R
signal transduction involved in mitotic DNA damage checkpoint	4	0.0039417	CNOT4;MDM4;BTG2;CNOT6L	proteolysis	9	0.0240222	USP15;ACTB;UBE2Z;UBE2N;DDA1;CD109;TGFBR1;PPM1F;STAM	cellular senescence	9	0.0017045	CDKN1A;MAPK14;PML;CDK6;NEK4;CALR;SRF;TP53;VASH1	positive regulation of axonogenesis	3	0.0172431	RHOA;SKIL;NTRK3	transforming growth factor beta receptor activity, type I	2	0.0101653	TGFBR1;ACVR1B	histone-serine phosphorylation	2	0.0079629	HMGA2;PRKAA1
signal transduction involved in mitotic DNA integrity checkpoint	4	0.0039417	CNOT4;MDM4;BTG2;CNOT6L	postsynaptic cytoskeleton organization	1	0.0244415	ACTB	placenta development	15	0.00170743	FBXW8;MAPK14;STC1;GRB2;CDKN1B;LEF1;STK4;SENP2;LDOC1;MAPK1;FOSL1;BMPR2;VASH1;MC2R;ADAM19	positive regulation of cell morphogenesis involved in differentiation	4	0.0173291	RHOA;SKIL;NTRK3;EPHA4	activin-activated receptor activity	2	0.0101653	BMPR2;ACVR1B	prostate glandular acinus development	2	0.0079629	ESR1;FRS2
Endometrial cancer	4	0.0039417	LEF1;ELK1;PIK3R2;GSK3B	regulation of histone ubiquitination	1	0.0244415	UBE2N	regulation of protein phosphorylation	82	0.00170868	EPHB1;CCND2;MAP3K9;IL5;HACD3;HMGB1;CAV1;CTDSPL;CDKN1A;DSTYK;MAPK14;PAK3;GPR37L1;PTK6;IL6R;MYOCD;VEGFA;ERRFI1;PML;GRB2;NDST1;OXSR1;CDKN1B;RPS6KA5;CCNE2;SMAD4;KLHDC10;SDC4;DDR1;IGFBP4;DUSP9;NEK4;SESN2;FKBP8;GNG3;SH3RF1;CCL11;PROX1;PRLR;FGF9;MAPKAPK2;DHX33;DVL1;SPRED1;RAP1A;OSBPL8;WWC1;STK4;DIRAS2;SENP2;PTPN2;WNT9B;TARDBP;EEF2K;CCL22;SYAP1;MAPK1;UBE2N;RPS6KA4;MAP4K2;MAPK8IP3;STK11;ACVR2A;AKT2;TP53;S…	mRNA transport	4	0.0173291	SRSF7;NCBP3;RBM8A;QKI	clathrin heavy chain binding	2	0.0101653	LDLR;GPR107	micro-ribonucleoprotein complex	2	0.0079629	AGO3;AGO2
positive regulation of cellular component organization	24	0.00394354	CAV1;PALM;MET;BCL2;GMFB;MOAP1;RPS6KA5;SMAD4;SYT7;PHF19;ACTR3B;GTF2H5;ITGA3;GDI1;STK11;SYK;MIEF1;EFNA5;CNOT6L;SDC4;PIP4K2B;FRMPD4;ANK1;GSK3B	fibroblast activation	1	0.0244415	MYB	regulation of protein kinase activity	50	0.00173295	CCND2;MAP3K9;HACD3;HMGB1;CAV1;CDKN1A;MAPK14;PAK3;PTK6;IL6R;MYOCD;VEGFA;ERRFI1;OXSR1;CDKN1B;CCNE2;SDC4;DUSP9;NEK4;SESN2;GNG3;PROX1;PRLR;MAPKAPK2;DVL1;SPRED1;RAP1A;OSBPL8;STK4;DIRAS2;PTPN2;SYAP1;MAPK1;UBE2N;MAP4K2;MAPK8IP3;STK11;S1PR2;SYK;TGFBR1;CCNT1;PRKAR2A;IL23R;SAMD5;EFNA5;TAOK1;NCAPG2;CAB39;DUSP14;SNX9	neuron apoptotic process	5	0.017666	STAR;MCL1;RHOA;KCNB1;CASP2	phosphofructokinase activity	2	0.0101653	PFKFB3;PFKFB2	positive regulation of cell junction assembly	3	0.00800602	CAV1;LIMS1;PPM1F
regulation of cellular amide metabolic process	11	0.00398721	CELF4;FXR1;QKI;PDPR;TNRC6B;SYNCRIP;BTG2;LARP1;CNOT6L;TNRC6A;RBM8A	endothelial cell activation	1	0.0244415	TGFBR1	regulation of endothelial cell development	4	0.00174024	CDH5;PPP1R12A;ADD1;S1PR2	STAT cascade	4	0.0177204	MGAT5;DOT1L;ELP2;IFNAR2	L-Lysine	2	0.0101653	SLC16A10;SLC7A1	neuron projection terminus	6	0.00814578	OPHN1;P2RX3;SYT7;FSTL3;GLUL;EPHA4
negative regulation of G1/S transition of mitotic cell cycle	5	0.00399312	CNOT4;BCL2;MDM4;BTG2;CNOT6L	Tat protein binding	1	0.0244415	ACTB	regulation of establishment of endothelial barrier	4	0.00174024	CDH5;PPP1R12A;ADD1;S1PR2	mRNA catabolic process	6	0.0177997	TNPO1;TNRC6B;TNRC6C;AGO1;RBM8A;ZFP36L2	L-Asparagine	2	0.0101653	SLC1A5;SLC16A10	Signaling pathways regulating pluripotency of stem cells	6	0.00814578	REST;WNT9B;MAPK13;SKIL;SOX2;IGF1R
response to gonadotropin	3	0.00400047	ITGA3;EFNA5;HMGCS1	clathrin adaptor activity	1	0.0244415	AP2M1	methionine biosynthetic process	4	0.00174024	MTAP;MRI1;MTHFR;MTHFD1	positive regulation of neuron death	3	0.017812	MCL1;RHOA;CASP2	negative regulation of cell communication	43	0.0101977	IRS1;DCC;TMEM170B;NLGN4X;CREBRF;FXN;PIAS2;TSPAN6;SIK2;NKD1;BMP7;THEM4;F2RL1;PHLDA3;RAB11FIP1;FGFR1;HEYL;VHL;PLIN5;TNFAIP8L1;CTNND1;BCL6;PEA15;GSK3B;ONECUT1;CD109;FKBP1A;CBL;TRIM67;NXN;PEG10;GPRC5A;GNAI2;GATA2;TGFBR1;TRIM72;LILRA2;MTRNR2L1;STK4;TYRO3;SOCS7;EPS15L1;PIM3	positive regulation of protein serine/threonine kinase activity	10	0.0081993	CAB39;TAOK1;STK4;TMEM189-UBE2V1;NTRK3;HMGA2;DAZAP2;EPHA4;FRS2;PRKAA1
negative regulation of protein tyrosine kinase activity	3	0.00400047	CAV1;ERRFI1;SRCIN1	endocytic adaptor activity	1	0.0244415	AP2M1	hydrolase activity, acting on ether bonds	4	0.00174024	TMEM86A;AKR7A2;AHCYL2;AHCY	response to carbohydrate	5	0.0179732	STAR;RHOA;TXNIP;KCNB1;PRKAA1	positive regulation of immune system process	34	0.0104112	MYB;HMGB1;RPS6KA3;MAVS;TSPAN6;TIRAP;NFATC2;ARNT;PVR;CRK;IL6R;CD1D;IRAK4;F2RL1;CFHR5;WIPF3;TMIGD2;WIPF2;EFNB2;BTK;BCL6;ETS1;LIMK1;GPI;ATXN1L;IKBKG;C1RL;GATA2;RIF1;LILRA2;TYRO3;ACVR1B;GPR183;MAPK1	regulation of protein phosphorylation	28	0.00837734	CAB39;HMGB1;CAV1;CTDSPL;CDKN1A;TLR7;SH3BP5;TAOK1;STK4;WNT9B;AR;CD3E;TMEM189-UBE2V1;MINK1;GTF2H1;FER;NTRK3;HMGA2;IL6R;PPM1F;DAZAP2;EPHA4;FRS2;PRKAA1;TRAF3IP1;SOX2;IGF1R;CDK2AP1
cell proliferation	35	0.00400562	IRS1;HMGB1;SOD2;CAV1;HNF4A;MET;BCL2;ATXN1L;CDK6;IL6R;MYOCD;REST;ERRFI1;LAMC1;CCNE2;LEF1;SMAD4;PDXK;MDM4;IGFBP4;TOB2;SMAD2;MNT;LDOC1;BTG2;STK11;SYK;LARP1;VASH1;CNOT6L;EMX2;PTPN14;SDC4;SPN;IL2RA	single-stranded DNA exodeoxyribonuclease activity	1	0.0244415	GEN1	regulation of extent of cell growth	12	0.00175005	ULK2;RAB21;VEGFA;DPYSL2;WNT3;NTN1;SRF;GDI1;BMPR2;SEMA5A;EFNA5;PLXNA3	Non-alcoholic fatty liver disease (NAFLD)	4	0.0181172	ADIPOR2;PIK3R2;CYCS;PRKAA1	regulation of cellular carbohydrate metabolic process	8	0.010591	IRS1;PDK1;HMGB1;SLC35B4;GSK3B;PPP1R3B;PMAIP1;PFKFB2	regulation of cell adhesion	16	0.00839652	HMGB1;CAV1;ADAM22;CD3E;MINK1;ETS1;MYO10;SNAI2;FSTL3;LIMS1;IL6R;RREB1;COL1A1;PPM1F;PAG1;SOX2
negative regulation of cell cycle	14	0.00402216	CNOT4;GAS1;BCL2;CDK6;FOXN3;MYOCD;MDM4;BTG2;STK11;CBX5;PRR11;VASH1;CNOT6L;PEA15	prostanoid receptor activity	1	0.0244415	TBXA2R	adherens junction	38	0.00175558	TNS1;DDX6;CDH5;DCTN4;HACD3;RAB21;CAV1;GJA1;ABI2;PPIA;TRIOBP;YWHAZ;PPP1R12A;ADD1;SDC4;LASP1;CALR;CFL1;ARHGAP31;PKP1;PARVA;ITGA2;FMN1;ITGA3;MCAM;LIMS1;MAPK1;NFASC;RAB10;MPRIP;TLN2;PRKAR2A;BMPR2;STX16;EFNA5;WNK3;NHS;LPP	erythrocyte development	2	0.0183143	TRIM58;TAL1	negative regulation of signaling	43	0.0107151	IRS1;DCC;TMEM170B;NLGN4X;CREBRF;FXN;PIAS2;TSPAN6;SIK2;NKD1;BMP7;THEM4;F2RL1;PHLDA3;RAB11FIP1;FGFR1;HEYL;VHL;PLIN5;TNFAIP8L1;CTNND1;BCL6;PEA15;GSK3B;ONECUT1;CD109;FKBP1A;CBL;TRIM67;NXN;PEG10;GPRC5A;GNAI2;GATA2;TGFBR1;TRIM72;LILRA2;MTRNR2L1;STK4;TYRO3;SOCS7;EPS15L1;PIM3	regulation of cellular response to stress	16	0.00839652	HMGB1;SOD2;CAV1;YOD1;TAOK1;TMEM189-UBE2V1;MINK1;GRINA;SNAI2;BID;SKIL;INSIG1;NTRK3;HMGA2;EPHA4;IGF1R
cell cycle process	25	0.00404282	POGZ;CNOT4;GAS1;BCL2;CDK6;FOXN3;PPP1R12A;CCNE2;MDM4;ARPP19;RTKN;SMC2;TUBGCP3;PSME3;CALML3;BTG2;RAB11FIP4;STK11;CBX5;CCDC69;PRR11;VASH1;CEP97;CNOT6L;NEK9	cellular homeostasis	6	0.0245101	ORMDL3;UBTF;MEN1;TAOK1;TBXA2R;TRPC3	axon guidance	22	0.00177684	EPHB1;RNF165;VEGFA;GRB2;RPS6KA5;SMAD4;DPYSL2;WNT3;NTN1;PLCG1;UNC5B;DVL1;EFNA3;MAPK1;NFASC;MYPN;PIK3R1;BMPR2;SEMA5A;EFNA5;PLXNA3;PLXND1	nuclear-transcribed mRNA poly(A) tail shortening	2	0.0183143	TNRC6B;TNRC6C	protein import into nucleus, translocation	4	0.0107966	MAVS;BCL6;RAN;MAPK1	apoptotic process	36	0.00840287	RNF144B;HMGB1;SOD2;CAV1;CDKN1A;AREL1;NME6;REST;ESR1;TAOK1;TNFAIP8L1;STK4;UBE2Z;AR;CD3E;GRINA;SERBP1;FXN;MTDH;SNAI2;BID;SKIL;NTRK3;HMGA2;IL6R;BTG1;KCNB1;PPM1F;JMY;DDB1;EPHA4;CASP2;FRS2;PRKAA1;SOX2;IGF1R
regulation of protein modification process	32	0.00412607	PPP1R1A;HMGB1;CAV1;MET;PPP1R11;BCL2;IL6R;GMFB;MYOCD;ERRFI1;RPS6KA5;PPP1R12A;CCNE2;SMAD4;ARPP19;PHF19;AKAP13;IGFBP4;GNG3;MAPKAPK2;DIRAS2;MTHFR;CCL22;PIK3R2;MAP4K2;STK11;SYK;EFNA5;SDC4;SRCIN1;PEA15;GSK3B	protein serine/threonine kinase activity	4	0.0245498	ILK;TAOK1;TGFBR1;MAP3K9	endothelial cell migration	18	0.00181696	HMGB1;LGALS8;MAPK14;STC1;VEGFA;CALR;PROX1;PLCG1;SRF;SPRED1;TBXA2R;BCAS3;TGFBR1;S100A2;BMPR2;SEMA5A;VASH1;PLXND1	Circadian rhythm	2	0.0183143	CRY2;PRKAA1	interleukin-6 secretion	4	0.0107966	HMGB1;MAVS;F2RL1;LILRA2	ribonucleoprotein complex assembly	8	0.00878847	AGO3;DDX6;SNU13;AGO2;CPSF7;PRKAA1;CNOT6L;RPF2
regulation of translation	10	0.00412868	CELF4;FXR1;QKI;TNRC6B;SYNCRIP;BTG2;LARP1;CNOT6L;TNRC6A;RBM8A	cell cycle	9	0.0245893	MYB;ACTB;SUV39H1;MEN1;ILK;TAOK1;TGFBR1;GEN1;JMY	neuron projection guidance	22	0.00186517	EPHB1;RNF165;VEGFA;GRB2;RPS6KA5;SMAD4;DPYSL2;WNT3;NTN1;PLCG1;UNC5B;DVL1;EFNA3;MAPK1;NFASC;MYPN;PIK3R1;BMPR2;SEMA5A;EFNA5;PLXNA3;PLXND1	negative regulation of apoptotic process	12	0.0183702	FNIP1;STAR;FFAR4;MTRNR2L1;MCL1;RHOA;NTRK3;DDB1;EPHA4;CASP2;PRKAA1;SIAH2	protein kinase binding	24	0.0108066	IRS1;MAP3K2;RPS6KA3;MAVS;FAM83D;CDK9;ELP2;TIRAP;LIMS1;PIWIL1;PTPN14;CRK;DBF4;PRKAR2A;SAMD5;BCL2L11;CTNND1;GSK3B;EEF1A1;FAM83H;CBL;ADD2;MAPK1;PFKFB2	protein deacetylation	5	0.00881466	ELK4;REST;SKI;SAP30L;PRKAA1
molecular function regulator	33	0.00414298	OPHN1;PPP1R1A;IRS1;HMGB1;CAV1;MET;PPP1R11;BCL2;IL6R;GMFB;GRM7;ERRFI1;PPP1R12A;CCNE2;LEF1;ARPP19;AKAP13;SEMA4G;STC2;IQSEC2;RTKN;PSME3;CCL22;GDI1;CALML3;PIK3R2;STK11;RABGAP1L;BAG1;CABP4;EFNA5;BCL2L13;IL2RA	positive regulation of DNA-binding transcription factor activity	3	0.0250146	UBE2N;JMY;ARID5B	cardiac septum development	12	0.00189857	SUFU;NDST1;NSD2;SMAD4;RARA;PROX1;MDM2;PARVA;HEYL;TGFBR1;BMPR2;PLXND1	P-body	3	0.0183913	TNRC6B;TNRC6C;AGO1	FoxO signaling pathway	8	0.0110567	IRS1;G6PC;BCL2L11;BCL6;TGFBR1;STK4;MAPK1;SETD7	positive regulation of cellular component organization	25	0.00884096	RAB21;CAV1;PALM;HMBOX1;ESR1;AR;PIP4K2C;SYT7;DNMT3B;CD151;SNAI2;GTF2H1;LIMS1;BID;FER;SKIL;NTRK3;RREB1;PPM1F;JMY;DDB1;EPHA4;PRKAA1;CNOT6L;IGF1R
DNA-binding transcription activator activity, RNA polymerase II-specific	12	0.00418005	HNF4A;MYOCD;REST;LEF1;SMAD4;MYCN;PLAGL2;SATB2;SMAD2;ELK1;HEYL;NFIC	regulation of gene expression, epigenetic	3	0.0257798	ACTB;SUV39H1;SMARCD1	regulation of cell cycle arrest	12	0.00189857	CDKN1A;PML;CDKN1B;MDM4;BTG2;CNOT6L;CALR;MDM2;ZNF268;TFDP2;AKT2;TP53	regulation of peptide transport	10	0.0185542	FFAR4;PIK3R2;ARF1;PTPN14;ATG13;INSIG1;KCNB1;PPM1F;SEC16A;PRKAA1	cell-matrix adhesion	11	0.0112312	TRPM7;LIMS1;SEMA3E;TESK2;HPSE;BCL2L11;BCL6;FAM107A;GSK3B;ONECUT1;NPNT	protein homooligomerization	10	0.00889002	ACACA;KCTD15;P2RX3;SOD2;CAV1;CD3E;SKI;BID;GLUL;KCNB1
positive regulation of cellular carbohydrate metabolic process	4	0.00419216	IRS1;HMGB1;ARPP19;PHKG2	endosome membrane	4	0.0267162	RAB15;AP2M1;OCA2;STAM	lipid storage	9	0.00190031	CAV1;BSCL2;SOAT1;GM2A;OSBPL8;PTPN2;FITM2;FFAR2;EHD1	transport along microtubule	4	0.0189273	TNPO1;TRIM58;ARL3;TRAF3IP1	polysaccharide metabolic process	7	0.0115114	IRS1;HMGB1;B3GNT2;G6PC;GSK3B;PPP1R3B;PGM2L1	negative regulation of cell cycle phase transition	7	0.00907822	CTDSPL;CDKN1A;TAOK1;HMGA2;ZFP36L2;CASP2;CNOT6L
paraxial mesoderm morphogenesis	2	0.00420729	LEF1;SMAD2	cell aging	2	0.0267893	PRELP;ILK	mRNA metabolic process	50	0.00193096	NONO;DDX6;TTF2;PABPN1;RPL28;USP49;SF3B3;SAMD4A;MAPK14;CARHSP1;TRUB2;LUC7L2;CELF4;TRA2B;WDR33;CASC3;IGF2BP1;YWHAZ;REST;TSEN2;CSTF3;FXR1;SRSF10;RALY;AGO2;BTG2;CNOT6L;GTPBP1;PKP1;MAPKAPK2;PDE12;RPS24;SRF;PRPF4B;CELF1;TARDBP;RSRC1;SF3A1;SERBP1;GTF2F1;ZC3HAV1;AAR2;SNRPD3;TP53;CCNT1;METTL14;LARP1;POLR2E;MBNL1;GTF2H5	microtubule-based transport	4	0.0189273	TNPO1;TRIM58;ARL3;TRAF3IP1	Insulin resistance	7	0.0115114	IRS1;RPS6KA3;G6PC;MLXIP;GFPT1;GSK3B;PPP1R3B	response to lipid	20	0.00923887	ACACA;HMGB1;CAV1;CDKN1A;REST;ESR1;NR2C2;WNT9B;AR;MTDH;DNMT3B;ETS1;SNAI2;FER;INSIG1;NTRK3;PADI2;COL1A1;ZFP36L2;PRKAA1
regulation of G1/S transition of mitotic cell cycle	6	0.0043285	CNOT4;BCL2;MDM4;PSME3;BTG2;CNOT6L	regulation of cardiac epithelial to mesenchymal transition	1	0.0268533	TGFBR1	proximal promoter sequence-specific DNA binding	37	0.00195053	NONO;KCNIP3;ESR1;CREB1;SMARCC1;RFX3;MYOCD;PGR;REST;LEF1;SMAD4;SSBP2;MYCN;KLF13;RARA;PAX2;NRF1;PROX1;RORA;CHD4;MAZ;BHLHE40;SRF;HES2;ELK1;MAFF;CC2D1B;GMEB1;HEYL;CREB3L2;FOSL1;TP53;E2F2;NFIC;KDM2B;PRDM4;POU2F1	axon	9	0.0189509	ORAI2;ULK1;RHOA;TMOD2;NTRK3;KCNB1;EPHA4;PRKAA1;IREB2	positive regulation of leukocyte proliferation	8	0.0115373	HMGB1;TIRAP;NFATC2;IL6R;CD1D;TMIGD2;BCL6;GPR183	regulation of cellular amide metabolic process	11	0.00943754	YTHDF1;SAMD4A;AGO3;SAMD8;AGO2;RBM8A;ZFP36L2;EPHA4;PRKAA1;QKI;CNOT6L
Insulin signaling pathway	6	0.0043285	IRS1;ELK1;CALML3;PIK3R2;PHKG2;GSK3B	positive regulation of histone H3-K9 methylation	1	0.0268533	MYB	regulation of mRNA stability	13	0.00201657	SAMD4A;MAPK14;CARHSP1;IGF2BP1;YWHAZ;FXR1;CNOT6L;MAPKAPK2;PDE12;TARDBP;SERBP1;METTL14;LARP1	cellular response to alcohol	3	0.018981	GNAI1;PRKAA1;IREB2	iron-sulfur cluster assembly	3	0.0116489	FXN;CIAO1;IBA57	hepatocyte apoptotic process	2	0.00947715	STK4;BID
ureteric bud development	5	0.00436819	BCL2;SMAD4;BASP1;SMAD2;SDC4	L-ascorbic acid metabolic process	1	0.0268533	CYB5R3	epithelial tube morphogenesis	25	0.00201872	MICAL2;ESR1;VEGFA;PGR;PML;SUFU;LEF1;SMAD4;SDC4;DDR1;RARA;PAX2;CFL1;NTN1;CCL11;PROX1;SRF;DVL1;STK4;FMN1;WNT9B;MTHFR;MTHFD1;KDM2B;PLXND1	regulation of steroid biosynthetic process	3	0.018981	STAR;INSIG1;PRKAA1	metallo-sulfur cluster assembly	3	0.0116489	FXN;CIAO1;IBA57	branching involved in prostate gland morphogenesis	2	0.00947715	ESR1;FRS2
negative regulation of catabolic process	9	0.00441161	OPHN1;SF3B3;MET;BCL2;MDM4;MAPKAPK2;SYNCRIP;LARP1;USP7	activation of JNKK activity	1	0.0268533	MAP3K9	gland development	32	0.00202202	CAV1;ESR1;DKK3;CREB1;SMARCC1;VEGFA;PGR;PML;CDKN1B;LEF1;SMAD4;DDR1;RARA;WNT3;NTN1;CCL11;SLC29A1;PROX1;PRLR;SRF;RAP1A;ITGA2;MAPK1;STK11;AKT2;FSTL3;TGFBR1;FEM1B;GNPNAT1;FOXE1;GPAT4;PLXND1	regulation of cysteine-type endopeptidase activity	5	0.0192374	FNIP1;CYCS;RHOA;PPM1F;SIAH2	regulation of growth	25	0.0117414	DCC;RPS6KA3;PNPT1;FXN;BMPR2;TIRAP;NKD1;SEMA3E;MCTS1;SEMA5A;FGFR1;KDM2B;BCL2L11;CACNG7;BCL6;LIMK1;FAM107A;GSK3B;TGFBR1;RAB33B;STK4;ACVR1B;LAMTOR1;SOCS7;SGPL1	nephric duct morphogenesis	2	0.00947715	WNT9B;EPHA4
interspecies interaction between organisms	18	0.00443919	CAV1;PPIA;MET;BCL2;ULBP2;REST;LEF1;VPS37B;CCR5;SYNCRIP;DDX6;RNF216;RAB11FIP4;SYK;CBX5;LARP1;POLR2E;USP7	regulation of type B pancreatic cell proliferation	1	0.0268533	MEN1	negative regulation of apoptotic process	57	0.00211418	EPHB1;NONO;CCND2;CSNK2A1;CCR5;RNF144B;SOD2;CAV1;CDKN1A;STAMBP;DSTYK;SYVN1;ERC1;TPT1;MYOCD;VEGFA;YWHAZ;CDKN1B;LEF1;MDM4;RPS6KA3;DDR1;RARA;PAX2;BTG2;FKBP8;CFL1;SH3RF1;PRLR;MDM2;XIAP;UNC5B;ZNF268;MNT;PSME3;EEF2K;GRINA;YME1L1;TNFSF14;XRCC2;NTSR1;UFM1;AKT2;PLAC8;TP53;BAG1;TGFBR1;PIK3R1;HYPK;SEMA5A;KDM2B;TNFAIP8;PPIF;WNK3;MPZ;PAFAH2;DHCR24	cellular response to dexamethasone stimulus	2	0.0194505	STAR;NR3C1	phosphotyrosine residue binding	4	0.0118181	IRS1;CRK;CBL;MAPK1	negative regulation by host of viral transcription	2	0.00947715	REST;HMGA2
maternal process involved in female pregnancy	4	0.00445315	KPNA6;STC2;ITGA3;LDOC1	hemoglobin complex	1	0.0268533	CYB5R3	sulfur compound biosynthetic process	17	0.00211898	MTAP;PDK3;NDST1;UST;MAT2A;PDPR;MAT1A;MRI1;MTHFR;ST3GAL2;CHST6;ST3GAL1;PRELP;HACD2;MTHFD1;ACACA;PDP2	Arp2/3 complex-mediated actin nucleation	2	0.0194505	ARF1;JMY	carbohydrate metabolic process	22	0.012035	IRS1;PDK1;HMGB1;B3GNT2;G6PC;H6PD;ARNT;DHTKD1;MLXIP;SLC35B4;UEVLD;GPI;GSK3B;ONECUT1;PPP1R3B;IDH3A;PFKFB3;ENTPD5;PGM2L1;PMAIP1;PFKFB2;CYB5R3	Cul4A-RING E3 ubiquitin ligase complex	2	0.00947715	TRPC4AP;DDB1
embryonic pattern specification	4	0.00445315	SMAD4;BASP1;SATB2;SMAD2	palmitoyltransferase complex	1	0.0268533	ORMDL3	cell part morphogenesis	44	0.0021772	TSKU;EPHB1;ULK2;RNF165;RAB21;FBXW8;OPA3;PAK3;CREB1;VEGFA;GRB2;RPS6KA5;SMAD4;UST;DPYSL2;DDR1;WNT3;PAX2;MYH14;CFL1;NTN1;PLCG1;CAPRIN1;UNC5B;SRF;DVL1;EEF2K;GDI1;EFNA3;MAPK1;NFASC;RAB10;CAMK2A;STK11;SLC11A2;MYPN;PIK3R1;BMPR2;NYAP2;SEMA5A;EFNA5;PLXNA3;PLXND1;RAPH1	positive regulation of protein targeting to mitochondrion	2	0.0194505	ATG13;PRKAA1	nucleotide biosynthetic process	15	0.012061	PDK1;PANK2;ARNT;PDP2;DHTKD1;PANK3;ACSL6;ELOVL5;GPI;PFKFB3;ENTPD5;PGM2L1;SCD;MAPK1;PFKFB2	GATOR2 complex	2	0.00947715	CASTOR2;SESN3
negative regulation of protein dephosphorylation	4	0.00445315	PPP1R1A;PPP1R11;ARPP19;GSK3B	hydrolase activity, acting on carbon-nitrogen (but not peptide) bonds, in linear amidines	1	0.0268533	PADI1	body fluid secretion	11	0.00221894	CAV1;VAMP2;CREB1;VEGFA;DDR1;SLC29A1;PRLR;NPR1;WNK3;GPAT4;VAMP8	phagophore assembly site	2	0.0194505	ULK1;ATG13	nicotinamide nucleotide biosynthetic process	7	0.0120749	ARNT;DHTKD1;GPI;PFKFB3;ENTPD5;PGM2L1;PFKFB2	phospholipid biosynthetic process	9	0.00952803	FITM2;PIGO;ETNK1;SAMD8;PIP4K2C;LPCAT3;PIKFYVE;PLA2G12A;FRS2
phospholipid biosynthetic process	9	0.00451377	IRS1;SPTLC2;AGK;PITPNM3;PCYT1A;LPCAT3;PIK3R2;PIP4K2B;HMGCS1	I-SMAD binding	1	0.0268533	TGFBR1	negative regulation of G1/S transition of mitotic cell cycle	11	0.00221894	CTDSPL;CDKN1A;PML;CDKN1B;MDM4;BTG2;CNOT6L;MDM2;TFDP2;ZNF655;TP53	mitotic cytokinesis	3	0.0195811	ARL3;ARF1;RHOA	pyridine nucleotide biosynthetic process	7	0.0120749	ARNT;DHTKD1;GPI;PFKFB3;ENTPD5;PGM2L1;PFKFB2	negative regulation of cellular amide metabolic process	6	0.00960537	SAMD4A;AGO3;AGO2;ZFP36L2;PRKAA1;CNOT6L
G1/S transition of mitotic cell cycle	8	0.00452048	CNOT4;BCL2;CDK6;CCNE2;MDM4;PSME3;BTG2;CNOT6L	protein tag	1	0.0268533	UBL5	regulation of G1/S transition of mitotic cell cycle	14	0.00222119	CCND2;CTDSPL;CDKN1A;PML;CDKN1B;MDM4;BTG2;CNOT6L;MDM2;SENP2;PSME3;TFDP2;ZNF655;TP53	regulation of actin filament polymerization	4	0.0197596	ARF1;RHOA;TMOD2;JMY	regulation of phosphoprotein phosphatase activity	7	0.0120749	ENSA;GSK3B;FKBP1A;PPP1R3B;GNAI2;PPP1R26;PPP1R14C	cell junction assembly	8	0.00968776	OPHN1;CAV1;MTDH;CD151;SNAI2;LIMS1;PPM1F;OCLN
cellular polysaccharide metabolic process	5	0.00456485	PPP1R1A;IRS1;HMGB1;PHKG2;GSK3B	response to growth factor	5	0.0270077	USP15;MEN1;ILK;CD109;TGFBR1	positive regulation of RNA metabolic process	95	0.00229367	SPIB;KPNA6;CREBRF;IL5;PHF19;HMGB1;MICAL2;ESR1;GABPB1;MAPK14;MACC1;CRTC1;CREB1;SMARCC1;RFX3;MYOCD;VEGFA;CELF4;E2F5;TRA2B;PGR;PML;REST;PTGES2;RPS6KA5;PPP1R12A;LEF1;SMAD4;SSBP2;MYCN;RPS6KA3;PLAGL2;KLF13;RARA;ATXN7L3;PAX2;AGO2;BTG2;NEK4;CNOT6L;SESN2;NRF1;PROX1;RORA;S1PR1;GTPBP1;DHX33;SRF;DVL1;ZNF268;MNT;WWC1;SENP2;KAT7;TARDBP;ELK1;TFDP2;MAFF;PKNOX1;MAPK1;ZNF485;GMEB1;MYCBP;HEYL;MLXIP;CREB3L2;RPS6KA4;…	lipid biosynthetic process	10	0.0200921	STAR;ADIPOR2;PIK3R2;ORMDL2;ARF1;PIKFYVE;INSIG1;PLA2G12A;FRS2;PRKAA1	limbic system development	7	0.0120749	CRK;FGFR1;EZH1;ETS1;GSK3B;BTG2;RAN	transcription coregulator activity	14	0.0097918	E2F6;TCERG1;HMGB1;ELK4;NR2C2;MTDH;DNMT3B;SKI;HES2;HMGA2;BTG1;JMY;TOB2;MTF1
mesonephric epithelium development	5	0.00456485	BCL2;SMAD4;BASP1;SMAD2;SDC4	negative regulation of signal transduction	7	0.0270206	CASTOR2;PHLDA3;MEN1;CD109;TGFBR1;STAM;RBMS3	regulation of protein modification process	100	0.00229599	EPHB1;CCND2;MAP3K9;IL5;PHF19;HACD3;PPP1R1A;HMGB1;CAV1;CTDSPL;CDKN1A;PPP2R1B;DSTYK;MAPK14;PAK3;GPR37L1;GNL3L;PTK6;IL6R;ARPP19;MYOCD;VEGFA;ERRFI1;PML;GRB2;PHACTR2;NDST1;OXSR1;CDKN1B;RPS6KA5;PPP1R12A;CCNE2;SMAD4;KLHDC10;SDC4;PTPA;DDR1;IGFBP4;DUSP9;UBE2S;NEK4;SESN2;FKBP8;GNG3;SH3RF1;CCL11;PROX1;PRLR;PPP1R11;DCUN1D5;FGF9;XIAP;MAPKAPK2;DHX33;DVL1;SPRED1;RAP1A;PPP1R14C;OSBPL8;WWC1;STK4;DIRAS2;SENP2;PTPN…	serine/threonine protein kinase complex	3	0.0201916	ULK1;CKS1B;ATG13	regulation of phospholipid metabolic process	6	0.0125844	IRS1;ATG14;LDLR;MTMR3;SOCS7;MTMR9	dendrite	15	0.00982972	OPHN1;SLC38A2;P2RX3;SAMD4A;SHISA9;PALM;PLCB4;CD3E;MINK1;AGO2;SYT7;KCNB1;RBM8A;EPHA4;PRKAA1
mesonephric tubule development	5	0.00456485	BCL2;SMAD4;BASP1;SMAD2;SDC4	positive regulation of cellular component organization	7	0.0271283	MYB;UBE2N;ILK;UBL5;TGFBR1;PPM1F;JMY	Fc epsilon RI signaling pathway	9	0.00234568	IL5;MAPK14;GRB2;VAV3;PLCG1;MAPK1;AKT2;SYK;PIK3R1	Colorectal cancer	3	0.0201916	PIK3R2;CYCS;RHOA	nucleic acid transport	10	0.0127627	PNPT1;SMG1;PHAX;RBM8A;NCBP3;PABPN1;QKI;RAN;YTHDC1;NUP214	positive regulation of kinase activity	14	0.0100854	CAB39;HMGB1;CDKN1A;TAOK1;STK4;TMEM189-UBE2V1;MINK1;NTRK3;HMGA2;IL6R;DAZAP2;EPHA4;FRS2;PRKAA1
mitotic DNA damage checkpoint	5	0.00456485	CNOT4;FOXN3;MDM4;BTG2;CNOT6L	negative regulation of transferase activity	3	0.0278818	MEN1;ILK;PPM1F	positive regulation of neuron differentiation	27	0.00234813	ABL2;RAB21;FBXW8;PAK3;CRTC1;PTK6;VEGFA;REST;RARA;WNT3;NTN1;PROX1;CAPRIN1;SRF;DVL1;RAP1A;ITGA3;EEF2K;GDI1;HEYL;CREB3L2;STK11;BMPR2;SEMA5A;EFNA5;PLXNA3;PLXND1	positive regulation of cellular protein localization	6	0.020193	PIK3R2;GNAI1;ATG13;KCNB1;SEC16A;PRKAA1	RNA transport	10	0.0127627	PNPT1;SMG1;PHAX;RBM8A;NCBP3;PABPN1;QKI;RAN;YTHDC1;NUP214	dendritic tree	15	0.0101087	OPHN1;SLC38A2;P2RX3;SAMD4A;SHISA9;PALM;PLCB4;CD3E;MINK1;AGO2;SYT7;KCNB1;RBM8A;EPHA4;PRKAA1
protein serine/threonine kinase activity	12	0.0045651	CDK6;RPS6KA5;CCNE2;AKAP13;MAPKAPK2;MAP4K2;STK11;SYK;PHKG2;SMG1;NEK9;GSK3B	nuclear matrix	2	0.0287422	MYB;MEN1	regulation of cellular amide metabolic process	29	0.00235245	YTHDF1;SAMD4A;UHMK1;PDK3;TRUB2;CELF4;CASC3;IGF2BP1;EIF4H;FXR1;RPS6KA3;RARA;PDPR;AGO2;BTG2;CNOT6L;SESN2;CALR;CAPRIN1;UNK;ITGA2;CELF1;MAPK1;AKT2;METTL14;LARP1;PGAM1;PDP2;TMED10	protein-containing complex assembly	20	0.0204102	TMEM170A;FNIP1;SF3A3;ULK1;ARF1;TAL1;RHOA;AGO1;TMOD2;FBLIM1;COX10;INSIG1;KCNB1;COL1A1;JMY;DDB1;SEC16A;PRKAA1;FCHO2;TRAF3IP1	positive regulation of B cell proliferation	4	0.0128996	TIRAP;NFATC2;BCL6;GPR183	protein modification by small protein conjugation or removal	22	0.0101402	RNF165;RNF144B;CAV1;AREL1;INO80D;FOXK2;ZBED1;YOD1;ESR1;UBE2Z;AR;TMEM189-UBE2V1;JADE2;GNL3L;SPRTN;PSMB5;UNKL;SOCS7;RNF111;TRPC4AP;DCAF16;DDB1
positive regulation of protein metabolic process	30	0.00461391	MYLIP;HMGB1;CAV1;MET;BCL2;IL6R;REST;FXR1;RPS6KA5;PPP1R12A;SMAD4;PHF19;AKAP13;IGFBP4;GNG3;MAPKAPK2;DIRAS2;PSME3;CCL22;MAP4K2;STK11;SYK;LARP1;EFNA5;SDC4;BCL2L13;SRCIN1;SPN;PEA15;GSK3B	positive regulation of transcription, DNA-templated	8	0.028967	MYB;UBTF;CITED4;MEN1;BRPF1;ILK;TGFBR1;SMARCD1	leukocyte degranulation	37	0.00236897	SURF4;CD55;HMGB1;VAMP2;NFAM1;MAPK14;CYBB;PPIA;SIGLEC14;PTGES2;PDXK;RAB7A;RAB5C;RAB5B;PKP1;GM2A;RAP1A;ADA2;MAGT1;FLG2;MAPK1;NFASC;RAB10;COMMD9;TSPAN14;PLAC8;SYK;QSOX1;HPSE;PGAM1;CD84;MLEC;METTL7A;CD68;CAB39;VAMP8;PAFAH1B2	negative regulation of programmed cell death	12	0.0204484	FNIP1;STAR;FFAR4;MTRNR2L1;MCL1;RHOA;NTRK3;DDB1;EPHA4;CASP2;PRKAA1;SIAH2	positive regulation of nucleotide biosynthetic process	4	0.0128996	ARNT;PFKFB3;ENTPD5;PFKFB2	response to oxygen levels	10	0.0102053	P2RX3;CAV1;CDKN1A;REST;MTHFR;SUV39H1;DNMT3B;ETS1;COL1A1;PRKAA1
glucose homeostasis	8	0.0046377	IRS1;HNF4A;ZBTB20;RAB11B;PTPRN2;PIK3R2;STK11;EFNA5	positive regulation of SMAD protein signal transduction	1	0.0292592	TGFBR1	positive regulation of axon extension involved in axon guidance	3	0.00239488	VEGFA;BMPR2;SEMA5A	mRNA binding	5	0.020559	NCBP3;RBM8A;ZFP36L2;SECISBP2L;IREB2	positive regulation of purine nucleotide biosynthetic process	4	0.0128996	ARNT;PFKFB3;ENTPD5;PFKFB2	catalytic complex	27	0.0102745	CAB39;E2F6;RNF144B;DBT;SF3B3;CDKN1A;DNAL1;REST;AGO3;PRPF4B;POLD3;TMEM189-UBE2V1;AGO2;DDA1;JADE2;PSMB5;GTF2H1;SOCS7;CBX5;TRPC4AP;RBM8A;SAP30L;DCAF16;DDB1;PRKAA1;CHML;IGF1R
neuron projection terminus	6	0.00464424	OPHN1;SYT7;PTPRN2;ELK1;PRRT2;CABP4	keratan sulfate catabolic process	1	0.0292592	PRELP	columnar/cuboidal epithelial cell maturation	3	0.00239488	CDKN1A;RFX3;GPAT4	leukocyte adhesion to vascular endothelial cell	2	0.0206156	RHOA;NFAT5	regulation of polysaccharide metabolic process	4	0.0128996	IRS1;HMGB1;GSK3B;PPP1R3B	protein kinase complex	5	0.0103253	CAB39;CDKN1A;GTF2H1;PRKAA1;IGF1R
carbohydrate homeostasis	8	0.00475724	IRS1;HNF4A;ZBTB20;RAB11B;PTPRN2;PIK3R2;STK11;EFNA5	negative regulation of telomerase activity	1	0.0292592	MEN1	phenotypic switching	3	0.00239488	SOD2;MYOCD;FGF9	extracellular regulation of signal transduction	2	0.0206156	MTRNR2L1;LRPAP1	regulation of peptidyl-threonine phosphorylation	4	0.0128996	BMP7;CAB39;WNK3;MAPK1	cellular response to nutrient	4	0.0104227	P2RX3;CASTOR2;SNAI2;COL1A1
negative regulation of cell cycle G1/S phase transition	5	0.00476773	CNOT4;BCL2;MDM4;BTG2;CNOT6L	manganese ion transport	1	0.0292592	TRPC3	regulation of phenotypic switching	3	0.00239488	SOD2;MYOCD;FGF9	extracellular negative regulation of signal transduction	2	0.0206156	MTRNR2L1;LRPAP1	nucleoside phosphate biosynthetic process	15	0.0129797	PDK1;PANK2;ARNT;PDP2;DHTKD1;PANK3;ACSL6;ELOVL5;GPI;PFKFB3;ENTPD5;PGM2L1;SCD;MAPK1;PFKFB2	positive regulation of cellular protein metabolic process	30	0.0105116	CAB39;RNF144B;YTHDF1;HMGB1;SAMD4A;CAV1;CDKN1A;REST;TAOK1;STK4;AR;CD3E;TMEM189-UBE2V1;MINK1;DNMT3B;SPRTN;SNAI2;BID;NTRK3;RNF111;HMGA2;IL6R;PPM1F;DAZAP2;EPHA4;FRS2;PRKAA1;SOX2;IGF1R;CDK2AP1
Human papillomavirus infection	10	0.00477322	CDK6;LAMC1;CCNE2;HLA-C;PATJ;ITGA3;HEYL;PIK3R2;HES2;GSK3B	npBAF complex	1	0.0292592	SMARCD1	cellular protein localization	102	0.00240369	SURF4;KCNIP3;PABPN1;RPL28;KPNA6;RAB21;CACNG8;RPH3AL;CAV1;PALM;ESR1;VAMP2;SYVN1;MAPK14;UHMK1;GOSR2;KLHL21;STX2;GNL3L;NUP43;WDR33;CASC3;PML;SUFU;YWHAZ;AGK;CHCHD4;NLGN2;CRIPT;CCNE2;DDX19B;HPS4;RAB7A;IQSEC2;RTKN;UBL4A;SESN2;RPH3A;CALR;RAB11B;CENPQ;RAB5C;FGF9;BBC3;RAB5B;MDM2;RPS24;BBS1;DVL1;RAP1A;YOD1;OSBPL8;SAR1B;MCM8;KAT7;ITGA3;TARDBP;GPSM2;TFDP2;AP2M1;GDI1;FAM83H;UBE2G2;PEX26;MAPK1;OPTN;NFASC;RAB15…	phosphatidylinositol metabolic process	5	0.0208984	PIK3R2;ARF1;PIKFYVE;PLA2G12A;FRS2	regulation of nuclease activity	3	0.0132631	HMGB1;DFFA;TERF1	positive regulation of cell morphogenesis involved in differentiation	6	0.0105657	RAB21;LIMS1;SKIL;NTRK3;RREB1;EPHA4
kidney epithelium development	6	0.00480831	BCL2;SMAD4;BASP1;SMAD2;HEYL;SDC4	GATOR2 complex	1	0.0292592	CASTOR2	neuron projection morphogenesis	42	0.00240461	TSKU;EPHB1;ULK2;RNF165;RAB21;FBXW8;PAK3;CREB1;VEGFA;GRB2;RPS6KA5;SMAD4;UST;DPYSL2;DDR1;WNT3;PAX2;CFL1;NTN1;PLCG1;CAPRIN1;UNC5B;SRF;DVL1;EEF2K;GDI1;EFNA3;MAPK1;NFASC;RAB10;CAMK2A;STK11;SLC11A2;MYPN;PIK3R1;BMPR2;NYAP2;SEMA5A;EFNA5;PLXNA3;PLXND1;RAPH1	regulation of establishment of protein localization	10	0.020986	FFAR4;PIK3R2;ARF1;PTPN14;ATG13;INSIG1;KCNB1;PPM1F;SEC16A;PRKAA1	positive regulation of toll-like receptor signaling pathway	3	0.0132631	HMGB1;TIRAP;F2RL1	positive regulation of cell adhesion	11	0.0106999	HMGB1;CAV1;CD3E;ETS1;MYO10;FSTL3;LIMS1;IL6R;RREB1;PPM1F;SOX2
sequence-specific double-stranded DNA binding	18	0.00490531	HNF4A;RFX3;MYOCD;REST;LEF1;SMAD4;MYCN;POU2F1;GTF2H5;ZHX3;SATB2;SMAD2;ELK1;MNT;HEYL;HES2;ZNF704;NFIC	endodeoxyribonuclease activity, producing 3'-phosphomonoesters	1	0.0292592	GEN1	erythrocyte differentiation	12	0.00240725	MAPK14;VEGFA;CDK6;ADD1;KLF13;SRF;FAM210B;PTPN2;PKNOX1;ACVR2A;SLC11A2;NCAPG2	RNA binding	18	0.0210162	TNPO1;SF3A3;NR3C1;TNRC6B;TNRC6C;ARF1;MAK16;AGO1;SRSF7;MRPS21;NCBP3;RBM8A;ZFP36L2;MBNL3;QKI;SECISBP2L;IREB2;ANXA11	primitive hemopoiesis	2	0.0133499	GATA2;STK4	receptor internalization	5	0.010729	OPHN1;CACNG8;CAV1;LRPAP1;GRK3
filopodium	5	0.00497694	PALM;NPTXR;ITGA3;SRCIN1;CBX6	adenyl ribonucleotide binding	8	0.0299894	ACTB;UBE2Z;UBE2N;ILK;TAOK1;TGFBR1;MAP3K9;CYB5R3	mammary gland duct morphogenesis	6	0.0024688	ESR1;PGR;PML;DDR1;NTN1;CCL11	regulation of actin cytoskeleton organization	6	0.0210371	ARF1;RHOA;TMOD2;NTRK3;PPM1F;JMY	regulation of acetyl-CoA biosynthetic process from pyruvate	2	0.0133499	PDK1;PDP2	mitotic DNA integrity checkpoint	5	0.010729	CDKN1A;TAOK1;HMGA2;CASP2;CNOT6L
positive regulation of protein kinase activity	13	0.00499616	HMGB1;IL6R;AKAP13;GNG3;MAPKAPK2;DIRAS2;MAP4K2;STK11;SYK;EFNA5;SDC4;SRCIN1;PEA15	epithelial cell migration	3	0.030073	TBXA2R;TGFBR1;PPM1F	focal adhesion	30	0.00247343	TNS1;DCTN4;HACD3;RAB21;CAV1;GJA1;PPIA;TRIOBP;YWHAZ;PPP1R12A;ADD1;SDC4;LASP1;CALR;CFL1;ARHGAP31;PARVA;ITGA2;ITGA3;MCAM;LIMS1;MAPK1;NFASC;RAB10;MPRIP;TLN2;PRKAR2A;STX16;NHS;LPP	anatomical structure maturation	4	0.0214912	TRIM58;TAL1;RHOA;TRPC4AP	5'-3' exodeoxyribonuclease activity	2	0.0133499	APTX;GEN1	cellular response to starvation	6	0.0109004	SLC38A2;CDKN1A;WNT9B;SESN3;GLUL;PRKAA1
somatodendritic compartment	18	0.00509019	OPHN1;PALM;ATXN1L;GRM7;FXR1;SYT7;NPTXR;GNG3;ELK1;PRRT2;GDI1;NFASC;SHISA9;SRCIN1;RBM8A;CBX6;FRMPD4;GSK3B	kidney development	3	0.030073	ILK;TGFBR1;ARID5B	developmental growth	42	0.00247594	ULK2;RAB21;CDKN1A;ESR1;MAPK14;STC1;BNC2;CREB1;VEGFA;EIF4H;CDKN1B;SMAD4;ADD1;DPYSL2;DDR1;RARA;WNT3;FKBP8;NTN1;CCL11;PROX1;S1PR1;FGF9;BASP1;SRF;DVL1;WWC1;STK4;FMN1;GDI1;STK11;XRCC2;PLAC8;TGFBR1;BMPR2;SEMA5A;EFNA5;NCAPG2;VWA1;PLXNA3;GPAT4;RAPH1	response to mineralocorticoid	2	0.0218092	STAR;NTRK3	poly(G) binding	2	0.0133499	PNPT1;ATXN1	lens development in camera-type eye	4	0.010958	SKI;SKIL;NTRK3;FRS2
renal system development	9	0.00516611	BCL2;MYOCD;SMAD4;BASP1;SMAD2;ITGA3;HEYL;EMX2;SDC4	regulation of protein localization to cell periphery	2	0.0302434	ACTB;AP2M1	positive regulation of posttranscriptional gene silencing	5	0.00249705	FXR1;MYCN;AGO2;TP53;XPO5	regulation of autophagosome assembly	2	0.0218092	ULK1;PIKFYVE	Seliciclib	2	0.0133499	CDK9;MAPK1	nucleotide-excision repair, DNA incision, 5'-to lesion	3	0.0109925	POLD3;GTF2H1;DDB1
alpha-beta T cell differentiation	5	0.00519257	HMGB1;BCL2;LEF1;SYK;SPN	regulation of osteoblast differentiation	2	0.0302434	MEN1;ILK	nucleoplasm part	66	0.00251842	DCAF7;NONO;TTF2;PABPN1;CSNK2A1;GATAD2A;CREBRF;PHF19;CDKN1A;CBX5;MAPK14;C11orf54;ZNF470;NACC1;CRTC1;PHAX;PTK6;LUC7L2;KDM5C;WDR33;CASC3;PML;REST;ADD1;SRSF10;ATXN7L3;RPRD2;GLYR1;CHD4;MDM2;BASP1;BHLHE40;STK4;PRPF4B;FANCC;STK35;SENP2;ZNF106;KAT7;TARDBP;SUV39H1;RSRC1;SF3A1;YME1L1;MEAF6;TBXA2R;GTF2F1;MED28;SNRPD3;PEX2;TP53;FYTTD1;PIAS2;ZBTB16;FANCA;CCNT1;POLR2E;ATF7IP;ZNF621;XPO5;NCAPG2;NHS;PRDM4;SPN;GT…	hormone-mediated signaling pathway	5	0.0219387	ADIPOR2;NR3C1;CRY2;RHOA;NCOR2	phosphatidylinositol 3-kinase signaling	8	0.0136147	IRS1;NYAP2;F2RL1;FGFR1;CBL;ENTPD5;TYRO3;MAPK1	porphyrin-containing compound metabolic process	3	0.0109925	FXN;COX10;IBA57
gas homeostasis	2	0.00522074	SOD2;CAV1	epithelium migration	3	0.0309177	TBXA2R;TGFBR1;PPM1F	Signaling pathways regulating pluripotency of stem cells	14	0.00254249	MAPK14;GRB2;REST;SMAD4;WNT3;DUSP9;DVL1;PCGF3;WNT9B;MAPK1;ACVR2A;AKT2;PIK3R1;BMPR2	cytokinesis	4	0.0223908	ARL3;ARF1;RHOA;ANXA11	Insulin signaling pathway	8	0.0136147	IRS1;G6PC;CRK;PRKAR2A;GSK3B;PPP1R3B;CBL;MAPK1	head morphogenesis	3	0.0109925	CRISPLD2;SKI;COL1A1
regulation of cellular carbohydrate catabolic process	2	0.00522074	HMGB1;PHKG2	regulation of body fluid levels	4	0.0309805	ACTB;ILK;TBXA2R;TRPC3	cell proliferation	110	0.00260178	EPHB1;CCND2;EMX2;CSNK2A1;ABL2;CD55;IL5;CDV3;HMGB1;SOD2;CAV1;CDKN1A;STAMBP;ESR1;FBXW8;MAPK14;STC1;GPR37L1;NACC1;SKAP2;CREB1;LIPG;IL6R;MYOCD;VEGFA;PGR;IGF2BP1;ERRFI1;PML;CDK6;REST;CDKN1B;LAMC1;CCNE2;LEF1;SMAD4;VAV3;PDXK;MDM4;CD164;SDC4;DDR1;SLC29A2;KLF13;RARA;IGFBP4;WNT3;PAX2;TOB2;BTG2;CNOT6L;CALR;SH3RF1;NTN1;CCL11;PROX1;PLCG1;RORA;RASGRF1;S1PR1;FGF9;MDM2;XIAP;NPR1;SRF;ZNF268;MNT;ITGA2;STK4;PTPN2;L…	negative regulation of gene expression	19	0.0224527	TNPO1;FNIP1;ZHX3;NR3C1;CRY2;TNRC6B;TNRC6C;TAL1;AGO1;SRSF7;TXNIP;NCOR2;DOT1L;SKIL;RBM8A;PPM1F;ZFP36L2;PRKAA1;IREB2	regulation of developmental growth	14	0.0137912	DCC;FXN;BMPR2;NKD1;SEMA3E;SEMA5A;FGFR1;BCL2L11;CACNG7;LIMK1;GSK3B;TGFBR1;STK4;SGPL1	neuron to neuron synapse	10	0.0110207	P2RX3;GRID1;CACNG8;SHISA9;PALM;PLCB4;ADAM22;MINK1;SYT7;EPHA4
transforming growth factor beta receptor, cytoplasmic mediator activity	2	0.00522074	SMAD4;SMAD2	DNA metabolic process	6	0.0311734	UBE2N;MEN1;TAOK1;GEN1;JMY;INIP	Circadian entrainment	11	0.00262471	CREB1;RPS6KA5;GNG3;GRIN2B;ADCY6;CAMK2G;GNB4;MAPK1;CALML3;ADCY2;CAMK2A	microtubule binding	5	0.0226506	ARL3;KIF6;HOOK3;FCHO2;TRAF3IP1	regulation of phosphatase activity	9	0.0138597	ENSA;GSK3B;FKBP1A;PPP1R3B;GNAI2;PPP1R26;MTMR9;PPP1R14C;NPNT	protein heterotrimerization	2	0.0111085	C1QTNF6;COL1A1
protein acylation	8	0.00525921	ZDHHC16;MYOCD;RPS6KA5;LEF1;SMAD4;ZDHHC22;MEAF6;GSK3B	negative regulation of cell cycle process	3	0.0312021	MEN1;TAOK1;GEN1	locomotion	98	0.00264931	EPHB1;TNS1;EMX2;ABL2;CCR5;MDGA1;RNF165;HMGB1;SOD2;CAV1;LGALS8;GLG1;MAPK14;STC1;ABI2;PAK3;EFHC1;PPIA;CREB1;PTK6;IL6R;RFX3;MYOCD;VEGFA;PML;GRB2;CDK6;OXSR1;LAMC1;RPS6KA5;LEF1;SMAD4;VAV3;VPS37B;ANKS1A;DPYSL2;RAB7A;SDC4;DDR1;WNT3;NRG4;AGO2;CALR;CFL1;SH3RF1;NTN1;CCL11;PROX1;PLCG1;CRB2;SORD;S1PR1;FGF9;MDM2;PIK3C2B;PARVA;UNC5B;SRF;DVL1;ZNF268;SPRED1;UNK;ITGA2;AVL9;OSBPL8;WWC1;PTPN2;ITGA3;MCAM;CCL22;FAM83…	regulation of macroautophagy	4	0.0228491	VPS13D;ULK1;ATG13;PIKFYVE	pyridine-containing compound biosynthetic process	7	0.0138847	ARNT;DHTKD1;GPI;PFKFB3;ENTPD5;PGM2L1;PFKFB2	dendritic spine membrane	2	0.0111085	SHISA9;PALM
mitotic G1 DNA damage checkpoint	4	0.00530129	CNOT4;MDM4;BTG2;CNOT6L	negative regulation of transmembrane receptor protein serine/threonine kinase signaling pathway	2	0.0312612	CD109;TGFBR1	lipid homeostasis	13	0.00269382	MYLIP;CAV1;LIPG;RALY;SOAT1;SESN2;RORA;COMMD9;ACACA;PNPLA3;ACOX1;FITM2;EHD1	positive regulation of cell development	8	0.0229184	STAR;TRIM58;ARF1;RHOA;TRIM67;SKIL;NTRK3;EPHA4	cellular carbohydrate catabolic process	4	0.0140421	HMGB1;G6PC;PPP1R3B;PGM2L1	response to glucocorticoid	6	0.0112426	HMGB1;CDKN1A;REST;DNMT3B;NTRK3;ZFP36L2
mitotic G1/S transition checkpoint	4	0.00530129	CNOT4;MDM4;BTG2;CNOT6L	regulation of cell-matrix adhesion	2	0.0312612	ILK;PPM1F	regulation of kinase activity	53	0.00273277	CCND2;MAP3K9;HACD3;HMGB1;CAV1;CDKN1A;DSTYK;MAPK14;PAK3;PTK6;IL6R;MYOCD;VEGFA;ERRFI1;OXSR1;CDKN1B;CCNE2;VAV3;SDC4;DUSP9;NEK4;SESN2;GNG3;PROX1;PRLR;MAPKAPK2;DVL1;SPRED1;RAP1A;OSBPL8;STK4;DIRAS2;PTPN2;SYAP1;MAPK1;UBE2N;MAP4K2;MAPK8IP3;STK11;S1PR2;SYK;TGFBR1;CCNT1;PIK3R1;PRKAR2A;IL23R;SAMD5;EFNA5;TAOK1;NCAPG2;CAB39;DUSP14;SNX9	positive regulation of cell differentiation	12	0.0230339	STAR;ZHX3;TRIM58;ARF1;TAL1;RHOA;TRIM67;SKIL;NTRK3;COL1A1;EPHA4;AKIRIN1	cortical actin cytoskeleton organization	4	0.0140421	WIPF3;WIPF2;EPB41L1;FMNL2	response to oxygen-containing compound	30	0.0117308	ACACA;P2RX3;HMGB1;SOD2;CAV1;CDKN1A;ESR1;WNT9B;MTHFR;AR;CASTOR2;NDOR1;MAPK13;FXN;MTDH;DNMT3B;ETS1;SNAI2;SESN3;FER;INSIG1;NTRK3;SOCS7;GLUL;BTG1;KCNB1;COL1A1;EPHA4;PRKAA1;IGF1R
transferase complex	17	0.00538221	IRS1;POGZ;SPTLC2;CDK6;REST;CCNE2;PHF19;ATXN7L3;GTF2H5;CBX2;RPRD2;DCAF7;MEAF6;PIK3R2;PHKG2;CBX5;POLR2E	adenyl nucleotide binding	8	0.0313562	ACTB;UBE2Z;UBE2N;ILK;TAOK1;TGFBR1;MAP3K9;CYB5R3	cell-substrate adherens junction	30	0.00275974	TNS1;DCTN4;HACD3;RAB21;CAV1;GJA1;PPIA;TRIOBP;YWHAZ;PPP1R12A;ADD1;SDC4;LASP1;CALR;CFL1;ARHGAP31;PARVA;ITGA2;ITGA3;MCAM;LIMS1;MAPK1;NFASC;RAB10;MPRIP;TLN2;PRKAR2A;STX16;NHS;LPP	autophagosome assembly	3	0.0234005	ULK1;ATG13;PIKFYVE	cellular response to glucose starvation	4	0.0140421	SIK2;ATG14;MTMR3;PMAIP1	regulation of phosphate metabolic process	32	0.0119265	CAB39;MGAT5;PPP1R1A;HMGB1;CAV1;CTDSPL;CDKN1A;TLR7;SH3BP5;TAOK1;ARPP19;STK4;WNT9B;AR;CD3E;TMEM189-UBE2V1;MINK1;GTF2H1;FER;NTRK3;SOCS7;HMGA2;IL6R;PPM1F;DAZAP2;EPHA4;FRS2;PRKAA1;TRAF3IP1;SOX2;IGF1R;CDK2AP1
mesonephros development	5	0.00541474	BCL2;SMAD4;BASP1;SMAD2;SDC4	response to platelet aggregation inhibitor	1	0.0316593	ACTB	cellular macromolecule localization	102	0.00284555	SURF4;KCNIP3;PABPN1;RPL28;KPNA6;RAB21;CACNG8;RPH3AL;CAV1;PALM;ESR1;VAMP2;SYVN1;MAPK14;UHMK1;GOSR2;KLHL21;STX2;GNL3L;NUP43;WDR33;CASC3;PML;SUFU;YWHAZ;AGK;CHCHD4;NLGN2;CRIPT;CCNE2;DDX19B;HPS4;RAB7A;IQSEC2;RTKN;UBL4A;SESN2;RPH3A;CALR;RAB11B;CENPQ;RAB5C;FGF9;BBC3;RAB5B;MDM2;RPS24;BBS1;DVL1;RAP1A;YOD1;OSBPL8;SAR1B;MCM8;KAT7;ITGA3;TARDBP;GPSM2;TFDP2;AP2M1;GDI1;FAM83H;UBE2G2;PEX26;MAPK1;OPTN;NFASC;RAB15…	mitochondrial envelope	10	0.0236438	STAR;AK2;MRPS18B;MCL1;ULK1;CYCS;TXNIP;MRPS21;COX10;EPHA4	transferase complex, transferring phosphorus-containing groups	12	0.0144083	IRS1;CDK9;SIK2;ATG14;PRKAR2A;IKBKG;TGFBR1;CAB39;ACVR1B;SOCS7;RPRD2;MYO6	regulation of phosphorus metabolic process	32	0.0121187	CAB39;MGAT5;PPP1R1A;HMGB1;CAV1;CTDSPL;CDKN1A;TLR7;SH3BP5;TAOK1;ARPP19;STK4;WNT9B;AR;CD3E;TMEM189-UBE2V1;MINK1;GTF2H1;FER;NTRK3;SOCS7;HMGA2;IL6R;PPM1F;DAZAP2;EPHA4;FRS2;PRKAA1;TRAF3IP1;SOX2;IGF1R;CDK2AP1
Hepatitis B	6	0.00550752	BCL2;CDK6;CCNE2;SMAD4;ELK1;PIK3R2	low-density lipoprotein particle receptor catabolic process	1	0.0316593	AP2M1	positive regulation of macromolecule biosynthetic process	102	0.00289344	SPIB;KPNA6;CREBRF;IL5;PHF19;YTHDF1;HMGB1;SAMD4A;MICAL2;ESR1;GABPB1;MAPK14;UHMK1;PAK3;CYBB;MACC1;CRTC1;TRUB2;CREB1;SMARCC1;RFX3;MYOCD;VEGFA;E2F5;PGR;PML;DYRK2;REST;PTGES2;FXR1;RPS6KA5;PPP1R12A;LEF1;SMAD4;SSBP2;MYCN;RPS6KA3;PLAGL2;KLF13;RARA;ATXN7L3;PAX2;AGO2;SOAT1;NEK4;SESN2;NRF1;PROX1;RORA;S1PR1;MAPKAPK2;DHX33;SRF;DVL1;ZNF268;MNT;ITGA2;WWC1;SENP2;KAT7;TARDBP;ELK1;TFDP2;MAFF;PKNOX1;MAPK1;ZNF485;GM…	glycerophospholipid biosynthetic process	5	0.0237463	PIK3R2;ARF1;PIKFYVE;PLA2G12A;FRS2	monocarboxylic acid biosynthetic process	13	0.0145587	LIAS;FADS6;ARNT;DHTKD1;ELOVL5;PTGS1;GPI;PTGES2;PFKFB3;ENTPD5;PGM2L1;SCD;PFKFB2	ribonucleoprotein complex subunit organization	8	0.0122346	AGO3;DDX6;SNU13;AGO2;CPSF7;PRKAA1;CNOT6L;RPF2
G1 DNA damage checkpoint	4	0.00560638	CNOT4;MDM4;BTG2;CNOT6L	negative regulation of keratinocyte proliferation	1	0.0316593	CD109	anchoring junction	38	0.00290988	TNS1;DDX6;CDH5;DCTN4;HACD3;RAB21;CAV1;GJA1;ABI2;PPIA;TRIOBP;YWHAZ;PPP1R12A;ADD1;SDC4;LASP1;CALR;CFL1;ARHGAP31;PKP1;PARVA;ITGA2;FMN1;ITGA3;MCAM;LIMS1;MAPK1;NFASC;RAB10;MPRIP;TLN2;PRKAR2A;BMPR2;STX16;EFNA5;WNK3;NHS;LPP	cytoskeletal protein binding	12	0.0242384	SNTG1;ARL3;RHOA;SYNM;TMOD2;FBLIM1;KIF6;HOOK3;JMY;PRKAA1;FCHO2;TRAF3IP1	regulation of histone H3-K9 methylation	3	0.0149983	MYB;RIF1;SETD7	regulation of response to wounding	6	0.0123146	HMGB1;CAV1;CDKN1A;NTRK3;RREB1;EPHA4
peptide secretion	14	0.0057022	IRS1;HMGB1;PPIA;HNF4A;PPP1R11;RFX3;REST;SYT7;RAB11B;SMAD2;PTPRN2;SYK;EFNA5;SRCIN1	AMP binding	1	0.0316593	CYB5R3	regulation of anatomical structure morphogenesis	61	0.00292375	CDH5;ULK2;RAB21;HMGB1;PALM;ESR1;FBXW8;MAPK14;PAK3;CYBB;THBS2;TRIOBP;VEGFA;PML;SMAD4;UST;DPYSL2;WNT3;PAX2;AGO2;MYH14;CALR;CFL1;NTN1;CCL11;PROX1;PLCG1;CRB2;NPR1;BASP1;PARVA;CAPRIN1;SRF;DVL1;SPRED1;RAP1A;WNT9B;EEF2K;LIMS1;AP2M1;GDI1;EFNA3;MKLN1;STK11;TBXA2R;TNFSF14;TGFBR1;E2F2;FITM2;BMPR2;MYLK3;HIF1AN;MIEF1;ADM2;ZNF135;SEMA5A;VASH1;EFNA5;PLXNA3;EHD1;PLXND1	positive regulation of endopeptidase activity	4	0.0242584	CYCS;RHOA;PPM1F;EPHA4	positive regulation of cell differentiation	32	0.015009	MYB;HMGB1;RPS6KA3;BMPR2;XRCC2;EEF2K;MYLK3;NFATC2;BMP7;LIMS1;ARNT;CRK;SYAP1;IL6R;SEMA5A;FGFR1;HEYL;VHL;EFNB2;CACNG7;BTK;BCL6;ETS1;LIMK1;TRIM67;GATA2;TGFBR1;BHLHB9;STK4;ACVR1B;BNIP2;NPNT	cellular response to reactive oxygen species	6	0.0123146	SOD2;MAPK13;FXN;ETS1;FER;PRKAA1
response to glucose	7	0.0057604	HNF4A;LDHA;ZBTB20;RAB11B;SMAD2;PTPRN2;EFNA5	oxidoreductase activity, acting on NAD(P)H, heme protein as acceptor	1	0.0316593	CYB5R3	regulation of vesicle-mediated transport	35	0.00292869	ABL2;RAB21;HMGB1;RPH3AL;CAV1;VAMP2;VAMP1;VEGFA;REST;RAB7A;SDC4;CALR;RAB11B;RAB5C;RAB5B;DVL1;RAP1A;ITGA2;SAR1B;EEF2K;PRRT2;MAPK1;RAB15;RAB10;MKLN1;CAMK2A;SAR1A;AKT2;SYK;STX1B;BET1L;CD84;VPS41;EHD1;VAMP8	response to acid chemical	6	0.0246533	RHOA;CASTOR2;NTRK3;COL1A1;PRKAA1;IREB2	regulation of dephosphorylation	10	0.0150594	ENSA;GSK3B;FKBP1A;PPP1R3B;GNAI2;MTMR3;PPP1R26;MTMR9;PPP1R14C;NPNT	regulation of cell motility	19	0.0123738	MGAT5;HMGB1;SOD2;CAV1;MINK1;AGO2;ETS1;CD151;SNAI2;FER;NTRK3;PADI2;IL6R;GLUL;RREB1;COL1A1;PPM1F;C5orf30;IGF1R
DNA damage checkpoint	6	0.00588375	CNOT4;FOXN3;MDM4;BTG2;CNOT6L;PEA15	inositol 1,4,5 trisphosphate binding	1	0.0316593	TRPC3	negative regulation of programmed cell death	57	0.00295516	EPHB1;NONO;CCND2;CSNK2A1;CCR5;RNF144B;SOD2;CAV1;CDKN1A;STAMBP;DSTYK;SYVN1;ERC1;TPT1;MYOCD;VEGFA;YWHAZ;CDKN1B;LEF1;MDM4;RPS6KA3;DDR1;RARA;PAX2;BTG2;FKBP8;CFL1;SH3RF1;PRLR;MDM2;XIAP;UNC5B;ZNF268;MNT;PSME3;EEF2K;GRINA;YME1L1;TNFSF14;XRCC2;NTSR1;UFM1;AKT2;PLAC8;TP53;BAG1;TGFBR1;PIK3R1;HYPK;SEMA5A;KDM2B;TNFAIP8;PPIF;WNK3;MPZ;PAFAH2;DHCR24	vesicle-mediated transport to the plasma membrane	3	0.024757	ARL3;ARF1;SEC16A	Toxoplasmosis	7	0.0151942	IL10RB;IRAK4;CYCS;LDLR;IKBKG;GNAI2;MAPK1	nucleotide-excision repair	5	0.0124515	HMGB1;POLD3;GTF2H1;RNF111;DDB1
receptor tyrosine kinase binding	4	0.00592296	IRS1;PITPNM3;PIK3R2;PTPN14	L-Citrulline	1	0.0316593	PADI1	regulation of cell growth	30	0.00296596	CSNK2A1;ULK2;RAB21;CDKN1A;GJA1;MYOCD;VEGFA;PML;CDKN1B;LEF1;SMAD4;DPYSL2;RPS6KA3;DDR1;IGFBP4;WNT3;SESN2;NTN1;EI24;NPR1;SRF;GDI1;STK11;TP53;TGFBR1;BMPR2;SEMA5A;KDM2B;EFNA5;PLXNA3	regulation of TOR signaling	3	0.024757	FNIP1;CASTOR2;PRKAA1	myeloid leukocyte mediated immunity	21	0.015271	HMGB1;MAVS;RAB27A;KCMF1;IRAK4;F2RL1;HPSE;TSPAN14;BTK;GPI;PTGES2;EEF1A1;CBL;QSOX1;GATA2;CAB39;NFASC;LAMTOR1;RAB5B;MAPK1;CYB5R3	protein domain specific binding	16	0.012491	RPH3AL;SHISA9;SH3BP5;AR;CD3E;DDX6;SKI;SOCS7;HMGA2;PAG1;DDB1;DAZAP2;EPHA4;CASP2;QKI;OCLN
regulation of organelle organization	24	0.0060667	MET;BCL2;GMFB;MOAP1;MYOCD;RPS6KA5;CCNE2;SMAD4;SYT7;PHF19;ACTR3B;AKAP13;MTHFR;PRRT2;MIEF1;EFNA5;CEP97;CNOT6L;SDC4;SMG1;PIP4K2B;ANK1;USP7;GSK3B	regulation of anatomical structure size	4	0.0317969	AP2M1;ILK;TBXA2R;JMY	negative regulation of nucleic acid-templated transcription	72	0.00300367	NONO;KCNIP3;GATAD2A;HMGB1;ZNF417;CAV1;ESR1;CBX5;DKK3;NACC1;CREB1;RFX3;MYOCD;VEGFA;KDM5C;E2F5;PML;SUFU;HIC2;REST;NSD2;CDKN1B;RPS6KA5;LEF1;SMAD4;MDM4;RARA;CBX2;PAX2;TOB2;BTG2;CALR;PROX1;FGF9;MDM2;BASP1;BHLHE40;SRF;HES2;ZNF268;MNT;WWC1;HOXC8;NFX1;PTPN2;KAT7;SUV39H1;TSHZ2;LIMS1;TFDP2;ZNF154;ZNF485;CC2D1B;HEYL;PEX2;CNBP;TP53;MIER3;E2F2;ZBTB16;NFIC;SOX7;HIF1AN;ATF7IP;KDM2B;REL;BACH2;FOXE1;GLIS3;LCOR;PO…	Small cell lung cancer	3	0.024757	PIK3R2;CKS1B;CYCS	positive regulation of protein modification process	39	0.0152744	MYB;MAP3K2;HMGB1;MAVS;CDK9;BMPR2;TIRAP;BMP7;ARNT;CRK;DBF4;SYAP1;IL6R;F2RL1;DSTYK;ATG14;PRKAR2A;FGFR1;SAMD5;BCL6;PEA15;FAM107A;FKBP1A;IKBKG;GPRC5A;GNAI2;CDC14B;TGFBR1;CAB39;RIF1;MAP3K9;STK4;TYRO3;ACVR1B;GPR183;LAMTOR1;WNK3;MAPK1;NPNT	positive regulation of transferase activity	15	0.0125725	CAB39;HMGB1;CDKN1A;HMBOX1;TAOK1;STK4;TMEM189-UBE2V1;MINK1;NTRK3;HMGA2;IL6R;DAZAP2;EPHA4;FRS2;PRKAA1
molecular adaptor activity	7	0.00608769	IRS1;CAV1;AKAP13;LASP1;CBX5;PAG1;ANK1	peptidyl-serine phosphorylation	3	0.0323534	ILK;TGFBR1;PPM1F	apoptotic process	106	0.00303054	EPHB1;SHB;NONO;CCND2;KCNIP3;CSNK2A1;MAP3K9;CCR5;TMEM109;RNF144B;HMGB1;SOD2;CAV1;CDKN1A;STAMBP;PPP2R1B;ESR1;DSTYK;SYVN1;MAPK14;ERC1;PAK3;TPT1;CREB1;IL6R;MYOCD;VEGFA;PML;DYRK2;KREMEN1;YWHAZ;REST;RTN3;FXR1;CDKN1B;LEF1;VAV3;MDM4;LDHA;RPS6KA3;PLAGL2;PTPA;DDR1;RARA;RTKN;PAX2;BTG2;CALR;FKBP8;CFL1;SH3RF1;NTN1;PRLR;PLCG1;EI24;BBC3;MDM2;XIAP;UNC5B;ZNF268;MNT;STK4;PTPN2;PSME3;TARDBP;EEF2K;TIAL1;TFDP2;GRINA;…	microtubule-based process	10	0.0250608	TNPO1;TRIM58;ARL3;GNAI1;RHOA;TUBB;KIF6;HOOK3;PRKAA1;TRAF3IP1	positive regulation of molecular function	53	0.0153073	IRS1;MAP3K2;HMGB1;FXN;MAVS;CDK9;APOPT1;SOX7;TIRAP;LIMS1;CRK;DBF4;SYAP1;IL6R;GRIN2B;IRAK4;F2RL1;DSTYK;CYCS;ATG14;PRKAR2A;DCP1A;FGFR1;SAMD5;PLIN5;BCL2L11;SRGAP1;BTK;PEA15;GSK3B;ARID5B;FKBP1A;RALBP1;ADD2;PABPN1;IKBKG;GPRC5A;GNAI2;CDC14B;TGFBR1;CAB39;MAP3K9;DNAJC24;STK4;PMAIP1;MTMR9;HMBOX1;BNIP2;WNK3;RAN;MAPK1;PFKFB2;NPNT	glycerolipid metabolic process	12	0.0125995	FITM2;CAV1;PIGO;ETNK1;ESR1;PIP4K2C;LPCAT3;PIKFYVE;INSIG1;SOCS7;PLA2G12A;FRS2
negative regulation of T cell activation	5	0.00612149	HMGB1;PAG1;SDC4;SPN;IL2RA	tissue migration	3	0.0326447	TBXA2R;TGFBR1;PPM1F	cysteine-type endopeptidase inhibitor activity involved in apoptotic process	5	0.00304462	LEF1;RPS6KA3;XIAP;TNFSF14;TNFAIP8	regulation of kinase activity	11	0.0251241	PIK3R2;CKS1B;TAL1;RHOA;ATG13;NTRK3;PPM1F;EPHA4;DAZAP2;FRS2;PRKAA1	pathway-restricted SMAD protein phosphorylation	5	0.0154853	USP15;BMPR2;BMP7;TGFBR1;ACVR1B	positive regulation of transcription, DNA-templated	29	0.0126052	E2F6;HMGB1;MICAL2;FOXK2;HMBOX1;ZBED1;POU2F1;ELK4;REST;ESR1;NR2C2;AR;TMEM189-UBE2V1;AGO2;ETS1;NFIX;FSTL3;GTF2H1;SKI;REL;INSIG1;PADI2;RNF111;HMGA2;RREB1;COL1A1;PRKAA1;MTF1;SOX2
C-type lectin receptor signaling pathway	5	0.00612149	MAPKAPK2;CCL22;CALML3;PIK3R2;SYK	intrinsic apoptotic signaling pathway	3	0.0332314	PHLDA3;PPM1F;JMY	exocytic process	10	0.0030532	VAMP2;VAMP1;STX2;PRRT2;RAB15;RAB10;CAMK2A;SYK;STX1B;VAMP8	regulation of immune system process	16	0.0252182	FNIP1;BTLA;TRIM58;TNRC6B;PIK3R2;TNRC6C;TAL1;RHOA;AGO1;MOG;COL1A1;IFNAR2;PAG1;ZFP36L2;TRAF3IP1;AKIRIN1	regulation of toll-like receptor signaling pathway	5	0.0154853	HMGB1;TIRAP;F2RL1;LILRA2;TYRO3	regulation of chemokine production	4	0.0126692	HMGB1;TLR7;SNAI2;IL6R
anoikis	3	0.00629037	CAV1;BCL2;STK11	positive regulation of cellular protein metabolic process	8	0.0336552	MYB;UBE2N;ILK;TAOK1;TGFBR1;MAP3K9;PPM1F;RBMS3	negative regulation of cell cycle G1/S phase transition	11	0.00308837	CTDSPL;CDKN1A;PML;CDKN1B;MDM4;BTG2;CNOT6L;MDM2;TFDP2;ZNF655;TP53	positive regulation of transferase activity	9	0.0252998	CKS1B;TAL1;RHOA;ATG13;NTRK3;EPHA4;DAZAP2;FRS2;PRKAA1	fatty acid derivative biosynthetic process	6	0.015559	ACSL6;ELOVL5;PTGS1;GGT5;PTGES2;SCD	nucleotide-excision repair, DNA incision	3	0.0126957	POLD3;GTF2H1;DDB1
SH2 domain binding	3	0.00629037	IRS1;SYK;PAG1	negative regulation of circadian rhythm	1	0.0340536	SUV39H1	venous blood vessel development	4	0.003103	CCBE1;VEGFA;PROX1;BMPR2	cellular component disassembly	8	0.0253334	TRIM58;MRPS18B;VPS13D;TMOD2;ATG13;MRPS21;EPG5;EPHA4	regulation of cell killing	6	0.015559	PVR;CRK;CD1D;F2RL1;BCL2L11;CLEC12B	DNA damage response, detection of DNA damage	3	0.0126957	POLD3;HMGA2;DDB1
nucleocytoplasmic transport	10	0.00629848	KPNA6;PPP1R12A;AKAP13;PIK3R2;SYK;PTPN14;SMG1;RBM8A;XPO4;GSK3B	regulation of spindle checkpoint	1	0.0340536	GEN1	S-adenosylmethionine metabolic process	4	0.003103	MAT2A;MAT1A;MRI1;MTHFR	autophagosome organization	3	0.0254509	ULK1;ATG13;PIKFYVE	single-stranded RNA binding	6	0.015559	HMGB1;PNPT1;PIWIL1;RBM7;ATXN1;A1CF	regulation of intrinsic apoptotic signaling pathway in response to DNA damage	3	0.0126957	SNAI2;BID;SKIL
cellular response to follicle-stimulating hormone stimulus	2	0.00633439	EFNA5;HMGCS1	regulation of mitotic cell cycle spindle assembly checkpoint	1	0.0340536	GEN1	negative regulation of RNA biosynthetic process	72	0.00312762	NONO;KCNIP3;GATAD2A;HMGB1;ZNF417;CAV1;ESR1;CBX5;DKK3;NACC1;CREB1;RFX3;MYOCD;VEGFA;KDM5C;E2F5;PML;SUFU;HIC2;REST;NSD2;CDKN1B;RPS6KA5;LEF1;SMAD4;MDM4;RARA;CBX2;PAX2;TOB2;BTG2;CALR;PROX1;FGF9;MDM2;BASP1;BHLHE40;SRF;HES2;ZNF268;MNT;WWC1;HOXC8;NFX1;PTPN2;KAT7;SUV39H1;TSHZ2;LIMS1;TFDP2;ZNF154;ZNF485;CC2D1B;HEYL;PEX2;CNBP;TP53;MIER3;E2F2;ZBTB16;NFIC;SOX7;HIF1AN;ATF7IP;KDM2B;REL;BACH2;FOXE1;GLIS3;LCOR;PO…	transition metal ion binding	13	0.0254649	MGAT5;S100A7A;TRIM58;SF3A3;NR3C1;SRSF7;TRIM65;GALNT2;TRIM67;PIKFYVE;CYP20A1;SAP30L;SIAH2	cellular component morphogenesis	36	0.0157439	DCC;B3GNT2;PNPT1;PANK2;BMPR2;PIKFYVE;NYAP2;CABP4;EEF2K;MYLK3;BMP7;LIMS1;CRK;SEMA3E;ZNF135;SEMA5A;VHL;EFNB2;CACNG7;BCL6;LIMK1;GSK3B;SDC2;CDC42SE1;BHLHB9;RILPL1;COL4A3BP;NFASC;ZMYM1;STK4;TYRO3;FMNL2;PITPNA;NFIB;MAPK1;CLIC4	protein phosphatase inhibitor activity	3	0.0126957	MGAT5;PPP1R1A;ARPP19
cardiac muscle cell myoblast differentiation	2	0.00633439	MYOCD;REST	regulation of mitotic spindle checkpoint	1	0.0340536	GEN1	viral process	46	0.00313683	DDX6;PABPN1;CD55;CCR5;HACD3;CAV1;CBX5;PSMB5;ABI2;CRTC1;PPIA;CREB1;NUP43;PML;GRB2;EIF4H;REST;RTN3;LEF1;VPS37B;RAB7A;FKBP8;CFL1;PROX1;PLCG1;MDM2;PDE12;ITGA2;NFX1;TARDBP;SUV39H1;AP2M1;MAPK1;RNF216;RAB11FIP4;ZC3HAV1;MCTS1;TP53;SYK;CCNT1;PIK3R1;LARP1;POLR2E;ATF7IP;RAB43;VAMP8	regulation of hematopoietic progenitor cell differentiation	2	0.0255563	FNIP1;TAL1	nucleobase-containing compound catabolic process	21	0.0158399	HMGB1;DFFA;PNPT1;DIS3L;TIRAP;SMG1;ARNT;DHTKD1;DCP1A;CACNG7;GPI;RBM8A;PFKFB3;BTG2;ENTPD5;GEN1;PGM2L1;ZC3H12D;TNRC6B;PFKFB2;NUP214	regulation of phosphorylation	29	0.0127118	CAB39;HMGB1;CAV1;CTDSPL;CDKN1A;TLR7;SH3BP5;TAOK1;STK4;WNT9B;AR;CD3E;TMEM189-UBE2V1;MINK1;GTF2H1;FER;NTRK3;SOCS7;HMGA2;IL6R;PPM1F;DAZAP2;EPHA4;FRS2;PRKAA1;TRAF3IP1;SOX2;IGF1R;CDK2AP1
micro-ribonucleoprotein complex	2	0.00633439	TNRC6B;TNRC6A	UV-damage excision repair	1	0.0340536	GEN1	regulation of body fluid levels	34	0.00315208	SH2B3;P2RX3;CAV1;VAMP2;CBX5;F2RL3;CREB1;VEGFA;BLOC1S3;YWHAZ;VAV3;HPS4;DDR1;SLC29A1;PRLR;NPR1;ADCY6;SRF;ITGA2;MAFF;AK3;FLG2;MAPK1;ADCY2;TBXA2R;SYK;PIK3R1;PRKAR2A;HPSE;WNK3;GPAT4;PAFAH2;EHD1;VAMP8	porphyrin-containing compound metabolic process	2	0.0255563	COX10;IREB2	regulation of B cell activation	7	0.0158808	IKZF3;TIRAP;NFATC2;BTK;BCL6;RIF1;GPR183	negative regulation of nervous system development	9	0.0127634	REST;DDX6;RAP1GAP2;SKI;NTRK3;HOOK3;EPHA4;TRAF3IP1;SOX2
I-SMAD binding	2	0.00633439	SMAD4;SMAD2	regulation of sphingolipid biosynthetic process	1	0.0340536	ORMDL3	mammary gland epithelium development	9	0.00316504	ESR1;PGR;PML;DDR1;WNT3;NTN1;CCL11;MAPK1;AKT2	embryonic camera-type eye development	2	0.0255563	FRS2;TRAF3IP1	positive regulation of catalytic activity	44	0.0159688	IRS1;MAP3K2;HMGB1;FXN;APOPT1;SOX7;TIRAP;LIMS1;CRK;DBF4;SYAP1;IL6R;GRIN2B;F2RL1;DSTYK;CYCS;ATG14;PRKAR2A;DCP1A;FGFR1;SAMD5;PLIN5;BCL2L11;SRGAP1;PEA15;GSK3B;RALBP1;PABPN1;IKBKG;GPRC5A;GNAI2;CDC14B;TGFBR1;CAB39;MAP3K9;DNAJC24;STK4;PMAIP1;MTMR9;HMBOX1;BNIP2;MAPK1;PFKFB2;NPNT	positive regulation of cell-cell adhesion	8	0.0127979	HMGB1;CAV1;CD3E;ETS1;MYO10;FSTL3;IL6R;SOX2
protein serine/threonine phosphatase inhibitor activity	2	0.00633439	PPP1R1A;PPP1R11	regulation of membrane lipid metabolic process	1	0.0340536	ORMDL3	negative regulation of mRNA metabolic process	9	0.00316504	MAPK14;CELF4;IGF2BP1;SRSF10;PKP1;MAPKAPK2;TARDBP;CCNT1;LARP1	neuron projection	15	0.0258449	STAR;SV2B;ORAI2;ARL3;ULK1;ARF1;RHOA;TMOD2;NTRK3;KCNB1;RBM8A;EPHA4;PRKAA1;IREB2;SIAH2	response to nutrient levels	19	0.0159884	BMPR2;G6PC;SIK2;BMP7;ENSA;PSPH;ATG14;LRAT;LDLR;SLC38A2;FAM107A;TRPC3;CBL;HMGCS1;GNAI2;MTMR3;PMAIP1;MAPK1;CHSY1	cellular response to increased oxygen levels	2	0.012854	CAV1;DNMT3B
cytoplasmic side of plasma membrane	6	0.00648279	PALM;ERRFI1;NPTXR;GNG3;CBX6;ANK1	regulation of ceramide biosynthetic process	1	0.0340536	ORMDL3	protein N-linked glycosylation	9	0.00316504	ALG9;SYVN1;MGAT4A;ALG1;UGGT1;MGAT5B;MAGT1;ST3GAL1;UBE2G2	regulation of actin filament organization	5	0.0268343	ARF1;RHOA;TMOD2;PPM1F;JMY	RNA localization	11	0.0162412	PNPT1;SMG1;PHAX;TERF1;RBM8A;NCBP3;PABPN1;QKI;RAN;YTHDC1;NUP214	miRNA mediated inhibition of translation	2	0.012854	AGO3;AGO2
transcription regulatory region sequence-specific DNA binding	17	0.00649209	HNF4A;RFX3;MYOCD;REST;LEF1;SMAD4;MYCN;POU2F1;ZHX3;SATB2;SMAD2;ELK1;MNT;HEYL;HES2;ZNF704;NFIC	endolysosome membrane	1	0.0340536	AP2M1	mammary gland morphogenesis	7	0.00317664	CAV1;ESR1;PGR;PML;DDR1;NTN1;CCL11	regulation of protein localization	12	0.027166	FFAR4;PIK3R2;ARF1;GNAI1;PTPN14;TRIM67;ATG13;INSIG1;KCNB1;PPM1F;SEC16A;PRKAA1	purine ribonucleotide metabolic process	19	0.0163026	PDK1;FXN;PANK2;ARNT;PDP2;THEM4;DHTKD1;CYCS;PANK3;ACSL6;ELOVL5;GPI;PFKFB3;HMGCS1;ENTPD5;PGM2L1;SCD;RAN;PFKFB2	negative regulation of translation, ncRNA-mediated	2	0.012854	AGO3;AGO2
cell cycle G1/S phase transition	8	0.00653625	CNOT4;BCL2;CDK6;CCNE2;MDM4;PSME3;BTG2;CNOT6L	melanosome membrane	1	0.0340536	OCA2	cell-substrate junction	30	0.00318517	TNS1;DCTN4;HACD3;RAB21;CAV1;GJA1;PPIA;TRIOBP;YWHAZ;PPP1R12A;ADD1;SDC4;LASP1;CALR;CFL1;ARHGAP31;PARVA;ITGA2;ITGA3;MCAM;LIMS1;MAPK1;NFASC;RAB10;MPRIP;TLN2;PRKAR2A;STX16;NHS;LPP	positive regulation of actin filament polymerization	3	0.0275951	ARF1;RHOA;JMY	activation of protein kinase activity	14	0.0163997	MAP3K2;HMGB1;TIRAP;CRK;IL6R;PRKAR2A;PEA15;IKBKG;GPRC5A;TGFBR1;CAB39;MAP3K9;STK4;MAPK1	regulation of translation, ncRNA-mediated	2	0.012854	AGO3;AGO2
response to hexose	7	0.00660442	HNF4A;LDHA;ZBTB20;RAB11B;SMAD2;PTPRN2;EFNA5	chitosome	1	0.0340536	OCA2	cytoplasmic vesicle membrane	48	0.0032013	SURF4;CD55;ULK2;RAB21;CACNG8;RPH3AL;CAV1;VAMP2;VAMP1;NFAM1;GOSR2;CYBB;SIGLEC14;PHACTR2;SLC6A17;RAB7A;WNT3;RPH3A;CALR;RAB11B;RAB5C;RAB5B;MDM2;PKP1;CAMK2G;RAP1A;SAR1B;IYD;SNX22;MAGT1;PRRT2;AP2M1;NFASC;RAB10;CAMK2A;SAR1A;TSPAN14;GDE1;VOPP1;TPRG1L;STX6;RAB11FIP1;MLEC;RAB43;CD68;VAMP8;SNX9;TMED10	RNA catabolic process	6	0.027624	TNPO1;TNRC6B;TNRC6C;AGO1;RBM8A;ZFP36L2	nucleocytoplasmic transport	15	0.0164407	MAVS;SMG1;PTPN14;PHAX;BCL6;GSK3B;RBM8A;PABPN1;RANBP6;ATXN1;RAN;MAPK1;YTHDC1;UHMK1;NUP214	regulation of sphingolipid biosynthetic process	2	0.012854	SAMD8;PRKAA1
actin-based cell projection	7	0.00660442	PALM;NPTXR;ITGA3;NFASC;SRCIN1;SPN;CBX6	pigment granule membrane	1	0.0340536	OCA2	myeloid cell activation involved in immune response	37	0.0032391	SURF4;CD55;HMGB1;VAMP2;NFAM1;MAPK14;CYBB;PPIA;SIGLEC14;PTGES2;PDXK;RAB7A;RAB5C;RAB5B;PKP1;GM2A;RAP1A;ADA2;MAGT1;FLG2;MAPK1;NFASC;RAB10;COMMD9;TSPAN14;PLAC8;SYK;QSOX1;HPSE;PGAM1;CD84;MLEC;METTL7A;CD68;CAB39;VAMP8;PAFAH1B2	neurotrophin signaling pathway	2	0.0281889	NTRK3;FRS2	regulation of glycolytic process	4	0.0165149	ARNT;PFKFB3;ENTPD5;PFKFB2	regulation of membrane lipid metabolic process	2	0.012854	SAMD8;PRKAA1
mitotic DNA integrity checkpoint	5	0.00662721	CNOT4;FOXN3;MDM4;BTG2;CNOT6L	nitric-oxide synthase binding	1	0.0340536	ACTB	endocytic vesicle	23	0.00325283	CACNG8;CAV1;CYBB;RAB7A;WNT3;CALR;RAB11B;RAB5C;RAB5B;MDM2;PIK3C2B;CAMK2G;RAP1A;HEATR5A;AP2M1;RAB10;CAMK2A;RAB11FIP4;SYK;STX6;RAB11FIP1;RAB43;VAMP8	regulation of vacuole organization	2	0.0281889	ULK1;PIKFYVE	activin receptor signaling pathway	4	0.0165149	BMPR2;FKBP1A;TGFBR1;ACVR1B	regulation of ceramide biosynthetic process	2	0.012854	SAMD8;PRKAA1
nuclear transport	10	0.0066699	KPNA6;PPP1R12A;AKAP13;PIK3R2;SYK;PTPN14;SMG1;RBM8A;XPO4;GSK3B	activin binding	1	0.0340536	TGFBR1	epithelial cell development	18	0.00330262	CDH5;CDKN1A;ESR1;STC1;TRIOBP;RFX3;PGR;CDK6;PPP1R12A;ADD1;RARA;PROX1;RAP1A;S1PR2;FEM1B;VSIG1;GPAT4;YIPF6	receptor inhibitor activity	2	0.0281889	MTRNR2L1;LRPAP1	protein serine/threonine/tyrosine kinase activity	4	0.0165149	TESK2;DSTYK;MAP3K9;MAPK1	negative regulation of interferon-beta production	2	0.012854	REL;TRAF3IP1
protein localization to cell periphery	9	0.00668855	CAV1;PALM;ZDHHC22;IQSEC2;RTKN;ITGA3;NFASC;TSPAN14;ANK1	3'-5'-exodeoxyribonuclease activity	1	0.0340536	GEN1	vesicle membrane	49	0.00335155	SURF4;CD55;ULK2;RAB21;CACNG8;RPH3AL;CAV1;VAMP2;VAMP1;NFAM1;GOSR2;CYBB;SIGLEC14;GRB2;PHACTR2;SLC6A17;RAB7A;WNT3;RPH3A;CALR;RAB11B;RAB5C;RAB5B;MDM2;PKP1;CAMK2G;RAP1A;SAR1B;IYD;SNX22;MAGT1;PRRT2;AP2M1;NFASC;RAB10;CAMK2A;SAR1A;TSPAN14;GDE1;VOPP1;TPRG1L;STX6;RAB11FIP1;MLEC;RAB43;CD68;VAMP8;SNX9;TMED10	midbody	4	0.0282697	ARL3;GNAI1;RHOA;ANXA11	regulation of transferase activity	32	0.0165314	IRS1;MAP3K2;HMGB1;TIRAP;BMP7;CRK;DBF4;SYAP1;IL6R;DSTYK;ATG14;PRKAR2A;FGFR1;SAMD5;TERF1;LIMK1;PEA15;GSK3B;CBL;PABPN1;IKBKG;GPRC5A;CDC14B;TGFBR1;CAB39;MAP3K9;STK4;SOCS7;HMBOX1;MAPK1;PFKFB2;MLLT1	regulation of steroid metabolic process	5	0.0129098	ACACA;REST;SNAI2;INSIG1;PRKAA1
double-stranded DNA binding	19	0.0066942	HMGB1;HNF4A;RFX3;MYOCD;REST;LEF1;SMAD4;MYCN;POU2F1;GTF2H5;ZHX3;SATB2;SMAD2;ELK1;MNT;HEYL;HES2;ZNF704;NFIC	mRNA 3'-UTR AU-rich region binding	1	0.0340536	RBMS3	Axon guidance	16	0.00349257	EPHB1;PAK3;DPYSL2;CFL1;NTN1;PLCG1;UNC5B;CAMK2G;EFNA3;MAPK1;CAMK2A;PIK3R1;BMPR2;SEMA5A;EFNA5;PLXNA3	cellular response to oxygen-containing compound	13	0.0283196	STAR;NR3C1;PIK3R2;GNAI1;RHOA;CASTOR2;INSIG1;NTRK3;KCNB1;COL1A1;EPHA4;PRKAA1;IREB2	positive regulation of lymphocyte activation	12	0.016552	MYB;HMGB1;TIRAP;NFATC2;IL6R;CD1D;TMIGD2;EFNB2;BTK;BCL6;RIF1;GPR183	protein deacylation	5	0.0129098	ELK4;REST;SKI;SAP30L;PRKAA1
positive regulation of protein phosphorylation	20	0.00670017	HMGB1;CAV1;MET;BCL2;IL6R;RPS6KA5;SMAD4;AKAP13;IGFBP4;GNG3;MAPKAPK2;DIRAS2;CCL22;MAP4K2;STK11;SYK;EFNA5;SDC4;SRCIN1;PEA15	icosanoid receptor activity	1	0.0340536	TBXA2R	regulation of RNA stability	13	0.0035466	SAMD4A;MAPK14;CARHSP1;IGF2BP1;YWHAZ;FXR1;CNOT6L;MAPKAPK2;PDE12;TARDBP;SERBP1;METTL14;LARP1	cytoskeleton-dependent cytokinesis	3	0.0283307	ARL3;ARF1;RHOA	regulation of lymphocyte mediated immunity	8	0.0165801	HMGB1;PVR;CRK;CD1D;BTK;BCL6;RIF1;CLEC12B	tube development	21	0.0131776	HMGB1;CAV1;MICAL2;CDKN1A;CRISPLD2;ESR1;STK4;WNT9B;MTHFR;AR;AGO2;MTDH;ETS1;FSTL3;SKI;SLC4A2;HMGA2;GLUL;BTG1;EPHA4;TRAF3IP1
glucose metabolic process	7	0.00678371	H6PD;IRS1;HMGB1;ARPP19;IGFBP4;PHKG2;GSK3B	cellular protein catabolic process	5	0.0343385	USP15;UBE2Z;AP2M1;UBE2N;DDA1	carbohydrate derivative biosynthetic process	46	0.00357907	MTAP;DHFR2;UGCG;ALG9;SYVN1;BACE2;A4GALT;PDK3;PRPS1;NDST1;NME4;MGAT4A;UST;LDHA;SDC4;PDPR;SOAT1;SORD;NPR1;ADCY6;AMDHD2;ADA2;ALG1;GNE;PIGX;UGGT1;MGAT5B;MAGT1;ST3GAL2;CHST6;GALNT6;ST3GAL1;AK3;UBE2G2;ADCY2;PRELP;HACD2;GK5;ACACA;PRPSAP1;PGAM1;BMPR2;KDELC2;PDP2;GNPNAT1;DHTKD1	regulation of mRNA splicing, via spliceosome	3	0.0283307	SRSF7;RBM8A;MBNL3	regulation of histone modification	8	0.0165801	MYB;CDK9;KDM5A;CTCFL;BCL6;GATA2;RIF1;SETD7	positive regulation of NIK/NF-kappaB signaling	4	0.0132753	HMGB1;TLR7;AGO3;LIMS1
regulation of symbiosis, encompassing mutualism through parasitism	7	0.00678371	CAV1;PPIA;BCL2;REST;LEF1;VPS37B;LARP1	positive regulation of cell-substrate adhesion	2	0.0343953	ILK;PPM1F	plasma membrane bounded cell projection morphogenesis	42	0.00358376	TSKU;EPHB1;ULK2;RNF165;RAB21;FBXW8;PAK3;CREB1;VEGFA;GRB2;RPS6KA5;SMAD4;UST;DPYSL2;DDR1;WNT3;PAX2;CFL1;NTN1;PLCG1;CAPRIN1;UNC5B;SRF;DVL1;EEF2K;GDI1;EFNA3;MAPK1;NFASC;RAB10;CAMK2A;STK11;SLC11A2;MYPN;PIK3R1;BMPR2;NYAP2;SEMA5A;EFNA5;PLXNA3;PLXND1;RAPH1	transferase complex, transferring phosphorus-containing groups	5	0.0284701	PIK3R2;ULK1;CKS1B;ATG13;PRKAA1	ribose phosphate metabolic process	20	0.0167178	PDK1;FXN;PANK2;H6PD;ARNT;PDP2;THEM4;DHTKD1;CYCS;PANK3;ACSL6;ELOVL5;GPI;PFKFB3;HMGCS1;ENTPD5;PGM2L1;SCD;RAN;PFKFB2	repressing transcription factor binding	4	0.0132753	TCERG1;HMGB1;SKI;CBX5
positive T cell selection	3	0.00682446	BCL2;STK11;SPN	renal system development	3	0.0344214	ILK;TGFBR1;ARID5B	regulation of anatomical structure size	34	0.00358602	ULK2;RAB21;SOD2;CAV1;ABI2;PAK3;TRIOBP;CREB1;VEGFA;GRB2;VAV3;ADD1;DPYSL2;WNT3;PEX11B;PAX2;CFL1;NTN1;CCL11;NPR1;ADCY6;SRF;FMN1;WNT9B;ECE1;AP2M1;GDI1;TBXA2R;BMPR2;SEMA5A;WIPF3;EFNA5;SLC12A3;PLXNA3	regulation of small molecule metabolic process	6	0.0286648	STAR;ADIPOR2;RHOA;NCOR2;INSIG1;PRKAA1	hematopoietic or lymphoid organ development	29	0.0167453	MYB;HMGB1;IKZF3;TIRAP;NFATC2;ARNT;POU2F2;CD1D;DHTKD1;F2RL1;BCL2L11;BTK;BCL6;ETS1;ONECUT1;CD109;ADD2;ATXN1L;GATA2;TGFBR1;KLF13;STK4;TYRO3;ACVR1B;GPR183;TNRC6B;MAPK1;KLF6;SGPL1	phosphatidylinositol phosphorylation	5	0.0133793	ESR1;PIP4K2C;PIKFYVE;SOCS7;FRS2
embryonic axis specification	3	0.00682446	SMAD4;BASP1;SMAD2	double-strand break repair via homologous recombination	2	0.0349291	UBE2N;GEN1	negative regulation of myeloid leukocyte differentiation	7	0.00359759	CDK6;RARA;TOB2;PTPN2;FSTL3;PIK3R1;GPR55	regulation of circadian rhythm	3	0.0290766	CRY2;PRKAA1;SIAH2	B cell apoptotic process	3	0.0168555	BCL2L11;BTK;BCL6	macromolecule deacylation	5	0.0133793	ELK4;REST;SKI;SAP30L;PRKAA1
response to hypoxia	9	0.00682947	CAV1;BCL2;MYOCD;REST;SMAD4;MDM4;LDHA;STC2;MTHFR	purine ribonucleotide binding	9	0.0349305	ACTB;RAB15;UBE2Z;UBE2N;ILK;TAOK1;TGFBR1;MAP3K9;CYB5R3	lactation	7	0.00359759	CAV1;CREB1;VEGFA;DDR1;SLC29A1;PRLR;GPAT4	vesicle budding from membrane	3	0.0290766	ARF1;INSIG1;SEC16A	positive regulation of activated T cell proliferation	3	0.0168555	HMGB1;IL6R;TMIGD2	nuclear chromosome	14	0.0134183	HMGB1;HMBOX1;ZBED1;ESR1;AGO3;POLD3;SUV39H1;AR;ETV3;SNAI2;FER;HMGA2;CBX5;DDB1
polysaccharide metabolic process	5	0.00689074	PPP1R1A;IRS1;HMGB1;PHKG2;GSK3B	macromolecule methylation	3	0.0350247	MYB;SUV39H1;MEN1	positive regulation of protein serine/threonine kinase activity	25	0.00360741	CCND2;MAP3K9;HACD3;MAPK14;PAK3;VEGFA;CDKN1B;DUSP9;GNG3;PROX1;MAPKAPK2;STK4;DIRAS2;SYAP1;MAPK1;UBE2N;MAP4K2;MAPK8IP3;S1PR2;SYK;TGFBR1;CCNT1;SAMD5;TAOK1;CAB39	regulation of actin polymerization or depolymerization	4	0.0293306	ARF1;RHOA;TMOD2;JMY	glucose 6-phosphate metabolic process	3	0.0168555	G6PC;H6PD;GPI	Proteoglycans in cancer	7	0.0134901	CAV1;CDKN1A;ESR1;WNT9B;MAPK13;FRS2;IGF1R
positive regulation of cellular protein metabolic process	28	0.00689133	HMGB1;CAV1;MET;BCL2;IL6R;REST;FXR1;RPS6KA5;PPP1R12A;SMAD4;PHF19;AKAP13;IGFBP4;GNG3;MAPKAPK2;DIRAS2;PSME3;CCL22;MAP4K2;STK11;SYK;LARP1;EFNA5;SDC4;BCL2L13;SRCIN1;PEA15;GSK3B	regulation of cellular protein localization	4	0.0354085	ACTB;AP2M1;UBL5;PPM1F	neuron projection extension	15	0.00363767	ULK2;RAB21;VEGFA;DPYSL2;DDR1;WNT3;NTN1;SRF;DVL1;GDI1;STK11;BMPR2;SEMA5A;PLXNA3;RAPH1	actin filament polymerization	4	0.0293306	ARF1;RHOA;TMOD2;JMY	sterol import	2	0.0169065	LDLR;LAMTOR1	regulation of anatomical structure morphogenesis	21	0.0135917	FITM2;RAB21;HMGB1;PALM;ESR1;WNT9B;AR;AGO2;MTDH;ETS1;MYO10;SNAI2;LIMS1;SKIL;NTRK3;HMGA2;GLUL;BTG1;RREB1;EPHA4;FRS2
regulation of cell cycle G1/S phase transition	6	0.00712499	CNOT4;BCL2;MDM4;PSME3;BTG2;CNOT6L	recombinational repair	2	0.0354663	UBE2N;GEN1	endocytic vesicle membrane	15	0.00363767	CACNG8;CAV1;CYBB;RAB7A;WNT3;CALR;RAB11B;MDM2;CAMK2G;AP2M1;RAB10;CAMK2A;RAB11FIP1;RAB43;VAMP8	regulation of multicellular organismal development	20	0.0293816	FNIP1;STAR;TRIM58;TNRC6B;TNRC6C;ARF1;TAL1;RHOA;AGO1;TRIM67;SKIL;NTRK3;HOOK3;COL1A1;ZFP36L2;EPHA4;FRS2;PRKAA1;TRAF3IP1;AKIRIN1	cholesterol import	2	0.0169065	LDLR;LAMTOR1	positive regulation of cell differentiation	20	0.0136007	RAB21;METRNL;HMGB1;SOD2;REST;STK4;AR;DNMT3B;ETS1;SNAI2;LIMS1;SKIL;NTRK3;IL6R;BTG1;RREB1;CCDC71L;COL1A1;EPHA4;SOX2
regulation of phosphoprotein phosphatase activity	5	0.00716151	PPP1R1A;PPP1R11;PPP1R12A;ARPP19;GSK3B	endosomal part	4	0.0362918	RAB15;AP2M1;OCA2;STAM	Cellular senescence	15	0.00363767	CCND2;CDKN1A;MAPK14;E2F5;CDK6;CCNE2;MDM2;MAPKAPK2;MAPK1;CALML3;AKT2;TP53;TGFBR1;E2F2;PIK3R1	TORC1 signaling	2	0.0295444	FNIP1;CASTOR2	interferon-alpha secretion	2	0.0169065	HMGB1;MAVS	positive regulation of protein acetylation	3	0.0136007	TAOK1;SNAI2;PRKAA1
limbic system development	5	0.00716151	CDK6;LEF1;BTG2;EMX2;GSK3B	negative regulation of cell migration involved in sprouting angiogenesis	1	0.0364421	TBXA2R	vascular smooth muscle cell differentiation	5	0.00367374	SOD2;MYOCD;VEGFA;FGF9;SRF	intraciliary transport involved in cilium assembly	2	0.0295444	TNPO1;TRAF3IP1	regulation of interferon-alpha secretion	2	0.0169065	HMGB1;MAVS	dendrite membrane	3	0.0136007	SHISA9;PALM;KCNB1
Epstein-Barr virus infection	7	0.00734332	BCL2;CDK6;CCNE2;HLA-C;PIK3R2;SYK;USP7	positive regulation of exosomal secretion	1	0.0364421	STAM	branching involved in mammary gland duct morphogenesis	5	0.00367374	ESR1;PGR;PML;DDR1;CCL11	regulation of synaptic plasticity	4	0.0298699	STAR;ARF1;KCNB1;EPHA4	positive regulation of interferon-alpha secretion	2	0.0169065	HMGB1;MAVS	peripheral nervous system development	4	0.0138996	ADAM22;NCMAP;SKI;NTRK3
regulation of T cell proliferation	6	0.00734894	HMGB1;IL6R;SYK;SDC4;SPN;IL2RA	AP-2 adaptor complex	1	0.0364421	AP2M1	RNA polymerase II preinitiation complex assembly	5	0.00367374	HMGB1;ESR1;CREB1;TP53;ATF7IP	regulation of actin filament length	4	0.0298699	ARF1;RHOA;TMOD2;JMY	outer ear morphogenesis	2	0.0169065	FGFR1;MAPK1	positive regulation of catalytic activity	27	0.0139093	OPHN1;CAB39;HMGB1;CAV1;CDKN1A;HMBOX1;REST;ESR1;TAOK1;STK4;WNT9B;TMEM189-UBE2V1;RAP1GAP2;MINK1;FXN;SNX18;LIMS1;BID;NTRK3;HMGA2;IL6R;PPM1F;DAZAP2;EPHA4;FRS2;PRKAA1;CHML
regulation of protein targeting to membrane	3	0.00738471	GDI1;MIEF1;TCAF1	nBAF complex	1	0.0364421	SMARCD1	cell projection morphogenesis	42	0.00368431	TSKU;EPHB1;ULK2;RNF165;RAB21;FBXW8;PAK3;CREB1;VEGFA;GRB2;RPS6KA5;SMAD4;UST;DPYSL2;DDR1;WNT3;PAX2;CFL1;NTN1;PLCG1;CAPRIN1;UNC5B;SRF;DVL1;EEF2K;GDI1;EFNA3;MAPK1;NFASC;RAB10;CAMK2A;STK11;SLC11A2;MYPN;PIK3R1;BMPR2;NYAP2;SEMA5A;EFNA5;PLXNA3;PLXND1;RAPH1	negative regulation of protein transport	4	0.0298699	FFAR4;INSIG1;KCNB1;PPM1F	regulation of acyl-CoA biosynthetic process	2	0.0169065	PDK1;PDP2	sulfur compound metabolic process	10	0.0140153	ACACA;MICAL2;MTHFR;NDOR1;PRELP;FXN;VCAN;IBA57;GLCE;AMD1
mRNA stabilization	3	0.00738471	MAPKAPK2;SYNCRIP;LARP1	transforming growth factor beta-activated receptor activity	1	0.0364421	TGFBR1	regulation of cell size	16	0.00369403	ULK2;RAB21;CREB1;VEGFA;VAV3;ADD1;DPYSL2;WNT3;NTN1;SRF;GDI1;BMPR2;SEMA5A;EFNA5;SLC12A3;PLXNA3	regulation of gene expression, epigenetic	5	0.0301681	TNRC6B;TNRC6C;AGO1;NCOR2;DOT1L	ncRNA export from nucleus	2	0.0169065	PHAX;RAN	negative regulation of cell death	21	0.0140161	RNF144B;SOD2;CAV1;CDKN1A;AREL1;UBE2Z;AR;GRINA;FXN;MTDH;SNAI2;BID;REL;NTRK3;LRPAP1;HMGA2;DDB1;EPHA4;CASP2;PRKAA1;IGF1R
leukocyte migration	11	0.00740042	HMGB1;CAV1;PPIA;IL6R;CCR5;ITGA3;CCL22;PIK3R2;SYK;SDC4;SPN	endodeoxyribonuclease activity, producing 5'-phosphomonoesters	1	0.0364421	GEN1	stress-induced premature senescence	3	0.00371045	CDKN1A;MAPK14;TP53	regulation of microtubule cytoskeleton organization	4	0.030415	GNAI1;RHOA;PRKAA1;TRAF3IP1	double-stranded telomeric DNA binding	2	0.0169065	TERF1;HMBOX1	cellular response to acid chemical	7	0.0141771	ACACA;WNT9B;CASTOR2;SESN3;NTRK3;COL1A1;PRKAA1
columnar/cuboidal epithelial cell differentiation	5	0.00743963	HNF4A;CDK6;RFX3;LEF1;GSK3B	phosphatidylinositol-5-phosphate binding	1	0.0364421	PHLDA3	positive regulation of axon guidance	3	0.00371045	VEGFA;BMPR2;SEMA5A	Axon guidance	4	0.030415	PIK3R2;GNAI1;RHOA;EPHA4	nuclear export signal receptor activity	2	0.0169065	RAN;NUP214	osteoblast differentiation	7	0.0141771	REST;SNAI2;SKI;VCAN;IL6R;COL1A1;SOX2
response to monosaccharide	7	0.00753725	HNF4A;LDHA;ZBTB20;RAB11B;SMAD2;PTPRN2;EFNA5	chromatin	4	0.0365146	ACTB;SUV39H1;MEN1;SMARCD1	cellular response to UV-B	3	0.00371045	CDKN1A;MFAP4;STK11	negative regulation of macromolecule biosynthetic process	16	0.0306029	FNIP1;ZHX3;NR3C1;CRY2;TNRC6B;TNRC6C;TAL1;AGO1;TXNIP;NCOR2;DOT1L;SKIL;PPM1F;ZFP36L2;IREB2;SIAH2	organophosphate biosynthetic process	24	0.0171643	IRS1;PDK1;PANK2;PIKFYVE;ARNT;PDP2;DHTKD1;FGFR1;PLA2G12A;PANK3;ACSL6;ELOVL5;GPI;PFKFB3;HMGCS1;MTMR3;ENTPD5;PGM2L1;MTMR9;CDIPT;SCD;MAPK1;PFKFB2;SAMD8	positive regulation of nucleobase-containing compound metabolic process	34	0.0142817	E2F6;TCERG1;HMGB1;MICAL2;FOXK2;HMBOX1;ZBED1;POU2F1;ELK4;REST;ESR1;NR2C2;AR;TMEM189-UBE2V1;AGO2;MTDH;ETS1;NFIX;FSTL3;GTF2H1;SKI;REL;INSIG1;PADI2;RNF111;HMGA2;RREB1;COL1A1;JMY;ZFP36L2;PRKAA1;CNOT6L;MTF1;SOX2
cellular response to electrical stimulus	2	0.00754591	PALM;REST	purine nucleotide binding	9	0.0365322	ACTB;RAB15;UBE2Z;UBE2N;ILK;TAOK1;TGFBR1;MAP3K9;CYB5R3	cardiac vascular smooth muscle cell differentiation	3	0.00371045	MYOCD;VEGFA;SRF	positive regulation of neuron differentiation	6	0.0308234	ARF1;RHOA;TRIM67;SKIL;NTRK3;EPHA4	B cell proliferation	6	0.0172149	IKZF3;TIRAP;NFATC2;BTK;BCL6;GPR183	regulation of locomotion	20	0.0143391	MGAT5;HMGB1;SOD2;CAV1;MINK1;AGO2;ETS1;CD151;SNAI2;FER;NTRK3;PADI2;IL6R;GLUL;RREB1;COL1A1;PPM1F;DDB1;C5orf30;IGF1R
negative regulation of protein autophosphorylation	2	0.00754591	CAV1;ERRFI1	ribonucleotide binding	9	0.0365322	ACTB;RAB15;UBE2Z;UBE2N;ILK;TAOK1;TGFBR1;MAP3K9;CYB5R3	regulation of acetyl-CoA biosynthetic process from pyruvate	3	0.00371045	PDK3;PDPR;PDP2	substantia nigra development	2	0.0309254	RHOA;SEC16A	regulation of mRNA catabolic process	8	0.0172249	PNPT1;TIRAP;DCP1A;CACNG7;BTG2;ZC3H12D;TNRC6B;NUP214	positive regulation of protein modification process	24	0.0143491	CAB39;HMGB1;CAV1;CDKN1A;TAOK1;STK4;AR;CD3E;TMEM189-UBE2V1;MINK1;DNMT3B;SPRTN;SNAI2;NTRK3;RNF111;HMGA2;IL6R;DAZAP2;EPHA4;FRS2;PRKAA1;SOX2;IGF1R;CDK2AP1
positive regulation of smooth muscle cell differentiation	2	0.00754591	SOD2;MYOCD	Platelet activation	2	0.0370969	ACTB;TBXA2R	regulation of programmed cell death	87	0.0037224	EPHB1;NONO;CCND2;CSNK2A1;MAP3K9;CCR5;RNF144B;HMGB1;SOD2;CAV1;CDKN1A;STAMBP;PPP2R1B;ESR1;DSTYK;SYVN1;ERC1;PAK3;TPT1;CREB1;MYOCD;VEGFA;PML;YWHAZ;REST;CDKN1B;LEF1;VAV3;MDM4;LDHA;RPS6KA3;PLAGL2;PTPA;DDR1;RARA;RTKN;PAX2;BTG2;CALR;FKBP8;CFL1;SH3RF1;PRLR;PLCG1;BBC3;MDM2;XIAP;UNC5B;ZNF268;MNT;STK4;PTPN2;PSME3;TARDBP;EEF2K;TFDP2;GRINA;YME1L1;SERBP1;FOSL1;CAMK2A;TNFSF14;IKZF3;XRCC2;NTSR1;UFM1;AKT2;PLAC8;TP…	RNA polymerase core enzyme binding	2	0.0309254	AGO1;ELP2	nuclear transport	15	0.0176063	MAVS;SMG1;PTPN14;PHAX;BCL6;GSK3B;RBM8A;PABPN1;RANBP6;ATXN1;RAN;MAPK1;YTHDC1;UHMK1;NUP214	alternative mRNA splicing, via spliceosome	4	0.0145423	MBNL3;REST;RSRC1;RBM8A
interleukin-2-mediated signaling pathway	2	0.00754591	SYK;IL2RA	negative regulation of catalytic activity	5	0.0380633	UBE2Z;MEN1;ILK;CD109;PPM1F	identical protein binding	95	0.00372535	SLC31A1;NONO;CDH5;CSNK2A1;MAP3K9;RHCG;C1QTNF6;SOD2;CAV1;ESR1;ALDH5A1;CBX5;SLC4A1;CREB1;PRPS1;PTK6;IL6R;VEGFA;TRA2B;PGR;CASC3;ESYT2;PML;GRB2;YWHAZ;OXSR1;NLGN2;DPP9;FXR1;SMAD4;PDXK;LDHA;ADD1;DPYSL2;HPS4;SDC4;PCYT1A;OLFML2A;PTPA;MAT2A;PEX11B;NRF1;FKBP8;MAT1A;PRLR;DNPEP;SORD;MDM2;XIAP;CFHR5;BHLHE40;CAMK2G;SRF;DVL1;ADA2;MRI1;STK4;PSME3;TARDBP;ECE1;QPRT;GPSM2;UBE2G2;MAPK1;OPTN;HEYL;MKLN1;ATL3;CISD2;CAM…	positive regulation of neurogenesis	7	0.0312544	STAR;ARF1;RHOA;TRIM67;SKIL;NTRK3;EPHA4	amide biosynthetic process	27	0.0178307	PDK1;RPS6KA3;RBM4B;EEF2K;TARS2;PIWIL1;PDP2;MCTS1;QRSL1;ACSL6;ELOVL5;GGT5;EEF1A1;RBM8A;BTG2;CELF1;TRMT10C;DNAJC24;ZC3H12D;QKI;SCD;TNRC6B;MAPK1;RMND1;MRPS10;UHMK1;SAMD8	regulation of intrinsic apoptotic signaling pathway	6	0.0146707	SOD2;CAV1;GRINA;SNAI2;BID;SKIL
macrophage activation involved in immune response	2	0.00754591	HMGB1;SYK	protein localization to cell periphery	3	0.0381238	ACTB;RAB15;AP2M1	tube formation	14	0.0037431	VEGFA;SUFU;SDC4;RARA;PAX2;CFL1;PROX1;DVL1;STK4;WNT9B;MTHFR;BCAS3;MTHFD1;KDM2B	negative regulation of establishment of protein localization	4	0.0315228	FFAR4;INSIG1;KCNB1;PPM1F	regulation of nucleotide catabolic process	4	0.017847	ARNT;PFKFB3;ENTPD5;PFKFB2	pre-miRNA processing	2	0.0147103	AGO3;AGO2
transferase complex, transferring phosphorus-containing groups	8	0.00768221	IRS1;CDK6;CCNE2;GTF2H5;RPRD2;PIK3R2;PHKG2;POLR2E	catecholamine uptake	1	0.0388249	ACTB	transcription factor binding	42	0.00378728	HMGB1;ESR1;CBX5;MAPK14;CRTC1;CREB1;MYOCD;E2F5;SUFU;YWHAZ;REST;LEF1;SMAD4;ADD1;RARA;PAX2;TOB2;CALR;PROX1;RORA;CHD4;BHLHE40;DHX33;SRF;BBS1;HES2;STK4;ELK1;TFDP2;MAPK1;HEYL;GTF2F1;BCAS3;TP53;MIER3;PIAS2;E2F2;CCNT1;PIK3R1;HIF1AN;NCAPG2;LCOR	nucleocytoplasmic transport	6	0.0319416	TNPO1;PIK3R2;SRSF7;TXNIP;PTPN14;RBM8A	Hepatitis B	8	0.0178876	MAVS;TIRAP;NFATC2;IFNAR1;CYCS;IKBKG;TGFBR1;MAPK1	S-adenosylmethionine metabolic process	2	0.0147103	MTHFR;AMD1
response to oxygen-containing compound	28	0.0076915	IRS1;HMGB1;SOD2;CAV1;HNF4A;MET;TPCN2;BCL2;ERRFI1;LDHA;CCR5;STC2;ZBTB20;RAB11B;MAPKAPK2;SMAD2;PTPRN2;SCD;MTHFR;ELK1;LDOC1;BTG2;PIK3R2;LARP1;EFNA5;GRAMD1B;HMGCS1;GSK3B	negative regulation of TORC1 signaling	1	0.0388249	CASTOR2	Relaxin signaling pathway	13	0.00379085	MAPK14;CREB1;VEGFA;GRB2;GNG3;ADCY6;GNB4;MAPK1;ADCY2;CREB3L2;AKT2;TGFBR1;PIK3R1	intrinsic apoptotic signaling pathway in response to DNA damage	3	0.0321637	MCL1;SKIL;CASP2	nucleoside diphosphate metabolic process	7	0.0180725	ARNT;DHTKD1;GPI;PFKFB3;ENTPD5;PGM2L1;PFKFB2	positive regulation of smooth muscle cell apoptotic process	2	0.0147103	SOD2;STK4
side of membrane	12	0.00775252	PALM;IL6R;ERRFI1;NPTXR;ANTXR2;CCR5;GNG3;ITGA3;EFNA5;CBX6;IL2RA;ANK1	ventricular trabecula myocardium morphogenesis	1	0.0388249	TGFBR1	cardiac septum morphogenesis	9	0.003826	NSD2;SMAD4;RARA;PROX1;MDM2;PARVA;HEYL;TGFBR1;BMPR2	regulation of protein kinase activity	10	0.0323282	CKS1B;TAL1;RHOA;ATG13;NTRK3;PPM1F;EPHA4;DAZAP2;FRS2;PRKAA1	clathrin-coated pit	5	0.0185629	LRP10;AP1S1;LDLR;EPS15L1;MYO6	RNA cap binding complex	2	0.0147103	AGO2;NCBP3
regulation of lymphocyte proliferation	7	0.00793644	HMGB1;BCL2;IL6R;SYK;SDC4;SPN;IL2RA	positive regulation of histone H3-K4 methylation	1	0.0388249	MYB	signal transduction involved in DNA integrity checkpoint	9	0.003826	CDKN1A;PML;CDKN1B;MDM4;BTG2;CNOT6L;MDM2;TFDP2;TP53	regulation of fatty acid biosynthetic process	2	0.0323315	ADIPOR2;INSIG1	B cell activation	11	0.018762	IKZF3;TIRAP;NFATC2;POU2F2;SKAP2;BTK;BCL6;ONECUT1;RIF1;GPR183;KLF6	phosphatidylinositol phosphate kinase activity	2	0.0147103	PIP4K2C;PIKFYVE
endocytic recycling	3	0.00797139	RAB11B;RAB11FIP4;STX6	positive regulation of glial cell proliferation	1	0.0388249	MYB	signal transduction involved in DNA damage checkpoint	9	0.003826	CDKN1A;PML;CDKN1B;MDM4;BTG2;CNOT6L;MDM2;TFDP2;TP53	Porphyrin and chlorophyll metabolism	2	0.0323315	MMAB;COX10	nucleobase-containing compound transport	11	0.018762	PNPT1;SMG1;SLC35B4;PHAX;RBM8A;NCBP3;PABPN1;QKI;RAN;YTHDC1;NUP214	transcription factor binding	15	0.014711	E2F6;TCERG1;HMGB1;REST;ESR1;STK4;AR;MTDH;ETS1;SKI;HES2;PADI2;HMGA2;CBX5;TOB2
presynapse	12	0.0079985	OPHN1;GRM7;SYT7;SLC6A17;RPH3A;RAB11B;RAB5B;PTPRN2;ELK1;PRRT2;CABP4;STX6	peptidyl-threonine dephosphorylation	1	0.0388249	PPM1F	intracellular protein transport	66	0.00385217	SURF4;KCNIP3;PABPN1;RPL28;KPNA6;RAB21;CACNG8;RPH3AL;VAMP2;SYVN1;MAPK14;UHMK1;GOSR2;STX2;NUP43;WDR33;CASC3;PML;SUFU;YWHAZ;AGK;CHCHD4;DDX19B;HPS4;RAB7A;RPH3A;CALR;RAB11B;RAB5C;FGF9;RAB5B;MDM2;RPS24;YOD1;SAR1B;TARDBP;AP2M1;GDI1;UBE2G2;PEX26;MAPK1;RAB15;RAB10;MAPK8IP3;SAR1A;BCAS3;AKT2;PEX2;TP53;RABGAP1L;SYK;FYTTD1;SSR1;STX1B;PIK3R1;ACOX1;STX16;MIEF1;STX6;VPS41;XPO5;RAB43;EHD1;PEX16;SNX9;TMED10	response to retinoic acid	3	0.0329612	NTRK3;COL1A1;IREB2	organonitrogen compound biosynthetic process	54	0.0188183	PDK1;RPS6KA3;ST3GAL1;B3GNT2;FXN;PANK2;BMPR2;UGGT1;RBM4B;TIRAP;EEF2K;GSTM3;TARS2;ARNT;PIWIL1;IBA57;PDP2;PSPH;MCTS1;DHTKD1;QRSL1;GFPT1;PANK3;ACSL6;ALG1;ELOVL5;GGT5;GPI;EEF1A1;SDC2;RBM8A;PFKFB3;BTG2;CELF1;TRMT10C;PPM1L;TMEM59;COL4A3BP;ENTPD5;DNAJC24;PGM2L1;ZC3H12D;QKI;SCD;TNRC6B;MAPK1;PFKFB2;RMND1;CHSY1;SGPL1;MRPS10;UHMK1;SAMD8;ASGR2	heterochromatin	4	0.0152034	SUV39H1;DDX6;HMGA2;CBX5
negative regulation of mRNA metabolic process	4	0.00807417	CELF4;MAPKAPK2;SYNCRIP;LARP1	chromatin silencing at rDNA	1	0.0388249	SUV39H1	regulation of cell morphogenesis involved in differentiation	23	0.00385279	ULK2;RAB21;FBXW8;PAK3;TRIOBP;VEGFA;UST;DPYSL2;WNT3;CALR;CFL1;NTN1;CAPRIN1;SRF;EEF2K;LIMS1;GDI1;STK11;BMPR2;SEMA5A;EFNA5;PLXNA3;PLXND1	post-Golgi vesicle-mediated transport	3	0.0329612	ARL3;ARF1;SEC16A	lymph vessel development	3	0.0188355	BMPR2;PTPN14;EFNB2	positive regulation of cellular component biogenesis	13	0.0152815	CAV1;PALM;ESR1;PIP4K2C;GTF2H1;LIMS1;BID;FER;NTRK3;PPM1F;JMY;DDB1;CNOT6L
regulation of protein acetylation	4	0.00807417	MYOCD;RPS6KA5;SMAD4;GSK3B	coronary vasculature morphogenesis	1	0.0388249	TGFBR1	secretory granule membrane	23	0.00385279	SURF4;CD55;RPH3AL;CAV1;VAMP2;VAMP1;NFAM1;CYBB;SIGLEC14;PHACTR2;RAB7A;RAB5C;RAB5B;PKP1;RAP1A;MAGT1;NFASC;RAB10;TSPAN14;MLEC;CD68;VAMP8;TMED10	nuclear transport	6	0.0330861	TNPO1;PIK3R2;SRSF7;TXNIP;PTPN14;RBM8A	tumor necrosis factor secretion	3	0.0188355	HMGB1;MAVS;LILRA2	response to wounding	15	0.0154833	P2RX3;HMGB1;CAV1;CDKN1A;MYL12A;SYT7;ETS1;CD151;NTRK3;RREB1;CBX5;COL1A1;ZFP36L2;EPHA4;SOX2
methylated histone binding	4	0.00807417	PHF19;CBX2;GLYR1;CBX5	peptidyl-lysine dimethylation	1	0.0388249	SUV39H1	positive regulation of glucose import	6	0.00389493	MAPK14;ARPP19;RAP1A;OSBPL8;AKT2;PIK3R1	apolipoprotein A-I-mediated signaling pathway	1	0.0331272	RHOA	erythrocyte homeostasis	7	0.018848	ARNT;BCL6;ETS1;GPI;GATA2;KLF13;ACVR1B	phosphatase inhibitor activity	3	0.0155183	MGAT5;PPP1R1A;ARPP19
methylation-dependent protein binding	4	0.00807417	PHF19;CBX2;GLYR1;CBX5	clathrin coat of endocytic vesicle	1	0.0388249	AP2M1	intracellular transport	100	0.00392767	SURF4;KCNIP3;PABPN1;RPL28;CD55;KPNA6;DCTN4;RAB21;CACNG8;RPH3AL;VAMP2;VAMP1;ACTR1A;SYVN1;MAPK14;UHMK1;GOSR2;ERC1;PHAX;CLUAP1;PITPNM3;STX2;NUP43;ACAP2;WDR33;CASC3;PML;SUFU;BLOC1S3;YWHAZ;AGK;CHCHD4;PPP1R12A;DDX19B;VPS37B;SRSF10;HPS4;RAB7A;RPH3A;CALR;NTN1;RAB11B;RAB5C;FGF9;RAB5B;MDM2;RPS24;DVL1;RAP1A;YOD1;SAR1B;WWC1;HEATR5A;TARDBP;PRRT2;RSRC1;AP2M1;GDI1;UBE2G2;PEX26;MAPK1;RAB15;ANK1;RAB10;CREB3L2;ATL…	response to iron(II) ion	1	0.0331272	IREB2	cofactor binding	19	0.0189933	FXN;LIAS;CYP27C1;H6PD;DBT;GSTM3;DHTKD1;CYCS;CISD2;PANK3;NQO2;PTGS1;PTGES2;IDH3A;MICAL2;CYP20A1;ACOX1;SGPL1;CYB5R3	positive regulation of angiogenesis	6	0.0155212	HMGB1;AGO2;MTDH;ETS1;HMGA2;BTG1
neuron development	21	0.0080913	MYLIP;OPHN1;HMGB1;MFSD8;BCL2;ANKS1A;RPS6KA5;SMAD4;NPTXR;SEMA4G;ITGA3;GDI1;BTG2;NFASC;STK11;CABP4;EFNA5;SDC4;SRCIN1;CBX6;GSK3B	MAP kinase kinase activity	1	0.0388249	MAP3K9	lymphangiogenesis	4	0.00399879	CCBE1;PROX1;BMPR2;VASH1	positive regulation of long-term synaptic depression	1	0.0331272	KCNB1	endocardial cushion development	4	0.0192441	BMPR2;BMP7;HEYL;TGFBR1	post-translational protein modification	10	0.0155869	KBTBD6;FN3K;DDA1;ICMT;PSMB5;FSTL3;VCAN;DCAF16;DDB1;CHML
regulation of mononuclear cell proliferation	7	0.00814179	HMGB1;BCL2;IL6R;SYK;SDC4;SPN;IL2RA	cytoskeleton organization	7	0.0390483	ACTB;ILK;TAOK1;TGFBR1;GEN1;PPM1F;JMY	RNA interference	4	0.00399879	AGO2;CELF1;XPO5;DROSHA	regulation of blood vessel diameter by renin-angiotensin	1	0.0331272	RHOA	positive regulation of mRNA catabolic process	4	0.0192441	PNPT1;BTG2;ZC3H12D;TNRC6B	protein phosphorylation	34	0.0157234	CAB39;HMGB1;CAV1;CTDSPL;CDKN1A;TLR7;IRAK4;SH3BP5;TAOK1;STK4;PRPF4B;WNT9B;AR;CD3E;TMEM189-UBE2V1;MINK1;RSRC1;MAPK13;GTF2H1;FER;NTRK3;HMGA2;IL6R;PPM1F;ZFP36L2;DAZAP2;EPHA4;FRS2;GRK3;PRKAA1;TRAF3IP1;SOX2;IGF1R;CDK2AP1
regulation of binding	10	0.00817938	HMGB1;CAV1;MET;BCL2;MYOCD;LEF1;SMAD4;SMAD2;LDOC1;GSK3B	cytokine binding	2	0.0393153	CD109;TGFBR1	integral component of peroxisomal membrane	4	0.00399879	PEX11B;PEX26;PEX2;PEX16	renal control of peripheral vascular resistance involved in regulation of systemic arterial blood pressure	1	0.0331272	RHOA	integral component of endoplasmic reticulum membrane	8	0.0192675	G6PC;SLC35B4;ELOVL5;EMC8;TEX261;SCD;SGPL1;SAMD8	myelination	5	0.0158999	ADAM22;NCMAP;SKI;PIKFYVE;NTRK3
regulation of cell-matrix adhesion	5	0.00831905	BCL2;CDK6;EFNA5;SDC4;GSK3B	peptidyl-serine modification	3	0.0394018	ILK;TGFBR1;PPM1F	intrinsic component of peroxisomal membrane	4	0.00399879	PEX11B;PEX26;PEX2;PEX16	ADP biosynthetic process	1	0.0331272	AK2	regulation of lymphocyte proliferation	10	0.0193558	HMGB1;IKZF3;TIRAP;NFATC2;IL6R;CD1D;TMIGD2;BTK;BCL6;GPR183	cellular protein-containing complex assembly	22	0.0159636	MYBPC1;HMGB1;COX19;DNAL1;ESR1;AGO3;CD3E;DDX6;SNU13;AGO2;ATPAF1;CPSF7;GTF2H1;FER;COX10;INSIG1;JMY;DDB1;PRKAA1;FCHO2;CNOT6L;RPF2
phosphatidylinositol phosphorylation	5	0.00831905	IRS1;MET;PIK3R2;SMG1;PIP4K2B	Fostamatinib	3	0.0394018	TAOK1;TGFBR1;MAP3K9	MAP kinase kinase activity	4	0.00399879	MAP3K9;MAPK14;PAK3;MAPK1	regulation of vacuolar transport	1	0.0331272	ARF1	regulation of cellular ketone metabolic process	7	0.0196466	IRS1;PDK1;PANK2;LONP2;PDP2;PLIN5;ELOVL5	somatodendritic compartment	18	0.0161743	OPHN1;SLC38A2;P2RX3;SAMD4A;SHISA9;PALM;PLCB4;CD3E;MINK1;AGO2;TMEM50A;SYT7;MYO10;GLUL;KCNB1;RBM8A;EPHA4;PRKAA1
epithelial cell development	7	0.00835104	FNDC3A;HNF4A;MET;CDK6;RFX3;PPP1R12A;GSK3B	cellular chemical homeostasis	5	0.0397336	ORMDL3;UBTF;MEN1;TBXA2R;TRPC3	Methionine	4	0.00399879	MAT2A;MAT1A;MTHFR;MSRB1	regulation of modification of postsynaptic actin cytoskeleton	1	0.0331272	RHOA	cellular polysaccharide biosynthetic process	5	0.0196719	IRS1;B3GNT2;GSK3B;PPP1R3B;PGM2L1	Necroptosis	6	0.0164054	HIST1H2AG;HMGB1;BID;PPIA;GLUL;IFNAR2
mesenchymal cell differentiation	7	0.00835104	BCL2;LEF1;SMAD4;SEMA4G;SMAD2;HEYL;GSK3B	negative regulation of cell communication	7	0.0397442	CASTOR2;PHLDA3;MEN1;CD109;TGFBR1;STAM;RBMS3	signal transduction in response to DNA damage	13	0.00404854	CDKN1A;MAPK14;PML;GRB2;CDKN1B;MDM4;BTG2;CNOT6L;SESN2;MDM2;SPRED1;TFDP2;TP53	regulation of sodium-dependent phosphate transport	1	0.0331272	CRY2	regulation of chromosome organization	14	0.0198256	MYB;CDK9;KDM5A;SMG1;CTCFL;TERF1;BCL6;NAA40;GATA2;RIF1;GEN1;HMBOX1;MAPK1;SETD7	ATP	3	0.0165312	ABCC9;GRK3;PRKAA1
regulation of gene expression, epigenetic	8	0.00840157	HMGB1;FXR1;MYCN;PHF19;TNRC6B;SMAD2;POLR2E;TNRC6A	regulation of wound healing	2	0.0398777	TBXA2R;CD109	cellular response to growth factor stimulus	43	0.00411074	CDH5;RNF165;CAV1;GLG1;DSTYK;DKK3;MAPK14;CCBE1;CREB1;MYOCD;VEGFA;ACAP2;ERRFI1;PML;GRB2;NDST1;LEF1;SMAD4;PAX2;FKBP8;PLCG1;CRB2;FGF9;MDM2;XIAP;MAPKAPK2;SPRED1;RAP1A;ITGA3;EEF2K;LIMS1;TIAL1;SYAP1;MAPK1;HEYL;STK11;GTF2F1;ACVR2A;FSTL3;TGFBR1;POLR2E;BMPR2;EHD1	voluntary skeletal muscle contraction	1	0.0331272	SYNM	immune system development	30	0.0198487	MYB;HMGB1;IKZF3;TIRAP;NFATC2;ARNT;POU2F2;CD1D;DHTKD1;F2RL1;BCL2L11;BTK;BCL6;ETS1;ONECUT1;CD109;ADD2;ATXN1L;GATA2;TGFBR1;RIF1;KLF13;STK4;TYRO3;ACVR1B;GPR183;TNRC6B;MAPK1;KLF6;SGPL1	negative regulation of lipid metabolic process	4	0.0165819	REST;SNAI2;INSIG1;PRKAA1
Adherens junction	4	0.00847627	MET;LEF1;SMAD4;SMAD2	cellular response to glucose stimulus	2	0.0398777	UBTF;MEN1	intrinsic component of organelle membrane	19	0.00414759	P2RX3;SLC35B1;VAMP1;A4GALT;AGK;SLC6A17;PEX11B;RAB11B;RAB5B;ECE1;PEX26;PEX2;VOPP1;QSOX1;BET1L;STX6;BAK1;PEX16;ACER3	twitch skeletal muscle contraction	1	0.0331272	SYNM	regulation of mononuclear cell proliferation	10	0.0199501	HMGB1;IKZF3;TIRAP;NFATC2;IL6R;CD1D;TMIGD2;BTK;BCL6;GPR183	cellular response to prostaglandin E stimulus	2	0.0166745	ACACA;PRKAA1
response to decreased oxygen levels	9	0.00853454	CAV1;BCL2;MYOCD;REST;SMAD4;MDM4;LDHA;STC2;MTHFR	regulation of smooth muscle cell proliferation	2	0.0398777	MYB;ILK	positive regulation of cell projection organization	27	0.00417203	ABL2;RAB21;PALM;FBXW8;PAK3;CRTC1;PTK6;VEGFA;WNT3;NTN1;CAPRIN1;SRF;DVL1;RAP1A;ITGA2;ITGA3;EEF2K;GDI1;CREB3L2;STK11;BCAS3;TGFBR1;BMPR2;SEMA5A;EFNA5;PLXNA3;PLXND1	interkinetic nuclear migration	1	0.0331272	HOOK3	pyridine nucleotide metabolic process	8	0.0199852	H6PD;ARNT;DHTKD1;GPI;PFKFB3;ENTPD5;PGM2L1;PFKFB2	response to caffeine	2	0.0166745	DNMT3B;PRKAA1
DNA integrity checkpoint	6	0.00854562	CNOT4;FOXN3;MDM4;BTG2;CNOT6L;PEA15	protein modification by small protein conjugation or removal	6	0.0398945	USP15;ACTB;UBE2Z;UBE2N;TGFBR1;STAM	positive regulation of intracellular signal transduction	63	0.00417531	EPHB1;MAP3K9;IL5;HACD3;P2RX3;HMGB1;CAV1;GJA1;ESR1;DSTYK;F2RL3;MAPK14;PAK3;GPR37L1;PTK6;IL6R;VEGFA;GRB2;NDST1;KLHDC10;PLAGL2;DDR1;IGFBP4;NRG4;DUSP9;CALR;GNG3;SH3RF1;CCL11;PRLR;RASGRF1;FGF9;NPR1;MAPKAPK2;UNC5B;DHX33;SPRED1;RAP1A;OSBPL8;WWC1;MYORG;DIRAS2;PTPN2;CCL22;LIMS1;MAPK1;UBE2N;MAP4K2;MAPK8IP3;TNFSF14;TP53;S1PR2;SYK;TGFBR1;PIK3R1;HPSE;RRAGD;GPR55;IL23R;SEMA5A;SAMD5;REL;TAOK1	response to camptothecin	1	0.0331272	PRKAA1	nicotinamide nucleotide metabolic process	8	0.0199852	H6PD;ARNT;DHTKD1;GPI;PFKFB3;ENTPD5;PGM2L1;PFKFB2	response to diuretic	2	0.0166745	DNMT3B;PRKAA1
regulation of activated T cell proliferation	3	0.00858479	HMGB1;IL6R;IL2RA	positive regulation of cellular component biogenesis	4	0.040189	TGFBR1;PPM1F;JMY;STAM	regulation of apoptotic process	86	0.00417678	EPHB1;NONO;CCND2;CSNK2A1;MAP3K9;CCR5;RNF144B;HMGB1;SOD2;CAV1;CDKN1A;STAMBP;PPP2R1B;ESR1;DSTYK;SYVN1;ERC1;PAK3;TPT1;CREB1;MYOCD;VEGFA;PML;YWHAZ;REST;CDKN1B;LEF1;VAV3;MDM4;LDHA;RPS6KA3;PLAGL2;PTPA;DDR1;RARA;RTKN;PAX2;BTG2;CALR;FKBP8;CFL1;SH3RF1;PRLR;PLCG1;BBC3;MDM2;XIAP;UNC5B;ZNF268;MNT;STK4;PTPN2;PSME3;TARDBP;EEF2K;TFDP2;GRINA;YME1L1;SERBP1;FOSL1;CAMK2A;TNFSF14;IKZF3;XRCC2;NTSR1;UFM1;AKT2;PLAC8;TP…	synapse pruning	1	0.0331272	EPHA4	NIK/NF-kappaB signaling	7	0.0204686	HMGB1;TSPAN6;TIRAP;BMP7;LIMS1;SAMD5;REL	negative regulation of TORC1 signaling	2	0.0166745	CASTOR2;SESN3
palmitoyltransferase activity	3	0.00858479	SPTLC2;ZDHHC16;ZDHHC22	negative regulation of signaling	7	0.0403067	CASTOR2;PHLDA3;MEN1;CD109;TGFBR1;STAM;RBMS3	signal transduction involved in cell cycle checkpoint	9	0.00419462	CDKN1A;PML;CDKN1B;MDM4;BTG2;CNOT6L;MDM2;TFDP2;TP53	tooth eruption	1	0.0331272	COL1A1	AMPK signaling pathway	7	0.0204686	IRS1;G6PC;EEF2K;PFKFB3;CAB39;SCD;PFKFB2	regulation of fibroblast apoptotic process	2	0.0166745	BID;BTG1
regulation of nucleocytoplasmic transport	5	0.00862753	PPP1R12A;PIK3R2;PTPN14;XPO4;GSK3B	response to light stimulus	3	0.0403746	MEN1;TRPC3;GEN1	Endocytosis	20	0.00420578	CCR5;CAV1;STAMBP;ACAP2;PML;VPS37B;RAB7A;IQSEC2;RAB11B;RAB5C;RAB5B;MDM2;AP2M1;IL2RA;RAB10;RAB11FIP4;TGFBR1;WIPF3;RAB11FIP1;EHD1	response to fluoride	1	0.0331272	COL1A1	mesenchymal cell differentiation	10	0.0205576	FAM83D;BMP7;LIMS1;SEMA3E;SEMA5A;FGFR1;HEYL;GSK3B;TGFBR1;MAPK1	nephric duct development	2	0.0166745	WNT9B;EPHA4
cellular response to DNA damage stimulus	17	0.00875025	HMGB1;CNOT4;BCL2;FOXN3;MOAP1;ZDHHC16;MDM4;GTF2H5;MAPKAPK2;BTG2;STK11;CBX5;POLR2E;CNOT6L;SMG1;PEA15;USP7	cellular response to hexose stimulus	2	0.0410117	UBTF;MEN1	myeloid leukocyte mediated immunity	37	0.00424351	SURF4;CD55;HMGB1;VAMP2;NFAM1;MAPK14;CYBB;PPIA;SIGLEC14;PTGES2;PDXK;RAB7A;RAB5C;RAB5B;PKP1;GM2A;RAP1A;ADA2;MAGT1;FLG2;MAPK1;NFASC;RAB10;COMMD9;TSPAN14;PLAC8;SYK;QSOX1;HPSE;PGAM1;CD84;MLEC;METTL7A;CD68;CAB39;VAMP8;PAFAH1B2	adiponectin-activated signaling pathway	1	0.0331272	ADIPOR2	receptor complex	16	0.0206567	IRS1;BMPR2;IL10RB;PEX5L;IL6R;GRIN2B;FGFR1;SHISA9;LDLR;CACNG7;GPR63;GPRC5A;TGFBR1;TYRO3;ACVR1B;NPNT	regulation of tolerance induction	2	0.0166745	HMGB1;CD3E
ossification	10	0.00878914	BCL2;CDK6;IL6R;REST;LEF1;TOB2;ZHX3;SATB2;SYNCRIP;TP53INP2	smooth muscle cell proliferation	2	0.0410117	MYB;ILK	GDP binding	8	0.00427551	RAB21;RAB7A;RAB11B;RAB5C;RAB5B;RAB10;RRAGD;MIEF1	positive regulation of protein localization to cell cortex	1	0.0331272	GNAI1	positive regulation of nucleotide metabolic process	4	0.020707	ARNT;PFKFB3;ENTPD5;PFKFB2	heterochromatin organization	2	0.0166745	MTHFR;HMGA2
regulation of phosphorylation	27	0.00880636	IRS1;HMGB1;CAV1;MET;BCL2;IL6R;GMFB;MYOCD;ERRFI1;RPS6KA5;CCNE2;SMAD4;AKAP13;ZBTB20;IGFBP4;GNG3;MAPKAPK2;DIRAS2;CCL22;PIK3R2;MAP4K2;STK11;SYK;EFNA5;SDC4;SRCIN1;PEA15	histone H3-K9 trimethylation	1	0.0412018	SUV39H1	vesicle organization	24	0.00429903	CAV1;VAMP1;F2RL3;GOSR2;STX2;CREB1;BLOC1S3;VAV3;VPS37B;HPS4;RAB7A;SDC4;CALR;RAB5B;SAR1B;PRRT2;AP2M1;SAR1A;AKT2;STX1B;STX16;STX6;VPS41;TMED10	mast cell differentiation	1	0.0331272	TAL1	positive regulation of purine nucleotide metabolic process	4	0.020707	ARNT;PFKFB3;ENTPD5;PFKFB2	RNA interference	2	0.0166745	AGO3;AGO2
chemotaxis	14	0.00881595	OPHN1;HMGB1;MET;IL6R;RPS6KA5;LEF1;SMAD4;SEMA4G;CCR5;CCL22;NFASC;SYK;EFNA5;SPN	peptidyl-serine dephosphorylation	1	0.0412018	PPM1F	negative regulation of cell growth	16	0.00435645	ULK2;CDKN1A;GJA1;PML;CDKN1B;SMAD4;WNT3;SESN2;NTN1;EI24;NPR1;STK11;TP53;BMPR2;SEMA5A;PLXNA3	regulation of protein tyrosine phosphatase activity	1	0.0331272	MGAT5	glycogen biosynthetic process	4	0.020707	IRS1;GSK3B;PPP1R3B;PGM2L1	Methionine	2	0.0166745	MTHFR;GLUL
SMAD protein complex assembly	2	0.008853	SMAD4;SMAD2	platelet alpha granule membrane	1	0.0412018	CD109	cardiac myofibril assembly	5	0.00439084	MYBPC1;SMAD4;PROX1;SRF;MYLK3	response to hypobaric hypoxia	1	0.0331272	IREB2	glucan biosynthetic process	4	0.020707	IRS1;GSK3B;PPP1R3B;PGM2L1	protein kinase activity	15	0.0169099	CAB39;CDKN1A;IRAK4;TAOK1;STK4;PRPF4B;MINK1;MAPK13;GTF2H1;FER;NTRK3;EPHA4;GRK3;PRKAA1;IGF1R
maintenance of cell polarity	2	0.008853	ANK1;GSK3B	Seh1-associated complex	1	0.0412018	CASTOR2	positive regulation of DNA-templated transcription, initiation	5	0.00439084	ESR1;CREB1;SRF;FOSL1;TP53	regulation of motor neuron apoptotic process	1	0.0331272	KCNB1	cortical cytoskeleton organization	4	0.020707	WIPF3;WIPF2;EPB41L1;FMNL2	macromolecule catabolic process	26	0.0169681	OPHN1;RNF165;RNF144B;HMGB1;SF3B3;SAMD4A;CAV1;AREL1;YOD1;AGO3;UBE2Z;DDX6;AGO2;SERBP1;PRELP;DDA1;PSMB5;VCAN;SDC3;RNF111;TRPC4AP;RBM8A;ZFP36L2;DDB1;EPHA4;CNOT6L
cellular response to interleukin-2	2	0.008853	SYK;IL2RA	transmembrane receptor protein serine/threonine kinase activity	1	0.0412018	TGFBR1	fibronectin binding	5	0.00439084	PLEKHA2;VEGFA;SDC4;ITGA3;FSTL3	positive regulation of amyloid-beta clearance	1	0.0331272	LRPAP1	anatomical structure formation involved in morphogenesis	35	0.0207108	HMGB1;LIAS;BMPR2;PIKFYVE;HES2;XRCC2;SOX7;MYLK3;NKD1;NFATC2;BMP7;PTPN14;SEMA3E;ADM2;SEMA5A;FGFR1;HPSE;HEYL;KDM2B;TMIGD2;BCL2L11;EFNB2;BCL6;ETS1;GPI;CD109;FKBP1A;GATA2;TGFBR1;NFASC;STK4;SOCS7;NFIB;MAPK1;CLIC4	ensheathment of neurons	5	0.016991	ADAM22;NCMAP;SKI;PIKFYVE;NTRK3
dendritic spine membrane	2	0.008853	PALM;SHISA9	5'-3' exonuclease activity	1	0.0412018	GEN1	developmental process involved in reproduction	43	0.00445248	DDX6;ESR1;PAQR7;FBXW8;MAPK14;STC1;SMARCC1;MYOCD;VEGFA;CELF4;PGR;GRB2;CDKN1B;LEF1;SMAD4;RARA;CBX2;FGF9;BASP1;STK4;CELF1;FANCC;SENP2;WNT9B;TIAL1;LDOC1;FAM9B;MAPK1;FOSL1;STK11;ACVR2A;FSTL3;TGFBR1;FEM1B;ABHD2;ZBTB16;FANCA;BMPR2;VASH1;BAK1;MCMDC2;MC2R;ADAM19	negative regulation of tubulin deacetylation	1	0.0331272	PRKAA1	coenzyme A biosynthetic process	2	0.0208166	PANK2;PANK3	chemokine production	4	0.0172995	HMGB1;TLR7;SNAI2;IL6R
signal transduction involved in DNA integrity checkpoint	4	0.00889125	CNOT4;MDM4;BTG2;CNOT6L	negative regulation of phosphate metabolic process	4	0.0418613	MEN1;ILK;CD109;PPM1F	regulation of developmental growth	24	0.00447272	ULK2;RAB21;CDKN1A;MAPK14;CREB1;VEGFA;CDKN1B;DPYSL2;WNT3;NTN1;PROX1;FGF9;BASP1;SRF;WWC1;STK4;GDI1;PLAC8;TGFBR1;BMPR2;SEMA5A;EFNA5;PLXNA3;GPAT4	mRNA cleavage involved in gene silencing by miRNA	1	0.0331272	AGO1	regulation of deoxyribonuclease activity	2	0.0208166	HMGB1;DFFA	RNA degradation	4	0.0172995	DDX6;BTG1;CNOT6L;TOB2
signal transduction involved in DNA damage checkpoint	4	0.00889125	CNOT4;MDM4;BTG2;CNOT6L	negative regulation of phosphorus metabolic process	4	0.0421034	MEN1;ILK;CD109;PPM1F	Thyroid cancer	6	0.00448384	CDKN1A;LEF1;TPM3;MAPK1;TP53;BAK1	mRNA cleavage involved in gene silencing	1	0.0331272	AGO1	positive regulation of fatty acid beta-oxidation	2	0.0208166	IRS1;PLIN5	NIK/NF-kappaB signaling	5	0.0175547	HMGB1;TLR7;AGO3;LIMS1;REL
protein transport	33	0.00891207	IRS1;HMGB1;PPIA;HNF4A;PPP1R11;COPZ1;RFX3;REST;KPNA6;AGK;VPS37B;SYT7;SRP14;ZDHHC22;RPH3A;RAB11B;RAB5B;SMAD2;PTPRN2;GDI1;PIK3R2;RABGAP1L;SYK;MIEF1;EFNA5;PTPN14;STX6;SMG1;SRCIN1;TCAF1;RBM8A;XPO4;GSK3B	fibrillar center	2	0.0427355	UBTF;UBE2N	regulation of axonogenesis	16	0.00459771	ULK2;RAB21;PAK3;VEGFA;UST;DPYSL2;WNT3;NTN1;SRF;GDI1;STK11;BMPR2;SEMA5A;EFNA5;PLXNA3;PLXND1	protein retention in Golgi apparatus	1	0.0331272	VPS13D	positive regulation of endoplasmic reticulum stress-induced intrinsic apoptotic signaling pathway	2	0.0208166	BCL2L11;PMAIP1	JNK cascade	7	0.0175804	HMGB1;IRAK4;TAOK1;TMEM189-UBE2V1;MINK1;EPHA4;IGF1R
taxis	14	0.00905566	OPHN1;HMGB1;MET;IL6R;RPS6KA5;LEF1;SMAD4;SEMA4G;CCR5;CCL22;NFASC;SYK;EFNA5;SPN	regulation of exosomal secretion	1	0.0435731	STAM	positive regulation of cellular biosynthetic process	105	0.00471524	SPIB;KPNA6;CREBRF;IL5;PHF19;YTHDF1;HMGB1;SAMD4A;MICAL2;ESR1;GABPB1;MAPK14;UHMK1;PAK3;CYBB;MACC1;CRTC1;TRUB2;CREB1;SMARCC1;ARPP19;RFX3;MYOCD;VEGFA;E2F5;PGR;PML;DYRK2;REST;PTGES2;FXR1;RPS6KA5;PPP1R12A;LEF1;SMAD4;SSBP2;MYCN;RPS6KA3;PLAGL2;KLF13;RARA;ATXN7L3;PAX2;AGO2;SOAT1;NEK4;SESN2;NRF1;PROX1;RORA;S1PR1;MAPKAPK2;DHX33;SRF;DVL1;ZNF268;MNT;ITGA2;WWC1;SENP2;PTPN2;KAT7;TARDBP;ELK1;TFDP2;MAFF;PKNOX1;MA…	autophagy of host cells involved in interaction with symbiont	1	0.0331272	ULK1	regulation of toll-like receptor 3 signaling pathway	2	0.0208166	TIRAP;F2RL1	dendritic spine	6	0.0177958	OPHN1;P2RX3;SHISA9;PALM;CD3E;EPHA4
mesenchyme development	8	0.00917034	BCL2;LEF1;SMAD4;SEMA4G;BASP1;SMAD2;HEYL;GSK3B	NuA4 histone acetyltransferase complex	1	0.0435731	ACTB	cytoplasmic side of plasma membrane	14	0.00477417	RAB21;PALM;ATP2B1;PTK6;ERRFI1;ESYT2;GNG3;GM2A;RACGAP1;SYAP1;ANK1;NTSR1;NPTXR;SNX9	autophagy involved in symbiotic interaction	1	0.0331272	ULK1	regulation of cellular carbohydrate catabolic process	2	0.0208166	HMGB1;PPP1R3B	positive regulation of interleukin-6 production	4	0.0180363	HMGB1;TLR7;MAPK13;IL6R
virion assembly	3	0.00922517	PPIA;VPS37B;DDX6	H4/H2A histone acetyltransferase complex	1	0.0435731	ACTB	nucleolus	57	0.00486318	NONO;DDX6;CCND2;SF3B3;SAMD4A;CDKN1A;CBX5;PDK3;GNL3L;E2F5;WDR33;PML;GRB2;TSEN2;FXR1;CRIPT;MYCN;SLC29A2;PAX2;GTPBP10;SMC2;MDM2;RRP7A;DHX33;MRI1;KRI1;NFX1;STK35;OLA1;ZC3H15;POLD4;ZNF106;KAT7;GRWD1;LDOC1;MEAF6;UBE2N;ZNF655;IMP4;BCAS3;TP53;RPL7L1;ACACA;CCNT1;POLR2E;NFIC;ACOX1;NOM1;SMUG1;TBCA;KDM2B;LIN28B;SPATA2;BUD23;GTF2H5;DROSHA;PAFAH1B2	autophagy of nucleus	1	0.0331272	ATG13	type I interferon secretion	2	0.0208166	HMGB1;MAVS	positive regulation of cell cycle arrest	4	0.0180363	CDKN1A;HMGA2;CASP2;CNOT6L
regulation of protein export from nucleus	3	0.00922517	PTPN14;XPO4;GSK3B	regulation of epithelial cell proliferation	3	0.0437053	MEN1;CD109;TGFBR1	regulation of hydrolase activity	72	0.00500102	CSNK2A1;ABL2;SERPINA4;RASGEF1B;HACD3;PPP1R1A;HMGB1;CAV1;PPP2R1B;ESR1;MAPK14;ARPP19;VEGFA;ACAP2;ERRFI1;PML;REST;PHACTR2;PPP1R12A;LEF1;VAV3;RPS6KA3;PTPA;RTKN;PAX2;PGAM5;RGS6;SH3RF1;ARHGAP31;CCL11;PPP1R11;GRIN2B;PLCG1;CRB2;RASGRF1;S1PR1;BBC3;MDM2;XIAP;GM2A;SPRED1;RAP1A;ITGA2;PPP1R14C;CST9;PSME3;CCL22;LIMS1;RACGAP1;GDI1;EFNA3;TNFSF14;PSMF1;GAPVD1;BCAS3;AKT2;TOR1AIP1;TP53;RABGAP1L;GPR55;USP14;SOX7;A2M…	nuclear migration along microtubule	1	0.0331272	TRIM58	positive regulation of protein homodimerization activity	2	0.0208166	TIRAP;SYAP1	SMAD binding	4	0.0180363	SKI;SKIL;RNF111;HMGA2
phosphotyrosine residue binding	3	0.00922517	IRS1;PIK3R2;SYK	adenylate cyclase-activating G protein-coupled receptor signaling pathway	2	0.0438997	TBXA2R;GPR26	regulation of intracellular protein transport	19	0.00500348	VAMP2;MAPK14;UHMK1;SUFU;HPS4;MDM2;YOD1;SAR1B;TARDBP;GDI1;UBE2G2;MAPK1;SAR1A;BCAS3;AKT2;TP53;PIK3R1;MIEF1;XPO5	presynaptic endocytic zone membrane	1	0.0331272	FCHO2	Renal cell carcinoma	5	0.0208235	ARNT;CRK;VHL;ETS1;MAPK1	gland morphogenesis	5	0.0181307	CAV1;ESR1;AR;SNAI2;FRS2
peptidase activator activity	3	0.00922517	CAV1;PSME3;BCL2L13	male gonad development	2	0.0438997	TGFBR1;ARID5B	positive regulation of cellular protein localization	24	0.00502934	VAMP2;MAPK14;GNL3L;YWHAZ;HPS4;SESN2;CENPQ;BBC3;MDM2;SAR1B;KAT7;ITGA3;TARDBP;GPSM2;TFDP2;MAPK1;SAR1A;STK11;BCAS3;AKT2;TP53;PIK3R1;MIEF1;WNK3	Cul4B-RING E3 ubiquitin ligase complex	1	0.0331272	DDB1	regulation of chromatin organization	9	0.020919	MYB;CDK9;KDM5A;CTCFL;BCL6;NAA40;GATA2;RIF1;SETD7	axon terminus	5	0.0181307	OPHN1;P2RX3;SYT7;GLUL;EPHA4
protein phosphatase inhibitor activity	3	0.00922517	PPP1R1A;PPP1R11;ARPP19	cell activation	7	0.0440931	MYB;ACTB;ORMDL3;ILK;TRPC3;TGFBR1;CYB5R3	filopodium membrane	4	0.00505436	PALM;UTRN;ITGA3;ANTXR1	omegasome	1	0.0331272	ULK1	pharyngeal system development	3	0.0209387	BMPR2;BMP7;TGFBR1	response to hormone	20	0.0183374	ACACA;HMGB1;CAV1;CDKN1A;REST;ESR1;NR2C2;AR;DNMT3B;ETS1;SESN3;FER;NTRK3;SOCS7;PADI2;BTG1;COL1A1;ZFP36L2;PRKAA1;IGF1R
negative regulation of leukocyte cell-cell adhesion	5	0.00926807	HMGB1;PAG1;SDC4;SPN;IL2RA	whole membrane	8	0.0444271	RAB15;ORMDL3;AP2M1;CD109;TGFBR1;OCA2;STAM;CYB5R3	morphogenesis of a branching epithelium	16	0.00511299	ESR1;VEGFA;PGR;PML;GRB2;LEF1;SMAD4;DDR1;PAX2;CCL11;PROX1;SRF;STK4;WNT9B;FEM1B;PLXND1	FHF complex	1	0.0331272	HOOK3	endocardial cushion formation	3	0.0209387	BMP7;HEYL;TGFBR1	cellular response to amino acid starvation	3	0.018666	SLC38A2;CDKN1A;SESN3
signal transduction involved in cell cycle checkpoint	4	0.00931929	CNOT4;MDM4;BTG2;CNOT6L	development of primary male sexual characteristics	2	0.0444862	TGFBR1;ARID5B	positive regulation of cell-matrix adhesion	7	0.00511697	PLEKHA2;UTRN;VEGFA;CDK6;SDC4;FMN1;LIMS1	BH3 domain binding	1	0.0331272	MCL1	Flavin adenine dinucleotide	3	0.0209387	NQO2;ACOX1;CYB5R3	positive regulation of mRNA catabolic process	3	0.018666	AGO2;ZFP36L2;CNOT6L
skeletal muscle tissue development	6	0.00932738	CAV1;BCL2;MYOCD;MYH14;BTG2;HEYL	macromolecule catabolic process	7	0.0445446	USP15;UBE2Z;AP2M1;PRELP;UBE2N;DDA1;GEN1	heart development	36	0.00516104	MYBPC1;MICAL2;CDKN1A;GJA1;MAPK14;CREB1;MYOCD;VEGFA;SUFU;REST;NDST1;NSD2;CDKN1B;SMAD4;RARA;CALR;PROX1;S1PR1;FGF9;MDM2;BASP1;PARVA;SRF;SPRED1;STK4;SENP2;ITGA3;ECE1;TFDP2;MAPK1;HEYL;MTHFD1;TGFBR1;BMPR2;MYLK3;PLXND1	interferon receptor activity	1	0.0331272	IFNAR2	positive regulation of immune response	25	0.0210311	MYB;HMGB1;RPS6KA3;MAVS;TSPAN6;TIRAP;NFATC2;PVR;CRK;IL6R;CD1D;IRAK4;F2RL1;CFHR5;WIPF3;WIPF2;BTK;LIMK1;IKBKG;C1RL;GATA2;RIF1;LILRA2;TYRO3;MAPK1	positive regulation of extrinsic apoptotic signaling pathway via death domain receptors	2	0.0187436	STK4;SKIL
lymphocyte proliferation	8	0.00957387	HMGB1;BCL2;IL6R;LEF1;SYK;SDC4;SPN;IL2RA	Ubiquitin mediated proteolysis	2	0.0450757	UBE2Z;UBE2N	positive regulation of cyclin-dependent protein kinase activity	5	0.00520225	CCND2;CDKN1A;CDKN1B;PROX1;CCNT1	phosphatidylinositol-3,5-bisphosphate 5-phosphatase activity	1	0.0331272	PIKFYVE	regulation of translation	14	0.021241	RPS6KA3;RBM4B;PIWIL1;RBM8A;BTG2;CELF1;TRMT10C;DNAJC24;ZC3H12D;QKI;TNRC6B;MAPK1;RMND1;UHMK1	negative regulation of anoikis	2	0.0187436	CAV1;SNAI2
negative regulation of cell development	9	0.00959156	MYLIP;BCL2;REST;SMAD4;SEMA4G;DDX6;GDI1;EFNA5;GSK3B	negative regulation of molecular function	6	0.0453974	ACTB;UBE2Z;MEN1;ILK;CD109;PPM1F	Biosynthesis of unsaturated fatty acids	5	0.00520225	HACD3;HACD4;HACD2;ACOX1;FADS1	calmodulin-dependent protein phosphatase activity	1	0.0331272	PPM1F	cellular amide metabolic process	34	0.0214619	PDK1;RPS6KA3;PANK2;RBM4B;EEF2K;GSTM3;TARS2;PIWIL1;PDP2;MCTS1;THEM4;QRSL1;ACSL6;ELOVL5;GGT5;EEF1A1;RBM8A;HMGCS1;BTG2;CELF1;TRMT10C;COL4A3BP;SPCS3;DNAJC24;ZC3H12D;QKI;SCD;TNRC6B;MAPK1;RMND1;SGPL1;MRPS10;UHMK1;SAMD8	interleukin-6-mediated signaling pathway	2	0.0187436	FER;IL6R
positive regulation of intracellular transport	7	0.00969066	SYT7;PIK3R2;SYK;MIEF1;TCAF1;XPO4;GSK3B	positive regulation of JNK cascade	2	0.0456681	TAOK1;MAP3K9	Basal cell carcinoma	8	0.00521926	CDKN1A;SUFU;LEF1;WNT3;DVL1;WNT9B;TP53;BAK1	Triamcinolone	1	0.0331272	NR3C1	hindbrain development	8	0.0214774	NLGN4X;BMP7;CRK;KDM2B;EN2;GATA2;SOCS7;NFIB	filopodium membrane	2	0.0187436	PALM;MYO10
cell migration	25	0.00972051	OPHN1;HMGB1;SOD2;CAV1;PPIA;MET;BCL2;IL6R;ANKS1A;MYOCD;LAMC1;LEF1;SEMA4G;CCR5;SATB2;ITGA3;CCL22;PIK3R2;SYK;VASH1;EMX2;SDC4;SRCIN1;TCAF1;SPN	growth factor binding	2	0.0456681	CD109;TGFBR1	cellular response to lipid	39	0.00523811	PABPN1;ABL2;CD55;CCR5;CREBRF;HMGB1;ESR1;MAPK14;STC1;ATP2B1;PDK3;CREB1;PTK6;PGR;ERRFI1;REST;LEF1;RARA;WNT3;PAX2;CALR;RORA;ADCY6;ITGA2;FAM210B;WNT9B;ELK1;LDOC1;MAPK1;ADCY2;HEYL;TBXA2R;UFM1;PIAS2;ACACA;ABHD2;SSTR2;FFAR2;EFNA5	Phenformin	1	0.0331272	PRKAA1	response to transforming growth factor beta	11	0.0215622	USP15;BMPR2;LIMS1;CRK;ONECUT1;CD109;CBL;PEG10;TGFBR1;ACVR1B;NPNT	Seh1-associated complex	2	0.0187436	CASTOR2;SESN3
positive regulation of tumor necrosis factor production	4	0.00976053	HMGB1;ZBTB20;MAPKAPK2;SPN	positive regulation of protein metabolic process	8	0.0457984	MYB;UBE2N;ILK;TAOK1;TGFBR1;MAP3K9;PPM1F;RBMS3	protein kinase binding	41	0.00523995	CCND2;SH2B3;CAV1;CDKN1A;UTRN;ESR1;MAPK14;PITPNM3;ERRFI1;GRB2;SUFU;YWHAZ;OXSR1;CDKN1B;PPP1R12A;CCNE2;RPS6KA3;SDC4;RARA;PLCG1;NPR1;ADCY6;MAPKAPK2;PRKAB1;DVL1;SPRED1;PTPN2;LIMS1;RACGAP1;FAM83H;MAPK1;MAP4K2;MAPK8IP3;TP53;SYK;STX1B;CCNT1;PIK3R1;PRKAR2A;PGAM1;SAMD5	Podofilox	1	0.0331272	TUBB	lymphocyte mediated immunity	11	0.0215622	HMGB1;RAB27A;POU2F2;PVR;CRK;CD1D;BTK;BCL6;C1RL;RIF1;CLEC12B	DNA polymerase binding	2	0.0187436	HMGB1;CDK2AP1
Pancreatic cancer	4	0.00976053	CDK6;SMAD4;SMAD2;PIK3R2	cellular response to endogenous stimulus	7	0.0459172	USP15;ACTB;CASTOR2;MEN1;ILK;CD109;TGFBR1	DNA damage response, signal transduction by p53 class mediator	11	0.00525236	CDKN1A;PML;CDKN1B;MDM4;BTG2;CNOT6L;SESN2;MDM2;SPRED1;TFDP2;TP53	Ciclesonide	1	0.0331272	NR3C1	protein export from nucleus	9	0.0216058	SMG1;PTPN14;GSK3B;RBM8A;PABPN1;RAN;YTHDC1;UHMK1;NUP214	neuron spine	6	0.0187665	OPHN1;P2RX3;SHISA9;PALM;CD3E;EPHA4
nucleoplasm part	21	0.00976981	POGZ;REST;PHF19;ATXN7L3;GTF2H5;ZBTB20;RPRD2;GLYR1;BASP1;SATB2;DCAF7;MEAF6;CBX5;POLR2E;ZNF621;NUFIP2;TP53INP2;SPN;RBM8A;PNN;USP7	osteoblast development	1	0.0459386	MEN1	hypotonic response	3	0.00538979	OXSR1;ITGA2;CAB39	Batimastat	1	0.0331272	ADAM28	response to leukemia inhibitory factor	6	0.0218757	B3GNT2;GNPNAT1;UBXN2A;LRAT;ARID5B;RIF1	negative regulation of apoptotic process	19	0.0190141	RNF144B;SOD2;CAV1;CDKN1A;AREL1;UBE2Z;AR;GRINA;FXN;MTDH;SNAI2;BID;NTRK3;HMGA2;DDB1;EPHA4;CASP2;PRKAA1;IGF1R
regulation of protein secretion	11	0.00980041	IRS1;HMGB1;PPIA;HNF4A;PPP1R11;RFX3;REST;SYT7;SYK;EFNA5;SRCIN1	epithelial to mesenchymal transition involved in endocardial cushion formation	1	0.0459386	TGFBR1	skin morphogenesis	3	0.00538979	ERRFI1;SRF;ITGA2	SF1126	1	0.0331272	PIK3R2	cellular response to leukemia inhibitory factor	6	0.0218757	B3GNT2;GNPNAT1;UBXN2A;LRAT;ARID5B;RIF1	regulation of epithelial cell proliferation	9	0.0190615	HMGB1;CAV1;AR;SNAI2;LIMS1;GLUL;RREB1;FRS2;SOX2
lung alveolus development	3	0.00989274	ATXN1L;MYOCD;ERRFI1	myelin assembly	1	0.0459386	ILK	venous blood vessel morphogenesis	3	0.00538979	CCBE1;VEGFA;PROX1	regulation of axonogenesis	4	0.0332287	RHOA;SKIL;NTRK3;EPHA4	snRNA metabolic process	6	0.0218757	CDK9;POU2F2;PHAX;POU2F1;NABP1;RPRD2	epithelial cell proliferation	10	0.0191193	HMGB1;CAV1;ESR1;AR;SNAI2;LIMS1;GLUL;RREB1;FRS2;SOX2
regulation of leukocyte proliferation	7	0.00992835	HMGB1;BCL2;IL6R;SYK;SDC4;SPN;IL2RA	melanin biosynthetic process	1	0.0459386	OCA2	regulation of acyl-CoA biosynthetic process	3	0.00538979	PDK3;PDPR;PDP2	transferase complex	10	0.0335856	FBXO44;PIK3R2;ORMDL2;ULK1;CKS1B;ATG13;TRPC4AP;DCAF16;DDB1;PRKAA1	negative regulation of cell death	33	0.0219487	RPS6KA3;DFFA;FXN;HYPK;XRCC2;EEF2K;BMP7;SEMA5A;DSTYK;FGFR1;KDM2B;REL;VHL;BCL6;PEA15;GPI;GSK3B;EN2;CBL;TMBIM4;IKBKG;BTG2;GNAI2;RAD18;GATA2;TGFBR1;BHLHB9;MTRNR2L1;TYRO3;BNIP2;WDR73;WNK3;PIM3	response to nutrient	7	0.0192639	P2RX3;MTHFR;CD3E;CASTOR2;DNMT3B;SNAI2;COL1A1
activation of protein kinase activity	9	0.00996502	HMGB1;IL6R;GNG3;MAPKAPK2;MAP4K2;STK11;SYK;EFNA5;PEA15	positive regulation of transforming growth factor beta production	1	0.0459386	MYB	basolateral plasma membrane	18	0.00541981	RHCG;PALM;DSTYK;SLC4A1;ATP2B1;STX2;IL6R;SLC29A2;SLC29A1;GM2A;ITGA3;ANK1;MAP4K2;VSIG1;SLC4A4;BMPR2;KCNJ10;MPZ	response to dexamethasone	2	0.0337624	STAR;NR3C1	ribonucleotide metabolic process	19	0.0220164	PDK1;FXN;PANK2;ARNT;PDP2;THEM4;DHTKD1;CYCS;PANK3;ACSL6;ELOVL5;GPI;PFKFB3;HMGCS1;ENTPD5;PGM2L1;SCD;RAN;PFKFB2	positive regulation of cell death	15	0.0193538	HMGB1;SOD2;CAV1;CDKN1A;REST;STK4;UBE2Z;BID;SKIL;NTRK3;HMGA2;BTG1;PPM1F;JMY;CASP2
mononuclear cell proliferation	8	0.0099905	HMGB1;BCL2;IL6R;LEF1;SYK;SDC4;SPN;IL2RA	nucleosome disassembly	1	0.0459386	SMARCD1	regulation of axon extension	10	0.00544633	RAB21;VEGFA;DPYSL2;WNT3;NTN1;SRF;GDI1;BMPR2;SEMA5A;PLXNA3	axon regeneration	2	0.0337624	NTRK3;EPHA4	leukocyte activation	38	0.0221549	MYB;HMGB1;IKZF3;RAB27A;TIRAP;NFATC2;KCMF1;POU2F2;IL6R;CD1D;F2RL1;SKAP2;HPSE;TSPAN14;TMIGD2;LDLR;EFNB2;BTK;BCL6;GPI;PTGES2;ONECUT1;EEF1A1;FKBP1A;CBL;QSOX1;GATA2;CAB39;RIF1;LILRA2;NFASC;TYRO3;GPR183;LAMTOR1;RAB5B;MAPK1;KLF6;CYB5R3	production of miRNAs involved in gene silencing by miRNA	3	0.019788	ESR1;AGO3;AGO2
heterochromatin	4	0.0102151	CBX2;DDX6;CBX5;CBX6	SWI/SNF complex	1	0.0459386	SMARCD1	response to growth factor	44	0.00545339	CDH5;RNF165;CAV1;GLG1;DSTYK;DKK3;MAPK14;CCBE1;CREB1;MYOCD;VEGFA;ACAP2;ERRFI1;PML;GRB2;NDST1;LEF1;SMAD4;PAX2;FKBP8;PLCG1;CRB2;FGF9;MDM2;XIAP;MAPKAPK2;SPRED1;RAP1A;ITGA3;ELK1;EEF2K;LIMS1;TIAL1;SYAP1;MAPK1;HEYL;STK11;GTF2F1;ACVR2A;FSTL3;TGFBR1;POLR2E;BMPR2;EHD1	regulation of NIK/NF-kappaB signaling	3	0.0337691	RHOA;AGO1;NFAT5	organophosphate metabolic process	37	0.0224918	IRS1;PDK1;FXN;PANK2;PIKFYVE;G6PC;H6PD;SMG1;GDE1;ARNT;DGKH;PDP2;THEM4;DHTKD1;CYCS;ATG14;FGFR1;GFPT1;PLA2G12A;PANK3;ACSL6;LDLR;ELOVL5;GPI;PFKFB3;HMGCS1;MTMR3;ENTPD5;PGM2L1;SOCS7;MTMR9;CDIPT;SCD;RAN;MAPK1;PFKFB2;SAMD8	interleukin-12-mediated signaling pathway	3	0.019788	SOD2;LMNB1;PPIA
cell motility	27	0.0102195	OPHN1;HMGB1;SOD2;CAV1;PPIA;MET;BCL2;CDK6;IL6R;ANKS1A;RFX3;MYOCD;LAMC1;LEF1;SEMA4G;CCR5;SATB2;ITGA3;CCL22;PIK3R2;SYK;VASH1;EMX2;SDC4;SRCIN1;TCAF1;SPN	costamere	1	0.0459386	ILK	negative regulation of growth	20	0.00549839	ULK2;CDKN1A;GJA1;PTK6;PML;CDKN1B;SMAD4;WNT3;SESN2;NTN1;EI24;NPR1;WWC1;STK4;STK11;PLAC8;TP53;BMPR2;SEMA5A;PLXNA3	positive regulation of peptidase activity	4	0.0338091	CYCS;RHOA;PPM1F;EPHA4	cellular carbohydrate metabolic process	12	0.022672	IRS1;PDK1;HMGB1;B3GNT2;G6PC;SLC35B4;GSK3B;PPP1R3B;PFKFB3;PGM2L1;PMAIP1;PFKFB2	genitalia development	3	0.019788	ESR1;WNT9B;AR
localization of cell	27	0.0102195	OPHN1;HMGB1;SOD2;CAV1;PPIA;MET;BCL2;CDK6;IL6R;ANKS1A;RFX3;MYOCD;LAMC1;LEF1;SEMA4G;CCR5;SATB2;ITGA3;CCL22;PIK3R2;SYK;VASH1;EMX2;SDC4;SRCIN1;TCAF1;SPN	anchored component of external side of plasma membrane	1	0.0459386	RTBDN	symbiont process	48	0.00553047	DDX6;PABPN1;CD55;CCR5;ULK2;HACD3;CAV1;CBX5;PSMB5;ABI2;CRTC1;PPIA;CREB1;NUP43;PML;GRB2;EIF4H;REST;RTN3;LEF1;VPS37B;RAB7A;FKBP8;CFL1;PROX1;PLCG1;EXOC7;MDM2;PDE12;ITGA2;NFX1;TARDBP;SUV39H1;AP2M1;MAPK1;RNF216;RAB11FIP4;ZC3HAV1;MCTS1;TP53;SYK;CCNT1;PIK3R1;LARP1;POLR2E;ATF7IP;RAB43;VAMP8	cellular response to growth factor stimulus	9	0.0338668	STAR;NR3C1;RHOA;SKIL;NTRK3;COL1A1;ZFP36L2;FRS2;IREB2	kinase binding	25	0.0226831	IRS1;MAP3K2;RPS6KA3;MAVS;FAM83D;CDK9;ELP2;TIRAP;LIMS1;PIWIL1;PTPN14;CRK;DBF4;PRKAR2A;SAMD5;BCL2L11;CTNND1;GSK3B;EEF1A1;FAM83H;CBL;ADD2;CAB39;MAPK1;PFKFB2	mammary gland morphogenesis	3	0.019788	CAV1;ESR1;AR
response to interleukin-2	2	0.0102534	SYK;IL2RA	adherens junction organization	2	0.0462634	PPM1F;CADM2	regulation of cell cycle G1/S phase transition	14	0.00568901	CCND2;CTDSPL;CDKN1A;PML;CDKN1B;MDM4;BTG2;CNOT6L;MDM2;SENP2;PSME3;TFDP2;ZNF655;TP53	protein transport	20	0.0345433	TNPO1;FFAR4;ZDHHC18;PIK3R2;VPS13D;MCL1;ARF1;SRSF7;TXNIP;PTPN14;ATG13;INSIG1;KCNB1;RBM8A;HOOK3;COL1A1;PPM1F;SEC16A;PRKAA1;C5orf30	carbohydrate derivative biosynthetic process	25	0.0230253	PDK1;ST3GAL1;B3GNT2;PANK2;BMPR2;UGGT1;ARNT;PDP2;GNPNAT1;DHTKD1;GFPT1;PANK3;ACSL6;ALG1;ELOVL5;GPI;SDC2;PFKFB3;TMEM59;ENTPD5;PGM2L1;SCD;PFKFB2;CHSY1;ASGR2	neuron part	31	0.0199517	OPHN1;SLC38A2;RAB21;P2RX3;GRID1;CACNG8;HMGB1;SAMD4A;SHISA9;PALM;PLCB4;ADAM22;ORAI2;CD3E;RAP1GAP2;MINK1;AGO2;TMEM50A;SYT7;MYO10;NCMAP;FSTL3;NTRK3;GLUL;KCNB1;RBM8A;EPHA4;PRKAA1;FCHO2;SV2C;IGF1R
regulation of vascular smooth muscle cell differentiation	2	0.0102534	SOD2;MYOCD	cellular response to carbohydrate stimulus	2	0.0462634	UBTF;MEN1	Oxytocin signaling pathway	14	0.00568901	CACNG8;CDKN1A;PPP1R12A;NPR1;ADCY6;PRKAB1;CAMK2G;ELK1;EEF2K;MAPK1;CALML3;ADCY2;CAMK2A;MYLK3	receptor internalization	3	0.0345872	ARF1;LRPAP1;GRK3	tRNA processing	7	0.0230777	USP14;ELP2;GRSF1;RPP25;METTL6;TRMT10C;TRMT9B	mRNA processing	12	0.0200488	SF3B3;MBNL3;REST;PRPF4B;RSRC1;SNU13;CPSF7;GTF2H1;NCBP3;RBM8A;QKI;CNOT6L
miRNA mediated inhibition of translation	2	0.0102534	TNRC6B;TNRC6A	urogenital system development	3	0.0464667	ILK;TGFBR1;ARID5B	positive regulation of cell adhesion	28	0.00574423	CD55;PLEKHA2;HMGB1;CAV1;UTRN;PAK3;TRIOBP;IL6R;VEGFA;GRB2;CDK6;VAV3;SDC4;RARA;CALR;EMID1;ITGA2;FMN1;ITGA3;LIMS1;IL2RA;TNFSF14;FSTL3;SYK;ZBTB16;PIK3R1;IL23R;ADAM19	cell surface receptor signaling pathway involved in cell-cell signaling	8	0.0348729	TNRC6B;TNRC6C;RHOA;AGO1;COL1A1;DDB1;PRKAA1;SIAH2	protein folding	10	0.0231232	DFFA;UGGT1;MESD;LMAN2L;GNB4;FKBP1A;GNAI2;ENTPD5;DNAJC24;HSPA4L	response to oxidative stress	11	0.0202506	SOD2;MAPK13;FXN;ETS1;PSMB5;SESN3;FER;BTG1;COL1A1;PRKAA1;MTF1
negative regulation of translation, ncRNA-mediated	2	0.0102534	TNRC6B;TNRC6A	transcription coregulator activity	4	0.0465991	CITED4;SMARCD1;JMY;ARID5B	positive regulation of glucose metabolic process	6	0.00585466	HMGB1;ARPP19;DYRK2;PTPN2;AKT2;PHKG2	cellular macromolecule catabolic process	13	0.0351591	TNPO1;FBXO44;TRIM58;TNRC6B;TNRC6C;AGO1;TRIM67;TRPC4AP;RBM8A;ZFP36L2;DDB1;EPHA4;SIAH2	ephrin receptor binding	3	0.0231653	CRK;EFNB2;CBL	P-body	4	0.0203625	SAMD4A;AGO3;DDX6;AGO2
regulation of translation, ncRNA-mediated	2	0.0102534	TNRC6B;TNRC6A	vacuolar part	4	0.0468565	AP2M1;PRELP;OCA2;CYB5R3	positive regulation of axon extension	6	0.00585466	VEGFA;NTN1;SRF;GDI1;BMPR2;SEMA5A	regulation of protein targeting to mitochondrion	2	0.0352177	ATG13;PRKAA1	phosphatidylinositol bisphosphate phosphatase activity	3	0.0231653	PIKFYVE;MTMR3;MTMR9	lipid homeostasis	5	0.020559	FITM2;ACACA;CAV1;INSIG1;PRKAA1
muscle organ development	10	0.0102885	CAV1;BCL2;MYOCD;FXR1;LEF1;SMAD4;MYH14;BASP1;BTG2;HEYL	negative regulation of cellular response to growth factor stimulus	2	0.0468616	CD109;TGFBR1	activation of JUN kinase activity	6	0.00585466	MAP3K9;HACD3;MAP4K2;MAPK8IP3;SYK;TAOK1	regulation of intracellular signal transduction	19	0.0354012	MGAT5;FNIP1;FFAR4;PIK3R2;MCL1;GNAI1;RHOA;AGO1;TRIM67;NFAT5;CASTOR2;DOT1L;ELP2;SKIL;NTRK3;JMY;EPHA4;FRS2;PRKAA1	Biosynthesis of unsaturated fatty acids	3	0.0231653	ELOVL5;ACOX1;SCD	positive regulation of apoptotic process	14	0.0207134	HMGB1;SOD2;CAV1;REST;STK4;UBE2Z;BID;SKIL;NTRK3;HMGA2;BTG1;PPM1F;JMY;CASP2
dendritic spine	6	0.0104475	OPHN1;PALM;FXR1;PRRT2;SHISA9;FRMPD4	response to UV	2	0.0468616	MEN1;GEN1	phosphotyrosine residue binding	6	0.00585466	SHB;ABL2;GRB2;MAPK1;SYK;PIK3R1	cellular transition metal ion homeostasis	3	0.0354155	ARF1;SLC30A9;IREB2	B cell receptor signaling pathway	5	0.0232567	NFATC2;BTK;GSK3B;IKBKG;MAPK1	mammary gland alveolus development	2	0.0209148	ESR1;AR
positive regulation of transferase activity	14	0.0104678	IRS1;HMGB1;IL6R;AKAP13;GNG3;MAPKAPK2;DIRAS2;MAP4K2;STK11;SYK;EFNA5;SDC4;SRCIN1;PEA15	regulation of chromosome organization	3	0.0475243	MYB;UBE2N;GEN1	regulation of response to endoplasmic reticulum stress	9	0.00595373	CAV1;SYVN1;YOD1;PTPN2;GRINA;UBE2G2;PIK3R1;USP14;BAK1	regulation of actin filament-based process	6	0.0354545	ARF1;RHOA;TMOD2;NTRK3;PPM1F;JMY	regulation of innate immune response	15	0.0234025	HMGB1;RPS6KA3;MAVS;TSPAN6;TIRAP;PVR;CRK;CD1D;IRAK4;F2RL1;BTK;IKBKG;LILRA2;TYRO3;CLEC12B	mammary gland lobule development	2	0.0209148	ESR1;AR
positive regulation of RNA metabolic process	29	0.0105421	HMGB1;HNF4A;MET;RFX3;MYOCD;CELF4;REST;KPNA6;RPS6KA5;PPP1R12A;LEF1;SMAD4;MYCN;PHF19;ATXN7L3;POU2F1;PLAGL2;TNRC6B;SATB2;SMAD2;ELK1;MNT;BTG2;HEYL;PIK3R2;NFIC;CNOT6L;TNRC6A;TP53INP2	regulation of histone modification	2	0.0480666	MYB;UBE2N	peptidyl-asparagine modification	5	0.00611426	SYVN1;UGGT1;MAGT1;UBE2G2;HIF1AN	cellular ketone metabolic process	4	0.0355859	STAR;ADIPOR2;NCOR2;INSIG1	ncRNA metabolic process	20	0.0235066	PNPT1;CDK9;USP14;ELP2;DIS3L;TARS2;PIWIL1;POU2F2;GRSF1;QRSL1;PHAX;POU2F1;RPP25;METTL6;TRMT10C;NOL9;TRMT9B;NABP1;RPRD2;RAN	regulation of nuclear-transcribed mRNA catabolic process, deadenylation-dependent decay	2	0.0209148	AGO2;ZFP36L2
response to electrical stimulus	3	0.0105877	PALM;REST;BTG2	regulation of response to stress	7	0.048107	UBE2N;MEN1;TAOK1;TBXA2R;TRPC3;CD109;MAP3K9	positive regulation of transcription, DNA-templated	84	0.0062242	SPIB;KPNA6;CREBRF;IL5;PHF19;HMGB1;MICAL2;ESR1;GABPB1;MAPK14;MACC1;CRTC1;CREB1;SMARCC1;RFX3;MYOCD;VEGFA;E2F5;PGR;REST;PTGES2;RPS6KA5;PPP1R12A;LEF1;SMAD4;SSBP2;MYCN;RPS6KA3;PLAGL2;KLF13;RARA;ATXN7L3;PAX2;AGO2;NEK4;SESN2;NRF1;PROX1;RORA;S1PR1;DHX33;SRF;DVL1;ZNF268;WWC1;SENP2;KAT7;TARDBP;ELK1;TFDP2;MAFF;PKNOX1;MAPK1;ZNF485;GMEB1;HEYL;MLXIP;CREB3L2;RPS6KA4;FOSL1;GTF2F1;ACVR2A;IKZF3;BCAS3;PLAC8;CNBP;TP…	regeneration	4	0.0355859	ULK1;NTRK3;EPHA4;AKIRIN1	positive regulation of hemopoiesis	9	0.0237633	MYB;HMGB1;ARNT;BTK;BCL6;ETS1;ATXN1L;GATA2;ACVR1B	positive regulation of nuclear-transcribed mRNA catabolic process, deadenylation-dependent decay	2	0.0209148	AGO2;ZFP36L2
RNA stabilization	3	0.0105877	MAPKAPK2;SYNCRIP;LARP1	melanin metabolic process	1	0.0482983	OCA2	positive regulation of CREB transcription factor activity	4	0.00628154	CRTC1;VEGFA;RPS6KA5;RPS6KA4	glycerolipid biosynthetic process	5	0.0361223	PIK3R2;ARF1;PIKFYVE;PLA2G12A;FRS2	positive regulation of pathway-restricted SMAD protein phosphorylation	4	0.0238329	BMPR2;BMP7;TGFBR1;ACVR1B	negative regulation of vascular smooth muscle cell proliferation	2	0.0209148	SOD2;CDKN1A
homeostatic process	31	0.0106345	MYLIP;IRS1;HMGB1;SOD2;CAV1;HNF4A;MET;RALY;TPCN2;BCL2;CDK6;CCNE2;SMAD4;KCTD7;CCR5;STC2;ZBTB20;GNG3;RAB11B;PTPRN2;SCD;TMEM97;PIK3R2;STK11;SYK;EFNA5;SMG1;TP53INP2;GRAMD1B;IL2RA;USP7	mitotic G2 DNA damage checkpoint	1	0.0482983	TAOK1	negative regulation of systemic arterial blood pressure	4	0.00628154	SOD2;GPR37L1;NTSR1;BMPR2	microtubule-based movement	5	0.0361223	TNPO1;TRIM58;ARL3;KIF6;TRAF3IP1	regulation of glutamate receptor signaling pathway	4	0.0238329	SHISA9;CACNG7;NLGN2;NETO2	apicolateral plasma membrane	2	0.0209148	PALM;OCLN
neuron spine	6	0.011042	OPHN1;PALM;FXR1;PRRT2;SHISA9;FRMPD4	type B pancreatic cell proliferation	1	0.0482983	MEN1	sulfur amino acid biosynthetic process	4	0.00628154	MTAP;MRI1;MTHFR;MTHFD1	regulation of erythrocyte differentiation	2	0.036697	TRIM58;TAL1	response to epidermal growth factor	4	0.0238329	SYAP1;EEF1A1;CBL;MAPK1	oxidoreductase activity, oxidizing metal ions	2	0.0209148	FXN;HEPHL1
exocytosis	18	0.0110742	HMGB1;PPIA;REST;PDXK;SYT7;SRP14;RAB11B;RAB5B;PTPRN2;PRRT2;NFASC;TSPAN14;SYK;MLEC;SDC4;SRCIN1;ANK1;GSK3B	negative regulation of chondrocyte differentiation	1	0.0482983	TGFBR1	negative regulation of vascular smooth muscle cell proliferation	4	0.00628154	SOD2;CDKN1A;MYOCD;CDKN1B	negative regulation of fat cell differentiation	2	0.036697	INSIG1;ZFP36L2	protein phosphorylated amino acid binding	4	0.0238329	IRS1;CRK;CBL;MAPK1	RNA cap binding	2	0.0209148	AGO2;NCBP3
cellular carbohydrate metabolic process	8	0.011091	PPP1R1A;IRS1;HMGB1;ARPP19;IGFBP4;GNE;PHKG2;GSK3B	response to tumor cell	1	0.0482983	RBMS3	positive regulation of organelle organization	39	0.0063334	SURF4;IL5;PHF19;ABI2;VEGFA;PML;GRB2;YWHAZ;CDKN1B;RPS6KA5;SMAD4;HPS4;SDC4;CNOT6L;CFL1;CCL11;PROX1;BBC3;FMN1;KAT7;GPSM2;TFDP2;MAPK1;OPTN;ANK1;UBE2N;ATL3;RPS6KA4;BCAS3;AKT2;TP53;TGFBR1;MYLK3;MIEF1;SEMA5A;WIPF3;PPIF;BAK1;PLXNA3	negative regulation of striated muscle tissue development	2	0.036697	FRS2;AKIRIN1	Amino sugar and nucleotide sugar metabolism	4	0.0238329	GNPNAT1;GFPT1;GPI;CYB5R3	response to cold	3	0.0209464	P2RX3;METRNL;PRKAA1
positive regulation of tumor necrosis factor superfamily cytokine production	4	0.0111649	HMGB1;ZBTB20;MAPKAPK2;SPN	decidualization	1	0.0482983	MEN1	Hippo signaling pathway	14	0.0063735	CCND2;PPP2R1B;YWHAZ;LEF1;SMAD4;WNT3;CRB2;BBC3;DVL1;WWC1;WNT9B;TGFBR1;CSNK1E;BMPR2	core promoter binding	2	0.036697	NR3C1;AGO1	Fatty acid metabolism	4	0.0238329	ACSL6;ELOVL5;ACOX1;SCD	prostate gland development	3	0.0209464	ESR1;AR;FRS2
neuron maturation	3	0.0113103	BCL2;ANKS1A;NFASC	negative regulation of cardiac muscle cell apoptotic process	1	0.0482983	ILK	cellular response to oxygen-containing compound	63	0.006668	PABPN1;ABL2;CD55;CCR5;P2RX3;HMGB1;SOD2;CAV1;ESR1;VAMP2;MAPK14;STC1;CYBB;GPR37L1;ATP2B1;PDK3;CREB1;PTK6;SMARCC1;TRA2B;ERRFI1;GRB2;RARA;WNT3;PAX2;SESN2;ATP6V1A;RAB11B;SLC29A1;PRLR;RORA;MDM2;ADCY6;SRF;RAP1A;ITGA2;OSBPL8;FAM210B;FANCC;PTPN2;ZNF106;WNT9B;ELK1;EEF2K;LDOC1;SYAP1;MAPK1;ADCY2;RAB10;CAMK2A;TBXA2R;AKT2;TP53;ACACA;PIK3R1;PRKAR2A;RRAGD;CERS1;LARP1;SSTR2;FFAR2;EFNA5;PPIF	histone-lysine N-methyltransferase activity	2	0.036697	SETD7;DOT1L	myeloid cell activation involved in immune response	20	0.023915	HMGB1;RAB27A;KCMF1;F2RL1;HPSE;TSPAN14;BTK;GPI;PTGES2;EEF1A1;CBL;QSOX1;GATA2;CAB39;LILRA2;NFASC;LAMTOR1;RAB5B;MAPK1;CYB5R3	response to amino acid starvation	3	0.0209464	SLC38A2;CDKN1A;SESN3
phosphatase inhibitor activity	3	0.0113103	PPP1R1A;PPP1R11;ARPP19	negative regulation of neural precursor cell proliferation	1	0.0482983	ILK	animal organ morphogenesis	58	0.00670815	TSKU;EPHB1;MYBPC1;CAV1;MICAL2;ESR1;GLG1;MAPK14;STC1;STX2;TRIOBP;SMARCC1;ACTA1;VEGFA;E2F5;PGR;ERRFI1;PML;SUFU;NDST1;NSD2;LEF1;SMAD4;DDR1;RARA;PAX2;NTN1;CCL11;PROX1;CRB2;S1PR1;FGF9;MDM2;BASP1;PARVA;SRF;DVL1;ITGA2;HOXC8;FANCC;FMN1;WNT9B;AP2M1;MAPK1;HEYL;MTHFD1;SLC24A4;SYK;TGFBR1;CABP4;FEM1B;NFIC;BMPR2;KDM2B;BAK1;FOXE1;VWA1;PLXND1	ubiquitin ligase complex	5	0.0370982	FBXO44;CKS1B;TRPC4AP;DCAF16;DDB1	B cell differentiation	7	0.0239961	IKZF3;POU2F2;BTK;BCL6;ONECUT1;GPR183;KLF6	protein exit from endoplasmic reticulum	3	0.0209464	YOD1;INSIG1;SEC16A
lung development	6	0.0113481	HMGB1;ATXN1L;MYOCD;ERRFI1;SMAD2;ITGA3	clathrin coat of coated pit	1	0.0482983	AP2M1	regulation of myeloid cell differentiation	18	0.00683529	IL5;HMGB1;MAPK14;CREB1;CDK6;LEF1;KLF13;RARA;TOB2;FAM210B;PTPN2;ACVR2A;FSTL3;ZBTB16;PIK3R1;GPR55;IL23R;NCAPG2	production of miRNAs involved in gene silencing by miRNA	2	0.0381998	AGO1;NCOR2	purine ribonucleoside triphosphate biosynthetic process	7	0.0239961	ARNT;DHTKD1;GPI;PFKFB3;ENTPD5;PGM2L1;PFKFB2	Nucleotide excision repair	3	0.0209464	POLD3;GTF2H1;DDB1
regulation of mRNA stability	5	0.011385	FXR1;MAPKAPK2;SYNCRIP;LARP1;CNOT6L	endolysosome	1	0.0482983	AP2M1	mesoderm development	12	0.00686359	VEGFA;LEF1;SMAD4;WNT3;PAX2;CRB2;SRF;ITGA2;ITGA3;ACVR2A;IKZF3;BMPR2	negative regulation of muscle organ development	2	0.0381998	FRS2;AKIRIN1	mesoderm development	7	0.0239961	BMPR2;IKZF3;MESD;BMP7;FGFR1;BTK;GPI	regulation of BMP signaling pathway	4	0.021177	RNF165;FSTL3;SKI;SKIL
carbohydrate metabolic process	13	0.0113907	H6PD;PPP1R1A;IRS1;HMGB1;LDHA;ARPP19;ZBTB20;IGFBP4;GNE;ST3GAL2;PHKG2;MLEC;GSK3B	response to acid chemical	3	0.0485938	MYB;CASTOR2;SMARCD1	Cell cycle	12	0.00686359	CCND2;CDKN1A;E2F5;CDK6;YWHAZ;CDKN1B;CCNE2;SMAD4;MDM2;TFDP2;TP53;E2F2	1-phosphatidylinositol-3-kinase activity	2	0.0381998	PIK3R2;FRS2	regulation of cell death	50	0.0244821	DCC;MYB;HMGB1;RPS6KA3;DFFA;FXN;APOPT1;HYPK;IKZF3;XRCC2;SOX7;EEF2K;BMP7;GRIN2B;SEMA5A;PHLDA3;DSTYK;CYCS;FGFR1;KDM2B;REL;VHL;TNFAIP8L1;BCL2L11;EFNB2;BTK;BCL6;PEA15;GPI;GSK3B;EN2;CBL;TMBIM4;IKBKG;BTG2;GNAI2;RAD18;GATA2;TGFBR1;BHLHB9;RILPL1;MAP3K9;MTRNR2L1;STK4;TYRO3;PMAIP1;BNIP2;WDR73;WNK3;PIM3	negative regulation of translation	5	0.0211976	SAMD4A;AGO3;AGO2;ZFP36L2;CNOT6L
peptide transport	33	0.0114662	IRS1;HMGB1;PPIA;HNF4A;PPP1R11;COPZ1;RFX3;REST;KPNA6;AGK;VPS37B;SYT7;SRP14;ZDHHC22;RPH3A;RAB11B;RAB5B;SMAD2;PTPRN2;GDI1;PIK3R2;RABGAP1L;SYK;MIEF1;EFNA5;PTPN14;STX6;SMG1;SRCIN1;TCAF1;RBM8A;XPO4;GSK3B	cell-substrate adhesion	3	0.0485938	MEN1;ILK;PPM1F	Oocyte meiosis	12	0.00686359	PPP2R1B;PGR;YWHAZ;CCNE2;RPS6KA3;ADCY6;CAMK2G;MAPK1;CALML3;ADCY2;CAMK2A;SGO1	protein heterodimerization activity	7	0.0385689	ZHX3;ADIPOR2;PIK3R2;MCL1;ARF1;TAL1;KCNB1	Human immunodeficiency virus 1 infection	10	0.0244894	NFATC2;CRK;GNB4;IRAK4;CYCS;AP1S1;LIMK1;IKBKG;GNAI2;MAPK1	lipid phosphorylation	5	0.0211976	ESR1;PIP4K2C;PIKFYVE;SOCS7;FRS2
regulation of protein phosphorylation	25	0.011528	HMGB1;CAV1;MET;BCL2;IL6R;GMFB;MYOCD;ERRFI1;RPS6KA5;CCNE2;SMAD4;AKAP13;IGFBP4;GNG3;MAPKAPK2;DIRAS2;CCL22;PIK3R2;MAP4K2;STK11;SYK;EFNA5;SDC4;SRCIN1;PEA15	negative regulation of protein modification process	4	0.0489447	MEN1;ILK;CD109;PPM1F	organonitrogen compound biosynthetic process	97	0.00689565	IBA57;MTAP;RPL28;DHFR2;UGCG;HACD3;YTHDF1;ALG9;SAMD4A;SPTLC3;SYVN1;UHMK1;BACE2;A4GALT;PDK3;TRUB2;PRPS1;CELF4;CASC3;IGF2BP1;STARD7;EIF4H;AGK;NDST1;NME4;MGAT4A;FXR1;PDXK;UST;LDHA;RPS6KA3;SDC4;PCYT1A;MRRF;RARA;PDPR;AGO2;SOAT1;BTG2;CNOT6L;SESN2;CALR;GTPBP1;NPR1;ADCY6;CAPRIN1;RPS24;DHX33;UNK;ADA2;ITGA2;MRI1;ALG1;CELF1;PIGX;UGGT1;ZC3H15;MTHFR;MRPS23;MGAT5B;MAGT1;EEF2K;QPRT;ST3GAL2;CHST6;GALNT6;ST3GAL1;A…	steroid hormone mediated signaling pathway	4	0.0386656	NR3C1;CRY2;RHOA;NCOR2	transforming growth factor beta receptor signaling pathway	9	0.0245155	USP15;BMPR2;ONECUT1;CD109;CBL;PEG10;TGFBR1;ACVR1B;NPNT	positive regulation of programmed cell death	14	0.021769	HMGB1;SOD2;CAV1;REST;STK4;UBE2Z;BID;SKIL;NTRK3;HMGA2;BTG1;PPM1F;JMY;CASP2
positive regulation of apoptotic signaling pathway	6	0.0116601	CAV1;BCL2;MOAP1;PLAGL2;PEA15;GSK3B	cellular glucose homeostasis	2	0.0492828	UBTF;MEN1	Acute myeloid leukemia	8	0.00692318	PML;GRB2;LEF1;RARA;MAPK1;AKT2;ZBTB16;PIK3R1	Chemokine signaling pathway	4	0.0386656	PIK3R2;GNAI1;RHOA;GRK3	phosphoprotein phosphatase activity	9	0.0245155	PTPN14;PDP2;CYCS;PPM1K;PPP1R3B;MTMR3;CDC14B;PPM1L;PTP4A1	cell migration	26	0.0217752	OPHN1;MGAT5;HMGB1;SOD2;CAV1;IRAK4;MINK1;AGO2;ETS1;CD151;SNAI2;FER;NTRK3;SDC3;SOCS7;PADI2;PPIA;IL6R;GLUL;BTG1;RREB1;COL1A1;PPM1F;EPHA4;C5orf30;IGF1R
negative regulation of mitotic cell cycle phase transition	6	0.0116601	CNOT4;BCL2;FOXN3;MDM4;BTG2;CNOT6L					positive regulation of cell cycle arrest	9	0.00702285	CDKN1A;PML;CDKN1B;MDM4;BTG2;CNOT6L;MDM2;TFDP2;TP53	regulation of steroid metabolic process	3	0.0388308	STAR;INSIG1;PRKAA1	regulation of chemokine production	5	0.0245392	HMGB1;MAVS;TIRAP;IL6R;F2RL1	import into cell	17	0.0218051	OPHN1;RAB21;CACNG8;HMGB1;CAV1;RAB22A;FNBP1;SYT7;CD151;MYO10;SNX18;PIKFYVE;LRPAP1;GLUL;ABCC9;GRK3;FCHO2
extrinsic apoptotic signaling pathway	7	0.011713	CAV1;BCL2;IL6R;MOAP1;PSME3;PEA15;GSK3B					signaling adaptor activity	9	0.00702285	SHB;SH2B3;SKAP2;GRB2;VAV3;LASP1;SH3RF1;MAPK8IP3;PIK3R1	TOR signaling	3	0.0388308	FNIP1;CASTOR2;PRKAA1	regulation of leukocyte mediated cytotoxicity	5	0.0245392	PVR;CRK;CD1D;F2RL1;CLEC12B	negative regulation of programmed cell death	19	0.0219009	RNF144B;SOD2;CAV1;CDKN1A;AREL1;UBE2Z;AR;GRINA;FXN;MTDH;SNAI2;BID;NTRK3;HMGA2;DDB1;EPHA4;CASP2;PRKAA1;IGF1R
metanephric mesenchyme development	2	0.0117449	SMAD4;BASP1					regulation of cellular component size	26	0.00708943	ULK2;RAB21;ABI2;PAK3;TRIOBP;CREB1;VEGFA;GRB2;VAV3;ADD1;DPYSL2;WNT3;PEX11B;CFL1;NTN1;CCL11;SRF;FMN1;AP2M1;GDI1;BMPR2;SEMA5A;WIPF3;EFNA5;SLC12A3;PLXNA3	negative regulation of cellular macromolecule biosynthetic process	15	0.0388704	FNIP1;ZHX3;NR3C1;CRY2;TNRC6B;TNRC6C;TAL1;AGO1;TXNIP;NCOR2;DOT1L;SKIL;PPM1F;ZFP36L2;IREB2	pyridine-containing compound metabolic process	8	0.0246952	H6PD;ARNT;DHTKD1;GPI;PFKFB3;ENTPD5;PGM2L1;PFKFB2	cellular response to hydrogen peroxide	4	0.0220112	MAPK13;FXN;ETS1;PRKAA1
entry of bacterium into host cell	2	0.0117449	CAV1;MET					ubiquitin-like protein transferase activity	29	0.00717632	MYLIP;RNF165;RNF144B;FBXW8;SYVN1;KLHL21;FBXO9;PML;MDM4;UBL4A;UBE2S;SH3RF1;PPP1R11;MDM2;XIAP;FBXO27;UBE2G2;ZYG11B;RNF216;RNF170;UBE2N;WSB1;RNF125;PIAS2;FEM1B;RNF150;FBXL19;RNF11;UBE2H	purine ribonucleoside triphosphate metabolic process	5	0.0390986	AK2;CYCS;RHOA;COX10;PRKAA1	purine nucleoside triphosphate biosynthetic process	7	0.0249393	ARNT;DHTKD1;GPI;PFKFB3;ENTPD5;PGM2L1;PFKFB2	negative regulation of BMP signaling pathway	3	0.0221413	FSTL3;SKI;SKIL
V(D)J recombination	2	0.0117449	HMGB1;LEF1					cell growth	32	0.00728428	CSNK2A1;ULK2;RAB21;CDKN1A;GJA1;MYOCD;VEGFA;PML;CDKN1B;LEF1;SMAD4;DPYSL2;RPS6KA3;DDR1;IGFBP4;WNT3;SESN2;NTN1;EI24;NPR1;SRF;DVL1;GDI1;STK11;TP53;TGFBR1;BMPR2;SEMA5A;KDM2B;EFNA5;PLXNA3;RAPH1	purine nucleoside diphosphate biosynthetic process	1	0.0396208	AK2	regulation of endothelial cell proliferation	7	0.0249393	HMGB1;BMPR2;ARNT;SEMA5A;FGFR1;GATA2;TGFBR1	dsRNA processing	3	0.0221413	ESR1;AGO3;AGO2
chromatin	12	0.0117872	HMGB1;POGZ;RFX3;MYOCD;SMAD4;MYCN;CBX2;GLYR1;SMAD2;DDX6;CBX5;CBX6					ameboidal-type cell migration	27	0.00730568	TNS1;HMGB1;LGALS8;MAPK14;STC1;PAK3;VEGFA;PML;SDC4;AGO2;CALR;CFL1;PROX1;PLCG1;CRB2;SRF;SPRED1;ITGA2;ITGA3;TBXA2R;BCAS3;TGFBR1;S100A2;BMPR2;SEMA5A;VASH1;PLXND1	purine ribonucleoside diphosphate biosynthetic process	1	0.0396208	AK2	negative regulation of phosphatase activity	6	0.0250457	ENSA;GSK3B;FKBP1A;GNAI2;PPP1R26;PPP1R14C	production of small RNA involved in gene silencing by RNA	3	0.0221413	ESR1;AGO3;AGO2
regulation of hemopoiesis	10	0.0119756	HMGB1;CNOT4;ATXN1L;CDK6;LEF1;TNRC6B;TOB2;SYK;TNRC6A;IL2RA					positive regulation of biosynthetic process	105	0.00739348	SPIB;KPNA6;CREBRF;IL5;PHF19;YTHDF1;HMGB1;SAMD4A;MICAL2;ESR1;GABPB1;MAPK14;UHMK1;PAK3;CYBB;MACC1;CRTC1;TRUB2;CREB1;SMARCC1;ARPP19;RFX3;MYOCD;VEGFA;E2F5;PGR;PML;DYRK2;REST;PTGES2;FXR1;RPS6KA5;PPP1R12A;LEF1;SMAD4;SSBP2;MYCN;RPS6KA3;PLAGL2;KLF13;RARA;ATXN7L3;PAX2;AGO2;SOAT1;NEK4;SESN2;NRF1;PROX1;RORA;S1PR1;MAPKAPK2;DHX33;SRF;DVL1;ZNF268;MNT;ITGA2;WWC1;SENP2;PTPN2;KAT7;TARDBP;ELK1;TFDP2;MAFF;PKNOX1;MA…	ribonucleoside diphosphate biosynthetic process	1	0.0396208	AK2	mitotic DNA replication	2	0.025062	FGFR1;BCL6	regulation of glutamate receptor signaling pathway	3	0.0221413	CACNG8;SHISA9;MINK1
regulation of myeloid cell differentiation	7	0.0119857	HMGB1;CNOT4;CDK6;LEF1;TNRC6B;TOB2;TNRC6A					regulation of peptidase activity	29	0.00740832	CSNK2A1;SERPINA4;HMGB1;CAV1;MAPK14;VEGFA;PML;REST;LEF1;RPS6KA3;PAX2;SH3RF1;GRIN2B;CRB2;BBC3;MDM2;XIAP;CST9;PSME3;EFNA3;TNFSF14;PSMF1;USP14;SOX7;A2ML1;TNFAIP8;BAK1;ANTXR1;DHCR24	regulation of systemic arterial blood pressure by endothelin	1	0.0396208	RHOA	positive regulation of histone H3-K9 methylation	2	0.025062	MYB;RIF1	response to epidermal growth factor	3	0.0221413	SNAI2;COL1A1;ZFP36L2
negative regulation of mRNA catabolic process	3	0.0120607	MAPKAPK2;SYNCRIP;LARP1					regulation of cysteine-type endopeptidase activity involved in apoptotic process	17	0.00742783	CSNK2A1;HMGB1;VEGFA;PML;REST;LEF1;RPS6KA3;PAX2;SH3RF1;BBC3;MDM2;XIAP;TNFSF14;SOX7;TNFAIP8;BAK1;DHCR24	negative regulation of glucocorticoid receptor signaling pathway	1	0.0396208	CRY2	positive regulation of phagocytosis, engulfment	2	0.025062	F2RL1;GATA2	cellular response to interleukin-12	3	0.0221413	SOD2;LMNB1;PPIA
positive regulation of cell cycle arrest	4	0.0121699	CNOT4;MDM4;BTG2;CNOT6L					regulation of cellular carbohydrate catabolic process	3	0.00745692	HMGB1;PHKG2;PGAM1	response to iron(III) ion	1	0.0396208	IREB2	positive regulation of membrane invagination	2	0.025062	F2RL1;GATA2	positive regulation of protein phosphorylation	20	0.0222942	CAB39;HMGB1;CAV1;CDKN1A;TAOK1;STK4;AR;CD3E;TMEM189-UBE2V1;MINK1;NTRK3;HMGA2;IL6R;DAZAP2;EPHA4;FRS2;PRKAA1;SOX2;IGF1R;CDK2AP1
signaling adaptor activity	4	0.0121699	IRS1;AKAP13;LASP1;PAG1					xenophagy	3	0.00745692	LGALS8;OPTN;WIPI2	positive regulation of axon regeneration	1	0.0396208	NTRK3	cyclooxygenase pathway	2	0.025062	PTGS1;PTGES2	nuclear speck	10	0.0228449	PRPF4B;AR;RSRC1;SPRTN;HBP1;RREB1;NCBP3;RBM8A;DAZAP2;PRKAA1
regulation of viral process	6	0.0123022	PPIA;BCL2;REST;LEF1;VPS37B;LARP1					Ademetionine	3	0.00745692	MAT2A;MAT1A;AS3MT	circadian sleep/wake cycle, REM sleep	1	0.0396208	STAR	chemokine (C-X-C motif) ligand 2 production	2	0.025062	TIRAP;F2RL1	plasma membrane organization	4	0.0228652	CAV1;AR;SYT7;FCHO2
negative regulation of developmental process	18	0.0124289	MYLIP;HMGB1;CAV1;BCL2;CDK6;MYOCD;REST;LEF1;SMAD4;SEMA4G;STC2;TOB2;DDX6;GDI1;STK11;VASH1;EFNA5;GSK3B					mesoderm formation	8	0.00757532	LEF1;WNT3;PAX2;CRB2;SRF;ITGA2;ITGA3;BMPR2	intramembranous ossification	1	0.0396208	COL1A1	ER overload response	2	0.025062	BCL2L11;GSK3B	histone deacetylation	4	0.0228652	ELK4;REST;SKI;SAP30L
Cell cycle	5	0.0125578	CDK6;CCNE2;SMAD4;SMAD2;GSK3B					Long-term potentiation	8	0.00757532	PPP1R1A;RPS6KA3;GRIN2B;CAMK2G;RAP1A;MAPK1;CALML3;CAMK2A	direct ossification	1	0.0396208	COL1A1	UDP-N-acetylglucosamine biosynthetic process	2	0.025062	GNPNAT1;GFPT1	modified amino acid binding	4	0.0228652	HMGB1;MTHFR;SYT7;FCHO2
T cell activation	11	0.0125702	HMGB1;CAV1;BCL2;IL6R;LEF1;STK11;SYK;PAG1;SDC4;SPN;IL2RA					cellular response to UV	9	0.0076096	CDKN1A;MFAP4;MDM2;ACTR5;STK11;TP53;PIK3R1;CERS1;BAK1	positive regulation of cholesterol biosynthetic process	1	0.0396208	PRKAA1	dihydrolipoyl dehydrogenase complex	2	0.025062	DBT;DHTKD1	endocytosis	15	0.0231099	OPHN1;RAB21;CACNG8;HMGB1;CAV1;RAB22A;FNBP1;SYT7;CD151;MYO10;SNX18;PIKFYVE;LRPAP1;GRK3;FCHO2
positive regulation of cell adhesion	10	0.0125821	HMGB1;CAV1;CDK6;IL6R;ITGA3;SYK;ADAM19;SDC4;IL2RA;GSK3B					positive regulation of nervous system development	34	0.00761592	EPHB1;ABL2;RAB21;FBXW8;PAK3;GPR37L1;THBS2;CRTC1;PTK6;VEGFA;REST;NLGN2;RARA;WNT3;PAX2;NTN1;PROX1;CAPRIN1;SRF;DVL1;RAP1A;ITGA3;EEF2K;GDI1;HEYL;CREB3L2;ADGRL1;STK11;XRCC2;BMPR2;SEMA5A;EFNA5;PLXNA3;PLXND1	positive regulation of sterol biosynthetic process	1	0.0396208	PRKAA1	actin cortical patch	2	0.025062	WIPF3;WIPF2	negative regulation of stem cell differentiation	2	0.0231851	REST;ZFP36L2
respiratory tube development	6	0.0126324	HMGB1;ATXN1L;MYOCD;ERRFI1;SMAD2;ITGA3					positive regulation of glycogen metabolic process	4	0.00769145	HMGB1;DYRK2;AKT2;PHKG2	nuclear membrane organization	1	0.0396208	TMEM43	endocytic patch	2	0.025062	WIPF3;WIPF2	myelin assembly	2	0.0231851	NCMAP;PIKFYVE
protein binding, bridging	6	0.0126324	IRS1;CAV1;LASP1;CBX5;PAG1;ANK1					trachea development	4	0.00769145	LEF1;RARA;SRF;MAPK1	positive regulation of aspartic-type endopeptidase activity involved in amyloid precursor protein catabolic process	1	0.0396208	EPHA4	MCM complex	2	0.025062	MCM8;MCM4	fibroblast apoptotic process	2	0.0231851	BID;BTG1
secretion by cell	26	0.0126823	IRS1;HMGB1;PPIA;HNF4A;PPP1R11;GRM7;RFX3;REST;SMAD4;PDXK;SYT7;SRP14;RAB11B;RAB5B;SMAD2;PTPRN2;PRRT2;NFASC;TSPAN14;SYK;MLEC;EFNA5;SDC4;SRCIN1;ANK1;GSK3B					lipid droplet organization	4	0.00769145	BSCL2;PPIA;PNPLA3;FITM2	positive regulation of aspartic-type peptidase activity	1	0.0396208	EPHA4	glutathione binding	2	0.025062	GSTM3;PTGES2	lipid droplet organization	2	0.0231851	FITM2;PPIA
signal transduction by protein phosphorylation	18	0.0126888	IRS1;HMGB1;CAV1;MET;ERRFI1;SMAD4;AKAP13;CCR5;IGFBP4;GNG3;MAPKAPK2;DIRAS2;CCL22;PIK3R2;MAP4K2;SYK;PEA15;IL2RA					N-acetylglucosamine metabolic process	4	0.00769145	AMDHD2;GNE;CHST6;GNPNAT1	regulation of protein localization to cell cortex	1	0.0396208	GNAI1	Magnesium carbonate	2	0.025062	TRPM7;GRIN2B	phosphotransferase activity, for other substituted phosphate groups	2	0.0231851	PIGO;SAMD8
protein tyrosine kinase binding	4	0.0126934	IRS1;PITPNM3;PIK3R2;PTPN14					response to endogenous stimulus	88	0.00770051	CDH5;CREBRF;RNF165;P2RX3;HMGB1;CAV1;CDKN1A;ESR1;VAMP2;GLG1;DSTYK;DKK3;STC1;CYBB;ATP2B1;CREB1;SMARCC1;ACTA1;MYOCD;ACAP2;PGR;ERRFI1;PML;GRB2;REST;NDST1;CDKN1B;LEF1;SMAD4;RARA;PAX2;BTG2;SESN2;CALR;FKBP8;ATP6V1A;PRLR;PLCG1;CRB2;SORD;RORA;FGF9;MDM2;XIAP;ADCY6;SRF;SPRED1;RAP1A;ITGA2;OSBPL8;FAM210B;PTPN2;ZNF106;ITGA3;ELK1;EEF2K;LIMS1;TIAL1;LDOC1;SYAP1;MAPK1;ADCY2;HEYL;RAB10;FOSL1;CAMK2A;STK11;TBXA2R;GTF…	negative regulation of skeletal muscle cell differentiation	1	0.0396208	AKIRIN1	regulation of leukocyte proliferation	10	0.025194	HMGB1;IKZF3;TIRAP;NFATC2;IL6R;CD1D;TMIGD2;BTK;BCL6;GPR183	ephrin receptor activity	2	0.0231851	NTRK3;EPHA4
activated T cell proliferation	3	0.0128391	HMGB1;IL6R;IL2RA					growth	57	0.00774487	CSNK2A1;ULK2;RAB21;CDKN1A;GJA1;ESR1;MAPK14;STC1;OPA3;BNC2;CREB1;PTK6;MYOCD;VEGFA;PML;EIF4H;CDKN1B;LEF1;SMAD4;ADD1;DPYSL2;RPS6KA3;DDR1;RARA;IGFBP4;WNT3;SESN2;FKBP8;NTN1;CCL11;PROX1;EI24;S1PR1;FGF9;NPR1;BASP1;SRF;DVL1;WWC1;STK4;FMN1;GDI1;STK11;XRCC2;MCTS1;PLAC8;TP53;TGFBR1;BMPR2;SEMA5A;KDM2B;EFNA5;NCAPG2;VWA1;PLXNA3;GPAT4;RAPH1	actin polymerization-dependent cell motility	1	0.0396208	JMY	tRNA metabolic process	9	0.0252844	USP14;ELP2;TARS2;GRSF1;QRSL1;RPP25;METTL6;TRMT10C;TRMT9B	Diethylstilbestrol	2	0.0231851	ESR1;AR
regulation of cellular response to heat	3	0.0128391	MAPKAPK2;BAG1;GSK3B					negative regulation of multicellular organismal process	66	0.00782236	EPHB1;DDX6;ULK2;MYLIP;HMGB1;STC1;GPR37L1;THBS2;MYOCD;CELF4;ERRFI1;PML;SUFU;CDK6;KREMEN1;REST;CDKN1B;RPS6KA5;LEF1;SMAD4;KLF13;RARA;WNT3;PAX2;PGAM5;TOB2;CALR;NTN1;PPP1R11;FGF9;MDM2;NPR1;ADCY6;SRF;SPRED1;WWC1;STK4;PTPN2;WNT9B;GDI1;EFNA3;RNF216;RPS6KA4;STK11;TBXA2R;RNF125;PLAC8;FSTL3;S1PR2;TGFBR1;E2F2;ZBTB16;STX1B;PIK3R1;BMPR2;GPR55;CD84;IL23R;SEMA5A;VASH1;RAB11FIP1;REL;NCAPG2;WNK3;NPVF;PLXNA3	histone dephosphorylation	1	0.0396208	PPM1F	regulation of interferon-beta production	4	0.0254972	HMGB1;MAVS;TIRAP;REL	cell-cell signaling	29	0.0232294	OPHN1;P2RX3;GRID1;CACNG8;TMEM237;CAV1;SHISA9;PLCB4;REST;ESR1;AGO3;STK4;WNT9B;AR;MINK1;AGO2;SYT7;SNAI2;SKI;HMGA2;GLUL;HBP1;KCNB1;COL1A1;DDB1;EPHA4;PRKAA1;SV2C;SOX2
positive regulation of cellular biosynthetic process	32	0.0129441	IRS1;HMGB1;HNF4A;MET;RFX3;MYOCD;REST;KPNA6;FXR1;RPS6KA5;PPP1R12A;LEF1;SMAD4;MYCN;ARPP19;PHF19;ATXN7L3;POU2F1;ZBTB20;PLAGL2;MAPKAPK2;SATB2;SMAD2;ELK1;MNT;HEYL;PIK3R2;SYK;LARP1;NFIC;TP53INP2;SPN					Aldosterone synthesis and secretion	10	0.00790863	ATP2B1;CREB1;NPR1;ADCY6;CAMK2G;CALML3;ADCY2;CREB3L2;CAMK2A;MC2R	prostate glandular acinus morphogenesis	1	0.0396208	FRS2	regulation of glycogen biosynthetic process	3	0.0255153	IRS1;GSK3B;PPP1R3B	face development	3	0.0233728	CRISPLD2;SKI;COL1A1
cytoplasmic side of membrane	6	0.0129688	PALM;ERRFI1;NPTXR;GNG3;CBX6;ANK1					positive regulation of multicellular organismal process	91	0.00812097	EPHB1;CDH5;ABL2;IL5;RAB21;P2RX3;HMGB1;SOD2;CAV1;GJA1;BSCL2;NFAM1;FBXW8;MAPK14;CCBE1;PAK3;CYBB;GPR37L1;THBS2;CRTC1;CREB1;LIPG;PTK6;IL6R;RFX3;MYOCD;VEGFA;REST;NLGN2;NSD2;LEF1;SMAD4;RARA;WNT3;PAX2;TOB2;AGO2;CALR;NTN1;CCL11;PROX1;PRLR;PLCG1;CRB2;RORA;FGF9;NPR1;BASP1;MAPKAPK2;KSR2;PRKAB1;CAPRIN1;DHX33;SRF;DVL1;RAP1A;ITGA2;FAM210B;ITGA3;EEF2K;GDI1;IL2RA;HEYL;CREB3L2;ADGRL1;STK11;TBXA2R;RNF125;ACVR2A;XR…	prostate epithelial cord arborization involved in prostate glandular acinus morphogenesis	1	0.0396208	FRS2	regulation of glucan biosynthetic process	3	0.0255153	IRS1;GSK3B;PPP1R3B	response to interleukin-12	3	0.0233728	SOD2;LMNB1;PPIA
response to carbohydrate	7	0.0131225	HNF4A;LDHA;ZBTB20;RAB11B;SMAD2;PTPRN2;EFNA5					protein autophosphorylation	18	0.00817177	EPHB1;ABL2;MAP3K9;ULK2;CAV1;UHMK1;PTK6;VEGFA;ERRFI1;OXSR1;DDR1;STK4;EEF2K;CAMK2A;STK11;SYK;TAOK1;WNK3	negative regulation of cell-cell adhesion mediated by cadherin	1	0.0396208	PPM1F	protein serine/threonine kinase activator activity	3	0.0255153	DBF4;CAB39;STK4	NADP binding	3	0.0233728	H6PD;MTHFR;NDOR1
positive regulation of nucleobase-containing compound metabolic process	31	0.0132288	HMGB1;HNF4A;MET;RFX3;MYOCD;CELF4;REST;KPNA6;RPS6KA5;PPP1R12A;LEF1;SMAD4;MYCN;PHF19;ATXN7L3;POU2F1;ZBTB20;PLAGL2;TNRC6B;SATB2;SMAD2;ELK1;MNT;BTG2;HEYL;PIK3R2;NFIC;CNOT6L;TNRC6A;TP53INP2;USP7					branching involved in blood vessel morphogenesis	5	0.00826442	VEGFA;LEF1;SRF;STK4;PLXND1	positive regulation of oxidative stress-induced intrinsic apoptotic signaling pathway	1	0.0396208	MCL1	intrinsic component of endoplasmic reticulum membrane	8	0.0255496	G6PC;SLC35B4;ELOVL5;EMC8;TEX261;SCD;SGPL1;SAMD8	protein autophosphorylation	7	0.0234585	CAV1;TAOK1;STK4;MINK1;FER;EPHA4;IGF1R
positive regulation of protein modification process	22	0.013276	HMGB1;CAV1;MET;BCL2;IL6R;RPS6KA5;PPP1R12A;SMAD4;PHF19;AKAP13;IGFBP4;GNG3;MAPKAPK2;DIRAS2;CCL22;MAP4K2;STK11;SYK;EFNA5;SDC4;SRCIN1;PEA15					very long-chain fatty acid metabolic process	5	0.00826442	HACD3;HACD4;HACD2;PEX2;ACOX1	negative regulation of smoothened signaling pathway involved in dorsal/ventral neural tube patterning	1	0.0396208	TRAF3IP1	amino acid transmembrane transporter activity	5	0.0258663	SLC1A5;SLC16A10;SLC38A2;SLC7A1;SLC38A4	cell proliferation	35	0.0235495	HMGB1;SOD2;CAV1;CDKN1A;IRAK4;REST;ESR1;AGO3;STK4;AR;CD3E;ETV3;FXN;ETS1;CD151;SNAI2;SKI;LIMS1;BID;FER;INSIG1;NTRK3;HMGA2;IL6R;GLUL;BTG1;RREB1;HOOK3;ZFP36L2;FRS2;PRKAA1;CNOT6L;TOB2;SOX2;IGF1R
regulation of insulin secretion	6	0.0133114	IRS1;HNF4A;RFX3;REST;SYT7;EFNA5					negative regulation of proteolysis involved in cellular protein catabolic process	8	0.0082726	CSNK2A1;SMARCC1;PML;SUFU;YOD1;UBE2G2;PSMF1;USP14	transmembrane receptor protein tyrosine phosphatase signaling pathway	1	0.0396208	FRS2	positive regulation of leukocyte mediated immunity	7	0.0259076	MAVS;PVR;CD1D;F2RL1;BTK;GATA2;RIF1	regulation of apoptotic signaling pathway	10	0.0235751	SOD2;CAV1;STK4;AR;GRINA;FXN;SNAI2;BID;SKIL;CASP2
cellular response to cholesterol	2	0.0133254	GRAMD1B;HMGCS1					phagocytic vesicle membrane	8	0.0082726	CYBB;RAB7A;CALR;RAB11B;RAB10;RAB11FIP1;RAB43;VAMP8	mRNA 3'-splice site recognition	1	0.0396208	SF3A3	neuron to neuron synapse	14	0.0259443	DCC;NLGN4X;BMPR2;EEF2K;GRIN2B;SHISA9;EFNB2;CACNG7;CTNND1;MPP2;ADD2;NLGN2;NETO2;MAPK1	negative regulation of neurogenesis	8	0.0241432	REST;DDX6;RAP1GAP2;SKI;NTRK3;HOOK3;EPHA4;SOX2
lymphangiogenesis	2	0.0133254	VASH1;PTPN14					negative regulation of developmental process	54	0.0084001	EPHB1;DDX6;ULK2;MYLIP;HMGB1;CAV1;CDKN1A;GPR37L1;THBS2;MYOCD;PML;SUFU;CDK6;REST;CDKN1B;LEF1;SMAD4;KLF13;RARA;WNT3;PAX2;TOB2;CALR;NTN1;RORA;FGF9;MDM2;NPR1;ADCY6;SPRED1;WWC1;STK4;PTPN2;WNT9B;GDI1;EFNA3;MAPK1;STK11;TBXA2R;MED28;PLAC8;FSTL3;TGFBR1;E2F2;ZBTB16;STX1B;PIK3R1;BMPR2;GPR55;SEMA5A;VASH1;EFNA5;NCAPG2;PLXNA3	chromatin silencing at telomere	1	0.0396208	DOT1L	homeostasis of number of cells	11	0.025983	HMGB1;ARNT;BCL2L11;BCL6;ETS1;GPI;GATA2;KLF13;ACVR1B;GPR183;PMAIP1	signal transduction in response to DNA damage	5	0.0245846	CDKN1A;SNAI2;BID;CASP2;CNOT6L
negative regulation of myeloid cell apoptotic process	2	0.0133254	BCL2;CCR5					regulation of vasculature development	23	0.00841196	CDH5;HMGB1;SOD2;CYBB;THBS2;MYOCD;VEGFA;PML;AGO2;CCL11;PLCG1;FGF9;NPR1;SPRED1;RAP1A;EFNA3;TBXA2R;E2F2;HIF1AN;ADM2;SEMA5A;VASH1;PLXND1	Bcl-2 family protein complex	1	0.0396208	MCL1	plasma membrane receptor complex	9	0.0260703	IRS1;IL10RB;IL6R;GRIN2B;SHISA9;CACNG7;TGFBR1;ACVR1B;NPNT	response to hydrogen peroxide	5	0.0245846	MAPK13;FXN;ETS1;COL1A1;PRKAA1
aldehyde biosynthetic process	2	0.0133254	REST;PDXK					ventricular septum morphogenesis	6	0.0084501	NSD2;SMAD4;PROX1;HEYL;TGFBR1;BMPR2	presynaptic endocytic zone	1	0.0396208	FCHO2	regulation of nucleotide metabolic process	6	0.0261669	PDK1;ARNT;PDP2;PFKFB3;ENTPD5;PFKFB2	single-stranded RNA binding	4	0.0246332	HMGB1;TLR7;AGO3;AGO2
regulation of tolerance induction	2	0.0133254	HMGB1;IL2RA					sulfur amino acid metabolic process	6	0.0084501	MTAP;MAT1A;MRI1;MTHFR;MTHFD1;AHCY	Elongator holoenzyme complex	1	0.0396208	ELP2	T cell activation involved in immune response	6	0.0261669	MYB;HMGB1;RAB27A;F2RL1;BCL6;GPR183	phosphatase regulator activity	4	0.0246332	MGAT5;PPP1R1A;ARPP19;FRS2
CCR4-NOT complex	2	0.0133254	CNOT4;CNOT6L					positive regulation of glucose transmembrane transport	6	0.0084501	MAPK14;ARPP19;RAP1A;OSBPL8;AKT2;PIK3R1	lipase binding	1	0.0396208	LRPAP1	immunoglobulin production	6	0.0261669	POU2F2;TMIGD2;BTK;BCL6;GPI;RIF1	positive regulation of cell-matrix adhesion	3	0.0246407	CD3E;LIMS1;PPM1F
response to oxygen levels	9	0.0133604	CAV1;BCL2;MYOCD;REST;SMAD4;MDM4;LDHA;STC2;MTHFR					regulation of cell-matrix adhesion	11	0.00846855	PLEKHA2;UTRN;VEGFA;CDK6;SDC4;DDR1;FMN1;LIMS1;BCAS3;PIK3R1;EFNA5	steroid hormone binding	1	0.0396208	NR3C1	forebrain development	15	0.0265166	HOOK3;CRK;SEMA5A;FGFR1;KDM2B;SLC38A2;EZH1;ETS1;GSK3B;BTG2;GATA2;TYRO3;SOCS7;RAN;NFIB	bicellular tight junction assembly	3	0.0246407	MTDH;SNAI2;OCLN
leukocyte proliferation	8	0.0135576	HMGB1;BCL2;IL6R;LEF1;SYK;SDC4;SPN;IL2RA					regulation of protein serine/threonine kinase activity	33	0.00849003	CCND2;MAP3K9;HACD3;CAV1;CDKN1A;MAPK14;PAK3;MYOCD;VEGFA;CDKN1B;CCNE2;DUSP9;SESN2;GNG3;PROX1;MAPKAPK2;SPRED1;STK4;DIRAS2;SYAP1;MAPK1;UBE2N;MAP4K2;MAPK8IP3;S1PR2;SYK;TGFBR1;CCNT1;PRKAR2A;SAMD5;TAOK1;CAB39;DUSP14	neurotrophin TRK receptor binding	1	0.0396208	FRS2	negative regulation of apoptotic process	30	0.0265994	RPS6KA3;DFFA;FXN;HYPK;XRCC2;EEF2K;BMP7;SEMA5A;DSTYK;FGFR1;KDM2B;VHL;BCL6;PEA15;GPI;GSK3B;EN2;CBL;TMBIM4;BTG2;GNAI2;GATA2;TGFBR1;BHLHB9;MTRNR2L1;TYRO3;BNIP2;WDR73;WNK3;PIM3	body morphogenesis	3	0.0246407	CRISPLD2;SKI;COL1A1
enzyme activator activity	12	0.013566	OPHN1;HMGB1;CAV1;GMFB;ERRFI1;PSME3;GDI1;PIK3R2;STK11;RABGAP1L;EFNA5;BCL2L13					posttranscriptional gene silencing by RNA	10	0.00849021	ESR1;FXR1;MYCN;AGO2;CELF1;TP53;POLR2E;XPO5;LIN28B;DROSHA	neurotrophin TRKA receptor binding	1	0.0396208	FRS2	regulation of cell growth	16	0.0268433	DCC;RPS6KA3;FXN;BMPR2;SEMA3E;SEMA5A;KDM2B;CACNG7;BCL6;LIMK1;FAM107A;GSK3B;TGFBR1;RAB33B;ACVR1B;LAMTOR1	cell motility	28	0.0248648	OPHN1;MGAT5;HMGB1;SOD2;CAV1;IRAK4;MINK1;AGO2;ETS1;CD151;SNAI2;SKI;FER;NTRK3;SDC3;SOCS7;PADI2;PPIA;IL6R;GLUL;BTG1;RREB1;COL1A1;PPM1F;JMY;EPHA4;C5orf30;IGF1R
negative regulation of striated muscle tissue development	3	0.0136456	MYOCD;LEF1;SMAD4					mitotic DNA damage checkpoint	10	0.00849021	CDKN1A;PML;CDKN1B;MDM4;BTG2;CNOT6L;MDM2;TFDP2;TP53;TAOK1	histone serine kinase activity	1	0.0396208	PRKAA1	polysaccharide biosynthetic process	5	0.0272385	IRS1;B3GNT2;GSK3B;PPP1R3B;PGM2L1	localization of cell	28	0.0248648	OPHN1;MGAT5;HMGB1;SOD2;CAV1;IRAK4;MINK1;AGO2;ETS1;CD151;SNAI2;SKI;FER;NTRK3;SDC3;SOCS7;PADI2;PPIA;IL6R;GLUL;BTG1;RREB1;COL1A1;PPM1F;JMY;EPHA4;C5orf30;IGF1R
intrinsic component of organelle membrane	7	0.0137192	AGK;SLC6A17;PEX11B;RAB11B;RAB5B;PTPRN2;STX6					columnar/cuboidal epithelial cell development	7	0.00865513	CDKN1A;TRIOBP;RFX3;CDK6;RARA;GPAT4;YIPF6	Prednisolone	1	0.0396208	NR3C1	fatty acid derivative metabolic process	8	0.0273199	ACSL6;ELOVL5;PTGS1;GGT5;PTGES2;ZADH2;ACOX1;SCD	regulation of morphogenesis of an epithelium	5	0.0253013	ESR1;WNT9B;AR;SNAI2;RREB1
negative regulation of transport	11	0.0137499	IRS1;HMGB1;CAV1;PPP1R11;BCL2;GRM7;REST;PRRT2;GDI1;SRCIN1;PEA15					regulation of growth	42	0.00865863	CSNK2A1;ULK2;RAB21;CDKN1A;GJA1;MAPK14;OPA3;CREB1;PTK6;MYOCD;VEGFA;PML;CDKN1B;LEF1;SMAD4;DPYSL2;RPS6KA3;DDR1;IGFBP4;WNT3;SESN2;NTN1;PROX1;EI24;FGF9;NPR1;BASP1;SRF;WWC1;STK4;GDI1;STK11;MCTS1;PLAC8;TP53;TGFBR1;BMPR2;SEMA5A;KDM2B;EFNA5;PLXNA3;GPAT4	Fluoxymesterone	1	0.0396208	NR3C1	positive regulation of cell growth	8	0.0273199	RPS6KA3;FXN;BMPR2;SEMA5A;KDM2B;CACNG7;LIMK1;TGFBR1	toll-like receptor signaling pathway	5	0.0253013	HMGB1;CAV1;TLR7;IRAK4;ESR1
positive regulation of viral process	4	0.013783	PPIA;LEF1;VPS37B;LARP1					lipid metabolic process	78	0.00870473	PLCXD3;PLEKHA2;UGCG;CYP27C1;HACD3;TMEM86A;ALG9;CAV1;SPTLC3;ESR1;BSCL2;ALDH5A1;DKK3;MAPK14;OPA3;A4GALT;PITPNM3;PDK3;CREB1;LIPG;GRB2;STARD7;REST;AGK;PTGES2;VAV3;RAB7A;PLAGL2;SDC4;PCYT1A;NRG4;PDPR;SOAT1;SESN2;HDLBP;PROX1;PRLR;PLCG1;RORA;FGF9;PIK3C2B;PRKAB1;GM2A;OSBPL8;ALG1;PIGX;FADS6;ST3GAL2;HACD4;LPCAT3;AGMO;LRAT;HACD2;AKT2;GK5;PEX2;CNBP;KDSR;ACACA;ABHD2;GDE1;GGPS1;PNPLA3;PIK3R1;CERS1;PLCXD2;ACOX1;…	Tetrafluoroaluminate Ion	1	0.0396208	GNAI1	HIF-1 signaling pathway	6	0.027321	PDK1;ARNT;IL6R;VHL;PFKFB3;MAPK1	pattern recognition receptor signaling pathway	6	0.0253571	HMGB1;CAV1;TLR7;IRAK4;ESR1;TMEM189-UBE2V1
whole membrane	28	0.0138499	IRS1;CAV1;MFSD8;TPCN2;BCL2;COPZ1;MOAP1;AGK;VPS37B;SYT7;ANTXR2;SLC6A17;PEX11B;RPH3A;RAB11B;RAB5B;PTPRN2;SLC48A1;PRRT2;NFASC;TSPAN14;RAB11FIP4;PAG1;MIEF1;MLEC;EFNA5;STX6;SDC4					regulation of translation	24	0.0087468	YTHDF1;SAMD4A;UHMK1;TRUB2;CELF4;CASC3;IGF2BP1;EIF4H;FXR1;RPS6KA3;RARA;AGO2;BTG2;CNOT6L;SESN2;CALR;CAPRIN1;UNK;ITGA2;CELF1;MAPK1;AKT2;METTL14;LARP1	ZEN-012	1	0.0396208	TUBB	regulation of protein binding	10	0.0273948	TIRAP;CRK;SYAP1;CFHR5;GSK3B;FKBP1A;ADD2;TGFBR1;STK4;RAN	roof of mouth development	4	0.0255473	WNT9B;SNAI2;SKI;INSIG1
regulation of secretion by cell	15	0.0138917	IRS1;HMGB1;PPIA;HNF4A;PPP1R11;GRM7;RFX3;REST;SMAD4;SYT7;SYK;EFNA5;SDC4;SRCIN1;GSK3B					signal transduction by protein phosphorylation	54	0.00875648	EPHB1;PABPN1;MAP3K9;CCR5;IL5;HACD3;HMGB1;CAV1;DSTYK;MAPK14;PAK3;GPR37L1;VEGFA;ERRFI1;GRB2;NDST1;OXSR1;SMAD4;KLHDC10;DDR1;IGFBP4;NRG4;DUSP9;NEK4;GNG3;SH3RF1;CCL11;GRIN2B;RASGRF1;FGF9;MAPKAPK2;CAMK2G;DHX33;SPRED1;RAP1A;WWC1;STK4;DIRAS2;PTPN2;CCL22;MAPK1;IL2RA;UBE2N;MAP4K2;CAMK2A;MAPK8IP3;S1PR2;SYK;TGFBR1;GPR55;SAMD5;TAOK1;CAB39;DUSP14	Gestrinone	1	0.0396208	NR3C1	positive regulation of innate immune response	13	0.0274683	HMGB1;RPS6KA3;MAVS;TSPAN6;TIRAP;PVR;CD1D;IRAK4;F2RL1;BTK;IKBKG;LILRA2;TYRO3	response to vitamin	4	0.0255473	MTHFR;DNMT3B;SNAI2;COL1A1
cell morphogenesis involved in differentiation	15	0.0138917	OPHN1;MET;BCL2;LAMC1;RPS6KA5;LEF1;SMAD4;SEMA4G;GDI1;NFASC;STK11;CABP4;EFNA5;SRCIN1;GSK3B					respiratory system development	16	0.00884965	HMGB1;CREB1;MYOCD;VEGFA;PGR;ERRFI1;LEF1;RARA;PROX1;FGF9;BASP1;SRF;ITGA3;MAPK1;FSTL3;BMPR2	phosphatidylinositol phosphorylation	3	0.03971	PIK3R2;PIKFYVE;FRS2	membrane raft	13	0.0274683	IRS1;BMPR2;PIKFYVE;CRK;PRKAR2A;HPSE;BTK;CBL;ADD2;GNAI2;TGFBR1;LAMTOR1;MAPK1	Longevity regulating pathway	4	0.0255473	SOD2;SESN3;PRKAA1;IGF1R
positive regulation of lymphocyte proliferation	5	0.0142452	HMGB1;BCL2;IL6R;SYK;IL2RA					positive regulation of nucleic acid-templated transcription	87	0.0088562	SPIB;KPNA6;CREBRF;IL5;PHF19;HMGB1;MICAL2;ESR1;GABPB1;MAPK14;MACC1;CRTC1;CREB1;SMARCC1;RFX3;MYOCD;VEGFA;E2F5;PGR;PML;REST;PTGES2;RPS6KA5;PPP1R12A;LEF1;SMAD4;SSBP2;MYCN;RPS6KA3;PLAGL2;KLF13;RARA;ATXN7L3;PAX2;AGO2;NEK4;SESN2;NRF1;PROX1;RORA;S1PR1;DHX33;SRF;DVL1;ZNF268;MNT;WWC1;SENP2;KAT7;TARDBP;ELK1;TFDP2;MAFF;PKNOX1;MAPK1;ZNF485;GMEB1;MYCBP;HEYL;MLXIP;CREB3L2;RPS6KA4;FOSL1;GTF2F1;ACVR2A;IKZF3;BCAS3…	Leukocyte transendothelial migration	3	0.03971	PIK3R2;GNAI1;RHOA	regulation of protein dephosphorylation	7	0.0279207	ENSA;GSK3B;FKBP1A;PPP1R3B;GNAI2;PPP1R26;PPP1R14C	negative regulation of potassium ion transmembrane transporter activity	2	0.0255518	CAB39;CAV1
regulation of protein dephosphorylation	5	0.0142452	PPP1R1A;PPP1R11;PPP1R12A;ARPP19;GSK3B					artery development	9	0.0088945	MYOCD;VEGFA;SUFU;NDST1;PROX1;SRF;TGFBR1;BMPR2;PLXND1	protein exit from endoplasmic reticulum	2	0.0397259	INSIG1;SEC16A	Osteoclast differentiation	7	0.0279207	NFATC2;IFNAR1;BTK;IKBKG;TGFBR1;LILRA2;MAPK1	amyloid-beta clearance	2	0.0255518	LRPAP1;IGF1R
protein dimerization activity	23	0.0143212	CAV1;HNF4A;BCL2;IL6R;FXR1;SMAD4;PDXK;MYCN;STC2;PCYT1A;PEX11B;SMC2;ZHX3;SMAD2;ITGA3;MNT;HEYL;PIK3R2;RAB11FIP4;HES2;CBX5;PIP4K2B;HMGCS1					positive regulation of viral process	9	0.0088945	HACD3;PPIA;LEF1;VPS37B;RAB7A;CFL1;PDE12;CCNT1;LARP1	negative regulation of muscle tissue development	2	0.0397259	FRS2;AKIRIN1	regulation of fatty acid oxidation	3	0.0279885	IRS1;LONP2;PLIN5	mitotic G2 DNA damage checkpoint	2	0.0255518	TAOK1;HMGA2
neuron to neuron synapse	9	0.0143294	PALM;GRM7;FXR1;SYT7;GNG3;PRRT2;SHISA9;SRCIN1;FRMPD4					positive regulation of RNA biosynthetic process	87	0.00899606	SPIB;KPNA6;CREBRF;IL5;PHF19;HMGB1;MICAL2;ESR1;GABPB1;MAPK14;MACC1;CRTC1;CREB1;SMARCC1;RFX3;MYOCD;VEGFA;E2F5;PGR;PML;REST;PTGES2;RPS6KA5;PPP1R12A;LEF1;SMAD4;SSBP2;MYCN;RPS6KA3;PLAGL2;KLF13;RARA;ATXN7L3;PAX2;AGO2;NEK4;SESN2;NRF1;PROX1;RORA;S1PR1;DHX33;SRF;DVL1;ZNF268;MNT;WWC1;SENP2;KAT7;TARDBP;ELK1;TFDP2;MAFF;PKNOX1;MAPK1;ZNF485;GMEB1;MYCBP;HEYL;MLXIP;CREB3L2;RPS6KA4;FOSL1;GTF2F1;ACVR2A;IKZF3;BCAS3…	nucleic acid transport	4	0.0399391	SRSF7;NCBP3;RBM8A;QKI	endothelial cell chemotaxis	3	0.0279885	HMGB1;SEMA5A;FGFR1	regulation of bicellular tight junction assembly	2	0.0255518	SNAI2;OCLN
cellular response to alcohol	4	0.0143494	LARP1;EFNA5;GRAMD1B;HMGCS1					mesoderm morphogenesis	8	0.00901688	LEF1;WNT3;PAX2;CRB2;SRF;ITGA2;ITGA3;BMPR2	RNA transport	4	0.0399391	SRSF7;NCBP3;RBM8A;QKI	histone demethylase activity	3	0.0279885	KDM5A;KDM2B;ARID5B	maturation of LSU-rRNA	2	0.0255518	SNU13;RPF2
regulation of protein localization to membrane	6	0.0143772	BCL2;IQSEC2;ITGA3;GDI1;MIEF1;TCAF1					ventricular septum development	8	0.00901688	SUFU;NSD2;SMAD4;PROX1;MDM2;HEYL;TGFBR1;BMPR2	purine ribonucleoside binding	6	0.0400754	ARL3;ARF1;GNAI1;RHOA;ARL10;TUBB	membrane microdomain	13	0.0280927	IRS1;BMPR2;PIKFYVE;CRK;PRKAR2A;HPSE;BTK;CBL;ADD2;GNAI2;TGFBR1;LAMTOR1;MAPK1	regulation of protein complex assembly	11	0.025603	HMGB1;ESR1;GTF2H1;BID;FER;INSIG1;JMY;DDB1;PRKAA1;CNOT6L;TRAF3IP1
positive regulation of epithelial to mesenchymal transition	3	0.0144803	LEF1;SMAD4;SMAD2					Renal cell carcinoma	8	0.00901688	CDKN1A;PAK3;VEGFA;GRB2;RAP1A;MAPK1;AKT2;PIK3R1	mitochondrial part	12	0.0402178	STAR;AK2;MMAB;NR3C1;MRPS18B;MCL1;ULK1;CYCS;TXNIP;MRPS21;COX10;EPHA4	cell killing	8	0.0282362	RAB27A;PVR;CRK;CD1D;APOL1;F2RL1;BCL2L11;CLEC12B	tight junction assembly	3	0.0259452	MTDH;SNAI2;OCLN
glycogen biosynthetic process	3	0.0144803	IRS1;PHKG2;GSK3B					posttranscriptional gene silencing	10	0.00910405	ESR1;FXR1;MYCN;AGO2;CELF1;TP53;POLR2E;XPO5;LIN28B;DROSHA	peptide transport	20	0.0405415	TNPO1;FFAR4;ZDHHC18;PIK3R2;VPS13D;MCL1;ARF1;SRSF7;TXNIP;PTPN14;ATG13;INSIG1;KCNB1;RBM8A;HOOK3;COL1A1;PPM1F;SEC16A;PRKAA1;C5orf30	positive regulation of protein phosphorylation	32	0.0284523	MAP3K2;HMGB1;MAVS;CDK9;BMPR2;TIRAP;BMP7;CRK;DBF4;SYAP1;IL6R;F2RL1;DSTYK;ATG14;PRKAR2A;FGFR1;SAMD5;PEA15;IKBKG;GPRC5A;GNAI2;TGFBR1;CAB39;MAP3K9;STK4;TYRO3;ACVR1B;GPR183;LAMTOR1;WNK3;MAPK1;NPNT	positive regulation of chemokine production	3	0.0259452	HMGB1;TLR7;IL6R
glucan biosynthetic process	3	0.0144803	IRS1;PHKG2;GSK3B					regulation of protein localization to membrane	15	0.00911572	YWHAZ;CRIPT;IQSEC2;BBC3;RAP1A;ITGA3;TFDP2;AP2M1;GDI1;AKT2;TP53;PIK3R1;MIEF1;WNK3;VAMP8	protein-containing complex localization	5	0.0406414	TNPO1;ARL3;SRSF7;RBM8A;TRAF3IP1	cell morphogenesis	32	0.0284523	DCC;B3GNT2;BMPR2;NYAP2;CABP4;EEF2K;BMP7;LIMS1;CRK;SEMA3E;ZNF135;SEMA5A;VHL;EFNB2;CACNG7;BCL6;LIMK1;GSK3B;SDC2;CDC42SE1;BHLHB9;RILPL1;COL4A3BP;NFASC;ZMYM1;STK4;TYRO3;FMNL2;PITPNA;NFIB;MAPK1;CLIC4	postreplication repair	3	0.0259452	POLD3;TMEM189-UBE2V1;SPRTN
negative regulation of muscle organ development	3	0.0144803	MYOCD;LEF1;SMAD4					homeostasis of number of cells	19	0.00921247	HMGB1;MAPK14;VEGFA;CDK6;ADD1;KLF13;RPS24;SRF;FAM210B;FANCC;PTPN2;PKNOX1;IL2RA;TNFSF14;ACVR2A;SLC11A2;MTHFD1;BAK1;NCAPG2	dsRNA processing	2	0.0412748	AGO1;NCOR2	organophosphate ester transport	6	0.0285083	G6PC;SLC35B4;LDLR;TMEM30B;COL4A3BP;PITPNA	peptidyl-serine phosphorylation	8	0.0259993	CAB39;CAV1;STK4;MAPK13;NTRK3;HMGA2;PPM1F;PRKAA1
T cell differentiation	7	0.0146502	HMGB1;BCL2;LEF1;STK11;SYK;SPN;IL2RA					molecular adaptor activity	16	0.00927587	SHB;SH2B3;GATAD2A;CAV1;CBX5;ABI2;SKAP2;GRB2;VAV3;LASP1;SH3RF1;AP2M1;OPTN;ANK1;MAPK8IP3;PIK3R1	production of small RNA involved in gene silencing by RNA	2	0.0412748	AGO1;NCOR2	negative regulation of developmental growth	6	0.0285083	DCC;FXN;NKD1;SEMA3E;SEMA5A;STK4	protein serine/threonine kinase activity	11	0.026338	CAB39;CDKN1A;IRAK4;TAOK1;STK4;PRPF4B;MINK1;MAPK13;GTF2H1;GRK3;PRKAA1
positive regulation of mononuclear cell proliferation	5	0.0146897	HMGB1;BCL2;IL6R;SYK;IL2RA					tumor necrosis factor biosynthetic process	4	0.00929442	CYBB;ERRFI1;MAPKAPK2;SPN	selective autophagy	2	0.0412748	VPS13D;ATG13	virus receptor activity	5	0.0286562	PVR;SLC1A5;LDLR;EFNB2;TYRO3	positive regulation of peptidase activity	6	0.0265879	HMGB1;CAV1;REST;BID;PPM1F;EPHA4
regulation of RNA stability	5	0.0146897	FXR1;MAPKAPK2;SYNCRIP;LARP1;CNOT6L					regulation of tumor necrosis factor biosynthetic process	4	0.00929442	CYBB;ERRFI1;MAPKAPK2;SPN	purine nucleoside binding	6	0.0413991	ARL3;ARF1;GNAI1;RHOA;ARL10;TUBB	hijacked molecular function	5	0.0286562	PVR;SLC1A5;LDLR;EFNB2;TYRO3	sarcolemma	5	0.0267747	SLC38A2;CACNG8;CAV1;KCNB1;ABCC9
regulation of peptide secretion	11	0.0147957	IRS1;HMGB1;PPIA;HNF4A;PPP1R11;RFX3;REST;SYT7;SYK;EFNA5;SRCIN1					entrainment of circadian clock by photoperiod	4	0.00929442	CRTC1;PML;BHLHE40;TP53	positive regulation of mitochondrion organization	3	0.0414985	VPS13D;ATG13;PRKAA1	regulation of lipid catabolic process	4	0.0290309	IRS1;LONP2;PLIN5;LDLR	morphogenesis of a branching epithelium	6	0.027218	ESR1;STK4;WNT9B;AR;SNAI2;FRS2
regulation of leukocyte cell-cell adhesion	8	0.0149314	HMGB1;CAV1;IL6R;SYK;PAG1;SDC4;SPN;IL2RA					ribonucleoprotein complex binding	12	0.0093064	YTHDF1;CBX5;UHMK1;EIF4H;MRRF;LETMD1;MDM2;DHX33;UNK;OLA1;SNRPD3;LETM2	peptidyl-serine phosphorylation	5	0.0416903	FNIP1;ULK1;NTRK3;PPM1F;PRKAA1	positive regulation of chemokine production	4	0.0290309	HMGB1;MAVS;TIRAP;IL6R	sulfur compound biosynthetic process	6	0.027218	ACACA;MTHFR;PRELP;VCAN;GLCE;AMD1
regulation of intracellular protein transport	7	0.0149704	GDI1;PIK3R2;MIEF1;PTPN14;TCAF1;XPO4;GSK3B					anterior/posterior pattern specification	17	0.0093328	EMX2;LEF1;SMAD4;WNT3;BTG2;CRB2;BASP1;BHLHE40;SRF;HES2;HOXC8;ACVR2A;XRCC2;TGFBR1;ZBTB16;BMPR2;KDM2B	ribonucleoside binding	6	0.0418465	ARL3;ARF1;GNAI1;RHOA;ARL10;TUBB	interferon-beta production	4	0.0290309	HMGB1;MAVS;TIRAP;REL	response to growth factor	15	0.0273917	RNF165;FAM83G;CAV1;SNAI2;FSTL3;SKI;LIMS1;FER;SKIL;NTRK3;RNF111;COL1A1;ZFP36L2;FRS2;SOX2
response to follicle-stimulating hormone	2	0.0149926	EFNA5;HMGCS1					leukocyte activation involved in immune response	43	0.00942023	SURF4;CD55;HMGB1;VAMP2;NFAM1;MAPK14;CYBB;PPIA;SIGLEC14;NSD2;PTGES2;LEF1;PDXK;RAB7A;RARA;RAB5C;RORA;RAB5B;PKP1;GM2A;RAP1A;ADA2;MAGT1;FLG2;MAPK1;NFASC;RAB10;COMMD9;TSPAN14;PLAC8;SYK;QSOX1;HPSE;PGAM1;CD84;IL23R;MLEC;SPN;METTL7A;CD68;CAB39;VAMP8;PAFAH1B2	establishment of RNA localization	4	0.0418938	SRSF7;NCBP3;RBM8A;QKI	transforming growth factor beta receptor binding	4	0.0290309	USP15;BMP7;FKBP1A;TGFBR1	cell junction organization	8	0.0274552	OPHN1;CAV1;MTDH;CD151;SNAI2;LIMS1;PPM1F;OCLN
negative regulation of anoikis	2	0.0149926	CAV1;BCL2					regulation of leukocyte differentiation	20	0.00943203	IL5;HMGB1;NFAM1;CREB1;CDK6;LEF1;RARA;TOB2;SH3RF1;PTPN2;IL2RA;IKZF3;FSTL3;SYK;ZBTB16;FANCA;PIK3R1;GPR55;IL23R;DROSHA	phospholipid biosynthetic process	5	0.0422209	PIK3R2;ARF1;PIKFYVE;PLA2G12A;FRS2	purine-containing compound metabolic process	20	0.0292508	PDK1;FXN;PANK2;G6PC;ARNT;PDP2;THEM4;DHTKD1;CYCS;PANK3;ACSL6;ELOVL5;GPI;PFKFB3;HMGCS1;ENTPD5;PGM2L1;SCD;RAN;PFKFB2	regulation of peptidyl-serine phosphorylation	5	0.0275314	CAV1;STK4;NTRK3;PPM1F;PRKAA1
paraxial mesoderm development	2	0.0149926	LEF1;SMAD2					negative regulation of mRNA catabolic process	6	0.00947397	MAPK14;IGF2BP1;PKP1;MAPKAPK2;TARDBP;LARP1	ribonucleoside triphosphate metabolic process	5	0.0422209	AK2;CYCS;RHOA;COX10;PRKAA1	leukocyte activation involved in immune response	24	0.0294414	MYB;HMGB1;RAB27A;KCMF1;F2RL1;HPSE;TSPAN14;BTK;BCL6;GPI;PTGES2;EEF1A1;CBL;QSOX1;GATA2;CAB39;RIF1;LILRA2;NFASC;GPR183;LAMTOR1;RAB5B;MAPK1;CYB5R3	regulation of cellular component movement	19	0.0278824	MGAT5;HMGB1;SOD2;CAV1;MINK1;AGO2;ETS1;CD151;SNAI2;FER;NTRK3;PADI2;IL6R;GLUL;RREB1;COL1A1;PPM1F;C5orf30;IGF1R
interleukin-6-mediated signaling pathway	2	0.0149926	IL6R;SMAD4					protein serine/threonine/tyrosine kinase activity	6	0.00947397	MAP3K9;DSTYK;MAPK14;PAK3;DYRK2;MAPK1	myeloid cell differentiation	6	0.0427503	TRIM58;TNRC6B;TNRC6C;TAL1;AGO1;IREB2	negative regulation of growth	11	0.0295194	DCC;PNPT1;FXN;BMPR2;TIRAP;NKD1;SEMA3E;SEMA5A;BCL6;STK4;ACVR1B	nucleotide-excision repair, preincision complex stabilization	2	0.0280121	GTF2H1;DDB1
filopodium membrane	2	0.0149926	PALM;ITGA3					positive regulation of adherens junction organization	5	0.00951437	VEGFA;ADD1;SDC4;FMN1;LIMS1	actin nucleation	2	0.0428462	ARF1;JMY	sequence-specific DNA binding	35	0.0296031	MYB;ELK4;CREBRF;CDK9;IKZF3;HOXB5;HES2;SOX7;KDM5A;SMG1;NFATC2;CTCFL;ARNT;POU2F2;GATAD1;ZBED1;GMEB1;HEYL;KDM2B;MLXIP;REL;POU2F1;TERF1;BCL6;ETS1;ARID5B;EN2;HOXC13;GATA2;KLF13;HOXC8;HMBOX1;NFIB;KLF6;NR2C2	cytoplasmic mRNA processing body assembly	2	0.0280121	DDX6;CNOT6L
mitotic cell cycle process	16	0.0150879	POGZ;CNOT4;BCL2;CDK6;FOXN3;CCNE2;MDM4;ARPP19;RTKN;SMC2;TUBGCP3;PSME3;BTG2;CEP97;CNOT6L;NEK9					positive regulation of BMP signaling pathway	5	0.00951437	RNF165;SMAD4;FKBP8;CRB2;BMPR2	trabecula morphogenesis	2	0.0428462	RHOA;COL1A1	cardiac neural crest cell differentiation involved in heart development	2	0.0296256	BMP7;MAPK1	phosphatidylserine acyl-chain remodeling	2	0.0280121	LPCAT3;PLA2G12A
epithelial to mesenchymal transition	5	0.0151434	LEF1;SMAD4;SMAD2;HEYL;GSK3B					mRNA splice site selection	5	0.00951437	LUC7L2;CELF4;SRSF10;CELF1;SF3A1	nuclear envelope organization	2	0.0428462	TMEM170A;TMEM43	cardiac neural crest cell development involved in heart development	2	0.0296256	BMP7;MAPK1	Estrone	2	0.0280121	ESR1;AR
protein insertion into membrane	3	0.0153434	BCL2;MOAP1;UBL4A					Circadian rhythm	5	0.00951437	CREB1;RORA;PRKAB1;BHLHE40;CSNK1E	response to growth factor	9	0.0429454	STAR;NR3C1;RHOA;SKIL;NTRK3;COL1A1;ZFP36L2;FRS2;IREB2	positive regulation of killing of cells of other organism	2	0.0296256	F2RL1;BCL2L11	locomotion	31	0.0281072	OPHN1;MGAT5;RNF165;HMGB1;SOD2;CAV1;IRAK4;MINK1;AGO2;ETS1;CD151;SNAI2;SKI;FER;NTRK3;SDC3;SOCS7;PADI2;PPIA;IL6R;GLUL;BTG1;RREB1;COL1A1;PPM1F;JMY;DDB1;EPHA4;FRS2;C5orf30;IGF1R
negative regulation of muscle tissue development	3	0.0153434	MYOCD;LEF1;SMAD4					regulation of BMP signaling pathway	9	0.00959546	RNF165;SMAD4;FKBP8;CRB2;XIAP;ITGA3;ACVR2A;FSTL3;BMPR2	glial cell differentiation	4	0.0432267	TAL1;RHOA;NTRK3;EPHA4	quaternary ammonium group transport	2	0.0296256	SLC25A45;SLC38A2	cell junction	24	0.0281865	OPHN1;RAB21;GRID1;CACNG8;SAMD4A;CAV1;SHISA9;CD3E;DDX6;MINK1;AGO2;SYT7;MTDH;CD151;LIMS1;FER;PIKFYVE;SLC4A2;PPIA;KCNB1;EPHA4;FRS2;OCLN;SV2C
PcG protein complex	3	0.0153434	PHF19;CBX2;CBX6					regulation of myeloid leukocyte differentiation	11	0.00962192	IL5;CREB1;CDK6;LEF1;RARA;TOB2;PTPN2;FSTL3;PIK3R1;GPR55;IL23R	purine ribonucleoside monophosphate metabolic process	5	0.0432942	AK2;CYCS;RHOA;COX10;PRKAA1	positive regulation of triglyceride biosynthetic process	2	0.0296256	PLIN5;LDLR	phosphatidylinositol metabolic process	7	0.0282447	PIGO;ESR1;PIP4K2C;PIKFYVE;SOCS7;PLA2G12A;FRS2
Hedgehog signaling pathway	3	0.0153434	GAS1;BCL2;GSK3B					nucleocytoplasmic transport	25	0.00966578	PABPN1;KPNA6;MAPK14;UHMK1;PHAX;NUP43;WDR33;CASC3;PML;SUFU;PPP1R12A;DDX19B;CALR;FGF9;MDM2;TARDBP;RSRC1;MAPK1;SNRPD3;TP53;SYK;FYTTD1;PIK3R1;XPO5;BACH2	purine nucleoside monophosphate metabolic process	5	0.0438371	AK2;CYCS;RHOA;COX10;PRKAA1	positive regulation of protein import into nucleus, translocation	2	0.0296256	MAVS;MAPK1	receptor-mediated endocytosis	8	0.0284567	OPHN1;RAB21;CACNG8;CAV1;PIKFYVE;LRPAP1;GRK3;FCHO2
T cell proliferation	6	0.0155012	HMGB1;IL6R;SYK;SDC4;SPN;IL2RA					regulation of cysteine-type endopeptidase activity	18	0.00971112	CSNK2A1;HMGB1;VEGFA;PML;REST;LEF1;RPS6KA3;PAX2;SH3RF1;GRIN2B;BBC3;MDM2;XIAP;TNFSF14;SOX7;TNFAIP8;BAK1;DHCR24	positive regulation of supramolecular fiber organization	4	0.043902	ARF1;RHOA;PPM1F;JMY	cell-cell junction maintenance	2	0.0296256	F2RL1;NLGN2	steroid hormone receptor activity	3	0.0286632	ESR1;NR2C2;AR
modified amino acid binding	4	0.015526	HMGB1;SYT7;MTHFR;GRAMD1B					response to nutrient levels	32	0.00973847	ULK2;P2RX3;CDKN1A;STC1;CYBB;ATP2B1;CREB1;LIPG;LDHA;RARA;PAX2;SESN2;PROX1;SORD;MDM2;PIK3C2B;SRF;ITGA2;WNT9B;MTHFR;MAPK1;LRAT;TBXA2R;BCAS3;TP53;AHCY;RRAGD;LARP1;BMPR2;SSTR2;FADS1;WIPI2	receptor-mediated endocytosis	5	0.044384	ARF1;PIKFYVE;LRPAP1;GRK3;FCHO2	regulation of nuclear-transcribed mRNA poly(A) tail shortening	2	0.0296256	BTG2;TNRC6B	basal transcription machinery binding	3	0.0286632	ESR1;AR;AGO2
mitotic cell cycle	18	0.0155317	POGZ;CNOT4;GAS1;BCL2;CDK6;FOXN3;PPP1R12A;CCNE2;MDM4;ARPP19;RTKN;SMC2;TUBGCP3;PSME3;BTG2;CEP97;CNOT6L;NEK9					sphingolipid biosynthetic process	10	0.00975128	UGCG;HACD3;SPTLC3;A4GALT;AGK;HACD4;HACD2;KDSR;CERS1;ACER3	regulation of skeletal muscle tissue development	2	0.0444397	PRKAA1;AKIRIN1	positive regulation of nuclear-transcribed mRNA poly(A) tail shortening	2	0.0296256	BTG2;TNRC6B	basal RNA polymerase II transcription machinery binding	3	0.0286632	ESR1;AR;AGO2
cellular response to lipid	13	0.0155728	HMGB1;HNF4A;REST;ERRFI1;LEF1;AKAP13;CCR5;ELK1;LDOC1;HEYL;EFNA5;GRAMD1B;HMGCS1					filopodium	10	0.00975128	EPHB1;PALM;UTRN;ABI2;ACTA1;IGF2BP1;ITGA3;ANTXR1;NPTXR;RAPH1	positive regulation of regulated secretory pathway	2	0.0444397	ARF1;KCNB1	clathrin coat of trans-Golgi network vesicle	2	0.0296256	SYNRG;AP1S1	nucleic acid phosphodiester bond hydrolysis	8	0.0289668	HMGB1;AGO3;POLD3;AGO2;CPSF7;GTF2H1;DDB1;CNOT6L
organophosphate biosynthetic process	14	0.0155748	IRS1;SPTLC2;AGK;PDXK;LDHA;ZBTB20;PITPNM3;PCYT1A;PDPR;SCD;LPCAT3;PIK3R2;PIP4K2B;HMGCS1					AGE-RAGE signaling pathway in diabetic complications	10	0.00975128	MAPK14;CYBB;VEGFA;CDKN1B;SMAD4;PLCG1;MAPK1;AKT2;TGFBR1;PIK3R1	Cholesterol metabolism	2	0.0444397	STAR;LRPAP1	phosphate ion binding	2	0.0296256	G6PC;RPH3A	insulin receptor signaling pathway	5	0.0290855	SESN3;FER;SOCS7;PRKAA1;IGF1R
regulation of tumor necrosis factor production	5	0.0156063	HMGB1;ERRFI1;ZBTB20;MAPKAPK2;SPN					Prolactin signaling pathway	8	0.00981	CCND2;ESR1;MAPK14;GRB2;PRLR;MAPK1;AKT2;PIK3R1	nucleoside binding	6	0.0450636	ARL3;ARF1;GNAI1;RHOA;ARL10;TUBB	dynactin binding	2	0.0296256	HOOK3;GSK3B	regulation of G1/S transition of mitotic cell cycle	5	0.0290855	CTDSPL;CDKN1A;BID;CASP2;CNOT6L
Measles	5	0.0160787	CDK6;CCNE2;PIK3R2;IL2RA;GSK3B					response to forskolin	3	0.00993072	ADCY6;ADCY2;EFNA5	erythrocyte homeostasis	3	0.0451956	TRIM58;TAL1;IREB2	neurexin family protein binding	2	0.0296256	NLGN4X;NLGN2	response to starvation	6	0.0291672	SLC38A2;CDKN1A;WNT9B;SESN3;GLUL;PRKAA1
regulation of actomyosin structure organization	4	0.0161364	MET;SMAD4;AKAP13;SDC4					cellular response to forskolin	3	0.00993072	ADCY6;ADCY2;EFNA5	Sphingolipid signaling pathway	3	0.0451956	PIK3R2;GNAI1;RHOA	oligopeptide binding	2	0.0296256	GSTM3;PTGES2	positive regulation of protein binding	4	0.0294065	CAV1;STK4;GNL3L;EPHA4
protein phosphorylated amino acid binding	3	0.0162349	IRS1;PIK3R2;SYK					gap junction assembly	3	0.00993072	CAV1;GJA1;GJD3	regulation of receptor internalization	2	0.046055	ARF1;LRPAP1	phosphatidylinositol-3,5-bisphosphate 3-phosphatase activity	2	0.0296256	MTMR3;MTMR9	regulation of TOR signaling	4	0.0294065	TNFAIP8L1;CASTOR2;SESN3;PRKAA1
transforming growth factor beta receptor signaling pathway	6	0.0162835	CAV1;MYOCD;SMAD4;SMAD2;ITGA3;STK11					positive regulation of tumor necrosis factor biosynthetic process	3	0.00993072	CYBB;MAPKAPK2;SPN	negative regulation of oxidative phosphorylation	1	0.0460711	RHOA	L-Arginine	2	0.0296256	SLC16A10;SLC7A1	central nervous system development	19	0.0297605	OPHN1;SLC38A2;ADAM22;STK4;WNT9B;CD3E;ETS1;SKI;VCAN;NTRK3;SOCS7;PADI2;MOG;HOOK3;EPHA4;CASP2;FRS2;SEC16A;SOX2
cell junction assembly	7	0.0163009	OPHN1;CAV1;BCL2;LAMC1;NFASC;EFNA5;SDC4					cardiac muscle cell myoblast differentiation	3	0.00993072	MYOCD;REST;SRF	miRNA loading onto RISC involved in gene silencing by miRNA	1	0.0460711	AGO1	unsaturated fatty acid metabolic process	6	0.0297291	ELOVL5;PTGS1;PTGES2;ZADH2;ACOX1;SCD	Transcriptional misregulation in cancer	6	0.0298369	CDKN1A;AFF1;ELK4;REL;HMGA2;IGF1R
phospholipid metabolic process	11	0.0163593	IRS1;SPTLC2;MET;AGK;PITPNM3;PCYT1A;LPCAT3;PIK3R2;SMG1;PIP4K2B;HMGCS1					N-acetylneuraminate metabolic process	3	0.00993072	AMDHD2;GNE;ST3GAL1	motor behavior	1	0.0460711	PRKAA1	leukocyte mediated cytotoxicity	6	0.0297291	RAB27A;PVR;CRK;CD1D;F2RL1;CLEC12B	tight junction organization	3	0.0300767	MTDH;SNAI2;OCLN
negative regulation of multicellular organismal process	21	0.0164115	MYLIP;HMGB1;PPP1R11;BCL2;CDK6;MYOCD;CELF4;REST;ERRFI1;RPS6KA5;LEF1;SMAD4;SEMA4G;STC2;TOB2;DDX6;GDI1;RNF216;STK11;VASH1;GSK3B					UDP-glucosyltransferase activity	3	0.00993072	UGCG;UGGT1;KDELC2	motor neuron apoptotic process	1	0.0460711	KCNB1	regulation of immune effector process	15	0.0299291	MYB;HMGB1;MAVS;TSPAN6;PVR;CRK;CD1D;F2RL1;CFHR5;BTK;BCL6;GPI;GATA2;RIF1;CLEC12B	negative regulation of endocytosis	3	0.0300767	HMGB1;CAV1;LRPAP1
positive regulation of cell differentiation	18	0.0164755	HMGB1;SOD2;BCL2;IL6R;RFX3;MYOCD;REST;LEF1;SMAD4;ZHX3;SMAD2;ITGA3;GDI1;HEYL;STK11;SYK;EFNA5;IL2RA					protein serine/threonine phosphatase inhibitor activity	3	0.00993072	PPP1R1A;PPP1R11;PPP1R14C	regulation of vascular smooth muscle contraction	1	0.0460711	RHOA	ribonucleoside triphosphate biosynthetic process	7	0.0300373	ARNT;DHTKD1;GPI;PFKFB3;ENTPD5;PGM2L1;PFKFB2	negative regulation of G1/S transition of mitotic cell cycle	4	0.0304223	CTDSPL;CDKN1A;CASP2;CNOT6L
tumor necrosis factor production	5	0.0165605	HMGB1;ERRFI1;ZBTB20;MAPKAPK2;SPN					reproductive process	78	0.00993696	DDX6;KPNA6;CREBRF;CLIC5;ESR1;ACTR1A;PAQR7;FBXW8;MAPK14;STC1;STX2;SMARCC1;MYOCD;VEGFA;CELF4;WDR33;PGR;GRB2;EIF4H;CDKN1B;CCNE2;LEF1;SMAD4;ANTXR2;DDR1;RARA;WNT3;CBX2;TOB2;AGO2;CALR;PRLR;SMC2;FGF9;TUBGCP3;BASP1;ITGA2;STK4;CELF1;FANCC;STK35;MCM8;SENP2;WNT9B;ITGA3;TIAL1;RACGAP1;LDOC1;MAFF;FAM9B;MAPK1;MYCBP;FOSL1;SGO1;STK11;ACVR2A;XRCC2;FSTL3;TGFBR1;FEM1B;ZSCAN2;ABHD2;ZBTB16;FANCA;METTL14;ACOX1;BMPR2;SS…	activation of cysteine-type endopeptidase activity involved in apoptotic process by cytochrome c	1	0.0460711	CYCS	positive regulation of chemotaxis	7	0.0300373	HMGB1;BMPR2;TIRAP;IL6R;SEMA5A;F2RL1;FGFR1	peptidyl-amino acid modification	23	0.0305478	CAB39;MGAT5;CAV1;ZBED1;SH3BP5;STK4;SUV39H1;CD3E;JADE2;MAPK13;GNL3L;DNMT3B;SNAI2;FER;NTRK3;PADI2;HMGA2;PPIA;IL6R;PPM1F;EPHA4;PRKAA1;IGF1R
positive regulation of leukocyte proliferation	5	0.0165605	HMGB1;BCL2;IL6R;SYK;IL2RA					sulfur compound metabolic process	25	0.00999417	IBA57;MTAP;MICAL2;ALDH5A1;PDK3;NDST1;UST;MAT2A;PDPR;MAT1A;MRI1;MTHFR;ST3GAL2;CHST6;IDS;ACOT9;ST3GAL1;PRELP;HACD2;MTHFD1;AHCY;ACACA;SLC19A3;PDP2;GPAT4	forebrain radial glial cell differentiation	1	0.0460711	RHOA	Fc-gamma receptor signaling pathway involved in phagocytosis	5	0.0301197	CRK;WIPF3;WIPF2;LIMK1;MAPK1	response to corticosterone	2	0.0305634	CDKN1A;NTRK3
regulation of ossification	6	0.0166847	BCL2;CDK6;IL6R;REST;TOB2;ZHX3					morphogenesis of a branching structure	16	0.0101772	ESR1;VEGFA;PGR;PML;GRB2;LEF1;SMAD4;DDR1;PAX2;CCL11;PROX1;SRF;STK4;WNT9B;FEM1B;PLXND1	Roundabout signaling pathway	1	0.0460711	RHOA	Chronic myeloid leukemia	5	0.0301197	CRK;CBL;IKBKG;TGFBR1;MAPK1	cellular response to prostaglandin stimulus	2	0.0305634	ACACA;PRKAA1
cellular response to low-density lipoprotein particle stimulus	2	0.0167445	SYK;HMGCS1					endoplasmic reticulum unfolded protein response	11	0.0102422	CREBRF;SYVN1;GOSR2;ADD1;CALR;YOD1;PTPN2;CREB3L2;SSR1;PIK3R1;BAK1	cleavage furrow formation	1	0.0460711	RHOA	mitochondrion	47	0.0301553	PDK1;USP15;L2HGDH;PNPT1;FXN;MAVS;PANK2;LIAS;LYRM4;APOPT1;ATAD3C;DBT;TARS2;IBA57;COX20;PDP2;THEM4;DHTKD1;CYCS;GRSF1;PPM1K;QRSL1;MLXIP;SLC25A45;CISD2;SPATA5;VHL;ACSL6;SLC25A16;PLIN5;BCL2L11;EMC8;GSK3B;PTGES2;MIGA2;IDH3A;TRMT10C;CREBZF;COL4A3BP;PMAIP1;MAPK1;TIMM17A;COX19;RMND1;CLIC4;MRPS10;CYB5R3	purine nucleoside biosynthetic process	2	0.0305634	NME6;AMD1
glycogen catabolic process	2	0.0167445	HMGB1;PHKG2					interspecies interaction between organisms	49	0.0102665	DDX6;PABPN1;CD55;CCR5;ULK2;HACD3;CAV1;CBX5;PSMB5;ABI2;CRTC1;PPIA;CREB1;NUP43;PML;GRB2;EIF4H;REST;RTN3;LEF1;VPS37B;RAB7A;FKBP8;CFL1;PROX1;PLCG1;EXOC7;MDM2;PDE12;ITGA2;NFX1;TARDBP;SUV39H1;AP2M1;MAPK1;RNF216;RAB11FIP4;ZC3HAV1;MCTS1;TP53;SYK;CCNT1;PIK3R1;HMGN2;LARP1;POLR2E;ATF7IP;RAB43;VAMP8	ectopic germ cell programmed cell death	1	0.0460711	CASP2	cognition	12	0.0303215	NLGN4X;GPR155;GRIN2B;LDLR;GPI;FAM107A;ATXN1L;AFF2;BTG2;BHLHB9;ATXN1;MAPK1	purine ribonucleoside biosynthetic process	2	0.0305634	NME6;AMD1
response to UV-B	2	0.0167445	BCL2;STK11					regulation of cell development	53	0.0103195	DDX6;CDH5;ABL2;IL5;ULK2;MYLIP;RAB21;FBXW8;PAK3;GPR37L1;CRTC1;TRIOBP;CREB1;PTK6;RFX3;VEGFA;REST;PPP1R12A;SMAD4;UST;ADD1;DPYSL2;RARA;WNT3;CALR;CFL1;NTN1;PROX1;MDM2;ADCY6;BHLHE40;CAPRIN1;SRF;DVL1;HES2;RAP1A;ITGA3;EEF2K;LIMS1;GDI1;HEYL;CREB3L2;CAMK2A;STK11;XRCC2;S1PR2;STX1B;BMPR2;MYLK3;SEMA5A;EFNA5;PLXNA3;PLXND1	positive regulation of neuron projection regeneration	1	0.0460711	NTRK3	extrinsic apoptotic signaling pathway	10	0.0305383	DCC;IL6R;FGFR1;BCL2L11;PEA15;GSK3B;TGFBR1;STK4;ACVR1B;PMAIP1	neuronal stem cell population maintenance	2	0.0305634	HOOK3;SOX2
cellular response to gonadotropin stimulus	2	0.0167445	EFNA5;HMGCS1					tissue migration	21	0.0103336	HMGB1;LGALS8;MAPK14;STC1;ACTA1;VEGFA;CALR;PROX1;PLCG1;SRF;SPRED1;ITGA2;ITGA3;TBXA2R;BCAS3;TGFBR1;S100A2;BMPR2;SEMA5A;VASH1;PLXND1	luteolysis	1	0.0460711	CASP2	fatty-acyl-CoA biosynthetic process	3	0.0305844	ACSL6;ELOVL5;SCD	motor neuron axon guidance	2	0.0305634	RNF165;EPHA4
negative regulation of vascular smooth muscle cell proliferation	2	0.0167445	SOD2;MYOCD					cell activation involved in immune response	43	0.0103428	SURF4;CD55;HMGB1;VAMP2;NFAM1;MAPK14;CYBB;PPIA;SIGLEC14;NSD2;PTGES2;LEF1;PDXK;RAB7A;RARA;RAB5C;RORA;RAB5B;PKP1;GM2A;RAP1A;ADA2;MAGT1;FLG2;MAPK1;NFASC;RAB10;COMMD9;TSPAN14;PLAC8;SYK;QSOX1;HPSE;PGAM1;CD84;IL23R;MLEC;SPN;METTL7A;CD68;CAB39;VAMP8;PAFAH1B2	corticospinal tract morphogenesis	1	0.0460711	EPHA4	phosphatidylinositol 3-kinase binding	3	0.0305844	IRS1;CBL;TYRO3	male genitalia development	2	0.0305634	WNT9B;AR
histone methyltransferase complex	4	0.0167616	POGZ;REST;PHF19;CBX5					negative regulation of proteolysis	24	0.0103971	CSNK2A1;CD55;SERPINA4;GLG1;SMARCC1;VEGFA;PML;SUFU;LEF1;RPS6KA3;PAX2;SH3RF1;CRB2;MDM2;XIAP;YOD1;CST9;UBE2G2;TNFSF14;PSMF1;USP14;A2ML1;TNFAIP8;DHCR24	positive regulation of cholesterol metabolic process	1	0.0460711	PRKAA1	phosphatidylinositol phosphate phosphatase activity	3	0.0305844	PIKFYVE;MTMR3;MTMR9	organ induction	2	0.0305634	AR;FRS2
single-stranded RNA binding	4	0.0167616	HMGB1;FXR1;SYNCRIP;CBX6					protein localization to cell periphery	22	0.0104052	KCNIP3;CAV1;PALM;VAMP2;IQSEC2;RTKN;BBS1;RAP1A;ITGA3;GPSM2;AP2M1;OPTN;NFASC;RAB15;ANK1;RAB10;TSPAN14;AKT2;STX1B;PIK3R1;WNK3;VAMP8	testosterone biosynthetic process	1	0.0460711	STAR	nucleobase-containing small molecule metabolic process	25	0.0307496	PDK1;FXN;PANK2;UGGT1;H6PD;ARNT;PDP2;GNPNAT1;THEM4;DHTKD1;CYCS;GFPT1;PANK3;ACSL6;ELOVL5;GPI;PFKFB3;HMGCS1;ENTPD5;PGM2L1;CDIPT;SCD;RAN;MAPK1;PFKFB2	uterus development	2	0.0305634	ESR1;WNT9B
phosphatase regulator activity	4	0.0167616	PPP1R1A;PPP1R11;PPP1R12A;ARPP19					reproduction	78	0.0104356	DDX6;KPNA6;CREBRF;CLIC5;ESR1;ACTR1A;PAQR7;FBXW8;MAPK14;STC1;STX2;SMARCC1;MYOCD;VEGFA;CELF4;WDR33;PGR;GRB2;EIF4H;CDKN1B;CCNE2;LEF1;SMAD4;ANTXR2;DDR1;RARA;WNT3;CBX2;TOB2;AGO2;CALR;PRLR;SMC2;FGF9;TUBGCP3;BASP1;ITGA2;STK4;CELF1;FANCC;STK35;MCM8;SENP2;WNT9B;ITGA3;TIAL1;RACGAP1;LDOC1;MAFF;FAM9B;MAPK1;MYCBP;FOSL1;SGO1;STK11;ACVR2A;XRCC2;FSTL3;TGFBR1;FEM1B;ZSCAN2;ABHD2;ZBTB16;FANCA;METTL14;ACOX1;BMPR2;SS…	regulation by virus of viral protein levels in host cell	1	0.0460711	DDB1	mesenchyme morphogenesis	4	0.0309012	BMP7;FGFR1;HEYL;TGFBR1	regulation of axon regeneration	2	0.0305634	NTRK3;EPHA4
cellular response to organic cyclic compound	12	0.0170529	CAV1;HNF4A;REST;ERRFI1;LEF1;AKAP13;ELK1;HEYL;LARP1;EFNA5;GRAMD1B;HMGCS1					epithelial tube formation	12	0.0104541	SUFU;SDC4;RARA;PAX2;CFL1;PROX1;DVL1;STK4;WNT9B;MTHFR;MTHFD1;KDM2B	regulation of pro-B cell differentiation	1	0.0460711	FNIP1	activation of innate immune response	11	0.0310262	HMGB1;RPS6KA3;MAVS;TSPAN6;TIRAP;IRAK4;F2RL1;BTK;IKBKG;LILRA2;TYRO3	positive regulation of toll-like receptor signaling pathway	2	0.0305634	HMGB1;CAV1
actomyosin structure organization	6	0.0170926	MET;SMAD4;AKAP13;RTKN;MYH14;SDC4					regulation of cellular carbohydrate metabolic process	12	0.0104541	HMGB1;PDK3;ARPP19;DYRK2;IGFBP4;SESN2;RORA;PTPN2;NTSR1;AKT2;PHKG2;PGAM1	positive regulation of intrinsic apoptotic signaling pathway in response to DNA damage	1	0.0460711	SKIL	cell activation involved in immune response	24	0.0311883	MYB;HMGB1;RAB27A;KCMF1;F2RL1;HPSE;TSPAN14;BTK;BCL6;GPI;PTGES2;EEF1A1;CBL;QSOX1;GATA2;CAB39;RIF1;LILRA2;NFASC;GPR183;LAMTOR1;RAB5B;MAPK1;CYB5R3	positive regulation of interferon-alpha production	2	0.0305634	HMGB1;TLR7
plasma membrane receptor complex	6	0.0170926	IRS1;IL6R;GPR156;ITGA3;SYK;SHISA9					regulation of posttranscriptional gene silencing	7	0.0104816	ESR1;FXR1;MYCN;AGO2;TP53;POLR2E;XPO5	pointed-end actin filament capping	1	0.0460711	TMOD2	cellular response to DNA damage stimulus	27	0.0313687	HMGB1;MCM8;CDK9;ZNF652;XRCC2;SMG1;NFATC2;MCTS1;APTX;PHLDA3;BCL2L11;BCL6;RAD51AP1;PEA15;CBL;IKBKG;BTG2;RAD18;CDC14B;RIF1;GEN1;NABP1;PMAIP1;CBX5;MAPK1;MYO6;SETD7	extracellular matrix structural constituent conferring compression resistance	2	0.0305634	PRELP;VCAN
[truncated: 439 more rows]

## Sheet: DAVID
Supplementary Table 4B. DAVID enrichment analysis of miRNA for White，Black and Asian PCa patients.
Asian VS Black								Asian VS White								Black VS White
Black				Asian				White				Asian				White				Black
[truncated: 366 more rows]
