# Supplementary material for: Comprehensive signature analysis of drug metabolism differences in the White, Black and Asian prostate cancer patients
Source: Aging (Albany NY). 2021 Jun 18;13(12):16316–40. doi: 10.18632/aging.203158 (PMC8266326; doi:10.18632/aging.203158)
Supplement: Supplementary Table 5 [file aging-13-203158-s006.xlsx]

## Sheet: GSEA
Supplementary Table 5. GSEA enrichment analysis of lncRNA for White,Black and Asian PCa patients.
Asian VS Black								Asian VS White								Black VS White
Black				Asian				White				Asian				White				Black
GS<br> follow link to MSigDB	SIZE	NOM p-val	FDR q-val	GS<br> follow link to MSigDB	SIZE	NOM p-val	FDR q-val	GS<br> follow link to MSigDB	SIZE	NOM p-val	FDR q-val	GS<br> follow link to MSigDB	SIZE	NOM p-val	FDR q-val	GS<br> follow link to MSigDB	SIZE	NOM p-val	FDR q-val	GS<br> follow link to MSigDB	SIZE	NOM p-val	FDR q-val
creighton endocrine therapy resistance 1	17	0.00157233	0.0217489	debiasi apoptosis by reovirus infection up	2	0	1	creighton endocrine therapy resistance 1	17	0.00166389	0.00157985									creighton endocrine therapy resistance 1	17	0.0730337	0.517733
creighton endocrine therapy resistance 2	14	0.00972447	0.141509	sana response to ifng up	2	0.00211864	1	krige response to tosedostat 6hr up	30	0	0									zwang down by 2nd egf pulse	17	0.295938	1
massarweh tamoxifen resistance dn	13	0.0352941	0.145484	winter hypoxia dn	2	0.00623701	0.697246	krige response to tosedostat 24hr up	25	0	0									acevedo methylated in liver cancer dn	25	0.328244	1
creighton endocrine therapy resistance 5	8	0.0447761	0.194918	der ifn alpha response up	1	0.00819672	1	dodd nasopharyngeal carcinoma dn	29	0	0									zhou inflammatory response live up	17	0.553232	1
krige response to tosedostat 6hr up	30	0	0.00735047	seitz neoplastic transformation by 8p deletion up	1	0.0139165	1	johnstone parvb targets 3 dn	16	0	0									osman bladder cancer dn	16	0.73743	1
krige response to tosedostat 24hr up	25	0	0.00664509	zhang interferon response	1	0.0131004	0.997606	krige response to tosedostat 6hr dn	19	0	0									gozgit esr1 targets dn	29	0.798893	1
krige response to tosedostat 24hr dn	23	0.0028777	0.0194683	zhu cmv 8 hr up	1	0.0146444	0.931726	krige response to tosedostat 24hr dn	23	0	0									krige response to tosedostat 24hr dn	23	0.871028	1
dodd nasopharyngeal carcinoma dn	29	0.00144509	0.0190748	hecker ifnb1 targets	1	0.01002	0.887408	rodrigues thyroid carcinoma poorly differentiated dn	19	0	0.00138237									rattenbacher bound by celf1	19	0.885338	1
krige response to tosedostat 6hr dn	19	0	0.0210648	mikkelsen es icp with h3k4me3	1	0.0145228	0.849752	chemnitz response to prostaglandin e2 dn	19	0	0.00233749									krige response to tosedostat 6hr dn	19	0.913793	1
johnstone parvb targets 3 dn	16	0	0.0192464	hanson hras signaling via nfkb	1	0.0102669	0.820619	gozgit esr1 targets dn	29	0.00301205	0.0146148									johnstone parvb targets 3 dn	16	0.943662	0.948803
gozgit esr1 targets dn	29	0.00426136	0.025332	bowie response to tamoxifen	1	0.00787402	0.773727	zwang down by 2nd egf pulse	17	0.00470219	0.014711
ginestier breast cancer 20q13 amplification dn	11	0.00169491	0.0244517	einav interferon signature in cancer	1	0.00840336	0.731515	dodd nasopharyngeal carcinoma up	78	0.00927152	0.0512265
zwang down by 2nd egf pulse	17	0	0.0323804	reactome interferon gamma signaling	1	0.0147679	0.696126	odonnell tfrc targets up	43	0.0242165	0.0667898
rodrigues thyroid carcinoma poorly differentiated dn	19	0	0.0337196	reactome oas antiviral response	1	0.0107296	0.66465
chicas rb1 targets senescent	11	0.00988468	0.0349329	browne hcmv infection 6hr up	1	0.0124481	0.637222
koinuma targets of smad2 or smad3	9	0.00676819	0.0413401	rozanov mmp14 targets up	1	0.0103734	0.619419
chandran metastasis up	11	0.00314465	0.0471807	semba fhit targets up	1	0.0140845	0.59291
vecchi gastric cancer early dn	10	0.003367	0.0562506	bilban b cll lpl up	1	0.0101626	0.578593
lastowska neuroblastoma copy number dn	8	0.00664452	0.0681879	ferreira ewings sarcoma unstable vs stable dn	1	0.012	0.557744
pedersen metastasis by erbb2 isoform 7	12	0.0150754	0.0641768	reactome antiviral mechanism by ifn stimulated genes	1	0.0104603	0.538511
ginestier breast cancer znf217 amplified dn	7	0.00490196	0.0612563	graessmann response to mc and serum deprivation up	1	0.020202	0.519088
thum systolic heart failure dn	13	0.0144462	0.0916054	browne interferon responsive genes	1	0.00684931	0.492413
liao metastasis	8	0.010582	0.104711	gobert core oligodendrocyte differentiation	1	0.00618557	0.490833
pedrioli mir31 targets dn	6	0.0052356	0.101803	douglas bmi1 targets dn	1	0.0228216	0.479043
wang lmo4 targets up	13	0.0256798	0.126261	stambolsky targets of mutated tp53 dn	1	0.0105263	0.465799
charafe breast cancer luminal vs mesenchymal up	6	0.0253807	0.157904	durchdewald skin carcinogenesis up	1	0.010142	0.45337
martens bound by pml rara fusion	5	0.0162749	0.153469	sana tnf signaling up	1	0.0142276	0.442339
thum systolic heart failure up	11	0.0326797	0.170385	sesto response to uv c2	1	0.0240964	0.433547
rodrigues thyroid carcinoma anaplastic dn	13	0.0260586	0.166549	der ifn beta response up	1	0.0141988	0.423904
osman bladder cancer up	6	0.0348432	0.161718	reactome interferon alpha beta signaling	1	0.00831601	0.418895
hoelzel nf1 targets dn	7	0.0355412	0.197782	zhu cmv 24 hr up	1	0.0102041	0.409374
wang response to gsk3 inhibitor sb216763 up	7	0.0363951	0.197047	chen metabolic syndrom network	1	0.00808081	0.400012
				issaeva mll2 targets	1	0.00787402	0.392479
				matzuk ovulation	1	0.00408998	0.384383
				zhu cmv all up	1	0.0143737	0.375508
				bennett systemic lupus erythematosus	1	0.0105708	0.368539
				smirnov response to ir 6hr dn	1	0.0258964	0.363467
				korkola embryonal carcinoma	1	0.0406504	0.356462
				bowie response to extracellular matrix	1	0.00845666	0.352457
				yang bcl3 targets up	1	0.0184426	0.347075
				farmer breast cancer cluster 1	1	0.0128755	0.343692
				graessmann response to mc and doxorubicin up	1	0.00890869	0.337244
				foster kdm1a targets up	1	0.0147059	0.33175
				chiang liver cancer subclass polysomy7 up	1	0.0388548	0.329404
				moserle ifna response	1	0.0107527	0.324107
				krasnoselskaya ilf3 targets up	1	0.0186722	0.324171
				reactome cytokine signaling in immune system	1	0.0116959	0.324232
				reactome interferon signaling	1	0.0077821	0.32086
				dauer stat3 targets dn	1	0.0203252	0.320952
				yagi aml with t 9 11 translocation	1	0.0105263	0.328064
				tonks targets of runx1 runx1t1 fusion monocyte up	1	0.015873	0.346145
