# Supplementary material for: Comprehensive signature analysis of drug metabolism differences in the White, Black and Asian prostate cancer patients
Source: Aging (Albany NY). 2021 Jun 18;13(12):16316–40. doi: 10.18632/aging.203158 (PMC8266326; doi:10.18632/aging.203158)
Supplement: Supplementary Table 6 [file aging-13-203158-s007.xlsx]

## Sheet: GSEA
Supplementary Table 6A. GSEA enrichment analysis of DNA methylation for White,Black and Asian PCa patients.
Asian VS Black								Asian VS White								Black VS White
Black				Asian				White				Asian				White				Black
GS<br> follow link to MSigDB	SIZE	NOM p-val	FDR q-val	GS<br> follow link to MSigDB	SIZE	NOM p-val	FDR q-val	GS<br> follow link to MSigDB	SIZE	NOM p-val	FDR q-val	GS<br> follow link to MSigDB	SIZE	NOM p-val	FDR q-val	GS<br> follow link to MSigDB	SIZE	NOM p-val	FDR q-val	GS<br> follow link to MSigDB	SIZE	NOM p-val	FDR q-val
kegg metabolism of xenobiotics by cytochrome p450	57	0.00352113	1	nelson response to androgen dn	16	0.034749	0.234517	riggins tamoxifen resistance up	65	0.0120482	0.138703	reactome_g0_and_early_g1	26	0.00581395	1	wallace_prostate_cancer_race_dn	77	0	1	reactome_olfactory_signaling_pathway	326	0.00250627	1
kegg drug metabolism cytochrome p450	58	0.00714286	1	kang doxorubicin resistance up	48	0.0350515	0.243323	mahadevan imatinib resistance up	17	0.012474	0.135057	reactome_g1_s_specific_transcription	28	0.015748	1	sana_response_to_ifng_dn	78	0.00596422	1	kegg_olfactory_transduction	332	0.00252525	1
reactome cytochrome p450 arranged by substrate type	60	0.0158416	0.717368	xu response to tretinoin dn	11	0	0.218701	wang prostate cancer androgen independent	59	0.0294118	0.136367	wong_proteasome_gene_module	46	0.01341	1	aigner_zeb1_targets	32	0.00843882	1	reactome_g_alpha_s_signalling_events	456	0.00987654	1
yague pretumor drug resistance dn	12	0.0495868	0.603452	wallace prostate cancer race dn	77	0.00189753	0.191567	creighton endocrine therapy resistance 1	485	0.0183299	0.137251	rhodes_undifferentiated_cancer	63	0.0440613	1	gargalovic_response_to_oxidized_phospholipids_yellow_dn	20	0	1
biocarta cacam pathway	9	0	1	reactome interconversion of nucleotide di and triphosphates	27	0	0.17074	massarweh tamoxifen resistance dn	227	0.0217391	0.143836	reactome_cyclin_a:cdk2_associated_events_at_s_phase_entry	77	0.0459559	1	karlsson_tgfb1_targets_up	109	0.002079	1
hollern adenomyoepithelial breast tumor	15	0.00394477	1	biocarta skp2e2f pathway	10	0	0.161488	creighton endocrine therapy resistance 4	275	0.0321932	0.142336	wang_metastasis_of_breast_cancer_esr1_up	19	0.0177165	1	reactome_rho_gtpases_activate_wasps_and_waves	35	0	1
hedenfalk breast cancer bracx up	15	0.00408998	1	boyault liver cancer subclass g23 up	48	0	0.195313	suzuki response to tsa and decitabine 1a	18	0.0149254	0.145721	yuan_znf143_partners	21	0.0211538	0.986419	lockwood_amplified_in_lung_cancer	202	0.00618557	1
west adrenocortical tumor dn	491	0.0203252	1	caffarel response to thc 24hr 5 up	30	0.0140562	0.249156	kegg metabolism of xenobiotics by cytochrome p450	57	0.0172414	0.147227	reactome_transcription_of_e2f_targets_under_negative_control_by_p107_rbl1_and_p130_rbl2_in_complex_with_hdac1	15	0.0138889	0.928683	gross_hypoxia_via_elk3_and_hif1a_dn	96	0.00413223	1
reactome synthesis of bile acids and bile salts	31	0.011194	1	vecchi gastric cancer early up	394	0.0344828	0.249525	kim response to tsa and decitabine up	119	0.0232108	0.147517	pujana_breast_cancer_with_brca1_mutated_up	54	0.0474308	0.991183	mootha_pgc	384	0.0400802	1
reactome synthesis of bile acids and bile salts via 7alpha hydroxycholesterol	22	0.00934579	1	odonnell targets of myc and tfrc dn	42	0.0125786	0.249988	kegg drug metabolism cytochrome p450	58	0.0209059	0.155088	li_wilms_tumor_anaplastic_up	17	0.0272374	0.972184	dittmer_pthlh_targets_up	107	0.00626305	1
reactome glucagon like peptide 1 glp1 regulates insulin secretion	39	0.0019685	1	li wilms tumor anaplastic up	17	0.00210084	0.248514	kaab heart atrium vs ventricle up	243	0.00621118	0.244351	odonnell_targets_of_myc_and_tfrc_dn	42	0.0494071	0.925297	smith_tert_targets_up	137	0.00425532	1
reactome notch2 intracellular domain regulates transcription	12	0.00408998	1	reactome conversion from apc c:cdc20 to apc c:cdh1 in late anaphase	19	0.00389105	0.24656	reactome rho gtpases activate paks	20	0.00631579	0.242983	yu_myc_targets_up	40	0.0435644	0.877539	gross_hypoxia_via_elk3_up	192	0.0125523	1
biocarta wnt pathway	23	0.00576923	1	bidus metastasis up	201	0.0401606	0.245945	ohm methylated in adult cancers	26	0	0.23531	jeon_smad6_targets_dn	18	0.0284553	0.88833	markey_rb1_chronic_lof_up	106	0.00609756	1
kegg retinol metabolism	53	0.00176679	1	ongusaha brca1 targets dn	11	0.0275424	0.24643	bonome ovarian cancer survival suboptimal debulking	471	0.002	0.23579	whitfield_cell_cycle_literature	42	0.0392157	0.872387	hollern_emt_breast_tumor_dn	112	0.018595	1
reactome dscam interactions	11	0.00391389	1	reactome activation of noxa and translocation to mitochondria	5	0.0158416	0.246033	tonks targets of runx1 runx1t1 fusion granulocyte up	48	0	0.228778	farmer_breast_cancer_cluster_2	32	0.0311284	0.883472	blum_response_to_salirasib_up	233	0.0168067	1
reactome platelet activation signaling and aggregation	245	0.0185185	1	sotiriou breast cancer grade 1 vs 3 up	141	0.022449	0.243033	nguyen notch1 targets up	27	0.00402414	0.228609	finetti_breast_cancer_kinome_red	16	0.0235294	0.761061	acosta_proliferation_independent_myc_targets_up	77	0.0204918	1
reactome synthesis of bile acids and bile salts via 27 hydroxycholesterol	13	0.00379507	1	liu sox4 targets dn	288	0.0252918	0.243589	pid ajdiss 2pathway	47	0.00838574	0.225929	holleman_prednisolone_resistance_b_all_up	18	0.0191571	0.723464	reactome_pten_regulation	129	0.00613497	1
cairo hepatoblastoma classes dn	199	0.0189753	1	reactome regulation of tp53 activity through phosphorylation	88	0.0319361	0.243067	valk aml cluster 2	24	0	0.229904	finetti_breast_cancers_kinome_gray	15	0.0469043	0.700594	debiasi_apoptosis_by_reovirus_infection_dn	260	0.0103734	1
reactome pervasive developmental disorders	13	0.00666667	1	reactome activation of nima kinases nek9 nek6 nek7	7	0	0.243872	hahtola mycosis fungoides skin up	161	0.00875273	0.227218					alonso_metastasis_up	171	0.021611	1
rampon enriched learning environment late up	19	0.018	1	marson bound by e2f4 unstimulated	622	0.048	0.242501	lu aging brain up	243	0.00208768	0.227877					reactome_metabolism_of_cofactors	19	0.0272904	1
odonnell targets of myc and tfrc up	72	0.0197239	1	west adrenocortical tumor markers up	22	0.0105708	0.240668	reactome synthesis of bile acids and bile salts via 7alpha hydroxycholesterol	22	0	0.225039					li_cytidine_analog_pathway	17	0.00598802	1
reactome nuclear signaling by erbb4	31	0.00206186	1	reactome nuclear pore complex npc disassembly	34	0.0102459	0.242255	reactome signaling by hedgehog	140	0.00197239	0.223244					grade_colon_and_rectal_cancer_up	274	0.0305499	1
reactome gaba receptor activation	52	0	1	jeon smad6 targets dn	18	0.0203666	0.239201	tseng irs1 targets dn	126	0.0056926	0.223291					kegg_pentose_phosphate_pathway	25	0.0298211	1
rankin angiogenic targets of vhl hif2a up	5	0.00201613	1	chemnitz response to prostaglandin e2 up	125	0.0393701	0.238899	kasler hdac7 targets 2 dn	30	0.00623701	0.219893					charafe_breast_cancer_basal_vs_mesenchymal_up	111	0.0350515	1
reactome phase i functionalization of compounds	98	0	1	rosty cervical cancer proliferation cluster	129	0.0143443	0.244634	tomida metastasis dn	18	0.00434783	0.219981					kegg_citrate_cycle_tca_cycle	30	0.0222222	1
reactome response to elevated platelet cytosolic ca2plus	125	0.0124334	1	reactome cdk mediated phosphorylation and removal of cdc6	65	0.0297619	0.244067	reactome response to elevated platelet cytosolic ca2plus	125	0.00179533	0.216407					reactome_glucose_metabolism	86	0.0094162	1
liu vav3 prostate carcinogenesis dn	16	0.0152381	1	reactome switching of origins to a post replicative state	83	0.0379242	0.242163	cairo liver development up	150	0.00817996	0.217074					reactome_eph_ephrin_signaling	87	0.0164271	1
reactome erbb2 regulates cell motility	14	0.00824742	1	inamura lung cancer scc subtypes up	13	0.00607287	0.238254	maloney response to 17aag up	35	0.010395	0.213082					sesto_response_to_uv_c1	66	0.0314961	1
reactome synaptic adhesion like molecules	21	0.0162272	1	kegg spliceosome	117	0.0357143	0.236713	pid ephb fwd pathway	38	0	0.209869					reactome_ephb_mediated_forward_signaling	40	0.0147368	1
basso cd40 signaling dn	65	0.01222	1	chuang oxidative stress response dn	10	0.0077821	0.237875	munshi multiple myeloma up	71	0.026749	0.205761					jiang_hypoxia_normal	189	0.00809717	1
mikkelsen es icp with h3k27me3	35	0	1	reactome cell cycle mitotic	489	0.04158	0.237075	reactome beta catenin independent wnt signaling	131	0.00196078	0.206758					reactome_regulation_of_pten_gene_transcription	59	0.0104822	1
maloney response to 17aag up	35	0.0281125	1	kong e2f3 targets	92	0.0272537	0.241758	darwiche papilloma risk high dn	154	0.0019305	0.202967					stein_esrra_targets_up	349	0.0327198	1
reactome downregulation of erbb2 signaling	25	0.0209205	1	reactome trna processing in the nucleus	54	0.0116054	0.239954	chen lung cancer survival	28	0.0040404	0.201174					martinez_response_to_trabectedin_up	62	0.0329218	1
pid ras pathway	29	0.004	1	mayburd response to l663536 dn	50	0.0294695	0.243779	mcbryan pubertal breast 6 7wk up	175	0.00197239	0.19819					reactome_signaling_by_wnt_in_cancer	33	0.0164609	1
gaussmann mll af4 fusion targets c dn	17	0.00621118	1	sesto response to uv c0	99	0.0476191	0.241998	kinsey targets of ewsr1 flii fusion dn	304	0.00626305	0.195367					li_amplified_in_lung_cancer	167	0.044898	1
iwanaga carcinogenesis by kras dn	111	0.0136187	1	mori immature b lymphocyte dn	86	0.0486815	0.241285	landis erbb2 breast tumors 65 dn	37	0.012	0.198535					biocarta_efp_pathway	16	0.0122951	1
reactome signaling by erbb4	56	0.011976	1	whiteford pediatric cancer markers	107	0.0442656	0.24278	baelde diabetic nephropathy dn	409	0.004158	0.196607					ouellet_ovarian_cancer_invasive_vs_lmp_up	108	0.0286885	1
pid syndecan 3 pathway	16	0.0112994	1	biocarta g2 pathway	24	0.0366795	0.241198	reactome eph ephrin signaling	87	0.00208768	0.200081					reactome_unfolded_protein_response_upr	83	0.0417495	1
reactome ethanol oxidation	12	0.0146789	1	kauffmann dna repair genes	215	0.0457256	0.239833	reactome deactivation of the beta catenin transactivating complex	41	0.00796813	0.197927					reactome_glycolysis	67	0.00770713	1
spielman lymphoblast european vs asian 2fc up	12	0.0214844	1	kegg citrate cycle tca cycle	30	0.0398482	0.238649	cairo hepatoblastoma classes dn	199	0.00378072	0.196682					lau_apoptosis_cdkn2a_up	55	0.0331263	1
korkola teratoma up	15	0.0224033	1	reactome tp53 regulates transcription of genes involved in g2 cell cycle arrest	17	0.015748	0.238794	mullighan mll signature 2 dn	257	0.00619835	0.197347					kegg_galactose_metabolism	26	0.0259259	1
reactome signaling by activin	11	0.0146138	1	burton adipogenesis 3	98	0.0468432	0.237209	chiaradonna neoplastic transformation kras dn	128	0.0169133	0.200441					chicas_rb1_targets_low_serum	75	0.0245399	1
aston major depressive disorder up	43	0.0106383	1	reactome energy dependent regulation of mtor by lkb1 ampk	27	0.010101	0.236176	mcbryan pubertal tgfb1 targets up	156	0.0189474	0.199234					reactome_asymmetric_localization_of_pcp_proteins	56	0.0497018	1
tonks targets of runx1 runx1t1 fusion sustained in monocyte up	20	0.0150215	1	meinhold ovarian cancer low grade dn	17	0.0124481	0.234872	reactome synthesis of bile acids and bile salts	31	0.00185874	0.197312					mili_pseudopodia_chemotaxis_dn	390	0.0147992	1
mcclung delta fosb targets 8wk	47	0.0183299	1	biocarta npc pathway	10	0.0204082	0.233796	chandran metastasis dn	291	0.0224033	0.197448					kegg_base_excision_repair	31	0.0497018	1
reactome opioid signalling	80	0.0171103	1	sarrio epithelial mesenchymal transition up	172	0.0432099	0.233952	hoque methylated in cancer	51	0.00403226	0.196355					le_egr2_targets_up	101	0.0425101	1
reactome signaling by notch2	31	0.0309278	1	croonquist nras signaling dn	65	0.0311203	0.232842	kyng dna damage by gamma and uv radiation	75	0.00192308	0.196579					ongusaha_tp53_targets	32	0.0245399	1
tonks targets of runx1 runx1t1 fusion granulocyte dn	16	0.00208768	1	kegg valine leucine and isoleucine biosynthesis	11	0.0470348	0.232672	sansom wnt pathway require myc	59	0.00817996	0.196951					yao_temporal_response_to_progesterone_cluster_6	67	0.0180361	1
reactome platelet calcium homeostasis	28	0.0160643	1	reactome chk1 chk2 cds1 mediated inactivation of cyclin b:cdk1 complex	13	0.0252918	0.231399	mcclung delta fosb targets 8wk	47	0.00192308	0.199748					kegg_fructose_and_mannose_metabolism	31	0.0275591	1
dacosta ercc3 allele xpcs vs ttd dn	32	0.0186722	1	wallace prostate cancer up	19	0.0325671	0.230209	browne hcmv infection 18hr dn	164	0.00587084	0.199133					tcga_glioblastoma_copy_number_dn	24	0.0227273	1
valk aml cluster 7	26	0.00828157	1	reactome export of viral ribonucleoproteins from nucleus	31	0.010101	0.229735	kyng environmental stress response up	48	0.014862	0.196485					dacosta_uv_response_via_ercc3_ttd_up	53	0.0409836	1
reactome grb2 events in erbb2 signaling	16	0.0162602	1	reactome apc cdc20 mediated degradation of nek2a	24	0.0224033	0.230549	oishi cholangioma stem cell like dn	256	0.0123203	0.193653					zhan_v2_late_differentiation_genes	42	0.03125	1
mcgarvey silenced by methylation in colon cancer	39	0.00197239	1	reactome interactions of vpr with host cellular proteins	34	0.00826446	0.22808	radmacher aml prognosis	72	0.00625	0.190927					sesto_response_to_uv_c2	53	0.0215517	1
reactome g alpha z signalling events	44	0.01	1	pujana brca centered network	111	0.0354167	0.226632	verhaak glioblastoma classical	144	0.00203666	0.191038					concannon_apoptosis_by_epoxomicin_dn	156	0.0159046	1
zheng glioblastoma plasticity dn	52	0.0254403	1	kegg homologous recombination	25	0.0496894	0.225954	pid ar nongenomic pathway	31	0.00406504	0.188471					ramaswamy_metastasis_up	61	0.0298211	1
papaspyridonos unstable aterosclerotic plaque dn	39	0.0330578	1	reactome citric acid cycle tca cycle	22	0.0244821	0.226696	burton adipogenesis 8	70	0.026749	0.187219					tien_intestine_probiotics_24hr_dn	205	0.0458333	1
reactome shc1 events in erbb4 signaling	14	0.0189076	1	scian cell cycle targets of tp53 and tp73 dn	21	0.030888	0.226301	ren alveolar rhabdomyosarcoma dn	382	0.0215517	0.186987					bae_brca1_targets_up	64	0.0347648	1
reactome antigen activates b cell receptor bcr leading to generation of second messengers	30	0.0285714	1	biocarta fbw7 pathway	9	0.0156556	0.226494	browne hcmv infection 20hr dn	89	0	0.184951					wang_tumor_invasiveness_up	336	0.035124	1
yemelyanov gr targets dn	12	0.0310559	1	wang metastasis of breast cancer esr1 up	19	0.028169	0.227645	reactome semaphorin interactions	63	0.00204918	0.183553					mohankumar_hoxa1_targets_up	373	0.0102249	1
boquest stem cell up	238	0.0313808	1	mms mouse lymph high 4hrs up	31	0.0363985	0.226877	pasini suz12 targets dn	289	0.0128205	0.183006					kyng_environmental_stress_response_not_by_uv_in_old	23	0.0244898	1
plasari tgfb1 targets 1hr dn	5	0.00209205	1	yu bap1 targets	28	0.0310559	0.22587	manalo hypoxia up	191	0.00621118	0.180788					burton_adipogenesis_peak_at_24hr	43	0.036961	1
browne hcmv infection 30min up	48	0.00943396	1	chiang liver cancer subclass unannotated dn	177	0.0430712	0.231382	gaussmann mll af4 fusion targets a dn	86	0.0019685	0.179584					zhan_variable_early_differentiation_genes_dn	28	0.0101626	1
kim all disorders duration corr up	9	0.0119048	1	jiang hypoxia cancer	55	0.0248963	0.231504	delaserna myod targets dn	51	0.00813008	0.179786					jaervinen_amplified_in_laryngeal_cancer	38	0.0178571	1
pid anthrax pathway	17	0.0413223	1	reactome polb dependent long patch base excision repair	7	0.012	0.231341	bertucci medullary vs ductal breast cancer dn	163	0.0141414	0.177996					wamunyokoli_ovarian_cancer_grades_1_2_up	130	0.0354906	1
abe inner ear	39	0.0447154	1	chandran metastasis top50 up	31	0.0222222	0.233037	pid wnt canonical pathway	20	0.00203666	0.1765					stein_esrra_targets	480	0.0206612	1
matzuk embryonic germ cell	20	0.0102249	1	reactome golgi cisternae pericentriolar stack reorganization	14	0.0216963	0.232445	pomeroy medulloblastoma prognosis up	45	0.00395257	0.174459					reactome_mitophagy	24	0.0163265	1
chiang liver cancer subclass interferon dn	50	0	1	hollern emt breast tumor dn	112	0.0427509	0.23134	lindvall immortalized by tert up	66	0.0124224	0.172415					pid_met_pathway	77	0.0171674	1
tonks targets of runx1 runx1t1 fusion sustained in granulocyte up	14	0.0212766	0.994693	pujana breast cancer with brca1 mutated up	54	0.0421053	0.233544	molenaar targets of ccnd1 and cdk4 up	58	0	0.172358					zhan_multiple_myeloma_cd2_dn	43	0.00813008	1
changolkar h2afy targets dn	36	0.00657895	0.981222	iizuka liver cancer progression g1 g2 dn	24	0.00407332	0.235418	kegg gnrh signaling pathway	99	0	0.17223					kim_hypoxia	18	0.0303644	1
valk aml cluster 3	28	0.0123967	0.981134	ding lung cancer expression by copy number	95	0.0415842	0.235178	aprelikova brca1 targets	45	0.0116505	0.17146					alfano_myc_targets	221	0.0392562	1
ding lung cancer by mutation rate	19	0.008	0.967776	biocarta cellcycle pathway	23	0.0442308	0.236569	reactome diseases associated with glycosaminoglycan metabolism	39	0	0.169511					elvidge_hif1a_and_hif2a_targets_up	38	0.0367347	1
reactome chylomicron clearance	5	0.00417537	0.962131	reactome folding of actin by cct tric	10	0.013308	0.234719	reactome opioid signalling	80	0	0.169452					sig_cd40pathwaymap	33	0.0199601	1
biocarta ami pathway	20	0.00868056	0.949782	reactome pentose phosphate pathway	13	0.0262582	0.233057	gruetzmann pancreatic cancer dn	181	0.00828157	0.168635					boyault_liver_cancer_subclass_g1_up	101	0.0281125	1
reactome the canonical retinoid cycle in rods twilight vision	22	0.00961539	0.961233	reactome mitotic prometaphase	182	0.0486815	0.23306	kyng werner syndrom and normal aging dn	179	0.00772201	0.167952					kegg_rna_degradation	51	0.0491159	1
tonks targets of runx1 runx1t1 fusion sustained in granulocyte dn	7	0.00206186	0.950416	reactome condensation of prometaphase chromosomes	9	0.0162933	0.232445	reactome negative regulation of met activity	20	0.004158	0.166609					reactome_darpp_32_events	21	0.0319361	1
reactome activated ntrk2 signals through cdk5	6	0.0163934	0.954077	reactome dna repair	296	0.0486815	0.232465	biocarta nfat pathway	50	0.0071048	0.16484					pid_erbb1_downstream_pathway	104	0.0266393	1
wilcox response to progesterone dn	55	0.0240481	0.951198	le egr2 targets up	101	0.0497018	0.232421	hwang prostate cancer markers	27	0.0180361	0.163998					flechner_pbl_kidney_transplant_ok_vs_donor_up	145	0.0188679	1
reactome adrenaline noradrenaline inhibits insulin secretion	25	0.0176471	0.950085	le neuronal differentiation dn	18	0.0184426	0.235052	reactome signaling by receptor tyrosine kinases	449	0.00583658	0.162344					hernandez_mitotic_arrest_by_docetaxel_1_up	29	0.0138614	1
pid ephrinb rev pathway	30	0.030303	0.940277	mootha tca	16	0.0328185	0.234135	rutella response to hgf dn	224	0.0147368	0.161271					reactome_transcriptional_regulation_by_runx2	111	0.0283401	1
kegg primary bile acid biosynthesis	15	0.0135922	0.939331	biocarta etc pathway	8	0.0212766	0.233498	onken uveal melanoma dn	489	0.00808081	0.163145					west_adrenocortical_carcinoma_vs_adenoma_up	19	0.0346232	1
reactome ephrin signaling	17	0.031185	0.91833	reactome protein methylation	13	0.00389105	0.232891	reactome regulation of fzd by ubiquitination	20	0.00631579	0.164813					vanoevelen_myogenesis_sin3a_targets	194	0.0143443	1
claus pgr positive meningioma up	9	0.0283401	0.909052	reactome ptk6 regulates cell cycle	6	0.0276134	0.237549	brueckner targets of mirlet7a3 up	102	0.00377358	0.163946					nelson_response_to_androgen_dn	16	0.024948	1
reactome ra biosynthesis pathway	21	0.00984252	0.907515	reactome transcription of e2f targets under negative control by dream complex	18	0.0483871	0.238933	li wilms tumor vs fetal kidney 1 up	172	0.00204499	0.162421					riz_erythroid_differentiation_hemgn	25	0.0275049	1
reactome pka mediated phosphorylation of key metabolic factors	5	0.0181452	0.906359	reactome transport of mature mrnas derived from intronless transcripts	40	0.0207039	0.238974	yagi aml with t 9 11 translocation	126	0.0137525	0.162588					boyault_liver_cancer_subclass_g2	27	0.0168776	1
reactome interaction between l1 and ankyrins	29	0.0141129	0.896247	reactome sumoylation of sumoylation proteins	33	0.00821355	0.23839	kegg wnt signaling pathway	147	0.00988142	0.161557					gazin_epigenetic_silencing_by_kras	24	0.037037	1
acevedo liver tumor vs normal adjacent tissue dn	244	0.0213178	0.890753	reactome nucleobase biosynthesis	15	0.0338346	0.23795	reactome l1cam interactions	112	0.00402414	0.162162					gentile_uv_response_cluster_d7	34	0.0272537	1
zhu cmv all dn	114	0.0454545	0.885531	caffarel response to thc dn	30	0.0415842	0.236895	martinez rb1 targets dn	483	0.00963391	0.160759					weigel_oxidative_stress_response	33	0.0378486	1
kim liver cancer poor survival dn	42	0.0107143	0.886974	den interact with lca5	25	0.0291262	0.236061	bakker foxo3 targets dn	152	0.00986193	0.161421					pid_ecadherin_stabilization_pathway	38	0.046371	1
bertucci invasive carcinoma ductal vs lobular dn	42	0.0364372	0.892985	ivanov mutated in colon cancer	13	0.0162272	0.236564	johansson brain cancer early vs late dn	41	0.0201613	0.160408					yih_response_to_arsenite_c4	17	0.0258449	1
reactome regulation of insulin secretion	74	0.0271318	0.900848	lee metastasis and rna processing up	16	0.0131332	0.236506	jiang aging cerebral cortex dn	45	0.02079	0.161295					reactome_hiv_elongation_arrest_and_recovery	27	0.0445344	1
kim gastric cancer chemosensitivity	89	0.0220884	0.89499	reactome termination of translesion dna synthesis	30	0.037037	0.237327	rozanov mmp14 targets up	242	0.0177515	0.162387					reactome_rab_regulation_of_trafficking	111	0.00824742	1
kegg taste transduction	33	0.0110497	0.888606	biocarta eif pathway	15	0.00583658	0.23654	beier glioma stem cell dn	62	0.0104167	0.161374					reactome_tight_junction_interactions	28	0.0292969	1
chiaretti t all refractory to therapy	26	0.0381526	0.884476	rickman tumor differentiated moderately vs poorly dn	14	0.0390456	0.238468	davicioni targets of pax foxo1 fusions up	240	0.0102881	0.16025					maclachlan_brca1_targets_up	20	0.0470348	1
reactome ion channel transport	177	0.0135397	0.875738	holleman asparaginase resistance all dn	21	0.0244821	0.23848	la men1 targets	21	0	0.160252					sartipy_blunted_by_insulin_resistance_dn	17	0.039666	1
wong endmetrium cancer dn	67	0.0105042	0.872246	johansson brain cancer early vs late up	8	0.0193133	0.237945	kayo calorie restriction muscle up	90	0.00968992	0.159395					reactome_signaling_by_vegf	102	0.0371134	1
colin pilocytic astrocytoma vs glioblastoma up	32	0.0347648	0.86895	biocarta bard1 pathway	8	0.0186335	0.237412	liang hematopoiesis stem cell number qtl	15	0.00652174	0.158756					lin_melanoma_copy_number_dn	37	0.046748	1
pid hnf3a pathway	41	0.0346821	0.865482	barrier cancer relapse tumor sample up	16	0.0232108	0.23677	onder cdh1 signaling via ctnnb1	80	0.00835073	0.157832					yokoe_cancer_testis_antigens	33	0.0176471	1
reactome tyrosine catabolism	5	0.00207039	0.857752	reactome mrna decay by 5 to 3 exoribonuclease	14	0.0233463	0.234468	lu aging brain dn	143	0.00782779	0.156534					reactome_phase_4_resting_membrane_potential	19	0.00992064	1
reactome gaba b receptor activation	35	0.0137795	0.850832	schlosser myc and serum response synergy	29	0.0421585	0.233787	vart kshv infection angiogenic markers dn	123	0.00190476	0.157827					pid_rac1_pathway	53	0.030303	1
reactome platelet aggregation plug formation	38	0.0359589	0.844864	whitfield cell cycle literature	42	0.0227273	0.233323	fernandez bound by myc	173	0.014433	0.156698					wang_tumor_invasiveness_dn	197	0.031185	1
ivanova hematopoiesis stem cell short term	21	0.00790514	0.840026	mathew fanconi anemia genes	11	0.016	0.2348	lindgren bladder cancer cluster 2a dn	130	0.00831601	0.156629					kuninger_igf1_vs_pdgfb_targets_dn	40	0.029106	1
okawa neuroblastoma 1p36 31 deletion	22	0.044	0.836816	reactome inhibition of the proteolytic activity of apc c required for the onset of anaphase by mitotic spindle checkpoint components	20	0.0276134	0.236509	browne hcmv infection 24hr dn	131	0.0100402	0.156767					reactome_rna_polymerase_ii_transcription_elongation	51	0.0482897	1
figueroa aml methylation cluster 6 dn	32	0.00809717	0.830582	reactome intrinsic pathway for apoptosis	49	0.045098	0.233394	reactome gamma carboxylation hypusine formation and arylsulfatase activation	38	0.00564972	0.156487					liu_sox4_targets_dn	288	0.0466102	1
browne hcmv infection 18hr dn	164	0.0261044	0.827883	mellman tut1 targets up	19	0.0220441	0.233144	wilcox response to progesterone dn	55	0.00386847	0.155297					reactome_n_glycan_antennae_elongation_in_the_medial_trans_golgi	26	0.0362595	1
reactome dissolution of fibrin clot	13	0.0288462	0.822199	reactome smac xiap regulated apoptotic response	7	0.00742115	0.232274	elvidge hif1a targets dn	85	0.0123967	0.154276					reactome_rna_polymerase_ii_transcribes_snrna_genes	67	0.0466531	0.994719
west adrenocortical tumor markers dn	17	0.0215686	0.814621	reactome purine ribonucleoside monophosphate biosynthesis	12	0.0320755	0.231926	reactome chondroitin sulfate dermatan sulfate metabolism	49	0	0.15318					hummerich_malignant_skin_tumor_up	16	0.0316206	0.971231
pid trkr pathway	61	0.026971	0.817232	reactome mitotic telophase cytokinesis	12	0.00811359	0.235766	browne hcmv infection 48hr dn	435	0.011811	0.151985					mellman_tut1_targets_dn	43	0.0350515	0.964431
lee neural crest stem cell up	137	0.034	0.813698	smid breast cancer luminal a dn	18	0.0465587	0.23519	senese hdac1 targets dn	226	0.0165289	0.151374					reactome_trans_golgi_network_vesicle_budding	68	0.0442656	0.947049
reactome trp channels	27	0.0120482	0.809361	reactome negative regulation of notch4 signaling	47	0.0469565	0.235392	reactome signaling by fgfr2 iiia tm	18	0.0330578	0.150683					burton_adipogenesis_10	28	0.0407725	0.940809
reactome pi3k events in erbb2 signaling	16	0.0227743	0.808377	reactome global genome nucleotide excision repair gg ner	81	0.0320755	0.235393	nadler obesity dn	42	0.0038835	0.152701					enk_uv_response_epidermis_up	284	0.0362473	0.942524
reactome aquaporin mediated transport	48	0.0263158	0.802703	reactome interactions of rev with host cellular proteins	35	0.028866	0.235835	vandesluis commd1 targets group 4 up	15	0.00767754	0.152624					mootha_tca	16	0.0421687	0.935174
white neuroblastoma with 1p36.3 deletion	20	0.0435685	0.796324	reactome dna damage recognition in gg ner	37	0.0162162	0.235048	aston major depressive disorder dn	149	0.00603622	0.153286					reactome_pink_parkin_mediated_mitophagy	17	0.0145228	0.930347
de yy1 targets up	19	0.0194553	0.792038	caffarel response to thc 8hr 3 dn	9	0.0185185	0.234248	lee aging muscle dn	37	0.019084	0.152185					lin_melanoma_copy_number_up	65	0.0466926	0.94765
nikolsky breast cancer 12q24 amplicon	15	0.0498915	0.789238	reactome interleukin 36 pathway	7	0.03	0.233493	lee aging muscle up	34	0.0178571	0.151085					biocarta_mpr_pathway	21	0.0329897	0.942586
lui thyroid cancer cluster 5	16	0.0252918	0.776529	reactome translesion synthesis by y family dna polymerases bypasses lesions on dna template	36	0.0454545	0.232619	mcbryan pubertal breast 4 5wk dn	178	0.0060241	0.150426					korkola_teratoma	37	0.0404858	0.932553
reactome formation of fibrin clot clotting cascade	38	0.00518135	0.772514	reactome regulation of pten gene transcription	59	0.0429688	0.232158	zhu cmv all dn	114	0.0238095	0.152237					biocarta_ecm_pathway	19	0.0258621	0.923652
reactome fceri mediated mapk activation	32	0.0495868	0.767028	kegg one carbon pool by folate	17	0.046332	0.231487	burton adipogenesis 7	44	0.0230126	0.151353					reactome_antigen_processing:_ubiquitination_proteasome_degradation	280	0.0206612	0.922857
reactome activated ntrk2 signals through ras	9	0.0404255	0.76189	udayakumar med1 targets up	125	0.0485981	0.230624	acevedo normal tissue adjacent to liver tumor dn	315	0.015534	0.151595					linsley_mir16_targets	193	0.0404255	0.895634
reactome g protein activation	23	0.0307414	0.760227	reactome transport of the slbp dependant mature mrna	34	0.018595	0.232755	breuhahn growth factor signaling in liver cancer	23	0.00409836	0.152304					ghandhi_direct_irradiation_dn	33	0.0371134	0.888117
hernandez mitotic arrest by docetaxel 2 dn	14	0.0192308	0.759634	ohashi aurka targets	8	0.0185567	0.231945	naderi breast cancer prognosis dn	17	0.0170213	0.151199					reactome_neddylation	214	0.0220884	0.886889
reactome retrograde neurotrophin signalling	14	0.0491803	0.755385	kegg mismatch repair	22	0.0449898	0.231104	alonso metastasis up	171	0.0119284	0.150673					reactome_citric_acid_cycle_tca_cycle	22	0.0411523	0.879433
reactome ngf independant trka activation	5	0.00209205	0.75422	eguchi cell cycle rb1 targets	20	0.00845666	0.232439	wood ebv ebna1 targets up	101	0.00665188	0.149995					matzuk_ovulation	16	0.0338645	0.878195
alonso metastasis neural up	16	0.0389105	0.752186	reactome transport of mature transcript to cytoplasm	73	0.0487288	0.236415	iglesias e2f targets up	134	0.0237069	0.14928					smid_breast_cancer_erbb2_up	132	0.039749	0.874851
yamashita liver cancer stem cell dn	73	0.0143113	0.746946	biocarta eif2 pathway	10	0.00978474	0.237838	koyama sema3b targets up	225	0.0019685	0.149175					reactome_transcriptional_regulation_by_tp53	328	0.0479167	0.856458
naba proteoglycans	31	0.0290135	0.741869	biocarta sam68 pathway	6	0.0171756	0.244241	boquest stem cell up	238	0.0142566	0.150265					farmer_breast_cancer_cluster_3	15	0.0481172	0.85071
reactome yap1 and wwtr1 taz stimulated gene expression	14	0.0254902	0.74518	reactome phosphorylation of the apc c	19	0.0383877	0.245578	urs adipocyte differentiation dn	30	0.0142566	0.149367					reactome_rab_gefs_exchange_gtp_for_gdp_on_rabs	82	0.0371134	0.837788
reactome rho gtpases activate paks	20	0.0429185	0.738051	caffarel response to thc 24hr 3 dn	12	0.0306122	0.244762	ferrando t all with mll enl fusion up	81	0.0238095	0.148481					shin_b_cell_lymphoma_cluster_7	26	0.0438247	0.832537
setlur prostate cancer tmprss2 erg fusion dn	19	0.00591716	0.734534	changolkar h2afy targets up	45	0.0438597	0.245193	hoebeke lymphoid stem cell up	85	0.0118577	0.147544					karlsson_tgfb1_targets_dn	184	0.045738	0.830818
reactome signaling by ntrks	98	0.0212314	0.74025	cheok response to mercaptopurine up	12	0.0247934	0.244568	dacosta uv response via ercc3 ttd up	53	0.0231092	0.146784					pid_ceramide_pathway	43	0.0462185	0.83228
faelt b cll with vh rearrangements up	44	0.0303644	0.742045	reactome mismatch repair	15	0.036	0.245938	brown myeloid cell development dn	113	0.006	0.145806					sansom_apc_targets_up	116	0.0408163	0.809683
casorelli apl secondary vs de novo up	33	0.0410678	0.739878	zerbini response to sulindac dn	6	0.00595238	0.247111	lim mammary stem cell up	433	0.0145228	0.145649					rahman_tp53_targets_phosphorylated	19	0.0480962	0.798324
ebauer targets of pax3 foxo1 fusion dn	47	0.0184049	0.735444	pid atm pathway	31	0.0357143	0.247589	zhang targets of ewsr1 fli1 fusion	84	0.010661	0.146697					biocarta_mapk_pathway	79	0.0480349	0.782739
reactome abacavir transport and metabolism	10	0.0220441	0.72814	lopez mesotelioma survival time up	12	0.0316832	0.247984	huang gata2 targets up	138	0.0147368	0.14763					kyng_werner_syndrom_and_normal_aging_dn	179	0.0443975	0.767544
reactome regulation of fzd by ubiquitination	20	0.0390144	0.724181	minguez liver cancer vascular invasion up	12	0.0390947	0.247319	sweet kras targets up	71	0.0189873	0.147674					reactome_nuclear_events_kinase_and_transcription_factor_activation	24	0.0454545	0.76747
cervera sdhb targets 1 dn	34	0.00763359	0.721672	gutierrez multiple myeloma up	30	0.0317757	0.247689	haddad t lymphocyte and nk progenitor up	76	0.00201613	0.147499					sato_silenced_by_methylation_in_pancreatic_cancer_2	42	0.0318471	0.763742
smid breast cancer luminal a up	76	0.0246407	0.723548	biocarta dnafragment pathway	10	0.0421053	0.249529	ouellet cultured ovarian cancer invasive vs lmp up	66	0.0240175	0.147372					gentles_leukemic_stem_cell_dn	16	0.0383142	0.756524
parent mtor signaling dn	40	0.0307377	0.711384					yagi aml with t 8 21 translocation	344	0.0143443	0.1465					kegg_o_glycan_biosynthesis	29	0.0489796	0.754339
mahadevan imatinib resistance up	17	0.0231092	0.705301					benporath oct4 targets	270	0.00816326	0.146125					wang_lsd1_targets_dn	34	0.0480962	0.752744
biocarta alk pathway	36	0.0229446	0.704702					kegg vascular smooth muscle contraction	109	0.00384615	0.14556					biocarta_ptdins_pathway	23	0.0404255	0.739403
su liver	52	0.00684931	0.706801					bandres response to carmustin without mgmt 48hr dn	27	0	0.145234					valk_aml_cluster_16	26	0.0425532	0.740064
chiang liver cancer subclass proliferation dn	167	0.0149533	0.702981					schlosser serum response up	115	0.0270793	0.144871					liao_metastasis	496	0.043659	0.739161
reactome biological oxidations	194	0.00552486	0.702036					lee aging neocortex up	74	0.0184426	0.14415					ivanova_hematopoiesis_early_progenitor	396	0.0314465	0.732036
reactome complement cascade	55	0.0338983	0.702744					tonks targets of runx1 runx1t1 fusion hsc up	173	0.0124481	0.14581					le_neuronal_differentiation_up	18	0.0391753	0.7286
boyault liver cancer subclass g123 dn	46	0.0438247	0.701929					nadler hyperglycemia at obesity	52	0.0161616	0.145304					reactome_metabolism_of_carbohydrates	277	0.035124	0.725478
newman ercc6 targets dn	34	0.0288462	0.698325					kyng dna damage by 4nqo	30	0.00406504	0.14489					smid_breast_cancer_relapse_in_pleura_dn	24	0.0472279	0.726507
zhan multiple myeloma dn	39	0.0444444	0.694775					chiang liver cancer subclass interferon dn	50	0.00413223	0.14481
reactome ca dependent events	35	0.0390947	0.694533					hollern emt breast tumor up	126	0.0144928	0.144174
verhaak aml with npm1 mutated dn	233	0.0438413	0.700162					rodwell aging kidney no blood up	192	0.0172043	0.143364
reactome elevation of cytosolic ca2plus levels	16	0.0294695	0.696528					natsume response to interferon beta dn	46	0.0124481	0.142501
hoque methylated in cancer	51	0.0375	0.696892					reactome formation of the early elongation complex	30	0.0102881	0.141839
smid breast cancer normal like up	418	0.0350515	0.696413					iwanaga carcinogenesis by kras dn	111	0.00952381	0.141189
reactome common pathway of fibrin clot formation	21	0.0157343	0.693805					coulouarn temporal tgfb1 signature dn	126	0.00976562	0.14036
maina vhl targets up	7	0.0452675	0.692348					browne hcmv infection 10hr dn	51	0.00203666	0.139797
reactome g protein mediated events	50	0.0343434	0.690834					pid bmp pathway	41	0.0141414	0.14438
reactome elastic fibre formation	42	0.0419162	0.692518					joseph response to sodium butyrate dn	58	0.0141129	0.144948
reactome n glycan antennae elongation in the medial trans golgi	26	0.0201207	0.688937					zhan multiple myeloma dn	39	0.00206186	0.145559
reactome cyp2e1 reactions	9	0.013834	0.681639					ross aml with pml rara fusion	76	0.0171674	0.145292
reactome activation of trka receptors	6	0.00211864	0.679114					elvidge hif1a and hif2a targets dn	97	0.0186722	0.145608
alcalay aml by npm1 localization up	116	0.0368852	0.683237					izadpanah stem cell adipose vs bone dn	103	0.015625	0.144899
kayo calorie restriction muscle up	90	0.0486381	0.681279					reactome g protein mediated events	50	0	0.144226
mikkelsen mcv6 icp with h3k27me3	70	0.0056926	0.682695					bystrykh hematopoiesis stem cell and brain qtl trans	148	0.017341	0.143963
ichiba graft versus host disease 35d dn	53	0.0411215	0.676421					hillion hmga1 targets	75	0.00387597	0.143158
nikolsky breast cancer 17p11 amplicon	10	0.0432099	0.670788					murakami uv response 6hr up	29	0.0102669	0.144329
kegg steroid hormone biosynthesis	45	0.0165441	0.66738					sesto response to uv c6	36	0.0196937	0.143556
reactome stimuli sensing channels	103	0.015748	0.66475					le egr2 targets dn	96	0.0040568	0.143966
biocarta ghrelin pathway	12	0.037594	0.662952					gazda diamond blackfan anemia erythroid dn	414	0.00197628	0.144216
reactome sodium calcium exchangers	11	0.0434783	0.660154					smith tert targets dn	82	0.0279441	0.143458
reactome netrin 1 signaling	49	0.0323232	0.660031					kondo prostate cancer hcp with h3k27me3	84	0.00203252	0.144693
reactome lgi adam interactions	14	0.0254902	0.66567					li induced t to natural killer dn	131	0.00598802	0.144081
kegg complement and coagulation cascades	68	0.0305755	0.663683					onder cdh1 targets 2 up	237	0.0106383	0.143688
kyng dna damage by 4nqo	30	0.0492813	0.660413					ingram shh targets up	113	0.00992064	0.143374
riz erythroid differentiation 12hr	33	0.0383795	0.658208					ambrosini flavopiridol treatment tp53	96	0.00594059	0.144271
biocarta extrinsic pathway	13	0.005	0.65624					hollmann apoptosis via cd40 up	180	0.00829876	0.143864
reactome molecules associated with elastic fibres	35	0.0443548	0.65372					reactome glycogen metabolism	26	0.0141988	0.14642
reactome activated ntrk2 signals through frs2 and frs3	11	0.0357143	0.653735					coates macrophage m1 vs m2 up	76	0.00826446	0.146093
cairo liver development dn	199	0.0294659	0.655485					reactome signaling by wnt	294	0.00968992	0.145827
liu prostate cancer dn	451	0.04	0.653757					kim liver cancer poor survival up	21	0.0172786	0.145287
rizki tumor invasiveness 2d dn	55	0.0376984	0.654385					faelt b cll with vh rearrangements up	44	0.0140281	0.144548
reactome endogenous sterols	25	0.0289017	0.651495					martin viral gpcr signaling dn	46	0.00716846	0.145814
delys thyroid cancer dn	215	0.0285714	0.648451					ross aml with aml1 eto fusion	75	0.0144928	0.145422
biocarta plateletapp pathway	14	0.0231214	0.648977					jaatinen hematopoietic stem cell up	283	0.00406504	0.144933
reactome g protein gated potassium channels	22	0.0218688	0.646925					nadler obesity up	54	0.026971	0.144729
weng por dosage	21	0.0410959	0.646436					gaussmann mll af4 fusion targets c up	152	0.0020284	0.144049
reactome inwardly rectifying kplus channels	28	0.020202	0.644616					gaussmann mll af4 fusion targets f up	165	0.0206612	0.145642
reactome reelin signalling pathway	5	0.0349076	0.641583					reactome eph ephrin mediated repulsion of cells	49	0.00821355	0.144942
kegg asthma	27	0.0352941	0.648555					kokkinakis methionine deprivation 96hr up	112	0.0189076	0.145719
reactome dag and ip3 signaling	39	0.0327198	0.648362					mcbryan pubertal breast 5 6wk dn	118	0.00566038	0.146058
ji carcinogenesis by kras and stk11 dn	16	0.0491803	0.646599					landis erbb2 breast tumors 324 dn	134	0.0339321	0.145531
molenaar targets of ccnd1 and cdk4 up	58	0.0483193	0.642691					reactome er to golgi anterograde transport	146	0.00395257	0.145209
reactome ion homeostasis	52	0.0382409	0.641458					smid breast cancer luminal a up	76	0.0039604	0.145876
boyault liver cancer subclass g56 up	10	0.0387931	0.640073					thum systolic heart failure up	389	0.0302419	0.145527
reactome ion transport by p type atpases	52	0.0236686	0.63798					azare neoplastic transformation by stat3 up	120	0.0210526	0.14537
reactome shc1 events in erbb2 signaling	22	0.0452675	0.628269					lee metastasis and alternative splicing up	69	0.0141129	0.145461
shedden lung cancer good survival a12	256	0.019802	0.624677					acevedo liver cancer dn	490	0.0110906	0.145753
reactome cd22 mediated bcr regulation	5	0.0122951	0.621449					lim mammary luminal mature dn	91	0.0162272	0.14563
reactome role of lat2 ntal lab on calcium mobilization	16	0.04375	0.616433					ji response to fsh up	55	0.0177866	0.145212
hsiao liver specific genes	233	0.00851789	0.616613					pid anthrax pathway	17	0.008	0.145469
kegg arachidonic acid metabolism	55	0.0132576	0.616229					pilon klf1 targets up	450	0.00184502	0.146444
reactome hemostasis	570	0.0322581	0.615273					yamazaki tceb3 targets up	152	0.0217822	0.146028
kaposi liver cancer met dn	5	0.0315789	0.612316					reactome other interleukin signaling	272	0.0132576	0.145794
ouellet ovarian cancer invasive vs lmp dn	12	0.0497925	0.610361					biocarta alk pathway	36	0.00900901	0.145798
reactome glucagon signaling in metabolic regulation	29	0.0458167	0.606973					vecchi gastric cancer early dn	320	0.00197628	0.14553
mori small pre bii lymphocyte up	69	0.0443548	0.601876					zhou tnf signaling 4hr	49	0.0330578	0.145216
grabarczyk bcl11b targets dn	55	0.0352697	0.601576					reactome formation of hiv elongation complex in the absence of hiv tat	38	0.0103306	0.14582
pid thrombin par4 pathway	15	0.0485612	0.604472					zhan multiple myeloma ms up	45	0.010352	0.145615
vecchi gastric cancer early dn	320	0.0363636	0.605179					wnt signaling	85	0.0116505	0.14498
servitja islet hnf1a targets dn	95	0.0093633	0.604178					pangas tumor suppression by smad1 and smad5 up	120	0.0224033	0.144384
eppert ce hsc lsc	34	0.0465116	0.606355					delacroix rarg bound mef	336	0.0347648	0.144875
vart kshv infection angiogenic markers dn	123	0.026749	0.604563					durand stroma s up	279	0.0100402	0.14465
reactome phase 0 rapid depolarisation	42	0.0412574	0.599358					verrecchia early response to tgfb1	47	0.0371901	0.145217
lein midbrain markers	81	0.0287908	0.597989					bacolod resistance to alkylating agents up	21	0.00614754	0.145144
reactome axon guidance	518	0.0409836	0.599089					hoebeke lymphoid stem cell dn	84	0.0425101	0.144578
reactome incretin synthesis secretion and inactivation	20	0.0399306	0.596013					kegg insulin signaling pathway	134	0.00531915	0.144588
reactome signaling by ras mutants	58	0.0405644	0.594033					reactome disassembly of the destruction complex and recruitment of axin to the membrane	30	0.00970874	0.144225
reactome platelet homeostasis	79	0.044898	0.59345					mariadason regulated by histone acetylation up	56	0.0159363	0.143866
reactome bile acid and bile salt metabolism	39	0.0398551	0.592349					kegg melanogenesis	101	0.00386847	0.14338
reactome pi3k events in erbb4 signaling	10	0.0169851	0.590871					miyagawa targets of ewsr1 ets fusions up	249	0.0142857	0.143651
kegg ppar signaling pathway	65	0.0442478	0.592219					reactome inositol phosphate metabolism	48	0.00196464	0.143365
guenther growth spherical vs adherent up	14	0.0429185	0.59194					schaeffer prostate development 48hr dn	378	0.00811359	0.143026
kondo prostate cancer hcp with h3k27me3	84	0.0284553	0.590462					casorelli acute promyelocytic leukemia up	148	0.00843882	0.143778
terao aox4 targets hg up	25	0.0313152	0.589005					ruiz tnc targets up	138	0.0125523	0.143271
wang thoc1 targets dn	19	0.0382294	0.587106					reactome cellular response to hypoxia	66	0.0257937	0.143025
reactome signaling by ntrk2 trkb	25	0.029106	0.584488					schaeffer prostate development 48hr up	399	0.00992064	0.14284
mikkelsen ips icp with h3k27me3	47	0.0205607	0.582743					han satb1 targets dn	354	0.0204918	0.142372
mccabe bound by hoxc6	387	0.0173745	0.580847					davicioni molecular arms vs erms up	318	0.00201613	0.142178
takayama bound by ar	10	0.0430328	0.577					wong endmetrium cancer dn	67	0.0120724	0.142197
reactome activated ntrk2 signals through fyn	7	0.0214008	0.578829					senese hdac1 and hdac2 targets dn	206	0.010395	0.141893
lee liver cancer e2f1 dn	63	0.0363636	0.577372					kegg primary bile acid biosynthesis	15	0	0.142758
mikkelsen es hcp with h3k27me3	29	0.00984252	0.573593					villanueva liver cancer krt19 dn	63	0.00371058	0.142553
lee liver cancer survival up	169	0.0162162	0.571685					reactome smooth muscle contraction	35	0.0205607	0.142107
biocarta acetaminophen pathway	5	0.0220441	0.572845					kegg adipocytokine signaling pathway	64	0.00943396	0.143243
rankin angiogenic targets of vhl hif2a dn	8	0.0402299	0.571351					schaeffer prostate development 12hr dn	41	0.00601202	0.143204
woo liver cancer recurrence dn	75	0.0462107	0.567658					pid ps1 pathway	44	0.00785855	0.143421
seki inflammatory response lps dn	20	0.0496894	0.563219					reactome diseases of signal transduction	370	0.00761905	0.142928
reactome arachidonic acid metabolism	54	0.0338645	0.560745					li wilms tumor	25	0.00391389	0.143992
biocarta pelp1 pathway	6	0.0487805	0.563064					gryder pax3foxo1 enhancers ko down	420	0.00402414	0.143709
lucas hnf4a targets dn	7	0.0449898	0.560099					schaeffer prostate development 6hr up	142	0.0123711	0.144692
reactome transport of organic anions	11	0.0305927	0.558676					korkola yolk sac tumor up	17	0.0283401	0.1444
reactome notch3 intracellular domain regulates transcription	24	0.0487288	0.557431					gargalovic response to oxidized phospholipids blue dn	55	0.00406504	0.143876
reactome neurotoxicity of clostridium toxins	9	0.0318091	0.557837					udayakumar med1 targets dn	221	0.0183299	0.14355
reactome class b 2 secretin family receptors	84	0.035503	0.559685					zhan multiple myeloma cd1 vs cd2 dn	49	0.0139442	0.143057
croonquist stromal stimulation dn	12	0.0466102	0.55852					seki inflammatory response lps dn	20	0.00411523	0.142825
sabates colorectal adenoma dn	262	0.0389344	0.556885					reactome cooperation of pdcl phlp1 and tric cct in g protein beta folding	36	0.026465	0.142537
biocarta cytokine pathway	16	0.0371747	0.556631					reactome integration of energy metabolism	102	0.00184162	0.142005
kondo hypoxia	6	0.0387755	0.55583					reactome detoxification of reactive oxygen species	32	0.0171756	0.141856
reactome visual phototransduction	94	0.0223464	0.553925					rampon enriched learning environment late up	19	0.0273109	0.142563
reactome biosynthesis of maresin like spms	6	0.0309654	0.554039					mishra carcinoma associated fibroblast dn	23	0.021322	0.14216
kegg dilated cardiomyopathy	88	0.0435606	0.556167					chiaretti acute lymphoblastic leukemia zap70	61	0.0245399	0.142206
biocarta intrinsic pathway	23	0.0259067	0.555324					acosta proliferation independent myc targets dn	106	0.012474	0.141703
biocarta fibrinolysis pathway	12	0.0209059	0.554889					riggi ewing sarcoma progenitor up	407	0.00817996	0.141863
gaussmann mll af4 fusion targets a dn	86	0.0364372	0.556508					pid avb3 integrin pathway	72	0.0225873	0.141538
reactome abacavir transmembrane transport	5	0.017094	0.548254					sagiv cd24 targets up	19	0.00203666	0.141236
reactome neurotransmitter receptors and postsynaptic signal transmission	194	0.0478012	0.541304					papaspyridonos unstable aterosclerotic plaque dn	39	0.0348361	0.140749
meissner npc icp with h3 unmethylated	19	0.0350877	0.539753					jiang aging hypothalamus dn	34	0.0242424	0.142456
bruneau septation atrial	5	0.0399274	0.543474					mullighan mll signature 1 dn	219	0.0222672	0.142331
su pancreas	40	0.039924	0.542145					reactome mapk family signaling cascades	279	0.0152091	0.142076
kondo prostate cancer with h3k27me3	175	0.0191638	0.543678					zheng glioblastoma plasticity dn	52	0.0180723	0.141785
meissner npc hcp with h3k27me3	70	0.0246679	0.542651					lein oligodendrocyte markers	66	0.00596422	0.141269
reactome regulation of beta cell development	40	0.0411449	0.544037					iwanaga carcinogenesis by kras pten dn	319	0.0136187	0.140879
madan dppa4 targets	49	0.0479846	0.53876					boyault liver cancer subclass g123 dn	46	0.0019084	0.141773
camps colon cancer copy number dn	56	0.0402194	0.537272					reactome signaling by ras mutants	58	0.00727273	0.141478
ouellet cultured ovarian cancer invasive vs lmp dn	30	0.0391061	0.537038					rutella response to csf2rb and il4 dn	297	0.0270833	0.141089
servitja liver hnf1a targets dn	153	0.0326087	0.538899					sweet lung cancer kras dn	367	0.0261569	0.140893
kegg gnrh signaling pathway	99	0.0481696	0.53862					fournier acinar development early up	18	0.0123711	0.141502
reactome acrosome reaction and sperm:oocyte membrane binding	4	0.0302457	0.543204					wamunyokoli ovarian cancer grades 1 2 dn	67	0.0226804	0.141053
wunder inflammatory response and cholesterol dn	8	0.045	0.539006					yao hoxa10 targets via progesterone up	73	0.0138614	0.140804
reactome regulation of pten localization	8	0.0314342	0.540962					berenjeno transformed by rhoa forever up	17	0.0181818	0.140765
reactome metabolism of steroids	142	0.0469043	0.540488					willert wnt signaling	20	0.00851064	0.140465
reactome ntrk2 activates rac1	5	0.026	0.540222					galluzzi prevent mitochondial permeabilization	23	0.0225873	0.140709
reactome extrinsic pathway of fibrin clot formation	5	0.0419847	0.536943					kegg basal cell carcinoma	55	0.00404858	0.140306
mikkelsen mef icp with h3k27me3	178	0.023766	0.535597					wang smarce1 targets up	267	0.0164271	0.140011
naba matrisome	938	0.046875	0.532411					hoshida liver cancer survival up	69	0.0126316	0.139604
mikkelsen mcv6 lcp with h3k27me3	24	0.0423012	0.537913					aston major depressive disorder up	43	0.0163934	0.139379
reactome glucocorticoid biosynthesis	9	0.0498008	0.541712					acevedo liver tumor vs normal adjacent tissue dn	244	0.00756144	0.139229
yoshimura mapk8 targets up	1094	0.0490566	0.544261					zhan multiple myeloma hp dn	43	0.00867679	0.139362
								delys thyroid cancer dn	215	0.00819672	0.138939
								laiho colorectal cancer serrated up	105	0.0315315	0.138679
								nikolsky breast cancer 6p24 p22 amplicon	21	0.00821355	0.138331
								mattioli multiple myeloma with 14q32 translocations	32	0.0282828	0.137928
								pid angiopoietin receptor pathway	49	0.0177515	0.137593
								reactome interaction between l1 and ankyrins	29	0.00206186	0.137149
								pid ecadherin stabilization pathway	38	0.0153551	0.138235
								tcga glioblastoma copy number up	67	0.01222	0.138029
								croonquist stromal stimulation up	52	0.0326531	0.138388
								boylan multiple myeloma d dn	70	0.0163934	0.1387
								figueroa aml methylation cluster 6 up	121	0.00401606	0.138617
								zhu cmv 8 hr dn	48	0.0246914	0.138185
								reactome g alpha 12 13 signalling events	76	0.0059761	0.137916
								fujii ybx1 targets up	38	0.0083682	0.137609
								reactome glucagon like peptide 1 glp1 regulates insulin secretion	39	0.00760456	0.137413
								davicioni molecular arms vs erms dn	166	0.0205761	0.137169
								fridman immortalization dn	29	0.0309917	0.137082
								chang immortalized by hpv31 up	66	0.0114943	0.136709
								ding lung cancer by mutation rate	19	0	0.136896
								pid rxr vdr pathway	26	0.00806452	0.136583
								kegg mapk signaling pathway	259	0.0149813	0.136621
								charafe breast cancer luminal vs mesenchymal dn	432	0.031185	0.136205
								reactome signaling by vegf	102	0.00823045	0.136148
								reactome signaling by notch2	31	0.0102249	0.136326
								zhan multiple myeloma cd1 dn	42	0.00421053	0.135961
								durand stroma ns up	157	0.00414079	0.135573
								zhu cmv 24 hr dn	81	0.0243902	0.135656
								lopes methylated in colon cancer dn	28	0.00204082	0.135421
								wikman asbestos lung cancer up	16	0.0224949	0.135094
								reactome platelet aggregation plug formation	38	0.00690846	0.134711
								ebauer targets of pax3 foxo1 fusion dn	47	0.00409836	0.134768
								hollern adenomyoepithelial breast tumor	15	0.019305	0.134635
								landemaine lung metastasis	20	0.004158	0.13524
								kim hypoxia	18	0.0258449	0.135586
								yao temporal response to progesterone cluster 0	66	0.0182556	0.135188
								reactome adherens junctions interactions	27	0.00579151	0.135277
								park apl pathogenesis dn	47	0.0381356	0.135179
								reactome mrna capping	27	0.010395	0.135278
								roylance breast cancer 16q copy number dn	24	0.00580271	0.134938
								shedden lung cancer good survival a4	184	0.00990099	0.134729
								blalock alzheimers disease incipient up	358	0.02	0.134894
								kyng dna damage by 4nqo or uv	55	0.0100604	0.134654
								lindgren bladder cancer cluster 2b	354	0.0329897	0.134632
								gajate response to trabectedin up	60	0.0264766	0.134764
								nam fxyd5 targets dn	16	0.0271399	0.134632
								liu prostate cancer dn	451	0.0342742	0.13451
								karlsson tgfb1 targets dn	184	0.0126582	0.134864
								reactome degradation of gli1 by the proteasome	53	0.0447761	0.134499
								yordy reciprocal regulation by ets1 and sp100 up	19	0.0131868	0.134931
								kegg fc epsilon ri signaling pathway	77	0.0117188	0.135401
								reactome ion channel transport	177	0.0019084	0.135043
								li wilms tumor vs fetal kidney 2 dn	45	0.0147368	0.135345
								basso cd40 signaling dn	65	0.0177165	0.135398
								yagi aml with 11q23 rearranged	319	0.0181818	0.135036
								wamunyokoli ovarian cancer lmp dn	180	0.0165631	0.135082
								martinez response to trabectedin up	62	0.0451613	0.135616
								reactome gaba b receptor activation	35	0.00575816	0.135504
								stambolsky response to vitamin d3 up	76	0.0125523	0.13518
								weigel oxidative stress response	33	0.0362473	0.135518
								elvidge hypoxia up	158	0.0291667	0.135342
								verhaak glioblastoma proneural	162	0.00398406	0.134996
								reactome asparagine n linked glycosylation	290	0.00804829	0.134891
								valk aml cluster 10	29	0.0207039	0.134642
								alonso metastasis neural up	16	0.0153846	0.134424
								wang metastasis of breast cancer esr1 dn	28	0.00795229	0.134542
								lee neural crest stem cell up	137	0.0232558	0.134876
								teramoto opn targets cluster 6	25	0.0421687	0.134628
								reactome trafficking of glur2 containing ampa receptors	17	0.0198807	0.134307
								reactome metabolism of nitric oxide: enos activation and regulation	15	0.0170213	0.135689
								reactome signaling by retinoic acid	41	0.0190476	0.135592
								piccaluga angioimmunoblastic lymphoma up	189	0.0454545	0.135421
								zamora nos2 targets dn	76	0.0371057	0.135196
								rodrigues thyroid carcinoma anaplastic dn	475	0.0245902	0.134889
								martens bound by pml rara fusion	409	0.0286299	0.135141
								kasler hdac7 targets 1 up	176	0.0289855	0.135335
								lui thyroid cancer cluster 1	46	0.0187891	0.13502
								burton adipogenesis peak at 0hr	49	0.0310559	0.135475
								reactome netrin 1 signaling	49	0.0118812	0.135615
								dawson methylated in lymphoma tcl1	53	0.00587084	0.135517
								valk aml cluster 11	36	0.0207039	0.135789
								pid il3 pathway	25	0.0156556	0.135987
								jiang hypoxia normal	189	0.0169492	0.137976
								shepard crush and burn mutant up	187	0.0391753	0.137742
								tonks targets of runx1 runx1t1 fusion monocyte up	185	0.0421053	0.13747
								kyng dna damage up	200	0.0160321	0.137198
								tanaka methylated in esophageal carcinoma	97	0.00176678	0.137514
								berenjeno rock signaling not via rhoa dn	47	0.026749	0.137656
								dasu il6 signaling scar up	31	0.0317125	0.13819
								greshock cancer copy number up	308	0.0116959	0.138427
								steger adipogenesis dn	22	0.014433	0.138318
								chiba response to tsa up	45	0.026749	0.138107
								kegg glycosaminoglycan biosynthesis chondroitin sulfate	22	0.00412371	0.137768
								baelde diabetic nephropathy up	80	0.0321285	0.138298
								barrier colon cancer recurrence dn	17	0.0278373	0.138098
								sana tnf signaling dn	76	0.0271399	0.137829
								kegg tgf beta signaling pathway	82	0.0182556	0.137583
								ray tumorigenesis by erbb2 cdc25a dn	237	0.0175439	0.13805
								sa pten pathway	17	0.00608519	0.137719
								reactome nuclear signaling by erbb4	31	0.0152672	0.138408
								reactome toll like receptor cascades	146	0.0179641	0.138412
								horiuchi wtap targets up	279	0.022541	0.138191
								hooi st7 targets up	87	0.0180361	0.137856
								cervera sdhb targets 2	103	0.00808081	0.13784
								samols targets of khsv mirnas dn	53	0.0169133	0.13785
								biocarta shh pathway	16	0.014	0.137665
								reactome ra biosynthesis pathway	21	0.015625	0.13741
								reactome a tetrasaccharide linker sequence is required for gag synthesis	26	0.00204499	0.137345
								tseng adipogenic potential dn	45	0.0220441	0.137081
								reactome abc family proteins mediated transport	96	0.0119522	0.136873
								plasari nfic targets basal up	27	0.0100806	0.136638
								reactome synthesis of ip3 and ip4 in the cytosol	26	0.0157791	0.13655
								darwiche skin tumor promoter up	123	0.0345489	0.136469
								elvidge hypoxia by dmog up	127	0.033195	0.136195
								nikolsky breast cancer 12q24 amplicon	15	0.0360169	0.135942
								liu vav3 prostate carcinogenesis dn	16	0.0165746	0.135979
								reactome defective b4galt7 causes eds progeroid type	20	0.00601202	0.136233
								reactome elastic fibre formation	42	0.0251046	0.136011
								mcgarvey silenced by methylation in colon cancer	39	0.00559702	0.135693
								gaussmann mll af4 fusion targets e up	87	0.0140845	0.135681
								reactome molecules associated with elastic fibres	35	0.02079	0.135457
								chandran metastasis top50 dn	38	0.0364026	0.135957
								barrier cancer relapse normal sample up	32	0.00621118	0.135894
								wierenga pml interactome	40	0.0326087	0.135678
								chen lvad support of failing heart dn	39	0.0123711	0.135401
								lindgren bladder cancer high recurrence	42	0.0360169	0.135104
								bertucci invasive carcinoma ductal vs lobular dn	42	0.0177165	0.135106
								sheth liver cancer vs txnip loss pam2	155	0.0210084	0.135005
								bystrykh hematopoiesis stem cell qtl cis	115	0.0286299	0.134704
								eppert ce hsc lsc	34	0.00811359	0.134567
								cromer metastasis up	70	0.0184426	0.134699
								perez tp53 and tp63 targets	183	0.00994036	0.134738
								reactome copi mediated anterograde transport	95	0.0154739	0.134648
								chebotaev gr targets dn	108	0.0101626	0.134577
								varela zmpste24 targets dn	38	0.00769231	0.134421
								mullighan mll signature 1 up	336	0.0491803	0.134134
								kegg focal adhesion	193	0.037037	0.133873
								wu cell migration	165	0.0286885	0.13368
								reactome ion homeostasis	52	0.0170455	0.135046
								lee liver cancer e2f1 dn	63	0.00183486	0.134916
								ivanova hematopoiesis stem cell long term	189	0.00574713	0.134627
								reactome sema3a pak dependent axon repulsion	16	0.0145833	0.134386
								browne hcmv infection 30min up	48	0.00384615	0.134329
								pid hif1 tfpathway	66	0.0306122	0.134347
								dang regulated by myc dn	232	0.0497925	0.134119
								parent mtor signaling dn	40	0.0179283	0.134037
								lui thyroid cancer cluster 2	42	0.0254237	0.133863
								wierenga stat5a targets dn	175	0.014553	0.135548
								reactome sumoylation of intracellular receptors	30	0.0116279	0.136025
								pid syndecan 3 pathway	16	0.043222	0.135836
								sig bcr signaling pathway	46	0.0283976	0.136632
								valk aml with flt3 itd	31	0.0138067	0.136564
								reactome regulation of insulin secretion	74	0.00184502	0.136586
								raghavachari platelet specific genes	64	0.0436508	0.136602
								reactome bile acid and bile salt metabolism	39	0.0113208	0.136333
								charafe breast cancer luminal vs basal dn	418	0.033195	0.136726
								riz erythroid differentiation 12hr	33	0.0229008	0.136597
								ross acute myeloid leukemia cbf	78	0.0327869	0.136563
								plasari tgfb1 signaling via nfic 1hr dn	98	0.00417537	0.136775
								winter hypoxia metagene	229	0.0348361	0.136608
								kim all disorders oligodendrocyte number corr dn	33	0	0.136729
								gotzmann epithelial to mesenchymal transition dn	188	0.0470348	0.136568
								chebotaev gr targets up	71	0.00209205	0.136728
								colin pilocytic astrocytoma vs glioblastoma up	32	0.027027	0.136607
								figueroa aml methylation cluster 7 up	98	0.0178926	0.136398
								weston vegfa targets 6hr	49	0.0263158	0.136971
								casorelli apl secondary vs de novo up	33	0.0138067	0.136743
								mody hippocampus neonatal	31	0.0421687	0.136653
								mcbryan pubertal breast 3 4wk up	191	0.0276134	0.136933
								zwang egf interval dn	181	0.027668	0.136689
								klein primary effusion lymphoma up	48	0.0338266	0.136505
								lein pons markers	89	0.00938086	0.136569
								reactome glucagon signaling in metabolic regulation	29	0.0245747	0.136392
								hirsch cellular transformation signature dn	92	0.0305499	0.136106
								bredemeyer rag signaling not via atm dn	53	0.0152091	0.136259
								pos histamine response network	31	0.0326923	0.135801
								reactome diseases of glycosylation	136	0.016129	0.136306
								concannon apoptosis by epoxomicin up	229	0.0420168	0.136405
								pid ephrinb rev pathway	30	0.0125448	0.136478
								biocarta p53hypoxia pathway	21	0.0473251	0.137243
								wang esophagus cancer vs normal dn	96	0.0235043	0.137118
								xu gh1 autocrine targets up	165	0.00735294	0.137261
								biocarta pgc1a pathway	15	0.0242915	0.137202
								pid arf6 trafficking pathway	49	0.0215686	0.136926
								dacosta ercc3 allele xpcs vs ttd dn	32	0.0233546	0.137847
								kegg o glycan biosynthesis	29	0.00826446	0.137643
								rodrigues ntn1 targets dn	147	0.0204082	0.137799
								gargalovic response to oxidized phospholipids red dn	24	0.0158103	0.137731
								heidenblad amplicon 12p11 12 up	33	0.0221774	0.137687
								gentile uv low dose dn	62	0.0265306	0.137426
								vanharanta uterine fibroid dn	63	0.04	0.13716
								astier integrin signaling	53	0.043222	0.137005
								mahajan response to il1a dn	68	0.0240481	0.136878
								magrangeas multiple myeloma igg vs iga up	17	0.0227704	0.136867
								baris thyroid cancer dn	54	0.0456349	0.137451
								reactome integrin signaling	27	0.0192644	0.137175
								kim myc amplification targets up	188	0.00831601	0.137362
								reactome chaperone mediated autophagy	16	0.0448598	0.137664
								reactome nrage signals death through jnk	58	0.030303	0.13749
								kegg arrhythmogenic right ventricular cardiomyopathy arvc	74	0.0156556	0.137614
								chen hoxa5 targets 9hr dn	35	0.0386179	0.137523
								tomlins prostate cancer dn	38	0.0223577	0.137151
								verhaak aml with npm1 mutated dn	233	0.0310559	0.136887
								nakayama soft tissue tumors pca2 dn	73	0.0177515	0.136618
								grade colon and rectal cancer dn	92	0.01417	0.137372
								mili pseudopodia chemotaxis up	72	0.0163265	0.137882
								lee liver cancer myc tgfa up	58	0.0199601	0.137849
								tonks targets of runx1 runx1t1 fusion erythrocyte up	146	0.0248963	0.137579
								yao temporal response to progesterone cluster 6	67	0.0320641	0.137426
								weston vegfa targets 12hr	25	0.0217822	0.137252
								reactome rap1 signalling	16	0.0253411	0.137306
								boquest stem cell cultured vs fresh up	400	0.027957	0.137351
								darwiche squamous cell carcinoma dn	152	0.0280374	0.137487
								tarte plasma cell vs plasmablast up	363	0.0286807	0.137396
								kokkinakis methionine deprivation 48hr dn	58	0.0393375	0.137196
								matzuk embryonic germ cell	20	0.00803213	0.13706
								verrecchia response to tgfb1 c1	17	0.0429448	0.137575
								charafe breast cancer basal vs mesenchymal dn	49	0.0254777	0.137996
								huang foxa2 targets dn	36	0.0349076	0.138571
								hoffmann large to small pre bii lymphocyte dn	60	0.0237624	0.138396
								reactome platelet homeostasis	79	0.0248092	0.138637
								torchia targets of ewsr1 fli1 fusion dn	291	0.0220441	0.138379
								reactome signaling by erbb4	56	0.0267176	0.138321
								yoshimura mapk8 targets dn	326	0.0215686	0.138239
								reactome rho gtpases activate nadph oxidases	23	0.0208333	0.13837
								abe inner ear	39	0.0247423	0.138162
								reactome phase i functionalization of compounds	98	0.00746269	0.137957
								browne hcmv infection 18hr up	155	0.0121704	0.137964
								reactome cell death signalling via nrage nrif and nade	72	0.0248447	0.137924
								kegg lysine degradation	39	0.0121951	0.13788
								figueroa aml methylation cluster 2 up	50	0.00381679	0.137886
								reactome signal transduction by l1	21	0.0265849	0.137867
								schraets mll targets up	28	0.0167015	0.1378
								hoshida liver cancer late recurrence up	56	0.0425101	0.137634
								reactome gaba receptor activation	52	0.00181159	0.137778
								tuomisto tumor suppression by col13a1 up	17	0.0123203	0.137552
								reactome glycosphingolipid metabolism	44	0.0160966	0.137391
								engelmann cancer progenitors dn	61	0.0188679	0.13735
								petrova prox1 targets dn	53	0.0423729	0.137487
								pid ras pathway	29	0.0121457	0.137378
								schaeffer prostate development 12hr up	104	0.0366599	0.137241
								chiaradonna neoplastic transformation kras cdc25 dn	45	0.0352697	0.137026
								frasor response to estradiol dn	71	0.0360169	0.137411
								plasari tgfb1 signaling via nfic 10hr dn	24	0.0281125	0.137784
								sung metastasis stroma up	104	0.0211864	0.137783
								reactome pka mediated phosphorylation of creb	19	0.0174757	0.137836
								mili pseudopodia	40	0.0273684	0.137771
								kegg amyotrophic lateral sclerosis als	51	0.0363289	0.137654
								holleman asparaginase resistance all up	19	0.0265306	0.137416
								reactome microrna mirna biogenesis	23	0.0163599	0.137363
								schraets mll targets dn	31	0.0236686	0.137635
								cowling mycn targets	39	0.0223124	0.137459
								acevedo normal tissue adjacent to liver tumor up	160	0.00790514	0.137646
								lee intrathymic t progenitor	16	0.014433	0.137462
								servitja islet hnf1a targets up	153	0.0433925	0.138388
								tavazoie metastasis	94	0.0019685	0.139844
								hatada methylated in lung cancer up	337	0.0200401	0.139611
								jechlinger epithelial to mesenchymal transition dn	58	0.045098	0.139512
								takao response to uvb radiation dn	90	0.0369565	0.139326
								fontaine papillary thyroid carcinoma dn	74	0.0138067	0.139513
								lein choroid plexus markers	99	0.015534	0.139578
								wang thoc1 targets dn	19	0.00192678	0.139778
								steger adipogenesis up	21	0.0127505	0.139918
								reactome chondroitin sulfate biosynthesis	19	0.0100604	0.139694
								darwiche skin tumor promoter dn	161	0.0230769	0.139761
								hoelzel nf1 targets dn	105	0.0136986	0.140195
								turashvili breast ductal carcinoma vs ductal normal dn	171	0.0321932	0.141249
								graham cml quiescent vs normal quiescent dn	39	0.0389344	0.14114
								liang silenced by methylation up	32	0.0160643	0.141007
								mcbryan pubertal breast 3 4wk dn	30	0.0417495	0.141461
								reactome uptake and actions of bacterial toxins	28	0.0371094	0.141612
								reactome transcriptional regulation by runx2	111	0.0226337	0.14138
								graham cml dividing vs normal quiescent dn	84	0.035865	0.141614
								wang mll targets	264	0.0227273	0.142241
								senese hdac3 targets dn	487	0.0162933	0.142476
								mody hippocampus postnatal	52	0.0336634	0.142743
								biocarta gh pathway	25	0.015748	0.142546
								azare stat3 targets	24	0.0362473	0.142971
								lindstedt dendritic cell maturation c	61	0.039749	0.142947
								benporath nos targets	165	0.0242424	0.143692
								stark prefrontal cortex 22q11 deletion up	184	0.0160966	0.143489
								ohguchi liver hnf4a targets up	47	0.00574713	0.143365
								ferreira ewings sarcoma unstable vs stable dn	86	0.0410156	0.143164
								reactome signaling by ntrk2 trkb	25	0.015625	0.143033
								woo liver cancer recurrence up	98	0.0492505	0.143137
								chiang liver cancer subclass ctnnb1 up	157	0.015748	0.143167
								burton adipogenesis 9	77	0.0447761	0.143303
								mori small pre bii lymphocyte up	69	0.0311891	0.143687
								chen neuroblastoma copy number gains	46	0.0194932	0.143794
								reactome synaptic adhesion like molecules	21	0.0196464	0.143953
								smid breast cancer normal like up	418	0.0440882	0.143958
								cairo liver development dn	199	0.0110906	0.143741
								gavin foxp3 targets cluster p2	69	0.0218688	0.143722
								kyng normal aging up	15	0.0397614	0.143591
								flechner pbl kidney transplant ok vs donor dn	39	0.0351967	0.143508
								bakker foxo3 targets up	51	0.0182556	0.143812
								lei hoxc8 targets dn	15	0.0167015	0.143577
								pid ptp1b pathway	52	0.0357143	0.143415
								schuetz breast cancer ductal invasive up	317	0.0475207	0.144031
								reactome ion transport by p type atpases	52	0.0168539	0.144215
								bhat esr1 targets via akt1 up	266	0.0493097	0.144067
								browne hcmv infection 1hr up	49	0.0211132	0.143993
								zhong secretome of lung cancer and endothelium	60	0.0451866	0.143826
								torchia targets of ewsr1 fli1 fusion up	241	0.0141988	0.143623
								vandesluis commd1 targets group 3 dn	32	0.00609756	0.143507
								ebauer targets of pax3 foxo1 fusion up	183	0.030303	0.143418
								reactome stimuli sensing channels	103	0.00192678	0.143556
								bhat esr1 targets not via akt1 up	202	0.0285132	0.143648
								reactome vegfr2 mediated vascular permeability	27	0.0222672	0.143665
								gentile uv response cluster d6	33	0.0243408	0.14351
								mcbryan pubertal breast 4 5wk up	235	0.0423387	0.143368
								reactome cell junction organization	84	0.014553	0.143789
								nakajima mast cell	42	0.021097	0.14357
								reactome neurotransmitter receptors and postsynaptic signal transmission	194	0.00371058	0.143491
								xu hgf targets repressed by akt1 dn	78	0.00568182	0.143388
								chyla cbfa2t3 targets up	351	0.0243408	0.143114
								valk aml cluster 7	26	0.0152672	0.143712
								sabates colorectal adenoma dn	262	0.0157171	0.143699
								gavin foxp3 targets cluster p3	147	0.0185185	0.143492
								buckanovich t lymphocyte homing on tumor dn	20	0.0176125	0.143283
								fontaine follicular thyroid adenoma up	69	0.026	0.143391
								figueroa aml methylation cluster 4 up	97	0.00986193	0.143292
								west adrenocortical tumor markers dn	17	0.0134357	0.14297
								reactome extracellular matrix organization	290	0.034	0.142684
								reactome ca2plus pathway	55	0.0230769	0.142663
								liang hematopoiesis stem cell number small vs huge up	36	0.0259481	0.142365
								reactome signaling by moderate kinase activity braf mutants	45	0.0302491	0.142184
								reactome ca dependent events	35	0.0249042	0.142087
								urs adipocyte differentiation up	61	0.0273438	0.141938
								west adrenocortical carcinoma vs adenoma dn	25	0.042471	0.141725
								osada ascl1 targets up	44	0.014	0.141528
								pid ncadherin pathway	33	0.0499002	0.141409
								nakamura adipogenesis late dn	34	0.0375	0.141254
								engelmann cancer progenitors up	45	0.0315789	0.141175
								reactome signaling by ntrks	98	0.0261044	0.140961
								mili pseudopodia chemotaxis dn	390	0.0188285	0.140958
								chung blister cytotoxicity dn	42	0.0340681	0.140912
								pid hif1a pathway	15	0.04375	0.140724
								smid breast cancer relapse in bone dn	290	0.027668	0.141398
								kuuselo pancreatic cancer 19q13 amplification	29	0.0432432	0.141216
								bohn primary immunodeficiency syndrom dn	37	0.0365854	0.141309
								oswald hematopoietic stem cell in collagen gel dn	243	0.03125	0.141275
								kang immortalized by tert up	84	0.0323887	0.141085
								miyagawa targets of ewsr1 ets fusions dn	205	0.0305499	0.140943
								reactome oncogenic mapk signaling	80	0.0273224	0.140738
								wang targets of mll cbp fusion up	40	0.0351562	0.141556
								rashi response to ionizing radiation 5	122	0.00990099	0.141655
								heller silenced by methylation dn	99	0.0161943	0.141679
								lucas hnf4a targets up	54	0.0178571	0.142398
								mccabe bound by hoxc6	387	0.00733945	0.142775
								valk aml cluster 3	28	0.0198413	0.142418
								sansom apc targets up	116	0.0215686	0.142431
								reactome hs gag degradation	22	0.0289855	0.142198
								reactome non integrin membrane ecm interactions	58	0.0371901	0.142212
								reactome adrenaline noradrenaline inhibits insulin secretion	25	0.0348162	0.142169
								reactome g alpha z signalling events	44	0.0194175	0.142114
								nikolsky breast cancer 17q21 q25 amplicon	293	0.030303	0.14213
								zirn tretinoin response wt1 up	22	0.0347648	0.141912
								hollern solid nodular breast tumor dn	29	0.037422	0.142214
								reactome p75 ntr receptor mediated signalling	91	0.0208333	0.142291
								rozanov mmp14 targets dn	32	0.0286299	0.142426
								meissner npc hcp with h3k4me2	442	0.00618557	0.142348
								eppert hsc r	110	0.0241449	0.142304
								guillaumond klf10 targets up	45	0.0460922	0.14237
								reactome cell cell communication	119	0.0120968	0.142209
								yauch hedgehog signaling paracrine up	133	0.0255906	0.142466
								masri resistance to tamoxifen and aromatase inhibitors dn	18	0.0228216	0.142367
								ivanova hematopoiesis stem cell	175	0.0211946	0.142303
								yordy reciprocal regulation by ets1 and sp100 dn	64	0.0342857	0.143145
								schaeffer sox9 targets in prostate development dn	43	0.0442308	0.143194
								kim wt1 targets 12hr up	151	0.0379747	0.143184
								reactome diseases of metabolism	95	0.0191939	0.143403
								pid trkr pathway	61	0.0397614	0.143294
								nakamura adipogenesis early dn	35	0.0352697	0.143186
								croonquist nras vs stromal stimulation up	38	0.0442656	0.143081
								ramaswamy metastasis dn	57	0.0411765	0.142904
								reactome crmps in sema3a signaling	16	0.0179283	0.142886
								reactome glycogen breakdown glycogenolysis	15	0.0327869	0.142755
								bredemeyer rag signaling not via atm up	61	0.0197239	0.142889
								west adrenocortical carcinoma vs adenoma up	19	0.0378151	0.142737
								browne hcmv infection 14hr dn	258	0.0317125	0.142854
								reactome ret signaling	41	0.0327198	0.142668
								sheth liver cancer vs txnip loss pam3	69	0.0258964	0.142647
								stambolsky response to vitamin d3 dn	23	0.0329897	0.142582
								torchia targets of ewsr1 fli1 fusion top20 dn	18	0.0335306	0.142171
								han jnk singaling dn	37	0.0246407	0.142169
								reactome integrin cell surface interactions	82	0.0446602	0.142315
								clasper lymphatic vessels during metastasis dn	34	0.0417537	0.142136
								reactome aquaporin mediated transport	48	0.0286738	0.142199
								grade colon vs rectal cancer dn	47	0.0209205	0.142532
								boyault liver cancer subclass g6 up	62	0.0334646	0.144151
								okawa neuroblastoma 1p36 31 deletion	22	0.0487805	0.144254
								hoffmann small pre bii to immature b lymphocyte up	53	0.0440613	0.144359
								zhang gata6 targets dn	60	0.0245399	0.144219
								bilban b cll lpl dn	36	0.0456432	0.144072
								reactome ncam signaling for neurite out growth	63	0.0326296	0.144043
								smith tert targets up	137	0.0424628	0.144057
								perez tp63 targets	314	0.016	0.144086
								kegg glycosaminoglycan degradation	21	0.03125	0.144604
								sig insulin receptor pathway in cardiac myocytes	49	0.0271318	0.14477
								valk aml with evi1	21	0.0256917	0.145211
								delacroix rar bound es	422	0.0331384	0.145548
								marks hdac targets up	23	0.0251046	0.146003
								bochkis foxa2 targets	379	0.0128205	0.1462
								mikkelsen mcv6 lcp with h3k4me3	146	0.0385396	0.146951
								pasqualucci lymphoma by gc stage dn	160	0.0383838	0.14678
								li prostate cancer epigenetic	32	0.0265849	0.146602
								de yy1 targets up	19	0.0178218	0.146996
								reactome degradation of the extracellular matrix	134	0.0383838	0.146841
								lee liver cancer e2f1 up	60	0.0427699	0.147355
								naba ecm affiliated	162	0.0175439	0.147214
								reactome metabolism of steroids	142	0.00746269	0.1473
								dutertre estradiol response 24hr dn	477	0.0393375	0.147316
								tarte plasma cell vs b lymphocyte dn	36	0.0264766	0.147035
								pid cxcr4 pathway	98	0.0495868	0.147514
								kegg axon guidance	125	0.0287474	0.148307
								reactome phospholipid metabolism	192	0.0213178	0.148225
								weng por targets global dn	22	0.0297398	0.147922
								greenbaum e2a targets dn	18	0.0442105	0.147778
								chesler brain qtl cis	65	0.0464646	0.147676
								lee targets of ptch1 and sufu up	50	0.0346232	0.14753
								reactome rna polymerase iii chain elongation	16	0.0414079	0.147535
								mikkelsen mef lcp with h3k4me3	110	0.043299	0.147456
								lim mammary luminal mature up	97	0.0496032	0.147414
								plasari tgfb1 signaling via nfic 10hr up	53	0.0379242	0.147341
								klein primary effusion lymphoma dn	53	0.0448065	0.14747
								reactome cardiac conduction	135	0.0134615	0.147404
								le neuronal differentiation up	18	0.0299401	0.147378
								gentles leukemic stem cell up	25	0.0386179	0.147249
								ueda periferal clock	154	0.0341365	0.147289
								reactome antigen activates b cell receptor bcr leading to generation of second messengers	30	0.0252101	0.147559
								bruins uvc response via tp53 group d	240	0.0301318	0.147556
								haddad b lymphocyte progenitor	261	0.0182927	0.147631
								rickman head and neck cancer b	38	0.0115163	0.147699
								browne hcmv infection 12hr dn	88	0.0460922	0.147822
								kondo ezh2 targets	212	0.0341365	0.14775
								reactome role of lat2 ntal lab on calcium mobilization	16	0.0294118	0.147665
								mikkelsen es icp with h3k27me3	35	0.0126812	0.147336
								biocarta ppara pathway	52	0.0383212	0.147403
								schlesinger h3k27me3 in normal and methylated in cancer	24	0.00896057	0.147393
								boyault liver cancer subclass g6 dn	19	0.0490196	0.147231
								gaussmann mll af4 fusion targets f dn	31	0.0393701	0.147414
								brideau imprinted genes	58	0.0340265	0.147537
								chiang liver cancer subclass ctnnb1 dn	159	0.03125	0.147359
								roversi glioma loh regions	41	0.0214008	0.147458
								mcgowan rsp6 targets up	18	0.0348837	0.147377
								boyault liver cancer subclass g3 dn	50	0.0307692	0.147305
								mahajan response to il1a up	70	0.0299401	0.147432
								meissner npc icp with h3 unmethylated	19	0.00992064	0.147318
								reactome sema4d in semaphorin signaling	23	0.02537	0.147038
								rickman tumor differentiated well vs poorly up	215	0.0364372	0.147241
								pid hedgehog gli pathway	48	0.0264766	0.147371
								kegg long term depression	66	0.0296296	0.147475
								biocarta nos1 pathway	21	0.0344168	0.147422
								reactome transmission across chemical synapses	256	0.00735294	0.147248
								yagi aml survival	110	0.0327869	0.147141
								mcdowell acute lung injury dn	44	0.0422265	0.147259
								okumura inflammatory response lps	163	0.020202	0.147408
								biocarta integrin pathway	34	0.0433925	0.14741
								lin npas4 targets up	152	0.0123203	0.14746
								reactome biological oxidations	194	0.0182482	0.147347
								reactome map2k and mapk activation	40	0.042328	0.147292
								servitja islet hnf1a targets dn	95	0.00919118	0.147867
								mitsiades response to aplidin up	406	0.039501	0.147966
								reactome fgfr2 alternative splicing	25	0.0329218	0.148095
								wang barretts esophagus up	50	0.0348837	0.148015
								bilanges serum sensitive via tsc1	18	0.0402299	0.147941
								reactome dag and ip3 signaling	39	0.0271845	0.147903
								burton adipogenesis 11	45	0.04	0.148317
								grabarczyk bcl11b targets dn	55	0.0350877	0.148768
								kegg asthma	27	0.0329457	0.148828
								gaussmann mll af4 fusion targets c dn	17	0.039604	0.149063
								yamashita liver cancer stem cell up	46	0.0423387	0.148947
								yagi aml with inv 16 translocation	380	0.0306513	0.148832
								blalock alzheimers disease incipient dn	153	0.0470348	0.148728
								kegg vasopressin regulated water reabsorption	40	0.0292505	0.148861
								mikkelsen mcv6 hcp with h3k27me3	395	0.00378072	0.148851
								reactome inwardly rectifying kplus channels	28	0.019084	0.148706
								delpuech foxo3 targets up	63	0.04329	0.149104
								lui thyroid cancer cluster 5	16	0.0446602	0.149244
								pid hnf3a pathway	41	0.0452756	0.149427
								ouillette cll 13q14 deletion dn	49	0.0373281	0.149397
								moreaux multiple myeloma by taci up	336	0.0318725	0.149345
								kegg dilated cardiomyopathy	88	0.0313076	0.149558
								madan dppa4 targets	49	0.0202952	0.149686
								kim all disorders calb1 corr dn	33	0.0202952	0.15023
								cervera sdhb targets 1 up	108	0.026694	0.150668
								matzuk male reproduction sertoli	25	0.0389105	0.15127
								zhou inflammatory response fima dn	241	0.0244361	0.151209
								bertucci invasive carcinoma ductal vs lobular up	21	0.0272374	0.151903
								magrangeas multiple myeloma igll vs iglk dn	22	0.0392157	0.151755
								reactome intracellular signaling by second messengers	288	0.0325671	0.151764
								changolkar h2afy targets dn	36	0.0305499	0.151593
								setlur prostate cancer tmprss2 erg fusion dn	19	0.0204082	0.151723
								zhong response to azacitidine and tsa up	167	0.0411215	0.151624
								kegg pathways in cancer	316	0.0491159	0.151436
								sig pip3 signaling in b lymphocytes	36	0.0417537	0.151989
								reactome signaling by bmp	28	0.0285205	0.151941
								roversi glioma copy number dn	52	0.0255403	0.151785
								reactome rho gtpase cycle	134	0.0325866	0.151909
								coates macrophage m1 vs m2 dn	71	0.0398406	0.151945
								reactome neuronal system	391	0.00757576	0.151941
								kegg hedgehog signaling pathway	56	0.0224033	0.151791
								reactome cell extracellular matrix interactions	18	0.0470085	0.151527
								midorikawa amplified in liver cancer	50	0.0476191	0.151802
								bruins uvc response via tp53 group b	491	0.0487805	0.151887
								valk aml cluster 13	29	0.0283976	0.152178
								krasnoselskaya ilf3 targets dn	44	0.0418327	0.152716
								zhou inflammatory response live up	390	0.0311284	0.152633
								naba core matrisome	250	0.0427184	0.15263
								zhou inflammatory response live dn	328	0.0485437	0.152906
								ji carcinogenesis by kras and stk11 dn	16	0.0425963	0.152824
								reactome ncam1 interactions	42	0.0252427	0.153032
								pid hnf3b pathway	44	0.0222222	0.153163
								lee liver cancer ciprofibrate up	58	0.044316	0.153041
								hummel burkitts lymphoma up	39	0.0191205	0.153041
								tonks targets of runx1 runx1t1 fusion sustainded in erythrocyte up	42	0.0483193	0.152871
								reactome notch2 activation and transmission of signal to the nucleus	20	0.0411523	0.152837
								browne hcmv infection 2hr up	35	0.0365854	0.152752
								martoriati mdm4 targets fetal liver dn	469	0.0353635	0.152546
								alonso metastasis emt up	32	0.0440613	0.152676
								ting silenced by dicer	26	0.042	0.152684
								weigel oxidative stress by hne and tbh	55	0.0421456	0.15279
								kegg phosphatidylinositol signaling system	76	0.0365385	0.152525
								reactome diseases of immune system	23	0.0347648	0.152649
								kyng environmental stress response not by gamma in ws	30	0.0444915	0.152721
								mikkelsen npc hcp with h3k4me3 and h3k27me3	196	0.0158416	0.152791
								chemnitz response to prostaglandin e2 dn	341	0.0204918	0.153088
								kyng environmental stress response not by uv in old	23	0.0411523	0.153202
								sheth liver cancer vs txnip loss pam4	259	0.0354478	0.153108
								kegg ppar signaling pathway	65	0.0273038	0.152808
								rao bound by sall4 isoform b	469	0.0170778	0.15348
								reactome foxo mediated transcription	65	0.0390335	0.15345
								mclachlan dental caries dn	74	0.0435644	0.153307
								rao bound by sall4	210	0.0186916	0.153165
								reactome ticam1 rip1 mediated ikk complex recruitment	17	0.0318471	0.152458
								cui tcf21 targets up	32	0.044898	0.15235
								rorie targets of ewsr1 fli1 fusion dn	26	0.0305927	0.15211
								kegg gap junction	84	0.0326296	0.15259
								pedrioli mir31 targets dn	370	0.0338645	0.152481
								naba ecm glycoproteins	175	0.0368217	0.152649
								martoriati mdm4 targets fetal liver up	206	0.0458333	0.152584
								pid fgf pathway	55	0.0491493	0.153181
								reactome metabolism of vitamins and cofactors	177	0.0135659	0.153108
								kegg abc transporters	43	0.00992064	0.153257
								reactome cargo concentration in the er	33	0.0373444	0.154304
								reactome potassium channels	94	0.00381679	0.154824
								bernard ppapdc1b targets dn	53	0.0345528	0.155109
								pasqualucci lymphoma by gc stage up	258	0.0471311	0.155013
								boylan multiple myeloma c up	44	0.0471698	0.155032
								pid ret pathway	39	0.0464135	0.155206
								reactome metabolism of carbohydrates	277	0.0201207	0.15705
								kegg calcium signaling pathway	169	0.0373134	0.157404
								kegg long term potentiation	68	0.0337711	0.157246
								odonnell metastasis dn	23	0.044898	0.157132
								sig il4receptor in b lyphocytes	26	0.0322581	0.157499
								shedden lung cancer good survival a12	256	0.038	0.157419
								cui tcf21 targets 2 up	382	0.0477178	0.157465
								zheng il22 signaling up	49	0.0255403	0.157474
								lee liver cancer myc dn	60	0.0273224	0.157479
								reactome muscle contraction	200	0.0275735	0.157242
								sato silenced by methylation in pancreatic cancer 1	380	0.040619	0.157241
								purbey targets of ctbp1 and satb1 dn	152	0.0426357	0.157204
								hollern papillary breast tumor	16	0.0245283	0.157665
								gaussmann mll af4 fusion targets d up	36	0.0238569	0.157575
								mikkelsen mcv6 icp with h3k27me3	70	0.0123023	0.15747
								reactome metabolic disorders of biological oxidation enzymes	33	0.0436433	0.15724
								iizuka liver cancer progression l1 g1 up	18	0.0493827	0.157314
								reactome rab geranylgeranylation	58	0.0425963	0.157127
								theilgaard neutrophil at skin wound dn	215	0.0430328	0.157052
								morosetti facioscapulohumeral muscular distrophy up	16	0.0350515	0.156898
								wang clim2 targets up	219	0.0232558	0.156942
								browne hcmv infection 12hr up	102	0.014553	0.156865
								reactome transport of vitamins nucleosides and related molecules	41	0.0361011	0.156713
								reactome class b 2 secretin family receptors	84	0.018622	0.157091
								reactome activation of smo	17	0.0341365	0.157104
								mcmurray tp53 hras cooperation response dn	61	0.0464646	0.157174
								weng por dosage	21	0.0426716	0.157369
								lee targets of ptch1 and sufu dn	80	0.0257426	0.157814
								kegg neurotrophin signaling pathway	125	0.0378486	0.1594
								naba proteoglycans	31	0.021611	0.159328
								cairo hepatoblastoma up	193	0.0351967	0.159805
								reactome notch4 intracellular domain regulates transcription	19	0.0393701	0.160126
								reactome abc transporters in lipid homeostasis	18	0.0307692	0.160106
								reactome hedgehog off state	104	0.0433071	0.16099
								bandres response to carmustin mgmt 48hr dn	152	0.0338078	0.160524
								andersen cholangiocarcinoma class1	57	0.0350515	0.160381
								hoshida liver cancer subclass s3	256	0.0311927	0.160328
								yao temporal response to progesterone cluster 2	53	0.0332168	0.160718
								ivanova hematopoiesis stem cell short term	21	0.0296443	0.160595
								mikkelsen npc hcp with h3k27me3	316	0.00761905	0.161056
								tonks targets of runx1 runx1t1 fusion erythrocyte dn	18	0.0402194	0.16149
								davicioni pax foxo1 signature in arms dn	19	0.0468165	0.161719
								lee liver cancer survival up	169	0.0107527	0.161775
								fortschegger phf8 targets up	242	0	0.161912
								meissner npc hcp with h3k4me2 and h3k27me3	322	0.0153846	0.161825
								plasari nfic targets basal dn	17	0.0468432	0.162226
								moreira response to tsa dn	17	0.0470348	0.162231
								liu vmyb targets up	114	0.035343	0.162088
								bonome ovarian cancer survival optimal debulking	216	0.0368852	0.161992
								reactome complement cascade	55	0.0349265	0.161976
								iwanaga carcinogenesis by kras up	150	0.0325866	0.162146
								bredemeyer rag signaling via atm not via nfkb up	48	0.0469667	0.162417
								pid rhodopsin pathway	21	0.0300885	0.16263
								reactome arachidonic acid metabolism	54	0.0350877	0.162889
								kang ar targets up	16	0.0464217	0.163039
								naba secreted factors	301	0.0270793	0.16283
								hofmann myelodysplastic syndrom high risk dn	20	0.048583	0.162969
								tang senescence tp53 targets up	33	0.045929	0.162864
								pid hedgehog 2pathway	21	0.0474227	0.16259
								reactome cd209 dc sign signaling	21	0.0453649	0.163201
								hoelzel nf1 targets up	129	0.044	0.163353
								reactome the canonical retinoid cycle in rods twilight vision	22	0.0290135	0.163354
								newman ercc6 targets dn	34	0.0413386	0.163188
								reactome acyl chain remodelling of pc	25	0.049904	0.163105
								wang response to bexarotene up	33	0.040747	0.163017
								lim mammary luminal progenitor up	55	0.0429688	0.162961
								conrad stem cell	37	0.0388693	0.162852
								cervera sdhb targets 1 dn	34	0.0270793	0.162814
								reactome phase 0 rapid depolarisation	42	0.0265655	0.163047
								pedersen targets of 611ctf isoform of erbb2	69	0.0492813	0.163385
								heller hdac targets silenced by methylation up	418	0.0253411	0.163255
								rao bound by sall4 isoform a	161	0.0116732	0.163084
								reactome plasma lipoprotein assembly remodeling and clearance	70	0.0456942	0.163593
								reactome activation of nmda receptors and postsynaptic events	87	0.0413386	0.163558
								reactome protein protein interactions at synapses	83	0.0380228	0.163694
								reactome glycosaminoglycan metabolism	120	0.0412371	0.163889
								kegg proximal tubule bicarbonate reclamation	22	0.0405405	0.163695
								biocarta gsk3 pathway	19	0.0446097	0.163729
								chiang liver cancer subclass proliferation dn	167	0.0239411	0.164313
								yamashita liver cancer stem cell dn	73	0.0190972	0.164188
								weng por targets global up	18	0.0465116	0.164136
								lin npas4 targets dn	62	0.0343434	0.164416
								odonnell metastasis up	67	0.0339623	0.164298
								meissner npc hcp with h3 unmethylated	479	0.0367505	0.164398
								xu gh1 exogenous targets up	50	0.0289331	0.164477
								reactome glycerophospholipid biosynthesis	113	0.0495049	0.164684
								reactome formation of fibrin clot clotting cascade	38	0.0211268	0.164495
								dutertre estradiol response 6hr dn	86	0.048583	0.16452
								reactome common pathway of fibrin clot formation	21	0.0352734	0.164835
								reactome regulation of insulin like growth factor igf transport and uptake by insulin like growth factor binding proteins igfbps	119	0.0433996	0.165242
								tonks targets of runx1 runx1t1 fusion granulocyte dn	16	0.0462185	0.165375
								reactome unblocking of nmda receptors glutamate binding and activation	21	0.0455446	0.16542
								reactome nitric oxide stimulates guanylate cyclase	19	0.0450098	0.1654
								reactome g alpha i signalling events	351	0.0297398	0.16665
								schaeffer prostate development 6hr dn	424	0.0465587	0.167284
								riz erythroid differentiation apobec2	22	0.0407767	0.167723
								schlesinger methylated de novo in cancer	87	0.0492126	0.167478
								reactome cell cell junction organization	57	0.0412574	0.167363
								browne hcmv infection 48hr up	169	0.0346939	0.167502
								kegg complement and coagulation cascades	68	0.0251347	0.167549
								faelt b cll with vh3 21 dn	45	0.0457516	0.167583
								reactome peptide hormone metabolism	78	0.0359712	0.167779
								hsiao liver specific genes	233	0.0121951	0.168036
								browne hcmv infection 20hr up	220	0.0379242	0.16826
								zhou inflammatory response fima up	446	0.0384615	0.169485
								kegg retinol metabolism	53	0.0431035	0.169655
								kim liver cancer poor survival dn	42	0.0443262	0.169762
								reactome visual phototransduction	94	0.0276339	0.170729
								mikkelsen ips hcp with h3 unmethylated	66	0.017452	0.171025
								kohoutek ccnt2 targets	52	0.0362903	0.171494
								basaki ybx1 targets dn	359	0.0465587	0.172651
								staege ewing family tumor	30	0.0284553	0.172663
								pyeon cancer head and neck vs cervical dn	24	0.0471204	0.176087
								korkola embryonic carcinoma vs seminoma dn	23	0.0377698	0.177093
								lee liver cancer ciprofibrate dn	66	0.0432432	0.177213
								kondo prostate cancer with h3k27me3	175	0.00853242	0.177321
								rickman head and neck cancer a	93	0.0461847	0.177375
								meissner npc hcp with h3k4me3 and h3k27me3	135	0.0295858	0.177991
								takeda targets of nup98 hoxa9 fusion 6hr up	69	0.0471311	0.178058
								acevedo liver cancer with h3k27me3 up	257	0.0223464	0.177847
								torchia targets of ewsr1 fli1 fusion top20 up	20	0.0390947	0.178247
								mikkelsen ips icp with h3k27me3	47	0.0454545	0.182124
								foster kdm1a targets up	218	0.0494506	0.188787
								lein medulla markers	80	0.0280899	0.189373
								reactome gpcr ligand binding	398	0.0457875	0.198455
								servitja liver hnf1a targets dn	153	0.0460993	0.202343

## Sheet: webgestalt
Supplementary Table 6B. Webgestalt enrichment analysis of DNA methylation for White,Black and Asian PCa patients.
Asian VS Black								Asian VS White								Black VS White
Black				Asian				White				Asian				White				Black
Description	Overlap	PValue	UserId	Description	Overlap	PValue	UserId	Description	Overlap	PValue	UserId	Description	Overlap	PValue	UserId	Description	Overlap	PValue	UserId	Description	Overlap	PValue	UserId
Platinum drug resistance	3	0.000682543	BAK1;GSTA1;GSTM5	intracellular transport	248	1.06378e-06	SRP14;RNF31;SCRIB;RNF139;RBM15B;PDCD6;SRSF11;COPB1;TBC1D22B;DHRS4;RPL21;RPL10;ARF1;RPLP2;BET1L;RPL37A;BBS7;YWHAB;ACOX1;MAPK1;TLK1;HNRNPU;PEX10;U2AF2;RANBP2;GSK3B;SRP9;RPS7;RAB9B;KPNB1;VPS37A;BLOC1S3;PEX26;DYNLRB2;SEC24D;SYVN1;CHCHD4;SRSF3;RPL30;CTDSPL2;FNBP1L;RPS15A;ARF5;PMM2;RPS3A;KPNA4;ARIH2;CYC1;MAGOH;TRAPPC4;UPF2;HTRA2;HSPD1;CHRNB2;ARFIP2;TMED4;HRAS;IER3IP1;RPL35;RPS8;RPL8;RPLP1;RPS14;PEX1;VP…	Platinum drug resistance	2	0.020376	BAK1;GSTM5	exogenous drug catabolic process	9	0.000291115	CYP2C8;CYP2B6;CYP2C19;CYP2C18;CYP2F1;CYP3A4;CYP2C9;NUDT15;CYP2A13	drug binding	300	1.21822e-06	KIF27;ADK;ACTR3;ERCC2;FKBP1A;EIF2AK2;N4BP2;CDC42BPA;MTR;MAP3K8;BBS12;VRK2;UCKL1;NEK9;UBE2A;CDK17;PPIA;CTPS2;NME4;CBWD2;TTL;BUB1;CDC34;WNK4;FIGNL1;PMVK;TTK;LANCL2;ATP1B1;P2RX2;LARS2;WEE1;ABCD4;MAST2;ETNPPL;STK16;UBE2L3;CHEK2;TTLL7;STKLD1;DARS;APRT;ETNK1;EPHB4;STK35;CD320;PRKD1;P2RX7;HSP90AA1;DDX50;PAPSS2;GALK2;DDR2;ATP6V1B2;ULK2;ABCD3;ASNS;FES;AURKA;AADAT;ACVR1;DDX24;TGFBR2;ABCB9;EPHA4;CARS;DNAJA2…	exogenous drug catabolic process	4	0.0179385	CYP2C8;CYP2B6;CYP2C9;CYP2C19
Drug metabolism	2	0.012565	GSTA1;GSTM5	Golgi vesicle transport	67	2.68629e-06	RNF139;PDCD6;COPB1;ARF1;BET1L;RER1;SEC24D;LYPLA1;ARF5;TRAPPC4;TMED4;IER3IP1;SPTB;DCTN5;TMED3;CNIH4;SEC22C;NAPG;NRBP1;GOSR2;COPA;RAB26;YIF1A;RAB2A;PRKD1;GGA3;ERGIC3;PROC;CAPZA1;CTAGE1;KIF18A;PGAP1;KLHL12;CNIH1;MCFD2;DYNLL1;COG8;CNST;TAPBP;SEC23A;LMAN1;PICK1;MPPE1;VAPB;DCTN3;PROS1;SERPINA1;BBS2;COG5;SNAP23;VAMP3;AP1AR;SEC13;KIF5A;ATP9B;ANK3;ARL1;STX5;VTI1A;ARFGAP1;CSNK1D;GOLGA5;MON2;COPZ1;CYTH3;ARF…	cellular response to mechanical stimulus	3	0.00167172	BAK1;SOX9;ITGA2	G protein-coupled receptor signaling pathway	265	0	TRHR;OR3A2;OR2AG2;MAS1;OR1N1;OR3A3;MRGPRX4;OR2B11;YWHAB;RGS6;PLEK;OR2Y1;OR52E2;PROKR2;TAS1R2;OR6F1;MRGPRX3;OR1G1;OR6A2;OR10A5;OR7A5;OR7A17;OR2G2;OR10V1;OR11L1;APLP1;GNG2;CCL4L1;OR2AT4;OR10H2;MARCO;HTR2A;GRM6;FPR1;VN1R3;CCL3;TAAR9;HRH2;OR1A1;OR6C6;OR7G1;CCL18;OR1J2;OR7C2;CXCR1;OR10C1;OR7A10;SORCS1;GABRR2;TAAR6;OR7D4;OR10G4;OR10AD1;OR14A16;MRGPRX1;OR1B1;ADRA1B;OR6T1;GPR1;OR10H5;OR2Z1;CMKLR1;ADCYAP1…	Platinum drug resistance	18	0.00838616	XIAP;BIRC5;CASP3;APAF1;MDM2;MAP3K5;MAPK3;BAD;BAX;CDKN1A;MSH6;GSTO2;BIRC2;MLH1;AKT2;REV3L;AKT3;TP53	Drug metabolism	7	0.0419421	CYP2C8;CYP2B6;GSTA1;UGT2B15;CYP2C9;UGT1A1;CYP2C19
Metabolism of xenobiotics by cytochrome P450	2	0.013927	GSTA1;GSTM5	ER to Golgi vesicle-mediated transport	44	7.00488e-06	RNF139;PDCD6;COPB1;ARF1;BET1L;SEC24D;TRAPPC4;TMED4;IER3IP1;SPTB;DCTN5;TMED3;CNIH4;SEC22C;NRBP1;GOSR2;COPA;YIF1A;RAB2A;ERGIC3;PROC;CAPZA1;CTAGE1;PGAP1;KLHL12;CNIH1;MCFD2;DYNLL1;COG8;SEC23A;LMAN1;MPPE1;VAPB;DCTN3;PROS1;SERPINA1;COG5;SEC13;ANK3;STX5;VTI1A;ARFGAP1;CSNK1D;COPZ1	positive regulation of store-operated calcium channel activity	1	0.0179152	STIM1	G protein-coupled receptor activity	207	0	TRHR;OR3A2;OR2AG2;MAS1;OR1N1;OR3A3;MRGPRX4;OR2B11;OR2Y1;OR52E2;PROKR2;TAS1R2;OR6F1;MRGPRX3;OR1G1;OR6A2;OR10A5;OR7A5;OR7A17;OR2G2;OR10V1;OR11L1;OR2AT4;OR10H2;HTR2A;GRM6;FPR1;VN1R3;TAAR9;HRH2;OR1A1;OR6C6;OR7G1;OR1J2;OR7C2;CXCR1;OR10C1;OR7A10;SORCS1;TAAR6;OR7D4;OR10G4;OR10AD1;OR14A16;MRGPRX1;OR1B1;ADRA1B;OR6T1;GPR1;OR10H5;OR2Z1;CMKLR1;ADCYAP1R1;GPR50;HCRTR2;OR2G3;NPFFR2;OR56A5;OR2V2;FPR3;VN1R2;OR10P…	drug metabolic process	127	0.00900397	ADK;ADAL;COX7C;MTR;AGT;BCHE;ECE1;ALDOA;PTS;APIP;PRDX5;FAHD1;DUOX2;DDAH1;OXCT1;FIGNL1;NDUFAF1;ATP1B1;ABCD4;APRT;CYP2R1;SDHC;NDUFS4;CD320;P2RX7;HSP90AA1;ATP6V1B2;ASNS;AADAT;AKR7A2;ENO3;DLAT;CYP2D6;IDH3G;PGK1;PPARA;NNT;MTHFD2L;PCCB;ENO2;PTX3;CBR4;PHGDH;ADI1;GAPDH;PAOX;FPGS;NR1I2;BTD;UST;MTHFD2;ZBTB20;SLC25A12;NDUFB2;NDUFS8;CYP4F12;KHSRP;LMBRD1;EIF6;SDS;PAFAH1B1;PKD2;LRTOMT;LDHC;DHFR;GCSH;ACAT1;ALDH5…	Cisplatin	4	0.0434541	CYP2B6;A2M;CYP2C9;MPO
Drug metabolism	2	0.0149888	GSTA1;GSTM5	negative regulation of transcription from RNA polymerase II promoter in response to stress	6	0.000656533	JUN;VHL;HIF1AN;CITED2;IMPACT;TMBIM6	negative regulation of endoplasmic reticulum calcium ion concentration	1	0.0238166	BAK1	ion channel activity	90	7.53397e-12	KCNE1;CHRNB2;SCN8A;GRIK5;GRIN2B;KCNQ2;KCNA1;KCNQ3;SCN11A;ANO5;CACNG3;GABRR2;BEST2;KCNB2;GRIN2A;KCNH1;SCN5A;KCNK18;TRPC4;GLRA1;CACNG2;GABRB1;KCNT1;SCN10A;FAM155A;NALCN;GABRE;ANO2;OPRM1;KCNK9;SLC24A1;RYR1;NMUR2;OTOP1;GABRB3;GABRP;CACNA2D4;TMEM63C;GLRA3;KCNT2;CHRNA4;TRPC7;GRID1;TRPC3;SLC24A5;KCNG2;CACNA1A;KCNN1;CNGA2;PKD2L1;RYR3;TRPM2;LRRC18;GRIK3;GABRQ;GRIN3B;KCNE2;HCN4;KCNK2;TRPC6;GABRA3;CCT8L2;KC…	response to radiation	78	0.0109609	ERCC2;ANGPT2;UBE2A;GNB1;FIGNL1;UVSSA;BHLHE40;CHEK2;USP47;HMGN1;N4BP1;FMR1;CYP2R1;ERCC5;VCAM1;H2AFX;ASNS;NMU;IMPACT;GPR88;NPTN;PAXIP1;NEDD4;TANC1;CASP3;FANCG;NABP1;ERCC3;CIRBP;KARS;CABP4;MDM2;NPHP1;RAD9B;OPN3;RRM1;SLC4A10;GEN1;JUN;HAMP;SNAI2;RNF168;SLC1A2;BCL3;PPM1D;JUND;BAX;CDKN1A;PTPRK;ECT2;SPIDR;CREB1;MSH6;NIPBL;PER2;CNGB1;CLOCK;GNA11;YY1;HYAL3;BABAM1;DNMT3A;INIP;INTS3;SPRTN;B4GALT2;RNF8;PPID;F…	Lapatinib	2	0.0468938	CYP2C8;CYP2C19
negative regulation of endoplasmic reticulum calcium ion concentration	1	0.0187553	BAK1	ATPase activity	67	0.00075463	DHX16;MYH14;CCNH;HSPA9;EIF4A1;PCYOX1;PSMD6;ATP6V1H;KATNAL1;MCM6;RFC5;HSPD1;SNRNP200;ERCC2;PEX1;ATP10A;TDRD9;ABCB9;ATP6V0A2;HLTF;TOP2A;TNNT1;KIF5C;KIF18A;KIF24;HSPA8;DDX5;RAD17;ABCC12;DYNLL1;ATP6V0B;DHX30;TAPBP;IDE;ATP13A1;LONP1;DDX17;ERCC6;ATP6V1D;DNAH11;KIF9;ABCD3;SRCAP;LMBRD1;DDX11;KIFC1;ERCC8;ATP8B3;RFC4;SMARCA5;KIF5A;ATP9B;RAD51C;KIF6;ABCG2;MYO1D;ASNA1;MYO19;DDX54;RTEL1;RFC3;MSH2;GTF2H1;CHD1L…	regulation of store-operated calcium channel activity	1	0.0238166	STIM1	cation channel activity	74	1.73666e-11	KCNE1;CHRNB2;SCN8A;GRIK5;GRIN2B;KCNQ2;KCNA1;KCNQ3;SCN11A;CACNG3;KCNB2;GRIN2A;KCNH1;SCN5A;KCNK18;TRPC4;CACNG2;KCNT1;SCN10A;FAM155A;NALCN;OPRM1;KCNK9;SLC24A1;RYR1;OTOP1;CACNA2D4;TMEM63C;KCNT2;CHRNA4;TRPC7;TRPC3;SLC24A5;KCNG2;CACNA1A;KCNN1;CNGA2;PKD2L1;RYR3;TRPM2;GRIK3;GRIN3B;KCNE2;HCN4;KCNK2;TRPC6;CCT8L2;KCNG4;SCN4A;MTMR6;KCNA10;CACNA1E;CNR1;SNAP25;KCNIP3;CACNA1B;CACNA1I;KCND3;KCNIP1;CNGA4;CNGB3;RY…	response to antineoplastic agent	20	0.028113	SMYD3;UGT3A2;FOXO3;FMR1;ASNS;HNRNPD;GBA;RAP1A;ATRX;FOXO1;DHFR;RPL18A;SPIDR;NR3C1;EDN1;AGTR2;PTAFR;TIMELESS;ASS1;PCNA	G protein-coupled receptor signaling pathway	126	0	DEFB4B;JAK2;OR2AE1;SORCS1;PROKR2;AIPL1;GPR26;GPR32;GABRE;OR7A10;CCL13;LHCGR;RGS6;OR5D18;OR10AG1;ADCYAP1R1;MRGPRX3;OR10AD1;OR8I2;MRGPRX1;ADCY8;GRM6;GRIK3;OR3A3;OR5M8;OR7D4;RGS7;TAAR8;OR10G8;HTR5A;RGR;HPGD;OR7C2;OPRM1;OR10P1;CXCR6;GPR50;OR7A17;OR3A2;CCL27;GRM5;OR6T1;OR1A1;CCL2;BHLHA15;GPHB5;NPBWR2;OR8H1;GABRB1;OR1M1;OR5D16;OR5AS1;DRD5;HTR1E;GNB3;OR7G1;OR8K1;CMKLR1;OR5W2;OR1B1;OR4D5;SCT;OR6B2;GNB1L;…
postsynaptic signal transduction	1	0.0210754	JAK2	transcription elongation from RNA polymerase II promoter	19	0.000818295	CCNT1;EAPP;CCNH;HNRNPU;EZH2;ERCC2;IWS1;POLR2J;ENY2;POLR2I;CDK9;RNF8;RNF168;CCNK;SUPT6H;SSRP1;POLR2L;ELP2;GTF2H1	structural constituent of postsynapse	1	0.0267543	ACTN1	ion channel complex	69	1.45116e-10	KCNE1;CHRNB2;SCN8A;GRIK5;SCRIB;GRIN2B;KCNQ2;KCNA1;KCNQ3;SCN11A;CACNG3;GABRR2;BEST2;KCNB2;DPP10;GRIN2A;KCNH1;SCN5A;TRPC4;GLRA1;CACNG2;GABRB1;SCN10A;GABRE;ANO2;RYR1;GABRB3;GABRP;CACNA2D4;GLRA3;CHRNA4;TRPC7;TRPC3;KCNG2;CATSPERG;CACNA1A;KCNN1;PKD2L1;RYR3;LRRC18;DPP6;GRIK3;GABRQ;GRIN3B;KCNE2;HCN4;KCNK2;TRPC6;GABRA3;KCNG4;SCN4A;KCNA10;OLFM3;CACNA1E;SNAP25;KCNIP3;CACNA1B;CACNA1I;KCND3;KCNIP1;RYR2;CACNA1…	negative regulation of transcription by RNA polymerase II	165	4.24397e-07	IGBP1;PHF12;FZD8;KLF3;ETV3;KDM5B;RPL10;LRRFIP1;SOX9;ZNF608;ZNF345;BATF3;GZF1;FOXO3;BHLHE40;CBFB;ARID1A;DNAJB5;ETV6;SQSTM1;MXD1;SATB1;HDAC10;DDIT3;PRDM5;E2F3;IMPACT;DR1;HSBP1;MEPCE;NEDD4;CREM;ZNF131;THRB;TAGLN3;PPARA;SMAD2;TSHZ1;BMP6;THRA;NCK1;UBE2I;TBL1XR1;MDM2;PPARG;PURB;APBB1;RTF1;KLF10;ZBTB5;XPO1;ID1;DMRT1;FST;MLX;ZBTB20;BACH2;UHRF1;NCOA2;SMO;JUN;E2F5;BRMS1L;HAMP;SNAI2;SMAD5;VLDLR;ATRX;VHL;ZNF…	G protein-coupled receptor activity	95	0	OR2AE1;SORCS1;PROKR2;GPR26;GPR32;OR7A10;LHCGR;OR5D18;OR10AG1;ADCYAP1R1;MRGPRX3;OR10AD1;OR8I2;MRGPRX1;GRM6;GRIK3;OR3A3;OR5M8;OR7D4;TAAR8;OR10G8;HTR5A;RGR;HPGD;OR7C2;OPRM1;OR10P1;CXCR6;GPR50;OR7A17;OR3A2;GRM5;OR6T1;OR1A1;NPBWR2;OR8H1;OR1M1;OR5D16;OR5AS1;DRD5;HTR1E;OR7G1;OR8K1;CMKLR1;OR5W2;OR1B1;OR4D5;OR6B2;GPRC5D;HRH4;OR1L3;OR7A5;OR5I1;OR1L6;SORCS3;MRGPRX4;GPR179;OR2Y1;OR10K1;CCR6;OR2Z1;OR5P2;OR1D2…
postsynapse to nucleus signaling pathway	1	0.0210754	JAK2	RNA polymerase II CTD heptapeptide repeat kinase activity	7	0.00097067	CCNH;MAPK1;ERCC2;CDK9;CDK1;CCNK;GTF2H1	G protein-coupled receptor signaling pathway involved in heart process	1	0.0326035	AKAP13	cation channel complex	53	2.97614e-09	KCNE1;SCN8A;GRIK5;GRIN2B;KCNQ2;KCNA1;KCNQ3;SCN11A;CACNG3;KCNB2;DPP10;GRIN2A;KCNH1;SCN5A;TRPC4;CACNG2;SCN10A;RYR1;CACNA2D4;TRPC7;TRPC3;KCNG2;CATSPERG;CACNA1A;KCNN1;PKD2L1;RYR3;DPP6;GRIK3;GRIN3B;KCNE2;HCN4;KCNK2;TRPC6;KCNG4;SCN4A;KCNA10;OLFM3;CACNA1E;SNAP25;KCNIP3;CACNA1B;CACNA1I;KCND3;KCNIP1;RYR2;CACNA1H;SCN9A;HCN1;SHANK1;CALM1;CATSPER1;SACM1L	ATP binding	263	5.36808e-07	KIF27;ADK;ACTR3;ERCC2;EIF2AK2;N4BP2;CDC42BPA;MAP3K8;BBS12;VRK2;UCKL1;NEK9;UBE2A;CDK17;CTPS2;NME4;CBWD2;TTL;BUB1;CDC34;WNK4;FIGNL1;PMVK;TTK;LANCL2;ATP1B1;P2RX2;LARS2;WEE1;ABCD4;MAST2;STK16;UBE2L3;CHEK2;TTLL7;STKLD1;DARS;ETNK1;EPHB4;STK35;PRKD1;P2RX7;HSP90AA1;DDX50;PAPSS2;GALK2;DDR2;ATP6V1B2;ULK2;ABCD3;ASNS;FES;AURKA;ACVR1;DDX24;TGFBR2;ABCB9;EPHA4;CARS;DNAJA2;SIK2;POMK;ADCY3;TXK;RTCB;IDH3G;AAK1;PGK…	signaling receptor activity	133	2.22045e-16	OR2AE1;KIR3DL1;TLR2;SORCS1;ANPEP;PROKR2;GPR26;GPR32;GABRE;GRIN2B;OR7A10;LHCGR;KLRG1;OR5D18;GRIN2A;OR10AG1;ADCYAP1R1;MRGPRX3;OR10AD1;OR8I2;LILRA4;MRGPRX1;KLRB1;CLEC1A;GRM6;GRIK3;OR3A3;OR5M8;NTRK3;OR7D4;ROBO2;TAAR8;OR10G8;DMBT1;HTR5A;RGR;HPGD;OR7C2;OPRM1;OR10P1;CXCR6;GPR50;OR7A17;MED1;OR3A2;GRM5;OR6T1;OR1A1;NPBWR2;LILRA1;CLEC4M;OR8H1;GABRB1;OR1M1;OR5D16;OR5AS1;DRD5;HTR1E;OR7G1;OR8K1;CMKLR1;SIGLEC7;…
calcium ion homeostasis	4	0.0218186	JAK2;BAK1;S100A14;TRPC5	ATPase activity, coupled	55	0.00131614	DHX16;MYH14;CCNH;HSPA9;EIF4A1;PCYOX1;ATP6V1H;KATNAL1;MCM6;RFC5;SNRNP200;ERCC2;PEX1;ATP10A;TDRD9;ABCB9;ATP6V0A2;TOP2A;TNNT1;KIF5C;KIF18A;HSPA8;DDX5;RAD17;ABCC12;DYNLL1;ATP6V0B;DHX30;TAPBP;ATP13A1;LONP1;DDX17;ERCC6;ATP6V1D;DNAH11;ABCD3;LMBRD1;DDX11;ERCC8;ATP8B3;RFC4;KIF5A;ATP9B;RAD51C;ABCG2;MYO1D;DDX54;RTEL1;RFC3;MSH2;GTF2H1;CHD1L;MYL6;DNAH3;RBBP4	detection of calcium ion	1	0.0326035	STIM1	metal ion transmembrane transporter activity	84	2.36518e-08	KCNE1;SCN8A;GRIK5;SLC6A16;GRIN2B;SLC10A2;KCNQ2;KCNA1;KCNQ3;SLC5A2;SCN11A;SLC8A3;CACNG3;KCNB2;GRIN2A;KCNH1;SCN5A;KCNK18;TRPC4;ATP2B2;CACNG2;KCNT1;SCN10A;FAM155A;SLC4A8;NALCN;OPRM1;KCNK9;SLC24A1;RYR1;CACNA2D4;KCNT2;TRPC7;SLC6A1;TRPC3;SLC24A5;KCNG2;CACNA1A;KCNN1;PKD2L1;RYR3;SLC11A2;TRPM2;SLC1A6;GRIK3;GRIN3B;KCNE2;HCN4;SLC6A7;KCNK2;TRPC6;SLC6A3;CCT8L2;KCNG4;ABCB11;SCN4A;MTMR6;SLC6A12;KCNA10;CACNA1E;Z…	RNA polymerase II proximal promoter sequence-specific DNA binding	102	2.97382e-05	SMYD3;SIX4;SMARCD2;LRRFIP1;SOX9;PATZ1;SOX4;BATF3;GZF1;FOXO3;BHLHE40;KLF13;ETV6;NONO;MXD1;RBBP4;DDIT3;PRDM5;ZNF639;GMEB1;SSBP4;TXK;PPARA;SMAD2;ETV4;SMAD1;NRF1;PPARG;KLF7;GMEB2;KLF10;HOXB2;NCOA2;JUN;NKRF;TOX3;SNAI2;SMAD5;HOXC11;ZNF239;NFE2L3;SAFB;PRDM1;ZBTB14;TOP1;TFCP2;ATOH8;JUND;EBF2;MEF2A;ESR2;MBD3;NR4A2;HLTF;HES1;MYOCD;STAT5B;CREB1;NR3C1;HNRNPU;MSGN1;DHX9;CLOCK;CDK9;USP3;NR2C1;RFX1;SOX21;ARID3B…	sensory perception of chemical stimulus	66	2.22045e-16	OR2AE1;OR7A10;OR5D18;OR10AG1;OR10AD1;OR8I2;ASIC2;OR3A3;OR5M8;OR7D4;OR10G8;OR7C2;OR10P1;OR7A17;OR3A2;OR6T1;OR1A1;CNGA2;OR8H1;OR1M1;CST2;OR5D16;OR5AS1;OR7G1;OR8K1;OR5W2;OR1B1;OR4D5;OR6B2;OR1L3;LPO;OR7A5;P2RX3;OR5I1;OR1L6;OR2Y1;OR10K1;OR2Z1;OR5P2;OR1D2;OBP2B;OR5R1;OR8K3;OR6X1;OR4C15;OR2T11;OR10G9;OR8B8;OR56A5;OR1G1;OR1E2;OR10G4;LCN1;OR2C1;OR11H6;SYT10;OR52A5;OBP2A;OR4D1;OR4C12;AZGP1;OR5L1;OR8U1;OR8H…
G protein-coupled receptor binding	3	0.024834	JAK2;S100A14;DEFB4B	electron transport chain	31	0.00298191	UQCRFS1;SDHC;CYC1;GLRX5;TSTA3;UQCR11;NDUFS6;NQO2;GLRX3;NDUFA4;UQCRH;NDUFA6;CDK1;POLG2;DMGDH;NDUFV2;NDUFB9;COX15;NDUFS7;SLC25A22;UQCRC1;COX8C;ALDH4A1;NDUFS8;PHGDH;NDUFB6;IMMP2L;NDUFAB1;NDUFV1;COX6C;GRXCR1	regulation of postsynapse organization	2	0.0338416	ARHGAP33;CUX2	G protein-coupled amine receptor activity	20	5.30681e-07	OR10H2;HTR2A;TAAR9;HRH2;TAAR6;ADRA1B;OR6T1;OR10H5;OR56A5;TAAR5;CHRM3;HTR1E;TAAR2;HTR5A;OR10J5;HRH1;OR10H3;HTR4;OR10H1;TAAR8	RNA polymerase II regulatory region sequence-specific DNA binding	137	5.40183e-05	SMYD3;SIX4;KLF3;ETV3;SMARCD2;LRRFIP1;SOX9;PATZ1;HOXC10;SOX4;BATF3;NFYB;GZF1;FOXO3;BHLHE40;H3F3A;KLF13;ETV6;NONO;MXD1;RBBP4;SATB1;DDIT3;PRDM5;E2F3;CCAR1;ZNF639;GMEB1;HOXC6;SSBP4;CREM;ZNF131;THRB;TXK;PPARA;SMAD2;ETV4;THRA;SMAD1;NRF1;PPARG;PURB;KLF7;GMEB2;KLF10;ZBTB5;DMRT1;NR1I2;MLX;TAL2;HOXB2;BACH2;NCOA2;NME1;JUN;NKRF;TOX3;SNAI2;PCGF5;SMAD5;HOXC11;ZNF239;NFE2L3;IER2;SAFB;ZC3H8;PRDM1;ZBTB14;TOP1;BCL…	detection of chemical stimulus involved in sensory perception of smell	56	2.22045e-15	OR2AE1;OR7A10;OR5D18;OR10AG1;OR10AD1;OR8I2;OR3A3;OR5M8;OR7D4;OR10G8;OR7C2;OR10P1;OR7A17;OR3A2;OR6T1;OR1A1;OR8H1;OR1M1;OR5D16;OR5AS1;OR7G1;OR8K1;OR5W2;OR1B1;OR4D5;OR6B2;OR1L3;OR7A5;OR5I1;OR1L6;OR2Y1;OR10K1;OR2Z1;OR5P2;OR1D2;OR5R1;OR8K3;OR6X1;OR4C15;OR2T11;OR10G9;OR8B8;OR56A5;OR1G1;OR1E2;OR10G4;OR2C1;OR11H6;OR52A5;OR4D1;OR4C12;OR5L1;OR8U1;OR8H3;OR52E6;OR8H2
positive regulation of cytosolic calcium ion concentration	3	0.034047	JAK2;BAK1;TRPC5	regulation of G2/M transition of mitotic cell cycle	27	0.00309271	ORC1;NAE1;CCP110;TUBB;CLSPN;YWHAG;USP47;STOX1;CENPJ;CDK1;SDCCAG8;RAD17;DYNLL1;TUBB4B;DCTN3;CCND1;FBXO5;CDK5RAP3;HAUS2;RAD51C;CEP192;CSNK1D;CNTRL;HMGA2;PRKACA;CEP70;ODF2	positive regulation of adenylate cyclase activity	1	0.0355151	STIM1	voltage-gated ion channel activity	43	1.8278e-06	KCNE1;SCN8A;GRIN2B;KCNQ2;KCNA1;KCNQ3;SCN11A;CACNG3;KCNB2;GRIN2A;KCNH1;SCN5A;KCNK18;CACNG2;KCNT1;SCN10A;NALCN;OPRM1;RYR1;CACNA2D4;KCNT2;KCNG2;CACNA1A;KCNE2;HCN4;KCNK2;KCNG4;SCN4A;KCNA10;CACNA1E;CNR1;SNAP25;KCNIP3;CACNA1B;CACNA1I;KCND3;KCNIP1;CACNA1H;SCN9A;HCN1;CATSPER1;KCNU1;KCNH3	regulation of small GTPase mediated signal transduction	71	6.46089e-05	EPS8;GDI1;PSD4;STAMBP;STARD13;ARFGEF2;CYTH3;ARHGDIB;FAM13A;ARHGAP18;MFN2;SQSTM1;FARP1;ARHGAP20;LPAR6;OCRL;ARHGAP21;ARHGAP33;SRGAP2;ARHGAP12;ITPKB;ARHGAP1;SYNPO2L;ARF6;ARHGAP4;RHOJ;SIPA1L1;CDC42SE2;FGD3;HEG1;RELN;ARAP3;AMOT;ARHGAP26;F2RL3;MET;ARHGAP11B;ARHGEF6;RIT2;FRMD7;ARHGEF18;FARP2;AKAP13;ARHGAP10;BCL6;ARHGAP29;CDC42SE1;GNA13;CRK;TRIP10;KANK1;ECT2;EPS8L3;ARHGEF17;MCF2L;SYDE1;PLEKHG3;MCF2;SRGAP…	detection of chemical stimulus involved in sensory perception	59	8.65974e-15	OR2AE1;OR7A10;OR5D18;OR10AG1;OR10AD1;OR8I2;OR3A3;OR5M8;OR7D4;OR10G8;OR7C2;OR10P1;OR7A17;OR3A2;OR6T1;OR1A1;OR8H1;OR1M1;CST2;OR5D16;OR5AS1;OR7G1;OR8K1;OR5W2;OR1B1;OR4D5;OR6B2;OR1L3;LPO;OR7A5;OR5I1;OR1L6;OR2Y1;OR10K1;OR2Z1;OR5P2;OR1D2;OR5R1;OR8K3;OR6X1;OR4C15;OR2T11;OR10G9;OR8B8;OR56A5;OR1G1;OR1E2;OR10G4;OR2C1;OR11H6;OR52A5;OR4D1;OR4C12;AZGP1;OR5L1;OR8U1;OR8H3;OR52E6;OR8H2
structural constituent of synapse	1	0.0348838	ACTN1	DNA-dependent ATPase activity	18	0.00318678	CCNH;MCM6;RFC5;ERCC2;TOP2A;RAD17;DHX30;ERCC6;DDX11;ERCC8;RFC4;RAD51C;RTEL1;RFC3;MSH2;GTF2H1;CHD1L;RBBP4	negative regulation of pri-miRNA transcription by RNA polymerase II	1	0.0384182	SOX9	voltage-gated channel activity	43	1.8278e-06	KCNE1;SCN8A;GRIN2B;KCNQ2;KCNA1;KCNQ3;SCN11A;CACNG3;KCNB2;GRIN2A;KCNH1;SCN5A;KCNK18;CACNG2;KCNT1;SCN10A;NALCN;OPRM1;RYR1;CACNA2D4;KCNT2;KCNG2;CACNA1A;KCNE2;HCN4;KCNK2;KCNG4;SCN4A;KCNA10;CACNA1E;CNR1;SNAP25;KCNIP3;CACNA1B;CACNA1I;KCND3;KCNIP1;CACNA1H;SCN9A;HCN1;CATSPER1;KCNU1;KCNH3	transcription initiation from RNA polymerase II promoter	44	0.000124643	MED31;ERCC2;SOX9;TAF6L;CBFB;E2F3;DR1;TAF10;PAXIP1;THRB;CCNH;PPARA;ERCC3;THRA;POLR2L;PPARG;MED10;NR1I2;GTF2H1;SUB1;POLR2C;PPM1D;BAX;ESR2;TAF4;CDKN1A;NR4A2;CREB1;MED13;NR3C1;CTNNBIP1;CDK9;NR2C1;POLR2I;NRBP1;CAND1;MAML1;MED17;MED27;POLR2D;NR1H3;NR1D2;RUNX2;TP53	detection of chemical stimulus	61	1.84297e-14	OR2AE1;TLR2;OR7A10;OR5D18;OR10AG1;OR10AD1;OR8I2;OR3A3;OR5M8;OR7D4;OR10G8;OR7C2;OR10P1;OR7A17;OR3A2;OR6T1;OR1A1;OR8H1;OR1M1;CST2;OR5D16;OR5AS1;OR7G1;OR8K1;OR5W2;OR1B1;OR4D5;OR6B2;OR1L3;LPO;OR7A5;OR5I1;OR1L6;OR2Y1;OR10K1;OR2Z1;OR5P2;OR1D2;OR5R1;OR8K3;OR6X1;OR4C15;OR2T11;OR10G9;OR8B8;TREM2;OR56A5;OR1G1;OR1E2;OR10G4;OR2C1;OR11H6;OR52A5;OR4D1;OR4C12;AZGP1;OR5L1;OR8U1;OR8H3;OR52E6;OR8H2
regulation of cytosolic calcium ion concentration	3	0.0468019	JAK2;BAK1;TRPC5	negative regulation of transcription elongation from RNA polymerase II promoter	5	0.00322601	EAPP;HNRNPU;EZH2;RNF8;RNF168	negative regulation of transcription by RNA polymerase II	6	0.0387339	ZNF613;BTG2;ARX;SOX9;CUX2;FBP1	voltage-gated cation channel activity	34	2.5009e-06	KCNE1;GRIN2B;KCNQ2;KCNA1;KCNQ3;CACNG3;KCNB2;GRIN2A;KCNH1;KCNK18;CACNG2;KCNT1;OPRM1;RYR1;CACNA2D4;KCNT2;KCNG2;CACNA1A;KCNE2;HCN4;KCNK2;KCNG4;KCNA10;CACNA1E;CNR1;SNAP25;CACNA1B;CACNA1I;KCND3;CACNA1H;HCN1;CATSPER1;KCNU1;KCNH3	DNA-binding transcription repressor activity, RNA polymerase II-specific	58	0.000203751	ETV3;KDM5B;LRRFIP1;BATF3;GZF1;FOXO3;BHLHE40;ETV6;MXD1;SATB1;PRDM5;E2F3;CREM;ZNF131;PPARA;TSHZ1;PPARG;PURB;ZBTB5;MLX;ZBTB20;BACH2;E2F5;SNAI2;ZNF239;NFE2L3;FOXO1;ZC3H8;PRDM1;ZBTB14;BCL6;HES1;NR2C1;CDX2;ZNF668;MNT;TFAP2A;ZNF263;YY1;MYPOP;ARID5B;MYEF2;ELK3;SNAI3;ETS2;PROX2;INSM1;OVOL2;TSHZ2;E2F8;TGIF1;NFXL1;ENO1;AEBP2;BHLHE41;ETV7;NR1D2;MYC	gated channel activity	43	1.17372e-09	CATSPER2;RYR3;GABRE;GRIN2B;PIEZO2;KCNB2;GRIN2A;KCNA1;ASIC2;SCN4A;GRIK3;KCNT2;OPRM1;ASIC5;KCNK18;KCNQ3;CNGA2;GABRB1;CLCN6;CACNG2;GLRA1;KCNA4;P2RX3;KCNIP4;JPH3;KCNT1;CNGB3;KCNV1;GABRA6;CACNG3;GABRA4;CLCN7;GRIK5;NMUR2;GRIA2;GABRP;NALCN;SCN5A;TMEM63C;SCN11A;KCNQ2;CACNA1A;CATSPER1
homeostasis of number of cells	5	0.000270694	JAK2;TRIM58;BAK1;UBAP2L;HBZ	transcription by RNA polymerase I	14	0.0038625	CCNH;NCL;HEATR1;ERCC2;CD3EAP;PWP1;H2AFY2;ERCC6;DDX11;POLR1C;POLR1E;POLR2L;GTF2H1;UBTF	calcium-activated potassium channel activity	1	0.0441985	KCNN4	synaptic signaling	110	5.10647e-06	CHRNB2;SLC22A2;WNT7A;BSN;GRIK5;SCRIB;GRIN2B;NTF3;KCNQ2;KCNA1;OR10H2;KCNQ3;HTR2A;GRM6;ADIPOQ;HRH2;SLC8A3;DCC;CACNG3;GABRR2;GRIN2A;APBA3;PRKCB;OR6T1;OR10H5;HCRTR2;OR56A5;GLRA1;SYBU;CACNG2;GABRB1;SYT11;TMEM108;GABRE;EPHB1;CDH8;OPRM1;SLC24A1;CHRM3;HTR1E;GABRB3;GABRP;ADCY8;KIF5A;GLRA3;LIN7C;CHRNA4;GRID1;NGF;SLC6A1;DGKI;CACNA1A;CRH;GABBR2;KCNN1;HRAS;SLC17A6;SYT8;SLC1A6;FGF14;GRIK3;GABRQ;NPS;ARF1;HTR5A;…	GTPase binding	120	0.000250344	EPS8;GDI1;RALGDS;TBC1D25;PARD6G;TBC1D22B;PFN1;PSD4;ERC1;GNB1;BIRC5;ARFGEF2;TBC1D10B;ACAP2;CYTH3;ARHGDIB;DOCK10;HSP90AA1;EIF2B3;FARP1;DOCK5;OCRL;MICALL1;SRGAP2;RCBTB2;TNPO2;RAPGEF4;RAPGEF2;SORL1;DENND5B;HPS6;ARHGAP1;RABGAP1L;EXOC1;FRS3;TBC1D4;DENND5A;RANBP1;ARHGAP4;EIF2B1;XPO1;NUTF2;PSPN;RAP1A;DLG2;CDC42SE2;FGD3;TBC1D15;MET;EIF2B4;FGF20;IPO13;ARHGEF6;FNBP1L;DAAM1;IL5;RAB34;IQGAP1;ARHGEF18;FARP2;AK…	ion gated channel activity	42	1.67494e-09	CATSPER2;RYR3;GABRE;GRIN2B;KCNB2;GRIN2A;KCNA1;ASIC2;SCN4A;GRIK3;KCNT2;OPRM1;ASIC5;KCNK18;KCNQ3;CNGA2;GABRB1;CLCN6;CACNG2;GLRA1;KCNA4;P2RX3;KCNIP4;JPH3;KCNT1;CNGB3;KCNV1;GABRA6;CACNG3;GABRA4;CLCN7;GRIK5;NMUR2;GRIA2;GABRP;NALCN;SCN5A;TMEM63C;SCN11A;KCNQ2;CACNA1A;CATSPER1
myeloid cell homeostasis	4	0.00036647	JAK2;TRIM58;BAK1;HBZ	ER to Golgi transport vesicle membrane	13	0.004817	PDCD6;SEC24D;HLA-F;GOSR2;KLHL12;CNIH1;MCFD2;SEC23A;LMAN1;SEC13;STX5;VTI1A;HLA-DPA1	positive regulation of calcium ion transport	2	0.0454743	BAK1;STIM1	calcium ion transport	71	5.4026e-06	CHRNB2;FGF2;GRIN2B;CCL4L1;HTR2A;GRM6;CCL3;SLC8A3;CD84;RCVRN;CACNG3;GRIN2A;PRKCB;PMPCA;TRPC4;ATP2B2;ADCYAP1R1;CACNG2;PHB;FFAR1;FAM155A;NALCN;TRDN;OPRM1;SLC24A1;RYR1;NMUR2;ANK2;CCL8;CACNA2D4;PLCG2;CHRNA4;TRPC7;LILRB1;TRPC3;SLC24A5;BDKRB1;CACNA1A;CRH;FCRL3;PKD2L1;CCL2;RYR3;TRPM2;FGF14;GRIN3B;KCNE2;TRPC6;DHRS7C;STAC;METTL21C;CACNA1E;UBASH3B;CACNA1B;CACNA1I;CEMIP;PLCZ1;RYR2;JPH3;CACNA1H;WNT3A;P2RX3;PD…	RNA polymerase II transcription factor complex	38	0.000352339	MED31;ERCC2;TLE1;TAF6L;NFYB;BCL9;CBFB;NONO;DDIT3;E2F3;TAF10;THRB;CCNH;PPARA;ERCC3;MMS19;SMAD2;THRA;PPARG;NR1I2;JUN;E2F5;GTF2H1;JUND;TAF4;CREB1;HNRNPU;LDB1;E2F8;MED17;TLE4;TCF7L2;ING2;HNRNPAB;PYGO2;NR1H3;NR1D2;TP53	ion channel activity	48	1.75623e-09	CATSPER2;TRPC5;KCNK9;RYR3;GABRE;GRIN2B;PIEZO2;OTOP1;KCNB2;GRIN2A;KCNA1;ASIC2;SCN4A;GRIK3;KCNT2;OPRM1;LRRC8E;TMEM38A;ASIC5;KCNK18;KCNQ3;CNGA2;GABRB1;CLCN6;CACNG2;GLRA1;KCNA4;P2RX3;KCNIP4;JPH3;KCNT1;CNGB3;KCNV1;GABRA6;CACNG3;GABRA4;CLCN7;GRIK5;NMUR2;GRIA2;GABRP;NALCN;SCN5A;TMEM63C;SCN11A;KCNQ2;CACNA1A;CATSPER1
acetylcholine receptor regulator activity	2	0.000418826	PATE1;PATE4	mitochondrial ATP synthesis coupled electron transport	17	0.00517265	UQCRFS1;SDHC;CYC1;NDUFS6;NDUFA4;UQCRH;NDUFA6;CDK1;NDUFV2;NDUFB9;COX15;NDUFS7;UQCRC1;NDUFS8;NDUFB6;NDUFAB1;NDUFV1	vacuolar lumen	5	0.000156917	NAPRT;FMOD;ARSA;CTSK;LYZ	G protein-coupled neurotransmitter receptor activity	15	5.40578e-06	OR10H2;HTR2A;HRH2;OR6T1;OR10H5;OPRM1;CHRM3;HTR1E;GABBR2;HTR5A;OR10J5;HRH1;OR10H3;HTR4;OR10H1	regulation of GTPase activity	91	0.000389695	GDI1;LRCH1;TBC1D25;RSU1;TBC1D22B;RGS1;STARD13;TBC1D10B;ACAP2;PLCB1;ARHGDIB;FAM13A;DOCK10;ARHGAP18;EIF5;ARHGAP20;OCRL;ARHGAP21;BNIP2;EPHA4;ARHGAP33;SRGAP2;APC2;ARFGAP2;RAPGEF2;TBC1D19;ELMOD1;ARHGAP12;ARHGAP1;RABGAP1L;TBC1D4;AGFG1;RANBP1;ARHGAP4;GSK3B;ARFGAP3;RAP1A;PRTN3;SIPA1L1;JUN;FGD3;TBC1D15;CAV2;ARAP3;AMOT;DEPDC5;ARHGAP26;ARHGAP11B;ARHGEF6;PAFAH1B1;IQGAP1;ARHGAP10;BCL6;ARHGAP29;GNB5;CDC42SE1;C…	cation channel activity	38	3.70349e-08	CATSPER2;TRPC5;KCNK9;RYR3;GRIN2B;PIEZO2;OTOP1;KCNB2;GRIN2A;KCNA1;ASIC2;SCN4A;GRIK3;KCNT2;OPRM1;TMEM38A;ASIC5;KCNK18;KCNQ3;CNGA2;CACNG2;KCNA4;P2RX3;KCNIP4;JPH3;KCNT1;CNGB3;KCNV1;CACNG3;GRIK5;GRIA2;NALCN;SCN5A;TMEM63C;SCN11A;KCNQ2;CACNA1A;CATSPER1
neurotransmitter receptor regulator activity	2	0.000418826	PATE1;PATE4	cytochrome complex	9	0.00647059	UQCRFS1;CYC1;NDUFA4;UQCRH;COX15;BCS1L;UQCRC2;UQCRC1;COX8C	secretory granule lumen	6	0.000387788	CDC37L1;NAPRT;ACTN1;ARSA;LYZ;CTSW	chemical synaptic transmission	108	6.09168e-06	CHRNB2;SLC22A2;WNT7A;BSN;GRIK5;SCRIB;GRIN2B;NTF3;KCNQ2;KCNA1;OR10H2;KCNQ3;HTR2A;GRM6;ADIPOQ;HRH2;SLC8A3;DCC;CACNG3;GABRR2;GRIN2A;APBA3;PRKCB;OR6T1;OR10H5;HCRTR2;OR56A5;GLRA1;SYBU;CACNG2;GABRB1;SYT11;TMEM108;GABRE;EPHB1;CDH8;OPRM1;SLC24A1;CHRM3;HTR1E;GABRB3;GABRP;ADCY8;KIF5A;GLRA3;LIN7C;CHRNA4;GRID1;NGF;SLC6A1;DGKI;CACNA1A;CRH;GABBR2;KCNN1;HRAS;SLC17A6;SYT8;SLC1A6;FGF14;GRIK3;GABRQ;NPS;ARF1;HTR5A;…	enzyme linked receptor protein signaling pathway	169	0.00109474	EPS8;ACTR3;XIAP;FKBP1A;ANGPT2;FKBP8;AGT;NEO1;SOX9;ARPC5;TTK;FOXO3;BCL9;PLCB1;EPHB4;PDCD6;ZNF703;PRKD1;HSP90AA1;PLCG1;DDR2;ATP6V1B2;F3;NPTN;ACVR1;NEDD4;TGFBR2;EPHA4;PHIP;GHR;SIK2;CASP3;FMOD;RBM14-RBM4;AP2B1;RAPGEF2;FAM89B;SMAD2;PLEKHA1;ZFAND2B;EFNA3;PPP2R5B;PRL;ADIPOR1;BMP6;CDK5R1;NCK1;EPGN;POLR2L;CBLC;FRS3;SMAD1;TIAL1;FZD4;PTK6;GDF9;AHI1;LTBP1;KLF10;PDGFRL;EPHA7;WASF2;ID1;DMRT1;FST;COL4A3;VWA2;IN…	synaptic signaling	60	1.00965e-06	JAK2;GABRE;GRIN2B;SLC6A2;NRG1;GRIN2A;TNR;SLC1A6;KCNA1;OPHN1;ADCY8;ASIC2;GRM6;AMPH;WNT7A;GRIK3;NPAS4;PRKCB;HTR5A;OPRM1;RIMBP2;GRM5;OR6T1;KCNQ3;GABRB1;GAD2;DRD5;HTR1E;CACNG2;HRH4;GLRA1;P2RX3;JPH3;SORCS3;GABRA6;DBH;FGF14;CACNG3;EPHB1;GABRA4;SLC17A6;GRIK5;GRIA2;GABRP;NAPB;CDH8;SLC6A9;SLC5A7;OR56A5;KCNQ2;NPS;NPY5R;NCDN;SYT10;CACNA1A;HTR2A;NTF3;HRH2;DCC;IGSF9B
erythrocyte maturation	2	0.000562113	TRIM58;HBZ	polysaccharide metabolic process	20	0.00654381	GSK3B;IGF2;PHKA2;HMGB1;GYG1;CHST1;B4GAT1;CLTC;RB1CC1;PHKA1;PHKG2;CSGALNACT2;B3GNT3;NDST2;DYRK2;NHLRC1;B3GNT4;PHKB;EXT2;UGP2	cytoplasmic vesicle lumen	6	0.00050202	CDC37L1;NAPRT;ACTN1;ARSA;LYZ;CTSW	endogenous lipid antigen binding	5	1.20426e-05	CD1A;CD1C;CD1D;CD1B;CD1E	Ras GTPase binding	97	0.00194772	EPS8;GDI1;TBC1D25;PARD6G;TBC1D22B;PFN1;ERC1;BIRC5;TBC1D10B;ACAP2;ARHGDIB;FARP1;OCRL;MICALL1;SRGAP2;RCBTB2;TNPO2;RAPGEF4;RAPGEF2;DENND5B;HPS6;ARHGAP1;RABGAP1L;EXOC1;FRS3;TBC1D4;DENND5A;RANBP1;ARHGAP4;XPO1;NUTF2;PSPN;RAP1A;DLG2;CDC42SE2;FGD3;TBC1D15;MET;FGF20;IPO13;ARHGEF6;DAAM1;IL5;RAB34;IQGAP1;ARHGEF18;FARP2;AKAP13;EXPH5;WAS;CDC42SE1;GNA13;DENND4C;FGF8;NRG4;EREG;DENND2A;KPNB1;ECT2;EPS8L3;ARHGEF17…	chemical synaptic transmission	59	1.16751e-06	JAK2;GABRE;GRIN2B;SLC6A2;GRIN2A;TNR;SLC1A6;KCNA1;OPHN1;ADCY8;ASIC2;GRM6;AMPH;WNT7A;GRIK3;NPAS4;PRKCB;HTR5A;OPRM1;RIMBP2;GRM5;OR6T1;KCNQ3;GABRB1;GAD2;DRD5;HTR1E;CACNG2;HRH4;GLRA1;P2RX3;JPH3;SORCS3;GABRA6;DBH;FGF14;CACNG3;EPHB1;GABRA4;SLC17A6;GRIK5;GRIA2;GABRP;NAPB;CDH8;SLC6A9;SLC5A7;OR56A5;KCNQ2;NPS;NPY5R;NCDN;SYT10;CACNA1A;HTR2A;NTF3;HRH2;DCC;IGSF9B
female genitalia development	2	0.000815395	BAK1;TBX3	antigen processing and presentation of exogenous antigen	23	0.00675652	ARF1;CTSV;SEC24D;ACTR1B;HLA-DMB;HLA-F;DCTN5;CAPZA1;KIF18A;CLTC;DYNLL1;TAPBP;SEC23A;FCGR2B;DCTN3;SNAP23;VAMP3;SEC13;KIF5A;OSBPL1A;CD1A;HLA-DPA1;CD1B	vesicle lumen	6	0.000509946	CDC37L1;NAPRT;ACTN1;ARSA;LYZ;CTSW	exogenous lipid antigen binding	5	1.20426e-05	CD1A;CD1C;CD1D;CD1B;CD1E	DNA damage response, signal transduction by p53 class mediator resulting in cell cycle arrest	16	0.00269904	SOX4;CNOT10;CHEK2;AURKA;CNOT6;GTSE1;MDM2;BAX;CDKN1A;MDM4;PIDD1;CASP2;E2F8;PCNA;CDK2;TP53	ion channel complex	32	5.22622e-06	CATSPER2;TRPC5;RYR3;GABRE;GRIN2B;DPP6;KCNB2;GRIN2A;KCNA1;VWC2;SCN4A;GRIK3;DPP10;LRRC8E;KCNQ3;GABRB1;CACNG2;GLRA1;KCNA4;KCNIP4;KCNV1;GABRA6;CACNG3;GABRA4;GRIK5;GRIA2;GABRP;SCN5A;SCN11A;KCNQ2;CACNA1A;CATSPER1
glutathione derivative metabolic process	2	0.00122372	GSTA1;GSTM5	postsynaptic endosome	5	0.00752937	ARC;ABHD17B;GRIPAP1;PICK1;PSD	platelet dense granule lumen	2	0.000790167	CDC37L1;CTSW	G protein-coupled serotonin receptor signaling pathway	13	1.22141e-05	OR10H2;HTR2A;HRH2;OR6T1;OR10H5;CHRM3;HTR1E;HTR5A;OR10J5;HRH1;OR10H3;HTR4;OR10H1	response to antimetabolite	6	0.00288444	FMR1;ASNS;ATRX;DHFR;SPIDR;TIMELESS	voltage-gated ion channel activity	24	8.54555e-06	CATSPER2;GRIN2B;KCNB2;GRIN2A;KCNA1;SCN4A;KCNT2;OPRM1;KCNK18;KCNQ3;CLCN6;CACNG2;KCNA4;KCNIP4;KCNT1;KCNV1;CACNG3;CLCN7;NALCN;SCN5A;SCN11A;KCNQ2;CACNA1A;CATSPER1
glutathione derivative biosynthetic process	2	0.00122372	GSTA1;GSTM5	oxidoreductase activity, acting on diphenols and related substances as donors, cytochrome as acceptor	4	0.00947109	UQCRFS1;UQCR11;UQCRH;UQCRC1	fibroblast apoptotic process	2	0.00147056	BAK1;CFDP1	G protein-coupled serotonin receptor activity	13	1.22141e-05	OR10H2;HTR2A;HRH2;OR6T1;OR10H5;CHRM3;HTR1E;HTR5A;OR10J5;HRH1;OR10H3;HTR4;OR10H1	ATP metabolic process	50	0.00291142	COX7C;ALDOA;FIGNL1;NDUFAF1;ATP1B1;SDHC;NDUFS4;P2RX7;ATP6V1B2;ENO3;PGK1;PPARA;ENO2;GAPDH;ZBTB20;SLC25A12;NDUFB2;NDUFS8;EIF6;LDHC;NDUFS2;ENO4;BAD;GALK1;PRKAG2;AK4;SLC25A13;NDUFB4;PPIF;PGAM1;CYC1;GUK1;ADPGK;NDUFB7;HDAC4;NDUFA4;PFKFB1;UQCC2;COX15;UQCRC1;FBP1;UQCRFS1;PID1;ENO1;UQCRC2;NDUFV3;DNAJC30;INSR;ECD;NDUFA6	voltage-gated channel activity	24	8.54555e-06	CATSPER2;GRIN2B;KCNB2;GRIN2A;KCNA1;SCN4A;KCNT2;OPRM1;KCNK18;KCNQ3;CLCN6;CACNG2;KCNA4;KCNIP4;KCNT1;KCNV1;CACNG3;CLCN7;NALCN;SCN5A;SCN11A;KCNQ2;CACNA1A;CATSPER1
glutathione transferase activity	2	0.00171138	GSTA1;GSTM5	extrinsic component of presynaptic membrane	3	0.00948367	DGKI;CTNNA2;PHB	oligosaccharide biosynthetic process	2	0.00147056	FBP1;B3GALNT1	calcium channel activity	29	1.30813e-05	GRIN2B;CACNG3;GRIN2A;TRPC4;CACNG2;FAM155A;OPRM1;SLC24A1;RYR1;CACNA2D4;TRPC7;TRPC3;SLC24A5;CACNA1A;PKD2L1;RYR3;TRPM2;GRIN3B;TRPC6;CACNA1E;CNR1;CACNA1B;CACNA1I;RYR2;JPH3;CACNA1H;PDE2A;SLC24A2;CATSPER1	ATP generation from ADP	20	0.00298834	ALDOA;P2RX7;ENO3;PGK1;PPARA;ENO2;GAPDH;ZBTB20;EIF6;ENO4;GALK1;PRKAG2;PGAM1;ADPGK;HDAC4;PFKFB1;FBP1;ENO1;INSR;ECD	cation channel complex	25	1.74673e-05	CATSPER2;TRPC5;RYR3;GRIN2B;DPP6;KCNB2;GRIN2A;KCNA1;VWC2;SCN4A;GRIK3;DPP10;KCNQ3;CACNG2;KCNA4;KCNIP4;KCNV1;CACNG3;GRIK5;GRIA2;SCN5A;SCN11A;KCNQ2;CACNA1A;CATSPER1
erythrocyte differentiation	3	0.0021715	JAK2;TRIM58;HBZ	termination of RNA polymerase I transcription	8	0.0117797	CCNH;ERCC2;CD3EAP;POLR1C;POLR1E;POLR2L;GTF2H1;UBTF	CoA hydrolase activity	2	0.00147056	NUDT7;ACOT2	presynaptic membrane	35	1.76207e-05	CHRNB2;GRIK5;CTNNA2;SCRIB;KCNA1;HTR2A;GRM6;GRIN2A;KCNH1;GLRA1;PHB;CADM3;SYT11;SCN10A;OPRM1;CHRM3;ADCY8;CHRNA4;SLC6A1;DGKI;LRRC4B;SLC1A6;GRIK3;CNTN1;FBXO45;SLC6A3;SNCAIP;ZDHHC17;CNR1;SNAP25;STXBP1;P2RX3;PDE2A;EFNB3;CNTN5	potassium channel inhibitor activity	5	0.00373556	WNK4;WNK3;CAV3;CAV1;ENSA	synaptic transmission, glutamatergic	14	4.47147e-05	TNR;OPHN1;GRM6;GRIK3;GRM5;CACNG2;CACNG3;SLC17A6;GRIK5;GRIA2;NAPB;CDH8;NPS;HTR2A
regulation of endopeptidase activity	5	0.00225584	JAK2;BAK1;SERPINB7;SERPINB3;ANXA8	intracellular estrogen receptor signaling pathway	12	0.0126981	SAFB;FOXA1;KMT2D;PADI2;DDX5;DDRGK1;DDX17;CNOT1;NCOA6;WBP2;DDX54;RUNX1	platelet dense granule	2	0.00179899	CDC37L1;CTSW	cation transport	158	2.13298e-05	KCNE1;CHRNB2;SLC22A2;COX8C;SCN8A;FGF2;GRIN2B;SLC10A2;KCNQ2;CCL4L1;KCNA1;KCNQ3;HTR2A;GRM6;CCL3;SLC5A2;SCN11A;SLC8A3;CD84;RCVRN;CACNG3;FTL;VAMP3;KCNB2;DPP10;GRIN2A;KCNH1;SCN5A;KCNK18;PRKCB;PMPCA;TRPC4;ATP2B2;ADCYAP1R1;COX7B2;OR56A5;CACNG2;PHB;VIP;SYT11;KCNT1;FFAR1;SCN10A;FAM155A;SLC4A8;NALCN;TRDN;OPRM1;KCNK9;SLC24A1;RYR1;NMUR2;OTOP1;ANK2;CCL8;CACNA2D4;TMEM63C;PLCG2;KCNT2;FTMT;CHRNA4;TRPC7;LILRB1;TR…	regulation of ATP biosynthetic process	15	0.00484482	P2RX7;PPARA;ZBTB20;SLC25A12;EIF6;PRKAG2;PGAM1;HDAC4;PFKFB1;FBP1;PID1;ENO1;DNAJC30;INSR;ECD	ligand-gated ion channel activity	18	4.96882e-05	RYR3;GABRE;GRIN2B;GRIN2A;ASIC2;GRIK3;ASIC5;CNGA2;GABRB1;GLRA1;P2RX3;JPH3;CNGB3;GABRA6;GABRA4;GRIK5;GRIA2;GABRP
erythrocyte development	2	0.0024303	TRIM58;HBZ	phosphorylation of RNA polymerase II C-terminal domain	4	0.014503	PPIL4;CDK9;CCNK;GTF2H1	neuronal stem cell population maintenance	2	0.00197508	SS18;FANCC	potassium channel activity	29	2.15143e-05	KCNE1;GRIK5;KCNQ2;KCNA1;KCNQ3;KCNB2;KCNH1;KCNK18;KCNT1;KCNK9;KCNT2;KCNG2;KCNN1;PKD2L1;GRIK3;KCNE2;HCN4;KCNK2;CCT8L2;KCNG4;MTMR6;KCNA10;SNAP25;KCNIP3;KCND3;KCNIP1;HCN1;KCNU1;KCNH3	retrograde vesicle-mediated transport, Golgi to ER	21	0.00523888	TMED3;COPG2;BNIP1;ARFGAP2;RER1;COPZ1;KDELR3;ERGIC3;SCYL1;KIF2A;ARFGAP3;PITPNB;RAB1A;ATP9B;ATP9A;RINT1;KIF3C;TAPBP;SURF4;ARFGAP1;KDELR1	ligand-gated channel activity	18	4.96882e-05	RYR3;GABRE;GRIN2B;GRIN2A;ASIC2;GRIK3;ASIC5;CNGA2;GABRB1;GLRA1;P2RX3;JPH3;CNGB3;GABRA6;GABRA4;GRIK5;GRIA2;GABRP
erythrocyte homeostasis	3	0.00272044	JAK2;TRIM58;HBZ	vesicle targeting, rough ER to cis-Golgi	13	0.0167909	PDCD6;SEC24D;TRAPPC4;GOSR2;KLHL12;CNIH1;MCFD2;SEC23A;LMAN1;SERPINA1;SEC13;STX5;CSNK1D	azurophil granule lumen	3	0.00251671	NAPRT;ARSA;LYZ	calcium ion transmembrane transporter activity	31	2.2854e-05	GRIN2B;SLC8A3;CACNG3;GRIN2A;TRPC4;ATP2B2;CACNG2;FAM155A;OPRM1;SLC24A1;RYR1;CACNA2D4;TRPC7;TRPC3;SLC24A5;CACNA1A;PKD2L1;RYR3;TRPM2;GRIN3B;TRPC6;CACNA1E;CNR1;CACNA1B;CACNA1I;RYR2;JPH3;CACNA1H;PDE2A;SLC24A2;CATSPER1	ATP biosynthetic process	26	0.00548249	ALDOA;P2RX7;ENO3;PGK1;PPARA;ENO2;GAPDH;ZBTB20;SLC25A12;EIF6;LDHC;ENO4;GALK1;PRKAG2;SLC25A13;PGAM1;CYC1;ADPGK;HDAC4;PFKFB1;FBP1;PID1;ENO1;DNAJC30;INSR;ECD	ion transmembrane transporter activity	64	9.70772e-05	SLC35A5;CATSPER2;TRPC5;SLC5A2;KCNK9;RYR3;GABRE;GRIN2B;SLC6A2;PIEZO2;OTOP1;KCNB2;GRIN2A;SLC26A5;SLC1A6;KCNA1;ASIC2;SCN4A;GRIK3;KCNT2;OPRM1;LRRC8E;TMEM38A;ASIC5;KCNK18;KCNQ3;CNGA2;GABRB1;SLC2A9;CLCN6;CACNG2;COX7B2;GLRA1;KCNA4;P2RX3;KCNIP4;JPH3;KCNT1;CNGB3;KCNV1;GABRA6;SLCO3A1;ATP2B2;CACNG3;GABRA4;SLC22A14;CLCN7;SLC17A6;GRIK5;COX8C;NMUR2;GRIA2;GABRP;NALCN;SCN5A;TMEM63C;SCN11A;SLC6A9;SLC5A7;KCNQ2;CAC…
regulation of peptidase activity	5	0.00294434	JAK2;BAK1;SERPINB7;SERPINB3;ANXA8	integral component of peroxisomal membrane	5	0.0196394	PEX10;PEX26;PEX11G;FAR2;FIS1	positive regulation of positive chemotaxis	2	0.00255025	F3;ITGA2	Calcium signaling pathway	38	2.36164e-05	TRHR;MYLK4;HTR2A;HRH2;SLC8A3;GRIN2A;ADRA1B;PRKCB;ATP2B2;CHRM3;RYR1;MYLK3;ADCY8;PLCG2;CCKBR;BDKRB1;CACNA1A;LHCGR;RYR3;GNA15;HTR5A;BDKRB2;CYSLTR2;GNAL;CACNA1E;CAMK4;HRH1;SLC25A31;CACNA1B;CACNA1I;TACR3;PLCZ1;RYR2;HTR4;CACNA1H;P2RX3;CALM1;SPHK1	AMPK signaling pathway	27	0.00571759	PPP2R1B;FOXO3;PPP2R3A;RAB2A;PPP2R5B;ADIPOR1;PPARG;LEPR;FOXO1;CAB39;PPP2R1A;PRKAG2;CPT1A;CREB1;TBC1D1;PFKFB1;PRKAB1;FBP1;SCD5;SREBF1;AKT2;STRADB;CREB5;AKT3;INSR;TSC1;AKT1S1	extracellular ligand-gated ion channel activity	12	0.000117041	GABRE;GRIN2B;GRIN2A;GRIK3;GABRB1;GLRA1;P2RX3;GABRA6;GABRA4;GRIK5;GRIA2;GABRP
appendage morphogenesis	3	0.00504104	BAK1;HOXA10;TBX3	antigen processing and presentation of exogenous peptide antigen via MHC class II	17	0.0212249	ARF1;CTSV;SEC24D;ACTR1B;HLA-DMB;DCTN5;CAPZA1;KIF18A;CLTC;DYNLL1;SEC23A;FCGR2B;DCTN3;SEC13;KIF5A;OSBPL1A;HLA-DPA1	regulation of positive chemotaxis	2	0.00275745	F3;ITGA2	ligand-gated ion channel activity	31	3.08618e-05	CHRNB2;GRIK5;GRIN2B;GABRR2;GRIN2A;GLRA1;GABRB1;GABRE;RYR1;GABRB3;GABRP;GLRA3;CHRNA4;GRID1;CNGA2;RYR3;TRPM2;GRIK3;GABRQ;GRIN3B;KCNE2;HCN4;GABRA3;KCNA10;CNGA4;CNGB3;RYR2;JPH3;HTR3E;P2RX3;HCN1	Wnt signaling pathway	82	0.00574415	JADE1;EDA;XIAP;LRP5L;TLE1;FZD8;PFN1;SOX9;GNB1;SOX4;FOXO3;BCL9;USP47;CBFB;PLCB1;TNRC6A;ZNF703;BCL7B;DDIT3;MLLT3;FBXW4;CAPRIN2;AMER1;APC2;AP2B1;KREMEN2;LRP6;AMER2;TBL1XR1;FZD4;SHISA6;GSK3B;RTF1;VANGL1;BICC1;CCNY;FRAT1;GPC4;GPC6;DDX3X;TSKU;MARK1;MDFIC;AXIN2;ZNRF3;SNAI2;TRPM4;MET;FOXO1;SULF1;CTDNEP1;DAAM1;USP34;FBXW11;G3BP1;KREMEN1;PPP2R1A;FGF8;LRP5;NR4A2;KANK1;CSNK2A2;AGO2;CTNNBIP1;LDB1;RNF138;HBP1;…	cation transmembrane transporter activity	50	0.000118306	CATSPER2;TRPC5;SLC5A2;KCNK9;RYR3;GRIN2B;SLC6A2;PIEZO2;OTOP1;KCNB2;GRIN2A;SLC1A6;KCNA1;ASIC2;SCN4A;GRIK3;KCNT2;OPRM1;TMEM38A;ASIC5;KCNK18;KCNQ3;CNGA2;SLC2A9;CACNG2;COX7B2;KCNA4;P2RX3;KCNIP4;JPH3;KCNT1;CNGB3;KCNV1;ATP2B2;CACNG3;SLC22A14;GRIK5;COX8C;GRIA2;NALCN;SCN5A;TMEM63C;SCN11A;SLC6A9;SLC5A7;KCNQ2;CACNA1A;ATP13A5;SLC2A8;CATSPER1
limb morphogenesis	3	0.00504104	BAK1;HOXA10;TBX3	transcription initiation from RNA polymerase I promoter	8	0.0242594	CCNH;ERCC2;CD3EAP;POLR1C;POLR1E;POLR2L;GTF2H1;UBTF	negative regulation of cartilage development	2	0.00275745	CTSK;SOX9	ligand-gated channel activity	31	3.08618e-05	CHRNB2;GRIK5;GRIN2B;GABRR2;GRIN2A;GLRA1;GABRB1;GABRE;RYR1;GABRB3;GABRP;GLRA3;CHRNA4;GRID1;CNGA2;RYR3;TRPM2;GRIK3;GABRQ;GRIN3B;KCNE2;HCN4;GABRA3;KCNA10;CNGA4;CNGB3;RYR2;JPH3;HTR3E;P2RX3;HCN1	regulation of carbohydrate metabolic process	34	0.00609553	SLC35B4;COX11;MIDN;P2RX7;PPARA;ADIPOR1;PDK1;LEPR;GSK3B;ZBTB20;SLC25A12;NCOA2;EIF6;FOXO1;PPP1R3B;BAD;PRKCE;PRKAG2;PGAM1;MAEA;RANBP2;HDAC4;P2RY1;PTAFR;PFKFB1;GCG;SOGA1;FBP1;SUPT20H;AKT2;INPP5K;MLXIP;INSR;ECD	integral component of synaptic membrane	18	0.000188555	CADM3;GRIN2A;SLC1A6;KCNA1;ADCY8;NTRK3;HTR5A;OPRM1;CACNG2;GLRA1;P2RX3;SORCS3;CACNG3;GABRA4;GRIK5;SLC6A9;HTR2A;DCC
genitalia development	2	0.00528924	BAK1;TBX3	antigen processing and presentation of endogenous antigen	5	0.0255001	HLA-F;TAPBP;CD1A;ERAP1;CD1B	lysosomal lumen	3	0.00284732	FMOD;ARSA;CTSK	potassium ion transmembrane transporter activity	34	3.78895e-05	KCNE1;GRIK5;KCNQ2;KCNA1;KCNQ3;KCNB2;KCNH1;KCNK18;KCNT1;KCNK9;SLC24A1;KCNT2;SLC24A5;KCNG2;KCNN1;PKD2L1;GRIK3;KCNE2;HCN4;KCNK2;CCT8L2;KCNG4;MTMR6;KCNA10;SNAP25;KCNIP3;KCND3;KCNIP1;HCN1;SLC24A2;SLC9A8;ATP1A4;KCNU1;KCNH3	regulation of Ras protein signal transduction	46	0.00675778	EPS8;PSD4;STAMBP;ARFGEF2;CYTH3;ARHGDIB;MFN2;SQSTM1;FARP1;LPAR6;ITPKB;SYNPO2L;ARF6;CDC42SE2;FGD3;HEG1;ARAP3;F2RL3;MET;ARHGEF6;RIT2;ARHGEF18;FARP2;AKAP13;BCL6;CDC42SE1;CRK;KANK1;ECT2;EPS8L3;ARHGEF17;MCF2L;PLEKHG3;MCF2;ARHGAP44;FGD1;FBP1;MYO9B;VAV3;ARHGEF3;MADD;TNK1;ITGB1;CBL;ARFGAP1;ARHGAP42	transmitter-gated ion channel activity	10	0.000349065	GABRE;GRIN2B;GRIN2A;GRIK3;GABRB1;GLRA1;GABRA6;GABRA4;GRIK5;GRIA2
Glutathione	2	0.00528924	GSTA1;GSTM5	RNA polymerase activity	9	0.0298894	POLR3C;CD3EAP;POLR2J;POLR2I;MED21;POLR3A;POLR1C;POLR1E;POLR2L	secretory granule	8	0.00323845	CDC37L1;NAPRT;ACTN1;ARSA;PLA1A;LYZ;ZPBP2;CTSW	MHC class II protein complex	8	4.39586e-05	HLA-DQA2;HLA-DOB;HLA-DPA1;HLA-DPB1;HLA-DQA1;HLA-DMB;HLA-DOA;HLA-DRA	ATPase activity, coupled	65	0.00683727	ERCC2;TNNT1;FIGNL1;PCYOX1;ATP1B1;ABCD4;RFC3;CD320;HSP90AA1;RBBP4;ATP6V1B2;ABCD3;ABCB9;CCNH;ERCC3;DNHD1;DYNLL1;KIF20B;DDX1;DNAH8;XRCC3;MYL6;PBRM1;KIF5C;ATP1A1;DDX3X;DHX29;DYNC2H1;ATP6V0A2;ATP11B;GTF2H1;LMBRD1;ATRX;ATP9B;ATP11A;DSCC1;ATP10D;PEX1;ATP6V0E1;ATP11C;G3BP1;ATP9A;MSH6;DHX9;DDX23;FIGN;RFC4;SMARCA2;EIF4A1;KATNAL1;SNRNP200;DDX20;ATP6V1E1;KIFC3;TAPBP;DDX17;RAD17;ATP1B3;MSH4;ABCB10;ATP6V1C2;MC…	transmitter-gated channel activity	10	0.000349065	GABRE;GRIN2B;GRIN2A;GRIK3;GABRB1;GLRA1;GABRA6;GABRA4;GRIK5;GRIA2
glutathione metabolic process	2	0.00646721	GSTA1;GSTM5	retrograde vesicle-mediated transport, Golgi to ER	15	0.0303824	COPB1;BET1L;RER1;ARF5;TMED3;COPA;ERGIC3;KIF18A;TAPBP;PICK1;KIF5A;ATP9B;ARFGAP1;COPZ1;ARF3	response to mechanical stimulus	4	0.00347156	BAK1;BTG2;SOX9;ITGA2	G protein-coupled peptide receptor activity	31	5.49397e-05	MAS1;PROKR2;FPR1;CXCR1;SORCS1;CMKLR1;ADCYAP1R1;HCRTR2;NPFFR2;FPR3;GPR32;OPRM1;RXFP2;NMUR2;CCKBR;MC2R;RXFP1;BDKRB1;SORCS2;NPY1R;MC4R;XCR1;LHCGR;BDKRB2;NPY5R;CYSLTR2;CX3CR1;SORCS3;TACR3;GLP2R;GPR84	RNA polymerase II transcription factor binding	30	0.00774911	BBS7;TAF6L;BHLHE40;DDRGK1;PPARA;PPARG;GSK3B;ID1;JUN;MEF2A;SIN3A;ANKRD1;MYOCD;CREB1;HNRNPU;BBS10;LDB1;DHX9;HDAC4;YY1;MIER1;TBX6;RERE;DACT1;TCF7L2;MIER3;BHLHE41;NOP58;ATN1;TP53	sodium channel activity	8	0.000401904	ASIC2;SCN4A;GRIK3;ASIC5;GRIK5;NALCN;SCN5A;SCN11A
peroxidase activity	2	0.00646721	GSTA1;HBZ	RNA-dependent ATPase activity	9	0.0342366	DHX16;EIF4A1;SNRNP200;TDRD9;DDX5;DHX30;DDX17;DDX11;DDX54	thiolester hydrolase activity	2	0.00468705	NUDT7;ACOT2	ion transport	214	5.91432e-05	KCNE1;UNC79;CHRNB2;SLC22A2;COX8C;SCN8A;GRIK5;FGF2;STOML3;ATP10A;GRIN2B;SLC10A2;KCNQ2;CCL4L1;KCNA1;KCNQ3;HTR2A;GRM6;CCL3;SLC5A2;SCN11A;SLC8A3;CD84;SLC25A24;ANO5;RCVRN;CACNG3;SLC35A1;FTL;GABRR2;VAMP3;BEST2;KCNB2;DPP10;GRIN2A;KCNH1;SCN5A;FGF23;KCNK18;PRKCB;PMPCA;TRPC4;ATP2B2;ADCYAP1R1;COX7B2;OR56A5;GLRA1;LCN1;CACNG2;PHB;GABRB1;VIP;SYT11;KCNT1;FFAR1;SCN10A;FAM155A;SLC4A8;NALCN;GABRE;ANO2;TRDN;OPRM1;K…	Ras protein signal transduction	78	0.00788986	EPS8;GDI1;RALGDS;PSD4;STAMBP;GNB1;ARFGEF2;CYTH3;ARHGDIB;MFN2;PRKD1;SQSTM1;FARP1;LPAR6;RAB2A;RAB36;RAPGEF2;ITPKB;ARHGAP1;SYNPO2L;RIT1;ARF6;ARHGAP4;RAB3B;WASF2;RHOJ;RAP1A;CDC42SE2;JUN;FGD3;HEG1;RAP1B;RAB1A;ARAP3;F2RL3;MET;ARHGEF6;RIT2;RAB34;ARHGEF18;FARP2;AKAP13;BCL6;ARHGAP29;WAS;CDC42SE1;GNA13;G3BP1;CRK;CDKN1A;KANK1;KPNB1;ECT2;EPS8L3;RAB30;ARHGEF17;RTKN;USP50;MCF2L;RAB39A;PLEKHG3;MCF2;ARHGAP44;FGD…	regulation of postsynaptic membrane potential	16	0.000424543	GABRE;GRIN2B;GRIN2A;KCNA1;WNT7A;NPAS4;OPRM1;GRM5;GABRB1;GLRA1;P2RX3;GABRA6;FGF14;GABRA4;GRIK5;IGSF9B
positive regulation of endopeptidase activity	3	0.00670884	JAK2;BAK1;SERPINB3	respiratory chain complex I	10	0.0345321	NDUFS6;NDUFA4;NDUFA6;NDUFV2;NDUFB9;NDUFS7;NDUFS8;NDUFB6;NDUFAB1;NDUFV1	cellular component morphogenesis	9	0.00469657	AKAP13;CFDP1;ACTN1;SS18;ARX;ARHGAP33;CUX2;NEDD9;ZPBP2	cellular calcium ion homeostasis	72	5.99943e-05	FGF2;GRIN2B;HTR2A;FPR1;CCL3;GRINA;SLC8A3;CXCR1;GRIN2A;ADRA1B;PRKCB;TRPC4;ATP2B2;CMKLR1;ADCYAP1R1;HCRTR2;FPR3;CSRP3;SYPL2;GPR32;PDE6B;FAM155A;HMGB1;TRDN;CCL7;SLC24A1;RYR1;NMUR2;ANK2;CCL8;ADCY8;CCL11;PLCG2;CCKBR;TRPC7;TRPC3;SLC24A5;BDKRB1;ATP13A5;CACNA1A;XCR1;TMEM64;RYR3;TRPM2;GNA15;TRPC6;DHRS7C;GPR4;BDKRB2;CCL1;METTL21C;CCL13;HSP90B1;UBASH3B;CNR1;CX3CR1;CEMIP;KNG1;PLCZ1;FATE1;RYR2;CALR;JPH3;PVALB;…	positive regulation of potassium ion import	4	0.00868786	WNK4;ATP1B1;WNK3;ATP1B3	intrinsic component of synaptic membrane	18	0.000476586	CADM3;GRIN2A;SLC1A6;KCNA1;ADCY8;NTRK3;HTR5A;OPRM1;CACNG2;GLRA1;P2RX3;SORCS3;CACNG3;GABRA4;GRIK5;SLC6A9;HTR2A;DCC
blood coagulation	4	0.00691966	JAK2;ACTN1;ANXA8;CSRP1	DNA polymerase activity	7	0.0362451	POLE4;POLG2;CHRAC1;POLI;PTGES3;POLD4;POLD1	heat shock protein binding	3	0.00489628	BAK1;CDC37L1;UNC45A	antigen processing and presentation via MHC class Ib	7	6.37917e-05	AP3D1;CD1A;HLA-F;CD1C;CD1D;CD1B;CD1E	negative regulation of JAK-STAT cascade	7	0.00999912	ADIPOR1;VHL;BCL3;PPP2R1A;INPP5F;CAV1;GGNBP2	positive regulation of calcium-mediated signaling	8	0.000477221	NRG1;CDH13;CIB1;P2RX3;SYK;TREM2;CCL4L1;C10orf71
coagulation	4	0.00722228	JAK2;ACTN1;ANXA8;CSRP1	regulation of transcription of nucleolar large rRNA by RNA polymerase I	4	0.0383834	NCL;PWP1;H2AFY2;DDX11	proteoglycan binding	2	0.00496156	CTSK;ITGA2	calcium ion transmembrane transport	52	7.48579e-05	FGF2;GRIN2B;HTR2A;CCL3;SLC8A3;CACNG3;GRIN2A;PMPCA;TRPC4;ATP2B2;CACNG2;PHB;FAM155A;NALCN;TRDN;OPRM1;SLC24A1;RYR1;ANK2;CACNA2D4;PLCG2;TRPC7;TRPC3;SLC24A5;BDKRB1;CACNA1A;PKD2L1;RYR3;TRPM2;FGF14;GRIN3B;KCNE2;TRPC6;DHRS7C;STAC;METTL21C;CACNA1E;UBASH3B;CACNA1B;CACNA1I;CEMIP;RYR2;JPH3;CACNA1H;WNT3A;PDE2A;MICU3;SLC24A2;TGFB1;CALM1;CATSPER1;MCUR1	regulation of carbohydrate metabolic process by regulation of transcription from RNA polymerase II promoter	5	0.0108017	PPARA;FOXO1;GCG;SUPT20H;MLXIP	voltage-gated cation channel activity	16	0.00063307	GRIN2B;KCNB2;GRIN2A;KCNA1;KCNT2;OPRM1;KCNK18;KCNQ3;CACNG2;KCNA4;KCNT1;KCNV1;CACNG3;KCNQ2;CACNA1A;CATSPER1
Hepatocellular carcinoma	3	0.00728961	BAK1;GSTA1;GSTM5	regulation of transcription by RNA polymerase I	7	0.0423863	NCL;HEATR1;PWP1;H2AFY2;DDX11;POLR2L;UBTF	Lysosome	3	0.00604589	ARSA;CTSK;CTSW	response to external biotic stimulus	129	8.23333e-05	CLEC4D;REG1B;APOBEC1;NLRP9;NLRC4;SCRIB;LYZL2;S100A12;REG3G;SLC10A2;ZNF175;PRG2;CCL4L1;AICDA;IRF8;DMBT1;CCL3;ADIPOQ;FGA;TLR2;MS4A1;PGLYRP3;LCE3A;MICB;NLRP10;LYZL6;LRAT;DEFA5;CARD16;LPO;LYZL1;FCGR2B;DEFB125;SYT11;DEFB123;HMGB1;KRT6A;AIM2;DEFA1;BMP2;TRDN;OPRM1;DEFA4;RNASE2;REN;CCL8;CCL11;PLCG2;DCN;S100A9;LILRB1;BDKRB1;TMEM229B;PNLIPRP2;S100A8;STOX2;LSM14A;TRIB1;FCN2;TRIM15;DEFB127;HRG;RNASE3;CCL2;IG…	cGMP-PKG signaling pathway	33	0.012825	VDAC3;ATP1B1;PLCB1;CACNA1D;VDAC2;ADCY3;ITPR1;PPP3CC;KCNMB3;ATP1A1;ITPR2;VDAC1;GNA13;MAPK3;BAD;PRKCE;MEF2A;PPIF;CREB1;PLCB4;CALML5;CNGB1;GNA11;PRKG2;ADRA2C;AKT2;ATP1B3;CREB5;ATP2A2;AKT3;INSR;PDE3A;CALML4	Nilotinib	4	0.000676027	CYP2C8;CYP2B6;CYP2C9;UGT1A1
hemostasis	4	0.00729929	JAK2;ACTN1;ANXA8;CSRP1	inactivation of MAPK activity	6	0.0463174	DUSP14;GPS1;DUSP5;DUSP18;DUSP16;DUSP4	regulation of dendritic spine morphogenesis	2	0.00644203	ARHGAP33;CUX2	intrinsic component of synaptic membrane	34	8.2574e-05	CHRNB2;GRIK5;KCNA1;HTR2A;SLC8A3;DCC;CACNG3;PTPRO;GRIN2A;KCNH1;GLRA1;CACNG2;CADM3;SYT11;SCN10A;OPRM1;CHRM3;ADCY8;CHRNA4;GRID1;SLC6A1;LRRC4B;NTRK3;SLC1A6;CNTN1;HTR5A;SLC6A3;GABRA3;CNR1;SORCS3;KCND3;P2RX3;EFNB3;CNTN5	RNA polymerase II distal enhancer sequence-specific DNA binding	22	0.013626	SMARCD2;NFYB;GZF1;BHLHE40;H3F3A;NONO;RBBP4;CCAR1;HOXC6;BACH2;JUN;MBD3;CREB1;CLOCK;CDX2;ARID3B;YY1;TBX6;H2AFZ;BHLHE41;NR1D2;TP53	integral component of postsynaptic membrane	14	0.000746361	GRIN2A;KCNA1;NTRK3;HTR5A;OPRM1;CACNG2;GLRA1;SORCS3;CACNG3;GABRA4;GRIK5;SLC6A9;HTR2A;DCC
regulation of neurotransmitter receptor activity	2	0.00748752	PATE1;PATE4	positive regulation of ATPase activity	10	0.0488361	DNAJA2;HNRNPU;AHSA1;DNAJB11;DNAJB6;PFN1;DYNLL1;NCAPH;RYR2;SUMO1	brown fat cell differentiation	2	0.00644203	NUDT7;UCP1	response to biotic stimulus	132	9.20618e-05	CLEC4D;REG1B;APOBEC1;NLRP9;NLRC4;SCRIB;LYZL2;S100A12;REG3G;SLC10A2;ZNF175;PRG2;CCL4L1;AICDA;IRF8;DMBT1;CCL3;ADIPOQ;FGA;TLR2;MS4A1;PGLYRP3;LCE3A;MICB;NLRP10;LYZL6;LRAT;DEFA5;CARD16;LPO;LYZL1;FCGR2B;DEFB125;SYT11;DEFB123;HMGB1;KRT6A;AIM2;DEFA1;BMP2;TRDN;OPRM1;DEFA4;RNASE2;REN;CCL8;CCL11;PLCG2;DCN;S100A9;LILRB1;BDKRB1;TMEM229B;PNLIPRP2;S100A8;STOX2;LSM14A;TRIB1;FCN2;TRIM15;DEFB127;HRG;CRTAM;RNASE3;C…	regulation of potassium ion import	4	0.0155047	WNK4;ATP1B1;WNK3;ATP1B3	cation transport	72	0.00100283	ALG10B;CATSPER2;HEPH;TRPC5;SLC5A2;KCNK9;RYR3;GRIN2B;SLC6A2;FTHL17;DPP6;PIEZO2;OTOP1;KCNB2;GRIN2A;ADCYAP1R1;KCNA1;ASIC2;GRM6;SCN4A;DPP10;KCNT2;PRKCB;OPRM1;TMEM38A;ASIC5;KCNK18;KCNQ3;CCL2;BHLHA15;CNGA2;SLC2A9;CACNG2;COX7B2;METTL21C;KCNA4;P2RX3;KCNIP4;JPH3;LILRB1;KCNT1;CNGB3;UBASH3B;KCNV1;CAPN3;SYK;ATP2B2;FGF14;CACNG3;SLC22A14;VIP;SLC17A6;PM20D1;COX8C;NMUR2;NALCN;SCN5A;TMEM63C;SCN11A;SLC6A9;SLC5A7;O…
oxidoreductase activity, acting on peroxide as acceptor	2	0.00748752	GSTA1;HBZ	RNA binding	282	0	PEBP1;CCAR1;SRP14;RBM15B;SRSF11;MIF4GD;CCNT1;DHFR;SLIRP;DHX16;DDX50;RPL21;HNRNPA0;EIF5;RPL10;BOP1;HSPA9;EIF2S2;ARF1;EIF3B;ZNF598;RPL37A;HNRNPU;ATXN2L;CNOT6;U2AF2;RANBP2;EIF4A1;SRP9;DCN;RPS7;SAFB;KPNB1;CAPRIN1;NCL;EIF4G2;HNRNPUL1;HEATR1;RBM5;MKRN1;EIF2AK2;EZH2;DUSP14;NUDT16L1;PRRC2A;SRSF3;RPL30;SMNDC1;RPN1;RPS15A;RPS3A;GTF3A;HNRNPDL;TRMT11;MAGOH;DDX53;DUSP11;EPPK1;MRPL28;UPF2;ANGEL2;NOL7;HNRNPF;HS…	platelet degranulation	3	0.00660432	CDC37L1;ACTN1;CTSW	integral component of synaptic membrane	32	9.9142e-05	CHRNB2;GRIK5;KCNA1;HTR2A;SLC8A3;DCC;CACNG3;PTPRO;GRIN2A;KCNH1;GLRA1;CACNG2;CADM3;SYT11;SCN10A;OPRM1;CHRM3;ADCY8;CHRNA4;GRID1;SLC6A1;LRRC4B;NTRK3;SLC1A6;HTR5A;SLC6A3;GABRA3;CNR1;SORCS3;KCND3;P2RX3;EFNB3	ATPase activity	76	0.0165756	KIF27;ERCC2;TNNT1;FIGNL1;PCYOX1;ATP1B1;ABCD4;RFC3;CD320;HSP90AA1;RBBP4;ATP6V1B2;ABCD3;ABCB9;CCNH;ERCC3;DNHD1;DYNLL1;KIF20B;DDX1;DNAH8;XRCC3;MYL6;PBRM1;KIF5C;KIF2A;ATP1A1;KIF24;DDX3X;DHX29;DYNC2H1;MDN1;VWA8;ATP6V0A2;ATP11B;GTF2H1;LMBRD1;ATRX;ATP9B;ATP11A;DSCC1;ATP10D;PEX1;ATP6V0E1;ATP11C;G3BP1;HLTF;ATP9A;MSH6;DHX9;DDX23;FIGN;RFC4;SMARCA2;KIF3C;EIF4A1;KATNAL1;SNRNP200;DDX20;ATP6V1E1;MLH1;ACTC1;KIFC…	intrinsic component of postsynaptic membrane	14	0.00113013	GRIN2A;KCNA1;NTRK3;HTR5A;OPRM1;CACNG2;GLRA1;SORCS3;CACNG3;GABRA4;GRIK5;SLC6A9;HTR2A;DCC
transferase activity, transferring alkyl or aryl (other than methyl) groups	2	0.00775325	GSTA1;GSTM5	ribonucleoprotein complex	165	1.11022e-16	SRP14;SLIRP;IK;DHX16;RPL21;HNRNPA0;RPL10;BOP1;EIF3B;SF3B3;RPLP2;RPL37A;DRG1;RPL22L1;HNRNPU;ATXN2L;U2AF2;SRP9;RPS7;KPNB1;CAPRIN1;NCL;HEATR1;RBM5;EIF2AK2;TMA16;RPL30;SMNDC1;MRPS25;RPS15A;RPS3A;HNRNPDL;MAGOH;MRPL28;AURKAIP1;UPF2;HNRNPF;TXNL4A;DICER1;HNRNPAB;MRPL37;RBM3;SF1;BTRC;PRPF6;PNRC2;RPL35;RPS8;RPL8;RPLP1;MPV17L2;SNRNP200;NSUN2;RPS14;TBL3;ZC3H14;TUBB;YBX1;EEF2;LSM14A;TDRD9;IMP4;RPL6;RPL37;HNRN…	digestion	3	0.00734433	KCNN4;ARX;SOX9	intrinsic component of presynaptic membrane	21	0.000102939	CHRNB2;GRIK5;KCNA1;HTR2A;KCNH1;GLRA1;CADM3;SYT11;SCN10A;OPRM1;CHRM3;ADCY8;CHRNA4;SLC6A1;SLC1A6;CNTN1;SLC6A3;CNR1;P2RX3;EFNB3;CNTN5	RNA polymerase II transcription repressor complex	3	0.0206682	ETV3;DR1;DDX20	ligand-gated anion channel activity	5	0.001226	GABRE;GABRB1;GLRA1;GABRA6;GABRA4
Glutathione metabolism	2	0.00775325	GSTA1;GSTM5	catalytic complex	221	9.48686e-13	HINT1;RNF31;RBM15B;PDCD6;CCNT1;MED31;FBXW5;CCNH;UQCRFS1;SF3B3;PCGF5;PSMF1;HNRNPU;DYNLRB2;SDHC;SYVN1;PSMD8;PHC3;EZH2;BRD9;PSMD6;BRMS1L;RPN1;RCHY1;POLR3C;ARIH2;CYC1;POLE4;MAGOH;CKS2;KMT2B;CCNI;SPTLC2;ACTR5;HNRNPF;HTRA2;PRDM4;NDUFS6;DICER1;TAF13;BTRC;PRPF6;PSME2;PHF12;PSMD9;SAP130;ENO3;SNRNP200;UBE2E1;ERCC2;PRKAB1;FBXO45;RNF144B;ASB2;RBCK1;P4HB;SMARCD2;NDUFA4;PSMA7;UQCRH;NDUFA6;KDM5B;JADE1;MEN1;POLR…	eye photoreceptor cell differentiation	2	0.00741505	RPGRIP1;SOX9	sodium ion transmembrane transporter activity	31	0.000123336	SCN8A;GRIK5;SLC6A16;SLC10A2;SLC5A2;SCN11A;SLC8A3;SCN5A;SCN10A;SLC4A8;NALCN;SLC24A1;SLC6A1;SLC24A5;PKD2L1;TRPM2;SLC1A6;GRIK3;HCN4;SLC6A7;SLC6A3;ABCB11;SCN4A;SLC6A12;SLC13A5;SCN9A;HCN1;SLC18A2;SLC24A2;SLC9A8;ATP1A4	RNA polymerase II C-terminal domain binding	3	0.0206682	RTF1;HNRNPU;BRD4	GABA-A receptor activity	5	0.001226	GABRE;GABRB1;GABRA6;GABRA4;GABRP
appendage development	3	0.00840837	BAK1;HOXA10;TBX3	cellular macromolecule catabolic process	189	1.65201e-12	RNF139;CDC34;BAG5;SLIRP;RPL21;HNRNPA0;FBXW5;RPL10;RPLP2;GBA;RPL37A;TIRAP;BBS7;YWHAB;CTSV;PSMF1;HNRNPU;CNOT6;USP50;GSK3B;TRIM3;RPS7;KPNB1;VPS37A;BIRC6;SYVN1;PSMD8;PCYOX1;PSMD6;RPL30;RPS15A;RPS3A;RCHY1;ARIH2;MAGOH;RNF4;TRIB1;JKAMP;UPF2;ST20;ANGEL2;HTRA2;DICER1;DNAJB9;BTRC;PSME2;PNRC2;RPL35;RPS8;PSMD9;GEN1;RPL8;RPLP1;UBE2E1;RPS14;FBXO45;ZC3H14;RNF144B;YBX1;RBCK1;YWHAZ;PSMA7;RPL6;TMEM67;RPL37;FOXRED2…	vacuole	7	0.00748625	GLB1L;NAPRT;FMOD;ARSA;CTSK;LYZ;CTSW	potassium channel complex	23	0.00013929	KCNE1;GRIK5;KCNQ2;KCNA1;KCNQ3;KCNB2;DPP10;KCNH1;KCNG2;KCNN1;DPP6;GRIK3;KCNE2;HCN4;KCNK2;KCNG4;KCNA10;SNAP25;KCNIP3;KCND3;KCNIP1;HCN1;CALM1	canonical Wnt signaling pathway	50	0.0223551	JADE1;EDA;XIAP;LRP5L;TLE1;FZD8;SOX9;SOX4;FOXO3;BCL9;USP47;ZNF703;DDIT3;MLLT3;CAPRIN2;AMER1;APC2;KREMEN2;LRP6;AMER2;TBL1XR1;FZD4;SHISA6;GSK3B;BICC1;CCNY;FRAT1;DDX3X;AXIN2;ZNRF3;SNAI2;TRPM4;FOXO1;CTDNEP1;USP34;G3BP1;KREMEN1;FGF8;LRP5;NR4A2;KANK1;JRK;FZD3;TLE4;DACT1;BTRC;TCF7L2;ASPM;CAV1;PYGO2	potassium channel activity	14	0.00132427	KCNK9;KCNB2;KCNA1;GRIK3;KCNT2;TMEM38A;KCNK18;KCNQ3;KCNA4;KCNIP4;KCNT1;KCNV1;GRIK5;KCNQ2
limb development	3	0.00840837	BAK1;HOXA10;TBX3	translational initiation	54	4.39071e-12	MIF4GD;RPL21;PAIP2B;EIF5;RPL10;EIF2S2;EIF3B;RPLP2;RPL37A;EIF4A1;RPS7;EIF4G2;EIF2AK2;RPL30;RPS15A;RPS3A;RPL35;RPS8;RPL8;RPLP1;RPS14;EIF2B1;RPL6;RPL37;EIF2B4;RPL31;RPS11;RPS3;EIF1AX;RPS15;COPS5;EIF3L;EIF4B;RPL13;RPSA;CDC123;EIF2A;EIF2B2;RPLP0;RPS2;EIF3E;RPS12;EIF3A;YTHDF2;NPM1;RPL22;IMPACT;RPL18A;EIF3J;RPL10A;EIF2S3;RPL4;RPS16;EIF1	phospholipid binding	5	0.00784568	PCTP;ANXA8L1;F3;ARHGAP33;UCP1	calcium ion homeostasis	72	0.000162735	FGF2;GRIN2B;HTR2A;FPR1;CCL3;GRINA;SLC8A3;CXCR1;GRIN2A;ADRA1B;PRKCB;TRPC4;ATP2B2;CMKLR1;ADCYAP1R1;HCRTR2;FPR3;CSRP3;SYPL2;GPR32;PDE6B;FAM155A;HMGB1;TRDN;CCL7;SLC24A1;RYR1;NMUR2;ANK2;CCL8;ADCY8;CCL11;PLCG2;CCKBR;TRPC7;TRPC3;SLC24A5;BDKRB1;ATP13A5;CACNA1A;XCR1;TMEM64;RYR3;TRPM2;GNA15;TRPC6;DHRS7C;GPR4;BDKRB2;CCL1;METTL21C;CCL13;HSP90B1;UBASH3B;CNR1;CX3CR1;CEMIP;KNG1;PLCZ1;FATE1;RYR2;CALR;JPH3;PVALB;…	regulation of ATP metabolic process	17	0.0231936	P2RX7;PPARA;ZBTB20;SLC25A12;EIF6;PRKAG2;PPIF;PGAM1;HDAC4;PFKFB1;UQCC2;FBP1;PID1;ENO1;DNAJC30;INSR;ECD	GABA-gated chloride ion channel activity	4	0.00148292	GABRE;GABRB1;GABRA6;GABRA4
platelet aggregation	2	0.00857567	ACTN1;CSRP1	mRNA metabolic process	139	2.07014e-11	CCAR1;RBM15B;SRSF11;CCNT1;IK;DHX16;RPL21;HNRNPA0;RPL10;CCNH;SF3B3;RPLP2;RPL37A;TIRAP;YWHAB;HNRNPU;CNOT6;U2AF2;RPS7;SAFB;HNRNPUL1;RBM5;SRSF3;RPL30;SMNDC1;RPS15A;RPS3A;MAGOH;AURKAIP1;UPF2;ANGEL2;HNRNPF;RBM39;TXNL4A;APOBEC4;PTBP1;RBM3;SF1;PRPF6;PAPOLG;PNRC2;RPL35;RPS8;NUDT21;SCAF11;RPL8;RPLP1;SNRNP200;RPS14;ERCC2;ZC3H14;YBX1;YWHAZ;IWS1;RPL6;RPL37;POLR2J;HNRNPC;RPL31;RPS11;THOC3;TRUB1;SNRPG;PNN;SAMD4…	Apoptosis	3	0.00797038	BAK1;CTSK;CTSW	synaptic membrane	69	0.000165697	CHRNB2;GRIK5;CTNNA2;SCRIB;GRIN2B;KCNA1;HTR2A;GRM6;SLC8A3;DCC;CACNG3;PTPRO;GABRR2;GRIN2A;KCNH1;ATP2B2;DLGAP3;GLRA1;CACNG2;PHB;GABRB1;CADM3;SYT11;TMEM108;SCN10A;GABRE;TIAM1;CDH8;OPRM1;CHRM3;ANK2;GABRB3;GABRP;ADCY8;GLRA3;LIN7C;CHRNA4;GRID1;SLC6A1;DGKI;GABBR2;LRRC4B;NTRK3;SLC1A6;GRIK3;GABRQ;GRIN3B;TENM2;CNTN1;FBXO45;ARF1;HTR5A;SLC6A3;GABRA3;SNCAIP;ZDHHC17;CNR1;SNAP25;SORCS3;DAGLB;KCND3;HSPA8;STXBP1;P…	AMP metabolic process	5	0.0237798	ADK;APRT;AK4;AK3;ADSS	GABA receptor complex	5	0.00157494	GABRE;GABRB1;GABRA6;GABRA4;GABRP
intercellular bridge	2	0.00857567	GSTM5;FASTKD2	cell cycle	261	1.48512e-10	EPS8;PEBP1;CCAR1;SCRIB;CDC34;CCNT1;DHFR;HJURP;IK;ATRIP;FBXW5;CCNH;BOP1;ARF1;STK35;MAPK1;PTK6;TLK1;HNRNPU;CNOT6;KPNB1;EIF4G2;BIRC6;ORC1;PHC3;EZH2;CHAF1A;RPS15A;TTN;POLE4;OSGIN2;CKS2;AZI2;TTK;MCM6;RNF4;RFC5;AURKAIP1;NAE1;CCP110;ANGEL2;SPC25;CCNI;RCBTB1;HTRA2;JTB;TTC19;TXNL4A;HRAS;PIDD1;BTRC;PSME2;PLAGL1;TIPRL;BUB1;GEN1;C6orf89;UBE2E1;NSUN2;ERCC2;PRKAB1;ZNF207;NTMT1;TUBB;STAMBP;NIPBL;TDRD9;MEPCE;CUZ…	endocrine pancreas development	2	0.00809831	BAK1;SOX9	sodium channel activity	13	0.000169593	SCN8A;GRIK5;SCN11A;SCN5A;SCN10A;NALCN;PKD2L1;TRPM2;GRIK3;HCN4;SCN4A;SCN9A;HCN1	regulation of transcription initiation from RNA polymerase II promoter	8	0.0243101	DR1;PAXIP1;THRA;SUB1;CREB1;CTNNBIP1;CAND1;TP53	G protein-coupled neurotransmitter receptor activity	7	0.00180483	HTR5A;OPRM1;OR6T1;HTR1E;HRH4;HTR2A;HRH2
positive regulation of peptidase activity	3	0.00893627	JAK2;BAK1;SERPINB3	protein localization to endoplasmic reticulum	41	2.02774e-10	SRP14;RPL21;RPL10;RPLP2;RPL37A;RER1;SRP9;RPS7;RPL30;RPS15A;PMM2;RPS3A;RPL35;RPS8;RPL8;RPLP1;RPS14;RPL6;RPL37;RPL31;RPS11;ZFAND2B;RPS3;RPS15;OS9;DDRGK1;RPL13;RPSA;GRIK5;RPLP0;RPS2;TAPT1;RYR2;RPS12;RPL22;SPCS2;RPL18A;ASNA1;RPL10A;RPL4;RPS16	secretory vesicle	8	0.00841805	CDC37L1;NAPRT;ACTN1;ARSA;PLA1A;LYZ;ZPBP2;CTSW	G protein-coupled receptor signaling pathway, coupled to cyclic nucleotide second messenger	45	0.000171845	APLP1;GNG2;OR10H2;MARCO;HTR2A;GRM6;FPR1;HRH2;ADRA1B;OR6T1;OR10H5;OR56A5;VIP;GPHB5;OPRM1;RXFP2;CHRM3;HTR1E;ADCY8;GPR26;MC2R;RXFP1;NPY1R;MC4R;PSAPL1;XCR1;LHCGR;CCL2;GNA15;GRIK3;HTR5A;ADM2;OR10J5;GNAL;CNR1;HRH1;OR10H3;RIC8A;HTR4;OR10H1;GLP2R;PDE2A;PTGIR;CASR;PRMT5	DNA-dependent ATPase activity	19	0.024739	ERCC2;RFC3;RBBP4;CCNH;ERCC3;XRCC3;PBRM1;DDX3X;GTF2H1;ATRX;DSCC1;G3BP1;MSH6;DHX9;RFC4;SMARCA2;RAD17;MSH4;MCM4	ion transmembrane transport	70	0.00187489	ALG10B;CATSPER2;TRPC5;KCNK9;RYR3;GABRE;GRIN2B;DPP6;PIEZO2;OTOP1;KCNB2;GRIN2A;SLC26A5;SLC1A6;KCNA1;ASIC2;SCN4A;GRIK3;DPP10;KCNT2;OPRM1;LRRC8E;TMEM38A;ASIC5;KCNK18;GRM5;KCNQ3;BHLHA15;CNGA2;GABRB1;SLC2A9;CLCN6;CACNG2;COX7B2;METTL21C;GLRA1;KCNA4;P2RX3;KCNIP4;JPH3;KCNT1;CNGB3;UBASH3B;KCNV1;GABRA6;CAPN3;ATP2B2;FGF14;CACNG3;GABRA4;CLCN7;SLC17A6;PM20D1;GRIK5;COX8C;NMUR2;GRIA2;GABRP;NALCN;SCN5A;TMEM63C;SC…
chemokine receptor binding	2	0.00914477	S100A14;DEFB4B	establishment of protein localization to endoplasmic reticulum	36	2.11935e-10	SRP14;RPL21;RPL10;RPLP2;RPL37A;SRP9;RPS7;RPL30;RPS15A;PMM2;RPS3A;RPL35;RPS8;RPL8;RPLP1;RPS14;RPL6;RPL37;RPL31;RPS11;ZFAND2B;RPS3;RPS15;RPL13;RPSA;RPLP0;RPS2;RYR2;RPS12;RPL22;SPCS2;RPL18A;ASNA1;RPL10A;RPL4;RPS16	neural precursor cell proliferation	3	0.00913987	BTG2;RPGRIP1;ARX	integral component of presynaptic membrane	19	0.000179471	CHRNB2;GRIK5;KCNA1;HTR2A;KCNH1;GLRA1;CADM3;SYT11;SCN10A;OPRM1;CHRM3;ADCY8;CHRNA4;SLC6A1;SLC1A6;SLC6A3;CNR1;P2RX3;EFNB3	regulation of neurotransmitter receptor localization to postsynaptic specialization membrane	4	0.0249201	GPC4;RAP1A;GPC6;DAG1	G protein-coupled peptide receptor activity	15	0.00190801	SORCS1;PROKR2;GPR32;LHCGR;ADCYAP1R1;OPRM1;CXCR6;NPBWR2;CMKLR1;SORCS3;CCR6;NMUR2;MAS1;NPY5R;SSTR3
regulation of cell proliferation	9	0.00978831	IFT74;JAK2;BAK1;SERPINB7;ARX;TBX3;SERPINB3;HIST1H2AE;TRPC5	macromolecule catabolic process	210	2.54737e-10	RNF139;CDC34;BAG5;SLIRP;RPL21;HNRNPA0;FBXW5;RPL10;SF3B3;RPLP2;GBA;RPL37A;TIRAP;BBS7;YWHAB;CTSV;PSMF1;HNRNPU;FGF2;CNOT6;USP50;GSK3B;TRIM3;DCN;RPS7;KPNB1;VPS37A;BIRC6;SYVN1;PSMD8;PCYOX1;PSMD6;RPL30;LYPLA1;RPS15A;RPS3A;RCHY1;ARIH2;MAGOH;RNF4;TRIB1;JKAMP;UPF2;ST20;ANGEL2;HTRA2;DICER1;DNAJB9;BTRC;PSME2;PNRC2;RPL35;RPS8;PSMD9;GEN1;RPL8;RPLP1;UBE2E1;RPS14;FBXO45;ZC3H14;RNF144B;YBX1;RBCK1;YWHAZ;PSMA7;RPL…	stem cell population maintenance	3	0.00913987	SS18;FANCC;SOX9	extracellular ligand-gated ion channel activity	19	0.000179471	CHRNB2;GRIK5;GRIN2B;GABRR2;GRIN2A;GLRA1;GABRB1;GABRE;GABRB3;GABRP;GLRA3;CHRNA4;GRID1;GRIK3;GABRQ;GRIN3B;GABRA3;HTR3E;P2RX3	coreceptor activity involved in Wnt signaling pathway	4	0.0249201	LRP6;GPC4;GPC6;LRP5	synaptic membrane	33	0.00191924	GABRE;GRIN2B;SLC6A2;CADM3;GRIN2A;SLC1A6;KCNA1;ADCY8;GRM6;GRIK3;NTRK3;HTR5A;OPRM1;GRM5;GABRB1;GAD2;CACNG2;GLRA1;P2RX3;SORCS3;GABRA6;ATP2B2;CACNG3;GABRA4;GRIK5;GRIA2;GABRP;CDH8;SLC6A9;ANK2;HTR2A;DCC;IGSF9B
myeloid cell development	2	0.0109503	TRIM58;HBZ	protein targeting to ER	35	2.8918e-10	SRP14;RPL21;RPL10;RPLP2;RPL37A;SRP9;RPS7;RPL30;RPS15A;PMM2;RPS3A;RPL35;RPS8;RPL8;RPLP1;RPS14;RPL6;RPL37;RPL31;RPS11;ZFAND2B;RPS3;RPS15;RPL13;RPSA;RPLP0;RPS2;RPS12;RPL22;SPCS2;RPL18A;ASNA1;RPL10A;RPL4;RPS16	protein kinase A binding	2	0.00917422	AKAP13;SOX9	voltage-gated potassium channel complex	21	0.000246717	KCNE1;KCNQ2;KCNA1;KCNQ3;KCNB2;DPP10;KCNH1;KCNG2;KCNN1;DPP6;KCNE2;HCN4;KCNK2;KCNG4;KCNA10;SNAP25;KCNIP3;KCND3;KCNIP1;HCN1;CALM1	positive regulation of ATPase activity	13	0.0277536	PFN1;ATP1B1;DNAJC24;DNAJA2;DYNLL1;UHRF1;DNAJB1;DNAJB11;HNRNPU;DHX9;ATP1B3;DNAJC2;TPM1	postsynaptic specialization membrane	12	0.00201263	GRIN2B;GRIN2A;HTR5A;GRM5;CACNG2;GLRA1;SORCS3;ATP2B2;CACNG3;GABRA4;GRIK5;DCC
His-Purkinje system development	1	0.0117627	TBX3	ribosome	56	6.67243e-10	RPL21;RPL10;RPLP2;RPL37A;RPL22L1;RPS7;EIF2AK2;TMA16;RPL30;MRPS25;RPS15A;RPS3A;MRPL28;AURKAIP1;MRPL37;RBM3;SF1;RPL35;RPS8;RPL8;RPLP1;MPV17L2;RPS14;EEF2;RPL6;RPL37;RPL31;MRPL9;RPS11;MRPL51;MTG1;RPS3;ZC3H15;MRPL24;RPS15;MRPL1;APEX1;RPL13;MRPL38;RPSA;MRPS26;EIF2A;MRPS21;RPLP0;MRPS10;RPS2;RPS12;MTG2;MRPL52;MRPL46;RPL22;NDUFAB1;RPL18A;RPL10A;RPL4;RPS16	eye morphogenesis	3	0.0093147	BAK1;RPGRIP1;SOX9	intracellular ligand-gated ion channel activity	11	0.000327051	RYR1;CNGA2;RYR3;TRPM2;HCN4;KCNA10;CNGA4;CNGB3;RYR2;JPH3;HCN1	Wnt-activated receptor activity	6	0.0280058	LRP5L;FZD8;LRP6;FZD4;LRP5;FZD3	regulation of ion transport	45	0.00223585	ALG10B;CATSPER2;FGF23;GABRE;DPP6;KCNB2;ADCYAP1R1;SLC26A5;KCNA1;ASIC2;GRM6;SCN4A;DPP10;OPRM1;GRM5;KCNQ3;CCL2;CACNG2;METTL21C;KCNA4;P2RX3;KCNIP4;JPH3;LILRB1;UBASH3B;KCNV1;CAPN3;SYK;FGF14;CACNG3;VIP;PM20D1;NALCN;SCN5A;SCN11A;OR56A5;CCL4L1;ANK2;KCNQ2;NPY5R;RCVRN;SYT10;CACNA1A;HTR2A;CATSPER1
cardiac pacemaker cell differentiation	1	0.0117627	TBX3	translation	113	7.02974e-10	RNF139;MIF4GD;DHFR;RPL21;PAIP2B;EIF5;RPL10;EIF2S2;EIF3B;RPLP2;ZNF598;RPL37A;RPL22L1;MAPK1;CNOT6;EIF4A1;SRP9;RPS7;CAPRIN1;NCL;EIF4G2;EIF2AK2;RPL30;MRPS25;RPS15A;RPS3A;MAGOH;MRPL28;AURKAIP1;MRPL37;RBM3;AIMP1;RPL35;RPS8;RPL8;RPLP1;MPV17L2;RPS14;EIF2B1;EEF2;LSM14A;IARS;RPL6;RPL37;EIF2B4;SHMT1;RPL31;MRPL9;EEF1D;RPS11;MRPL51;MTG1;SAMD4A;RPS3;ZC3H15;EIF1AX;MRPL24;RPS15;TRMT10C;COPS5;KHSRP;EIF3L;ATXN2;MR…	regulation of anatomical structure morphogenesis	8	0.0094035	AKAP13;CFDP1;STIM1;SOX9;F3;ARHGAP33;CUX2;NEDD9	voltage-gated sodium channel activity	8	0.000352536	SCN8A;SCN11A;SCN5A;SCN10A;HCN4;SCN4A;SCN9A;HCN1	Ran GTPase binding	10	0.0284215	BIRC5;RCBTB2;TNPO2;RANBP1;XPO1;NUTF2;IPO13;KPNB1;XPOT;RANBP2	calcium ion homeostasis	34	0.00237547	JAK2;TRPC5;S100A14;RYR3;GPR32;GRIN2B;CCL13;GRIN2A;ADCYAP1R1;ADCY8;PRKCB;CXCR6;GRM5;DRD5;OCM;CMKLR1;METTL21C;PDE6B;HRH4;P2RX3;JPH3;UBASH3B;CCL7;CCR6;CAPN3;ATP2B2;CCL1;NMUR2;ANK2;CACNA1A;ATP13A5;HTR2A;TGM2;CCL11
autocrine signaling	1	0.0117627	SERPINB3	SRP-dependent cotranslational protein targeting to membrane	32	7.16379e-10	SRP14;RPL21;RPL10;RPLP2;RPL37A;SRP9;RPS7;RPL30;RPS15A;RPS3A;RPL35;RPS8;RPL8;RPLP1;RPS14;RPL6;RPL37;RPL31;RPS11;ZFAND2B;RPS3;RPS15;RPL13;RPSA;RPLP0;RPS2;RPS12;RPL22;RPL18A;RPL10A;RPL4;RPS16	maintenance of cell number	3	0.00967022	SS18;FANCC;SOX9	intracellular cyclic nucleotide activated cation channel activity	6	0.00036294	CNGA2;HCN4;KCNA10;CNGA4;CNGB3;HCN1	RNA polymerase II repressing transcription factor binding	10	0.0284215	BBS7;DDRGK1;PPARA;PPARG;SIN3A;BBS10;YY1;MIER1;TCF7L2;MIER3	GABA receptor activity	5	0.0024835	GABRE;GABRB1;GABRA6;GABRA4;GABRP
positive regulation of glomerular mesangial cell proliferation	1	0.0117627	SERPINB7	establishment of protein localization to organelle	102	9.07164e-10	SRP14;RNF31;SCRIB;DHRS4;RPL21;RPL10;RPLP2;RPL37A;YWHAB;ACOX1;MAPK1;PEX10;RANBP2;SRP9;RPS7;KPNB1;PEX26;CHCHD4;RPL30;RPS15A;PMM2;RPS3A;KPNA4;ARIH2;HTRA2;HSPD1;RPL35;RPS8;RPL8;RPLP1;RPS14;PEX1;PEX19;IDH1;YWHAZ;PEX7;NIPBL;RPL6;RPL37;BAD;YWHAG;NAGPA;RPL31;RPS11;ZFAND2B;GOSR2;CCT4;TYSND1;RPS3;RPS15;HGS;SIAH3;HSPA8;CDK1;CCT6A;NUP88;ATG13;IPO9;MAPK14;NEDD4;IDE;TIMM10B;RPL13;NABP2;NUTF2;MFN2;DDIT3;RPSA;LM…	appendage morphogenesis	3	0.00985092	HOXA10;BAK1;SOX9	cyclic nucleotide-gated ion channel activity	6	0.00036294	CNGA2;HCN4;KCNA10;CNGA4;CNGB3;HCN1	cell cycle	339	1.00686e-12	EPS8;JADE1;DYNLT3;ACTR3;ERCC2;MAP3K8;SDCCAG8;RCBTB1;NSUN2;FANCA;PARD6G;NEK9;CDK17;TOM1L1;TERF2;TTL;MAP10;BUB1;SOX9;STAMBP;CDC34;TIPRL;TUBB;ANGEL2;FIGNL1;TTK;BIRC5;SPDYA;SOX4;CNOT10;CCNDBP1;ZNF207;WEE1;UBE2L3;CABLES1;CHEK2;USP47;RFC3;STAG3;NAA50;USP39;PLCB1;STK35;CCNYL1;ZNF703;MFN2;CHMP7;HSP90AA1;ITGB3BP;DDRGK1;RBBP4;H2AFX;NUDT16;DDIT3;TTC19;ASNS;PRDM5;SEH1L;VCPIP1;E2F3;FES;POC1A;GAS1;AURKA;CCAR1;…	response to biotic stimulus	60	0.00260497	DEFB4B;JAK2;DEFB105A;SCGB1A1;DEFB104A;SPAG11B;S100A14;TLR2;IRF8;AICDA;IRGM;DHX58;CCL13;IFITM3;LCE3A;DEFB107A;SPON2;DEFA5;DMBT1;HPGD;NLRP9;S100A9;OPRM1;DEFB124;LRAT;CCL2;FGA;CLEC4D;DEFB106A;AIM2;S100A12;DEFB128;LALBA;LPO;LILRB1;COTL1;SYK;CARD8;CD226;RRP1B;ZC3HAV1;TREM2;RIOK3;CRTAM;NLRP1;MPO;DEFB123;CCL4L1;DEFB115;IFNA4;PRF1;FGB;PGLYRP3;DEFB116;CLPS;UGT1A1;NLRP10;CRP;CCL11;LYZL2
positive regulation of natural killer cell cytokine production	1	0.0117627	CD226	peptide metabolic process	134	2.21447e-09	RNF139;MIF4GD;DHFR;RPL21;PAIP2B;EIF5;RPL10;EIF2S2;EIF3B;RPLP2;ZNF598;RPL37A;RPL22L1;MAPK1;CNOT6;EIF4A1;SRP9;RPS7;CAPRIN1;NCL;EIF4G2;EIF2AK2;RPL30;MRPS25;RPS15A;RPS3A;MAGOH;MRPL28;AURKAIP1;MRPL37;RBM3;AIMP1;RPL35;RPS8;RPL8;RPLP1;MPV17L2;RPS14;EIF2B1;IDH1;EEF2;LSM14A;IARS;RPL6;SOD1;RPL37;EIF2B4;SHMT1;RPL31;MRPL9;EEF1D;RPS11;MRPL51;MTG1;GPX1;SEC11C;THOP1;NGF;SAMD4A;RPS3;GGA3;ZC3H15;EIF1AX;MRPL24;RPS…	limb morphogenesis	3	0.00985092	HOXA10;BAK1;SOX9	transmitter-gated ion channel activity	16	0.000372007	CHRNB2;GRIK5;GRIN2B;GABRR2;GRIN2A;GLRA1;GABRB1;GABRE;GABRB3;GLRA3;CHRNA4;GRID1;GRIK3;GRIN3B;GABRA3;HTR3E	catalytic complex	271	7.48557e-12	HINT1;MED31;JADE1;DYNLT3;ERCC2;RNF217;PHF12;PPP2R1B;SEC11C;BRD9;TSEN34;PRPSAP2;PHF10;GAR1;SMARCD2;GPD2;KDM5B;UBE2A;TAF6L;FBXO27;ERC1;GNB1;FBXL4;NDUFAF1;BRPF3;ATP1B1;DYNLRB2;KLHL24;ABCD4;PHKA1;UBE2L3;KCTD10;USP47;NAA50;PHKA2;ARID1A;SDHC;DROSHA;PDCD6;NDUFS4;GAN;PPP2R3A;NCOA6;SNRNP40;RBBP4;HDAC10;MSL1;F3;DR1;EXOSC6;TAF10;ACVR1;PAXIP1;NEDD4;TEX10;MAGOH;ENO3;FBXW4;SIK2;DLAT;DHDDS;CCNH;ERCC3;CUL9;MMS19…	cellular calcium ion homeostasis	33	0.00266611	JAK2;TRPC5;RYR3;GPR32;GRIN2B;CCL13;GRIN2A;ADCYAP1R1;ADCY8;PRKCB;CXCR6;GRM5;DRD5;OCM;CMKLR1;METTL21C;PDE6B;HRH4;P2RX3;JPH3;UBASH3B;CCL7;CCR6;CAPN3;ATP2B2;CCL1;NMUR2;ANK2;CACNA1A;ATP13A5;HTR2A;TGM2;CCL11
regulation of growth hormone receptor signaling pathway	1	0.0117627	JAK2	cotranslational protein targeting to membrane	32	2.32265e-09	SRP14;RPL21;RPL10;RPLP2;RPL37A;SRP9;RPS7;RPL30;RPS15A;RPS3A;RPL35;RPS8;RPL8;RPLP1;RPS14;RPL6;RPL37;RPL31;RPS11;ZFAND2B;RPS3;RPS15;RPL13;RPSA;RPLP0;RPS2;RPS12;RPL22;RPL18A;RPL10A;RPL4;RPS16	oligosaccharide metabolic process	2	0.009925	FBP1;B3GALNT1	postsynaptic membrane	53	0.000453403	CHRNB2;GRIK5;CTNNA2;SCRIB;GRIN2B;KCNA1;HTR2A;SLC8A3;DCC;CACNG3;PTPRO;GABRR2;GRIN2A;KCNH1;ATP2B2;DLGAP3;GLRA1;CACNG2;GABRB1;TMEM108;GABRE;TIAM1;OPRM1;CHRM3;ANK2;GABRB3;GABRP;GLRA3;LIN7C;CHRNA4;GRID1;SLC6A1;DGKI;GABBR2;LRRC4B;NTRK3;GRIK3;GABRQ;GRIN3B;TENM2;CNTN1;FBXO45;ARF1;HTR5A;SLC6A3;GABRA3;SORCS3;DAGLB;KCND3;HSPA8;SHANK1;ARHGEF9;EFNB3	regulation of cell cycle	226	1.18733e-10	JADE1;DYNLT3;ERCC2;SDCCAG8;NSUN2;CDK17;TOM1L1;TERF2;TTL;MAP10;BUB1;SOX9;TIPRL;TUBB;ANGEL2;FIGNL1;TTK;SPDYA;SOX4;CNOT10;CCNDBP1;ZNF207;WEE1;CABLES1;CHEK2;USP47;PLCB1;CCNYL1;ZNF703;MFN2;HSP90AA1;DDRGK1;RBBP4;H2AFX;NUDT16;DDIT3;ASNS;E2F3;POC1A;GAS1;AURKA;MEPCE;STAG2;PAXIP1;CNOT6;PHIP;TMEM8B;NDE1;ZWINT;CASP3;CCNH;NABP1;NUP214;ERCC3;CUL9;RBM14-RBM4;CDK18;DYNLL1;NAE1;RPS27L;GTSE1;CHFR;CAMK2N1;KIF20B;PP…	ligand-gated cation channel activity	12	0.00278771	RYR3;GRIN2B;GRIN2A;ASIC2;GRIK3;ASIC5;CNGA2;P2RX3;JPH3;CNGB3;GRIK5;GRIA2
nuclear migration along microtubule	1	0.0117627	TRIM58	protein localization to organelle	148	2.62957e-09	SRP14;RNF31;SCRIB;IK;DHRS4;RPL21;RPL10;RPLP2;RPL37A;YWHAB;ACOX1;MAPK1;HNRNPU;PEX10;RANBP2;GSK3B;RER1;SRP9;RPS7;KPNB1;PEX26;CHCHD4;EZH2;RPL30;RPS15A;PMM2;RPS3A;KPNA4;ARIH2;TTK;ARL13B;HTRA2;HSPD1;GNL3;UBL4A;HRAS;RPL35;RPS8;RPL8;RPLP1;RPS14;PEX1;YBX1;PEX19;IDH1;YWHAZ;PEX7;NIPBL;RPL6;RPL37;BAD;YWHAG;NAGPA;RPL31;RPS11;DNAJB6;ZFAND2B;ARF6;GOSR2;CCT4;TYSND1;RPS3;GGA3;RPS15;HGS;SIAH3;HSPA8;CDK1;TBRG1;ABH…	peroxisomal matrix	2	0.0107022	NUDT7;ACOT2	response to calcium ion	29	0.000512048	APOBEC1;FGA;SLC25A24;KCNH1;SCN5A;CACNG2;TSHB;SYT11;FGG;RYR1;ADCY8;CHP2;SLC6A1;TRPC3;RYR3;TRPM2;SYT8;FGB;ACER1;CARF;CCND1;SYT5;RYR2;SYT17;CASR;HSPA5;WNK1;PDCD6;CALM1	negative regulation of gene expression	322	1.44703e-09	IGBP1;XIAP;EIF2AK2;PHF12;SIX4;TLE1;MRPL44;TIRAP;FZD8;RPL13;PHF10;RNF139;KLF3;ETV3;PRDX5;KDM5B;RPL10;TERF2;LRRFIP1;ALKBH5;SOX9;PATZ1;HNRNPA0;ANGEL2;ZNF608;BIRC5;ZNF345;ASF1A;IGF2BP2;CNOT10;LANCL2;UPF3A;BATF3;MAGED1;MPHOSPH8;MEX3D;SRP9;GZF1;FOXO3;BHLHE40;ADAR;USP47;H3F3A;CBFB;ARID1A;PLCB1;RPL28;DNAJB5;FMR1;TNRC6A;ETV6;NONO;NCL;DROSHA;ZNF703;ZNF658;BCL7A;SQSTM1;MXD1;DDRGK1;RCOR2;RBBP4;SATB1;HDAC10;N…	regulation of synaptic transmission, glutamatergic	9	0.00289315	TNR;OPHN1;GRM6;GRIK3;GRM5;CACNG2;CACNG3;NPS;HTR2A
Calcitriol	1	0.0117627	HOXA10	peptide biosynthetic process	114	3.18205e-09	RNF139;MIF4GD;DHFR;RPL21;PAIP2B;EIF5;RPL10;EIF2S2;EIF3B;RPLP2;ZNF598;RPL37A;RPL22L1;MAPK1;CNOT6;EIF4A1;SRP9;RPS7;CAPRIN1;NCL;EIF4G2;EIF2AK2;RPL30;MRPS25;RPS15A;RPS3A;MAGOH;MRPL28;AURKAIP1;MRPL37;RBM3;AIMP1;RPL35;RPS8;RPL8;RPLP1;MPV17L2;RPS14;EIF2B1;EEF2;LSM14A;IARS;RPL6;RPL37;EIF2B4;SHMT1;RPL31;MRPL9;EEF1D;RPS11;MRPL51;MTG1;SAMD4A;RPS3;ZC3H15;EIF1AX;MRPL24;RPS15;TRMT10C;COPS5;KHSRP;EIF3L;ATXN2;MR…	microbody lumen	2	0.0107022	NUDT7;ACOT2	voltage-gated potassium channel activity	20	0.000577341	KCNE1;KCNQ2;KCNA1;KCNQ3;KCNB2;KCNH1;KCNK18;KCNT1;KCNT2;KCNG2;KCNE2;HCN4;KCNK2;KCNG4;KCNA10;SNAP25;KCND3;HCN1;KCNU1;KCNH3	negative regulation of cellular macromolecule biosynthetic process	261	2.61528e-09	IGBP1;EIF2AK2;PHF12;SIX4;TLE1;FZD8;PHF10;RNF139;KLF3;ETV3;PRDX5;KDM5B;RPL10;TERF2;POT1;LRRFIP1;SOX9;PATZ1;ZNF608;BIRC5;ZNF345;ASF1A;IGF2BP2;CNOT10;LANCL2;BATF3;MAGED1;MPHOSPH8;MEX3D;SRP9;GZF1;FOXO3;BHLHE40;CHEK2;USP47;H3F3A;CBFB;ARID1A;PLCB1;DNAJB5;FMR1;TNRC6A;ETV6;NONO;NCL;ZNF703;ZNF658;BCL7A;SQSTM1;MXD1;RCOR2;SATB1;HDAC10;DDIT3;PRDM5;E2F3;IMPACT;DR1;HSBP1;MEPCE;ZNF639;STAG2;PUS7;FOXP1;NEDD4;CRE…	sodium channel complex	5	0.00305783	SCN4A;GRIK3;GRIK5;SCN5A;SCN11A
S-Hydroxycysteine	1	0.0117627	GSTA1	chromosome organization	180	4.26057e-09	HJURP;IK;CENPU;PCGF5;MAPK1;TLK1;HNRNPU;BRD2;SAFB;KPNB1;EZH2;BRD9;CHAF1A;BRMS1L;GPS1;TTN;POLE4;TTK;MCM6;RNF4;RFC5;NCOA3;KMT2B;RCBTB1;PRDM4;GNL3;BUB1;GEN1;MBTD1;C6orf89;UBE2E1;ERCC2;HIRIP3;ZNF207;NTMT1;NIPBL;SMARCD2;HIST1H4G;IWS1;PADI1;FOXA1;KDM5B;JADE1;PSMG2;MEN1;HNRNPC;KMT2D;PADI2;ATXN3;COPS6;HLTF;TOP2A;PHF2;HIST2H2AC;MCMBP;ZNF451;IGF2;NR1H4;CCT4;PRKD1;PYGO2;PCGF6;HMGB1;ENY2;PCGF1;MAD2L1;GCG;NAP1…	sulfur compound catabolic process	2	0.0111006	NUDT7;FMOD	synapse	154	0.000588329	CHRNB2;SLC22A2;WNT7A;SAMD4A;BSN;GRIK5;OLFM1;PRIMA1;RPH3A;NAPG;CTNNA2;SCRIB;GRIN2B;MCTP2;USH2A;NTF3;KCNA1;HTR2A;GRM6;FGA;BCL11A;SLC8A3;DCC;CACNG3;PTPRO;GABRR2;VAMP3;GRIN2A;KCNH1;APBA3;PRKCB;ATP2B2;DLGAP3;GLRA1;CACNG2;MAGI2;FCGR2B;PHB;SYPL2;GABRB1;CADM3;SYT11;TMEM108;SCN10A;GABRE;EPHB1;TIAM1;CDH8;OPRM1;ATCAY;CHRM3;AP3D1;ANK2;GABRB3;GABRP;ADCY8;RPL6;KIF5A;GLRA3;ACAN;LIN7C;CHRNA4;GRID1;NGF;SLC6A1;DGK…	negative regulation of biosynthetic process	286	2.7325e-09	IGBP1;EIF2AK2;PHF12;SIX4;TLE1;FZD8;PHF10;RNF139;KLF3;ETV3;PRDX5;KDM5B;RPL10;TERF2;POT1;LRRFIP1;SOX9;PATZ1;ZNF608;PF4;BIRC5;ZNF345;ASF1A;IGF2BP2;CNOT10;LANCL2;BATF3;MAGED1;MPHOSPH8;MEX3D;SRP9;GZF1;FOXO3;BHLHE40;CHEK2;USP47;H3F3A;CBFB;ERLIN2;ARID1A;PLCB1;DNAJB5;FMR1;TNRC6A;ETV6;NONO;NCL;ZNF703;ZNF658;BCL7A;SQSTM1;MXD1;RCOR2;SATB1;HDAC10;DDIT3;PRDM5;E2F3;IMPACT;CCAR1;DR1;HSBP1;MEPCE;ZNF639;STAG2;PUS…	G protein-coupled serotonin receptor signaling pathway	6	0.00311571	HTR5A;OR6T1;HTR1E;HRH4;HTR2A;HRH2
D-Serine	1	0.0117627	SERPINB3	protein targeting	81	1.01241e-08	SRP14;RNF31;DHRS4;RPL21;RPL10;RPLP2;RPL37A;YWHAB;ACOX1;PEX10;SRP9;RPS7;PEX26;CHCHD4;RPL30;RPS15A;PMM2;RPS3A;ARIH2;HTRA2;HSPD1;HRAS;RPL35;RPS8;RPL8;RPLP1;RPS14;PEX1;PEX19;IDH1;YWHAZ;PEX7;RPL6;RPL37;YWHAG;NAGPA;RPL31;FUT10;RPS11;ZFAND2B;GOSR2;KCNE1;TYSND1;RPS3;RPS15;HGS;ICMT;SIAH3;HSPA8;OS9;HAP1;ATG13;NEDD4;ZDHHC14;IDE;TIMM10B;RPL13;MFN2;RPSA;LMAN1;UBE2L3;UQCRC2;PMPCA;GNPTG;ATG4C;RPLP0;RPS2;ANK3;RP…	primary lysosome	3	0.0113677	NAPRT;ARSA;LYZ	cellular cation homeostasis	90	0.000588387	FGF2;GRIN2B;HTR2A;FPR1;CCL3;GRINA;SLC8A3;CXCR1;FTL;GRIN2A;ADRA1B;PRKCB;TRPC4;ATP2B2;CMKLR1;ADCYAP1R1;HCRTR2;FPR3;CSRP3;SYPL2;GPR32;PDE6B;FAM155A;SLC4A8;HMGB1;TRDN;CCL7;SLC24A1;RYR1;AP3D1;NMUR2;ANK2;CCL8;ADCY8;CCL11;PLCG2;CCKBR;S100A9;FTMT;SOD1;TRPC7;TRPC3;SLC24A5;HEPH;BDKRB1;ATP13A5;CACNA1A;S100A8;ATP6V1H;XCR1;TMEM64;RAB38;RYR3;SLC11A2;TRPM2;GNA15;TRPC6;DHRS7C;ARF1;GPR4;BDKRB2;CCL1;METTL21C;CCL13…	negative regulation of cellular biosynthetic process	282	2.95435e-09	IGBP1;EIF2AK2;PHF12;SIX4;TLE1;FZD8;PHF10;RNF139;KLF3;ETV3;PRDX5;KDM5B;RPL10;TERF2;POT1;LRRFIP1;SOX9;PATZ1;ZNF608;BIRC5;ZNF345;ASF1A;IGF2BP2;CNOT10;LANCL2;BATF3;MAGED1;MPHOSPH8;MEX3D;SRP9;GZF1;FOXO3;BHLHE40;CHEK2;USP47;H3F3A;CBFB;ERLIN2;ARID1A;PLCB1;DNAJB5;FMR1;TNRC6A;ETV6;NONO;NCL;ZNF703;ZNF658;BCL7A;SQSTM1;MXD1;RCOR2;SATB1;HDAC10;DDIT3;PRDM5;E2F3;IMPACT;CCAR1;DR1;HSBP1;MEPCE;ZNF639;STAG2;PUS7;FO…	G protein-coupled serotonin receptor activity	6	0.00311571	HTR5A;OR6T1;HTR1E;HRH4;HTR2A;HRH2
S-Hexylglutathione	1	0.0117627	GSTA1	cytosolic ribosome	33	1.38911e-08	RPL21;RPL10;RPLP2;RPL37A;RPL22L1;RPS7;EIF2AK2;RPL30;RPS15A;RPS3A;RPL35;RPS8;RPL8;RPLP1;RPS14;RPL6;RPL37;RPL31;RPS11;RPS3;RPS15;MRPL1;RPL13;RPSA;EIF2A;RPLP0;RPS2;RPS12;RPL22;RPL18A;RPL10A;RPL4;RPS16	azurophil granule	3	0.0113677	NAPRT;ARSA;LYZ	outward rectifier potassium channel activity	7	0.000632838	KCNK18;KCNT1;KCNT2;KCNK2;KCNA10;KCND3;KCNU1	negative regulation of macromolecule biosynthetic process	271	6.33143e-09	IGBP1;EIF2AK2;PHF12;SIX4;TLE1;FZD8;PHF10;RNF139;KLF3;ETV3;PRDX5;KDM5B;RPL10;TERF2;POT1;LRRFIP1;SOX9;PATZ1;ZNF608;PF4;BIRC5;ZNF345;ASF1A;IGF2BP2;CNOT10;LANCL2;BATF3;MAGED1;MPHOSPH8;MEX3D;SRP9;GZF1;FOXO3;BHLHE40;CHEK2;USP47;H3F3A;CBFB;ARID1A;PLCB1;DNAJB5;FMR1;TNRC6A;ETV6;NONO;NCL;ZNF703;ZNF658;BCL7A;SQSTM1;MXD1;RCOR2;SATB1;HDAC10;DDIT3;PRDM5;E2F3;IMPACT;CCAR1;DR1;HSBP1;MEPCE;ZNF639;STAG2;PUS7;FOXP1…	regulation of cytosolic calcium ion concentration	27	0.00323122	JAK2;TRPC5;RYR3;GPR32;GRIN2B;GRIN2A;ADCYAP1R1;ADCY8;CXCR6;GRM5;OCM;CMKLR1;METTL21C;PDE6B;HRH4;P2RX3;JPH3;UBASH3B;CCR6;CAPN3;ATP2B2;CCL1;NMUR2;ANK2;CACNA1A;HTR2A;TGM2
2-(1,1-DIMETHYLETHYL)9-FLUORO-3,6-DIHYDRO-7H-BENZ[H]-IMIDAZ[4,5-F]ISOQUINOLIN-7-ONE	1	0.0117627	JAK2	ribosomal subunit	46	1.50716e-08	RPL21;RPL10;RPLP2;RPL37A;RPL22L1;RPS7;RPL30;RPS15A;RPS3A;MRPL28;MRPL37;RBM3;RPL35;RPS8;RPL8;RPLP1;MPV17L2;RPS14;RPL6;RPL37;RPL31;MRPL9;RPS11;MRPL51;RPS3;MRPL24;RPS15;MRPL1;RPL13;MRPL38;RPSA;MRPS26;EIF2A;MRPS21;RPLP0;MRPS10;RPS2;RPS12;MRPL52;MRPL46;RPL22;NDUFAB1;RPL18A;RPL10A;RPL4;RPS16	DNA-binding transcription factor activity	11	0.0113739	ZNF211;ZNF418;HOXA10;ZNF510;ZNF613;BTG2;ARX;SOX9;TCF20;ZSCAN23;CUX2	axon	87	0.000634351	MYH14;BSN;SCN8A;GRIK5;OLFM1;TUBB3;CTNNA2;ROBO2;USH2A;NTF3;KCNQ2;KIRREL3;KCNA1;KCNQ3;HTR2A;SCN11A;DCC;PTPRO;KCNH1;SCN5A;PRKCB;GLRA1;SYBU;CACNG2;SYT11;TMEM108;SCN10A;NEFM;EPHB1;TIAM1;CDH8;OPRM1;ATCAY;AP3B2;CHRM3;AP3D1;ANK2;ERMN;ADCY8;KIF5A;ATAT1;SOD1;NGF;SLC6A1;DGKI;CRH;LRRC4B;NTRK3;TUBB4A;SYT8;DSCAM;GRIK3;TENM2;KCNK2;NFASC;SLC6A3;GRIPAP1;SCN4A;TNN;NRG1;GSK3B;CNR1;CRTAC1;SNAP25;SYT5;BRSK1;KCNIP3;MA…	negative regulation of nucleobase-containing compound metabolic process	268	7.69114e-09	IGBP1;PHF12;SIX4;TLE1;TIRAP;FZD8;PHF10;KLF3;ETV3;PRDX5;KDM5B;RPL10;TERF2;POT1;LRRFIP1;SOX9;PATZ1;HNRNPA0;ANGEL2;ZNF608;BIRC5;ZNF345;ASF1A;LANCL2;BATF3;MAGED1;MPHOSPH8;GZF1;FOXO3;BHLHE40;CHEK2;USP47;H3F3A;CBFB;ARID1A;PLCB1;DNAJB5;FMR1;ETV6;NONO;ZNF703;ZNF658;BCL7A;SQSTM1;MXD1;NUDT16L1;RCOR2;SATB1;HDAC10;NUDT16;DDIT3;PRDM5;E2F3;IMPACT;CCAR1;DR1;HSBP1;MEPCE;ZNF639;STAG2;FOXP1;HOXC6;NEDD4;CREM;SOX5;Z…	response to external biotic stimulus	58	0.00334664	DEFB4B;JAK2;DEFB105A;SCGB1A1;DEFB104A;SPAG11B;S100A14;TLR2;IRF8;AICDA;IRGM;DHX58;CCL13;IFITM3;LCE3A;DEFB107A;SPON2;DEFA5;DMBT1;HPGD;NLRP9;S100A9;OPRM1;DEFB124;LRAT;CCL2;FGA;CLEC4D;DEFB106A;AIM2;S100A12;DEFB128;LALBA;LPO;LILRB1;COTL1;SYK;CARD8;RRP1B;ZC3HAV1;TREM2;RIOK3;NLRP1;MPO;DEFB123;CCL4L1;DEFB115;IFNA4;PRF1;FGB;PGLYRP3;DEFB116;CLPS;UGT1A1;NLRP10;CRP;CCL11;LYZL2
myeloid cell differentiation	4	0.0120879	JAK2;TRIM58;ACTN1;HBZ	RNA processing	144	2.46095e-08	CCAR1;RBM15B;SRSF11;CCNT1;IK;DHX16;HNRNPA0;CCNH;BOP1;SF3B3;HNRNPU;U2AF2;RPS7;SAFB;WDR55;CLK2;HNRNPUL1;HEATR1;RBM5;SRSF3;SMNDC1;TRMT11;MAGOH;DUSP11;AURKAIP1;HNRNPF;RBM39;TXNL4A;APOBEC4;DICER1;PTBP1;RBM3;SF1;BTRC;PRPF6;PAPOLG;RPL35;RPS8;LAGE3;NUDT21;SCAF11;SNRNP200;NSUN2;RPS14;ERCC2;TBL3;ZC3H14;YBX1;ELP6;RTCB;IWS1;IMP4;POLR2J;HNRNPC;RBM6;THOC3;TRUB1;ABT1;SNRPG;EMG1;PNN;KRR1;TSEN34;RPS15;POLR2I;RBM1…	dendritic spine morphogenesis	2	0.0115055	ARHGAP33;CUX2	cation transmembrane transport	113	0.0006556	KCNE1;COX8C;SCN8A;FGF2;GRIN2B;KCNQ2;KCNA1;KCNQ3;HTR2A;CCL3;SCN11A;SLC8A3;CACNG3;KCNB2;DPP10;GRIN2A;KCNH1;SCN5A;KCNK18;PMPCA;TRPC4;ATP2B2;COX7B2;CACNG2;PHB;KCNT1;SCN10A;FAM155A;NALCN;TRDN;OPRM1;KCNK9;SLC24A1;RYR1;OTOP1;ANK2;CACNA2D4;PLCG2;KCNT2;TRPC7;TRPC3;SLC24A5;KCNG2;BDKRB1;CACNA1A;ATP6V1H;CRH;KCNN1;CNGA2;PKD2L1;RYR3;SLC11A2;TRPM2;DPP6;FGF14;GRIN3B;COX6C;KCNE2;HCN4;SLC6A7;KCNK2;TRPC6;DHRS7C;ARF…	mitotic cell cycle	188	8.75216e-09	EPS8;JADE1;DYNLT3;ERCC2;SDCCAG8;NEK9;TOM1L1;TTL;MAP10;BUB1;STAMBP;CDC34;TUBB;ANGEL2;TTK;SPDYA;SOX4;CNOT10;ZNF207;WEE1;CHEK2;USP47;NAA50;PLCB1;CHMP7;HSP90AA1;TTC19;ASNS;PRDM5;SEH1L;VCPIP1;POC1A;GAS1;AURKA;PHF23;MEPCE;STAG2;TAF10;ACVR1;CNOT6;PHIP;CHAMP1;TMEM8B;NDE1;ZWINT;NABP1;NUP214;ERCC3;CUL9;DYNLL1;NAE1;TUBGCP3;SPC25;RPS27L;GTSE1;CHFR;KIF20B;REEP4;CLSPN;FBXL12;EPGN;YWHAG;MDM2;XRCC3;ACD;RAD9B;PBR…	calcium-mediated signaling	19	0.00359859	GRIN2B;IRGM;NRG1;GRIN2A;CDH13;CIB1;CXCR6;GRM5;BHLHA15;CMKLR1;P2RX3;JPH3;CCR6;SYK;NMUR2;TREM2;CCL4L1;ANK2;C10orf71
mammary gland epithelium development	2	0.0122341	JAK2;TBX3	nuclear-transcribed mRNA catabolic process, nonsense-mediated decay	34	3.20656e-08	RPL21;RPL10;RPLP2;RPL37A;RPS7;RPL30;RPS15A;RPS3A;MAGOH;UPF2;PNRC2;RPL35;RPS8;RPL8;RPLP1;RPS14;RPL6;RPL37;RPL31;RPS11;RPS3;RPS15;RPL13;RPSA;SMG5;RPLP0;RPS2;EIF3E;RPS12;RPL22;RPL18A;RPL10A;RPL4;RPS16	postsynapse organization	3	0.0119693	ACTN1;ARHGAP33;CUX2	calcium channel complex	16	0.000663995	CACNG3;TRPC4;CACNG2;RYR1;CACNA2D4;CATSPERG;CACNA1A;PKD2L1;RYR3;CACNA1E;CACNA1B;CACNA1I;RYR2;CACNA1H;CALM1;CATSPER1	organonitrogen compound biosynthetic process	323	1.35939e-08	ADK;MIF4GD;MRPL28;ADAL;ATIC;EIF2AK2;MTR;MRPL44;TIRAP;MRPL46;PRPSAP2;EIF2S2;RPL13;ALDOA;SLC35C1;MRPS18A;PTS;SECISBP2L;RNF139;APIP;MRPS10;UCKL1;MGAT4C;RPL10;GFM2;CHDH;CTPS2;NME4;ZDHHC14;EIF4G3;DPH7;HS2ST1;ALG12;B3GNT5;EIF2S3;GLCE;HDDC2;MRPL17;CDADC1;SLC35B3;C1GALT1C1;NME9;IGF2BP2;SOX4;CNOT10;UPF3A;PMM1;LARS2;CHSY3;MEX3D;SRP9;SLC25A1;EIF1;FOXO3;MGAT4A;STARD7;UGDH;XYLT2;B4GALT3;DARS;APRT;MRPS25;PLCB1…	G protein-coupled amine receptor activity	8	0.00370306	TAAR8;HTR5A;OR6T1;HTR1E;HRH4;OR56A5;HTR2A;HRH2
actomyosin	2	0.0128997	LURAP1;ACTN1	DNA metabolic process	154	3.54549e-08	CDC34;NT5M;MUTYH;ATRIP;CCNH;PGBD5;MAPK1;HNRNPU;FGF2;KPNB1;ORC1;EZH2;CHAF1A;NUDT16L1;RCHY1;GPS1;POLE4;MCM6;RFC5;ST20;ACTR5;HSPD1;GNL3;DICER1;HRAS;GEN1;ERCC2;ZFP57;UVSSA;NIPBL;TDRD9;CLSPN;APTX;MEN1;POLR2J;HNRNPC;ATXN3;COPS6;TOP2A;WAS;KLHDC3;MCMBP;USP47;APAF1;CCT4;RPS3;TSN;HMGB1;TDP1;POLR2I;STOX1;SDE2;NUDT15;REPIN1;COPS5;CDK9;CEBPG;APOBEC1;FANCB;CDK1;POLG2;TBRG1;RAD17;APEX1;CHRAC1;CTCF;CCT6A;ANKRD1;…	positive regulation of neurological system process	2	0.013189	ITGA2;CUX2	postsynaptic specialization membrane	22	0.000675687	CHRNB2;GRIK5;SCRIB;GRIN2B;DCC;CACNG3;PTPRO;GRIN2A;ATP2B2;GLRA1;CACNG2;TIAM1;CHRM3;GRID1;DGKI;LRRC4B;HTR5A;GABRA3;SORCS3;KCND3;HSPA8;EFNB3	protein modification by small protein conjugation	164	1.563e-08	MED31;XIAP;FKBP1A;RNF217;WSB2;RNF139;UBE2A;CDC34;TRIM8;FBXO27;TRIM25;FBXL4;SOX4;KLHL24;UVSSA;UBE2L3;RNF103;KCTD10;CBFB;N4BP1;PDCD6;GAN;HSP90AA1;DDRGK1;PEX10;ITCH;PTTG1IP;VCPIP1;PHF23;FBXW2;KCTD11;PAXIP1;NEDD4;KLHL17;RNF187;FBXW4;HECTD2;PPIL2;MKRN1;CUL9;AMER1;NAE1;CHFR;KEAP1;RNF150;UBE2F;WDR48;TMEM189-UBE2V1;FBXL12;RNF4;TRAF7;CBLC;UBE2I;RNF141;FBXO2;UBE2K;TRIM21;TULP4;RNF208;MDM2;FBXL5;MKRN2;MED10…	modulation of chemical synaptic transmission	31	0.00401213	JAK2;GRIN2B;GRIN2A;TNR;OPHN1;ADCY8;GRM6;WNT7A;GRIK3;NPAS4;PRKCB;GRM5;DRD5;CACNG2;P2RX3;JPH3;SORCS3;FGF14;CACNG3;EPHB1;GRIK5;NAPB;NPS;NPY5R;NCDN;CACNA1A;HTR2A;NTF3;HRH2;DCC;IGSF9B
post-embryonic eye morphogenesis	1	0.0140989	BAK1	structural constituent of ribosome	40	4.44477e-08	RPL21;RPL10;RPLP2;RPL37A;RPL22L1;RPS7;RPL30;MRPS25;RPS15A;RPS3A;MRPL28;MRPL37;RPL35;RPS8;RPL8;RPLP1;RPS14;RPL6;RPL37;RPL31;MRPL9;RPS11;MRPL51;RPS3;MRPL24;RPS15;MRPL1;RPL13;RPSA;MRPS21;RPLP0;RPS2;RPS12;MRPL52;MRPL46;RPL22;RPL18A;RPL10A;RPL4;RPS16	multicellular organismal homeostasis	5	0.0133381	PCTP;CTSK;SOX9;UCP1;LYZ	regulation of cytosolic calcium ion concentration	55	0.000687998	FGF2;GRIN2B;HTR2A;FPR1;CCL3;SLC8A3;CXCR1;GRIN2A;ADRA1B;TRPC4;ATP2B2;CMKLR1;ADCYAP1R1;HCRTR2;FPR3;GPR32;PDE6B;FAM155A;HMGB1;TRDN;RYR1;NMUR2;ANK2;ADCY8;PLCG2;CCKBR;TRPC7;TRPC3;BDKRB1;CACNA1A;XCR1;TMEM64;RYR3;TRPM2;GNA15;TRPC6;DHRS7C;GPR4;BDKRB2;CCL1;METTL21C;UBASH3B;CNR1;CX3CR1;CEMIP;KNG1;PLCZ1;RYR2;JPH3;PVALB;P2RX3;PTGIR;TGFB1;CALM1;C5AR1	protein ubiquitination	155	1.76022e-08	MED31;XIAP;FKBP1A;RNF217;WSB2;RNF139;UBE2A;CDC34;TRIM8;FBXO27;TRIM25;FBXL4;SOX4;KLHL24;UVSSA;UBE2L3;RNF103;KCTD10;CBFB;N4BP1;PDCD6;GAN;HSP90AA1;PEX10;ITCH;PTTG1IP;VCPIP1;PHF23;FBXW2;KCTD11;PAXIP1;NEDD4;KLHL17;RNF187;FBXW4;HECTD2;PPIL2;MKRN1;CUL9;AMER1;CHFR;KEAP1;RNF150;WDR48;TMEM189-UBE2V1;FBXL12;RNF4;TRAF7;CBLC;UBE2I;RNF141;FBXO2;UBE2K;TRIM21;TULP4;RNF208;MDM2;FBXL5;MKRN2;MED10;RTF1;BIRC6;ARRDC3…	regulation of trans-synaptic signaling	31	0.00415507	JAK2;GRIN2B;GRIN2A;TNR;OPHN1;ADCY8;GRM6;WNT7A;GRIK3;NPAS4;PRKCB;GRM5;DRD5;CACNG2;P2RX3;JPH3;SORCS3;FGF14;CACNG3;EPHB1;GRIK5;NAPB;NPS;NPY5R;NCDN;CACNA1A;HTR2A;NTF3;HRH2;DCC;IGSF9B
cerebral cortex GABAergic interneuron migration	1	0.0140989	ARX	ribonucleoprotein complex biogenesis	83	4.64538e-08	EIF5;RPL10;BOP1;EIF3B;ATXN2L;CNOT6;RPS7;WDR55;HEATR1;RBM5;GTF3A;TXNL4A;DICER1;SF1;BTRC;PRPF6;RPL35;RPS8;NUDT21;SCAF11;MPV17L2;SNRNP200;RPS14;TBL3;LSM14A;IMP4;RPL6;ABT1;SNRPG;EMG1;KRR1;RPS15;URB1;EIF3L;ATXN2;MRPL1;PWP1;SNRPB;NUP88;EIF4B;DHX30;FTSJ3;GAR1;PTGES3;GEMIN8;RPSA;DDX17;NOP10;NOP56;EIF2A;MTERF3;RPF2;LUC7L;CNOT1;SNRPD3;NOC2L;ZNHIT6;SBDS;RPLP0;SHQ1;RPS2;XPO1;EIF3E;PPAN;EIF3A;MTG2;SF3B1;NGDN;…	photoreceptor cell differentiation	2	0.0140686	RPGRIP1;SOX9	cellular ion homeostasis	91	0.000717837	FGF2;GRIN2B;HTR2A;FPR1;CCL3;GRINA;SLC8A3;CXCR1;FTL;GRIN2A;FGF23;ADRA1B;PRKCB;TRPC4;ATP2B2;CMKLR1;ADCYAP1R1;HCRTR2;FPR3;CSRP3;SYPL2;GPR32;PDE6B;FAM155A;SLC4A8;HMGB1;TRDN;CCL7;SLC24A1;RYR1;AP3D1;NMUR2;ANK2;CCL8;ADCY8;CCL11;PLCG2;CCKBR;S100A9;FTMT;SOD1;TRPC7;TRPC3;SLC24A5;HEPH;BDKRB1;ATP13A5;CACNA1A;S100A8;ATP6V1H;XCR1;TMEM64;RAB38;RYR3;SLC11A2;TRPM2;GNA15;TRPC6;DHRS7C;ARF1;GPR4;BDKRB2;CCL1;METTL21C…	cell cycle process	243	1.82666e-08	EPS8;JADE1;ACTR3;ERCC2;SDCCAG8;NSUN2;FANCA;PARD6G;NEK9;TOM1L1;TERF2;TTL;MAP10;BUB1;SOX9;STAMBP;CDC34;TUBB;FIGNL1;TTK;SPDYA;SOX4;CNOT10;ZNF207;WEE1;UBE2L3;CHEK2;USP47;RFC3;STAG3;NAA50;PLCB1;MFN2;CHMP7;HSP90AA1;DDRGK1;RBBP4;NUDT16;DDIT3;TTC19;SEH1L;FES;POC1A;GAS1;AURKA;PHF23;MEPCE;STAG2;TAF10;ACVR1;PAXIP1;CNOT6;PHIP;CHAMP1;NDE1;ZWINT;NABP1;ERCC3;CUL9;RBM14-RBM4;DYNLL1;NAE1;TUBGCP3;SPC25;RPS27L;GTSE…	potassium channel complex	11	0.00439052	DPP6;KCNB2;KCNA1;GRIK3;DPP10;KCNQ3;KCNA4;KCNIP4;KCNV1;GRIK5;KCNQ2
interneuron migration	1	0.0140989	ARX	cellular amide metabolic process	161	6.00511e-08	RNF139;MIF4GD;DHFR;RPL21;PAIP2B;EIF5;RPL10;EIF2S2;EIF3B;RPLP2;ZNF598;GBA;RPL37A;RPL22L1;MAPK1;PMVK;CNOT6;EIF4A1;SRP9;RPS7;CAPRIN1;NCL;EIF4G2;EIF2AK2;RPL30;MRPS25;RPS15A;RPS3A;MAGOH;ARG2;MRPL28;AURKAIP1;MTHFD2;SMPD1;SPTLC2;HTRA2;MRPL37;RBM3;AIMP1;RPL35;RPS8;RPL8;RPLP1;MPV17L2;RPS14;EIF2B1;IDH1;EEF2;ACER1;LSM14A;IARS;RPL6;SOD1;RPL37;EIF2B4;SHMT1;RPL31;MRPL9;EEF1D;RPS11;MRPL51;ATIC;ORMDL1;ELOVL4;MTG…	glycosphingolipid metabolic process	2	0.0140686	ARSA;B3GALNT1	positive regulation of calcium-mediated signaling	12	0.000863813	CCL4L1;CCL3;C10orf71;TRDN;CHP2;CAMTA1;CDH13;NRG1;PTBP1;P2RX3;LMCD1;CALM1	negative regulation of RNA metabolic process	246	2.14194e-08	IGBP1;PHF12;SIX4;TLE1;TIRAP;FZD8;PHF10;KLF3;ETV3;PRDX5;KDM5B;RPL10;LRRFIP1;SOX9;PATZ1;HNRNPA0;ANGEL2;ZNF608;BIRC5;ZNF345;ASF1A;LANCL2;BATF3;MAGED1;MPHOSPH8;GZF1;FOXO3;BHLHE40;USP47;H3F3A;CBFB;ARID1A;PLCB1;DNAJB5;FMR1;ETV6;NONO;ZNF703;ZNF658;BCL7A;SQSTM1;MXD1;RCOR2;SATB1;HDAC10;NUDT16;DDIT3;PRDM5;E2F3;IMPACT;CCAR1;DR1;HSBP1;MEPCE;ZNF639;FOXP1;HOXC6;NEDD4;CREM;SOX5;ZNF131;HNRNPD;THRB;TAGLN3;PPARA;S…	ion transport	94	0.00440824	SLC35A5;ALG10B;CATSPER2;HEPH;TRPC5;SLC5A2;FGF23;KCNK9;RYR3;GABRE;GRIN2B;SLC6A2;FTHL17;DPP6;PIEZO2;OTOP1;KCNB2;GRIN2A;ADCYAP1R1;SLC26A5;SLC1A6;KCNA1;ASIC2;GRM6;SCN4A;GRIK3;DPP10;KCNT2;PRKCB;OPRM1;LRRC8E;TMEM38A;ASIC5;KCNK18;GRM5;KCNQ3;CCL2;BHLHA15;CNGA2;GABRB1;SLC2A9;FABP1;CLCN6;CACNG2;COX7B2;METTL21C;GLRA1;KCNA4;P2RX3;KCNIP4;JPH3;LILRB1;KCNT1;CNGB3;UBASH3B;KCNV1;GABRA6;SLCO3A1;CAPN3;SYK;ATP2B2;FG…
positive regulation of Fc receptor mediated stimulatory signaling pathway	1	0.0140989	CD226	modification-dependent protein catabolic process	103	1.04144e-07	RNF139;CDC34;BAG5;FBXW5;GBA;BBS7;PSMF1;USP50;GSK3B;TRIM3;RPS7;VPS37A;BIRC6;SYVN1;PSMD8;PCYOX1;PSMD6;RCHY1;ARIH2;RNF4;TRIB1;JKAMP;DNAJB9;BTRC;PSMD9;UBE2E1;FBXO45;RNF144B;RBCK1;PSMA7;TMEM67;FOXRED2;HSP90B1;ATXN3;CUL2;UBA6;RNF167;ZFAND2B;USP47;PSMB1;MAD2L1;FBXO11;SIAH3;CDC16;CDK1;USP19;UBXN1;PCBP2;ERLIN1;OS9;MAN1B1;RNF126;NEDD4;CDC26;UBE2S;RNF8;BAG6;DCAF11;RNF168;DDRGK1;SUMO2;DDIT3;LONP1;UBE2L3;RNF1…	organ growth	3	0.0145574	AKAP13;ARX;SOX9	transmembrane transport	191	0.00106285	KCNE1;ABCC12;GJA10;UNC79;CHRNB2;SLC22A2;COX8C;SCN8A;GRIK5;FGF2;SLC6A16;PEX19;STOML3;ATP10A;GRIN2B;SLC10A2;KCNQ2;KCNA1;KCNQ3;HTR2A;CCL3;ADIPOQ;SLC5A2;SCN11A;SLC8A3;SLC25A24;ANO5;CACNG3;SLC35A1;GABRR2;BEST2;KCNB2;DPP10;GRIN2A;KCNH1;SCN5A;KCNK18;PRKCB;PMPCA;TRPC4;ATP2B2;COX7B2;GLRA1;CACNG2;PHB;GABRB1;KCNT1;SCN10A;FAM155A;SLC4A8;NALCN;GABRE;ANO2;TRDN;OPRM1;KCNK9;SLC35A5;SLCO3A1;SLC24A1;RYR1;NMUR2;OTO…	transferase activity, transferring phosphorus-containing groups	197	2.25375e-08	ADK;ERCC2;EIF2AK2;N4BP2;CDC42BPA;MAP3K8;FN3K;PRPSAP2;VRK2;UCKL1;NEK9;CDK17;TERF2;NME4;BUB1;WNK4;PMVK;TTK;NME9;WEE1;POLI;MAST2;PHKA1;STK16;CHEK2;MMD;PHKA2;STKLD1;ERLIN2;ETNK1;EPHB4;STK35;PRKD1;HSP90AA1;SQSTM1;EIF2B3;PAPSS2;GALK2;DDR2;ULK2;FES;AURKA;ACVR1;TGFBR2;EPHA4;SIK2;POMK;TXK;HMGXB3;AAK1;CCNH;PGK1;ERCC3;SRPK3;CDK18;UCK1;EFNA3;PDK1;ITPKB;KARS;CDK5R1;TK2;POLR2L;AK7;PIM1;STK24;PTK6;CHRAC1;DMPK;G…	positive regulation of ERK1 and ERK2 cascade	20	0.00461866	FGF23;CCL13;NTRK3;CIB1;OPRM1;PDGFD;CCL2;FGA;CCL7;DDT;EPHB1;MARCO;CCL1;TREM2;DNAJC27;CCL4L1;FGB;NPY5R;HTR2A;CCL11
natural killer cell cytokine production	1	0.0140989	CD226	nucleolus	148	1.05128e-07	SPATA2;RBM15B;SERTAD3;MIF4GD;CCNT1;HJURP;DDX50;BOP1;HSPA9;SF3B3;PCGF5;STK35;ACOX1;RPS7;NCL;WDR55;ORC1;HEATR1;TMA16;RPS3A;DUSP11;NOL7;GNL3;PTBP1;TAF13;RBM3;DNAJB9;BTRC;SLC29A2;CCDC137;RPL35;SCAF11;C6orf89;NSUN2;RPS14;CD3EAP;HIRIP3;SNAPC5;TBL3;ZNF207;ZC3H14;IMP4;APTX;FOXA1;LLPH;EEF1D;RPS11;ATXN3;HLTF;ABT1;TOP2A;CUL2;PHF2;EMG1;SAMD4A;KRR1;TSEN34;RPS3;ZC3H15;POLR2I;FBXO11;STOX1;S100A13;URB1;HSPA8;DDX…	lysosome	6	0.0148969	NAPRT;FMOD;ARSA;CTSK;LYZ;CTSW	potassium ion transport	39	0.00134584	KCNE1;KCNQ2;KCNA1;KCNQ3;HTR2A;KCNB2;DPP10;KCNH1;KCNK18;VIP;KCNT1;NALCN;KCNK9;ANK2;KCNT2;SLC24A5;KCNG2;KCNN1;PKD2L1;DPP6;KCNE2;HCN4;KCNK2;CCT8L2;KCNG4;MTMR6;KCNA10;SNAP25;KCNIP3;KCND3;GJA5;KCNIP1;HCN1;SLC24A2;WNK1;SLC9A8;ATP1A4;KCNU1;KCNH3	ubiquitin-like protein transferase activity	98	3.30459e-08	MED31;XIAP;RNF217;RNF139;UBE2A;UBL4A;CDC34;FBXO27;TRIM25;FBXL4;UBE2L3;RNF103;KCTD10;ITCH;FBXW2;NEDD4;RNF187;FBXW4;HECTD2;PPIL2;MKRN1;CHFR;RNF150;UBE2F;TMEM189-UBE2V1;FBXL12;RNF4;TRAF7;CBLC;UBE2I;RNF141;FBXO2;UBE2K;TRIM21;RNF208;MDM2;FBXL5;MED10;BIRC6;HERC6;HERC3;SH3RF3;UHRF1;UBR2;ANAPC4;ZNRF3;RCHY1;TRIM56;VHL;RNF168;HUWE1;LONRF1;TSPAN17;FBXW11;ANKIB1;TRAIP;HDAC7;BARD1;RNF38;UBE2Q1;UBE2E1;TRIM11;T…	inhibitory extracellular ligand-gated ion channel activity	4	0.00472526	GABRE;GLRA1;GABRA6;GABRA4
regulation of natural killer cell cytokine production	1	0.0140989	CD226	intracellular protein transport	169	1.15337e-07	SRP14;RNF31;SCRIB;RBM15B;PDCD6;SRSF11;COPB1;TBC1D22B;DHRS4;RPL21;RPL10;ARF1;RPLP2;RPL37A;YWHAB;ACOX1;MAPK1;TLK1;HNRNPU;PEX10;U2AF2;RANBP2;GSK3B;SRP9;RPS7;RAB9B;KPNB1;PEX26;SEC24D;SYVN1;CHCHD4;SRSF3;RPL30;CTDSPL2;RPS15A;ARF5;PMM2;RPS3A;KPNA4;ARIH2;MAGOH;UPF2;HTRA2;HSPD1;ARFIP2;TMED4;HRAS;RPL35;RPS8;RPL8;RPLP1;RPS14;PEX1;PEX19;IDH1;TMED3;YWHAZ;PEX7;IWS1;RPL6;PTPN14;RPL37;YWHAG;NAGPA;XPO4;HSP90B1;RP…	cellular response to heparin	1	0.0149514	SOX9	intrinsic component of postsynaptic membrane	24	0.00155379	CHRNB2;GRIK5;KCNA1;HTR2A;SLC8A3;DCC;CACNG3;PTPRO;GRIN2A;GLRA1;CACNG2;OPRM1;CHRM3;GRID1;SLC6A1;LRRC4B;NTRK3;CNTN1;HTR5A;SLC6A3;GABRA3;SORCS3;KCND3;EFNB3	regulation of mitotic cell cycle	126	4.42931e-08	JADE1;DYNLT3;ERCC2;SDCCAG8;TOM1L1;TTL;BUB1;TUBB;ANGEL2;TTK;SOX4;CNOT10;ZNF207;WEE1;CHEK2;USP47;PLCB1;HSP90AA1;ASNS;GAS1;AURKA;MEPCE;STAG2;CNOT6;PHIP;TMEM8B;NDE1;ZWINT;NABP1;ERCC3;CUL9;DYNLL1;NAE1;RPS27L;GTSE1;CHFR;KIF20B;CLSPN;EPGN;YWHAG;MDM2;XRCC3;RAD9B;DMRT1;IK;NPM2;DDX3X;PTTG1;GEN1;ANAPC4;CAV2;ATRX;PAFAH1B1;IQGAP1;PKD2;BCL6;PPP2R1A;FOXA1;BAX;DCLRE1B;FGF8;UBE2E1;EREG;LRP5;CDKN1A;SIN3A;HES1;CEP1…	postsynaptic membrane	25	0.00533388	GABRE;GRIN2B;GRIN2A;KCNA1;GRIK3;NTRK3;HTR5A;OPRM1;GRM5;GABRB1;CACNG2;GLRA1;SORCS3;GABRA6;ATP2B2;CACNG3;GABRA4;GRIK5;GRIA2;GABRP;SLC6A9;ANK2;HTR2A;DCC;IGSF9B
Bcl-2 family protein complex	1	0.0140989	BAK1	ribonucleoprotein complex assembly	51	1.3632e-07	EIF5;RPL10;BOP1;EIF3B;ATXN2L;CNOT6;RBM5;TXNL4A;DICER1;SF1;PRPF6;NUDT21;SCAF11;MPV17L2;SNRNP200;RPS14;LSM14A;RPL6;ABT1;SNRPG;RPS15;EIF3L;ATXN2;SNRPB;EIF4B;DHX30;PTGES3;GEMIN8;RPSA;EIF2A;MTERF3;RPF2;LUC7L;CNOT1;SNRPD3;ZNHIT6;SBDS;RPLP0;SHQ1;EIF3E;PPAN;EIF3A;SF3B1;PUM2;NPM1;PRPF3;PRPF19;EIF3J;EIF2S3;CLNS1A;SF3A2	nucleoside bisphosphate catabolic process	1	0.0149514	NUDT7	sodium channel complex	8	0.00156517	SCN8A;GRIK5;SCN11A;SCN5A;SCN10A;GRIK3;SCN4A;SCN9A	protein modification by small protein conjugation or removal	201	5.5257e-08	MED31;XIAP;FKBP1A;RNF217;WSB2;RNF139;SPATA2;OTUD5;UBE2A;STAMBP;CDC34;TRIM8;USP18;FBXO27;TRIM25;FBXL4;SOX4;KLHL24;UVSSA;OTUD4;UBE2L3;RNF103;KCTD10;USP47;USP39;CBFB;OTUD3;N4BP1;USP11;PDCD6;GAN;HSP90AA1;DDRGK1;PEX10;ITCH;PTTG1IP;VCPIP1;PHF23;FBXW2;KCTD11;TAF10;PAXIP1;NEDD4;USP45;KLHL17;USP12;RNF187;FBXW4;HECTD2;PPIL2;MKRN1;CUL9;AMER1;NAE1;SMAD2;CHFR;KEAP1;CLSPN;RNF150;UBE2F;WDR48;TMEM189-UBE2V1;FBXL…	Sorafenib	5	0.00534982	CYP2C8;CYP2B6;CYP2C9;UGT1A1;CYP2C19
Barr body	1	0.0140989	SMCHD1	modification-dependent macromolecule catabolic process	104	1.40608e-07	RNF139;CDC34;BAG5;FBXW5;GBA;BBS7;PSMF1;USP50;GSK3B;TRIM3;RPS7;VPS37A;BIRC6;SYVN1;PSMD8;PCYOX1;PSMD6;RCHY1;ARIH2;RNF4;TRIB1;JKAMP;DNAJB9;BTRC;PSMD9;UBE2E1;FBXO45;RNF144B;RBCK1;PSMA7;TMEM67;FOXRED2;HSP90B1;ATXN3;CUL2;UBA6;RNF167;ZFAND2B;USP47;PSMB1;MAD2L1;FBXO11;SIAH3;CDC16;CDK1;USP19;UBXN1;PCBP2;ERLIN1;OS9;MAN1B1;RNF126;NEDD4;CDC26;UBE2S;RNF8;BAG6;DCAF11;RNF168;DDRGK1;SUMO2;DDIT3;LONP1;UBE2L3;RNF1…	ribonucleoside bisphosphate catabolic process	1	0.0149514	NUDT7	voltage-gated sodium channel complex	6	0.00179134	SCN8A;SCN11A;SCN5A;SCN10A;SCN4A;SCN9A	negative regulation of transcription, DNA-templated	221	1.51733e-07	IGBP1;PHF12;SIX4;TLE1;FZD8;PHF10;KLF3;ETV3;PRDX5;KDM5B;RPL10;LRRFIP1;SOX9;PATZ1;ZNF608;BIRC5;ZNF345;ASF1A;LANCL2;BATF3;MAGED1;MPHOSPH8;GZF1;FOXO3;BHLHE40;USP47;H3F3A;CBFB;ARID1A;PLCB1;DNAJB5;ETV6;NONO;ZNF703;ZNF658;BCL7A;SQSTM1;MXD1;RCOR2;SATB1;HDAC10;DDIT3;PRDM5;E2F3;IMPACT;DR1;HSBP1;MEPCE;ZNF639;FOXP1;NEDD4;CREM;SOX5;ZNF131;THRB;TAGLN3;PPARA;SMAD2;TSHZ1;BMP6;CDK5R1;THRA;NCK1;UBE2I;TBL1XR1;MDM2;…	anion channel activity	10	0.00546189	GABRE;LRRC8E;GABRB1;CLCN6;GLRA1;GABRA6;GABRA4;CLCN7;NMUR2;GABRP
interleukin-12 receptor binding	1	0.0140989	JAK2	amide biosynthetic process	125	1.59394e-07	RNF139;MIF4GD;DHFR;RPL21;PAIP2B;EIF5;RPL10;EIF2S2;EIF3B;RPLP2;ZNF598;GBA;RPL37A;RPL22L1;MAPK1;CNOT6;EIF4A1;SRP9;RPS7;CAPRIN1;NCL;EIF4G2;EIF2AK2;RPL30;MRPS25;RPS15A;RPS3A;MAGOH;ARG2;MRPL28;AURKAIP1;SMPD1;SPTLC2;MRPL37;RBM3;AIMP1;RPL35;RPS8;RPL8;RPLP1;MPV17L2;RPS14;EIF2B1;EEF2;LSM14A;IARS;RPL6;RPL37;EIF2B4;SHMT1;RPL31;MRPL9;EEF1D;RPS11;MRPL51;ATIC;ORMDL1;ELOVL4;MTG1;ELOVL1;SAMD4A;RPS3;ZC3H15;EIF1AX…	purine nucleoside bisphosphate catabolic process	1	0.0149514	NUDT7	cellular response to potassium ion	5	0.0019368	CYP11B1;SOD1;CYP11B2;CARF;CACNA1H	ubiquitin-protein transferase activity	91	1.62672e-07	MED31;XIAP;RNF217;RNF139;UBE2A;CDC34;FBXO27;TRIM25;FBXL4;UBE2L3;RNF103;KCTD10;ITCH;FBXW2;NEDD4;RNF187;FBXW4;HECTD2;PPIL2;MKRN1;CHFR;RNF150;TMEM189-UBE2V1;FBXL12;RNF4;TRAF7;CBLC;UBE2I;RNF141;FBXO2;UBE2K;TRIM21;RNF208;MDM2;FBXL5;MED10;BIRC6;HERC6;HERC3;SH3RF3;UHRF1;UBR2;ANAPC4;ZNRF3;RCHY1;TRIM56;VHL;RNF168;HUWE1;LONRF1;TSPAN17;FBXW11;ANKIB1;TRAIP;BARD1;RNF38;UBE2Q1;UBE2E1;TRIM11;TRIM2;HLTF;MYLIP;MD…	integral component of postsynaptic specialization membrane	9	0.00567021	GRIN2A;HTR5A;CACNG2;GLRA1;SORCS3;CACNG3;GABRA4;GRIK5;DCC
Busulfan	1	0.0140989	GSTA1	transferase complex	125	1.59394e-07	RNF31;RBM15B;PDCD6;CCNT1;MED31;FBXW5;CCNH;PCGF5;SYVN1;PHC3;EZH2;RPN1;RCHY1;POLR3C;ARIH2;POLE4;CKS2;KMT2B;CCNI;SPTLC2;PRDM4;TAF13;BTRC;UBE2E1;ERCC2;PRKAB1;FBXO45;RNF144B;ASB2;RBCK1;KDM5B;JADE1;MEN1;POLR2J;KMT2D;NAA20;ORMDL1;TRIM21;MAT2A;CUL2;ZNF451;SNRPG;PHKA2;USP47;PCGF6;ENY2;PCGF1;SIK2;POLR2I;FBXO11;TAF6L;CDC16;KLHL12;CDK9;HSPA8;CDK1;MED21;CHRAC1;SNRPB;RB1CC1;OS9;PHKA1;ATG13;NEDD4;CDC26;UBE2S;RN…	response to L-ascorbic acid	1	0.0149514	ITGA2	integral component of postsynaptic membrane	23	0.00194309	CHRNB2;GRIK5;KCNA1;HTR2A;SLC8A3;DCC;CACNG3;PTPRO;GRIN2A;GLRA1;CACNG2;OPRM1;CHRM3;GRID1;SLC6A1;LRRC4B;NTRK3;HTR5A;SLC6A3;GABRA3;SORCS3;KCND3;EFNB3	cellular response to DNA damage stimulus	162	1.7785e-07	ERCC2;XIAP;FANCA;UBE2A;TERF2;ALKBH5;TIPRL;NEIL2;TRIM25;FIGNL1;ASF1A;SPDYA;SOX4;CNOT10;UVSSA;POLI;FOXO3;CHEK2;USP47;HMGN1;RFC3;FMR1;NONO;ERCC5;NUDT16L1;NCOA6;H2AFX;NUDT16;DDIT3;PTTG1IP;AURKA;PAXIP1;NEDD4;USP45;CNOT6;CASP3;FANCG;CCNH;NABP1;ERCC3;RBM14-RBM4;MMS19;RPS27L;GTSE1;DDX1;CLSPN;WDR48;TMEM189-UBE2V1;PARP2;POLR2L;ZDHHC16;IMMP2L;MDM2;XRCC3;ACD;RAD9B;APBB1;ZBTB5;ATMIN;NPLOC4;UHRF1;PTTG1;GEN1;SH…	ammonium ion binding	9	0.00567021	HTR5A;DRD5;HTR1E;GPR119;SATL1;SLC5A7;OR56A5;HTR2A;CRP
homotypic cell-cell adhesion	2	0.0146311	ACTN1;CSRP1	DNA repair	91	1.70324e-07	MUTYH;ATRIP;CCNH;CHAF1A;NUDT16L1;RCHY1;GPS1;RFC5;ACTR5;GEN1;ERCC2;UVSSA;NIPBL;CLSPN;APTX;MEN1;POLR2J;ATXN3;COPS6;WAS;USP47;RPS3;HMGB1;TDP1;POLR2I;COPS5;CDK9;CEBPG;FANCB;CDK1;POLG2;RAD17;APEX1;CHEK2;POLI;RNF8;RNF168;MEIOB;FANCG;PPP4R2;NABP2;GINS2;APLF;PCNA;ERCC6;COPS3;ALKBH2;DDX11;CINP;NSMCE1;ERCC8;EME2;BABAM1;NCOA6;PARP4;RFC4;INO80E;H2AFX;MAD2L2;TRIP12;PTTG1;RAD51C;USP1;RAD54L;PDS5B;TERF2IP;SUMO1…	positive regulation of platelet-derived growth factor receptor signaling pathway	1	0.0149514	F3	voltage-gated calcium channel activity	12	0.00250347	CACNG3;CACNG2;OPRM1;RYR1;CACNA2D4;CACNA1A;CACNA1E;CNR1;CACNA1B;CACNA1I;CACNA1H;CATSPER1	mitotic cell cycle process	159	1.7943e-07	EPS8;JADE1;ERCC2;SDCCAG8;NEK9;TOM1L1;MAP10;BUB1;STAMBP;CDC34;TUBB;TTK;SPDYA;SOX4;CNOT10;ZNF207;WEE1;CHEK2;USP47;NAA50;PLCB1;CHMP7;HSP90AA1;TTC19;SEH1L;POC1A;AURKA;PHF23;MEPCE;STAG2;TAF10;ACVR1;CNOT6;PHIP;CHAMP1;NDE1;ZWINT;NABP1;ERCC3;CUL9;DYNLL1;NAE1;TUBGCP3;SPC25;RPS27L;GTSE1;CHFR;KIF20B;REEP4;CLSPN;FBXL12;EPGN;YWHAG;MDM2;XRCC3;ACD;RAD9B;CHTF8;DMRT1;JTB;CCNY;IK;KIF2A;CDKN2C;NPM2;DDX3X;PTTG1;GEN1…	chloride channel activity	9	0.00567021	GABRE;GABRB1;CLCN6;GLRA1;GABRA6;GABRA4;CLCN7;NMUR2;GABRP
Chemical carcinogenesis	2	0.0160844	GSTA1;GSTM5	regulation of cell cycle	168	1.76624e-07	PEBP1;SCRIB;CCNT1;IK;ATRIP;FBXW5;CCNH;BOP1;PTK6;HNRNPU;CNOT6;EIF4G2;BIRC6;ORC1;PHC3;EZH2;RPS15A;CKS2;TTK;RNF4;AURKAIP1;NAE1;CCP110;ANGEL2;CCNI;HTRA2;HRAS;PIDD1;BTRC;PSME2;PLAGL1;TIPRL;BUB1;GEN1;C6orf89;UBE2E1;NSUN2;ERCC2;PRKAB1;ZNF207;TUBB;NIPBL;MEPCE;TMEM67;CLSPN;BAD;YWHAG;FOXA1;JADE1;PSMG2;MEN1;TAS1R2;CDK16;TRIM21;TOP2A;CDK2AP2;CUL2;RNF167;IGF2;USP47;APAF1;PCGF6;MAD2L1;STOX1;SDE2;CDC16;COPS5;CD…	disaccharide biosynthetic process	1	0.0149514	FBP1	MHC class II protein complex binding	6	0.00272496	MS4A1;HLA-DOB;HLA-DMB;HLA-DOA;HSPA8;HLA-DRA	nucleoplasm part	207	2.52888e-07	HINT1;MED31;JADE1;ERCC2;PHF12;PHF10;FANCA;GAR1;ETV3;KDM5B;TERF2;ICE2;ALKBH5;UNC45A;CDC34;TRIM8;TAF6L;ANGEL2;TRIM25;FBXL4;BRPF3;HOXC10;FYTTD1;PRPF40B;POLI;THOC3;BHLHE40;CHEK2;N4BP1;PLCB1;GPATCH2;FMR1;NONO;STK35;CPSF2;ARHGAP18;SQSTM1;NCOA6;ATXN2L;SNRNP40;RBBP4;H2AFX;SATB1;HDAC10;MLLT3;MSL1;PRDM5;RAPH1;DRG1;DR1;NCAPG2;TAF10;PAXIP1;TEX10;MAGOH;ZWINT;FANCG;THRB;CCNH;ERCC3;AMER1;RBM14-RBM4;MMS19;CHFR;S…	presynaptic membrane	15	0.00589222	SLC6A2;CADM3;GRIN2A;SLC1A6;KCNA1;ADCY8;GRM6;GRIK3;OPRM1;GAD2;GLRA1;P2RX3;GRIK5;SLC6A9;HTR2A
response to mycotoxin	1	0.0164298	BAK1	ubiquitin-dependent protein catabolic process	101	2.21317e-07	RNF139;CDC34;BAG5;FBXW5;GBA;BBS7;PSMF1;USP50;GSK3B;TRIM3;RPS7;VPS37A;BIRC6;SYVN1;PSMD8;PSMD6;RCHY1;ARIH2;RNF4;TRIB1;JKAMP;DNAJB9;BTRC;PSMD9;UBE2E1;FBXO45;RNF144B;RBCK1;PSMA7;TMEM67;FOXRED2;HSP90B1;ATXN3;CUL2;UBA6;RNF167;ZFAND2B;USP47;PSMB1;MAD2L1;FBXO11;SIAH3;CDC16;CDK1;USP19;UBXN1;PCBP2;ERLIN1;OS9;MAN1B1;RNF126;NEDD4;CDC26;UBE2S;RNF8;BAG6;DCAF11;RNF168;DDRGK1;SUMO2;DDIT3;UBE2L3;RNF19B;ANAPC4;ANK…	positive regulation of extracellular matrix assembly	1	0.0149514	SOX9	calcium-activated potassium channel activity	6	0.00272496	KCNK18;KCNN1;PKD2L1;CCT8L2;MTMR6;KCNU1	cellular response to stress	329	2.63855e-07	IGBP1;ERCC2;XIAP;EIF2AK2;MTR;MAP3K8;TIRAP;AGT;FZD8;FANCA;VRK2;RNF139;PRDX5;IL1F10;UBE2A;TERF2;ALKBH5;DDAH1;TIPRL;NEIL2;TRIM25;GNB1;FIGNL1;ASF1A;SPDYA;SOX4;CNOT10;UVSSA;POLI;FOXO3;RNF103;CHEK2;USP47;HMGN1;RFC3;ERLIN2;PLCB1;DNAJB9;FMR1;TNRC6A;NONO;PDCD6;ERCC5;MFN2;SLC12A6;PRKD1;HSP90AA1;SQSTM1;NUDT16L1;DDRGK1;NCOA6;G6PD;EXTL3;H2AFX;ITCH;NUDT16;DDIT3;MAP1LC3A;ASNS;EGLN1;SEH1L;PTTG1IP;IMPACT;AURKA;AN…	GABAergic synapse	10	0.00592164	GABRE;ADCY8;PRKCB;GABRB1;GAD2;GNB3;GABRA6;GABRA4;GABRP;CACNA1A
activation of cysteine-type endopeptidase activity involved in apoptotic process by cytochrome c	1	0.0164298	BAK1	organelle envelope	173	3.13485e-07	SLC25A24;PEBP1;RBM15B;VRK2;DTYMK;UQCRFS1;TMEM18;RANBP2;MCUR1;KPNB1;SLC25A53;CUEDC2;SDHC;CHCHD4;TMEM33;MRPS25;FKBP8;KPNA4;CYC1;ADRA1B;MRPL28;AURKAIP1;HTRA2;HSPD1;TTC19;UQCR11;NDUFS6;TXNL4A;MCU;MRPL37;PCYT1A;SLC29A2;CHCHD5;SLC25A10;AGPAT4;MPV17L2;TUBB;RNF144B;YBX1;DCTN5;SLC25A30;KCNH1;RTCB;LMNB2;NDUFA4;SLC25A5;UQCRH;SLC30A1;NDUFA6;SOD1;BAD;SLC25A3;IMMT;XPO4;MRPL9;MRPL51;PPP2R2B;ATXN3;SLC25A44;MTG1;…	activation of store-operated calcium channel activity	1	0.0149514	STIM1	regulation of response to external stimulus	104	0.00314626	MAS1;PLEK;FGF2;PDGFD;CTNNA2;ROBO2;S100A12;NTF3;CCL4L1;AJAP1;CCL3;ADIPOQ;FGA;TLR2;CCL18;PTPRO;VAMP3;MICB;NLRP10;A2M;CMKLR1;CARD16;FCGR2B;PHB;KRT1;SYT11;PDE6B;HMGB1;AIM2;TIAM1;SPATA2;OPRM1;CD200R1;MMP28;PRKCQ;CCL7;TSLP;FGG;IL21;SIGLEC10;S100A9;LILRB1;AHSG;S100A8;TNFSF14;TRIB1;PADI2;CMA1;TRIM15;HRG;CCL2;DDX58;NTRK3;DSCAM;METAP2;FGB;NR1H4;PLG;CDH13;GPX1;SLC6A3;NPY5R;DDT;GBA;JAM3;PRKG1;HSPD1;CCL1;AIPL…	posttranscriptional regulation of gene expression	107	2.7535e-07	MIF4GD;EIF2AK2;MRPL44;TIRAP;SECISBP2L;RNF139;RPL10;ALKBH5;EIF4G3;DPH7;HNRNPA0;ANGEL2;IGF2BP2;SOX4;CNOT10;UPF3A;MEX3D;SRP9;EIF1;FOXO3;ADAR;H3F3A;FMR1;TNRC6A;NCL;DROSHA;DNAJC24;EIF5;EIF4E3;IMPACT;ZC3H7A;EXOSC6;PUS7;LSM14B;MAGOH;CNOT6;HNRNPD;CAPRIN2;NUP214;LARP4B;RPS27L;SMAD2;DDX1;CIRBP;NCK1;POLR2L;FAM129A;DGCR8;SMAD1;PPARG;GAPDH;YWHAZ;CARHSP1;HELZ;XPO1;CDC123;ZC3H14;MTG1;DDX3X;DHX29;UQCC1;AXIN2;KHS…	postsynaptic density membrane	9	0.00619419	GRIN2B;GRIN2A;GRM5;CACNG2;SORCS3;ATP2B2;CACNG3;GRIK5;DCC
post-embryonic camera-type eye development	1	0.0164298	BAK1	envelope	173	3.13485e-07	SLC25A24;PEBP1;RBM15B;VRK2;DTYMK;UQCRFS1;TMEM18;RANBP2;MCUR1;KPNB1;SLC25A53;CUEDC2;SDHC;CHCHD4;TMEM33;MRPS25;FKBP8;KPNA4;CYC1;ADRA1B;MRPL28;AURKAIP1;HTRA2;HSPD1;TTC19;UQCR11;NDUFS6;TXNL4A;MCU;MRPL37;PCYT1A;SLC29A2;CHCHD5;SLC25A10;AGPAT4;MPV17L2;TUBB;RNF144B;YBX1;DCTN5;SLC25A30;KCNH1;RTCB;LMNB2;NDUFA4;SLC25A5;UQCRH;SLC30A1;NDUFA6;SOD1;BAD;SLC25A3;IMMT;XPO4;MRPL9;MRPL51;PPP2R2B;ATXN3;SLC25A44;MTG1;…	endolysosome lumen	1	0.0149514	CTSK	cellular potassium ion transport	34	0.00320274	KCNE1;KCNQ2;KCNA1;KCNQ3;KCNB2;DPP10;KCNH1;KCNK18;KCNT1;NALCN;KCNK9;ANK2;KCNT2;KCNG2;KCNN1;PKD2L1;DPP6;KCNE2;HCN4;KCNK2;CCT8L2;KCNG4;MTMR6;KCNA10;SNAP25;KCNIP3;KCND3;KCNIP1;HCN1;WNK1;SLC9A8;ATP1A4;KCNU1;KCNH3	negative regulation of nucleic acid-templated transcription	227	3.03873e-07	IGBP1;PHF12;SIX4;TLE1;FZD8;PHF10;KLF3;ETV3;PRDX5;KDM5B;RPL10;LRRFIP1;SOX9;PATZ1;ZNF608;BIRC5;ZNF345;ASF1A;LANCL2;BATF3;MAGED1;MPHOSPH8;GZF1;FOXO3;BHLHE40;USP47;H3F3A;CBFB;ARID1A;PLCB1;DNAJB5;ETV6;NONO;ZNF703;ZNF658;BCL7A;SQSTM1;MXD1;RCOR2;SATB1;HDAC10;DDIT3;PRDM5;E2F3;IMPACT;CCAR1;DR1;HSBP1;MEPCE;ZNF639;FOXP1;HOXC6;NEDD4;CREM;SOX5;ZNF131;THRB;TAGLN3;PPARA;SMAD2;TSHZ1;BMP6;CDK5R1;THRA;NCK1;UBE2I;T…	Regorafenib	5	0.00632785	CYP2C8;CYP2B6;CYP2C9;UGT1A1;CYP2C19
positive regulation of IRE1-mediated unfolded protein response	1	0.0164298	BAK1	cytosolic part	52	3.36213e-07	RPL21;RPL10;RPLP2;RPL37A;RPL22L1;RPS7;BLOC1S3;EIF2AK2;RPL30;RPS15A;RPS3A;UBL4A;RPL35;RPS8;RPL8;RPLP1;ENO3;RPS14;FBXO45;RPL6;RPL37;RPL31;RPS11;HPS6;APAF1;CCT4;RPS3;NLRC4;RPS15;HSPA8;MRPL1;CCT6A;NEDD4;BAG6;IDE;RPL13;RPSA;EIF2A;NLRP6;CCT7;RPLP0;RPS2;RPS12;RPL22;RPL18A;TRIM40;RPL10A;RPL4;ENO1;CASP1;RPS16;FXN	collagen receptor activity	1	0.0149514	ITGA2	potassium ion transmembrane transport	34	0.00320274	KCNE1;KCNQ2;KCNA1;KCNQ3;KCNB2;DPP10;KCNH1;KCNK18;KCNT1;NALCN;KCNK9;ANK2;KCNT2;KCNG2;KCNN1;PKD2L1;DPP6;KCNE2;HCN4;KCNK2;CCT8L2;KCNG4;MTMR6;KCNA10;SNAP25;KCNIP3;KCND3;KCNIP1;HCN1;WNK1;SLC9A8;ATP1A4;KCNU1;KCNH3	adenyl nucleotide binding	275	3.36679e-07	KIF27;ADK;ACTR3;ERCC2;EIF2AK2;N4BP2;CDC42BPA;MAP3K8;BBS12;VRK2;ST13;UCKL1;NEK9;UBE2A;CDK17;PFN1;CTPS2;NME4;CBWD2;TTL;BUB1;CDC34;WNK4;FIGNL1;PMVK;TTK;LANCL2;ATP1B1;P2RX2;LARS2;WEE1;ABCD4;MAST2;STK16;UBE2L3;CHEK2;TTLL7;STKLD1;DARS;APRT;ETNK1;EPHB4;STK35;PRKD1;P2RX7;HSP90AA1;DDX50;PAPSS2;GALK2;DDR2;ATP6V1B2;ULK2;ABCD3;ASNS;FES;AURKA;ACVR1;DDX24;TGFBR2;ABCB9;EPHA4;CARS;DNAJA2;SIK2;POMK;ADCY3;TXK;RTCB…	detection of abiotic stimulus	13	0.00633902	AIPL1;PIEZO2;OTOP1;RP1;KCNA1;ASIC2;GRM6;RGR;PDE6B;EPHB1;GRK1;RCVRN;HTR2A
mammary gland formation	1	0.0164298	TBX3	protein targeting to membrane	43	3.96159e-07	SRP14;RPL21;RPL10;RPLP2;RPL37A;SRP9;RPS7;PEX26;RPL30;RPS15A;RPS3A;HRAS;RPL35;RPS8;RPL8;RPLP1;RPS14;PEX19;RPL6;RPL37;RPL31;RPS11;ZFAND2B;KCNE1;RPS3;RPS15;ICMT;ZDHHC14;RPL13;RPSA;ATG4C;RPLP0;RPS2;ANK3;RPS12;RPL22;RPL18A;GDI1;ASNA1;RPL10A;FIS1;RPL4;RPS16	collagen binding involved in cell-matrix adhesion	1	0.0149514	ITGA2	integral component of postsynaptic specialization membrane	16	0.00337967	CHRNB2;GRIK5;DCC;CACNG3;PTPRO;GRIN2A;GLRA1;CACNG2;CHRM3;GRID1;LRRC4B;HTR5A;GABRA3;SORCS3;KCND3;EFNB3	negative regulation of RNA biosynthetic process	227	3.46303e-07	IGBP1;PHF12;SIX4;TLE1;FZD8;PHF10;KLF3;ETV3;PRDX5;KDM5B;RPL10;LRRFIP1;SOX9;PATZ1;ZNF608;BIRC5;ZNF345;ASF1A;LANCL2;BATF3;MAGED1;MPHOSPH8;GZF1;FOXO3;BHLHE40;USP47;H3F3A;CBFB;ARID1A;PLCB1;DNAJB5;ETV6;NONO;ZNF703;ZNF658;BCL7A;SQSTM1;MXD1;RCOR2;SATB1;HDAC10;DDIT3;PRDM5;E2F3;IMPACT;CCAR1;DR1;HSBP1;MEPCE;ZNF639;FOXP1;HOXC6;NEDD4;CREM;SOX5;ZNF131;THRB;TAGLN3;PPARA;SMAD2;TSHZ1;BMP6;CDK5R1;THRA;NCK1;UBE2I;T…	intrinsic component of postsynaptic specialization membrane	9	0.00735315	GRIN2A;HTR5A;CACNG2;GLRA1;SORCS3;CACNG3;GABRA4;GRIK5;DCC
follicle-stimulating hormone secretion	1	0.0164298	TBX3	cellular protein catabolic process	119	5.19387e-07	RNF139;CDC34;BAG5;FBXW5;GBA;BBS7;CTSV;PSMF1;USP50;GSK3B;TRIM3;RPS7;VPS37A;BIRC6;SYVN1;PSMD8;PCYOX1;PSMD6;RCHY1;ARIH2;RNF4;TRIB1;JKAMP;HTRA2;DNAJB9;BTRC;PSME2;PSMD9;UBE2E1;FBXO45;RNF144B;RBCK1;PSMA7;TMEM67;FOXRED2;HSP90B1;ATXN3;GPX1;CUL2;UBA6;RNF167;ZFAND2B;USP47;PSMB1;MAD2L1;FBXO11;NUDT15;SIAH3;CDC16;CDK1;USP19;UBXN1;PCBP2;CLTC;ERLIN1;OS9;CHEK2;MAN1B1;RNF126;NEDD4;CDC26;UBE2S;RNF8;BAG6;DCAF11;IDE…	Calcitriol	1	0.0149514	HOXA10	voltage-gated calcium channel complex	11	0.0036763	CACNG3;CACNG2;RYR1;CACNA2D4;CATSPERG;CACNA1A;CACNA1E;CACNA1B;CACNA1I;CACNA1H;CATSPER1	kinase activity	167	3.572e-07	ADK;ERCC2;EIF2AK2;N4BP2;CDC42BPA;MAP3K8;FN3K;VRK2;UCKL1;NEK9;CDK17;NME4;BUB1;WNK4;PMVK;TTK;NME9;WEE1;MAST2;PHKA1;STK16;CHEK2;MMD;PHKA2;STKLD1;ERLIN2;ETNK1;EPHB4;STK35;PRKD1;HSP90AA1;SQSTM1;PAPSS2;GALK2;DDR2;ULK2;FES;AURKA;ACVR1;TGFBR2;EPHA4;SIK2;POMK;TXK;HMGXB3;AAK1;CCNH;PGK1;ERCC3;SRPK3;CDK18;UCK1;EFNA3;PDK1;ITPKB;CDK5R1;TK2;AK7;PIM1;STK24;PTK6;DMPK;GSK3B;LTBP1;SCYL1;PDGFRL;EPHA7;PRPS1;DLG2;NME1…	potassium ion transport	19	0.00739999	ALG10B;KCNK9;DPP6;KCNB2;KCNA1;DPP10;KCNT2;TMEM38A;KCNK18;KCNQ3;KCNA4;KCNIP4;KCNT1;KCNV1;VIP;NALCN;ANK2;KCNQ2;HTR2A
paracrine signaling	1	0.0164298	SERPINB3	mRNA processing	86	5.35662e-07	CCAR1;RBM15B;SRSF11;CCNT1;IK;DHX16;HNRNPA0;CCNH;SF3B3;HNRNPU;U2AF2;SAFB;HNRNPUL1;RBM5;SRSF3;SMNDC1;MAGOH;AURKAIP1;HNRNPF;RBM39;TXNL4A;APOBEC4;PTBP1;RBM3;SF1;PRPF6;PAPOLG;NUDT21;SCAF11;SNRNP200;ERCC2;ZC3H14;YBX1;IWS1;POLR2J;HNRNPC;THOC3;SNRPG;PNN;TSEN34;POLR2I;RBM11;RBFOX3;PRPF4B;CDK9;HSPA8;APOBEC1;KHSRP;DDX5;BUD13;PCBP2;SNRPB;TSEN2;MTPAP;CPSF3;PPP4R2;GEMIN8;HNRNPA3;DDX17;PUF60;RBM28;SSU72;LUC7L;R…	Sucrose	1	0.0149514	LYZ	calcium ion import	16	0.00389075	GRM6;CCL3;SLC8A3;TRPC4;FAM155A;CACNA1A;CRH;FCRL3;CCL2;TRPM2;CACNA1E;CACNA1B;CACNA1I;CACNA1H;CASR;MCUR1	regulation of cell cycle process	140	6.52679e-07	JADE1;ERCC2;SDCCAG8;TOM1L1;TERF2;TTL;MAP10;BUB1;SOX9;TUBB;TTK;SOX4;CNOT10;ZNF207;WEE1;CHEK2;USP47;PLCB1;HSP90AA1;DDRGK1;RBBP4;NUDT16;POC1A;AURKA;MEPCE;STAG2;PAXIP1;CNOT6;PHIP;NDE1;ERCC3;CUL9;RBM14-RBM4;DYNLL1;NAE1;RPS27L;GTSE1;KIF20B;PPP2R5B;CLSPN;CDK5R1;RNF4;EPGN;YWHAG;APAF1;MDM2;XRCC3;BIRC6;XPO1;DMRT1;CEP295;IK;NPM2;DDX3X;PTTG1;GEN1;ANAPC4;AXIN2;CAV2;ATRX;USP51;PAFAH1B1;TERF1;PKD2;GPR3;BCL6;PRK…	calcium ion transport	29	0.00815781	CATSPER2;TRPC5;RYR3;GRIN2B;GRIN2A;ADCYAP1R1;GRM6;PRKCB;OPRM1;CCL2;BHLHA15;CACNG2;METTL21C;P2RX3;JPH3;LILRB1;UBASH3B;CAPN3;ATP2B2;FGF14;CACNG3;NMUR2;NALCN;CCL4L1;ANK2;RCVRN;CACNA1A;HTR2A;CATSPER1
negative regulation of serine-type endopeptidase activity	1	0.0164298	ANXA8	proteolysis involved in cellular protein catabolic process	112	5.55164e-07	RNF139;CDC34;BAG5;FBXW5;GBA;BBS7;CTSV;PSMF1;USP50;GSK3B;TRIM3;RPS7;VPS37A;BIRC6;SYVN1;PSMD8;PCYOX1;PSMD6;RCHY1;ARIH2;RNF4;TRIB1;JKAMP;DNAJB9;BTRC;PSME2;PSMD9;UBE2E1;FBXO45;RNF144B;RBCK1;PSMA7;TMEM67;FOXRED2;HSP90B1;ATXN3;GPX1;CUL2;UBA6;RNF167;ZFAND2B;USP47;PSMB1;MAD2L1;FBXO11;NUDT15;SIAH3;CDC16;CDK1;USP19;UBXN1;PCBP2;ERLIN1;OS9;MAN1B1;RNF126;NEDD4;CDC26;UBE2S;RNF8;BAG6;DCAF11;IDE;RNF168;DDRGK1;SU…	lytic vacuole	6	0.0149972	NAPRT;FMOD;ARSA;CTSK;LYZ;CTSW	response to xenobiotic stimulus	44	0.00398838	CYP2C8;CHRNB2;CYP2B6;S100A12;CYP2C19;HTR2A;GRIN2A;OR56A5;LPO;TIAM1;OPRM1;CES1;RYR1;ADCY8;SOD1;CYP2C18;NAT2;SLC6A1;CYP2F1;NQO2;CRH;RYR3;ACSL1;CYP3A4;CYP2C9;GPX1;SLC6A3;GBA;HSPD1;METTL21C;CYP2A13;CNR1;SMPD1;TACR3;RYR2;PDE2A;SLC18A2;RGS10;GLYAT;HSPA5;TGFB1;CALM1;CRYZ;DBH	DNA metabolic process	186	6.56772e-07	ERCC2;FANCA;NT5M;GAR1;UBE2A;TOM1L1;TERF2;POT1;PPIA;ALKBH5;CDC34;NEIL2;CDADC1;TRIM25;FIGNL1;RLF;ASF1A;UVSSA;OTUD4;MPHOSPH8;POLI;CHEK2;USP47;HMGN1;RFC3;NONO;ERCC5;RNASEH1;HSP90AA1;NUDT16L1;NCOA6;RBBP4;H2AFX;NUDT16;EXOSC6;STAG2;PAXIP1;USP45;HNRNPD;CASP3;DTD1;FANCG;CCNH;NABP1;ERCC3;RBM14-RBM4;MMS19;KRBA2;DDX1;CLSPN;WDR48;TMEM189-UBE2V1;PARP2;TK2;POLR2L;APAF1;XRCC3;ACD;PPARG;RAD9B;APBB1;CHRAC1;RRM1;NP…	Calcium signaling pathway	16	0.00828001	RYR3;LHCGR;GRIN2A;ADCY8;PDE1C;PRKCB;HTR5A;TNNC1;GRM5;DRD5;P2RX3;ATP2B2;TRHR;CACNA1A;HTR2A;HRH2
negative regulation of serine-type peptidase activity	1	0.0164298	ANXA8	cell cycle process	186	6.14947e-07	EPS8;PEBP1;CDC34;DHFR;IK;FBXW5;ARF1;HNRNPU;CNOT6;KPNB1;EIF4G2;BIRC6;ORC1;PHC3;EZH2;TTN;POLE4;CKS2;TTK;MCM6;RNF4;RFC5;AURKAIP1;NAE1;CCP110;SPC25;CCNI;JTB;TTC19;HRAS;PIDD1;BTRC;PSME2;PLAGL1;BUB1;GEN1;UBE2E1;NSUN2;ERCC2;PRKAB1;ZNF207;NTMT1;TUBB;STAMBP;NIPBL;TDRD9;MEPCE;TMEM67;CLSPN;YWHAG;JADE1;PSMG2;MEN1;TAS1R2;TOP2A;CDK2AP2;CUL2;KLHDC3;MCMBP;IGF2;USP47;APAF1;RPS3;PCGF6;MAD2L1;STOX1;SDE2;KIF18A;CDC1…	positive chemotaxis	2	0.0159018	F3;ITGA2	positive regulation of response to external stimulus	45	0.00488136	FGF2;PDGFD;S100A12;NTF3;CCL4L1;CCL3;TLR2;CCL18;NLRP10;CMKLR1;HMGB1;TIAM1;OPRM1;CCL7;TSLP;IL21;S100A9;S100A8;TNFSF14;TRIM15;HRG;NTRK3;DSCAM;PLG;CDH13;NPY5R;DDT;HSPD1;CCL1;CNR1;BTK;MAPK14;FGF10;CALR;S100A7;PDE2A;IL16;CASR;SCG2;IL15;WNK1;IL17F;TGFB1;VAMP8;C5AR1	adenyl ribonucleotide binding	271	7.00374e-07	KIF27;ADK;ACTR3;ERCC2;EIF2AK2;N4BP2;CDC42BPA;MAP3K8;BBS12;VRK2;UCKL1;NEK9;UBE2A;CDK17;CTPS2;NME4;CBWD2;TTL;BUB1;CDC34;WNK4;FIGNL1;PMVK;TTK;LANCL2;ATP1B1;P2RX2;LARS2;WEE1;ABCD4;MAST2;STK16;UBE2L3;CHEK2;TTLL7;STKLD1;DARS;APRT;ETNK1;EPHB4;STK35;PRKD1;P2RX7;HSP90AA1;DDX50;PAPSS2;GALK2;DDR2;ATP6V1B2;ULK2;ABCD3;ASNS;FES;AURKA;ACVR1;DDX24;TGFBR2;ABCB9;EPHA4;CARS;DNAJA2;SIK2;POMK;ADCY3;TXK;RTCB;IDH3G;AAK…	regulation of response to external stimulus	49	0.00878179	JAK2;SCGB1A1;CMA1;FANCD2;S100A14;TLR2;AIPL1;DHX58;TNR;AJAP1;CDH13;A2M;NTRK3;ROBO2;C6;S100A9;OPRM1;PRKCQ;PDGFD;MED1;CCL2;FGA;C7;C1QB;CMKLR1;CFHR5;AIM2;S100A12;PDE6B;LILRB1;UBASH3B;TSLP;CCL7;CCR6;CAPN3;SYK;DDT;CARD8;CCL1;GRK1;RIOK3;NLRP1;CCL4L1;FGB;MAS1;NPY5R;NTF3;NLRP10;TGM2
cerebral cortex GABAergic interneuron development	1	0.0164298	ARX	Ribosome	37	6.8126e-07	RPL21;RPL10;RPLP2;RPL37A;RPL22L1;RPS7;RPL30;RPS15A;RPS3A;MRPL28;RPL35;RPS8;RPL8;RPLP1;RPS14;RPL6;RPL37;RPL31;MRPL9;RPS11;RPS3;MRPL24;RPS15;MRPL1;FAU;RPL13;RPSA;MRPS21;RPLP0;MRPS10;RPS2;RPS12;RPL22;RPL18A;RPL10A;RPL4;RPS16	appendage development	3	0.0162026	HOXA10;BAK1;SOX9	extrinsic component of synaptic membrane	5	0.00509568	CTNNA2;SCRIB;PHB;TIAM1;DGKI	carbohydrate derivative biosynthetic process	143	9.87988e-07	ADK;ADAL;ATIC;PRPSAP2;ALDOA;SLC35C1;UCKL1;MGAT4C;CTPS2;NME4;TSTA3;HS2ST1;ALG12;B3GNT5;GLCE;HDDC2;CDADC1;SLC35B3;C1GALT1C1;NME9;PMM1;CHSY3;SLC25A1;MGAT4A;UGDH;XYLT2;B4GALT3;APRT;PLCB1;DCTD;ALG13;PLOD2;P2RX7;PAPSS2;G6PD;EXTL3;B4GALT6;B3GNT4;B3GNT9;ENO3;DLAT;POMK;DHDDS;ADCY3;MPI;FMOD;PGK1;ST3GAL3;HS6ST3;PPARA;ALG2;UGGT1;UCK1;EXT2;ENO2;PDK1;DPM1;PLOD1;TK2;CHST13;ITM2B;GALNT5;MPPE1;GAPDH;PPCS;RRM1;GMD…	transmembrane transport	86	0.00892319	SLC35A5;ALG10B;CATSPER2;TRPC5;SLC5A2;KCNK9;RYR3;GABRE;GRIN2B;SLC6A2;DPP6;PIEZO2;OTOP1;KCNB2;GRIN2A;SLC14A2;SLC26A5;SLC1A6;KCNA1;ASIC2;SCN4A;GRIK3;DPP10;KCNT2;PRKCB;YES1;OPRM1;LRRC8E;TMEM38A;ASIC5;SLC2A7;KCNK18;GRM5;KCNQ3;BHLHA15;CNGA2;GABRB1;ABCC12;SLC2A9;CLCN6;ABCA13;CACNG2;COX7B2;METTL21C;GLRA1;KCNA4;P2RX3;KCNIP4;JPH3;KCNT1;CNGB3;MRPL18;UBASH3B;KCNV1;GABRA6;TERT;SLCO3A1;CAPN3;ATP2B2;FGF14;CACNG…
positive regulation of cell proliferation involved in kidney development	1	0.0164298	SERPINB7	RNA splicing	76	7.00118e-07	CCAR1;RBM15B;SRSF11;IK;DHX16;HNRNPA0;SF3B3;HNRNPU;U2AF2;CLK2;HNRNPUL1;RBM5;SRSF3;SMNDC1;MAGOH;HNRNPF;RBM39;TXNL4A;PTBP1;RBM3;SF1;PRPF6;NUDT21;SCAF11;SNRNP200;YBX1;RTCB;IWS1;POLR2J;HNRNPC;THOC3;SNRPG;PNN;TSEN34;POLR2I;RBM11;RBFOX3;PRPF4B;HSPA8;KHSRP;DDX5;BUD13;PCBP2;SNRPB;TSEN2;CPSF3;PPP4R2;GEMIN8;HNRNPA3;DDX17;PUF60;RBM28;LUC7L;RBM15;SNRPD3;NCBP2L;ZNF638;SUPT6H;SF3B1;TRA2A;PRPF3;SREK1;TMBIM6;PRPF…	limb development	3	0.0162026	HOXA10;BAK1;SOX9	intrinsic component of postsynaptic specialization membrane	16	0.0051033	CHRNB2;GRIK5;DCC;CACNG3;PTPRO;GRIN2A;GLRA1;CACNG2;CHRM3;GRID1;LRRC4B;HTR5A;GABRA3;SORCS3;KCND3;EFNB3	Ubiquitin mediated proteolysis	40	1.64418e-06	XIAP;UBE2A;CDC34;UBE2L3;ITCH;NEDD4;PPIL2;MID1;KEAP1;UBE2F;CBLC;UBE2I;FBXO2;UBE2K;MDM2;BIRC6;HERC3;UBA6;ANAPC4;RCHY1;VHL;HUWE1;FBXW11;UBE2Q1;UBE2E1;HERC1;KLHL13;BIRC2;CDC26;FBXO4;UBE2C;FANCL;BTRC;UBE2D2;ANAPC7;ANAPC5;UBE3A;CBL;RNF7;UBE2Z	epoxygenase P450 pathway	4	0.00904472	CYP2C8;CYP2B6;CYP2C9;CYP2C19
positive regulation of natural killer cell mediated immune response to tumor cell	1	0.0164298	CD226	cellular response to DNA damage stimulus	127	8.83206e-07	MUTYH;ATRIP;CCNH;MAPK1;TLK1;CNOT6;CHAF1A;NUDT16L1;RCHY1;GPS1;XIAP;RFC5;ACTR5;HTRA2;PIDD1;PLAGL1;TIPRL;GEN1;ERCC2;UVSSA;FBXO45;NIPBL;CLSPN;BAD;APTX;MEN1;POLR2J;ATXN3;COPS6;TOP2A;NEK4;WAS;USP47;IRF7;RPS3;HMGB1;TDP1;POLR2I;CBX1;COPS5;CDK9;CEBPG;FANCB;DDX5;CDK1;POLG2;RAD17;APEX1;ANKRD1;CHEK2;MAPK14;NEDD4;POLI;RNF8;BAG6;RNF168;MEIOB;CCNK;FANCG;PPP4R2;NABP2;GINS2;DDIT3;APLF;MRPS26;PCNA;MOAP1;ERCC6;C9or…	regulation of cartilage development	2	0.0163753	CTSK;SOX9	synapse part	120	0.00510659	CHRNB2;SLC22A2;WNT7A;BSN;GRIK5;RPH3A;CTNNA2;SCRIB;GRIN2B;MCTP2;USH2A;NTF3;KCNA1;HTR2A;GRM6;BCL11A;SLC8A3;DCC;CACNG3;PTPRO;GABRR2;VAMP3;GRIN2A;KCNH1;APBA3;PRKCB;ATP2B2;DLGAP3;GLRA1;CACNG2;MAGI2;FCGR2B;PHB;SYPL2;GABRB1;CADM3;SYT11;TMEM108;SCN10A;GABRE;TIAM1;CDH8;OPRM1;CHRM3;AP3D1;ANK2;GABRB3;GABRP;ADCY8;RPL6;GLRA3;LIN7C;CHRNA4;GRID1;NGF;SLC6A1;DGKI;GABBR2;LRRC4B;RPL14;NTRK3;SLC17A6;SYT8;PSD;SLC1A6;…	nucleobase-containing small molecule metabolic process	145	1.86578e-06	HINT1;ADK;NUDT13;ADAL;ATIC;COX7C;PRPSAP2;ALDOA;NT5M;APIP;UCKL1;GPD2;CTPS2;NME4;TSTA3;HDDC2;NEIL2;CDADC1;FIGNL1;PMVK;SLC35B3;NME9;NDUFAF1;ATP1B1;PMM1;SLC25A1;UGDH;APRT;DCTD;SDHC;NDUFS4;P2RX7;PAPSS2;G6PD;NUDT16;ATP6V1B2;AADAT;ENO3;DLAT;ADCY3;MFN1;MPI;ENTPD4;BST1;NUDT11;PGK1;PPARA;NNT;PNP;GMPR2;UGGT1;MTHFD2L;UCK1;NT5C1B-RDH14;ENO2;PDK1;KARS;GLRX;TK2;AK7;GAPDH;PPCS;RRM1;GMDS;RNLS;PRPS1;ZBTB20;FHIT;PD…	cellular potassium ion transport	17	0.00954722	ALG10B;KCNK9;DPP6;KCNB2;KCNA1;DPP10;KCNT2;TMEM38A;KCNK18;KCNQ3;KCNA4;KCNIP4;KCNT1;KCNV1;NALCN;ANK2;KCNQ2
positive regulation of natural killer cell mediated cytotoxicity directed against tumor cell target	1	0.0164298	CD226	establishment of protein localization to membrane	61	8.94519e-07	SRP14;SCRIB;RPL21;RPL10;RPLP2;RPL37A;YWHAB;SRP9;RPS7;PEX26;RPL30;LYPLA1;RPS15A;RPS3A;UBL4A;HRAS;RPL35;RPS8;RPL8;RPLP1;RPS14;PEX19;YWHAZ;RPL6;RPL37;BAD;YWHAG;RPL31;RPS11;ZFAND2B;RAB26;KCNE1;RPS3;GGA3;RPS15;ICMT;ZDHHC14;BAG6;CNST;RPL13;GRIPAP1;RPSA;MOAP1;YWHAH;BBS2;VAMP3;ATG4C;RPLP0;RPS2;ANK3;RPS12;RPL22;RPL18A;GDI1;ASNA1;RPL10A;FIS1;RPL4;NPC1;RPS16;GRIN3B	nuclear receptor transcription coactivator activity	2	0.0168548	ACTN1;SS18	ion homeostasis	103	0.00532462	FGF2;GRIN2B;KCNA1;HTR2A;FPR1;CCL3;GRINA;SLC8A3;CXCR1;FTL;GRIN2A;SCN5A;FGF23;ADRA1B;PRKCB;TRPC4;ATP2B2;CMKLR1;ADCYAP1R1;HCRTR2;FPR3;CSRP3;SYPL2;GPR32;PDE6B;SCN10A;FAM155A;SLC4A8;HMGB1;TRDN;CCL7;SLC24A1;RYR1;AP3D1;NMUR2;ANK2;CCL8;ADCY8;CCL11;PLCG2;CCKBR;DCN;S100A9;FTMT;SOD1;TRPC7;TRPC3;SLC24A5;HEPH;CYP11B2;BDKRB1;ATP13A5;CACNA1A;S100A8;ATP6V1H;CRH;XCR1;TMEM64;RAB38;RYR3;SLC11A2;TRPM2;GNA15;HCN4;NR1…	small molecule metabolic process	337	2.0495e-06	DHRS4;HINT1;ADK;NUDT13;ADAL;ATIC;COX7C;DHDH;MTR;LPL;FN3K;PRPSAP2;ALDOA;NT5M;PTS;SLC35B4;APIP;COX11;UCKL1;DHRS3;FAHD1;GPD2;CTPS2;NME4;TSTA3;DDAH1;TXN2;OXCT1;GLCE;HDDC2;NEIL2;CDADC1;FIGNL1;PMVK;SLC35B3;NME9;NDUFAF1;PCYOX1;ATP1B1;MIDN;PMM1;LARS2;NFYB;ABCD4;CHSY3;SLC25A1;PEX7;UGDH;XYLT2;B4GALT3;DARS;APRT;ERLIN2;PLCB1;DCTD;CYP2R1;SDHC;APOL2;SLC35A2;NDUFS4;CD320;PLOD2;P2RX7;PAPSS2;G6PD;PLCG1;OCRL;GALK2…	regulation of calcium-mediated signaling	10	0.0100389	NRG1;CDH13;CIB1;CMKLR1;P2RX3;JPH3;SYK;TREM2;CCL4L1;C10orf71
positive regulation of transforming growth factor beta1 production	1	0.0164298	SERPINB7	ribonucleoprotein complex subunit organization	51	9.19547e-07	EIF5;RPL10;BOP1;EIF3B;ATXN2L;CNOT6;RBM5;TXNL4A;DICER1;SF1;PRPF6;NUDT21;SCAF11;MPV17L2;SNRNP200;RPS14;LSM14A;RPL6;ABT1;SNRPG;RPS15;EIF3L;ATXN2;SNRPB;EIF4B;DHX30;PTGES3;GEMIN8;RPSA;EIF2A;MTERF3;RPF2;LUC7L;CNOT1;SNRPD3;ZNHIT6;SBDS;RPLP0;SHQ1;EIF3E;PPAN;EIF3A;SF3B1;PUM2;NPM1;PRPF3;PRPF19;EIF3J;EIF2S3;CLNS1A;SF3A2	regulation of dendritic spine development	2	0.0173403	ARHGAP33;CUX2	detection of biotic stimulus	7	0.0053983	NLRC4;TLR2;PGLYRP3;CRTAM;PGLYRP4;CD1D;TLR1	nucleobase-containing small molecule biosynthetic process	49	2.33524e-06	HINT1;ADK;ADAL;ALDOA;NT5M;UCKL1;CTPS2;NME4;NEIL2;NME9;APRT;P2RX7;NUDT16;ENO3;ENTPD4;NUDT11;PGK1;PPARA;PNP;UCK1;NT5C1B-RDH14;ENO2;TK2;GAPDH;ZBTB20;PDE8B;SLC25A12;NME1;EIF6;ACAT1;ENO4;PDE7B;GALK1;PRKAG2;PGAM1;TK1;CDA;GUK1;UPP1;ADPGK;HDAC4;PFKFB1;SMPDL3A;FBP1;NEIL1;ENO1;NUDT10;INSR;ECD	inorganic cation transmembrane transport	46	0.0104517	ALG10B;CATSPER2;TRPC5;KCNK9;RYR3;GRIN2B;DPP6;OTOP1;KCNB2;GRIN2A;KCNA1;ASIC2;SCN4A;DPP10;KCNT2;OPRM1;TMEM38A;ASIC5;KCNK18;KCNQ3;BHLHA15;SLC2A9;CACNG2;COX7B2;METTL21C;KCNA4;KCNIP4;JPH3;KCNT1;UBASH3B;KCNV1;CAPN3;ATP2B2;FGF14;CACNG3;PM20D1;COX8C;NALCN;SCN5A;SCN11A;ANK2;KCNQ2;CACNA1A;SLC2A8;HTR2A;CATSPER1
mitochondrial ribosome assembly	1	0.0164298	FASTKD2	mitotic cell cycle	142	1.02774e-06	EPS8;PEBP1;SCRIB;CDC34;DHFR;IK;FBXW5;ARF1;HNRNPU;CNOT6;KPNB1;ORC1;EZH2;TTN;POLE4;CKS2;AZI2;TTK;MCM6;AURKAIP1;NAE1;CCP110;ANGEL2;SPC25;CCNI;JTB;TTC19;HRAS;PIDD1;BTRC;PSME2;PLAGL1;BUB1;GEN1;UBE2E1;ERCC2;ZNF207;TUBB;STAMBP;NIPBL;MEPCE;CLSPN;YWHAG;FOXA1;JADE1;PSMG2;MEN1;PPP2R2B;TOP2A;NEK4;CDK2AP2;CUL2;IGF2;USP47;MAD2L1;STOX1;KIF18A;NUDT15;CDC16;CDK9;CENPJ;CDK1;SDCCAG8;PRC1;RAD17;BORA;APEX1;CLTC;WEE1;…	collagen binding	2	0.0173403	CTSK;ITGA2	modulation of chemical synaptic transmission	60	0.00551707	CHRNB2;WNT7A;GRIK5;GRIN2B;NTF3;HTR2A;GRM6;ADIPOQ;HRH2;SLC8A3;DCC;CACNG3;GRIN2A;PRKCB;SYBU;CACNG2;SYT11;TMEM108;EPHB1;SLC24A1;ADCY8;CHRNA4;GRID1;NGF;SLC6A1;DGKI;CACNA1A;CRH;HRAS;FGF14;GRIK3;NPS;ARF1;GIP;NPY5R;GSK3B;SNCAIP;CNR1;CX3CR1;CDH11;HRH1;SNAP25;SORCS3;BRSK1;CACNA1B;MAPK1;STXBP1;JPH3;TOR1A;TNR;WNT3A;P2RX3;RAB26;SHANK1;SLC24A2;NPTX2;NPTX1;EFNB3;YWHAH;CALM1	chromosome	190	2.42441e-06	DYNLT3;ACTR3;PHF12;BRD9;PWP1;PHF10;GAR1;ETV3;SMARCD2;UBE2A;TERF2;ICE2;POT1;BUB1;ARPC5;FIGNL1;TTK;BIRC5;TTI2;ASF1A;UVSSA;MAGED1;ZNF207;MPHOSPH8;THOC3;CHEK2;HMGN1;H3F3A;RFC3;STAG3;ARID1A;PLCB1;USP11;FMR1;ERCC5;CHMP7;MXD1;ITGB3BP;RBBP4;H2AFX;SATB1;MLLT3;SEH1L;AURKA;CENPU;HMGN2;NCAPG2;STAG2;PAXIP1;NEDD4;CHAMP1;NDE1;ZWINT;THRB;DCTN5;NABP1;DYNLL1;SPC25;SMAD2;HP1BP3;SMARCD1;UBE2I;PRR14;XRCC3;ACD;PURB;RA…	transmitter-gated ion channel activity involved in regulation of postsynaptic membrane potential	6	0.0105015	GABRE;GABRB1;GLRA1;GABRA6;GABRA4;GRIK5
type 1 angiotensin receptor binding	1	0.0164298	JAK2	mRNA catabolic process	60	1.11234e-06	RPL21;HNRNPA0;RPL10;RPLP2;RPL37A;TIRAP;YWHAB;HNRNPU;CNOT6;RPS7;RPL30;RPS15A;RPS3A;MAGOH;UPF2;ANGEL2;PNRC2;RPL35;RPS8;RPL8;RPLP1;RPS14;ZC3H14;YBX1;YWHAZ;RPL6;RPL37;HNRNPC;RPL31;RPS11;SAMD4A;RPS3;RPS15;HSPA8;APOBEC1;KHSRP;DDX5;APEX1;MTPAP;MAPK14;RPL13;RPSA;SLFN14;CNOT1;SMG5;RPLP0;RPS2;XPO1;EIF3E;RPS12;YTHDF2;EXOSC7;PUM2;NPM1;RPL22;RPL18A;METTL14;RPL10A;RPL4;RPS16	protein targeting to peroxisome	2	0.0178317	NUDT7;ACOT2	positive regulation of calcineurin-mediated signaling	6	0.00561682	C10orf71;CHP2;CAMTA1;NRG1;PTBP1;LMCD1	RNA binding	282	2.43184e-06	ADK;MIF4GD;MRPL28;GTF3A;MTO1;UBTF;EIF2AK2;MRPL44;EIF2S2;RPL13;NSUN2;ALDOA;MRPS18A;SECISBP2L;GAR1;FAM120C;RPL10;GFM2;PPIA;RBM41;PFN1;LRRFIP1;ALKBH5;EIF4G3;SOX9;HNRNPA0;EIF2S3;ANGEL2;MAK16;TRIM25;IGF2BP2;FYTTD1;PRPF40B;UPF3A;SLC3A2;IMMT;OTUD4;ZNF207;THOC3;MEX3D;SRP9;EIF1;UBE2L3;ADAR;DARS;RPL28;ALG13;FMR1;TNRC6A;NONO;NCL;DROSHA;CPSF2;RNASEH1;HSP90AA1;AHNAK;DDX50;EIF2B3;NUPL2;NUDT16L1;EIF5;ATXN2L;SNR…	cellular ion homeostasis	41	0.0108641	JAK2;HEPH;TRPC5;FGF23;RYR3;GPR32;GRIN2B;FTHL17;CCL13;GRIN2A;ADCYAP1R1;ADCY8;PRKCB;S100A9;CXCR6;GRM5;C7;DRD5;RAB38;OCM;CMKLR1;METTL21C;PDE6B;HRH4;P2RX3;JPH3;UBASH3B;CCL7;CCR6;CAPN3;ATP2B2;CCL1;NMUR2;ANK2;CCDC115;CACNA1A;ATP13A5;GDF2;HTR2A;TGM2;CCL11
myristoyl-CoA hydrolase activity	1	0.0164298	ACOT2	regulation of cell cycle phase transition	71	1.1397e-06	IK;CNOT6;ORC1;EZH2;TTK;NAE1;CCP110;PIDD1;BTRC;PSME2;PLAGL1;BUB1;GEN1;UBE2E1;ERCC2;ZNF207;TUBB;MEPCE;CLSPN;YWHAG;JADE1;PSMG2;MEN1;CDK2AP2;USP47;MAD2L1;STOX1;CDC16;CENPJ;CDK1;SDCCAG8;RAD17;APEX1;WEE1;CHEK2;DYNLL1;ANLN;CDC26;TUBB4B;TMOD3;DDRGK1;RDX;ZNF16;ANAPC4;PCNA;DCTN3;CCND1;KMT2E;CNOT1;FBXO5;CDK5RAP3;UBE2C;BABAM1;HAUS2;MAD2L2;DLGAP5;RAD51C;CEP192;NPM1;CSNK1D;CDKN1B;CNTRL;CUL4B;PLCB1;UIMC1;LSM11;…	protein localization to peroxisome	2	0.0178317	NUDT7;ACOT2	regulation of trans-synaptic signaling	60	0.00580939	CHRNB2;WNT7A;GRIK5;GRIN2B;NTF3;HTR2A;GRM6;ADIPOQ;HRH2;SLC8A3;DCC;CACNG3;GRIN2A;PRKCB;SYBU;CACNG2;SYT11;TMEM108;EPHB1;SLC24A1;ADCY8;CHRNA4;GRID1;NGF;SLC6A1;DGKI;CACNA1A;CRH;HRAS;FGF14;GRIK3;NPS;ARF1;GIP;NPY5R;GSK3B;SNCAIP;CNR1;CX3CR1;CDH11;HRH1;SNAP25;SORCS3;BRSK1;CACNA1B;MAPK1;STXBP1;JPH3;TOR1A;TNR;WNT3A;P2RX3;RAB26;SHANK1;SLC24A2;NPTX2;NPTX1;EFNB3;YWHAH;CALM1	nucleolus	178	2.4357e-06	MIF4GD;SERTAD3;UBTF;ZFY;CRIPT;ZNF554;TSEN34;PWP1;RPL13;NSUN2;SPRN;GAR1;SPATA2;WDR55;TXN2;MAK16;AKAP11;UPF3A;MIDN;ZNF207;WEE1;MPHOSPH8;GZF1;LRRC34;ADAR;PAFAH1B2;N4BP1;DNAJB9;GPATCH2;FMR1;ETV6;NONO;STK35;NCL;DROSHA;DDX50;SLC29A2;DDRGK1;NUDT16;MAP2;PRDM5;EXOSC6;DDX24;TEX10;B3GNT9;DTD1;FANCG;SPATS2L;IDH3G;EIF3A;CSTB;RBM14-RBM4;HIRIP3;LARP4B;RPF1;KIF20B;CIRBP;MTUS1;PDK1;ETV4;PARP2;TRAF7;POLR2L;SURF6;U…	synaptic transmission, GABAergic	6	0.014568	GABRE;NPAS4;GABRA6;GABRA4;NPS;NPY5R
Azathioprine	1	0.0164298	GSTA1	translation initiation factor activity	18	1.23905e-06	EIF5;EIF2S2;EIF3B;EIF4A1;EIF4G2;EIF2B1;EIF2B4;EIF1AX;COPS5;EIF3L;EIF4B;EIF2A;EIF2B2;EIF3E;EIF3A;EIF3J;EIF2S3;EIF1	establishment of protein localization to peroxisome	2	0.0178317	NUDT7;ACOT2	positive regulation of calcium ion transport	21	0.0059055	CCL4L1;GRM6;CCL3;ADCYAP1R1;FFAR1;TRDN;ANK2;PLCG2;TRPC3;BDKRB1;CRH;CCL2;FGF14;KCNE2;TRPC6;STAC;CEMIP;RYR2;P2RX3;CASR;CALM1	purine nucleotide binding	322	2.46325e-06	KIF27;ADK;ACTR3;ERCC2;EIF2AK2;N4BP2;CDC42BPA;MAP3K8;BBS12;VRK2;ST13;UCKL1;GFM2;NEK9;UBE2A;CDK17;PFN1;CTPS2;NME4;CBWD2;TTL;BUB1;CDC34;EIF2S3;TUBB;WNK4;FIGNL1;PMVK;TTK;LANCL2;ATP1B1;P2RX2;LARS2;WEE1;ABCD4;MAST2;STK16;UBE2L3;CHEK2;TTLL7;STKLD1;DARS;APRT;ETNK1;EPHB4;STK35;MFN2;PRKD1;P2RX7;HSP90AA1;DDX50;PAPSS2;EIF5;GALK2;DDR2;NUDT16;ATP6V1B2;ULK2;ABCD3;ASNS;FES;DRG1;AURKA;RAB2A;RAB36;ACVR1;DDX24;TGFB…	neurotransmitter receptor activity involved in regulation of postsynaptic membrane potential	6	0.014568	GABRE;GABRB1;GLRA1;GABRA6;GABRA4;GRIK5
Tofacitinib	1	0.0164298	JAK2	proteasomal protein catabolic process	79	1.7833e-06	RNF139;CDC34;BAG5;FBXW5;GBA;BBS7;PSMF1;GSK3B;TRIM3;SYVN1;PSMD8;PSMD6;RCHY1;ARIH2;RNF4;TRIB1;JKAMP;DNAJB9;BTRC;PSME2;UBE2E1;FBXO45;RNF144B;RBCK1;PSMA7;TMEM67;FOXRED2;HSP90B1;ATXN3;GPX1;ZFAND2B;PSMB1;MAD2L1;NUDT15;SIAH3;CDC16;CDK1;USP19;UBXN1;PCBP2;ERLIN1;OS9;MAN1B1;RNF126;NEDD4;CDC26;UBE2S;BAG6;DCAF11;DDRGK1;SUMO2;DDIT3;RNF19B;ANAPC4;ANKZF1;PSMB6;SDF2L1;PSMD7;PSMB4;UBXN4;ERCC8;FBXO5;UBE2C;SEC13;AT…	response to heparin	1	0.0179152	SOX9	ligand-gated cation channel activity	20	0.00598046	CHRNB2;GRIK5;GRIN2B;GRIN2A;RYR1;CHRNA4;CNGA2;RYR3;TRPM2;GRIK3;KCNE2;HCN4;KCNA10;CNGA4;CNGB3;RYR2;JPH3;HTR3E;P2RX3;HCN1	chromatin binding	109	2.5764e-06	UBTF;SMARCD2;KDM5B;SOX9;PATZ1;ASF1A;FOXO3;HMGN1;H3F3A;STAG3;ARID1A;FMR1;NONO;NCOA6;RBBP4;SATB1;MLLT3;MSL1;PRDM5;PHF23;HMGN2;STAG2;ADNP;HNRNPD;MLLT10;THRB;SMAD2;TSHZ1;DDX1;THRA;HP1BP3;RNF4;SMARCD1;PPARG;PBRM1;APBB1;DMRT1;NPM2;UHRF1;NCOA2;JUN;BRD2;TOX3;SNAI2;GTF2H1;ATRX;USP51;FOXO1;SAFB;RIT2;RNF168;PRDM1;TOP1;BCL6;MCMBP;CHAF1B;PLAC8;SIRT7;EBF2;HDAC7;MEF2A;MBD3;SIN3A;STAT5B;MSH6;HNRNPU;KLHDC3;MSGN1;…	adenylate cyclase-inhibiting G protein-coupled receptor signaling pathway	9	0.0147198	ADCY8;GRM6;GRIK3;HTR5A;OPRM1;HTR1E;HRH4;MARCO;OR56A5
positive regulation of cytokine production	4	0.016765	JAK2;LURAP1;SERPINB7;CD226	RNA catabolic process	64	1.88208e-06	SLIRP;RPL21;HNRNPA0;RPL10;RPLP2;RPL37A;TIRAP;YWHAB;HNRNPU;CNOT6;RPS7;RPL30;RPS15A;RPS3A;MAGOH;UPF2;ANGEL2;PNRC2;RPL35;RPS8;RPL8;RPLP1;RPS14;ZC3H14;YBX1;YWHAZ;RPL6;RPL37;HNRNPC;RPL31;RPS11;SAMD4A;RPS3;RPS15;HSPA8;APOBEC1;KHSRP;DDX5;APEX1;MTPAP;MAPK14;RPL13;RNASET2;RPSA;LRPPRC;SLFN14;CNOT1;SMG5;RPLP0;RPS2;XPO1;EIF3E;RPS12;YTHDF2;EXOSC7;PUM2;NPM1;RPL22;RPL18A;METTL14;RPL10A;RPL4;RPS16;ZPR1	cellular response to magnesium ion	1	0.0179152	FBP1	cellular response to interferon-gamma	29	0.00599657	CCL4L1;IRF8;CCL3;TLR2;HLA-DQA2;CCL18;VAMP3;HLA-DPA1;HLA-DPB1;CCL7;SYNCRIP;OTOP1;CCL8;CCL11;HLA-DQA1;HLA-F;CCL2;CASP1;IRGM;CCL1;CCL13;CCL17;NCAM1;STXBP1;IRF9;IRF7;TRIM21;HLA-DRA;TRIM31	carbohydrate derivative metabolic process	215	2.93311e-06	HINT1;ADK;ADAL;ATIC;COX7C;FN3K;PRPSAP2;ALDOA;SLC35C1;NT5M;RNF139;APIP;UCKL1;MGAT4C;GPD2;CTPS2;NME4;TSTA3;HS2ST1;ALG12;B3GNT5;GLCE;HDDC2;NEIL2;CDADC1;FIGNL1;PMVK;SLC35B3;C1GALT1C1;NME9;NDUFAF1;ATP1B1;PMM1;CHSY3;SLC25A1;MGAT4A;RNF103;UGDH;XYLT2;B4GALT3;APRT;PLCB1;DCTD;ALG13;ENGASE;SDHC;NDUFS4;PLOD2;P2RX7;PAPSS2;G6PD;EXTL3;NUDT16;ATP6V1B2;B4GALT6;B3GNT4;AADAT;HEXB;AKR7A2;CREM;B3GNT9;ENO3;DLAT;POMK;D…	chloride transmembrane transport	9	0.0147198	GABRE;SLC26A5;GABRB1;CLCN6;GLRA1;GABRA6;GABRA4;CLCN7;GABRP
antioxidant activity	2	0.0168334	GSTA1;HBZ	cell cycle phase transition	89	2.20439e-06	EPS8;CDC34;DHFR;IK;CNOT6;ORC1;EZH2;POLE4;CKS2;TTK;MCM6;NAE1;CCP110;PIDD1;BTRC;PSME2;PLAGL1;BUB1;GEN1;UBE2E1;ERCC2;ZNF207;TUBB;MEPCE;CLSPN;YWHAG;JADE1;PSMG2;MEN1;CDK2AP2;CUL2;USP47;MAD2L1;STOX1;CDC16;CENPJ;CDK1;SDCCAG8;RAD17;BORA;APEX1;WEE1;CHEK2;DYNLL1;ANLN;CDKN2C;CHMP2A;CDC26;UBE2S;TUBB4B;TMOD3;DDRGK1;RDX;ZNF16;UBE2L3;ANAPC4;PCNA;DCTN3;CCND1;TACC3;KMT2E;CNOT1;FBXO5;CDK5RAP3;UBE2C;DBF4;BABAM1;HAU…	post-embryonic eye morphogenesis	1	0.0179152	BAK1	release of sequestered calcium ion into cytosol by sarcoplasmic reticulum	8	0.00619786	CCL3;TRDN;RYR1;ANK2;DHRS7C;METTL21C;RYR2;CALM1	transcription coregulator activity	114	2.93825e-06	MED31;JADE1;PHF12;TLE1;SMARCD2;KDM5B;TAF6L;SOX4;BATF3;MAGED1;UBE2L3;BCL9;BHLHE40;CBFB;ARID1A;MXD1;NCOA6;RCOR2;DDIT3;CCAR1;DR1;HSBP1;GMEB1;TAF10;HOXC6;THRB;PPARA;RBM14-RBM4;MMS19;DDX1;THRA;RNF4;SMARCD1;TBL1XR1;PPARG;LPXN;MED10;KLF7;GMEB2;PHF2;NR1I2;RCOR3;NCOA2;ATXN7L3;JUN;PRPF6;NFE2L3;TCF20;SUB1;IL31RA;MED13L;DNAJB1;JMY;HOMEZ;JUND;HDAC7;MEF2A;ESR2;TAF4;SP4;SIN3A;ANKRD1;RFXAP;HES1;PTPN14;MYOCD;ABT1…	delayed rectifier potassium channel activity	5	0.014924	KCNB2;KCNA1;KCNQ3;KCNA4;KCNQ2
negative regulation of endopeptidase activity	3	0.0175804	SERPINB7;SERPINB3;ANXA8	large ribosomal subunit	30	2.51101e-06	RPL21;RPL10;RPLP2;RPL37A;RPL22L1;RPL30;MRPL28;MRPL37;RBM3;RPL35;RPL8;RPLP1;MPV17L2;RPL6;RPL37;RPL31;MRPL9;MRPL51;MRPL24;MRPL1;RPL13;MRPL38;RPLP0;MRPL52;MRPL46;RPL22;NDUFAB1;RPL18A;RPL10A;RPL4	regulation of branching involved in lung morphogenesis	1	0.0179152	SOX9	calcium activated cation channel activity	8	0.00619786	KCNK18;TMEM63C;KCNN1;PKD2L1;CCT8L2;MTMR6;CATSPER1;KCNU1	regulation of cellular catabolic process	149	3.34208e-06	BBS7;RNF217;TIRAP;RNF139;TBC1D25;ALKBH5;EIF4G3;TRIM8;HNRNPA0;ANGEL2;IGF2BP2;MEX3D;PAFAH1B2;N4BP1;FMR1;TNRC6A;MFN2;PRKD1;P2RX7;HSP90AA1;DDRGK1;ITCH;ATP6V1B2;ULK2;PTTG1IP;STYX;AURKA;PHF23;EXOSC6;NEDD4;EPHA4;HNRNPD;SH3D19;CASP3;PPARA;NUP214;AMER1;NNT;GBA;CHFR;CIRBP;PNPLA2;KEAP1;CDK5R1;EXOC1;UBE2K;TRIM21;APAF1;MDM2;ITPR1;FBXL5;EXOC7;GAPDH;YWHAZ;LEPR;BNIP3L;GSK3B;CARHSP1;ATG101;XPO1;ZC3H14;ZBTB20;FHIT…	cellular hormone metabolic process	11	0.0149947	CYP21A2;RETSAT;HSD3B2;CYP11B1;BCO2;MED1;LRAT;HSD17B7;CRABP1;CYP11B2;UGT1A1
activation of cysteine-type endopeptidase activity involved in apoptotic process	2	0.0179844	JAK2;BAK1	transcription-coupled nucleotide-excision repair	22	2.71243e-06	CCNH;GPS1;RFC5;ERCC2;UVSSA;POLR2J;COPS6;POLR2I;COPS5;PCNA;ERCC6;COPS3;ERCC8;RFC4;POLD4;PRPF19;CUL4B;POLR2L;RFC3;GTF2H1;POLD1;ERCC5	positive regulation of cell proliferation involved in heart morphogenesis	1	0.0179152	SOX9	calcium ion transport into cytosol	25	0.00645017	FGF2;GRIN2B;HTR2A;CCL3;SLC8A3;GRIN2A;ADCYAP1R1;FAM155A;TRDN;RYR1;ANK2;PLCG2;TRPC3;BDKRB1;RYR3;TRPM2;DHRS7C;METTL21C;UBASH3B;CEMIP;RYR2;JPH3;P2RX3;TGFB1;CALM1	amide biosynthetic process	149	3.88192e-06	MIF4GD;MRPL28;ATIC;EIF2AK2;MRPL44;MRPL46;EIF2S2;RPL13;MRPS18A;SECISBP2L;RNF139;MRPS10;RPL10;GFM2;EIF4G3;DPH7;EIF2S3;MRPL17;IGF2BP2;SOX4;CNOT10;UPF3A;LARS2;MEX3D;SRP9;SLC25A1;EIF1;FOXO3;B4GALT3;DARS;MRPS25;RPL28;FMR1;TNRC6A;NCL;P2RX7;EIF2B3;DNAJC24;EIF5;ASNS;B4GALT6;EIF4E3;IMPACT;PUS7;LSM14B;MAGOH;CNOT6;CARS;DLAT;HNRNPD;NSMAF;CERS2;RPLP0;EIF3A;CAPRIN2;LARP4B;GBA;RPS27L;DDX1;CIRBP;PDK1;KARS;NCK1;FA…	cation homeostasis	44	0.0153266	JAK2;HEPH;TRPC5;S100A14;RYR3;GPR32;GRIN2B;FTHL17;CCL13;GRIN2A;ADCYAP1R1;KCNA1;ADCY8;PRKCB;S100A9;CXCR6;GRM5;C7;DRD5;RAB38;OCM;CMKLR1;METTL21C;PDE6B;HRH4;CYP11B2;P2RX3;JPH3;UBASH3B;CCL7;CCR6;CAPN3;ATP2B2;CCL1;NMUR2;ANK2;CCDC115;CACNA1A;ATP13A5;GDF2;HTR2A;TGM2;CCL11;SNX5
negative regulation of phospholipase activity	1	0.0187553	ANXA8	RNA splicing, via transesterification reactions	62	3.21162e-06	CCAR1;RBM15B;SRSF11;IK;DHX16;HNRNPA0;SF3B3;HNRNPU;U2AF2;HNRNPUL1;RBM5;SRSF3;SMNDC1;MAGOH;HNRNPF;TXNL4A;PTBP1;RBM3;SF1;PRPF6;NUDT21;SCAF11;SNRNP200;YBX1;POLR2J;HNRNPC;SNRPG;PNN;POLR2I;RBM11;RBFOX3;PRPF4B;HSPA8;KHSRP;DDX5;BUD13;PCBP2;SNRPB;CPSF3;GEMIN8;HNRNPA3;DDX17;PUF60;LUC7L;RBM15;SNRPD3;NCBP2L;SF3B1;TRA2A;PRPF3;SREK1;PRPF19;RBM41;METTL14;FUS;RBM25;POLR2L;SF3B2;CLNS1A;SF3A2;SFPQ;NUP98	intramembranous ossification	1	0.0179152	CTSK	adenylate cyclase-inhibiting G protein-coupled receptor signaling pathway	17	0.0067124	MARCO;GRM6;OR56A5;OPRM1;RXFP2;CHRM3;HTR1E;ADCY8;NPY1R;PSAPL1;GRIK3;HTR5A;GNAL;RIC8A;PDE2A;CASR;PRMT5	transferase complex	149	3.88192e-06	MED31;JADE1;ERCC2;RNF217;PRPSAP2;PHF10;KDM5B;UBE2A;TAF6L;FBXO27;ERC1;FBXL4;BRPF3;KLHL24;PHKA1;UBE2L3;KCTD10;USP47;NAA50;PHKA2;PDCD6;GAN;NCOA6;RBBP4;MSL1;DR1;TAF10;ACVR1;PAXIP1;NEDD4;TEX10;FBXW4;SIK2;DHDDS;CCNH;ERCC3;CUL9;MMS19;KEAP1;MRGBP;DPM1;TMEM189-UBE2V1;CDK5R1;FBXL12;TRAF7;POLR2L;UBE2I;FBXO2;SETD5;TRIM21;ZNF407;FBXL5;MED10;CHRAC1;RTF1;WDFY3;NAA38;CCNY;PRPS1;UBR2;FBXO33;ATXN7L3;ANAPC4;DCUN1D4…	detection of biotic stimulus	4	0.0153506	TLR2;TREM2;CRTAM;PGLYRP3
actin filament network formation	1	0.0187553	ACTN1	regulation of mitotic cell cycle phase transition	65	3.39119e-06	IK;CNOT6;ORC1;EZH2;TTK;NAE1;CCP110;PIDD1;BTRC;PSME2;PLAGL1;BUB1;GEN1;UBE2E1;ERCC2;ZNF207;TUBB;MEPCE;CLSPN;YWHAG;JADE1;PSMG2;CDK2AP2;USP47;MAD2L1;STOX1;CDC16;CENPJ;CDK1;SDCCAG8;RAD17;APEX1;WEE1;CHEK2;DYNLL1;ANLN;CDC26;TUBB4B;TMOD3;RDX;ANAPC4;PCNA;DCTN3;CCND1;KMT2E;CNOT1;FBXO5;CDK5RAP3;UBE2C;HAUS2;MAD2L2;DLGAP5;RAD51C;CEP192;CSNK1D;CDKN1B;CNTRL;CUL4B;PLCB1;LSM11;HMGA2;PRKACA;MAD2L1BP;CEP70;ODF2	direct ossification	1	0.0179152	CTSK	positive regulation of ERK1 and ERK2 cascade	37	0.00674382	FGF2;PDGFD;CCL4L1;MARCO;HTR2A;CCL3;FGA;SLAMF1;CCL18;FGF23;PHB;HMGB1;EPHB1;BMP2;OPRM1;CCL7;FGG;PDGFC;CCL8;CCL11;CCL2;NTRK3;HRAS;FGB;NPY5R;DDT;CCL1;CCL13;ALK;CCL17;FGF10;FGF4;ROS1;S100A7;ARHGAP8;TGFB1;C5AR1	nucleoside diphosphate metabolic process	35	3.93119e-06	ALDOA;NME4;NME9;P2RX7;NUDT16;ENO3;ENTPD4;PGK1;PPARA;ENO2;AK7;GAPDH;ZBTB20;SLC25A12;DLG2;NME1;EIF6;ENO4;CMPK2;BAD;GALK1;PRKAG2;AK4;AK3;PGAM1;GUK1;ADPGK;HDAC4;PFKFB1;FBP1;DTYMK;ENO1;SUCLG1;INSR;ECD	regulation of ion transmembrane transport	30	0.0155241	ALG10B;CATSPER2;DPP6;KCNB2;SLC26A5;KCNA1;ASIC2;SCN4A;DPP10;OPRM1;GRM5;KCNQ3;CACNG2;METTL21C;KCNA4;KCNIP4;JPH3;UBASH3B;KCNV1;CAPN3;FGF14;CACNG3;PM20D1;NALCN;SCN5A;SCN11A;ANK2;KCNQ2;CACNA1A;CATSPER1
cardiac muscle cell fate commitment	1	0.0187553	TBX3	protein catabolic process	135	3.43803e-06	RNF139;CDC34;BAG5;FBXW5;SF3B3;GBA;BBS7;CTSV;PSMF1;USP50;GSK3B;TRIM3;RPS7;VPS37A;BIRC6;SYVN1;PSMD8;PCYOX1;PSMD6;LYPLA1;RCHY1;ARIH2;RNF4;TRIB1;JKAMP;HTRA2;DNAJB9;BTRC;PSME2;PSMD9;UBE2E1;FBXO45;RNF144B;RBCK1;PSMA7;TMEM67;FOXRED2;HSP90B1;ATXN3;GPX1;CUL2;UBA6;RNF167;ZFAND2B;RAB26;USP47;GGA3;PRSS16;PSMB1;MAD2L1;FBXO11;NUDT15;HGS;SIAH3;CDC16;HSPA8;CDK1;ABHD17B;USP19;UBXN1;PCBP2;CLTC;ERLIN1;OS9;CHEK2;MAN…	cerebral cortex GABAergic interneuron migration	1	0.0179152	ARX	potassium ion export	6	0.00769501	KCNE1;KCNK18;KCNT2;KCNE2;KCNA10;KCND3	ubiquitin ligase complex	65	4.11203e-06	MED31;RNF217;UBE2A;FBXO27;FBXL4;KLHL24;UBE2L3;KCTD10;USP47;PDCD6;GAN;NEDD4;FBXW4;CUL9;KEAP1;TMEM189-UBE2V1;FBXL12;TRAF7;FBXO2;TRIM21;FBXL5;MED10;UBR2;FBXO33;ANAPC4;DCUN1D4;RCHY1;PCGF5;DEPDC5;VHL;RNF168;KLHL25;TSPAN17;FBXW11;ANKIB1;BARD1;UBE2E1;RNF144B;MAEA;PHC2;KLHL13;CAND1;FBXW5;ZER1;CDC26;SPOP;RNF8;FBXO4;UBE2C;FBXO9;KLHL7;BTRC;UBE2D2;RANBP10;ARMC8;ANAPC7;ANAPC5;FBXO10;MED27;RNF7;RNF40;KLHL42;DC…	sodium ion transmembrane transporter activity	13	0.0165505	SLC5A2;SLC6A2;SLC1A6;ASIC2;SCN4A;GRIK3;ASIC5;GRIK5;NALCN;SCN5A;SCN11A;SLC6A9;SLC5A7
post-embryonic animal organ morphogenesis	1	0.0187553	BAK1	protein modification by small protein conjugation or removal	152	3.59635e-06	SPATA2;RNF31;RNF139;CDC34;PDCD6;BAG5;MED31;FBXW5;OTUD3;ZNF598;PCGF5;RNF208;PSMF1;FKBP1A;PEX10;U2AF2;RANBP2;USP50;TRIM3;RPS7;BIRC6;MKRN1;SYVN1;PSMD8;PSMD6;RCHY1;ASB15;GPS1;ARIH2;ARRDC4;XIAP;RNF4;NAE1;CCP110;ACTR5;GNL3;BTRC;PSME2;PSMD9;UBE2E1;UVSSA;FBXO45;RNF144B;ASB2;RBCK1;STAMBP;RNF182;SUMO3;PSMA7;JOSD1;CLSPN;ATXN3;WSB1;COPS6;HLTF;TRIM21;CUL2;UBA6;THOP1;ZNF451;RNF167;USP47;RPS3;PCGF6;PSMB1;ENY2;P…	interneuron migration	1	0.0179152	ARX	potassium ion export across plasma membrane	6	0.00769501	KCNE1;KCNK18;KCNT2;KCNE2;KCNA10;KCND3	positive regulation of catalytic activity	246	4.22769e-06	EIF2AK2;MAP3K8;GDI1;TIRAP;AGT;FZD8;TBC1D25;RSU1;TBC1D22B;TOM1L1;TERF2;RGS1;POT1;PFN1;STARD13;SPDYA;ATP1B1;AKAP5;MAGED1;UBE2L3;TBC1D10B;HMGN1;MMD;RFC3;ACAP2;PLCB1;ARHGDIB;CCNYL1;PDCD6;FAM13A;DOCK10;ARHGAP18;PRKD1;P2RX7;HSP90AA1;DNAJC24;CACNA1D;EIF5;DDRGK1;PLCG1;ARHGAP20;OCRL;DDR2;PCOLCE;ARHGAP21;F3;NCAPG2;BNIP2;ADNP;TGFBR2;EPHA4;ARHGAP33;SRGAP2;GHR;DNAJA2;HNRNPD;APH1B;CASP3;TXK;NSMAF;APC2;DYNLL1;A…	voltage-gated potassium channel activity	9	0.0169121	KCNB2;KCNA1;KCNT2;KCNK18;KCNQ3;KCNA4;KCNT1;KCNV1;KCNQ2
positive regulation of cell maturation	1	0.0187553	TRIM58	regulation of cell cycle process	109	4.39776e-06	PEBP1;IK;FBXW5;HNRNPU;CNOT6;BIRC6;ORC1;PHC3;EZH2;TTK;RNF4;AURKAIP1;NAE1;CCP110;CCNI;PIDD1;BTRC;PSME2;PLAGL1;BUB1;GEN1;UBE2E1;ERCC2;ZNF207;TUBB;NIPBL;MEPCE;TMEM67;CLSPN;YWHAG;JADE1;PSMG2;MEN1;TAS1R2;CDK2AP2;IGF2;USP47;APAF1;PCGF6;MAD2L1;STOX1;SDE2;CDC16;CDK9;CENPJ;CDK1;SDCCAG8;USP19;PRC1;RAD17;BORA;APEX1;CTCF;CLTC;WEE1;CHEK2;DYNLL1;ANLN;CHMP2A;CDC26;SH2B1;TUBB4B;TMOD3;DDRGK1;CCNK;RDX;ZNF16;ANAPC4;…	positive regulation of alkaline phosphatase activity	1	0.0179152	ITGA2	release of sequestered calcium ion into cytosol by endoplasmic reticulum	8	0.00779413	CCL3;TRDN;RYR1;ANK2;DHRS7C;METTL21C;RYR2;CALM1	purine ribonucleotide binding	318	4.25241e-06	KIF27;ADK;ACTR3;ERCC2;EIF2AK2;N4BP2;CDC42BPA;MAP3K8;BBS12;VRK2;UCKL1;GFM2;NEK9;UBE2A;CDK17;CTPS2;NME4;CBWD2;TTL;BUB1;CDC34;EIF2S3;TUBB;WNK4;FIGNL1;PMVK;TTK;LANCL2;ATP1B1;P2RX2;LARS2;WEE1;ABCD4;MAST2;STK16;UBE2L3;CHEK2;TTLL7;STKLD1;DARS;APRT;ETNK1;EPHB4;STK35;MFN2;PRKD1;P2RX7;HSP90AA1;DDX50;PAPSS2;EIF5;GALK2;DDR2;NUDT16;ATP6V1B2;ULK2;ABCD3;ASNS;FES;DRG1;AURKA;RAB2A;RAB36;ACVR1;DDX24;TGFBR2;ABCB9;E…	G protein-coupled receptor signaling pathway, coupled to cyclic nucleotide second messenger	19	0.0176033	GPR26;LHCGR;ADCY8;GRM6;GRIK3;HTR5A;OPRM1;OR6T1;CCL2;GPHB5;DRD5;HTR1E;HRH4;VIP;MARCO;OR56A5;SSTR3;HTR2A;HRH2
enucleate erythrocyte differentiation	1	0.0187553	TRIM58	RNA splicing, via transesterification reactions with bulged adenosine as nucleophile	61	4.87687e-06	CCAR1;RBM15B;SRSF11;IK;DHX16;HNRNPA0;SF3B3;HNRNPU;U2AF2;HNRNPUL1;RBM5;SRSF3;SMNDC1;MAGOH;HNRNPF;TXNL4A;PTBP1;RBM3;SF1;PRPF6;NUDT21;SCAF11;SNRNP200;YBX1;POLR2J;HNRNPC;SNRPG;PNN;POLR2I;RBM11;RBFOX3;PRPF4B;HSPA8;DDX5;BUD13;PCBP2;SNRPB;CPSF3;GEMIN8;HNRNPA3;DDX17;PUF60;LUC7L;RBM15;SNRPD3;NCBP2L;SF3B1;TRA2A;PRPF3;SREK1;PRPF19;RBM41;METTL14;FUS;RBM25;POLR2L;SF3B2;CLNS1A;SF3A2;SFPQ;NUP98	regulation of mesenchymal stem cell differentiation	1	0.0179152	SOX9	negative regulation of synaptic transmission	14	0.00921904	HTR2A;ADIPOQ;SYT11;SLC24A1;ADCY8;SLC6A1;DGKI;GRIK3;ARF1;NPY5R;SORCS3;STXBP1;TNR;SLC24A2	positive regulation of molecular function	297	5.44879e-06	LRRC52;EDA;ERCC2;FKBP1A;EIF2AK2;MAP3K8;GDI1;TIRAP;AGT;FZD8;TBC1D25;RSU1;CLIC2;TBC1D22B;TOM1L1;TERF2;RGS1;POT1;PFN1;LRRFIP1;TRIM8;WNK4;STARD13;ERC1;TRIM25;SPDYA;ATP1B1;AKAP5;RTKN2;MAGED1;UBE2L3;TBC1D10B;HMGN1;MMD;RFC3;ACAP2;PLCB1;FMR1;ARHGDIB;CCNYL1;PDCD6;FAM13A;DOCK10;ARHGAP18;PRKD1;P2RX7;HSP90AA1;PLCL1;DNAJC24;CACNA1D;EIF5;DDRGK1;PLCG1;ARHGAP20;OCRL;DDR2;DDIT3;GAL;PCOLCE;ARHGAP21;F3;NCAPG2;BNIP2…	voltage-gated potassium channel complex	9	0.0180934	DPP6;KCNB2;KCNA1;DPP10;KCNQ3;KCNA4;KCNIP4;KCNV1;KCNQ2
regulation of organelle transport along microtubule	1	0.0187553	TRIM58	mRNA splicing, via spliceosome	61	4.87687e-06	CCAR1;RBM15B;SRSF11;IK;DHX16;HNRNPA0;SF3B3;HNRNPU;U2AF2;HNRNPUL1;RBM5;SRSF3;SMNDC1;MAGOH;HNRNPF;TXNL4A;PTBP1;RBM3;SF1;PRPF6;NUDT21;SCAF11;SNRNP200;YBX1;POLR2J;HNRNPC;SNRPG;PNN;POLR2I;RBM11;RBFOX3;PRPF4B;HSPA8;DDX5;BUD13;PCBP2;SNRPB;CPSF3;GEMIN8;HNRNPA3;DDX17;PUF60;LUC7L;RBM15;SNRPD3;NCBP2L;SF3B1;TRA2A;PRPF3;SREK1;PRPF19;RBM41;METTL14;FUS;RBM25;POLR2L;SF3B2;CLNS1A;SF3A2;SFPQ;NUP98	intestinal epithelial structure maintenance	1	0.0179152	SOX9	cellular response to calcium ion	16	0.0095095	SLC25A24;KCNH1;SCN5A;SYT11;RYR1;ADCY8;CHP2;RYR3;TRPM2;SYT8;ACER1;CARF;SYT5;SYT17;HSPA5;WNK1	ribonucleotide binding	319	6.31736e-06	KIF27;ADK;ACTR3;ERCC2;EIF2AK2;N4BP2;CDC42BPA;MAP3K8;BBS12;VRK2;UCKL1;GFM2;NEK9;UBE2A;CDK17;CTPS2;NME4;CBWD2;TTL;BUB1;CDC34;EIF2S3;TUBB;WNK4;FIGNL1;PMVK;TTK;LANCL2;ATP1B1;P2RX2;LARS2;WEE1;ABCD4;MAST2;STK16;UBE2L3;CHEK2;TTLL7;STKLD1;DARS;APRT;ETNK1;EPHB4;STK35;MFN2;PRKD1;P2RX7;HSP90AA1;DDX50;PAPSS2;EIF5;GALK2;DDR2;NUDT16;ATP6V1B2;ULK2;ABCD3;ASNS;FES;DRG1;AURKA;RAB2A;RAB36;ACVR1;DDX24;TGFBR2;ABCB9;E…	glutamate-gated calcium ion channel activity	2	0.0183128	GRIN2B;GRIN2A
tangential migration from the subventricular zone to the olfactory bulb	1	0.0187553	ARX	cellular protein localization	245	5.2295e-06	SRP14;RNF31;SCRIB;RBM15B;PDCD6;SRSF11;COPB1;TBC1D22B;IK;DHRS4;RPL21;RPL10;ARF1;RPLP2;RPL37A;YWHAB;ACOX1;MAPK1;TLK1;HNRNPU;PEX10;U2AF2;RANBP2;GSK3B;RER1;SRP9;RPS7;RAB9B;KPNB1;PEX26;SEC24D;SYVN1;CHCHD4;EZH2;SRSF3;RPL30;LYPLA1;CTDSPL2;RPS15A;ARF5;PMM2;RPS3A;KPNA4;ARIH2;MAGOH;TTK;ARL13B;PTPN9;UPF2;HTRA2;HSPD1;GNL3;UBL4A;ARFIP2;TMED4;HRAS;RPL35;RPS8;RPL8;RPLP1;RPS14;PEX1;YBX1;PEX19;IDH1;TMED3;YWHAZ;PE…	metanephric tubule formation	1	0.0179152	SOX9	extrinsic component of postsynaptic membrane	4	0.00952355	CTNNA2;SCRIB;TIAM1;DGKI	purine ribonucleoside triphosphate binding	307	6.36779e-06	KIF27;ADK;ACTR3;ERCC2;EIF2AK2;N4BP2;CDC42BPA;MAP3K8;BBS12;VRK2;UCKL1;GFM2;NEK9;UBE2A;CDK17;CTPS2;NME4;CBWD2;TTL;BUB1;CDC34;EIF2S3;TUBB;WNK4;FIGNL1;PMVK;TTK;LANCL2;ATP1B1;P2RX2;LARS2;WEE1;ABCD4;MAST2;STK16;UBE2L3;CHEK2;TTLL7;STKLD1;DARS;ETNK1;EPHB4;STK35;MFN2;PRKD1;P2RX7;HSP90AA1;DDX50;PAPSS2;EIF5;GALK2;DDR2;NUDT16;ATP6V1B2;ULK2;ABCD3;ASNS;FES;DRG1;AURKA;RAB2A;RAB36;ACVR1;DDX24;TGFBR2;ABCB9;EPHA4;…	GABA-ergic synapse	8	0.0187751	NRG1;CDH13;ACAN;GABRB1;ATP2B2;GABRA4;RPS27;IGSF9B
fibrinogen complex	1	0.0187553	FGL1	mitotic cell cycle process	121	5.83857e-06	EPS8;PEBP1;CDC34;DHFR;IK;FBXW5;ARF1;HNRNPU;CNOT6;KPNB1;ORC1;EZH2;TTN;POLE4;CKS2;TTK;MCM6;AURKAIP1;NAE1;CCP110;SPC25;CCNI;JTB;TTC19;HRAS;PIDD1;BTRC;PSME2;PLAGL1;BUB1;GEN1;UBE2E1;ERCC2;ZNF207;TUBB;STAMBP;NIPBL;MEPCE;CLSPN;YWHAG;JADE1;PSMG2;TOP2A;CDK2AP2;CUL2;IGF2;USP47;MAD2L1;STOX1;KIF18A;CDC16;CENPJ;CDK1;SDCCAG8;PRC1;RAD17;BORA;APEX1;CLTC;WEE1;RASA1;CHEK2;DYNLL1;ANLN;CDKN2C;CHMP2A;CDC26;UBE2S;SH2B…	cortical endoplasmic reticulum	1	0.0179152	STIM1	cytosolic calcium ion transport	26	0.00952529	FGF2;GRIN2B;HTR2A;CCL3;SLC8A3;GRIN2A;ADCYAP1R1;FAM155A;TRDN;RYR1;ANK2;PLCG2;TRPC3;BDKRB1;RYR3;TRPM2;DHRS7C;METTL21C;UBASH3B;CEMIP;RYR2;JPH3;P2RX3;TGFB1;CALM1;MCUR1	nucleoside monophosphate metabolic process	73	6.36897e-06	ADK;ATIC;COX7C;ALDOA;NT5M;UCKL1;HDDC2;CDADC1;FIGNL1;NDUFAF1;ATP1B1;APRT;DCTD;SDHC;NDUFS4;P2RX7;ATP6V1B2;ENO3;NUDT11;PGK1;PPARA;GMPR2;UCK1;ENO2;TK2;AK7;GAPDH;PRPS1;ZBTB20;SLC25A12;DLG2;NDUFB2;NDUFS8;EIF6;LDHC;NDUFS2;ENO4;CMPK2;BAD;GALK1;PRKAG2;AK4;AK3;SLC25A13;NDUFB4;PPIF;PGAM1;TK1;CYC1;GUK1;UPP1;ADPGK;NDUFB7;HDAC4;NDUFA4;PFKFB1;UQCC2;SHMT1;COX15;UQCRC1;FBP1;DTYMK;UQCRFS1;PID1;ENO1;ADSS;UQCRC2;NUD…	calcium channel activity	11	0.0199642	CATSPER2;TRPC5;RYR3;GRIN2B;GRIN2A;OPRM1;CACNG2;JPH3;CACNG3;CACNA1A;CATSPER1
angiotensin receptor binding	1	0.0187553	JAK2	proteasome-mediated ubiquitin-dependent protein catabolic process	69	5.94972e-06	CDC34;BAG5;FBXW5;GBA;BBS7;GSK3B;TRIM3;SYVN1;PSMD8;PSMD6;RCHY1;ARIH2;RNF4;TRIB1;JKAMP;DNAJB9;BTRC;UBE2E1;FBXO45;RNF144B;RBCK1;PSMA7;TMEM67;FOXRED2;HSP90B1;ATXN3;ZFAND2B;PSMB1;MAD2L1;SIAH3;CDC16;CDK1;USP19;UBXN1;PCBP2;ERLIN1;OS9;MAN1B1;RNF126;NEDD4;CDC26;UBE2S;BAG6;DCAF11;DDRGK1;SUMO2;DDIT3;RNF19B;ANAPC4;ANKZF1;PSMB6;PSMD7;PSMB4;UBXN4;ERCC8;FBXO5;UBE2C;SEC13;PTTG1;NHLRC1;TBL1XR1;SUMO1;CSNK1D;UBE2K;…	Bcl-2 family protein complex	1	0.0179152	BAK1	extrinsic component of presynaptic membrane	3	0.00952548	CTNNA2;PHB;DGKI	positive regulation of nucleobase-containing compound metabolic process	316	6.87592e-06	MED31;SMYD3;JADE1;SERTAD3;ACTR3;ERCC2;UBTF;LRP5L;SIX4;AGT;FZD8;PWP1;PHF10;SMARCD2;ICE2;POT1;SOX9;PATZ1;TAF6L;PF4;RLF;HIVEP3;ZNF345;ASF1A;HOXC10;SOX4;NFYB;OTUD4;MAGED1;MEX3D;FOXO3;STK16;UBE2L3;BCL9;CHEK2;HMGN1;RFC3;CBFB;ERLIN2;ARID1A;ZNF496;KLF13;PLCB1;TNRC6A;ETV6;NCL;PRKD1;P2RX7;HSP90AA1;SQSTM1;DDRGK1;NCOA6;H2AFX;NUDT16;DDIT3;GAL;MLLT3;EGLN1;E2F3;CCAR1;PKNOX1;DR1;HEXB;EXOSC6;ZNF639;GMEB1;TAF10;AC…	calcium ion transmembrane transporter activity	12	0.0202195	CATSPER2;TRPC5;RYR3;GRIN2B;GRIN2A;OPRM1;CACNG2;JPH3;ATP2B2;CACNG3;CACNA1A;CATSPER1
growth hormone receptor binding	1	0.0187553	JAK2	mitotic cell cycle phase transition	82	6.62776e-06	EPS8;CDC34;DHFR;IK;CNOT6;ORC1;EZH2;POLE4;CKS2;TTK;MCM6;NAE1;CCP110;PIDD1;BTRC;PSME2;PLAGL1;BUB1;GEN1;UBE2E1;ERCC2;ZNF207;TUBB;MEPCE;CLSPN;YWHAG;JADE1;PSMG2;CDK2AP2;CUL2;USP47;MAD2L1;STOX1;CDC16;CENPJ;CDK1;SDCCAG8;RAD17;BORA;APEX1;WEE1;CHEK2;DYNLL1;ANLN;CDKN2C;CHMP2A;CDC26;UBE2S;TUBB4B;TMOD3;RDX;ANAPC4;PCNA;DCTN3;CCND1;TACC3;KMT2E;CNOT1;FBXO5;CDK5RAP3;UBE2C;DBF4;HAUS2;TAF10;MAD2L2;DLGAP5;RAD51C;CE…	beta-galactosidase activity	1	0.0179152	GLB1L	extrinsic component of postsynaptic density membrane	3	0.00952548	SCRIB;TIAM1;DGKI	cellular macromolecule catabolic process	202	7.55485e-06	BBS7;RNF217;TIRAP;RPL13;RNF139;ATE1;RPL10;UBE2A;TOM1L1;ALKBH5;CDC34;HNRNPA0;USP18;ANGEL2;TRIM25;FBXL4;IGF2BP2;PCYOX1;CNOT10;UPF3A;MEX3D;UBE2L3;RNF103;KCTD10;CHEK2;USP47;ERLIN2;N4BP1;USP11;RPL28;DNAJB9;FMR1;TNRC6A;DROSHA;RNASEH1;HSP90AA1;SQSTM1;DDRGK1;ITCH;NUDT16;DDIT3;PTTG1IP;STYX;AURKA;ANKZF1;EXOSC6;DCPS;NEDD4;USP45;MAGOH;EPHA4;CNOT6;USP12;RNF187;FBXW4;HNRNPD;CASP3;RPLP0;RNASET2;NUP214;CUL9;AMER…	chloride transport	10	0.0204892	GABRE;SLC26A5;GRM5;GABRB1;CLCN6;GLRA1;GABRA6;GABRA4;CLCN7;GABRP
serine-type endopeptidase inhibitor activity	2	0.0191679	SERPINB7;SERPINB3	cytosolic large ribosomal subunit	19	7.51006e-06	RPL21;RPL10;RPLP2;RPL37A;RPL22L1;RPL30;RPL35;RPL8;RPLP1;RPL6;RPL37;RPL31;MRPL1;RPL13;RPLP0;RPL22;RPL18A;RPL10A;RPL4	Coagulation factor VIIa Recombinant Human	1	0.0179152	F3	ligand-gated anion channel activity	6	0.0102742	GLRA1;GABRB1;GABRE;GABRB3;GLRA3;GABRA3	chromosome organization	207	9.07036e-06	SMYD3;JADE1;ERCC2;BRD9;PWP1;PHF10;RCBTB1;GAR1;SMARCD2;KDM5B;UBE2A;TERF2;POT1;MAP10;BUB1;SOX9;TAF6L;TTK;RLF;ASF1A;BRPF3;ZNF207;HMGN1;H3F3A;RFC3;STAG3;NAA50;ARID1A;FMR1;PRKD1;CHMP7;HSP90AA1;ITGB3BP;RBBP4;H2AFX;SATB1;HDAC10;MSL1;PRDM5;SEH1L;AURKA;PHF23;DR1;CENPU;NCAPG2;STAG2;BCORL1;TAF10;PAXIP1;CHAMP1;HNRNPD;ZWINT;ERCC3;RBM14-RBM4;HIRIP3;DDX1;MRGBP;HP1BP3;RNF4;SMARCD1;ANP32B;SETD5;TBL1XR1;XRCC3;ACD;…	regulation of ERK1 and ERK2 cascade	22	0.0214716	FGF23;CCL13;NTRK3;CIB1;OPRM1;PDGFD;CCL2;FGA;BTN2A2;CCL7;SYK;DDT;EPHB1;MARCO;CCL1;TREM2;DNAJC27;CCL4L1;FGB;NPY5R;HTR2A;CCL11
negative regulation of peptidase activity	3	0.0194208	SERPINB7;SERPINB3;ANXA8	nucleobase-containing compound catabolic process	90	7.80956e-06	HINT1;NT5M;SLIRP;RPL21;HNRNPA0;RPL10;RPLP2;RPL37A;TIRAP;YWHAB;HNRNPU;CNOT6;RPS7;KPNB1;RPL30;RPS15A;RPS3A;MAGOH;ENTPD7;UPF2;ST20;ANGEL2;DICER1;PNRC2;RPL35;RPS8;GEN1;RPL8;RPLP1;ENO3;RPS14;ZC3H14;YBX1;YWHAZ;RPL6;RPL37;HNRNPC;RPL31;ADAL;RPS11;GPX1;JMJD8;SAMD4A;APAF1;RPS3;PGK1;PNP;HMGB1;RPS15;NUDT15;HSPA8;APOBEC1;KHSRP;DDX5;APEX1;ENTPD8;MTPAP;MAPK14;RPL13;RNASET2;RPSA;TPI1;PDE5A;LRPPRC;SLFN14;CNOT1;SM…	Amodiaquine	1	0.0179152	HNMT	calcium ion transmembrane import into cytosol	22	0.0103124	FGF2;GRIN2B;HTR2A;CCL3;SLC8A3;GRIN2A;FAM155A;TRDN;RYR1;ANK2;PLCG2;BDKRB1;RYR3;TRPM2;DHRS7C;METTL21C;UBASH3B;CEMIP;RYR2;JPH3;TGFB1;CALM1	DNA repair	105	9.78366e-06	ERCC2;FANCA;UBE2A;TERF2;ALKBH5;NEIL2;TRIM25;FIGNL1;ASF1A;UVSSA;POLI;CHEK2;USP47;HMGN1;RFC3;NONO;ERCC5;NUDT16L1;NCOA6;H2AFX;NUDT16;PAXIP1;USP45;FANCG;CCNH;NABP1;ERCC3;RBM14-RBM4;MMS19;DDX1;CLSPN;WDR48;TMEM189-UBE2V1;PARP2;POLR2L;XRCC3;RAD9B;APBB1;NPLOC4;UHRF1;PTTG1;GEN1;AXIN2;RCHY1;FANCB;POLG2;GTF2H1;ATRX;USP51;RNF168;POLR2C;POLE2;WAS;HUWE1;AP5Z1;JMY;POLD2;CHAF1B;HELQ;BARD1;DCLRE1B;TDP1;SPIDR;MSH6…	excitatory synapse	6	0.0215345	CADM3;ADCY8;CACNG3;SLC17A6;GRIA2;SLC6A9
actin crosslink formation	1	0.0210754	ACTN1	cellular macromolecule localization	245	7.83161e-06	SRP14;RNF31;SCRIB;RBM15B;PDCD6;SRSF11;COPB1;TBC1D22B;IK;DHRS4;RPL21;RPL10;ARF1;RPLP2;RPL37A;YWHAB;ACOX1;MAPK1;TLK1;HNRNPU;PEX10;U2AF2;RANBP2;GSK3B;RER1;SRP9;RPS7;RAB9B;KPNB1;PEX26;SEC24D;SYVN1;CHCHD4;EZH2;SRSF3;RPL30;LYPLA1;CTDSPL2;RPS15A;ARF5;PMM2;RPS3A;KPNA4;ARIH2;MAGOH;TTK;ARL13B;PTPN9;UPF2;HTRA2;HSPD1;GNL3;UBL4A;ARFIP2;TMED4;HRAS;RPL35;RPS8;RPL8;RPLP1;RPS14;PEX1;YBX1;PEX19;IDH1;TMED3;YWHAZ;PE…	peroxisomal transport	2	0.0183289	NUDT7;ACOT2	Golgi-associated vesicle membrane	19	0.0125036	COPB1;HLA-DQA2;HLA-DPA1;HLA-DPB1;STX5;HLA-DQA1;HLA-F;SEC13;COPA;CNGA2;GOSR2;ZDHHC17;SEC24D;ARCN1;KLHL12;CNGA4;HLA-DRA;PDCD6;RHO	nucleoside phosphate metabolic process	128	1.26704e-05	HINT1;ADK;ADAL;ATIC;COX7C;PRPSAP2;ALDOA;NT5M;UCKL1;GPD2;CTPS2;NME4;HDDC2;NEIL2;CDADC1;FIGNL1;PMVK;SLC35B3;NME9;NDUFAF1;ATP1B1;SLC25A1;APRT;DCTD;SDHC;NDUFS4;P2RX7;PAPSS2;G6PD;NUDT16;ATP6V1B2;AADAT;ENO3;DLAT;ADCY3;MFN1;ENTPD4;BST1;NUDT11;PGK1;PPARA;NNT;PNP;GMPR2;MTHFD2L;UCK1;NT5C1B-RDH14;ENO2;PDK1;KARS;TK2;AK7;GAPDH;PPCS;RRM1;RNLS;PRPS1;ZBTB20;FHIT;PDE8B;SLC25A12;DLG2;NME1;NDUFB2;NDUFS8;EIF6;CDIPT;…	chloride channel complex	6	0.0215345	GABRE;GABRB1;GLRA1;GABRA6;GABRA4;GABRP
regulation of protein heterodimerization activity	1	0.0210754	BAK1	RNA transport	37	1.10999e-05	EIF5;EIF2S2;EIF3B;RANBP2;EIF4A1;KPNB1;EIF4G2;MAGOH;UPF2;EIF2B1;SUMO3;EIF2B4;THOC3;PNN;EIF1AX;NUP88;EIF4B;SUMO2;GEMIN8;POM121;TACC3;EIF2B2;SEC13;XPO1;EIF3E;NUP210L;EIF3A;RANGAP1;SUMO1;NUP155;RPP21;EIF3J;EIF2S3;NUP133;CLNS1A;EIF1;NUP98	integral component of mitochondrial membrane	2	0.0183289	BAK1;COA3	ER to Golgi transport vesicle membrane	12	0.0128459	HLA-DQA2;HLA-DPA1;HLA-DPB1;STX5;HLA-DQA1;HLA-F;SEC13;GOSR2;SEC24D;KLHL12;HLA-DRA;PDCD6	nucleotide metabolic process	127	1.27771e-05	HINT1;ADK;ADAL;ATIC;COX7C;PRPSAP2;ALDOA;NT5M;UCKL1;GPD2;CTPS2;NME4;HDDC2;NEIL2;CDADC1;FIGNL1;PMVK;SLC35B3;NME9;NDUFAF1;ATP1B1;SLC25A1;APRT;DCTD;SDHC;NDUFS4;P2RX7;PAPSS2;G6PD;NUDT16;ATP6V1B2;AADAT;ENO3;DLAT;ADCY3;MFN1;ENTPD4;BST1;NUDT11;PGK1;PPARA;NNT;PNP;GMPR2;MTHFD2L;UCK1;NT5C1B-RDH14;ENO2;PDK1;KARS;TK2;AK7;GAPDH;PPCS;RRM1;RNLS;PRPS1;ZBTB20;FHIT;PDE8B;SLC25A12;DLG2;NME1;NDUFB2;NDUFS8;EIF6;CDIPT;…	ERK1 and ERK2 cascade	23	0.0216261	FGF23;CCL13;NTRK3;CIB1;OPRM1;PDGFD;MED1;CCL2;FGA;BTN2A2;CCL7;SYK;DDT;EPHB1;MARCO;CCL1;TREM2;DNAJC27;CCL4L1;FGB;NPY5R;HTR2A;CCL11
natural killer cell mediated cytotoxicity directed against tumor cell target	1	0.0210754	CD226	response to endoplasmic reticulum stress	51	1.36144e-05	RNF139;GSK3B;EIF2AK2;SYVN1;TMEM33;JKAMP;DNAJB9;SRPRB;EEF2;P4HB;DNAJB11;TMEM67;FOXRED2;HSP90B1;ATXN3;GRINA;KLHDC3;GOSR2;YIF1A;APAF1;COPS5;USP19;UBXN1;ERLIN1;OS9;MAN1B1;BAG6;DDRGK1;JUN;FCGR2B;DDIT3;ERP29;ANKZF1;ATF3;VAPB;CCND1;SDF2L1;UBXN4;DDX11;CDK5RAP3;SEC13;PTPN1;TMCO1;ARFGAP1;TMBIM6;UBE2K;ASNA1;ATF6B;CREB3L4;DERL1;RNF103	carbohydrate derivative catabolic process	3	0.0184658	NGLY1;NUDT7;FMOD	detection of external stimulus	22	0.0134485	GJA10;KCNA1;HTR2A;GRM6;RCVRN;NOX3;CSRP3;PDE6B;EPHB1;OTOP1;CACNA2D4;TRPC3;GNGT2;NR2E3;DRGX;PKD2L1;METAP2;RP1;AIPL1;CALM1;PIEZO2;RHO	positive regulation of hydrolase activity	143	1.33735e-05	GDI1;AGT;TBC1D25;RSU1;TBC1D22B;RGS1;POT1;PFN1;STARD13;ATP1B1;TBC1D10B;ACAP2;PLCB1;ARHGDIB;PDCD6;FAM13A;DOCK10;ARHGAP18;PRKD1;DNAJC24;EIF5;DDRGK1;PLCG1;ARHGAP20;OCRL;PCOLCE;ARHGAP21;F3;BNIP2;EPHA4;ARHGAP33;SRGAP2;DNAJA2;CASP3;TXK;APC2;DYNLL1;ARFGAP2;RAPGEF2;RPS27L;ANTXR1;EFNA3;TBC1D19;ELMOD1;ARHGAP12;KARS;ARHGAP1;RABGAP1L;ANP32B;APAF1;TBC1D4;PPARG;AGFG1;AVPR1B;RANBP1;ARHGAP4;GSK3B;COL4A3;ARFGAP3;R…	voltage-gated sodium channel complex	3	0.0225217	SCN4A;SCN5A;SCN11A
natural killer cell mediated immune response to tumor cell	1	0.0210754	CD226	regulation of mitotic cell cycle	92	1.90732e-05	PEBP1;SCRIB;IK;FBXW5;HNRNPU;CNOT6;ORC1;EZH2;CKS2;TTK;AURKAIP1;NAE1;CCP110;ANGEL2;CCNI;HRAS;PIDD1;BTRC;PSME2;PLAGL1;BUB1;GEN1;UBE2E1;ERCC2;ZNF207;TUBB;NIPBL;MEPCE;CLSPN;YWHAG;FOXA1;JADE1;PSMG2;TOP2A;CDK2AP2;IGF2;USP47;MAD2L1;STOX1;CDC16;CDK9;CENPJ;CDK1;SDCCAG8;RAD17;BORA;APEX1;CLTC;WEE1;CHEK2;DYNLL1;ANLN;CHMP2A;CDC26;SH2B1;TUBB4B;TMOD3;RDX;NABP2;ANAPC4;PCNA;DCTN3;CCND1;TACC3;KMT2E;CNOT1;FBXO5;THAP…	Transcriptional misregulation in cancer	3	0.0184658	HOXA10;BAK1;SS18	integral component of postsynaptic density membrane	11	0.0140971	GRIK5;DCC;CACNG3;PTPRO;GRIN2A;CACNG2;CHRM3;GRID1;LRRC4B;SORCS3;EFNB3	protein polyubiquitination	60	1.39455e-05	XIAP;RNF217;UBE2A;CDC34;FBXO27;FBXL4;UBE2L3;CBFB;ITCH;FBXW2;NEDD4;RNF187;FBXW4;HECTD2;PPIL2;MKRN1;CHFR;TMEM189-UBE2V1;FBXL12;RNF4;FBXO2;UBE2K;TRIM21;FBXL5;HERC6;UBR2;ANAPC4;TRIM56;TPP2;RNF168;HUWE1;LONRF1;NPEPPS;FBXW11;ANKIB1;BARD1;UBE2E1;TRIM2;MYLIP;RNF144B;BIRC2;FBXW5;ZNRF2;TRIM44;CDC26;RNF8;FBXO4;UBE2C;FBXO9;BTRC;UBE2D2;SASH1;ANAPC7;ANAPC5;UBE3A;FBXO10;CBL;RNF40;KLHL42;ARIH1	positive regulation of response to external stimulus	21	0.0234616	JAK2;S100A14;TLR2;DHX58;CDH13;NTRK3;S100A9;OPRM1;PDGFD;CMKLR1;S100A12;TSLP;CCL7;CCR6;DDT;CCL1;CCL4L1;NPY5R;NTF3;NLRP10;TGM2
regulation of natural killer cell mediated immune response to tumor cell	1	0.0210754	CD226	structural molecule activity	119	1.93407e-05	MAGI3;KRT1;KRT6C;COPB1;RPL21;RPL10;EIF3B;RPLP2;RPL37A;RPL22L1;KRT75;ENAM;DCN;RPS7;KRT73;RPL30;MRPS25;RPS15A;RPS3A;TTN;KRT76;EPPK1;MRPL28;KRT6A;MRPL37;RPL35;RPS8;RPL8;RPLP1;RPS14;SPTB;KRT77;ARPC4;TUBB;BSN;LMNB2;STATH;RPL6;RPL37;RPL31;MRPL9;RPS11;MRPL51;KRT74;COPA;PNN;RPS3;MRPL24;RPS15;LOR;CDC42SE1;TECTB;CD3G;JAG1;MRPL1;MATN3;CLTC;RB1CC1;NUP88;KRT6B;PRG3;KRT79;TUBB4B;CTNNA2;MYOM1;RPL13;RGS14;NUTF2;…	intrinsic component of mitochondrial membrane	2	0.018832	BAK1;COA3	Nilotinib	4	0.0145814	CYP2C8;CYP2B6;CYP3A4;CYP2C9	nuclear body	142	1.4551e-05	JADE1;GAR1;TERF2;ICE2;ALKBH5;UNC45A;CDC34;TRIM8;ANGEL2;TRIM25;FBXL4;HOXC10;FYTTD1;PRPF40B;POLI;THOC3;BHLHE40;CHEK2;N4BP1;PLCB1;GPATCH2;FMR1;NONO;STK35;ARHGAP18;SQSTM1;ATXN2L;SNRNP40;H2AFX;SATB1;PRDM5;RAPH1;DRG1;NCAPG2;MAGOH;ZWINT;THRB;AMER1;RBM14-RBM4;CHFR;SH3BGRL3;DDX1;SMNDC1;HP1BP3;RNF4;SYNPO2L;UBE2I;MDM2;ACD;LPXN;APBB1;PTK6;BNIP3L;WDFY3;ATMIN;XPO1;SF3B2;NR1I2;IK;KIF2A;HOXB2;ZC3H14;ZBTB20;RNPS1…	calcium channel complex	7	0.0239365	CATSPER2;TRPC5;RYR3;CACNG2;CACNG3;CACNA1A;CATSPER1
regulation of natural killer cell mediated cytotoxicity directed against tumor cell target	1	0.0210754	CD226	unfolded protein binding	28	2.16792e-05	DNAJA2;PFDN6;HSPA9;SYVN1;CHAF1A;HTRA2;HSPD1;DNAJB11;TMEM67;HSP90B1;DNAJB6;CCT4;NAP1L4;HSPA8;PPIB;CCT6A;TUBB4B;TAPBP;PTGES3;LMAN1;PPIL6;PFDN2;CCT7;ST13;SHQ1;NPM1;PPIC;PFDN5	phospholipid transport	2	0.0193409	PCTP;KCNN4	adenylate cyclase-modulating G protein-coupled receptor signaling pathway	33	0.0154141	APLP1;GNG2;MARCO;GRM6;FPR1;ADRA1B;OR56A5;VIP;GPHB5;OPRM1;RXFP2;CHRM3;HTR1E;ADCY8;GPR26;MC2R;RXFP1;NPY1R;MC4R;PSAPL1;LHCGR;GNA15;GRIK3;HTR5A;ADM2;GNAL;CNR1;RIC8A;GLP2R;PDE2A;PTGIR;CASR;PRMT5	protein kinase activity	127	1.48851e-05	ERCC2;EIF2AK2;CDC42BPA;MAP3K8;VRK2;NEK9;CDK17;BUB1;WNK4;TTK;WEE1;MAST2;PHKA1;STK16;CHEK2;MMD;PHKA2;STKLD1;ERLIN2;EPHB4;STK35;PRKD1;HSP90AA1;SQSTM1;DDR2;ULK2;FES;AURKA;ACVR1;TGFBR2;EPHA4;SIK2;POMK;TXK;AAK1;CCNH;ERCC3;SRPK3;CDK18;EFNA3;PDK1;CDK5R1;PIM1;STK24;PTK6;DMPK;GSK3B;LTBP1;SCYL1;PDGFRL;EPHA7;MARK1;RIOK1;NRBP2;CRIM1;RPS6KC1;GTF2H1;MET;RPS6KA6;FGF20;IL5;CAB39;AKAP13;MAP3K5;SNRK;ANKK1;TOP1;MAP3…	integral component of postsynaptic density membrane	6	0.0257409	GRIN2A;CACNG2;SORCS3;CACNG3;GRIK5;DCC
regulation of glomerular mesangial cell proliferation	1	0.0210754	SERPINB7	ncRNA metabolic process	86	3.01333e-05	CCNT1;BOP1;RPS7;NCL;WDR55;HEATR1;GTF3A;TRMT11;DICER1;TAF13;HRAS;BTRC;AIMP1;RPL35;RPS8;LAGE3;NSUN2;RPS14;CD3EAP;SNAPC5;TBL3;ELP6;RTCB;TDRD9;IARS;MEPCE;IMP4;POLR2J;TRUB1;ABT1;EMG1;KRR1;TSEN34;RPS15;POLR2I;TRMT10C;URB1;CDK9;KHSRP;MRPL1;PWP1;TSEN2;CPSF3;METTL1;FTSJ1;INTS5;FTSJ3;CCNK;GAR1;NABP2;RPSA;DDX17;PPA1;H2AFY2;NOP10;NOP56;KARS;RPF2;MOCS3;SLFN14;QARS;DDX11;TARS2;EARS2;ZNHIT6;SBDS;SHQ1;RPS2;FARSB…	DNA-binding transcription factor activity, RNA polymerase II-specific	10	0.0195818	ZNF211;ZNF418;HOXA10;ZNF510;ZNF613;BTG2;ARX;SOX9;ZSCAN23;CUX2	sequestering of calcium ion	20	0.0159535	FGF2;HTR2A;CCL3;TRDN;RYR1;ANK2;PLCG2;BDKRB1;RYR3;TRPM2;DHRS7C;METTL21C;HSP90B1;UBASH3B;CEMIP;RYR2;CALR;JPH3;TGFB1;CALM1	translation	121	1.56066e-05	MIF4GD;MRPL28;EIF2AK2;MRPL44;MRPL46;EIF2S2;RPL13;MRPS18A;SECISBP2L;RNF139;MRPS10;RPL10;GFM2;EIF4G3;DPH7;EIF2S3;MRPL17;IGF2BP2;SOX4;CNOT10;UPF3A;LARS2;MEX3D;SRP9;EIF1;FOXO3;DARS;MRPS25;RPL28;FMR1;TNRC6A;NCL;EIF2B3;DNAJC24;EIF5;EIF4E3;IMPACT;PUS7;LSM14B;MAGOH;CNOT6;CARS;HNRNPD;RPLP0;EIF3A;CAPRIN2;LARP4B;RPS27L;DDX1;CIRBP;KARS;NCK1;FAM129A;RPL8;GAPDH;EIF3M;EIF2B1;CDC123;GTPBP2;MTG1;DDX3X;DHX29;RRBP1…	negative regulation of synapse assembly	2	0.0266601	TLR2;ROBO2
regulation of Fc receptor mediated stimulatory signaling pathway	1	0.0210754	CD226	chromosome	145	3.30019e-05	HJURP;IK;CENPU;PCGF5;HNRNPU;ORC1;EZH2;BRD9;CHAF1A;BRMS1L;TTN;POLE4;TTK;MCM6;RFC5;NCOA3;SPC25;ACTR5;HTRA2;PHF12;CCDC137;BUB1;SAP130;ETV3;CD3EAP;ZNF207;UVSSA;ARPC4;DCTN5;NIPBL;SMARCD2;HIST1H4G;SUMO3;APTX;LLPH;MEN1;HNRNPC;PADI2;THOC3;TOP2A;PHF2;WAS;HIST2H2AC;KLHDC3;MCMBP;NR1H4;HMGB1;MAD2L1;PSEN2;FBXO11;KIF18A;PRPF4B;CBX1;REPIN1;COPS5;CDK9;CDK1;POLG2;RAD17;APEX1;CHRAC1;CTCF;PWP1;CHEK2;DYNLL1;NEDD4;CH…	extracellular matrix organization	4	0.020379	FMOD;CTSK;SOX9;ITGA2	anion channel activity	16	0.0165044	ANO5;GABRR2;BEST2;GLRA1;GABRB1;GABRE;ANO2;NMUR2;GABRB3;GABRP;GLRA3;LRRC18;GABRQ;GABRA3;CCT8L2;LRRC8E	translation initiation factor activity	19	1.5799e-05	EIF2S2;EIF4G3;EIF2S3;EIF1;EIF2B3;EIF5;EIF4E3;EIF3A;EIF3M;EIF2B1;DHX29;EIF6;EIF2B4;AGO2;EIF3K;EIF4A1;EIF4G2;EIF3H;EIF2B5	G protein-coupled glutamate receptor signaling pathway	3	0.027234	GRM6;GRIK3;GRM5
regulation of serine-type endopeptidase activity	1	0.0210754	ANXA8	protein transport	254	3.46323e-05	SRP14;RNF31;SCRIB;RBM15B;PDCD6;SRSF11;COPB1;TBC1D22B;DHRS4;RPL21;APBA3;ZDHHC17;RPL10;ARF1;RPLP2;BET1L;RPL37A;BBS7;YWHAB;ACOX1;MAPK1;TLK1;HNRNPU;PEX10;U2AF2;RANBP2;USP50;GSK3B;TRIM3;SRP9;RPS7;RAB9B;KPNB1;VPS37A;BLOC1S3;PEX26;SEC24D;SYVN1;TLR1;CHCHD4;SRSF3;RPL30;LYPLA1;CTDSPL2;FAM3D;RPS15A;ATP6V1H;ARF5;PMM2;RPS3A;TTN;KPNA4;ARIH2;MAGOH;ARRDC4;ARG2;SNX7;UPF2;HTRA2;HSPD1;MCU;ARFIP2;TMED4;HRAS;CCL3;RPL…	lipid binding	6	0.0203852	PCTP;ANXA8L1;APOL4;F3;ARHGAP33;UCP1	sarcoplasmic reticulum calcium ion transport	8	0.0173683	CCL3;TRDN;RYR1;ANK2;DHRS7C;METTL21C;RYR2;CALM1	positive regulation of macromolecule biosynthetic process	310	1.61758e-05	MED31;SMYD3;JADE1;MIF4GD;SERTAD3;ACTR3;ERCC2;UBTF;LRP5L;SIX4;TIRAP;AGT;FZD8;PWP1;PHF10;SMARCD2;ICE2;POT1;SOX9;PATZ1;TAF6L;PF4;RLF;HIVEP3;ZNF345;ASF1A;HOXC10;SOX4;UPF3A;NFYB;MAGED1;FOXO3;STK16;UBE2L3;BCL9;CHEK2;HMGN1;RFC3;CBFB;ERLIN2;ARID1A;ZNF496;KLF13;PLCB1;FMR1;ETV6;NCL;PRKD1;HSP90AA1;SQSTM1;DDRGK1;NCOA6;DDIT3;GAL;MLLT3;EGLN1;E2F3;IMPACT;CCAR1;PKNOX1;DR1;HEXB;ZNF639;GMEB1;TAF10;ACVR1;HOXC6;PAXI…	response to potassium ion	3	0.027234	SLC26A5;CYP11B1;CYP11B2
regulation of serine-type peptidase activity	1	0.0210754	ANXA8	cellular protein-containing complex assembly	152	3.63963e-05	EPS8;PFDN6;HJURP;EIF5;RPL10;CCNH;BOP1;CENPU;ARF1;EIF3B;MSRB1;ATXN2L;FKBP1A;CNOT6;BRD2;USP50;RBM5;EIF2AK2;SEC24D;CHAF1A;TTN;RNF4;HSPD1;TTC19;NDUFS6;HLA-DMB;TXNL4A;DICER1;SF1;PRPF6;PSMD9;NUDT21;SCAF11;MPV17L2;SNRNP200;RPS14;ERCC2;ZNF207;SPTB;ARPC4;LSM14A;ATAT1;HIST1H4G;NDUFA6;RPL6;PSMG2;ABT1;WAS;ARF6;SNRPG;TPPP3;NDUFAF4;PFN1;RPS3;CAPZA1;HMGB1;RPS15;CTAGE1;NAP1L4;CENPJ;EIF3L;ATXN2;CLTC;SNRPB;RASA1;E…	response to mycotoxin	1	0.0208703	BAK1	negative regulation of synaptic transmission, GABAergic	3	0.0175854	SLC6A1;NPY5R;STXBP1	nucleobase-containing compound kinase activity	18	1.64246e-05	ADK;N4BP2;UCKL1;NME4;NME9;UCK1;TK2;AK7;DLG2;NME1;NOL9;CMPK2;AK4;AK3;TK1;GUK1;DTYMK;SUCLG1	phospholipase C-activating G protein-coupled receptor signaling pathway	9	0.0280938	GPR32;LHCGR;OPRM1;GRM5;DRD5;CMKLR1;NMUR2;HTR2A;TGM2
interneuron migration from the subpallium to the cortex	1	0.0210754	ARX	cellular response to stress	245	3.88017e-05	SLC25A24;RNF139;MAGI3;PDCD6;BAG5;VRK2;DHFR;MUTYH;ATRIP;CCNH;HSPA9;GBA;TIRAP;CTSV;MAPK1;TLK1;CNOT6;GSK3B;EIF2AK2;SYVN1;EZH2;TMEM33;CHAF1A;NUDT16L1;RCHY1;GPS1;TRPM2;ARG2;XIAP;TRIB1;RFC5;JKAMP;ACTR5;HTRA2;HSPD1;GAP43;HRAS;DNAJB9;PIDD1;BTRC;PLAGL1;TIPRL;GFRAL;GEN1;ERCC2;UVSSA;FBXO45;SRPRB;EEF2;NIPBL;PLEKHA1;P4HB;DNAJB11;TMEM67;SOD1;CLSPN;BAD;APTX;FOXRED2;MEN1;POLR2J;HSP90B1;ATXN3;COPS6;TOP2A;DNAJB6;N…	activation of cysteine-type endopeptidase activity involved in apoptotic process by cytochrome c	1	0.0208703	BAK1	cellular response to magnesium ion	3	0.0175854	SLFN14;KCNA1;RYR3	proximal promoter sequence-specific DNA binding	106	1.6472e-05	SMYD3;UBTF;SIX4;SMARCD2;LRRFIP1;SOX9;PATZ1;SOX4;BATF3;GZF1;FOXO3;BHLHE40;KLF13;ETV6;NONO;MXD1;RBBP4;DDIT3;PRDM5;E2F3;ZNF639;GMEB1;SSBP4;TXK;PPARA;SMAD2;ETV4;SMAD1;NRF1;PPARG;KLF7;GMEB2;KLF10;DMRT1;HOXB2;UHRF1;NCOA2;JUN;NKRF;TOX3;SNAI2;SMAD5;HOXC11;ZNF239;NFE2L3;SAFB;PRDM1;ZBTB14;TOP1;TFCP2;ATOH8;JUND;EBF2;MEF2A;ESR2;MBD3;NR4A2;HLTF;HES1;MYOCD;STAT5B;CREB1;NR3C1;HNRNPU;MSGN1;DHX9;CLOCK;CDK9;USP3;N…	ligand-gated calcium channel activity	4	0.0308962	RYR3;GRIN2B;GRIN2A;JPH3
interleukin-23-mediated signaling pathway	1	0.0210754	JAK2	chromatin organization	111	4.17564e-05	HJURP;CENPU;PCGF5;TLK1;HNRNPU;BRD2;SAFB;EZH2;BRD9;CHAF1A;BRMS1L;POLE4;NCOA3;KMT2B;RCBTB1;PRDM4;MBTD1;C6orf89;UBE2E1;HIRIP3;NTMT1;NIPBL;SMARCD2;HIST1H4G;IWS1;PADI1;FOXA1;KDM5B;JADE1;MEN1;HNRNPC;KMT2D;PADI2;ATXN3;HLTF;PHF2;HIST2H2AC;ZNF451;IGF2;NR1H4;PRKD1;PYGO2;PCGF6;HMGB1;ENY2;PCGF1;GCG;NAP1L4;TAF6L;CDK9;APOBEC1;CDK1;CHRAC1;CTCF;PWP1;HIST1H1C;RNF8;BAG6;RNF168;CENPT;PRDM5;GATAD1;DPPA3;MIER1;MSL1;P…	adenylate cyclase-activating adrenergic receptor signaling pathway involved in heart process	1	0.0208703	AKAP13	extrinsic component of postsynaptic specialization membrane	3	0.0175854	SCRIB;TIAM1;DGKI	nucleoside-triphosphatase regulator activity	76	1.90735e-05	GDI1;RALGDS;TBC1D25;TBC1D22B;RGS1;PFN1;STARD13;ATP1B1;TBC1D10B;ACAP2;PLCB1;ARHGDIB;FAM13A;ARHGAP18;DNAJC24;ARHGAP20;OCRL;ARHGAP21;BNIP2;ARHGAP33;SRGAP2;DNAJA2;ARFGAP2;RAPGEF2;TBC1D19;ELMOD1;ARHGAP12;ARHGAP1;RABGAP1L;TBC1D4;AGFG1;RANBP1;ARHGAP4;ARFGAP3;RUNDC3A;SIPA1L1;JUN;TBC1D15;ARAP3;DEPDC5;ARHGAP26;ARHGAP11B;ARHGEF6;IQGAP1;ARHGAP10;ARHGAP29;GNB5;WAS;CDC42SE1;DNAJB1;BAG4;TRIP10;ECT2;BAG2;RTKN;TB…	negative regulation of synaptic transmission	7	0.0321002	TNR;ADCY8;GRIK3;DRD5;SORCS3;NPY5R;HTR2A
cerebral cortex tangential migration	1	0.0210754	ARX	nucleoplasm part	153	4.54327e-05	HINT1;CDC34;RBM15B;SRSF11;CCNT1;IK;MED31;CCNH;STK35;DRG1;PTK6;HNRNPU;ATXN2L;RAPH1;BRD2;U2AF2;CLK2;EZH2;SRSF3;BRMS1L;SMNDC1;IL15;RCHY1;POLE4;MAGOH;DUSP11;RNF4;KMT2B;ANGEL2;RBM39;PRDM4;GNL3;MED4;TAF13;SF1;PRPF6;PAPOLG;PLAGL1;PHF12;LAGE3;NUDT21;SCAF11;SAP130;ETV3;ERCC2;SNAPC5;ZC3H14;IL16;SUMO3;NCOA2;KDM5B;JADE1;MEN1;POLR2J;KMT2D;THOC3;ZNF451;PNN;ENY2;POLR2I;RBM11;PRPF4B;TAF6L;IMPAD1;CDK9;PIP5K1A;FAN…	post-embryonic camera-type eye development	1	0.0208703	BAK1	ligand-gated calcium channel activity	7	0.0177468	GRIN2B;GRIN2A;RYR1;RYR3;TRPM2;RYR2;JPH3	regulation of hydrolase activity	220	2.03073e-05	IGBP1;XIAP;FKBP1A;EIF2AK2;PPP2R1B;LPL;GDI1;AGT;LRCH1;TBC1D25;RSU1;PRDX5;TBC1D22B;TERF2;RGS1;POT1;PFN1;TIPRL;STARD13;BIRC5;ATP1B1;TBC1D10B;USP47;CST6;ACAP2;PLCB1;GPATCH2;ARHGDIB;PDCD6;FAM13A;DOCK10;ARHGAP18;PRKD1;PPP2R3A;DNAJC24;EIF5;FARP1;DDRGK1;PLCG1;ARHGAP20;OCRL;PCOLCE;EGLN1;MAP2;ARHGAP21;F3;BNIP2;EPHA4;ARHGAP33;SRGAP2;DNAJA2;NDE1;CASP3;TXK;CSTB;APC2;DYNLL1;ARFGAP2;RAPGEF2;RPS27L;SORL1;ANTXR1;…	outward rectifier potassium channel activity	3	0.0324283	KCNT2;KCNK18;KCNT1
olfactory bulb interneuron development	1	0.0210754	ARX	ubiquitin ligase complex	50	4.69426e-05	RNF31;PDCD6;MED31;FBXW5;PCGF5;SYVN1;PHC3;RCHY1;ARIH2;CKS2;BTRC;UBE2E1;FBXO45;RNF144B;ASB2;RBCK1;TRIM21;CUL2;USP47;PCGF6;PCGF1;FBXO11;CDC16;KLHL12;HSPA8;MED21;OS9;NEDD4;CDC26;UBE2S;RNF8;DCAF11;FBXO25;RNF168;UBE2L3;RNF19B;ANAPC4;ERCC8;VHL;UBE2C;FBXO24;MAD2L2;DYRK2;CDKN1B;KLHL2;GLMN;CUL4B;CBX2;ARIH1;FBXO9	positive regulation of IRE1-mediated unfolded protein response	1	0.0208703	BAK1	regulation of calcium-mediated signaling	17	0.0177768	PLEK;CCL4L1;CCL3;C10orf71;CMKLR1;MYOZ2;TRDN;CHP2;CAMTA1;CDH13;NRG1;GSK3B;PTBP1;JPH3;P2RX3;LMCD1;CALM1	nucleotide phosphorylation	29	2.09313e-05	ALDOA;NME4;NME9;P2RX7;ENO3;PGK1;PPARA;ENO2;AK7;GAPDH;ZBTB20;NME1;EIF6;ENO4;CMPK2;GALK1;PRKAG2;AK4;PGAM1;GUK1;ADPGK;HDAC4;PFKFB1;FBP1;DTYMK;ENO1;SUCLG1;INSR;ECD	antibiotic catabolic process	6	0.0330187	TPO;PXDNL;HBG1;LPO;MPO;UGT1A1
fascia adherens	1	0.0210754	ACTN1	Nucleotide excision repair	15	4.91255e-05	CCNH;POLE4;RFC5;ERCC2;BIVM-ERCC5;PCNA;ERCC6;ERCC8;RFC4;POLD4;CUL4B;RFC3;GTF2H1;POLD1;ERCC5	anterior head development	1	0.0208703	SOX9	regulation of ERK1 and ERK2 cascade	44	0.0182732	FGF2;PDGFD;CCL4L1;MARCO;HTR2A;CCL3;ADIPOQ;FGA;SLAMF1;CCL18;FGF23;PHB;HMGB1;EPHB1;TIAM1;BMP2;OPRM1;CCL7;FGG;PDGFC;CCL8;CCL11;CCL2;NTRK3;HRAS;FGB;BTN2A2;NPY5R;DDT;CCL1;CCL13;ALK;CCL17;RRAS;FGF10;FLCN;FGF4;ROS1;S100A7;ARHGAP8;PTPN1;TGFB1;C5AR1;PRMT5	positive regulation of cellular biosynthetic process	323	2.16631e-05	MED31;SMYD3;JADE1;MIF4GD;SERTAD3;ACTR3;ERCC2;UBTF;LRP5L;SIX4;TIRAP;AGT;FZD8;PWP1;PHF10;SMARCD2;ICE2;POT1;SOX9;PATZ1;DDAH1;TAF6L;PF4;RLF;HIVEP3;ZNF345;ASF1A;HOXC10;SOX4;UPF3A;NFYB;MAGED1;FOXO3;STK16;UBE2L3;BCL9;CHEK2;HMGN1;RFC3;CBFB;ERLIN2;ARID1A;ZNF496;KLF13;PLCB1;FMR1;ETV6;NCL;PRKD1;P2RX7;HSP90AA1;SQSTM1;DDRGK1;NCOA6;DDIT3;GAL;MLLT3;EGLN1;E2F3;IMPACT;CCAR1;PKNOX1;DR1;HEXB;ZNF639;GMEB1;TAF10;ACVR…	intrinsic component of postsynaptic density membrane	6	0.0330187	GRIN2A;CACNG2;SORCS3;CACNG3;GRIK5;DCC
structural constituent of postsynapse	1	0.0210754	ACTN1	peptidyl-arginine modification	11	5.83822e-05	PRDM4;PADI1;PADI2;ART1;NR1H4;FBXO11;COPRS;PRMT8;PADI3;PADI4;PRMT6	regulation of sarcomere organization	1	0.0208703	AKAP13	synaptic vesicle localization	26	0.0189856	CHRNB2;WNT7A;GRIK5;SCRIB;HTR2A;PRKCB;MAGI2;SYT11;AP3B2;AP3D1;KIF5A;CHRNA4;DGKI;SYT8;ARF1;GSK3B;CNR1;SNAP25;SYT5;BRSK1;STXBP1;SYT17;TOR1A;SNAP23;CADPS;CALM1	peptide biosynthetic process	124	2.23279e-05	MIF4GD;MRPL28;EIF2AK2;MRPL44;MRPL46;EIF2S2;RPL13;MRPS18A;SECISBP2L;RNF139;MRPS10;RPL10;GFM2;EIF4G3;DPH7;EIF2S3;MRPL17;IGF2BP2;SOX4;CNOT10;UPF3A;LARS2;MEX3D;SRP9;EIF1;FOXO3;DARS;MRPS25;RPL28;FMR1;TNRC6A;NCL;EIF2B3;DNAJC24;EIF5;EIF4E3;IMPACT;PUS7;LSM14B;MAGOH;CNOT6;CARS;HNRNPD;RPLP0;EIF3A;CAPRIN2;LARP4B;RPS27L;DDX1;CIRBP;KARS;NCK1;FAM129A;RPL8;GAPDH;EIF3M;EIF2B1;CDC123;GTPBP2;MTG1;DDX3X;DHX29;RRBP1…	calcium activated cation channel activity	4	0.0348082	CATSPER2;KCNK18;TMEM63C;CATSPER1
haptoglobin binding	1	0.0210754	HBZ	ubiquitin-like protein ligase binding	53	6.37972e-05	RNF31;BAG5;HSPA9;GSK3B;CCDC50;TRIB1;NAE1;JKAMP;HSPD1;TUBB;YWHAZ;SLC25A5;ATXN3;HLTF;CUL2;HGS;HSPA8;ZNF746;USP19;UBXN1;PCBP2;ERLIN1;CHEK2;RNF8;BAG6;DDRGK1;JUN;SUMO2;MFN2;CACYBP;UBE2L3;TPI1;MOAP1;PRKAR2A;LRPPRC;UQCRC1;CDK5RAP3;UBE2C;SMG5;RANGAP1;SUMO1;FZD4;TMBIM6;UBE2K;GLMN;CUL4B;FZD8;ARRDC1;PRKACA;SNCAIP;PYHIN1;DERL1;ARIH1	positive regulation of transmission of nerve impulse	1	0.0208703	ITGA2	phospholipase C-activating G protein-coupled receptor signaling pathway	17	0.0195778	HTR2A;FPR1;ADRA1B;CMKLR1;HCRTR2;FPR3;GPR32;OPRM1;NMUR2;CCKBR;LHCGR;GNA15;GPR4;CX3CR1;HRH1;CASR;C5AR1	cellular metabolic compound salvage	15	2.30831e-05	ADK;ADAL;APIP;UCKL1;HDDC2;APRT;PNP;GMPR2;UCK1;TK2;ADI1;NAPRT;TK1;CDA;UPP1	regulation of presynaptic membrane potential	2	0.0362291	KCNA1;GRIK3
Amoebiasis	2	0.0216306	SERPINB3;ACTN1	peptide transport	256	6.41432e-05	SRP14;RNF31;SCRIB;RBM15B;PDCD6;SRSF11;COPB1;TBC1D22B;DHRS4;RPL21;APBA3;ZDHHC17;RPL10;ARF1;RPLP2;BET1L;RPL37A;BBS7;YWHAB;ACOX1;MAPK1;TLK1;HNRNPU;PEX10;U2AF2;RANBP2;USP50;GSK3B;TRIM3;SRP9;RPS7;RAB9B;KPNB1;VPS37A;BLOC1S3;PEX26;SEC24D;SYVN1;TLR1;CHCHD4;SRSF3;RPL30;LYPLA1;CTDSPL2;FAM3D;RPS15A;ATP6V1H;ARF5;PMM2;RPS3A;TTN;KPNA4;ARIH2;MAGOH;ARRDC4;ARG2;SNX7;UPF2;HTRA2;HSPD1;MCU;ARFIP2;TMED4;HRAS;CCL3;AIM…	negative regulation of serine-type endopeptidase activity	1	0.0208703	ANXA8L1	calcium:cation antiporter activity	4	0.0210574	SLC8A3;SLC24A1;SLC24A5;SLC24A2	modification-dependent protein catabolic process	117	2.36907e-05	BBS7;RNF217;RNF139;ATE1;UBE2A;TOM1L1;CDC34;USP18;TRIM25;FBXL4;PCYOX1;UBE2L3;RNF103;KCTD10;USP47;ERLIN2;N4BP1;USP11;DNAJB9;SQSTM1;DDRGK1;ITCH;DDIT3;STYX;AURKA;ANKZF1;NEDD4;USP45;USP12;RNF187;FBXW4;CUL9;GBA;CHFR;ZFAND2B;KEAP1;RNF150;FBXL12;RNF4;CBLC;UBE2I;FBXO2;TBL1XR1;UBE2K;MDM2;FBXL5;GSK3B;BIRC6;NPLOC4;FHIT;UBA6;UHRF1;UBR2;PTTG1;FBXO33;ANAPC4;UBQLN2;ZNRF3;RCHY1;RPS7;USP51;PTPN23;RNF168;HUWE1;KLHL…	synaptic transmission, glycinergic	2	0.0362291	GLRA1;SLC6A9
cellular oxidant detoxification	2	0.0220533	GSTA1;HBZ	nuclear-transcribed mRNA catabolic process	40	6.98767e-05	RPL21;RPL10;RPLP2;RPL37A;CNOT6;RPS7;RPL30;RPS15A;RPS3A;MAGOH;UPF2;PNRC2;RPL35;RPS8;RPL8;RPLP1;RPS14;RPL6;RPL37;RPL31;RPS11;SAMD4A;RPS3;RPS15;DDX5;MTPAP;RPL13;RPSA;CNOT1;SMG5;RPLP0;RPS2;EIF3E;RPS12;EXOSC7;RPL22;RPL18A;RPL10A;RPL4;RPS16	negative regulation of serine-type peptidase activity	1	0.0208703	ANXA8L1	intrinsic component of postsynaptic density membrane	11	0.021273	GRIK5;DCC;CACNG3;PTPRO;GRIN2A;CACNG2;CHRM3;GRID1;LRRC4B;SORCS3;EFNB3	ubiquitin-dependent protein catabolic process	116	2.38582e-05	BBS7;RNF217;RNF139;ATE1;UBE2A;TOM1L1;CDC34;USP18;TRIM25;FBXL4;UBE2L3;RNF103;KCTD10;USP47;ERLIN2;N4BP1;USP11;DNAJB9;SQSTM1;DDRGK1;ITCH;DDIT3;STYX;AURKA;ANKZF1;NEDD4;USP45;USP12;RNF187;FBXW4;CUL9;GBA;CHFR;ZFAND2B;KEAP1;RNF150;FBXL12;RNF4;CBLC;UBE2I;FBXO2;TBL1XR1;UBE2K;MDM2;FBXL5;GSK3B;BIRC6;NPLOC4;FHIT;UBA6;UHRF1;UBR2;PTTG1;FBXO33;ANAPC4;UBQLN2;ZNRF3;RCHY1;RPS7;USP51;PTPN23;RNF168;HUWE1;KLHL25;USP3…	adenylate cyclase-inhibiting G protein-coupled glutamate receptor signaling pathway	2	0.0362291	GRM6;GRIK3
positive regulation of glomerulus development	1	0.0233901	SERPINB7	heterocycle catabolic process	92	7.50143e-05	HINT1;NT5M;SLIRP;RPL21;HNRNPA0;RPL10;RPLP2;RPL37A;TIRAP;YWHAB;HNRNPU;CNOT6;RPS7;KPNB1;RPL30;RPS15A;RPS3A;MAGOH;ENTPD7;UPF2;ST20;ANGEL2;DICER1;PNRC2;RPL35;RPS8;GEN1;RPL8;RPLP1;ENO3;RPS14;ZC3H14;YBX1;YWHAZ;RPL6;RPL37;HNRNPC;RPL31;ADAL;RPS11;GPX1;JMJD8;SAMD4A;APAF1;RPS3;PGK1;PNP;HMGB1;RPS15;NUDT15;HSPA8;APOBEC1;KHSRP;DDX5;APEX1;ENTPD8;MTPAP;MAPK14;RPL13;RNASET2;RPSA;TPI1;PDE5A;LRPPRC;SLFN14;CNOT1;AL…	cerebral cortex GABAergic interneuron development	1	0.0208703	ARX	regulation of signaling receptor activity	72	0.0242509	WNT7A;FGF2;FAM3D;VSTM1;PDGFD;FGF6;BMP10;NTF3;NCOA3;CCL4L1;IL17A;IL7;CCL3;ADIPOQ;CCL18;CACNG3;GDF3;SLURP1;FGF23;CLEC12B;CACNG2;FCGR2B;TSHB;VIP;FAM19A5;HMGB1;BMP2;GPHB5;OPRM1;CCL7;TSLP;PDGFC;IL21;CCL8;CCL11;NGF;IGF2;MANF;TNFSF14;CRH;COPA;CCL2;AIMP1;FGF14;GIP;IFNA14;CCL1;ADM2;CD40LG;CCL13;GREM2;NRG1;CCL17;FGF10;INSL4;FGF4;IL3;IL22;WNT3A;IFNA4;SHANK1;INSL6;IL16;NPTX2;NPTX1;SCG2;IL15;BUD31;IL17F;MUC4;…	cellular amide metabolic process	187	2.54724e-05	MIF4GD;MRPL28;ATIC;EIF2AK2;SEC11C;MRPL44;MRPL46;ECE1;EIF2S2;RPL13;MRPS18A;SECISBP2L;RNF139;MRPS10;RPL10;GFM2;EIF4G3;DPH7;EIF2S3;MRPL17;PMVK;IGF2BP2;SOX4;CNOT10;UPF3A;LARS2;MEX3D;SRP9;SLC25A1;EIF1;FOXO3;B4GALT3;DARS;MRPS25;RPL28;FMR1;TNRC6A;NCL;P2RX7;HSP90AA1;EIF2B3;DNAJC24;EIF5;G6PD;ASNS;B4GALT6;EIF4E3;IMPACT;AADAT;HEXB;PUS7;LSM14B;MAGOH;EPHA4;CNOT6;CARS;DLAT;HNRNPD;CASP3;NSMAF;CERS2;RPLP0;EIF3A;…	Tofacitinib	2	0.0362291	JAK2;CYP2C19
positive regulation of cysteine-type endopeptidase activity involved in apoptotic signaling pathway	1	0.0233901	JAK2	mitochondrial part	143	7.71308e-05	SLC25A24;PEBP1;NT5M;VRK2;DTYMK;UQCRFS1;HSPA9;FAHD1;MCUR1;SLC25A53;SDHC;CHCHD4;MRPS25;FKBP8;CYC1;GLRX5;ARG2;MRPL28;AURKAIP1;MTHFD2;HTRA2;HSPD1;TTC19;UQCR11;NDUFS6;MCU;MRPL37;CHCHD5;SLC25A10;AGPAT4;MPV17L2;RNF144B;SLC25A30;NDUFA4;SLC25A5;UQCRH;NDUFA6;ACADSB;SOD1;BAD;SLC25A3;IMMT;MRPL9;MMAB;MRPL51;HYKK;PPP2R2B;ATXN3;SLC25A44;MTG1;GPX1;THOP1;SLC25A43;ACSM4;NDUFAF4;RPS3;ACSM1;MRPL24;TRMT10C;SLC11A2;CD…	regulation of epithelial cell proliferation involved in lung morphogenesis	1	0.0208703	SOX9	regulation of calcineurin-mediated signaling	8	0.0244632	C10orf71;MYOZ2;CHP2;CAMTA1;NRG1;GSK3B;PTBP1;LMCD1	nucleoside triphosphate biosynthetic process	38	2.70381e-05	ADK;ALDOA;UCKL1;CTPS2;NME4;NME9;P2RX7;ENO3;PGK1;PPARA;UCK1;ENO2;AK7;GAPDH;ZBTB20;SLC25A12;NME1;EIF6;LDHC;ENO4;CMPK2;GALK1;PRKAG2;AK4;SLC25A13;PGAM1;CYC1;ADPGK;HDAC4;PFKFB1;FBP1;DTYMK;PID1;ENO1;SUCLG1;DNAJC30;INSR;ECD	hormone biosynthetic process	8	0.0364557	CYP21A2;HSD3B2;CYP11B1;TPO;MED1;HSD17B7;CYP11B2;SLC5A7
vagina development	1	0.0233901	BAK1	telomerase holoenzyme complex	9	7.89253e-05	HNRNPU;HNRNPC;SNRPB;GAR1;PTGES3;NOP10;SNRPD3;SMG5;LSM11	otic vesicle formation	1	0.0208703	SOX9	positive regulation of calcium ion transmembrane transporter activity	8	0.0244632	TRDN;ANK2;PLCG2;FGF14;KCNE2;STAC;RYR2;CALM1	magnesium ion binding	51	2.79105e-05	CDC42BPA;MAP3K8;PRPSAP2;FIGNL1;WEE1;MAST2;XYLT2;PDCD6;RNASEH1;NUDT16;ENO3;SIK2;IDH3G;NT5C1B-RDH14;ENO2;PRPS1;MTHFD2;GEN1;NME1;MARK1;ATP11B;RPS6KA6;ATP9B;ATP11A;ATP10D;MAP3K5;PI4K2A;SNRK;ATP11C;PPA1;ENO4;RPS6KA5;ATP9A;MSH6;ABL2;XXYLT1;STK26;GLUL;PRPSAP1;PRKACA;STK38L;DXO;FAN1;DYRK3;ENOSF1;ENO1;ADSS;ICK;CDK2;OXSR1;IMPA1	inhibitory postsynaptic potential	3	0.0380995	NPAS4;GLRA1;IGSF9B
glomerular mesangial cell proliferation	1	0.0233901	SERPINB7	cellular nitrogen compound catabolic process	92	7.97981e-05	HINT1;NT5M;SLIRP;RPL21;HNRNPA0;RPL10;RPLP2;RPL37A;TIRAP;YWHAB;HNRNPU;CNOT6;RPS7;KPNB1;RPL30;RPS15A;RPS3A;MAGOH;ENTPD7;UPF2;ST20;ANGEL2;DICER1;PNRC2;RPL35;RPS8;GEN1;RPL8;RPLP1;ENO3;RPS14;ZC3H14;YBX1;YWHAZ;RPL6;RPL37;HNRNPC;RPL31;ADAL;RPS11;GPX1;JMJD8;SAMD4A;APAF1;RPS3;PGK1;PNP;HMGB1;RPS15;NUDT15;HSPA8;APOBEC1;KHSRP;DDX5;DMGDH;APEX1;ENTPD8;MTPAP;MAPK14;RPL13;RNASET2;RPSA;TPI1;PDE5A;LRPPRC;SLFN14;CN…	lacrimal gland development	1	0.0208703	SOX9	calcium ion regulated exocytosis	24	0.0245564	CHRNB2;WNT7A;GRIK5;SCRIB;HTR2A;VAMP3;PRKCB;SYT11;CHRNA4;DGKI;SYT8;ARF1;EQTN;GSK3B;CNR1;SNAP25;SYT5;CACNA1I;STXBP1;SYT17;CACNA1H;SNAP23;CADPS;CALM1	identical protein binding	288	3.27472e-05	DYNLT3;XIAP;ATIC;EIF2AK2;FKBP8;CDC42BPA;TLE1;TIRAP;BCHE;FTH1;ECE1;ALDOA;PTS;ST13;APIP;TERF2;ESYT2;CTPS2;LRRFIP1;TSTA3;KCNK1;TRIM8;OXCT1;CDADC1;TTK;BIRC5;PTPRM;P2RX2;MAGED1;PEX7;BHLHE40;CHEK2;PAFAH1B2;CISD1;PLCB1;DCTD;FMR1;NONO;NCL;DROSHA;PDCD6;ERCC5;PRKD1;P2RX7;HSP90AA1;SQSTM1;ZDHHC17;NUDT16L1;MTMR1;G6PD;NUDT16;DDIT3;ABCD3;ASNS;KHDRBS3;SEH1L;DRG1;AADAT;HEXB;HSBP1;KCTD11;ACVR1;FOXP1;MICALL1;ABCB9;…	calcium ion transmembrane transport	20	0.039892	CATSPER2;TRPC5;RYR3;GRIN2B;GRIN2A;OPRM1;BHLHA15;CACNG2;METTL21C;JPH3;UBASH3B;CAPN3;ATP2B2;FGF14;CACNG3;NALCN;ANK2;CACNA1A;HTR2A;CATSPER1
luteinizing hormone secretion	1	0.0233901	TBX3	ribosome biogenesis	50	8.32644e-05	RPL10;BOP1;RPS7;WDR55;HEATR1;GTF3A;BTRC;RPL35;RPS8;MPV17L2;RPS14;TBL3;IMP4;RPL6;ABT1;EMG1;KRR1;RPS15;URB1;MRPL1;PWP1;NUP88;DHX30;FTSJ3;GAR1;RPSA;DDX17;NOP10;NOP56;EIF2A;MTERF3;RPF2;NOC2L;ZNHIT6;SBDS;RPLP0;SHQ1;RPS2;XPO1;PPAN;MTG2;NGDN;EXOSC7;WDR74;TRMT61B;NPM1;RPL10A;BCCIP;UTP3;RPS16	negative regulation of fibroblast apoptotic process	1	0.0208703	CFDP1	regulation of postsynaptic membrane potential	22	0.0255816	CHRNB2;WNT7A;GRIK5;GRIN2B;KCNA1;SLC8A3;GABRR2;GRIN2A;GLRA1;GABRB1;TMEM108;GABRE;OPRM1;GABRB3;GLRA3;CHRNA4;DGKI;FGF14;GABRA3;GSK3B;P2RX3;SHANK1	modification-dependent macromolecule catabolic process	118	3.44234e-05	BBS7;RNF217;RNF139;ATE1;UBE2A;TOM1L1;CDC34;USP18;TRIM25;FBXL4;PCYOX1;UBE2L3;RNF103;KCTD10;USP47;ERLIN2;N4BP1;USP11;DNAJB9;SQSTM1;DDRGK1;ITCH;DDIT3;STYX;AURKA;ANKZF1;NEDD4;USP45;USP12;RNF187;FBXW4;CUL9;GBA;CHFR;ZFAND2B;KEAP1;RNF150;FBXL12;RNF4;CBLC;UBE2I;FBXO2;TBL1XR1;UBE2K;MDM2;FBXL5;GSK3B;BIRC6;NPLOC4;FHIT;UBA6;UHRF1;UBR2;PTTG1;FBXO33;ANAPC4;UBQLN2;ZNRF3;RCHY1;RPS7;USP51;PTPN23;RNF168;HUWE1;KLHL…	voltage-gated calcium channel complex	5	0.0420953	CATSPER2;CACNG2;CACNG3;CACNA1A;CATSPER1
regulation of transforming growth factor beta1 production	1	0.0233901	SERPINB7	chromosomal part	127	9.14393e-05	HJURP;CENPU;HNRNPU;ORC1;EZH2;BRD9;CHAF1A;BRMS1L;POLE4;TTK;MCM6;RFC5;NCOA3;SPC25;ACTR5;HTRA2;PHF12;BUB1;SAP130;ETV3;ZNF207;ARPC4;DCTN5;NIPBL;SMARCD2;HIST1H4G;SUMO3;APTX;MEN1;HNRNPC;PADI2;THOC3;PHF2;WAS;HIST2H2AC;KLHDC3;MCMBP;NR1H4;HMGB1;MAD2L1;PSEN2;KIF18A;CBX1;REPIN1;COPS5;CDK9;CDK1;RAD17;APEX1;CHRAC1;CTCF;CHEK2;DYNLL1;NEDD4;CHMP2A;HIST1H1C;RNF8;RNF168;APPL1;GAR1;JUN;CENPT;NABP2;STAG3;PTGES3;GINS…	zona pellucida receptor complex	1	0.0208703	ZPBP2	transmitter-gated ion channel activity involved in regulation of postsynaptic membrane potential	9	0.026176	CHRNB2;GRIK5;GABRR2;GLRA1;GABRB1;GABRE;GABRB3;CHRNA4;GABRA3	RNA polymerase II regulatory region DNA binding	139	3.49605e-05	SMYD3;SIX4;KLF3;ETV3;SMARCD2;LRRFIP1;SOX9;PATZ1;HOXC10;SOX4;BATF3;NFYB;GZF1;FOXO3;BHLHE40;H3F3A;KLF13;ETV6;NONO;MXD1;RBBP4;SATB1;DDIT3;PRDM5;E2F3;CCAR1;ZNF639;GMEB1;HOXC6;SSBP4;CREM;ZNF131;THRB;TXK;PPARA;SMAD2;ETV4;THRA;SMAD1;NRF1;PPARG;PURB;KLF7;GMEB2;KLF10;ZBTB5;DMRT1;NR1I2;MLX;TAL2;HOXB2;BACH2;NCOA2;NME1;JUN;NKRF;TOX3;SNAI2;PCGF5;SMAD5;HOXC11;ZNF239;NFE2L3;IER2;SAFB;ZC3H8;PRDM1;ZBTB14;TOP1;BCL…	detection of external biotic stimulus	3	0.0442396	TLR2;TREM2;PGLYRP3
positive regulation of response to tumor cell	1	0.0233901	CD226	protein modification by small protein conjugation	115	0.000103732	RNF31;RNF139;CDC34;PDCD6;BAG5;MED31;FBXW5;ZNF598;PCGF5;RNF208;FKBP1A;PEX10;U2AF2;RANBP2;TRIM3;RPS7;BIRC6;MKRN1;SYVN1;RCHY1;ASB15;ARIH2;ARRDC4;XIAP;RNF4;NAE1;GNL3;BTRC;UBE2E1;UVSSA;FBXO45;RNF144B;ASB2;RBCK1;RNF182;SUMO3;WSB1;HLTF;TRIM21;CUL2;UBA6;THOP1;ZNF451;RNF167;RPS3;PCGF6;PCGF1;MAD2L1;FBXO11;SDE2;SIAH3;CDC16;KLHL12;CDK9;MED21;UBXN1;OS9;BCL11A;RNF181;RNF126;NEDD4;CDC26;UBE2S;RNF8;WDSUB1;PHF23;…	myristoyl-CoA hydrolase activity	1	0.0208703	ACOT2	transport vesicle	51	0.0263114	CUZD1;YIPF1;BSN;COPB1;RPH3A;MCTP2;NTF3;PRG2;HLA-DQA2;VAMP3;GRIN2A;DEFA5;SYPL2;SYT11;HLA-DPA1;HLA-DPB1;PCSK2;STX5;NGF;DGKI;HLA-DQA1;HLA-F;GOLGA5;SEC13;COPA;SLC17A6;CNST;SYT8;GOSR2;TRAPPC4;SNCAIP;SEC24D;SNAP25;SYT5;BRSK1;ARCN1;KLHL12;SLC17A5;SYT17;TOR1A;SLC30A8;RAB26;ASTL;HLA-DRA;SLC18A2;NPTX1;SCG3;PTPRN2;PDCD6;CALM1;DBH	protein serine/threonine kinase activity	92	3.80366e-05	ERCC2;EIF2AK2;CDC42BPA;MAP3K8;VRK2;NEK9;CDK17;BUB1;WNK4;TTK;MAST2;PHKA1;STK16;CHEK2;PHKA2;STKLD1;STK35;PRKD1;SQSTM1;ULK2;AURKA;ACVR1;TGFBR2;SIK2;AAK1;CCNH;ERCC3;SRPK3;CDK18;PIM1;STK24;DMPK;GSK3B;LTBP1;MARK1;RIOK1;NRBP2;RPS6KC1;GTF2H1;RPS6KA6;CAB39;AKAP13;MAP3K5;SNRK;ANKK1;TOP1;MAP3K15;PPM1D;STK40;MAPK3;PRKCE;TRPM6;MKNK1;PRKAG2;DAPK2;CDKN1A;MAPKAPK3;RPS6KA5;CSNK2A2;PDIK1L;NEK7;HIPK1;CDK9;STK26;NRB…	cellular response to interferon-gamma	13	0.0458453	JAK2;HLA-DPB1;TLR2;IRF8;IRGM;OTOP1;CCL13;MED1;CCL2;CCL7;CCL1;CCL4L1;CCL11
positive regulation of immune response to tumor cell	1	0.0233901	CD226	aromatic compound catabolic process	93	0.000108356	HINT1;NT5M;SLIRP;RPL21;HNRNPA0;RPL10;RPLP2;RPL37A;TIRAP;YWHAB;HNRNPU;CNOT6;RPS7;KPNB1;RPL30;RPS15A;RPS3A;MAGOH;ENTPD7;UPF2;ST20;ANGEL2;SLC6A3;DICER1;PNRC2;RPL35;RPS8;GEN1;RPL8;RPLP1;ENO3;RPS14;ZC3H14;YBX1;YWHAZ;RPL6;RPL37;HNRNPC;RPL31;ADAL;RPS11;GPX1;JMJD8;SAMD4A;APAF1;RPS3;PGK1;PNP;HMGB1;RPS15;NUDT15;HSPA8;APOBEC1;KHSRP;DDX5;APEX1;ENTPD8;MTPAP;MAPK14;RPL13;RNASET2;RPSA;TPI1;PDE5A;LRPPRC;SLFN14;C…	cell-matrix adhesion mediator activity	1	0.0208703	ITGA2	synaptic vesicle transport	24	0.0263549	CHRNB2;WNT7A;GRIK5;SCRIB;HTR2A;PRKCB;SYT11;AP3B2;AP3D1;KIF5A;CHRNA4;DGKI;SYT8;ARF1;GSK3B;CNR1;SNAP25;SYT5;STXBP1;SYT17;TOR1A;SNAP23;CADPS;CALM1	organonitrogen compound catabolic process	218	3.80967e-05	HINT1;ADAL;BBS7;RNF217;ECE1;NT5M;RNF139;ATE1;UBE2A;TOM1L1;CHDH;SOX9;CDC34;DDAH1;TXN2;USP18;NEIL2;CDADC1;TRIM25;FBXL4;PCYOX1;UBE2L3;RNF103;KCTD10;CHEK2;USP47;ERLIN2;N4BP1;USP11;DNAJB9;FMR1;P2RX7;HSP90AA1;SQSTM1;DDRGK1;ITCH;NUDT16;DDIT3;EGLN1;PTTG1IP;STYX;AURKA;AADAT;ANKZF1;HEXB;NEDD4;USP45;EPHA4;USP12;RNF187;FBXW4;ENTPD4;SH3D19;CYP2D6;NUDT11;FMOD;CUL9;AMER1;APC2;PNP;GBA;AP2B1;UGGT1;CHFR;ZFAND2B;SO…	excitatory chemical synaptic transmission	2	0.0468938	GRIN2B;GRIN2A
positive regulation of double-strand break repair via nonhomologous end joining	1	0.0233901	SMCHD1	organelle inner membrane	80	0.000122558	SLC25A24;UQCRFS1;MCUR1;SLC25A53;SDHC;MRPS25;CYC1;MRPL28;AURKAIP1;HSPD1;TTC19;UQCR11;NDUFS6;MCU;MRPL37;SLC25A10;MPV17L2;SLC25A30;KCNH1;LMNB2;NDUFA4;SLC25A5;UQCRH;NDUFA6;SLC25A3;IMMT;MRPL9;MRPL51;SLC25A44;MTG1;SLC25A43;NDUFAF4;RPS3;MRPL24;PSEN2;GOT2;MICU3;SLC25A14;MRPL1;DUSP18;GHITM;NDUFV2;NDUFB9;TIMM10B;COX15;MRPL38;BCS1L;NUTF2;UQCRC2;MRPS26;NDUFS7;PMPCA;SLC25A36;LRPPRC;MRPS21;SLC25A22;SFXN4;UQCRC…	cAMP-dependent protein kinase activity	1	0.0208703	AKAP13	establishment of synaptic vesicle localization	24	0.0263549	CHRNB2;WNT7A;GRIK5;SCRIB;HTR2A;PRKCB;SYT11;AP3B2;AP3D1;KIF5A;CHRNA4;DGKI;SYT8;ARF1;GSK3B;CNR1;SNAP25;SYT5;STXBP1;SYT17;TOR1A;SNAP23;CADPS;CALM1	nucleoside diphosphate phosphorylation	28	3.82883e-05	ALDOA;NME4;NME9;P2RX7;ENO3;PGK1;PPARA;ENO2;AK7;GAPDH;ZBTB20;NME1;EIF6;ENO4;CMPK2;GALK1;PRKAG2;AK4;PGAM1;ADPGK;HDAC4;PFKFB1;FBP1;DTYMK;ENO1;SUCLG1;INSR;ECD	sodium ion binding	2	0.0468938	TDG;CAPN3
X chromosome	1	0.0233901	SMCHD1	nucleotide-excision repair	25	0.000123525	CCNH;GPS1;RFC5;ERCC2;UVSSA;POLR2J;ATXN3;COPS6;HMGB1;POLR2I;COPS5;PCNA;ERCC6;COPS3;ERCC8;RFC4;POLD4;PRPF19;CUL4B;POLR2L;RFC3;GTF2H1;CHD1L;POLD1;ERCC5	dendritic spine organization	2	0.0214338	ARHGAP33;CUX2	cAMP binding	6	0.0266891	CNGA2;HCN4;CNGA4;POPDC2;PDE2A;HCN1	nucleoside monophosphate biosynthetic process	42	3.84657e-05	ADK;ATIC;ALDOA;UCKL1;HDDC2;CDADC1;APRT;DCTD;P2RX7;ENO3;PGK1;PPARA;UCK1;ENO2;TK2;GAPDH;PRPS1;ZBTB20;SLC25A12;EIF6;LDHC;ENO4;GALK1;PRKAG2;AK4;AK3;SLC25A13;PGAM1;TK1;CYC1;UPP1;ADPGK;HDAC4;PFKFB1;SHMT1;FBP1;PID1;ENO1;ADSS;DNAJC30;INSR;ECD	Binimetinib	2	0.0468938	UGT1A1;CYP2C19
haptoglobin-hemoglobin complex	1	0.0233901	HBZ	ficolin-1-rich granule lumen	27	0.000126243	SRP14;KRT1;MAPK1;KPNB1;ACTR1B;PSMD6;IDH1;EEF2;COMMD3;APAF1;PSMB1;PNP;HMGB1;GYG1;HSPA8;IMPDH2;MAPK14;FTH1;DBNL;PRG2;SERPINA1;PSMD7;PGAM1;CAB39;JUP;GUSB;COMMD9	coenzyme metabolic process	4	0.0217454	NUDT7;ACOT2;NAPRT;FBP1	synaptic vesicle cycle	29	0.0269468	CHRNB2;WNT7A;BSN;GRIK5;SCRIB;HTR2A;PRKCB;MAGI2;SYT11;AP3D1;CHRNA4;DGKI;SLC17A6;SYT8;FGF14;GRIPAP1;GSK3B;CNR1;SNAP25;SYT5;BRSK1;STXBP1;SYT17;TOR1A;WNT3A;SNAP23;CADPS;SLC18A2;CALM1	regulation of catabolic process	161	3.93602e-05	BBS7;RNF217;TIRAP;RNF139;TBC1D25;ALKBH5;EIF4G3;SOX9;TRIM8;HNRNPA0;ANGEL2;IGF2BP2;MEX3D;CHEK2;PAFAH1B2;N4BP1;FMR1;TNRC6A;MFN2;PRKD1;P2RX7;HSP90AA1;DDRGK1;ITCH;ATP6V1B2;ULK2;EGLN1;PTTG1IP;STYX;AURKA;PHF23;EXOSC6;NEDD4;EPHA4;HNRNPD;SH3D19;CASP3;PPARA;NUP214;AMER1;APC2;NNT;GBA;CHFR;SORL1;CIRBP;PNPLA2;KEAP1;CDK5R1;THRA;EXOC1;UBE2K;TRIM21;APAF1;MDM2;ITPR1;FBXL5;EXOC7;GAPDH;YWHAZ;LEPR;BNIP3L;GSK3B;CARHS…	positive regulation of synaptic transmission, glutamatergic	4	0.0481886	TNR;CACNG2;CACNG3;NPS
vinculin binding	1	0.0233901	ACTN1	catalytic activity, acting on DNA	36	0.000134094	MUTYH;PGBD5;POLE4;MCM6;DICER1;GEN1;ERCC2;APTX;TOP2A;RPS3;TDP1;POLG2;APEX1;CHRAC1;POLI;DHX30;MEIOB;PTGES3;GINS2;APLF;PCNA;ERCC6;TOP1MT;ALKBH2;DDX11;ERCC8;EME2;RAD51C;RAD54L;POLD4;DCLRE1A;RTEL1;HMGA2;CHD1L;POLD1;ERCC5	sulfur compound metabolic process	4	0.0217454	NUDT7;ACOT2;FMOD;GSTM5	response to cGMP	3	0.0284209	REN;HCN4;PDE2A	GDP-mannose metabolic process	6	4.05092e-05	TSTA3;PMM1;MPI;GMDS;PMM2;GUK1	nervous system process	134	0	OR2AE1;CSMD1;TLR2;LOXHD1;AIPL1;GABRE;RP1L1;GRIN2B;PIEZO2;MYO3A;OR7A10;LHCGR;OR5D18;GRIN2A;TNR;RP1;OR10AG1;OR10AD1;OR8I2;SLC26A5;KCNA1;ADCY8;ASIC2;GRM6;SERPINB6;SCN4A;WNT7A;OR3A3;OR5M8;NTRK3;OR7D4;DCANP1;OTOS;OR10G8;NPAS4;SFRP5;RGR;OR7C2;TIFAB;OPRM1;OR10P1;OR7A17;DRAM2;OR3A2;LRAT;GRM5;OR6T1;OR1A1;GTF2A1L;CNGA2;OR8H1;GABRB1;OR1M1;CST2;CRYGC;OR5D16;OR5AS1;DRD5;OR7G1;OR8K1;OR5W2;OR1B1;OR4D5;OR6B2;CAC…
BH domain binding	1	0.0233901	BAK1	iron-sulfur cluster binding	17	0.000134584	MUTYH;UQCRFS1;GLRX5;ERCC2;GLRX3;RPS3;NDUFV2;NDUFS7;ISCA2;DDX11;ISCA1;NDUFS8;RTEL1;NDUFV1;POLD1;CISD3;FXN	pancreas development	2	0.0225141	BAK1;SOX9	neurotransmitter receptor transport, postsynaptic endosome to lysosome	3	0.0284209	CACNG3;CACNG2;AP3D1	positive regulation of cell cycle process	61	4.34807e-05	MAP10;SOX4;CNOT10;CHEK2;PLCB1;DDRGK1;NUDT16;POC1A;AURKA;MEPCE;CNOT6;PHIP;GTSE1;KIF20B;PPP2R5B;CDK5R1;EPGN;MDM2;XRCC3;DMRT1;CEP295;NPM2;DDX3X;GEN1;ANAPC4;ATRX;PKD2;PRKCE;BAX;SVIL;FGF8;EREG;LRP5;CDKN1A;SIN3A;ECT2;HNRNPU;MDM4;PKP4;NIPBL;RAD21;EDN1;PIDD1;TGFA;BRD4;PRKACA;INSM1;CASP2;E2F8;UBE2C;DYRK3;FGFR1;CCNE1;BTC;PCNA;CENPJ;INSR;CDK2;CENPV;ANAPC5;TP53	transmembrane signaling receptor activity	122	0	OR2AE1;KIR3DL1;SORCS1;PROKR2;GPR26;GPR32;GABRE;GRIN2B;OR7A10;LHCGR;OR5D18;GRIN2A;OR10AG1;ADCYAP1R1;MRGPRX3;OR10AD1;OR8I2;MRGPRX1;KLRB1;CLEC1A;GRM6;GRIK3;OR3A3;OR5M8;NTRK3;OR7D4;ROBO2;TAAR8;OR10G8;HTR5A;RGR;HPGD;OR7C2;OPRM1;OR10P1;CXCR6;GPR50;OR7A17;OR3A2;GRM5;OR6T1;OR1A1;NPBWR2;LILRA1;CLEC4M;OR8H1;GABRB1;OR1M1;OR5D16;OR5AS1;DRD5;HTR1E;OR7G1;OR8K1;CMKLR1;OR5W2;OR1B1;OR4D5;OR6B2;GPRC5D;HRH4;GLRA1;O…
store-operated calcium channel activity	1	0.0233901	TRPC5	metal cluster binding	17	0.000134584	MUTYH;UQCRFS1;GLRX5;ERCC2;GLRX3;RPS3;NDUFV2;NDUFS7;ISCA2;DDX11;ISCA1;NDUFS8;RTEL1;NDUFV1;POLD1;CISD3;FXN	central nervous system neuron development	2	0.0230626	BTG2;ARX	intracellular cGMP-activated cation channel activity	3	0.0284209	CNGA2;CNGA4;CNGB3	transcription coactivator activity	69	4.5423e-05	MED31;JADE1;SMARCD2;TAF6L;SOX4;MAGED1;UBE2L3;BCL9;CBFB;ARID1A;NCOA6;CCAR1;DR1;GMEB1;TAF10;THRB;PPARA;RBM14-RBM4;MMS19;THRA;RNF4;SMARCD1;PPARG;KLF7;GMEB2;PHF2;NR1I2;NCOA2;ATXN7L3;JUN;PRPF6;NFE2L3;TCF20;SUB1;IL31RA;JMY;JUND;MEF2A;ESR2;TAF4;SP4;ANKRD1;RFXAP;MYOCD;ABT1;MED13;DHX9;PER2;SMARCA2;TRIP4;MNT;TFAP2A;YY1;ARID5B;SS18;BIRC2;MAML1;ASXL1;MED17;MED12L;DDX17;KAT6A;RERE;CCNE1;PSMD9;ECD;MED27;NR1H3;…	sensory perception	101	0	OR2AE1;LOXHD1;AIPL1;RP1L1;PIEZO2;MYO3A;OR7A10;OR5D18;GRIN2A;RP1;OR10AG1;OR10AD1;OR8I2;SLC26A5;KCNA1;ASIC2;GRM6;SERPINB6;OR3A3;OR5M8;OR7D4;OTOS;OR10G8;SFRP5;RGR;OR7C2;OPRM1;OR10P1;OR7A17;DRAM2;OR3A2;LRAT;OR6T1;OR1A1;CNGA2;OR8H1;OR1M1;CST2;CRYGC;OR5D16;OR5AS1;OR7G1;OR8K1;OR5W2;OR1B1;OR4D5;OR6B2;PDE6B;POU6F2;GLRA1;OR1L3;LPO;OR7A5;P2RX3;OR5I1;OR1L6;CNGB3;GPR179;OR2Y1;OR10K1;OR2Z1;MYO3B;ATP2B2;OR5P2;O…
cellular detoxification	2	0.023778	GSTA1;HBZ	cellular response to topologically incorrect protein	31	0.000136354	HSPA9;EIF2AK2;SYVN1;TMEM33;DNAJB9;SRPRB;DNAJB11;HSP90B1;ATXN3;KLHDC3;GOSR2;YIF1A;COPS5;HSPA8;RNF126;BAG6;DDIT3;ANKZF1;ATF3;VAPB;CCND1;SDF2L1;DDX11;CDK5RAP3;PTPN1;ARFGAP1;TMBIM6;ASNA1;ATF6B;CREB3L4;DERL1	cell-substrate adherens junction assembly	2	0.0236166	ACTN1;ITGA2	ERK1 and ERK2 cascade	45	0.029294	FGF2;PDGFD;CCL4L1;MARCO;HTR2A;CCL3;ADIPOQ;FGA;SLAMF1;CCL18;FGF23;PHB;HMGB1;EPHB1;TIAM1;BMP2;OPRM1;CCL7;FGG;PDGFC;CCL8;CCL11;CCL2;NTRK3;HRAS;FGB;BTN2A2;NPY5R;DDT;CCL1;CCL13;ALK;CCL17;RRAS;FGF10;FLCN;MAPK1;FGF4;ROS1;S100A7;ARHGAP8;PTPN1;TGFB1;C5AR1;PRMT5	macromolecule catabolic process	232	5.36014e-05	BBS7;RNF217;TIRAP;RPL13;RNF139;ATE1;RPL10;UBE2A;TOM1L1;ALKBH5;SOX9;CDC34;HNRNPA0;USP18;ANGEL2;TRIM25;FBXL4;IGF2BP2;PCYOX1;CNOT10;UPF3A;MEX3D;UBE2L3;RNF103;KCTD10;CHEK2;USP47;ERLIN2;N4BP1;USP11;RPL28;DNAJB9;FMR1;TNRC6A;DROSHA;RNASEH1;P2RX7;HSP90AA1;SQSTM1;DDRGK1;ITCH;NUDT16;DDIT3;EGLN1;PTTG1IP;STYX;AURKA;ANKZF1;HEXB;EXOSC6;DCPS;NEDD4;USP45;MAGOH;EPHA4;CNOT6;USP12;RNF187;FBXW4;HNRNPD;SH3D19;CASP3;R…	sensory perception of smell	60	2.22045e-16	OR2AE1;OR7A10;OR5D18;OR10AG1;OR10AD1;OR8I2;OR3A3;OR5M8;OR7D4;OR10G8;OR7C2;OR10P1;OR7A17;OR3A2;OR6T1;OR1A1;CNGA2;OR8H1;OR1M1;OR5D16;OR5AS1;OR7G1;OR8K1;OR5W2;OR1B1;OR4D5;OR6B2;OR1L3;OR7A5;OR5I1;OR1L6;OR2Y1;OR10K1;OR2Z1;OR5P2;OR1D2;OBP2B;OR5R1;OR8K3;OR6X1;OR4C15;OR2T11;OR10G9;OR8B8;OR56A5;OR1G1;OR1E2;OR10G4;OR2C1;OR11H6;SYT10;OR52A5;OBP2A;OR4D1;OR4C12;OR5L1;OR8U1;OR8H3;OR52E6;OR8H2
sex differentiation	3	0.024834	BAK1;HOXA10;TBX3	organic cyclic compound catabolic process	96	0.000171655	HINT1;NT5M;SLIRP;RPL21;HNRNPA0;RPL10;RPLP2;RPL37A;TIRAP;YWHAB;HNRNPU;CNOT6;RPS7;KPNB1;RPL30;RPS15A;RPS3A;MAGOH;ENTPD7;UPF2;ST20;ANGEL2;SLC6A3;DICER1;PNRC2;RPL35;RPS8;GEN1;RPL8;RPLP1;ENO3;RPS14;ZC3H14;YBX1;YWHAZ;RPL6;RPL37;HNRNPC;RPL31;ADAL;RPS11;GPX1;JMJD8;SAMD4A;APAF1;RPS3;PGK1;PNP;HMGB1;RPS15;NUDT15;HSPA8;APOBEC1;KHSRP;DDX5;APEX1;ENTPD8;MTPAP;MAPK14;RPL13;RNASET2;RPSA;TPI1;YWHAH;PDE5A;LRPPRC;SL…	focal adhesion assembly	2	0.0236166	ACTN1;ITGA2	molecular transducer activity	302	0	TRHR;ANTXR1;CHRNB2;OR3A2;OR2AG2;REG1B;MAS1;OR1N1;OR3A3;MRGPRX4;OR2B11;GRIK5;LILRA1;OR2Y1;OR52E2;PROKR2;TAS1R2;OR6F1;MRGPRX3;OR1G1;OR6A2;OR10A5;OR7A5;OR7A17;OR2G2;GRIN2B;OR10V1;ROBO2;OR11L1;REG3G;LILRA4;OR2AT4;OR10H2;MARCO;HTR2A;DMBT1;GRM6;FPR1;VN1R3;PRTG;TAAR9;HRH2;TLR2;HLA-DQA2;OR1A1;SLAMF1;OR6C6;OR7G1;OR1J2;PGLYRP3;OR7C2;CXCR1;DCC;OR10C1;PTPRO;SIGLEC8;OR7A10;SORCS1;GABRR2;TAAR6;OR7D4;OR10G4;CD3…	pyrimidine nucleotide metabolic process	21	5.73166e-05	NT5M;UCKL1;CTPS2;NME4;HDDC2;NEIL2;CDADC1;NME9;DCTD;ENTPD4;UCK1;PRPS1;NME1;CDIPT;CDS2;CMPK2;AK3;UPP1;SHMT1;DTYMK;NEIL1	detection of stimulus involved in sensory perception	65	9.99201e-16	OR2AE1;PIEZO2;OR7A10;OR5D18;OR10AG1;OR10AD1;OR8I2;KCNA1;ASIC2;GRM6;OR3A3;OR5M8;OR7D4;OR10G8;OR7C2;OR10P1;OR7A17;OR3A2;OR6T1;OR1A1;OR8H1;OR1M1;CST2;OR5D16;OR5AS1;OR7G1;OR8K1;OR5W2;OR1B1;OR4D5;OR6B2;OR1L3;LPO;OR7A5;OR5I1;OR1L6;OR2Y1;OR10K1;OR2Z1;OR5P2;OR1D2;EPHB1;OR5R1;OR8K3;OR6X1;OR4C15;OR2T11;OR10G9;OR8B8;OR56A5;OR1G1;OR1E2;OR10G4;OR2C1;OR11H6;HTR2A;OR52A5;OR4D1;OR4C12;AZGP1;OR5L1;OR8U1;OR8H3;OR5…
cerebral cortex GABAergic interneuron differentiation	1	0.0256995	ARX	5-n-undecyl-6-hydroxy-4,7-dioxobenzothiazole	6	0.000179334	UQCRFS1;CYC1;UQCR11;UQCRH;UQCRC2;UQCRC1	negative regulation of phospholipase activity	1	0.0238166	ANXA8L1	signaling receptor activity	298	0	TRHR;ANTXR1;CHRNB2;OR3A2;OR2AG2;REG1B;MAS1;OR1N1;OR3A3;MRGPRX4;OR2B11;GRIK5;LILRA1;OR2Y1;OR52E2;PROKR2;TAS1R2;OR6F1;MRGPRX3;OR1G1;OR6A2;OR10A5;OR7A5;OR7A17;OR2G2;GRIN2B;OR10V1;ROBO2;OR11L1;REG3G;LILRA4;OR2AT4;OR10H2;MARCO;HTR2A;DMBT1;GRM6;FPR1;VN1R3;PRTG;TAAR9;HRH2;TLR2;HLA-DQA2;OR1A1;SLAMF1;OR6C6;OR7G1;OR1J2;PGLYRP3;OR7C2;CXCR1;DCC;OR10C1;PTPRO;SIGLEC8;OR7A10;SORCS1;GABRR2;TAAR6;OR7D4;OR10G4;CD3…	positive regulation of biosynthetic process	324	5.75011e-05	MED31;SMYD3;JADE1;MIF4GD;SERTAD3;ACTR3;ERCC2;UBTF;LRP5L;SIX4;TIRAP;AGT;FZD8;PWP1;PHF10;SMARCD2;ICE2;POT1;SOX9;PATZ1;DDAH1;TAF6L;PF4;RLF;HIVEP3;ZNF345;ASF1A;HOXC10;SOX4;UPF3A;NFYB;MAGED1;FOXO3;STK16;UBE2L3;BCL9;CHEK2;HMGN1;RFC3;CBFB;ERLIN2;ARID1A;ZNF496;KLF13;PLCB1;FMR1;ETV6;NCL;PRKD1;P2RX7;HSP90AA1;SQSTM1;DDRGK1;NCOA6;DDIT3;GAL;MLLT3;EGLN1;E2F3;IMPACT;CCAR1;PKNOX1;DR1;HEXB;ZNF639;GMEB1;TAF10;ACVR…	olfactory receptor activity	56	2.22045e-15	OR2AE1;OR7A10;OR5D18;OR10AG1;OR10AD1;OR8I2;OR3A3;OR5M8;OR7D4;OR10G8;OR7C2;OR10P1;OR7A17;OR3A2;OR6T1;OR1A1;OR8H1;OR1M1;OR5D16;OR5AS1;OR7G1;OR8K1;OR5W2;OR1B1;OR4D5;OR6B2;OR1L3;OR7A5;OR5I1;OR1L6;OR2Y1;OR10K1;OR2Z1;OR5P2;OR1D2;OR5R1;OR8K3;OR6X1;OR4C15;OR2T11;OR10G9;OR8B8;OR56A5;OR1G1;OR1E2;OR10G4;OR2C1;OR11H6;OR52A5;OR4D1;OR4C12;OR5L1;OR8U1;OR8H3;OR52E6;OR8H2
interleukin-27-mediated signaling pathway	1	0.0256995	JAK2	METHYL (2Z)-2-(2-{[6-(2-CYANOPHENOXY)PYRIMIDIN-4-YL]OXY}PHENYL)-3-METHOXYACRYLATE	6	0.000179334	UQCRFS1;CYC1;UQCR11;UQCRH;UQCRC2;UQCRC1	response to anticoagulant	1	0.0238166	SOX9	nervous system process	285	0	KCNE1;GJA10;CHRNB2;NDN;MYH14;OR3A2;OR2AG2;WNT7A;OR1N1;OR3A3;OR2B11;SCN8A;GRIK5;OR2Y1;OR52E2;OBP2A;TAS1R2;OR6F1;OR1G1;NAV2;OR6A2;OR10A5;CTNNA2;OR7A5;OR7A17;OR2G2;GRIN2B;DRAM2;OR10V1;OR11L1;USH2A;NTF3;OTOS;OBP2B;KCNA1;OR2AT4;OR10H2;MGAT3;HTR2A;GRM6;CCL3;SCN11A;HRH2;SLC8A3;TLR2;OR1A1;OR6C6;OR7G1;OR1J2;OR7C2;RCVRN;OR10C1;CACNG3;OR7A10;GABRR2;OR7D4;BEST2;OR10G4;OR10AD1;OR14A16;GRIN2A;KCNH1;SCN5A;SLURP…	regulation of intracellular signal transduction	305	6.25284e-05	HINT1;EPS8;EDA;IGBP1;XIAP;FKBP1A;EIF2AK2;TLE1;MAP3K8;GDI1;TIRAP;AGT;FZD8;PWP1;VRK2;CLIC2;APIP;IL1F10;PSD4;NFKBID;SOX9;STAMBP;CDC34;TRIM8;STARD13;TRIM25;PF4;FIGNL1;AKAP5;P2RX2;RTKN2;IFNK;MAGED1;ARFGEF2;CHEK2;USP47;OTUD3;PLCB1;EPHB4;CYTH3;ARHGDIB;NONO;PDCD6;FAM13A;ARHGAP18;MFN2;PRKD1;P2RX7;HSP90AA1;SQSTM1;ZDHHC17;FARP1;DDRGK1;ARHGAP20;LPAR6;OCRL;ITCH;DDR2;DDIT3;SEH1L;PTTG1IP;STYX;ARHGAP21;AURKA;F3;…	detection of stimulus	76	3.10862e-15	OR2AE1;TLR2;AIPL1;PIEZO2;OTOP1;OR7A10;OR5D18;RP1;OR10AG1;OR10AD1;OR8I2;KCNA1;ASIC2;GRM6;OR3A3;OR5M8;OR7D4;OR10G8;RGR;OR7C2;OR10P1;OR7A17;OR3A2;OR6T1;OR1A1;OR8H1;OR1M1;CST2;OR5D16;OR5AS1;OR7G1;OR8K1;OR5W2;OR1B1;OR4D5;OR6B2;PDE6B;OR1L3;LPO;OR7A5;OR5I1;OR1L6;OR2Y1;OR10K1;OR2Z1;OR5P2;OR1D2;EPHB1;OR5R1;OR8K3;OR6X1;OR4C15;GRK1;OR2T11;OR10G9;OR8B8;TREM2;CRTAM;OR56A5;OR1G1;OR1E2;PGLYRP3;OR10G4;OR2C1;RCVR…
interleukin-35-mediated signaling pathway	1	0.0256995	JAK2	(5S)-3-ANILINO-5-(2,4-DIFLUOROPHENYL)-5-METHYL-1,3-OXAZOLIDINE-2,4-DIONE	6	0.000179334	UQCRFS1;CYC1;UQCR11;UQCRH;UQCRC2;UQCRC1	actin filament network formation	1	0.0238166	ACTN1	transmembrane signaling receptor activity	269	0	TRHR;ANTXR1;CHRNB2;OR3A2;OR2AG2;REG1B;MAS1;OR1N1;OR3A3;MRGPRX4;OR2B11;GRIK5;LILRA1;OR2Y1;OR52E2;PROKR2;TAS1R2;OR6F1;MRGPRX3;OR1G1;OR6A2;OR10A5;OR7A5;OR7A17;OR2G2;GRIN2B;OR10V1;ROBO2;OR11L1;REG3G;OR2AT4;OR10H2;MARCO;HTR2A;GRM6;FPR1;VN1R3;TAAR9;HRH2;HLA-DQA2;OR1A1;SLAMF1;OR6C6;OR7G1;OR1J2;OR7C2;CXCR1;DCC;OR10C1;PTPRO;SIGLEC8;OR7A10;SORCS1;GABRR2;TAAR6;OR7D4;OR10G4;OR10AD1;OR14A16;GRIN2A;MRGPRX1;OR1…	mitotic cell cycle phase transition	97	7.42734e-05	EPS8;JADE1;ERCC2;SDCCAG8;BUB1;CDC34;TUBB;TTK;SPDYA;SOX4;CNOT10;ZNF207;WEE1;CHEK2;USP47;PLCB1;CHMP7;HSP90AA1;AURKA;MEPCE;TAF10;ACVR1;CNOT6;NDE1;ERCC3;DYNLL1;NAE1;RPS27L;GTSE1;CLSPN;FBXL12;YWHAG;MDM2;XRCC3;CCNY;IK;CDKN2C;NPM2;DDX3X;GEN1;ANAPC4;ORC5;PAFAH1B1;PKD2;POLE2;DHFR;PPM1D;FBXW11;SIRT7;PPP2R1A;BAX;UBE2E1;CDKN1A;SIN3A;CEP152;DBF4;MSH6;CDKN1C;MDM4;RINT1;RAD21;FGFR1OP;PIDD1;POLA2;CHMP4B;PKMYT1;T…	molecular transducer activity	133	5.32907e-15	OR2AE1;KIR3DL1;TLR2;SORCS1;ANPEP;PROKR2;GPR26;GPR32;GABRE;GRIN2B;OR7A10;LHCGR;KLRG1;OR5D18;GRIN2A;OR10AG1;ADCYAP1R1;MRGPRX3;OR10AD1;OR8I2;LILRA4;MRGPRX1;KLRB1;CLEC1A;GRM6;GRIK3;OR3A3;OR5M8;NTRK3;OR7D4;ROBO2;TAAR8;OR10G8;DMBT1;HTR5A;RGR;HPGD;OR7C2;OPRM1;OR10P1;CXCR6;GPR50;OR7A17;MED1;OR3A2;GRM5;OR6T1;OR1A1;NPBWR2;LILRA1;CLEC4M;OR8H1;GABRB1;OR1M1;OR5D16;OR5AS1;DRD5;HTR1E;OR7G1;OR8K1;CMKLR1;SIGLEC7;…
heterochromatin assembly	1	0.0256995	SMCHD1	FAMOXADONE	6	0.000179334	UQCRFS1;CYC1;UQCR11;UQCRH;UQCRC2;UQCRC1	diet induced thermogenesis	1	0.0238166	UCP1	sensory perception	215	0	KCNE1;GJA10;CHRNB2;NDN;MYH14;OR3A2;OR2AG2;OR1N1;OR3A3;OR2B11;OR2Y1;OR52E2;OBP2A;TAS1R2;OR6F1;OR1G1;NAV2;OR6A2;OR10A5;OR7A5;OR7A17;OR2G2;DRAM2;OR10V1;OR11L1;USH2A;OTOS;OBP2B;KCNA1;OR2AT4;OR10H2;HTR2A;GRM6;CCL3;SCN11A;OR1A1;OR6C6;OR7G1;OR1J2;OR7C2;RCVRN;OR10C1;OR7A10;GABRR2;OR7D4;BEST2;OR10G4;OR10AD1;OR14A16;GRIN2A;OR1B1;OR6T1;OR10H5;OR2Z1;ATP2B2;LRAT;OR2G3;OR56A5;OR2V2;GLRA1;LPO;LCN1;VIP;OR10P1;TA…	GTPase activator activity	61	7.62067e-05	GDI1;TBC1D25;TBC1D22B;RGS1;STARD13;TBC1D10B;ACAP2;PLCB1;ARHGDIB;FAM13A;ARHGAP18;ARHGAP20;OCRL;ARHGAP21;BNIP2;ARHGAP33;SRGAP2;ARFGAP2;RAPGEF2;TBC1D19;ELMOD1;ARHGAP12;ARHGAP1;RABGAP1L;TBC1D4;AGFG1;RANBP1;ARHGAP4;ARFGAP3;SIPA1L1;JUN;TBC1D15;ARAP3;DEPDC5;ARHGAP26;ARHGAP11B;ARHGEF6;IQGAP1;ARHGAP10;ARHGAP29;GNB5;TRIP10;ECT2;TBC1D1;RGS5;RANBP2;SMAP1;SYDE1;SRGAP1;ARHGAP44;TBC1D9B;ASAP3;DOCK1;CDC42EP2;MYO…	Olfactory transduction	58	3.12417e-13	OR2AE1;OR7A10;OR5D18;OR10AG1;OR10AD1;OR8I2;PDE1C;OR3A3;OR5M8;OR7D4;OR10G8;OR7C2;OR10P1;OR7A17;OR3A2;OR6T1;OR1A1;CNGA2;OR8H1;OR1M1;OR5D16;OR5AS1;OR7G1;OR8K1;OR5W2;OR1B1;OR4D5;OR6B2;OR1L3;OR7A5;OR5I1;OR1L6;OR2Y1;OR10K1;OR2Z1;OR5P2;OR1D2;OR5R1;OR8K3;OR6X1;OR4C15;OR2T11;OR10G9;OR8B8;OR56A5;OR1G1;OR1E2;OR10G4;OR2C1;OR11H6;OR52A5;OR4D1;OR4C12;OR5L1;OR8U1;OR8H3;OR52E6;OR8H2
transforming growth factor beta1 production	1	0.0256995	SERPINB7	METHYL (2Z)-3-METHOXY-2-{2-[(E)-2-PHENYLVINYL]PHENYL}ACRYLATE	6	0.000179334	UQCRFS1;CYC1;UQCR11;UQCRH;UQCRC2;UQCRC1	post-embryonic animal organ morphogenesis	1	0.0238166	BAK1	detection of stimulus	173	0	GJA10;OR3A2;OR2AG2;OR1N1;OR3A3;OR2B11;OR2Y1;OR52E2;TAS1R2;OR6F1;OR1G1;OR6A2;OR10A5;OR7A5;OR7A17;NLRC4;OR2G2;OR10V1;OR11L1;KCNA1;OR2AT4;OR10H2;HTR2A;GRM6;TLR2;OR1A1;OR6C6;OR7G1;OR1J2;PGLYRP3;OR7C2;RCVRN;OR10C1;OR7A10;OR7D4;OR10G4;OR10AD1;OR14A16;OR1B1;OR6T1;OR10H5;OR2Z1;NOX3;OR2G3;NPFFR2;CUL4B;OR56A5;OR2V2;LPO;CSRP3;OR10P1;PDE6B;OR4C13;OR10A6;OR1L3;EPHB1;OR1K1;OR5AU1;POLD4;OR6C74;OR2AG1;OR10A2;OR2…	deoxyribonucleotide biosynthetic process	9	7.66639e-05	ADK;HDDC2;CDADC1;DCTD;RRM1;CMPK2;GUK1;SHMT1;DTYMK	odorant binding	21	1.0617e-10	OR5D18;OR8I2;OR5M8;OR8H1;OR5D16;OR5AS1;OR8K1;OR5W2;OR6B2;OR5I1;OR5P2;OBP2B;OR5R1;OR8K3;OR8B8;OR2C1;OBP2A;OR5L1;OR8U1;OR8H3;OR8H2
hemoglobin complex	1	0.0256995	HBZ	2-NONYL-4-HYDROXYQUINOLINE N-OXIDE	6	0.000179334	UQCRFS1;CYC1;UQCR11;UQCRH;UQCRC2;UQCRC1	negative regulation of photoreceptor cell differentiation	1	0.0238166	SOX9	detection of stimulus involved in sensory perception	144	0	GJA10;OR3A2;OR2AG2;OR1N1;OR3A3;OR2B11;OR2Y1;OR52E2;TAS1R2;OR6F1;OR1G1;OR6A2;OR10A5;OR7A5;OR7A17;OR2G2;OR10V1;OR11L1;KCNA1;OR2AT4;OR10H2;HTR2A;GRM6;OR1A1;OR6C6;OR7G1;OR1J2;OR7C2;OR10C1;OR7A10;OR7D4;OR10G4;OR10AD1;OR14A16;OR1B1;OR6T1;OR10H5;OR2Z1;OR2G3;OR56A5;OR2V2;LPO;OR10P1;OR4C13;OR10A6;OR1L3;EPHB1;OR1K1;OR5AU1;OR6C74;OR2AG1;OR10A2;OR2T11;OR5A1;OR7G2;OR12D2;OR2W5;CACNA2D4;OR6B3;OR1M1;OR4A16;OR52…	positive regulation of nucleic acid-templated transcription	268	7.76424e-05	MED31;SMYD3;JADE1;SERTAD3;ACTR3;ERCC2;UBTF;LRP5L;SIX4;AGT;FZD8;PWP1;PHF10;SMARCD2;ICE2;SOX9;PATZ1;TAF6L;PF4;RLF;HIVEP3;ZNF345;ASF1A;HOXC10;SOX4;NFYB;MAGED1;FOXO3;STK16;UBE2L3;BCL9;CHEK2;HMGN1;CBFB;ERLIN2;ARID1A;ZNF496;KLF13;PLCB1;ETV6;NCL;PRKD1;SQSTM1;DDRGK1;NCOA6;DDIT3;GAL;MLLT3;EGLN1;E2F3;CCAR1;PKNOX1;DR1;HEXB;ZNF639;GMEB1;TAF10;ACVR1;HOXC6;PAXIP1;SSBP4;CREM;SOX5;CNOT6;ZNF131;PHIP;RNF187;HNRNPD…	defense response to bacterium	34	1.90916e-09	DEFB4B;DEFB105A;DEFB104A;SPAG11B;S100A14;TLR2;IRF8;AICDA;IRGM;LCE3A;DEFB107A;SPON2;DEFA5;DMBT1;S100A9;DEFB124;FGA;CLEC4D;DEFB106A;S100A12;DEFB128;LALBA;LPO;SYK;NLRP1;MPO;DEFB123;DEFB115;FGB;PGLYRP3;DEFB116;NLRP10;CRP;LYZL2
Swr1 complex	1	0.0256995	ANP32E	UBIQUINONE-2	6	0.000179334	UQCRFS1;CYC1;UQCR11;UQCRH;UQCRC2;UQCRC1	renal vesicle formation	1	0.0238166	SOX9	sensory perception of chemical stimulus	151	0	OR3A2;OR2AG2;OR1N1;OR3A3;OR2B11;OR2Y1;OR52E2;OBP2A;TAS1R2;OR6F1;OR1G1;NAV2;OR6A2;OR10A5;OR7A5;OR7A17;OR2G2;OR10V1;OR11L1;OBP2B;OR2AT4;OR10H2;OR1A1;OR6C6;OR7G1;OR1J2;OR7C2;OR10C1;OR7A10;OR7D4;BEST2;OR10G4;OR10AD1;OR14A16;OR1B1;OR6T1;OR10H5;OR2Z1;OR2G3;OR56A5;OR2V2;LPO;LCN1;OR10P1;TAAR5;OR4C13;OR10A6;OR1L3;OR1K1;OR5AU1;OR6C74;OR2AG1;OR10A2;OR2T11;OR5A1;OR7G2;OR12D2;OR2W5;OR6B3;OR1M1;OR4A16;OR52A1;O…	nuclear chromosome	111	7.77517e-05	PHF12;BRD9;PHF10;GAR1;ETV3;SMARCD2;UBE2A;TERF2;POT1;BUB1;FIGNL1;BIRC5;TTI2;ASF1A;MPHOSPH8;THOC3;H3F3A;STAG3;ARID1A;PLCB1;ERCC5;MXD1;RBBP4;H2AFX;SATB1;AURKA;THRB;NABP1;SMAD2;SMARCD1;UBE2I;XRCC3;ACD;PURB;RAD9B;PBRM1;CHRAC1;IK;NPM2;UHRF1;JUN;BRMS1L;KAT8;SNAI2;ORC5;ATRX;TERF1;POLE2;TOP1;GATAD2A;MCMBP;TINF2;POLD2;CHAF1B;SIRT7;JUND;MEF2A;DCLRE1B;ADD3;TAF4;MBD3;SIN3A;MYOCD;SPIDR;CREB1;MSH6;HNRNPU;KLHDC3…	substrate-specific channel activity	49	2.11766e-09	CATSPER2;TRPC5;KCNK9;RYR3;GABRE;GRIN2B;PIEZO2;OTOP1;KCNB2;GRIN2A;SLC14A2;KCNA1;ASIC2;SCN4A;GRIK3;KCNT2;OPRM1;LRRC8E;TMEM38A;ASIC5;KCNK18;KCNQ3;CNGA2;GABRB1;CLCN6;CACNG2;GLRA1;KCNA4;P2RX3;KCNIP4;JPH3;KCNT1;CNGB3;KCNV1;GABRA6;CACNG3;GABRA4;CLCN7;GRIK5;NMUR2;GRIA2;GABRP;NALCN;SCN5A;TMEM63C;SCN11A;KCNQ2;CACNA1A;CATSPER1
acetylcholine receptor binding	1	0.0256995	JAK2	organonitrogen compound catabolic process	167	0.000206314	HINT1;RNF139;CDC34;NT5M;BAG5;FBXW5;SF3B3;GBA;BBS7;CTSV;PSMF1;FGF2;USP50;GSK3B;TRIM3;DCN;RPS7;VPS37A;BIRC6;SYVN1;PSMD8;PCYOX1;PSMD6;LYPLA1;RCHY1;ARIH2;ARG2;RNF4;TRIB1;JKAMP;SMPD1;HTRA2;SLC6A3;DNAJB9;BTRC;PSME2;PSMD9;UBE2E1;FBXO45;RNF144B;RBCK1;ACER1;PSMA7;ACADSB;TMEM67;FOXRED2;SHMT1;HSP90B1;ADAL;HYKK;ATXN3;GPX1;CUL2;UBA6;RNF167;ZFAND2B;RAB26;USP47;GOT1;GGA3;PRSS16;PSMB1;PNP;MAD2L1;FBXO11;NUDT15;HG…	positive regulation of male gonad development	1	0.0238166	SOX9	detection of chemical stimulus	143	0	OR3A2;OR2AG2;OR1N1;OR3A3;OR2B11;OR2Y1;OR52E2;TAS1R2;OR6F1;OR1G1;OR6A2;OR10A5;OR7A5;OR7A17;OR2G2;OR10V1;OR11L1;OR2AT4;OR10H2;TLR2;OR1A1;OR6C6;OR7G1;OR1J2;OR7C2;OR10C1;OR7A10;OR7D4;OR10G4;OR10AD1;OR14A16;OR1B1;OR6T1;OR10H5;OR2Z1;OR2G3;OR56A5;OR2V2;LPO;OR10P1;OR4C13;OR10A6;OR1L3;OR1K1;OR5AU1;OR6C74;OR2AG1;OR10A2;OR2T11;OR5A1;OR7G2;OR12D2;OR2W5;OR6B3;OR1M1;OR4A16;OR52A1;OR52N5;OR2T8;OR9A2;OR11A1;OR2D…	protein-containing complex assembly	306	7.78934e-05	DHRS4;EPS8;SMYD3;ACTR3;ERCC2;FKBP1A;UBTF;EIF2AK2;TLE1;BBS12;TIMMDC1;ALDOA;FANCA;ST13;APIP;COX11;RPL10;PFN1;SOX9;ARPC5;EIF2S3;SDHAF1;GNB1;NDUFAF1;ASF1A;KCNA2;P2RX2;ZNF207;BCL9;KCTD10;ADAR;H3F3A;DARS;USP39;PDCD6;NDUFS4;ERCC5;ARHGAP18;P2RX7;HSP90AA1;SQSTM1;AHNAK;ITGB3BP;EIF5;ATXN2L;RBBP4;H2AFX;DDIT3;TTC19;ANKRD28;KHDRBS3;MAP2;FES;IMPACT;SEC24B;DR1;CENPU;KCTD11;VDAC2;TAF10;TIGD5;PAXIP1;FMN1;BIK;CNOT6…	channel activity	50	4.91407e-09	CATSPER2;TRPC5;KCNK9;RYR3;GABRE;GRIN2B;PIEZO2;OTOP1;KCNB2;GRIN2A;SLC14A2;KCNA1;ASIC2;SCN4A;GRIK3;KCNT2;OPRM1;LRRC8E;TMEM38A;ASIC5;KCNK18;KCNQ3;CNGA2;GABRB1;CLCN6;CACNG2;GLRA1;KCNA4;P2RX3;KCNIP4;JPH3;KCNT1;CNGB3;KCNV1;GABRA6;CACNG3;GABRA4;CLCN7;GRIK5;NMUR2;GRIA2;GABRP;NALCN;SCN5A;TMEM63C;SCN11A;KCNQ2;PRF1;CACNA1A;CATSPER1
insulin receptor substrate binding	1	0.0256995	JAK2	response to topologically incorrect protein	36	0.000209331	HSPA9;EIF2AK2;SYVN1;TMEM33;F12;JKAMP;HSPD1;DNAJB9;SRPRB;DNAJB11;HSP90B1;ATXN3;KLHDC3;GOSR2;YIF1A;COPS5;HSPA8;RNF126;BAG6;MFN2;DDIT3;ANKZF1;ATF3;VAPB;CCND1;SDF2L1;UBXN4;DDX11;CDK5RAP3;PTPN1;ARFGAP1;TMBIM6;ASNA1;ATF6B;CREB3L4;DERL1	histidine catabolic process	1	0.0238166	HNMT	Olfactory transduction	143	0	OR1F12;OR3A2;OR2AG2;OR1N1;OR3A3;OR2B11;OR2Y1;OR52E2;OR4E2;OR6F1;OR1G1;OR6A2;OR10A5;OR7A5;OR7A17;OR2G2;OR10V1;OR11L1;OR2AT4;OR10H2;SLC8A3;OR1A1;OR6C6;OR7G1;OR1J2;OR7C2;OR10C1;OR7A10;OR2AJ1;OR7D4;OR10G4;OR10AD1;OR14A16;OR1B1;OR6T1;OR10H5;OR2Z1;OR2G3;OR56A5;OR2V2;OR10P1;OR4C13;OR10A6;OR1L3;ANO2;OR1K1;OR5AU1;OR6C74;OR2AG1;OR10A2;OR2T11;OR5A1;OR7G2;OR12D2;OR2W5;OR6B3;OR1M1;OR4A16;OR52A1;OR52N5;OR2T8;O…	positive regulation of cell cycle	78	7.83707e-05	DYNLT3;TTL;MAP10;SPDYA;SOX4;CNOT10;CHEK2;PLCB1;CCNYL1;DDRGK1;NUDT16;ASNS;POC1A;AURKA;MEPCE;CNOT6;PHIP;GTSE1;KIF20B;PPP2R5B;CDK5R1;LRP6;EPGN;TRIM21;MDM2;XRCC3;PTK6;DMRT1;CCNY;CEP295;NPM2;DDX3X;CCPG1;GEN1;ANAPC4;ATRX;PAFAH1B1;PKD2;C6orf89;PRKCE;FOXA1;BAX;SVIL;FGF8;EREG;LRP5;CDKN1A;SIN3A;HES1;ECT2;STAT5B;HNRNPU;MDM4;PKP4;NIPBL;RAD21;EDN1;CDK9;PIDD1;TGFA;BRD4;PRKACA;INSM1;CASP2;E2F8;UBE2C;DYRK3;PPP1R…	passive transmembrane transporter activity	50	5.28677e-09	CATSPER2;TRPC5;KCNK9;RYR3;GABRE;GRIN2B;PIEZO2;OTOP1;KCNB2;GRIN2A;SLC14A2;KCNA1;ASIC2;SCN4A;GRIK3;KCNT2;OPRM1;LRRC8E;TMEM38A;ASIC5;KCNK18;KCNQ3;CNGA2;GABRB1;CLCN6;CACNG2;GLRA1;KCNA4;P2RX3;KCNIP4;JPH3;KCNT1;CNGB3;KCNV1;GABRA6;CACNG3;GABRA4;CLCN7;GRIK5;NMUR2;GRIA2;GABRP;NALCN;SCN5A;TMEM63C;SCN11A;KCNQ2;PRF1;CACNA1A;CATSPER1
long-chain fatty acid metabolic process	2	0.0264656	ACOT2;GSTA1	ubiquitin protein ligase binding	49	0.000230055	RNF31;BAG5;HSPA9;GSK3B;CCDC50;TRIB1;NAE1;JKAMP;HSPD1;TUBB;YWHAZ;SLC25A5;ATXN3;HLTF;CUL2;HSPA8;ZNF746;USP19;UBXN1;PCBP2;ERLIN1;CHEK2;RNF8;BAG6;JUN;SUMO2;MFN2;CACYBP;UBE2L3;TPI1;MOAP1;PRKAR2A;LRPPRC;UQCRC1;SMG5;RANGAP1;SUMO1;FZD4;TMBIM6;UBE2K;GLMN;CUL4B;FZD8;ARRDC1;PRKACA;SNCAIP;PYHIN1;DERL1;ARIH1	imidazole-containing compound catabolic process	1	0.0238166	HNMT	detection of chemical stimulus involved in sensory perception	137	0	OR3A2;OR2AG2;OR1N1;OR3A3;OR2B11;OR2Y1;OR52E2;TAS1R2;OR6F1;OR1G1;OR6A2;OR10A5;OR7A5;OR7A17;OR2G2;OR10V1;OR11L1;OR2AT4;OR10H2;OR1A1;OR6C6;OR7G1;OR1J2;OR7C2;OR10C1;OR7A10;OR7D4;OR10G4;OR10AD1;OR14A16;OR1B1;OR6T1;OR10H5;OR2Z1;OR2G3;OR56A5;OR2V2;LPO;OR10P1;OR4C13;OR10A6;OR1L3;OR1K1;OR5AU1;OR6C74;OR2AG1;OR10A2;OR2T11;OR5A1;OR7G2;OR12D2;OR2W5;OR6B3;OR1M1;OR4A16;OR52A1;OR52N5;OR2T8;OR9A2;OR11A1;OR2D3;OR1…	mitochondrial part	181	8.06469e-05	NUDT13;MRPL28;COX7C;FKBP8;MRPL44;MRPL46;TIMMDC1;MTERF2;NT5M;VRK2;MRPS18A;VDAC3;COX11;MRPS10;SLC25A44;PRDX5;FAHD1;GPD2;GFM2;CHDH;NME4;ARMCX2;TXN2;SDHAF1;OXCT1;MCUR1;STARD13;MRPL17;FBXL4;NDUFAF1;IMMT;LARS2;ETNPPL;SLC25A1;FOXO3;STARD7;ARMCX6;MRPS25;CISD1;SDHC;NDUFS4;MFN2;BNIP1;BRI3BP;TMEM177;TTC19;AADAT;ANKZF1;VDAC2;BIK;EPHA4;DLAT;MFN1;SFXN4;IDH3G;TMEM14C;TMEM126A;NNT;MTHFD2L;PCCB;COQ10B;CHCHD4;PDK1…	Primidone	11	9.21486e-09	GABRE;CYP2C8;CYP2B6;GABRB1;GABRA6;GABRA4;GRIA2;GABRP;CYP2C9;UGT1A1;CYP2C19
cytokine receptor binding	3	0.0268021	JAK2;S100A14;DEFB4B	Spliceosome	28	0.000231688	DHX16;SF3B3;HNRNPU;U2AF2;SRSF3;SMNDC1;MAGOH;TXNL4A;PRPF6;SNRNP200;HNRNPC;THOC3;SNRPG;HSPA8;DDX5;SNRPB;HNRNPA3;PUF60;SNRPD3;TCERG1;SF3B1;TRA2A;PRPF3;PRPF19;ISY1;RBM25;SF3B2;SF3A2	trachea cartilage development	1	0.0238166	SOX9	sensory perception of smell	141	0	OR3A2;OR2AG2;OR1N1;OR3A3;OR2B11;OR2Y1;OR52E2;OBP2A;OR6F1;OR1G1;NAV2;OR6A2;OR10A5;OR7A5;OR7A17;OR2G2;OR10V1;OR11L1;OBP2B;OR2AT4;OR10H2;OR1A1;OR6C6;OR7G1;OR1J2;OR7C2;OR10C1;OR7A10;OR7D4;BEST2;OR10G4;OR10AD1;OR14A16;OR1B1;OR6T1;OR10H5;OR2Z1;OR2G3;OR56A5;OR2V2;OR10P1;OR4C13;OR10A6;OR1L3;OR1K1;OR5AU1;OR6C74;OR2AG1;OR10A2;OR2T11;OR5A1;OR7G2;OR12D2;OR2W5;OR6B3;OR1M1;OR4A16;OR52A1;OR52N5;OR2T8;OR9A2;OR11…	positive regulation of RNA biosynthetic process	268	8.11277e-05	MED31;SMYD3;JADE1;SERTAD3;ACTR3;ERCC2;UBTF;LRP5L;SIX4;AGT;FZD8;PWP1;PHF10;SMARCD2;ICE2;SOX9;PATZ1;TAF6L;PF4;RLF;HIVEP3;ZNF345;ASF1A;HOXC10;SOX4;NFYB;MAGED1;FOXO3;STK16;UBE2L3;BCL9;CHEK2;HMGN1;CBFB;ERLIN2;ARID1A;ZNF496;KLF13;PLCB1;ETV6;NCL;PRKD1;SQSTM1;DDRGK1;NCOA6;DDIT3;GAL;MLLT3;EGLN1;E2F3;CCAR1;PKNOX1;DR1;HEXB;ZNF639;GMEB1;TAF10;ACVR1;HOXC6;PAXIP1;SSBP4;CREM;SOX5;CNOT6;ZNF131;PHIP;RNF187;HNRNPD…	innate immune response	72	4.82885e-08	JAK2;HLA-DPB1;DEFB105A;DEFB104A;KIR3DL1;S100A14;TLR2;IFI35;IRF8;IRGM;TARM1;OTOP1;DHX58;CCL13;IFITM3;KLRG1;MUC16;LILRA4;DEFB107A;SPON2;DEFA5;A2M;DMBT1;C6;CLEC2A;NLRP9;S100A9;DEFB124;MED1;CCL2;CLEC4M;TREML4;FGA;CLEC4D;C7;DEFB106A;NCF2;CLEC12B;C1QB;CFHR5;AIM2;S100A12;DEFB128;CD300E;KIR2DL4;RFTN1;LILRB1;LY9;MUC5AC;CCL7;SYK;CD226;MUCL1;MARCO;MUC13;CCL1;ZC3HAV1;TREM2;RIOK3;CRTAM;NLRP1;DEFB123;CCL4L1;DE…
regulation of body fluid levels	4	0.0268253	JAK2;ACTN1;ANXA8;CSRP1	mitochondrion	203	0.000251487	SLC25A24;PEBP1;NT5M;BAG5;VRK2;DHFR;SLIRP;HJURP;DTYMK;DHRS4;MUTYH;UQCRFS1;HSPA9;YWHAB;MAPK1;FAHD1;RANBP2;GSK3B;MCUR1;SLC25A53;HEATR1;SDHC;HEBP2;CHCHD4;MRPS25;FKBP8;CYC1;GLRX5;ARG2;MRPL28;AURKAIP1;MTHFD2;NOL7;HTRA2;HSPD1;JTB;TTC19;UQCR11;NDUFS6;MCU;MRPL37;CHCHD5;SLC25A10;AGPAT4;MPV17L2;CD3EAP;RNF144B;ARMC10;SLC25A30;IDH1;YWHAZ;NDUFA4;SLC25A5;UQCRH;NDUFA6;ACADSB;SOD1;BAD;YWHAG;SLC25A3;IMMT;MRPL9;MMA…	metanephric nephron tubule morphogenesis	1	0.0238166	SOX9	detection of chemical stimulus involved in sensory perception of smell	131	0	OR3A2;OR2AG2;OR1N1;OR3A3;OR2B11;OR2Y1;OR52E2;OR6F1;OR1G1;OR6A2;OR10A5;OR7A5;OR7A17;OR2G2;OR10V1;OR11L1;OR2AT4;OR10H2;OR1A1;OR6C6;OR7G1;OR1J2;OR7C2;OR10C1;OR7A10;OR7D4;OR10G4;OR10AD1;OR14A16;OR1B1;OR6T1;OR10H5;OR2Z1;OR2G3;OR56A5;OR2V2;OR10P1;OR4C13;OR10A6;OR1L3;OR1K1;OR5AU1;OR6C74;OR2AG1;OR10A2;OR2T11;OR5A1;OR7G2;OR12D2;OR2W5;OR6B3;OR1M1;OR4A16;OR52A1;OR52N5;OR2T8;OR9A2;OR11A1;OR2D3;OR14J1;OR1D2;O…	2'-deoxyribonucleotide biosynthetic process	8	8.26391e-05	ADK;HDDC2;CDADC1;DCTD;CMPK2;GUK1;SHMT1;DTYMK	Amitriptyline	13	1.19877e-07	SLC6A2;CYP2C8;KCNA1;CYP2B6;OPRM1;KCNQ3;HRH4;CYP2C9;KCNQ2;UGT1A1;CYP2C19;HTR2A;HRH2
regulation of proteolysis	5	0.02712	JAK2;BAK1;SERPINB7;SERPINB3;ANXA8	spliceosomal complex	34	0.000260698	IK;DHX16;SF3B3;HNRNPU;U2AF2;RBM5;SMNDC1;MAGOH;HNRNPF;TXNL4A;RBM3;SF1;PRPF6;SNRNP200;YBX1;HNRNPC;SNRPG;PNN;PRPF4B;HSPA8;DDX5;BUD13;SNRPB;HNRNPA3;RBM28;LUC7L;SNRPD3;SF3B1;PRPF3;SREK1;PRPF19;RBM41;SF3B2;SF3A2	mesenchymal stem cell differentiation	1	0.0238166	SOX9	olfactory receptor activity	131	0	OR3A2;OR2AG2;OR1N1;OR3A3;OR2B11;OR2Y1;OR52E2;OR6F1;OR1G1;OR6A2;OR10A5;OR7A5;OR7A17;OR2G2;OR10V1;OR11L1;OR2AT4;OR10H2;OR1A1;OR6C6;OR7G1;OR1J2;OR7C2;OR10C1;OR7A10;OR7D4;OR10G4;OR10AD1;OR14A16;OR1B1;OR6T1;OR10H5;OR2Z1;OR2G3;OR56A5;OR2V2;OR10P1;OR4C13;OR10A6;OR1L3;OR1K1;OR5AU1;OR6C74;OR2AG1;OR10A2;OR2T11;OR5A1;OR7G2;OR12D2;OR2W5;OR6B3;OR1M1;OR4A16;OR52A1;OR52N5;OR2T8;OR9A2;OR11A1;OR2D3;OR14J1;OR1D2;O…	deoxyribose phosphate biosynthetic process	8	8.26391e-05	ADK;HDDC2;CDADC1;DCTD;CMPK2;GUK1;SHMT1;DTYMK	defense response	111	1.5277e-07	DEFB4B;JAK2;HLA-DPB1;DEFB105A;SCGB1A1;CMA1;HPR;DEFB104A;SPAG11B;KIR3DL1;FANCD2;S100A14;TLR2;IFI35;IRF8;AICDA;GPR32;IRGM;TARM1;OTOP1;DHX58;CCL13;IFITM3;KLRG1;MUC16;LILRA4;MRGPRX1;ADCY8;CLEC1A;LCE3A;CST3;DEFB107A;SPON2;DEFA5;A2M;DMBT1;C6;CLEC2A;NLRP9;S100A9;OPRM1;PRKCQ;DEFB124;CXCR6;NLRP4;MED1;CCL2;LILRA1;CLEC4M;TREML4;FGA;CLEC4D;C7;DEFB106A;NCF2;CLEC12B;C1QB;CMKLR1;CFHR5;AIM2;S100A12;DEFB128;HRH4;…
cardiac cell fate commitment	1	0.0280036	TBX3	cytosolic small ribosomal subunit	13	0.000284418	RPS7;RPS15A;RPS3A;RPS8;RPS14;RPS11;RPS3;RPS15;RPSA;EIF2A;RPS2;RPS12;RPS16	tangential migration from the subventricular zone to the olfactory bulb	1	0.0238166	ARX	channel activity	98	1.53477e-12	KCNE1;GJA10;CHRNB2;SCN8A;GRIK5;GRIN2B;KCNQ2;KCNA1;KCNQ3;SCN11A;ANO5;CACNG3;GABRR2;BEST2;KCNB2;GRIN2A;KCNH1;SCN5A;KCNK18;TRPC4;GLRA1;CACNG2;GABRB1;KCNT1;SCN10A;FAM155A;NALCN;GABRE;ANO2;OPRM1;KCNK9;SLC24A1;RYR1;NMUR2;OTOP1;GABRB3;GABRP;CACNA2D4;TMEM63C;GLRA3;KCNT2;CHRNA4;TRPC7;GRID1;TRPC3;SLC24A5;KCNG2;GJA8;CACNA1A;KCNN1;CNGA2;PKD2L1;RYR3;TRPM2;LRRC18;GRIK3;GABRQ;GRIN3B;MIP;KCNE2;HCN4;KCNK2;TRPC6;G…	nucleobase-containing compound catabolic process	107	8.72403e-05	HINT1;ADAL;TIRAP;RPL13;ALDOA;NT5M;RPL10;ALKBH5;HNRNPA0;ANGEL2;NEIL2;CDADC1;IGF2BP2;CNOT10;UPF3A;MEX3D;RPL28;FMR1;TNRC6A;DROSHA;RNASEH1;P2RX7;NUDT16;EXOSC6;DCPS;MAGOH;CNOT6;ENO3;HNRNPD;ENTPD4;CASP3;NUDT11;RPLP0;RNASET2;PGK1;PPARA;NUP214;PNP;NT5C1B-RDH14;CIRBP;ENO2;APAF1;RPL8;GAPDH;YWHAZ;CARHSP1;DIS3L;XPO1;ZC3H14;ZBTB20;RNPS1;PDE8B;SLC25A12;DNASE1L2;GEN1;AXIN2;KHSRP;RPS7;EIF6;SMG9;RNH1;ENTPD7;ACAT1…	Olanzapine	14	1.89755e-07	GABRE;HTR5A;GABRB1;DRD5;HTR1E;HRH4;GABRA6;GABRA4;GABRP;CYP2C9;UGT1A1;CYP2C19;HTR2A;HRH2
regulation of phospholipase A2 activity	1	0.0280036	ANXA8	Artenimol	20	0.000295951	SRP14;RPL10;SF1;RPL35;RPS8;TUBB;P4HB;PFN1;PGK1;DPYSL2;HSPA8;KHSRP;DDX5;TPI1;CLIC1;PGAM1;NPM1;RPL4;ENO1;SFPQ	fibrinogen complex	1	0.0238166	FGL1	passive transmembrane transporter activity	98	1.75948e-12	KCNE1;GJA10;CHRNB2;SCN8A;GRIK5;GRIN2B;KCNQ2;KCNA1;KCNQ3;SCN11A;ANO5;CACNG3;GABRR2;BEST2;KCNB2;GRIN2A;KCNH1;SCN5A;KCNK18;TRPC4;GLRA1;CACNG2;GABRB1;KCNT1;SCN10A;FAM155A;NALCN;GABRE;ANO2;OPRM1;KCNK9;SLC24A1;RYR1;NMUR2;OTOP1;GABRB3;GABRP;CACNA2D4;TMEM63C;GLRA3;KCNT2;CHRNA4;TRPC7;GRID1;TRPC3;SLC24A5;KCNG2;GJA8;CACNA1A;KCNN1;CNGA2;PKD2L1;RYR3;TRPM2;LRRC18;GRIK3;GABRQ;GRIN3B;MIP;KCNE2;HCN4;KCNK2;TRPC6;G…	GTPase regulator activity	66	8.73616e-05	GDI1;RALGDS;TBC1D25;TBC1D22B;RGS1;STARD13;TBC1D10B;ACAP2;PLCB1;ARHGDIB;FAM13A;ARHGAP18;ARHGAP20;OCRL;ARHGAP21;BNIP2;ARHGAP33;SRGAP2;ARFGAP2;RAPGEF2;TBC1D19;ELMOD1;ARHGAP12;ARHGAP1;RABGAP1L;TBC1D4;AGFG1;RANBP1;ARHGAP4;ARFGAP3;RUNDC3A;SIPA1L1;JUN;TBC1D15;ARAP3;DEPDC5;ARHGAP26;ARHGAP11B;ARHGEF6;IQGAP1;ARHGAP10;ARHGAP29;GNB5;WAS;CDC42SE1;TRIP10;ECT2;RTKN;TBC1D1;RGS5;RANBP2;SMAP1;SYDE1;SRGAP1;ARHGAP44…	neurotransmitter receptor activity	20	2.03212e-07	GABRE;GRIN2B;GRIN2A;GRIK3;HTR5A;OPRM1;GRM5;OR6T1;GABRB1;DRD5;HTR1E;HRH4;GLRA1;GABRA6;GABRA4;GRIK5;GRIA2;OR56A5;HTR2A;HRH2
membrane hyperpolarization	1	0.0280036	TRPC5	mitochondrial inner membrane	71	0.0002992	SLC25A24;UQCRFS1;MCUR1;SLC25A53;SDHC;MRPS25;CYC1;MRPL28;AURKAIP1;HSPD1;TTC19;UQCR11;NDUFS6;MCU;MRPL37;SLC25A10;MPV17L2;SLC25A30;NDUFA4;SLC25A5;UQCRH;NDUFA6;SLC25A3;IMMT;MRPL9;MRPL51;SLC25A44;MTG1;SLC25A43;NDUFAF4;RPS3;MRPL24;GOT2;MICU3;SLC25A14;MRPL1;DUSP18;GHITM;NDUFV2;NDUFB9;TIMM10B;COX15;MRPL38;BCS1L;UQCRC2;MRPS26;NDUFS7;PMPCA;SLC25A36;MRPS21;SLC25A22;SFXN4;UQCRC1;COX8C;MRPS10;MTG2;NDUFS8;TMEM…	galactosidase activity	1	0.0238166	GLB1L	substrate-specific channel activity	93	4.53171e-12	KCNE1;CHRNB2;SCN8A;GRIK5;GRIN2B;KCNQ2;KCNA1;KCNQ3;SCN11A;ANO5;CACNG3;GABRR2;BEST2;KCNB2;GRIN2A;KCNH1;SCN5A;KCNK18;TRPC4;GLRA1;CACNG2;GABRB1;KCNT1;SCN10A;FAM155A;NALCN;GABRE;ANO2;OPRM1;KCNK9;SLC24A1;RYR1;NMUR2;OTOP1;GABRB3;GABRP;CACNA2D4;TMEM63C;GLRA3;KCNT2;CHRNA4;TRPC7;GRID1;TRPC3;SLC24A5;KCNG2;CACNA1A;KCNN1;CNGA2;PKD2L1;RYR3;TRPM2;LRRC18;GRIK3;GABRQ;GRIN3B;MIP;KCNE2;HCN4;KCNK2;TRPC6;GABRA3;CCT8L…	cell cycle phase transition	103	9.04529e-05	EPS8;JADE1;ERCC2;SDCCAG8;BUB1;CDC34;TUBB;TTK;SPDYA;SOX4;CNOT10;ZNF207;WEE1;UBE2L3;CHEK2;USP47;PLCB1;CHMP7;HSP90AA1;DDRGK1;AURKA;MEPCE;TAF10;ACVR1;PAXIP1;CNOT6;NDE1;ERCC3;DYNLL1;NAE1;RPS27L;GTSE1;CLSPN;FBXL12;YWHAG;MDM2;XRCC3;CCNY;IK;CDKN2C;NPM2;DDX3X;GEN1;ANAPC4;ORC5;PAFAH1B1;PKD2;POLE2;DHFR;PPM1D;FBXW11;SIRT7;PPP2R1A;BAX;UBE2E1;CDKN1A;SIN3A;CEP152;DBF4;MSH6;CDKN1C;MDM4;RINT1;RAD21;FGFR1OP;PIDD1;…	Propofol	11	2.93155e-07	GABRE;CYP2C8;SCN4A;CYP2B6;GABRB1;GABRA6;GABRA4;GABRP;CYP2C9;UGT1A1;CYP2C19
post-embryonic animal morphogenesis	1	0.0280036	BAK1	regulation of sister chromatid segregation	19	0.000362042	IK;HNRNPU;TTK;BUB1;GEN1;ZNF207;NIPBL;PSMG2;MAD2L1;CTCF;CDC26;ANAPC4;TACC3;DDX11;FBXO5;MAD2L2;DLGAP5;PTTG1;SFPQ	MAP-kinase scaffold activity	1	0.0238166	AKAP13	ion gated channel activity	76	3.42623e-11	KCNE1;CHRNB2;SCN8A;GRIK5;GRIN2B;KCNQ2;KCNA1;KCNQ3;SCN11A;ANO5;CACNG3;GABRR2;KCNB2;GRIN2A;KCNH1;SCN5A;KCNK18;GLRA1;CACNG2;GABRB1;KCNT1;SCN10A;FAM155A;NALCN;GABRE;ANO2;OPRM1;RYR1;NMUR2;GABRB3;GABRP;CACNA2D4;TMEM63C;GLRA3;KCNT2;CHRNA4;GRID1;KCNG2;CACNA1A;KCNN1;CNGA2;PKD2L1;RYR3;TRPM2;GRIK3;GABRQ;GRIN3B;KCNE2;HCN4;KCNK2;GABRA3;CCT8L2;KCNG4;SCN4A;MTMR6;KCNA10;CACNA1E;CNR1;SNAP25;KCNIP3;CACNA1B;CACNA1I…	transcription factor binding	121	9.74599e-05	BBS7;PHF12;TLE1;NFKBID;SOX9;TAF6L;NFYB;FOXO3;BHLHE40;ARID1A;ZNF703;DDRGK1;NCOA6;RCOR2;DDIT3;PRDM5;E2F3;DRG1;DR1;NCAPG2;TAF10;FOXP1;CREM;HNRNPD;THRB;PPARA;ERCC3;MMS19;FAM89B;SMAD2;KEAP1;THRA;RNF4;UBE2I;METTL23;PIM1;PPARG;PURB;YWHAZ;APBB1;GSK3B;ID1;NR1I2;RCOR3;MLX;CPNE1;DDX3X;NCOA2;JUN;MDFIC;E2F5;PRPF6;KAT8;VHL;FOXO1;TFCP2;BCL3;ATOH8;TMEM173;GPX3;JUND;HDAC7;FOXA1;MEF2A;TAF4;NR4A2;SIN3A;TRIM11;ANKRD…	Temazepam	9	7.43839e-07	GABRE;CYP2C8;CYP2B6;GABRB1;GABRA6;GABRA4;GABRP;CYP2C9;CYP2C19
regulation of IRE1-mediated unfolded protein response	1	0.0280036	BAK1	ribosome assembly	16	0.00036554	RPL10;BOP1;MPV17L2;RPS14;RPL6;ABT1;RPS15;DHX30;RPSA;EIF2A;MTERF3;RPF2;SBDS;RPLP0;PPAN;NPM1	Quinacrine	1	0.0238166	HNMT	gated channel activity	77	5.06764e-11	KCNE1;CHRNB2;SCN8A;GRIK5;GRIN2B;KCNQ2;KCNA1;KCNQ3;SCN11A;ANO5;CACNG3;GABRR2;KCNB2;GRIN2A;KCNH1;SCN5A;KCNK18;GLRA1;CACNG2;GABRB1;KCNT1;SCN10A;FAM155A;NALCN;GABRE;ANO2;OPRM1;RYR1;NMUR2;GABRB3;GABRP;CACNA2D4;TMEM63C;GLRA3;KCNT2;CHRNA4;GRID1;KCNG2;CACNA1A;KCNN1;CNGA2;PKD2L1;RYR3;TRPM2;GRIK3;GABRQ;GRIN3B;KCNE2;HCN4;KCNK2;GABRA3;CCT8L2;KCNG4;SCN4A;MTMR6;KCNA10;CACNA1E;CNR1;SNAP25;KCNIP3;CACNA1B;CACNA1I…	positive regulation of RNA metabolic process	280	9.76411e-05	MED31;SMYD3;JADE1;SERTAD3;ACTR3;ERCC2;UBTF;LRP5L;SIX4;AGT;FZD8;PWP1;PHF10;SMARCD2;ICE2;SOX9;PATZ1;TAF6L;PF4;RLF;HIVEP3;ZNF345;ASF1A;HOXC10;SOX4;NFYB;MAGED1;MEX3D;FOXO3;STK16;UBE2L3;BCL9;CHEK2;HMGN1;CBFB;ERLIN2;ARID1A;ZNF496;KLF13;PLCB1;TNRC6A;ETV6;NCL;PRKD1;SQSTM1;DDRGK1;NCOA6;DDIT3;GAL;MLLT3;EGLN1;E2F3;CCAR1;PKNOX1;DR1;HEXB;ZNF639;GMEB1;TAF10;ACVR1;HOXC6;PAXIP1;SSBP4;CREM;SOX5;CNOT6;ZNF131;PHIP;…	Neuroactive ligand-receptor interaction	32	9.36468e-07	GABRE;GRIN2B;LHCGR;GRIN2A;ADCYAP1R1;CSH1;GRM6;GRIK3;TAAR8;HTR5A;OPRM1;GPR50;GRM5;NPBWR2;GABRB1;DRD5;HTR1E;HRH4;GLRA1;P2RX3;GABRA6;GABRA4;GRIK5;NMUR2;GRIA2;GABRP;MAS1;NPY5R;TRHR;SSTR3;HTR2A;HRH2
cardiac conduction system development	1	0.0280036	TBX3	cytoplasmic translation	21	0.000391662	EIF5;EIF3B;RPL30;RPL8;RPLP1;EEF2;RPL6;RPL31;ZC3H15;EIF3L;EIF4B;FTSJ1;DPH7;RPLP0;EIF3E;EIF3A;YTHDF2;RPL18A;EIF3J;RPL10A;EIF2S3	Suramin	1	0.0238166	ARSA	defense response	232	3.92953e-10	TARM1;CLEC4D;APOBEC1;MAS1;NLRP9;LILRA1;CLEC4C;NLRP4;NLRC4;SCRIB;LYZL2;S100A12;REG3G;LILRA4;ZNF175;PRG2;CCL4L1;COL20A1;SLAMF6;AICDA;IL17A;MARCO;IRF8;DMBT1;FPR1;CCL3;ADIPOQ;FGA;TLR2;HLA-DQA2;CD84;SLAMF1;CCL18;PGLYRP3;LCE3A;MUC16;VAMP3;MICB;MRGPRX1;NLRP10;A2M;CMKLR1;LYZL6;VSIG4;KLRG1;DEFA5;SERPINA1;CLEC12B;CD163;LPO;FPR3;LYZL1;FCGR2B;PHB;DEFB125;KRT1;SYT11;HLA-DPA1;DEFB123;GPR32;CD300LB;MS4A2;HMGB1;…	regulation of organelle organization	216	9.90064e-05	EPS8;ACTR3;TAPT1;CRIPT;VDAC3;TBC1D25;TBC1D22B;TOM1L1;TERF2;POT1;PFN1;BUB1;ARPC5;PHLDB2;TTK;ASF1A;ZNF207;UBE2L3;TBC1D10B;H3F3A;PLCB1;FMR1;ARHGDIB;ARHGAP18;MFN2;PRKD1;P2RX7;SQSTM1;CFL2;ATXN2L;MAP2;FES;POC1A;SEC24B;AURKA;PHF23;STAG2;TIGD5;PAXIP1;FMN1;BIK;CNOT6;PHIP;HNRNPD;BST1;FCHSD2;STMND1;CUL9;APC2;RBM14-RBM4;DYNLL1;GBA;KIF20B;TBC1D19;MID1;CDK5R1;NCK1;SYNE2;RNF4;SYNPO2L;EPGN;SETD5;YWHAG;XRCC3;ACD;…	integral component of plasma membrane	112	1.04119e-06	LCT;TRPC5;KIR3DL1;TLR2;PROKR2;KCNK9;GPR32;GABRE;ENPP7;GRIN2B;SLC6A2;DPP6;OTOP1;KCNB2;NRG1;LHCGR;CADM3;GRIN2A;ADCYAP1R1;AJAP1;LILRA4;SLC14A2;SLC1A6;GYPC;KCNA1;ADCY8;ASIC2;CLEC1A;GRM6;VWC2;SCN4A;CDH4;GRIK3;DPP10;NTRK3;C6;HTR5A;TPO;RGR;CEACAM5;OPRM1;LRRC8E;CXCR6;GPR50;KCNK18;OR3A2;GRM5;OR6T1;KCNQ3;NPBWR2;PCDH11Y;CLEC4M;GABRB1;C7;DRD5;NCF2;HTR1E;CMKLR1;SIGLEC7;CACNG2;HRH4;GLRA1;KCNA4;MMP16;KIR2DL4;P2…
positive regulation of protein import into nucleus, translocation	1	0.0280036	JAK2	protein kinase complex	23	0.000399964	CCNT1;CCNH;CKS2;CCNI;ERCC2;PRKAB1;PHKA2;SIK2;CDK9;CDK1;RB1CC1;PHKA1;ATG13;PHKG2;CCNK;PRKAR2A;CCND1;CAB39;TRIM40;BCCIP;PHKB;GTF2H1;TBC1D5	cofactor metabolic process	5	0.0238551	NUDT7;ACOT2;NAPRT;GSTM5;FBP1	integral component of plasma membrane	241	5.48149e-10	RNF31;KCNE1;TRHR;CHRNB2;SLC22A2;OR3A2;MAS1;SCN8A;GRIK5;PROKR2;TAS1R2;SCRIB;GRIN2B;SLC10A2;LILRA4;KCNQ2;AJAP1;KCNA1;OR10H2;KCNQ3;MARCO;HTR2A;GRM6;ADAM29;SCN11A;HRH2;SLC8A3;TLR2;HLA-DQA2;CD84;MS4A1;DCC;CACNG3;PTPRO;TMPRSS9;SLC35A1;GABRR2;KCNB2;CD33;DPP10;GRIN2A;KCNH1;SCN5A;LCT;IFITM5;ADRA1B;CEACAM4;KCNK18;OR6T1;GPR1;OR10H5;TRPC4;ATP2B2;CMKLR1;RASGRP3;ADCYAP1R1;NOX3;GPR50;HCRTR2;NPFFR2;EDA2R;OR56A5;…	Metabolic pathways	225	9.9465e-05	DHRS4;ADK;ATIC;COX7C;MTR;ALDOA;NT5M;PTS;APIP;COX11;UCKL1;MGAT4C;DHRS3;FAHD1;CHDH;CTPS2;NME4;GBE1;TSTA3;ALG12;B4GALNT4;B3GNT5;GLCE;GALNT4;PMVK;C1GALT1C1;PMM1;CHSY3;ETNPPL;MGAT4A;UGDH;XYLT2;B4GALT3;PAFAH1B2;APRT;ETNK1;PLCB1;DCTD;GYG1;ALG13;CYP2R1;SDHC;NDUFS4;PAPSS2;MTMR1;G6PD;PLCG1;EXTL3;OCRL;ATP6V1B2;ASNS;B4GALT6;B3GNT4;AADAT;HEXB;KDSR;ENO3;DLAT;POMK;MPI;BST1;CERS2;IDH3G;NT5C1B;PGK1;ST3GAL3;NME1-N…	anterograde trans-synaptic signaling	59	1.16751e-06	JAK2;GABRE;GRIN2B;SLC6A2;GRIN2A;TNR;SLC1A6;KCNA1;OPHN1;ADCY8;ASIC2;GRM6;AMPH;WNT7A;GRIK3;NPAS4;PRKCB;HTR5A;OPRM1;RIMBP2;GRM5;OR6T1;KCNQ3;GABRB1;GAD2;DRD5;HTR1E;CACNG2;HRH4;GLRA1;P2RX3;JPH3;SORCS3;GABRA6;DBH;FGF14;CACNG3;EPHB1;GABRA4;SLC17A6;GRIK5;GRIA2;GABRP;NAPB;CDH8;SLC6A9;SLC5A7;OR56A5;KCNQ2;NPS;NPY5R;NCDN;SYT10;CACNA1A;HTR2A;NTF3;HRH2;DCC;IGSF9B
keratinocyte development	1	0.0280036	IFT74	regulation of DNA metabolic process	64	0.000411518	MAPK1;HNRNPU;FGF2;NUDT16L1;RFC5;ST20;GNL3;HRAS;ERCC2;MEN1;HNRNPC;WAS;APAF1;CCT4;RPS3;HMGB1;STOX1;CDK9;CEBPG;APOBEC1;FANCB;CDK1;RAD17;CCT6A;ANKRD1;CHEK2;HIST1H1C;RNF8;SH2B1;RNF168;JUN;PPP4R2;NABP2;DPPA3;PTGES3;APLF;PCNA;ERCC6;CCT7;ZNF304;MPHOSPH8;DDX11;FBXO5;DBF4;BABAM1;SMG5;PARP4;RFC4;H2AFX;MAD2L2;TRIP12;RLF;OTUD4;USP1;SUPT6H;TERF2IP;MAS1;NPM1;RTEL1;UIMC1;HMGA2;RFC3;MSH2;AUNIP	peroxisome organization	2	0.0241761	NUDT7;ACOT2	intrinsic component of plasma membrane	250	6.93583e-10	RNF31;KCNE1;TRHR;CHRNB2;SLC22A2;OR3A2;MAS1;SCN8A;GRIK5;PROKR2;TAS1R2;SCRIB;GRIN2B;SLC10A2;PRMT8;LILRA4;KCNQ2;AJAP1;KCNA1;OR10H2;KCNQ3;MARCO;HTR2A;GRM6;ADAM29;SCN11A;HRH2;SLC8A3;TLR2;HLA-DQA2;CD84;MS4A1;DCC;CACNG3;PTPRO;TMPRSS9;SLC35A1;GABRR2;KCNB2;CD33;DPP10;GRIN2A;KCNH1;SCN5A;LCT;IFITM5;ADRA1B;CEACAM4;KCNK18;OR6T1;GPR1;OR10H5;TRPC4;ATP2B2;CMKLR1;RASGRP3;ADCYAP1R1;NOX3;GPR50;HCRTR2;NPFFR2;EDA2R;O…	pyrimidine-containing compound metabolic process	28	0.000105382	NT5M;UCKL1;CTPS2;NME4;HDDC2;NEIL2;CDADC1;NME9;DCTD;ENTPD4;UCK1;TK2;RRM1;PRPS1;NME1;CDIPT;CDS2;CMPK2;AK3;TK1;CDA;SLC19A3;UPP1;SHMT1;APOBEC3C;DTYMK;NEIL1;TET1	trans-synaptic signaling	59	1.6959e-06	JAK2;GABRE;GRIN2B;SLC6A2;GRIN2A;TNR;SLC1A6;KCNA1;OPHN1;ADCY8;ASIC2;GRM6;AMPH;WNT7A;GRIK3;NPAS4;PRKCB;HTR5A;OPRM1;RIMBP2;GRM5;OR6T1;KCNQ3;GABRB1;GAD2;DRD5;HTR1E;CACNG2;HRH4;GLRA1;P2RX3;JPH3;SORCS3;GABRA6;DBH;FGF14;CACNG3;EPHB1;GABRA4;SLC17A6;GRIK5;GRIA2;GABRP;NAPB;CDH8;SLC6A9;SLC5A7;OR56A5;KCNQ2;NPS;NPY5R;NCDN;SYT10;CACNA1A;HTR2A;NTF3;HRH2;DCC;IGSF9B
ectodermal placode formation	1	0.0280036	TBX3	serine/threonine protein kinase complex	20	0.000412085	CCNT1;CCNH;CKS2;CCNI;ERCC2;PHKA2;CDK9;CDK1;RB1CC1;PHKA1;ATG13;PHKG2;CCNK;CCND1;CAB39;TRIM40;BCCIP;PHKB;GTF2H1;TBC1D5	vacuolar part	5	0.0248626	NAPRT;FMOD;ARSA;CTSK;LYZ	transmembrane transporter complex	71	7.68142e-10	KCNE1;CHRNB2;SCN8A;GRIK5;SCRIB;GRIN2B;KCNQ2;KCNA1;KCNQ3;SCN11A;CACNG3;GABRR2;BEST2;KCNB2;DPP10;GRIN2A;KCNH1;SCN5A;TRPC4;GLRA1;CACNG2;GABRB1;SCN10A;GABRE;ANO2;RYR1;GABRB3;GABRP;CACNA2D4;GLRA3;CHRNA4;TRPC7;TRPC3;KCNG2;CATSPERG;CACNA1A;KCNN1;PKD2L1;RYR3;LRRC18;DPP6;GRIK3;GABRQ;GRIN3B;KCNE2;HCN4;KCNK2;TRPC6;GABRA3;KCNG4;SCN4A;KCNA10;OLFM3;CACNA1E;SNAP25;KCNIP3;CACNA1B;CACNA1I;KCND3;KCNIP1;CNGB3;RYR2;…	chromosomal part	160	0.000110503	DYNLT3;ACTR3;PHF12;BRD9;PHF10;GAR1;ETV3;SMARCD2;UBE2A;TERF2;ICE2;POT1;BUB1;ARPC5;TTK;BIRC5;TTI2;ASF1A;MAGED1;ZNF207;MPHOSPH8;THOC3;CHEK2;HMGN1;H3F3A;RFC3;STAG3;ARID1A;PLCB1;FMR1;ERCC5;CHMP7;MXD1;ITGB3BP;RBBP4;H2AFX;SATB1;SEH1L;AURKA;CENPU;HMGN2;NCAPG2;STAG2;NEDD4;CHAMP1;NDE1;ZWINT;THRB;DCTN5;NABP1;DYNLL1;SPC25;SMAD2;HP1BP3;SMARCD1;UBE2I;XRCC3;ACD;PURB;RAD9B;PBRM1;CHRAC1;CHTF8;SPC24;PHF2;XPO1;NUP4…	intrinsic component of plasma membrane	115	2.01231e-06	LCT;TRPC5;KIR3DL1;TLR2;PROKR2;KCNK9;GPR32;GABRE;ENPP7;GRIN2B;SLC6A2;DPP6;OTOP1;KCNB2;NRG1;LHCGR;CADM3;GRIN2A;ADCYAP1R1;AJAP1;LILRA4;SLC14A2;SLC1A6;GYPC;KCNA1;ADCY8;ASIC2;CLEC1A;GRM6;VWC2;SCN4A;CDH4;GRIK3;DPP10;NTRK3;C6;HTR5A;TPO;RGR;CEACAM5;OPRM1;LRRC8E;CXCR6;GPR50;KCNK18;OR3A2;GRM5;OR6T1;KCNQ3;NPBWR2;PCDH11Y;CLEC4M;GABRB1;C7;DRD5;NCF2;HTR1E;CMKLR1;SIGLEC7;CACNG2;TEX101;HRH4;GLRA1;KCNA4;MMP16;KIR…
ectodermal placode morphogenesis	1	0.0280036	TBX3	regulation of chromosome organization	54	0.000449451	IK;MAPK1;TLK1;HNRNPU;TTK;RNF4;KMT2B;GNL3;BUB1;GEN1;C6orf89;ZNF207;NIPBL;IWS1;PSMG2;HNRNPC;PADI2;TOP2A;PHF2;ZNF451;IGF2;CCT4;PRKD1;PYGO2;MAD2L1;GCG;CDK9;APOBEC1;CTCF;CCT6A;HIST1H1C;CDC26;NABP2;MIER1;ANAPC4;CCT7;ZNF304;TACC3;KMT2E;DDX11;FBXO5;DMRTC2;NOC2L;SMG5;MAD2L2;DLGAP5;WBP2;TRIP12;PTTG1;SUPT6H;TERF2IP;RTEL1;SFPQ;PRMT6	protein folding	3	0.0253213	NGLY1;CDC37L1;UNC45A	cell surface	136	8.13822e-10	KCNE1;ANTXR1;CHRNB2;IGSF5;MAS1;WNT7A;BSN;CTSV;BMP10;GRIN2B;ROBO2;BTNL9;AJAP1;KCNA1;KCNQ3;CLEC17A;DMBT1;ADIPOQ;FGA;TLR2;SLAMF1;MS4A1;BSPH1;CXCR1;VAMP3;BTNL8;MICB;ASTN1;CD33;GRIN2A;KCNH1;SCN5A;MRGPRX1;TRPC4;LYZL6;ADCYAP1R1;GLRA1;CLEC12B;CD163;CACNG2;CEACAM8;FCGR2B;PHB;HLA-DPA1;MS4A2;HMGB1;BMP2;CDH8;HLA-DPB1;GFRAL;MMP16;FCN1;FCGR3A;CD200R1;TMEM206;FGG;PDGFC;CD3G;ITGA7;MSN;FCRL4;CD1A;TNFRSF9;CHRNA4;L…	sequence-specific double-stranded DNA binding	150	0.00011516	SMYD3;UBTF;SIX4;KLF3;ETV3;SMARCD2;KDM5B;LRRFIP1;SOX9;PATZ1;HOXC10;SOX4;BATF3;NFYB;GZF1;FOXO3;BHLHE40;H3F3A;KLF13;ETV6;NONO;ZNF658;MXD1;RBBP4;SATB1;DDIT3;PRDM5;E2F3;CCAR1;ZNF639;GMEB1;HOXC6;SSBP4;CREM;ZNF131;HNRNPD;THRB;TXK;PPARA;SMAD2;ETV4;THRA;SMAD1;NRF1;PPARG;PURB;KLF7;GMEB2;KLF10;ZBTB5;DMRT1;NR1I2;MLX;TAL2;HOXB2;BACH2;UHRF1;NCOA2;NME1;JUN;NKRF;TOX3;SNAI2;PCGF5;SMAD5;ORC5;HOXC11;ZNF239;NFE2L3;I…	Methoxyflurane	9	3.10189e-06	GABRE;KCNA1;CYP2B6;GABRB1;GLRA1;GABRA6;GABRA4;GABRP;CYP2C9
substrate-independent telencephalic tangential migration	1	0.0280036	ARX	protein-containing complex assembly	233	0.000466655	EPS8;PRTG;PDCD6;KRT1;PFDN6;HJURP;DHRS4;EIF5;RPL10;CCNH;BOP1;CENPU;ARF1;EIF3B;GBA;MSRB1;YWHAB;ATXN2L;FKBP1A;CNOT6;BRD2;USP50;GSK3B;RBM5;EIF2AK2;SEC24D;CHAF1A;TTN;RNF4;TRAPPC4;PLAGL2;HTRA2;HSPD1;APIP;TTC19;NDUFS6;CHRNB2;HLA-DMB;TXNL4A;DICER1;MCU;HRAS;SF1;PRPF6;PSMD9;NUDT21;SCAF11;MPV17L2;SNRNP200;RPS14;ERCC2;PRKAB1;ZNF207;SPTB;ARPC4;LSM14A;ATAT1;P4HB;HIST1H4G;NDUFA6;RPL6;BAD;SHMT1;PSMG2;MEN1;KMT2D;…	head development	6	0.0257872	BAK1;BTG2;ARX;HNMT;FANCC;SOX9	Neuroactive ligand-receptor interaction	63	1.46657e-09	TRHR;CHRNB2;MAS1;GRIK5;GRIN2B;HTR2A;GRM6;FPR1;TAAR9;HRH2;GABRR2;TAAR6;GRIN2A;ADRA1B;ADCYAP1R1;GPR50;HCRTR2;NPFFR2;GLRA1;FPR3;GABRB1;TSHB;TAAR5;GABRE;OPRM1;RXFP2;CHRM3;HTR1E;NMUR2;GABRB3;GABRP;TAAR2;GLRA3;CCKBR;CHRNA4;GRID1;MC2R;RXFP1;BDKRB1;NPY1R;MC4R;GABBR2;LHCGR;GRIK3;GABRQ;GRIN3B;HTR5A;PLG;BDKRB2;GABRA3;NPY5R;CYSLTR2;CNR1;HRH1;TACR3;HTR4;GLP2R;TAAR8;P2RX3;PTGIR;C5AR1;CSH1;CTSG	chromatin organization	137	0.000117175	SMYD3;JADE1;BRD9;PWP1;PHF10;RCBTB1;SMARCD2;KDM5B;UBE2A;SOX9;TAF6L;RLF;ASF1A;BRPF3;HMGN1;H3F3A;NAA50;ARID1A;FMR1;PRKD1;ITGB3BP;RBBP4;H2AFX;SATB1;HDAC10;MSL1;PRDM5;AURKA;DR1;CENPU;BCORL1;TAF10;PAXIP1;RBM14-RBM4;HIRIP3;MRGBP;HP1BP3;SMARCD1;ANP32B;SETD5;TBL1XR1;PBRM1;APBB1;CHRAC1;RTF1;PHF2;SIRT5;PADI4;NPM2;UHRF1;UBR2;ATXN7L3;BRMS1L;BRD2;KAT8;SNAI2;PCGF5;ATRX;USP51;ATXN7;SAFB;RNF168;DYDC1;C6orf89;TOP1…	defense response to other organism	44	3.93433e-06	DEFB4B;DEFB105A;DEFB104A;SPAG11B;S100A14;TLR2;IRF8;AICDA;IRGM;DHX58;IFITM3;LCE3A;DEFB107A;SPON2;DEFA5;DMBT1;NLRP9;S100A9;DEFB124;FGA;CLEC4D;DEFB106A;AIM2;S100A12;DEFB128;LALBA;LPO;LILRB1;COTL1;SYK;ZC3HAV1;RIOK3;NLRP1;MPO;DEFB123;DEFB115;IFNA4;PRF1;FGB;PGLYRP3;DEFB116;NLRP10;CRP;LYZL2
substrate-independent telencephalic tangential interneuron migration	1	0.0280036	ARX	translation factor activity, RNA binding	20	0.000483743	EIF5;EIF2S2;EIF3B;EIF4A1;EIF4G2;EIF2B1;EEF2;EIF2B4;EEF1D;EIF1AX;COPS5;EIF3L;EIF4B;EIF2A;EIF2B2;EIF3E;EIF3A;EIF3J;EIF2S3;EIF1	neuron projection organization	2	0.0258869	ARHGAP33;CUX2	structural molecule activity	136	1.90496e-09	LOR;BSN;COPB1;NPAP1;ENAM;TUBB3;MYOM2;CTNNA2;KRT6C;C1orf68;PRG2;MXRA5;ADIPOQ;FGA;COL4A1;MFAP5;LCE3A;COL6A3;LCE1A;NUP88;KRT84;LCE2D;MAGI3;PRG3;COL4A2;MAGI2;CSRP3;RPL37A;KRT1;RPL5;MRPL51;NEFM;KRT6A;KRTAP11-1;SPTB;RPL22L1;COL5A1;FGG;RPL10L;KRT76;MYOM1;SPRR4;ANK2;CD3G;OC90;NEB;RPL6;MSN;ACAN;DCN;COL6A5;KRT75;RPL31;LCE2C;MUC5AC;LCE2B;EDIL3;KRT74;EIF3B;LELP1;HAPLN1;LCE4A;SEC13;COPA;MRPL24;MYBPC2;SPRR3;RP…	nucleoside phosphate biosynthetic process	72	0.000117513	ADK;ATIC;PRPSAP2;ALDOA;UCKL1;CTPS2;NME4;HDDC2;CDADC1;SLC35B3;NME9;SLC25A1;APRT;DCTD;P2RX7;PAPSS2;ENO3;DLAT;ADCY3;PGK1;PPARA;PNP;MTHFD2L;UCK1;ENO2;PDK1;KARS;TK2;AK7;GAPDH;PPCS;RRM1;RNLS;PRPS1;ZBTB20;SLC25A12;NME1;EIF6;LDHC;CDS2;ACAT1;SLC26A2;ENO4;CMPK2;GALK1;PRKAG2;NAPRT;AK4;AK3;SLC25A13;PGAM1;TK1;CYC1;GUK1;UPP1;ADPGK;HDAC4;PRPSAP1;PFKFB1;SHMT1;FBP1;DTYMK;SCD5;PID1;PARP16;ENO1;ADSS;SUCLG1;ELOVL2;D…	Quazepam	8	4.21909e-06	GABRE;CYP2B6;GABRB1;GABRA6;GABRA4;GABRP;CYP2C9;CYP2C19
manganese ion transport	1	0.0280036	TRPC5	mitochondrial envelope	103	0.000489241	SLC25A24;PEBP1;VRK2;DTYMK;UQCRFS1;MCUR1;SLC25A53;SDHC;CHCHD4;MRPS25;FKBP8;CYC1;MRPL28;AURKAIP1;HTRA2;HSPD1;TTC19;UQCR11;NDUFS6;MCU;MRPL37;CHCHD5;SLC25A10;AGPAT4;MPV17L2;RNF144B;SLC25A30;NDUFA4;SLC25A5;UQCRH;NDUFA6;SOD1;BAD;SLC25A3;IMMT;MRPL9;MRPL51;PPP2R2B;ATXN3;SLC25A44;MTG1;THOP1;SLC25A43;NDUFAF4;RPS3;MRPL24;SLC11A2;GOT2;MICU3;SLC25A14;MRPL1;DUSP18;GHITM;NDUFV2;NDUFB9;RTN4IP1;TIMM10B;COX15;MRPL…	actin crosslink formation	1	0.0267543	ACTN1	transporter complex	71	2.32978e-09	KCNE1;CHRNB2;SCN8A;GRIK5;SCRIB;GRIN2B;KCNQ2;KCNA1;KCNQ3;SCN11A;CACNG3;GABRR2;BEST2;KCNB2;DPP10;GRIN2A;KCNH1;SCN5A;TRPC4;GLRA1;CACNG2;GABRB1;SCN10A;GABRE;ANO2;RYR1;GABRB3;GABRP;CACNA2D4;GLRA3;CHRNA4;TRPC7;TRPC3;KCNG2;CATSPERG;CACNA1A;KCNN1;PKD2L1;RYR3;LRRC18;DPP6;GRIK3;GABRQ;GRIN3B;KCNE2;HCN4;KCNK2;TRPC6;GABRA3;KCNG4;SCN4A;KCNA10;OLFM3;CACNA1E;SNAP25;KCNIP3;CACNA1B;CACNA1I;KCND3;KCNIP1;CNGB3;RYR2;…	microtubule-based process	135	0.000121696	KIF27;IGBP1;ACTR3;CRIPT;SDCCAG8;BBS12;CABYR;PARD6G;TERF2;TTL;MAP10;COPG2;TUBB;PHLDB2;FIGNL1;TTK;DYNLRB2;ZNF207;WEE1;CHEK2;FMR1;BLOC1S2;MAP2;BLOC1S3;FES;ARHGAP21;POC1A;AURKA;STAG2;SRGAP2;NDE1;HSPB11;STMND1;CUL9;CCDC78;APC2;RBM14-RBM4;CFAP20;DNHD1;DYNLL1;TUBGCP3;SPC25;GTSE1;KIF20B;MID1;CDK5R1;SYNE2;RNF4;DNAH8;XRCC3;GAPDH;KIF5C;GSK3B;XPO1;CEP295;IFT122;KIF2A;KIF24;GEN1;DLG2;DYNC2H1;MAP7D2;FLOT2;MARK…	Ketobemidone	7	4.62844e-06	GRIN2B;GRIN2A;CYP2C8;CYP2B6;OPRM1;CYP2C9;CYP2C19
palmitoyl-CoA hydrolase activity	1	0.0280036	ACOT2	cadherin binding	52	0.000494329	SCRIB;EIF5;YWHAB;ATXN2L;EIF4G2;TRPC4;FNBP1L;AHSA1;PAICS;ARFIP2;IDH1;EEF2;YWHAZ;RPL6;EEF1D;ATIC;PFN1;ZC3H15;CAPZA1;HSPA8;CDH17;ANLN;FLNB;CTNNA2;TMOD3;RDX;DBNL;PUF60;VAPB;NOP56;EIF2A;CLIC1;PSMB6;F11R;RANBP1;EXOC3;BZW1;RPS2;ANK3;PTPN1;EIF3E;STX5;RANGAP1;JUP;CSNK1D;SWAP70;PTPRM;EIF2S3;ENO1;TMPO;CDH6;CRKL	regulation of extracellular matrix assembly	1	0.0267543	SOX9	defense response to bacterium	56	2.74368e-09	CLEC4D;NLRC4;LYZL2;S100A12;REG3G;PRG2;AICDA;IRF8;DMBT1;FGA;TLR2;PGLYRP3;LCE3A;NLRP10;LYZL6;DEFA5;LPO;LYZL1;DEFB125;SYT11;DEFB123;KRT6A;DEFA1;DEFA4;RNASE2;S100A9;S100A8;FCN2;DEFB127;RNASE3;IGLL5;DEFB115;DEFA6;CLEC4E;FGB;DEFB128;IRGM;NR1H4;PGLYRP4;DEFB116;DEFB118;LALBA;MPO;LCE3C;RPL30;LYPD8;BPIFA1;DEFB135;DEFB121;MMP7;S100A7;DEFB124;ARG2;C5AR1;SIGLEC11;CTSG	regulation of cellular amide metabolic process	79	0.000123952	MIF4GD;EIF2AK2;SECISBP2L;RNF139;RPL10;EIF4G3;DPH7;IGF2BP2;SOX4;CNOT10;UPF3A;MEX3D;SRP9;EIF1;FOXO3;FMR1;TNRC6A;NCL;DNAJC24;EIF5;EIF4E3;IMPACT;PUS7;LSM14B;MAGOH;EPHA4;CNOT6;HNRNPD;CASP3;NSMAF;CAPRIN2;LARP4B;RPS27L;SORL1;DDX1;CIRBP;PDK1;NCK1;FAM129A;GAPDH;CDC123;MTG1;DDX3X;DHX29;UQCC1;KHSRP;EIF6;EIF2B4;NGDN;DHFR;KLHL25;BCL3;MAPK3;MKNK1;PGAM1;YTHDF3;AGO2;EIF3K;DHX9;PER2;NOLC1;EIF4G2;EIF3H;RPUSD3;PTAF…	Pentobarbital	9	5.75962e-06	GABRE;GRIN2B;GRIN2A;GABRB1;GABRA6;GABRA4;GRIA2;GABRP;CYP2C19
divalent inorganic cation homeostasis	4	0.0288212	JAK2;BAK1;S100A14;TRPC5	nuclear envelope	70	0.000495123	RBM15B;TMEM18;RANBP2;KPNB1;CUEDC2;TMEM33;KPNA4;ADRA1B;TXNL4A;PCYT1A;SLC29A2;TUBB;YBX1;DCTN5;KCNH1;RTCB;LMNB2;SLC30A1;XPO4;ROGDI;ENY2;MAD2L1;PSEN2;EI24;RB1CC1;NUP88;IPO9;OIT3;CHMP2A;INTS5;NUTF2;BNIP2;RNF6;NLRP6;POM121;CLIC1;LRPPRC;RBM15;UBXN4;ACKR2;MTMR6;RANBP1;SEC13;MLX;MATR3;SUN3;MGST3;XPO1;SPAG4;NUP210L;TERF2IP;PUM2;TXLNG;RANGAP1;SUMO1;NUP155;IPO4;ZC3HC1;PLCB1;SUN2;EBP;CHMP7;NPC1;MAD2L1BP;CEP70…	stem cell fate commitment	1	0.0267543	SOX9	peptide cross-linking	23	1.08961e-08	LOR;C1orf68;LCE3A;LCE1A;LCE2D;KRT1;SPRR4;DCN;LCE2C;LCE2B;LELP1;LCE4A;SPRR3;IVL;SPRR2D;LCE1B;SPRR2B;SPRR1B;SPRR2F;LCE3C;SPRR2E;SPRR2A;SPRR1A	aminoglycan biosynthetic process	30	0.000125735	HS2ST1;B3GNT5;GLCE;CHSY3;UGDH;XYLT2;B4GALT3;B4GALT6;B3GNT4;B3GNT9;FMOD;ST3GAL3;EXT2;CHST13;GALNT5;UST;GPC4;GPC6;SDC2;HS6ST1;PXYLP1;SLC35D2;B4GALT2;SLC35D1;HEXA;ANGPT1;CHPF2;HS3ST3B1;ST3GAL4;CSPG5	Halothane	10	6.00091e-06	KCNK9;GABRE;GRIN2A;CYP2B6;GABRB1;GLRA1;GABRA6;GABRA4;GABRP;CYP2C9
determination of left/right symmetry	2	0.0302309	IFT74;TBX3	nucleobase-containing compound transport	41	0.000511642	SLC25A24;RBM15B;SRSF11;SLC35A2;HNRNPU;U2AF2;RANBP2;SRSF3;MAGOH;UPF2;SLC29A2;IWS1;SLC25A5;THOC3;KIF5C;ENY2;RPS15;KHSRP;ARC;ATXN2;NUP88;CPSF3;SLC35B2;NUTF2;HNRNPA3;RPSA;POM121;SLC25A36;LRPPRC;SEC13;SMG5;XPO1;SUPT6H;NPM1;NUP155;SLC35A1;SLC35B4;BCCIP;NUP133;SFPQ;NUP98	regulation of protein heterodimerization activity	1	0.0267543	BAK1	cornified envelope	24	1.25145e-08	LOR;TCHH;C1orf68;LCE3A;LCE1A;LCE2D;KRT1;SPRR4;SCEL;LCE2C;LCE2B;LELP1;LCE4A;SPRR3;IVL;SPRR2D;LCE1B;SPRR2B;SPRR1B;SPRR2F;LCE3C;SPRR2E;SPRR2A;SPRR1A	regulation of translation	70	0.000126101	MIF4GD;EIF2AK2;SECISBP2L;RNF139;RPL10;EIF4G3;DPH7;IGF2BP2;SOX4;CNOT10;UPF3A;MEX3D;SRP9;EIF1;FOXO3;FMR1;TNRC6A;NCL;DNAJC24;EIF5;EIF4E3;IMPACT;PUS7;LSM14B;MAGOH;CNOT6;HNRNPD;CAPRIN2;LARP4B;RPS27L;DDX1;CIRBP;NCK1;FAM129A;GAPDH;CDC123;MTG1;DDX3X;DHX29;UQCC1;KHSRP;EIF6;EIF2B4;NGDN;DHFR;KLHL25;BCL3;MAPK3;MKNK1;YTHDF3;AGO2;EIF3K;DHX9;PER2;NOLC1;EIF4G2;EIF3H;RPUSD3;PTAFR;UQCC2;SHMT1;AKT2;EIF2AK3;MPV17L2;…	Nicotine addiction	10	7.6822e-06	GABRE;GRIN2B;GRIN2A;GABRB1;GABRA6;GABRA4;SLC17A6;GRIA2;GABRP;CACNA1A
positive regulation of T cell receptor signaling pathway	1	0.0303023	CD226	chromosomal region	54	0.000521724	HJURP;CENPU;HNRNPU;ORC1;TTK;MCM6;SPC25;BUB1;ZNF207;DCTN5;SUMO3;MEN1;THOC3;PHF2;MAD2L1;PSEN2;KIF18A;CBX1;CDK1;RAD17;APEX1;CTCF;CHEK2;DYNLL1;RNF8;GAR1;CENPT;NABP2;STAG3;PTGES3;H2AFY2;PCNA;DCTN3;TELO2;CENPL;NSMCE1;SEC13;CENPW;H2AFX;XPO1;BOD1L2;PDS5B;NGDN;CHAMP1;TERF2IP;RANGAP1;DCLRE1A;RTEL1;SUN2;MSH2;NUP133;POLD1;NUP98;ZBTB48	epithelial cell proliferation involved in lung morphogenesis	1	0.0267543	SOX9	innate immune response	135	5.3898e-08	TARM1;CLEC4D;NLRP9;CLEC4C;NLRC4;SCRIB;S100A12;REG3G;LILRA4;CCL4L1;COL20A1;SLAMF6;MARCO;IRF8;DMBT1;CCL3;FGA;TLR2;HLA-DQA2;CD84;SLAMF1;CCL18;PGLYRP3;MUC16;VAMP3;MICB;NLRP10;A2M;VSIG4;KLRG1;DEFA5;CLEC12B;FCGR2B;DEFB125;KRT1;HLA-DPA1;DEFB123;CD300LB;HMGB1;AIM2;DEFA1;HLA-DPB1;FCN1;DEFA4;CCL7;SYNCRIP;FGG;CD300E;OTOP1;IL21;SIGLEC10;CCL8;IL18RAP;CCL11;PLCG2;S100A9;LILRB1;HLA-DQA1;HLA-F;MUC5AC;S100A8;PYHI…	cellular protein catabolic process	136	0.000127151	BBS7;RNF217;RNF139;ATE1;UBE2A;TOM1L1;CDC34;USP18;TRIM25;FBXL4;PCYOX1;UBE2L3;RNF103;KCTD10;CHEK2;USP47;ERLIN2;N4BP1;USP11;DNAJB9;FMR1;HSP90AA1;SQSTM1;DDRGK1;ITCH;DDIT3;PTTG1IP;STYX;AURKA;ANKZF1;NEDD4;USP45;EPHA4;USP12;RNF187;FBXW4;CUL9;AMER1;GBA;AP2B1;UGGT1;CHFR;ZFAND2B;KEAP1;RNF150;FBXL12;RNF4;CBLC;UBE2I;FBXO2;TBL1XR1;UBE2K;MDM2;FBXL5;BNIP3L;GSK3B;BIRC6;NPLOC4;CTSO;FHIT;UBA6;UHRF1;UBR2;PTTG1;FBXO…	Acamprosate	8	8.59226e-06	GABRE;GRIN2B;GRIN2A;GRM5;GABRB1;GABRA6;GABRA4;GABRP
regulation of skeletal muscle satellite cell proliferation	1	0.0303023	JAK2	maturation of LSU-rRNA	8	0.000528672	BOP1;RPL35;URB1;MRPL1;FTSJ3;RPF2;ZNHIT6;RPL10A	hypotonic response	1	0.0267543	ITGA2	plasma membrane protein complex	99	6.37538e-08	RNF31;KCNE1;GJA10;CHRNB2;SCN8A;GRIK5;SCRIB;GRIN2B;LILRA4;KCNQ2;GNG2;KCNA1;KCNQ3;SCN11A;TLR2;HLA-DQA2;CACNG3;APBB1IP;KCNB2;DPP10;GRIN2A;KCNH1;SCN5A;HLA-DOB;NOX3;CACNG2;HLA-DPA1;SCN10A;MS4A2;HMGB1;BMP2;CDH8;HLA-DPB1;SGCZ;RYR1;CD3G;CACNA2D4;IL18RAP;ITGA7;GLRA3;LIN7C;HTRA2;GJB4;TBC1D5;CHRNA4;CDH4;HLA-DQA1;HLA-F;KCNG2;GNGT2;GJA8;CATSPERG;CDH17;CACNA1A;GABBR2;KCNN1;DPP6;GNA15;GRIK3;GRIN3B;KCNE2;EVC2;HC…	ribonucleoside diphosphate metabolic process	28	0.000127489	ALDOA;P2RX7;NUDT16;ENO3;ENTPD4;PGK1;PPARA;ENO2;GAPDH;ZBTB20;SLC25A12;DLG2;EIF6;ENO4;BAD;GALK1;PRKAG2;AK4;AK3;PGAM1;GUK1;ADPGK;HDAC4;PFKFB1;FBP1;ENO1;INSR;ECD	Mephenytoin	5	8.91783e-06	CYP2C8;CYP2B6;SCN5A;CYP2C9;CYP2C19
positive regulation of endoplasmic reticulum unfolded protein response	1	0.0303023	BAK1	protein citrullination	4	0.000529301	PADI1;PADI2;PADI3;PADI4	short-term memory	1	0.0267543	CUX2	immune response	269	7.37305e-08	RNF31;TARM1;CLEC4D;AGA;REG1B;APLF;NLRP9;COPB1;LILRA1;MS4A3;CLEC4C;NLRC4;SCRIB;SRP14;S100A12;REG3G;LAIR2;LILRA4;PRG2;CCL4L1;BTNL9;COL20A1;SLAMF6;AICDA;IL17A;MARCO;IRF8;CPPED1;DMBT1;IL7;FPR1;CCL3;ARHGAP9;FGA;HRH2;TLR2;HLA-DQA2;CD84;SLAMF1;CCL18;MS4A1;PGLYRP3;CXCR1;MUC16;FTL;APBB1IP;VAMP3;BTNL8;MICB;CD33;NLRP10;PRKCB;CLC;A2M;PRG3;HLA-DOB;CMKLR1;VSIG4;KLRG1;DEFA5;SERPINA1;CLEC12B;FPR3;CEACAM8;FCGR2B;…	small molecule biosynthetic process	134	0.000132073	HINT1;ADK;ADAL;ATIC;MTR;LPL;ALDOA;NT5M;PTS;SLC35B4;APIP;UCKL1;GPD2;CTPS2;NME4;NEIL2;PMVK;NME9;NFYB;SLC25A1;UGDH;APRT;ERLIN2;CYP2R1;PLOD2;P2RX7;G6PD;NUDT16;ABCD3;ASNS;ARV1;ENO3;DHDDS;ENTPD4;CYP2D6;NUDT11;PGK1;PPARA;PNP;GBA;OSBPL6;MTHFD2L;UCK1;NT5C1B-RDH14;ADIPOR1;BMP6;ENO2;COQ10B;ITPKB;PLOD1;TK2;CBR4;PHGDH;ADI1;GAPDH;CYP51A1;LEPR;FPGS;SIRT5;UST;PRPS1;ZBTB20;PDE8B;SLC25A12;NME1;SNAI2;EIF6;SDS;FOXO1…	transmembrane transporter complex	33	9.9884e-06	CATSPER2;TRPC5;RYR3;GABRE;GRIN2B;DPP6;KCNB2;GRIN2A;KCNA1;VWC2;SCN4A;GRIK3;DPP10;LRRC8E;KCNQ3;GABRB1;CACNG2;GLRA1;KCNA4;KCNIP4;CNGB3;KCNV1;GABRA6;CACNG3;GABRA4;GRIK5;GRIA2;GABRP;SCN5A;SCN11A;KCNQ2;CACNA1A;CATSPER1
regulation of response to tumor cell	1	0.0303023	CD226	histone citrullination	4	0.000529301	PADI1;PADI2;PADI3;PADI4	skin morphogenesis	1	0.0267543	ITGA2	regulation of immune response	145	7.429e-08	RNF31;CLEC4D;APLF;LILRA1;CLEC4C;NLRC4;SCRIB;REG3G;LAIR2;LILRA4;BTNL9;COL20A1;SLAMF6;MARCO;DMBT1;FPR1;FGA;TLR2;HLA-DQA2;CD84;PGLYRP3;MUC16;VAMP3;BTNL8;MICB;CD33;NLRP10;PRKCB;CLC;A2M;CMKLR1;VSIG4;CLEC12B;FPR3;FCGR2B;PHB;BTLA;FCGR2A;KRT1;HLA-DPA1;GPR32;CD300LB;MS4A2;HMGB1;SIGLEC9;AIM2;HLA-DPB1;FCN1;FCGR3A;CD200R1;PRKCQ;FGG;ITK;CD300E;OTOP1;IL21;CD3G;IL18RAP;PLCG2;CD1A;S100A9;LILRB1;SIGLEC7;LAIR1;HLA…	transcription regulatory region sequence-specific DNA binding	143	0.000133144	SMYD3;UBTF;SIX4;KLF3;ETV3;SMARCD2;LRRFIP1;SOX9;PATZ1;HOXC10;SOX4;BATF3;NFYB;GZF1;FOXO3;BHLHE40;H3F3A;KLF13;ETV6;NONO;ZNF658;MXD1;RBBP4;SATB1;DDIT3;PRDM5;E2F3;CCAR1;ZNF639;GMEB1;HOXC6;SSBP4;CREM;ZNF131;THRB;TXK;PPARA;SMAD2;ETV4;THRA;SMAD1;NRF1;PPARG;PURB;KLF7;GMEB2;KLF10;ZBTB5;DMRT1;NR1I2;MLX;TAL2;HOXB2;BACH2;UHRF1;NCOA2;NME1;JUN;NKRF;TOX3;SNAI2;PCGF5;SMAD5;HOXC11;ZNF239;NFE2L3;IER2;SAFB;ZC3H8;PRD…	Diazepam	9	1.01643e-05	GABRE;CYP2C8;CYP2B6;GABRB1;GABRA6;GABRA4;GABRP;CYP2C9;CYP2C19
regulation of immune response to tumor cell	1	0.0303023	CD226	phosphorylase kinase complex	4	0.000529301	PHKA2;PHKA1;PHKG2;PHKB	regulation of photoreceptor cell differentiation	1	0.0267543	SOX9	Asthma	15	1.00073e-07	PRG2;HLA-DQA2;HLA-DOB;HLA-DPA1;MS4A2;HLA-DPB1;CCL11;HLA-DQA1;RNASE3;HLA-DMB;FCER1A;CD40LG;HLA-DOA;IL3;HLA-DRA	nucleoside triphosphate metabolic process	65	0.000141884	ADK;COX7C;ALDOA;UCKL1;CTPS2;NME4;FIGNL1;NME9;NDUFAF1;ATP1B1;SDHC;NDUFS4;P2RX7;NUDT16;ATP6V1B2;ENO3;MFN1;PGK1;PPARA;UCK1;ENO2;AK7;GAPDH;ZBTB20;SLC25A12;NME1;NDUFB2;NDUFS8;EIF6;LDHC;NDUFS2;ENO4;CMPK2;BAD;GALK1;PRKAG2;AK4;AK3;SLC25A13;NDUFB4;PPIF;PGAM1;CYC1;GUK1;ADPGK;NDUFB7;HDAC4;NDUFA4;PFKFB1;UQCC2;SMPDL3A;COX15;UQCRC1;FBP1;DTYMK;UQCRFS1;PID1;ENO1;UQCRC2;SUCLG1;NDUFV3;DNAJC30;INSR;ECD;NDUFA6	Phenytoin	7	1.10832e-05	CYP2C8;CYP2B6;CYP11B1;SCN5A;CYP2C9;UGT1A1;CYP2C19
regulation of cell proliferation involved in kidney development	1	0.0303023	SERPINB7	phosphorylase kinase activity	4	0.000529301	PHKA2;PHKA1;PHKG2;PHKB	regulation of serine-type endopeptidase activity	1	0.0267543	ANXA8L1	neurotransmitter receptor activity	32	1.65227e-07	CHRNB2;GRIK5;GRIN2B;OR10H2;HTR2A;HRH2;GABRR2;GRIN2A;OR6T1;OR10H5;OR56A5;GLRA1;GABRB1;GABRE;OPRM1;CHRM3;HTR1E;GABRB3;GLRA3;CHRNA4;GRID1;GABBR2;GRIK3;GRIN3B;HTR5A;GABRA3;OR10J5;HRH1;OR10H3;HTR4;OR10H1;HTR3E	cellular nitrogen compound catabolic process	114	0.000142219	HINT1;ADAL;TIRAP;RPL13;ALDOA;NT5M;RPL10;ALKBH5;HNRNPA0;ANGEL2;NEIL2;CDADC1;IGF2BP2;CNOT10;UPF3A;MEX3D;RPL28;FMR1;TNRC6A;DROSHA;RNASEH1;P2RX7;NUDT16;AADAT;EXOSC6;DCPS;MAGOH;CNOT6;ENO3;HNRNPD;ENTPD4;CASP3;CYP2D6;NUDT11;RPLP0;RNASET2;PGK1;PPARA;NUP214;PNP;NT5C1B-RDH14;CIRBP;ENO2;APAF1;RPL8;GAPDH;YWHAZ;CARHSP1;DIS3L;XPO1;ZC3H14;ZBTB20;RNPS1;PDE8B;SLC25A12;DNASE1L2;GEN1;AXIN2;KHSRP;RPS7;EIF6;SMG9;RNH1…	Sevoflurane	8	1.62841e-05	GABRE;KCNA1;CYP2B6;GABRB1;GLRA1;GABRA6;GABRA4;GABRP
JAK-STAT cascade involved in growth hormone signaling pathway	1	0.0303023	JAK2	protein-arginine deiminase activity	4	0.000529301	PADI1;PADI2;PADI3;PADI4	regulation of serine-type peptidase activity	1	0.0267543	ANXA8L1	inorganic cation transmembrane transporter activity	101	4.2376e-07	KCNE1;CHRNB2;COX8C;SCN8A;GRIK5;SLC6A16;GRIN2B;SLC10A2;KCNQ2;KCNA1;KCNQ3;SLC5A2;SCN11A;SLC8A3;CACNG3;KCNB2;GRIN2A;KCNH1;SCN5A;KCNK18;TRPC4;ATP2B2;COX7B2;CACNG2;KCNT1;SCN10A;FAM155A;SLC4A8;NALCN;OPRM1;KCNK9;SLC24A1;RYR1;OTOP1;CACNA2D4;TMEM63C;KCNT2;CHRNA4;TRPC7;SLC6A1;TRPC3;SLC24A5;KCNG2;ATP13A5;CACNA1A;ATP6V1H;KCNN1;CNGA2;PKD2L1;RYR3;SLC11A2;TRPM2;SLC1A6;GRIK3;GRIN3B;COX6C;KCNE2;HCN4;SLC6A7;KCNK2;…	organelle envelope	201	0.000145923	MRPL28;COX7C;FKBP8;MRPL44;BCHE;MRPL46;LMNB2;TIMMDC1;VRK2;MRPS18A;VDAC3;COX11;MRPS10;SLC25A44;GPD2;CHDH;NME4;ARMCX2;MCUR1;TUBB;KPNA4;STARD13;MRPL17;FBXL4;NDUFAF1;SLC30A1;IMMT;P2RX2;SLC25A1;FOXO3;STARD7;ARMCX6;MRPS25;CISD1;PLCB1;SDHC;NDUFS4;MFN2;BNIP1;CHMP7;P2RX7;BRI3BP;SLC29A2;NUPL2;TMEM177;TTC19;SEH1L;ANKZF1;BNIP2;VDAC2;BIK;EPHA4;MFN1;SFXN4;AKIRIN1;DCTN5;RTCB;CERS2;XPO4;TMEM14C;TNPO2;TMEM126A;NUP…	Secobarbital	7	1.63931e-05	GRIN2B;GRIN2A;CYP2C8;GABRA6;GABRA4;GRIA2;CYP2C9
ectodermal placode development	1	0.0303023	TBX3	ubiquitin-like protein transferase activity	65	0.000542711	RNF31;RNF139;CDC34;MED31;FBXW5;ZNF598;RNF208;RANBP2;TRIM3;BIRC6;MKRN1;SYVN1;RCHY1;ARIH2;XIAP;RNF4;UBL4A;BTRC;UBE2E1;FBXO45;RNF144B;ASB2;RBCK1;RNF182;WSB1;HLTF;TRIM21;CUL2;ZNF451;RNF167;FBXO11;SIAH3;MED21;RNF181;RNF126;NEDD4;UBE2S;RNF8;WDSUB1;FBXO25;RNF168;SUMO2;UBE2L3;RNF19B;ANAPC4;RNF6;NSMCE1;ERCC8;VHL;UBE2C;CBLC;RNF170;FBXO24;TRIP12;NHLRC1;SUMO1;UBE2K;PRPF19;RNF114;CUL4B;RNF150;ARIH1;RNF103;RNF…	regulation of male gonad development	1	0.0267543	SOX9	collagen-containing extracellular matrix	68	1.39559e-06	TPSB2;NAV2;APLP1;USH2A;PRG2;ADAMTS10;COL20A1;MXRA5;IL7;ADIPOQ;FGA;COL4A1;MFAP5;COL6A3;CLC;A2M;PRG3;SERPINA1;COL4A2;KRT1;ITIH2;DEFA1;FCN1;TPSAB1;MMP28;COL5A1;FGG;ADAMTS2;ACAN;ITIH1;DCN;COL6A5;S100A9;AHSG;EDIL3;S100A8;HAPLN1;CMA1;TINAG;HRG;FGB;PLG;CDH13;PRG4;THBS2;CCDC80;CTSC;APCS;HSP90B1;PTPRZ1;COL27A1;CRELD1;NCAM1;FGF10;COL8A1;HMCN1;KNG1;PRTN3;CALR;COL1A2;S100A7;TNR;COL5A3;COL21A1;COL6A6;TGFB1;FR…	envelope	201	0.000145923	MRPL28;COX7C;FKBP8;MRPL44;BCHE;MRPL46;LMNB2;TIMMDC1;VRK2;MRPS18A;VDAC3;COX11;MRPS10;SLC25A44;GPD2;CHDH;NME4;ARMCX2;MCUR1;TUBB;KPNA4;STARD13;MRPL17;FBXL4;NDUFAF1;SLC30A1;IMMT;P2RX2;SLC25A1;FOXO3;STARD7;ARMCX6;MRPS25;CISD1;PLCB1;SDHC;NDUFS4;MFN2;BNIP1;CHMP7;P2RX7;BRI3BP;SLC29A2;NUPL2;TMEM177;TTC19;SEH1L;ANKZF1;BNIP2;VDAC2;BIK;EPHA4;MFN1;SFXN4;AKIRIN1;DCTN5;RTCB;CERS2;XPO4;TMEM14C;TNPO2;TMEM126A;NUP…	transporter complex	33	1.65642e-05	CATSPER2;TRPC5;RYR3;GABRE;GRIN2B;DPP6;KCNB2;GRIN2A;KCNA1;VWC2;SCN4A;GRIK3;DPP10;LRRC8E;KCNQ3;GABRB1;CACNG2;GLRA1;KCNA4;KCNIP4;CNGB3;KCNV1;GABRA6;CACNG3;GABRA4;GRIK5;GRIA2;GABRP;SCN5A;SCN11A;KCNQ2;CACNA1A;CATSPER1
negative regulation of JUN kinase activity	1	0.0303023	SERPINB3	protein localization to membrane	87	0.000542732	SRP14;SCRIB;RPL21;RPL10;RPLP2;RPL37A;YWHAB;RER1;SRP9;RPS7;PEX26;RPL30;LYPLA1;RPS15A;RPS3A;ARL13B;PTPN9;UBL4A;HRAS;RPL35;RPS8;RPL8;RPLP1;RPS14;PEX19;YWHAZ;RPL6;RPL37;BAD;YWHAG;RPL31;RPS11;ZFAND2B;ARF6;HPS6;RAB26;KCNE1;RPS3;GGA3;RPS15;HGS;ICMT;PIP5K1A;CLTC;ZDHHC14;BAG6;CNST;DENND4C;APPL1;SEC23A;RDX;RPL13;GRIPAP1;RPSA;PICK1;MOAP1;YWHAH;ETV5;BBS2;RELN;GRIK5;VAMP3;F11R;ATG4C;RAP2A;FERMT2;RPLP0;RPS2;AN…	interneuron migration from the subpallium to the cortex	1	0.0267543	ARX	regulation of immune system process	199	1.773e-06	RNF31;CHRNB2;TARM1;CLEC4D;APLF;LILRA1;CLEC4C;CLECL1;PDGFD;NLRC4;SCRIB;REG3G;LAIR2;LILRA4;CCL4L1;BTNL9;COL20A1;SLAMF6;IL17A;MARCO;DMBT1;IL7;FPR1;CCL3;ADIPOQ;FGA;TLR2;HLA-DQA2;CD84;PGLYRP3;MUC16;VAMP3;BTNL8;MICB;CD33;NLRP10;PRKCB;CLC;A2M;HLA-DOB;CMKLR1;VSIG4;CLEC12B;FPR3;FCGR2B;PHB;BTLA;FCGR2A;KRT1;HLA-DPA1;GPR32;CD300LB;MS4A2;HMGB1;SIGLEC9;AIM2;HLA-DPB1;FCN1;FCGR3A;CD200R1;MMP28;PRKCQ;CCL7;TSLP;FG…	phosphotransferase activity, alcohol group as acceptor	143	0.00015018	ADK;ERCC2;EIF2AK2;N4BP2;CDC42BPA;MAP3K8;VRK2;NEK9;CDK17;BUB1;WNK4;TTK;WEE1;MAST2;PHKA1;STK16;CHEK2;MMD;PHKA2;STKLD1;ERLIN2;ETNK1;EPHB4;STK35;PRKD1;HSP90AA1;SQSTM1;PAPSS2;GALK2;DDR2;ULK2;FES;AURKA;ACVR1;TGFBR2;EPHA4;SIK2;POMK;TXK;AAK1;CCNH;ERCC3;SRPK3;CDK18;EFNA3;PDK1;ITPKB;CDK5R1;PIM1;STK24;PTK6;DMPK;GSK3B;LTBP1;SCYL1;PDGFRL;EPHA7;MARK1;RIOK1;NRBP2;NOL9;CRIM1;RPS6KC1;GTF2H1;MET;RPS6KA6;FGF20;IL5;…	Diclofenac	8	2.19067e-05	CYP2C8;SCN4A;CYP2B6;KCNQ3;CYP2C9;KCNQ2;UGT1A1;CYP2C19
oxygen carrier activity	1	0.0303023	HBZ	positive regulation of cell cycle phase transition	20	0.000565968	EZH2;MEPCE;STOX1;CDK1;APEX1;TMOD3;DDRGK1;RDX;ZNF16;ANAPC4;CCND1;KMT2E;FBXO5;UBE2C;DLGAP5;RAD51C;NPM1;CUL4B;PLCB1;LSM11	actin filament reorganization	1	0.0267543	NEDD9	Staphylococcus aureus infection	19	1.82699e-06	FPR1;HLA-DQA2;HLA-DOB;FPR3;FCGR2B;FCGR2A;HLA-DPA1;HLA-DPB1;FCGR3A;FGG;FCAR;HLA-DQA1;C4B;PLG;HLA-DMB;HLA-DOA;HLA-DRA;C5AR1;MASP1	ribonucleoprotein complex	151	0.000151176	MRPL28;EIF2AK2;MRPL44;MRPL46;RPL13;NSUN2;MRPS18A;SECISBP2L;GAR1;MRPS10;RPL10;RBM41;HNRNPA0;TUBB;MAK16;MRPL17;PRPF40B;POLI;SRP9;EIF1;ADAR;USP39;MRPS25;RPL28;FMR1;TNRC6A;NCL;SQSTM1;ATXN2L;SNRNP40;IMPACT;DRG1;DCPS;MAGOH;GHR;HNRNPD;RPLP0;EIF3A;RBM14-RBM4;LARP4B;RPF1;RPS27L;DDX1;CIRBP;SMNDC1;NCK1;SURF6;TRIM21;TIAL1;RPL8;GAPDH;MBNL1;HTATSF1;EIF3M;CARHSP1;NAA38;HELZ;XPO1;SF3B3;SF3B2;IK;RPP21;ZC3H14;TMA1…	Isoflurane	8	2.19067e-05	GABRE;KCNA1;CYP2B6;GABRB1;GLRA1;GABRA6;GABRA4;GABRP
inositol 1,4,5 trisphosphate binding	1	0.0303023	TRPC5	microtubule cytoskeleton	155	0.000603114	IK;CENPU;PCGF5;BBS7;MAPK1;HNRNPU;RANBP2;GSK3B;RPS7;VPS37A;DYNLRB2;BIRC6;ACTR1B;KATNAL1;TTK;TBC1D31;NDN;CCP110;TRIM55;RBM39;JTB;TTC19;CEP350;NUDT21;GEN1;NSUN2;ERCC2;ZNF207;TUBB;DCTN5;SRPRB;ATAT1;SLC25A5;TMEM67;JADE1;FOPNL;CDK16;TOP2A;NEK4;CDK2AP2;TPPP3;CCT4;RPS3;PCIF1;KIF5C;B9D2;MAD2L1;DPYSL2;PSEN2;STOX1;KIF18A;CBX1;CDC16;KLHL12;KIF24;CENPJ;WDR47;CDK1;SDCCAG8;PRC1;CCDC92;APEX1;USH2A;CLTC;TTC26;CCT…	otic vesicle morphogenesis	1	0.0267543	SOX9	carbohydrate binding	53	1.89957e-06	CLEC4D;REG1B;CLEC4C;GALNT8;CLECL1;REG3G;PRG2;COL20A1;CLEC17A;SIGLEC12;SIGLEC8;CD33;CLC;PRG3;KLRG1;CLEC12B;KRT1;LGALS14;CLEC3A;SIGLEC9;FCN1;SIGLEC10;OS9;ACAN;CHODL;ALDOB;SIGLEC7;GALNT9;KLRB1;GNPNAT1;FCN2;CLEC1A;TINAG;CLEC4M;OLR1;CLEC4E;SIGLEC14;CNTN1;CLEC1B;PRG4;APCS;KLRF1;CLEC9A;CALR;CLEC12A;SIGLEC5;LGALS13;NPTX2;CLEC7A;CLEC2B;SIGLEC11;DBH;COLEC10	Pyrimidine metabolism	28	0.000153649	NT5M;UCKL1;CTPS2;NME4;DCTD;ENTPD4;NT5C1B;NME1-NME2;PNP;UCK1;NT5C1B-RDH14;TK2;POLR2L;RRM1;NME1;POLR3C;POLR2C;POLE2;POLD2;CMPK2;TK1;CDA;UPP1;POLR2I;POLA2;DTYMK;POLR3H;POLR2D	Apalutamide	8	2.19067e-05	GABRE;CYP2C8;GABRB1;GABRA6;GABRA4;GABRP;CYP2C9;CYP2C19
Dexfosfoserine	1	0.0303023	SERPINB3	nuclear outer membrane-endoplasmic reticulum membrane network	144	0.00062762	RNF139;ALG12;PDCD6;COPB1;VRK2;DHRS4;FKBP1A;ALG1;RANBP2;SRP9;SEC24D;SYVN1;EMC9;TMEM33;RPN1;FKBP8;JKAMP;SPTLC2;TRDN;HTRA2;TMEM106C;SSR4;TMED4;DNAJB9;SUCO;PCYT1A;HLA-F;IER3IP1;AGPAT4;MOGS;ARMC10;EVA1A;SRPRB;ATP10A;TMED3;ACER1;RTCB;ABCB9;TMEM67;HSP90B1;ORMDL1;ELOVL4;ATXN3;SEC22C;ART1;SEC11C;ELOVL1;ZFAND2B;GOSR2;COPA;YIF1A;RAB2A;FMO4;ERGIC3;ALG9;SFTPD;DGAT1;PSEN2;ANO5;CTAGE1;AWAT1;PGAP1;ICMT;CNIH1;CDK…	fructose 6-phosphate metabolic process	1	0.0267543	FBP1	Temazepam	12	2.17593e-06	CYP2C8;CYP2B6;CYP2C19;GABRR2;GABRB1;GABRE;GABRB3;GABRP;GABRQ;CYP3A4;CYP2C9;GABRA3	nucleotide biosynthetic process	71	0.000154004	ADK;ATIC;PRPSAP2;ALDOA;UCKL1;CTPS2;NME4;HDDC2;CDADC1;SLC35B3;NME9;SLC25A1;APRT;DCTD;P2RX7;PAPSS2;ENO3;DLAT;ADCY3;PGK1;PPARA;PNP;MTHFD2L;UCK1;ENO2;PDK1;KARS;TK2;AK7;GAPDH;PPCS;RRM1;RNLS;PRPS1;ZBTB20;SLC25A12;NME1;EIF6;LDHC;CDS2;ACAT1;SLC26A2;ENO4;CMPK2;GALK1;PRKAG2;NAPRT;AK4;AK3;SLC25A13;PGAM1;TK1;CYC1;GUK1;UPP1;ADPGK;HDAC4;PRPSAP1;PFKFB1;SHMT1;FBP1;DTYMK;SCD5;PID1;PARP16;ENO1;ADSS;ELOVL2;DNAJC30;…	Etomidate	7	2.36412e-05	GABRE;CYP11B1;GABRB1;CYP11B2;GABRA6;GABRA4;GABRP
Curcumin	1	0.0303023	GSTA1	organelle subcompartment	212	0.000630748	RNF139;ALG12;PDCD6;COPB1;VRK2;DHRS4;ZDHHC17;SLC35A2;YIPF1;ARF1;BET1L;FKBP1A;ALG1;RER1;SRP9;KPNB1;BIRC6;SEC24D;SYVN1;EMC9;TMEM33;C1GALT1C1;RPN1;FKBP8;FAM20B;TRAPPC4;JKAMP;SPTLC2;TRDN;HTRA2;TMEM106C;SSR4;ARFIP2;TMED4;HRAS;DNAJB9;SUCO;PCYT1A;HLA-F;QPCTL;IER3IP1;AGPAT4;C6orf89;MOGS;VPS53;ARMC10;EVA1A;SRPRB;ATP10A;TMED3;ACER1;RTCB;ABCB9;TMEM67;NAGPA;HSP90B1;FUT10;RFNG;ORMDL1;ELOVL4;ATXN3;SEC22C;ZDHHC1…	regulation of alkaline phosphatase activity	1	0.0267543	ITGA2	inorganic molecular entity transmembrane transporter activity	128	2.54645e-06	KCNE1;CHRNB2;COX8C;SCN8A;GRIK5;SLC6A16;GRIN2B;SLC10A2;KCNQ2;KCNA1;KCNQ3;SLC5A2;SCN11A;SLC8A3;ANO5;CACNG3;SLC35A1;GABRR2;BEST2;KCNB2;GRIN2A;KCNH1;SCN5A;KCNK18;TRPC4;ATP2B2;COX7B2;GLRA1;CACNG2;GABRB1;KCNT1;SCN10A;FAM155A;SLC4A8;NALCN;GABRE;ANO2;OPRM1;KCNK9;SLC35A5;SLC24A1;RYR1;NMUR2;OTOP1;GABRB3;GABRP;CACNA2D4;TMEM63C;GLRA3;KCNT2;CHRNA4;TRPC7;GRID1;SLC6A1;TRPC3;SLC24A5;KCNG2;ATP13A5;CACNA1A;ATP6V1H…	mitotic nuclear division	61	0.000160219	EPS8;TOM1L1;MAP10;BUB1;TTK;ZNF207;CHEK2;NAA50;CHMP7;SEH1L;AURKA;PHF23;STAG2;PHIP;CHAMP1;NDE1;ZWINT;CUL9;TUBGCP3;KIF20B;EPGN;XRCC3;CHTF8;DMRT1;IK;KIF2A;NPM2;PTTG1;GEN1;ANAPC4;CAV2;ATRX;DSCC1;SIRT7;PPP2R1A;FGF8;EREG;LRP5;KPNB1;CDKN1C;HNRNPU;NIPBL;RAD21;EDN1;MKI67;TGFA;TTN;CHMP4B;PKMYT1;FBXW5;AURKAIP1;CDC26;PDS5B;UBE2C;PDCD6IP;CCNE1;BTC;KATNB1;CHMP5;INSR;ANAPC5	Eszopiclone	7	2.36412e-05	GABRE;CYP2C8;GABRB1;GABRA6;GABRA4;GABRP;CYP2C9
epithelial cell differentiation	5	0.0306459	IFT74;ARX;TBX3;GSTA1;KRTAP6-1	RNA localization	40	0.000632052	RBM15B;SRSF11;HNRNPU;U2AF2;RANBP2;SRSF3;MAGOH;UPF2;PRPF6;IWS1;THOC3;CCT4;KIF5C;ENY2;RPS15;KHSRP;ARC;ATXN2;CCT6A;NUP88;CPSF3;NUTF2;HNRNPA3;RPSA;NOP10;POM121;CCT7;LRPPRC;SEC13;SMG5;ZNHIT6;SHQ1;XPO1;SUPT6H;NPM1;NUP155;BCCIP;NUP133;SFPQ;NUP98	cerebral cortex tangential migration	1	0.0267543	ARX	membrane protein complex	168	3.0733e-06	RNF31;KCNE1;GJA10;CHRNB2;COX8C;COPB1;SCN8A;GRIK5;NAPG;SCRIB;GRIN2B;LILRA4;KCNQ2;GNG2;KCNA1;KCNQ3;SCN11A;TLR2;HLA-DQA2;CACNG3;APBB1IP;GABRR2;VAMP3;BEST2;KCNB2;DPP10;GRIN2A;KCNH1;SCN5A;TRPC4;HLA-DOB;NOX3;SYVN1;SUN3;COX7B2;GLRA1;CACNG2;GABRB1;HLA-DPA1;SCN10A;MS4A2;HMGB1;NDUFV1;GABRE;BMP2;CDH8;HLA-DPB1;ANO2;SGCZ;AP3B2;RYR1;AP3D1;GABRB3;GABRP;CD3G;CACNA2D4;IL18RAP;OS9;ITGA7;STX5;GLRA3;LIN7C;HTRA2;GJB4…	deoxyribonucleoside monophosphate metabolic process	8	0.000169626	NT5M;HDDC2;CDADC1;DCTD;TK2;TK1;GUK1;SHMT1	inorganic cation transmembrane transporter activity	49	3.08508e-05	CATSPER2;TRPC5;SLC5A2;KCNK9;RYR3;GRIN2B;SLC6A2;PIEZO2;OTOP1;KCNB2;GRIN2A;SLC1A6;KCNA1;ASIC2;SCN4A;GRIK3;KCNT2;OPRM1;TMEM38A;ASIC5;KCNK18;KCNQ3;CNGA2;SLC2A9;CACNG2;COX7B2;KCNA4;P2RX3;KCNIP4;JPH3;KCNT1;CNGB3;KCNV1;ATP2B2;CACNG3;GRIK5;COX8C;GRIA2;NALCN;SCN5A;TMEM63C;SCN11A;SLC6A9;SLC5A7;KCNQ2;CACNA1A;ATP13A5;SLC2A8;CATSPER1
detoxification	2	0.0316949	GSTA1;HBZ	proteolysis	220	0.000645187	SPATA2;PEBP1;RNF139;CDC34;TPSB2;PDCD6;BAG5;FBXW5;OTUD3;GBA;BBS7;AGA;CTSV;PSMF1;USP50;GSK3B;TRIM3;TPSAB1;RPS7;VPS37A;BIRC6;SYVN1;PSMD8;PCYOX1;PSMD6;F12;TMPRSS9;RCHY1;GPS1;ARIH2;PRTN3;XIAP;RNF4;TRIB1;ANTXR1;AURKAIP1;JKAMP;ST20;CCP110;ACTR5;HTRA2;HSPD1;TMPRSS11B;DNAJB9;PIDD1;BTRC;PSME2;PSMD9;UBE2E1;FBXO45;RNF144B;RBCK1;STAMBP;PSMA7;JOSD1;CUZD1;TMEM67;CLSPN;BAD;FOXRED2;HSP90B1;TASP1;ATXN3;COPS6;TRIM2…	olfactory bulb interneuron development	1	0.0267543	ARX	metal ion transport	129	3.27802e-06	KCNE1;CHRNB2;SCN8A;FGF2;GRIN2B;SLC10A2;KCNQ2;CCL4L1;KCNA1;KCNQ3;HTR2A;GRM6;CCL3;SLC5A2;SCN11A;SLC8A3;CD84;RCVRN;CACNG3;FTL;KCNB2;DPP10;GRIN2A;KCNH1;SCN5A;KCNK18;PRKCB;PMPCA;TRPC4;ATP2B2;ADCYAP1R1;CACNG2;PHB;VIP;KCNT1;FFAR1;SCN10A;FAM155A;SLC4A8;NALCN;TRDN;OPRM1;KCNK9;SLC24A1;RYR1;NMUR2;ANK2;CCL8;CACNA2D4;PLCG2;KCNT2;FTMT;CHRNA4;TRPC7;LILRB1;TRPC3;SLC24A5;HEPH;KCNG2;BDKRB1;CACNA1A;ATP6V1H;CRH;FCRL…	regulation of mitotic cell cycle phase transition	73	0.000187748	JADE1;ERCC2;SDCCAG8;BUB1;TUBB;TTK;SOX4;CNOT10;ZNF207;WEE1;CHEK2;USP47;PLCB1;HSP90AA1;AURKA;MEPCE;CNOT6;NDE1;ERCC3;DYNLL1;NAE1;RPS27L;GTSE1;CLSPN;YWHAG;MDM2;XRCC3;IK;NPM2;DDX3X;GEN1;ANAPC4;PAFAH1B1;PKD2;PPP2R1A;BAX;UBE2E1;CDKN1A;SIN3A;CEP152;MSH6;CDKN1C;MDM4;RINT1;RAD21;FGFR1OP;PIDD1;TUBB4B;BRD4;PRKACA;CASP2;CDC26;E2F8;UBE2C;TAOK3;RAD17;MYO16;CCNE1;DACT1;BTRC;NEK11;PSME1;ODF2;PCNA;CENPJ;ECD;CDK2;A…	cell recognition	19	3.18157e-05	CATSPER2;UBAP2L;HSPA1L;TNN;FUT3;PCSK4;PECAM1;ROBO2;CLEC4M;TEX101;CNTNAP3;EPHB1;ADAM21;CD226;CRTAM;PCDH12;PRF1;FOLR3;CATSPER1
female sex differentiation	2	0.0316949	BAK1;TBX3	extrinsic component of synaptic membrane	6	0.000656533	SCRIB;DGKI;CTNNA2;PHB;CRKL;TIAM1	fascia adherens	1	0.0267543	ACTN1	Halothane	15	3.73622e-06	CYP2B6;GNG2;GRIN2A;GLRA1;GABRB1;GABRE;KCNK9;GABRB3;GABRP;GABRQ;GRIN3B;CYP3A4;CYP2C9;GABRA3;RHO	regulatory region nucleic acid binding	160	0.000216187	SMYD3;UBTF;SIX4;KLF3;ETV3;PRDX5;SMARCD2;LRRFIP1;SOX9;PATZ1;HOXC10;SOX4;BATF3;NFYB;GZF1;FOXO3;BHLHE40;H3F3A;KLF13;ETV6;NONO;ZNF658;MXD1;RCOR2;RBBP4;SATB1;DDIT3;PRDM5;E2F3;CCAR1;DR1;ZNF639;GMEB1;HOXC6;SSBP4;CREM;ZNF131;THRB;TXK;PPARA;SMAD2;ETV4;THRA;SMAD1;TBL1XR1;NRF1;PPARG;PURB;KLF7;MBNL1;GMEB2;KLF10;ZBTB5;ATMIN;DMRT1;NR1I2;RCOR3;MLX;TAL2;HOXB2;ZBTB20;BACH2;UHRF1;NCOA2;NME1;JUN;NKRF;TOX3;SNAI2;PCG…	CCR chemokine receptor binding	9	3.51244e-05	DEFB4B;CCL13;CCL27;CCL2;DEFB106A;CCL7;CCL1;CCL4L1;CCL11
glomerular mesangium development	1	0.0325957	SERPINB7	rRNA metabolic process	41	0.000667227	BOP1;RPS7;NCL;WDR55;HEATR1;GTF3A;BTRC;RPL35;RPS8;RPS14;CD3EAP;TBL3;IMP4;ABT1;EMG1;KRR1;RPS15;URB1;MRPL1;PWP1;FTSJ3;GAR1;RPSA;DDX17;H2AFY2;NOP10;NOP56;RPF2;SLFN14;DDX11;ZNHIT6;SBDS;SHQ1;RPS2;NGDN;EXOSC7;WDR74;TRMT61B;RPL10A;UTP3;RPS16	cardiolipin binding	1	0.0267543	UCP1	regulation of membrane potential	73	4.25155e-06	KCNE1;CHRNB2;MYH14;WNT7A;SCN8A;GRIK5;GRIN2B;KCNA1;KCNQ3;SCN11A;SLC8A3;GABRR2;BEST2;GRIN2A;KCNH1;SCN5A;GLRA1;CACNG2;GABRB1;KCNT1;TMEM108;SCN10A;NALCN;GABRE;TRDN;OPRM1;ANK2;GABRB3;GABRP;GLRA3;DCN;KCNT2;SOD1;CHRNA4;DGKI;CACNA1A;NTRK3;SLC1A6;FGF14;GRIK3;GABRQ;KCNE2;HCN4;KCNK2;NPS;TCL1A;GABRA3;GBA;SCN4A;GSK3B;GJD2;CACNA1E;CNR1;CACNA1B;CACNA1I;KCND3;GJA5;RYR2;CACNA1H;POPDC2;HTR3E;SCN9A;P2RX3;HCN1;SHANK…	physiological muscle hypertrophy	11	0.000216613	AGT;G6PD;PPARA;PARP2;HAMP;AKAP13;EDN1;AGTR2;SORBS2;AKAP6;CAV3	Desflurane	7	4.60765e-05	GABRE;KCNA1;GABRB1;GLRA1;GABRA6;GABRA4;GABRP
regulation of glomerulus development	1	0.0325957	SERPINB7	regulation of mRNA metabolic process	45	0.000675945	RBM15B;CCNT1;HNRNPA0;TIRAP;YWHAB;HNRNPU;U2AF2;SAFB;RBM5;SRSF3;MAGOH;ANGEL2;PTBP1;RBM3;NUDT21;ZC3H14;YBX1;YWHAZ;IWS1;HNRNPC;SAMD4A;RBM11;RBFOX3;CDK9;HSPA8;APOBEC1;KHSRP;DDX5;APEX1;MAPK14;DDX17;RBM15;CNOT1;XPO1;SUPT6H;TRA2A;YTHDF2;EXOSC7;PUM2;NPM1;SREK1;PRPF19;METTL14;RBM25;NUP98	pre-mRNA intronic binding	1	0.0267543	SOX9	Nicotine addiction	15	5.40578e-06	CHRNB2;GRIN2B;GABRR2;GRIN2A;GABRB1;GABRE;GABRB3;GABRP;CHRNA4;CACNA1A;SLC17A6;GABRQ;GRIN3B;GABRA3;CACNA1B	physiological cardiac muscle hypertrophy	11	0.000216613	AGT;G6PD;PPARA;PARP2;HAMP;AKAP13;EDN1;AGTR2;SORBS2;AKAP6;CAV3	Stiripentol	7	4.60765e-05	GABRE;GABRB1;GABRA6;GABRA4;GABRP;CYP2C9;CYP2C19
nose development	1	0.0325957	SMCHD1	protein ubiquitination	104	0.000709777	RNF31;RNF139;CDC34;PDCD6;BAG5;MED31;FBXW5;ZNF598;PCGF5;RNF208;FKBP1A;PEX10;U2AF2;TRIM3;RPS7;BIRC6;MKRN1;SYVN1;RCHY1;ASB15;ARIH2;ARRDC4;XIAP;RNF4;BTRC;UBE2E1;UVSSA;FBXO45;RNF144B;ASB2;RBCK1;RNF182;WSB1;HLTF;TRIM21;CUL2;UBA6;THOP1;RNF167;RPS3;PCGF6;PCGF1;MAD2L1;FBXO11;SDE2;SIAH3;CDC16;KLHL12;CDK9;MED21;UBXN1;OS9;RNF181;RNF126;NEDD4;CDC26;UBE2S;RNF8;WDSUB1;PHF23;TRIM41;DCAF11;BTBD1;MKRN2;FBXO25;RNF1…	lysozyme activity	1	0.0267543	LYZ	Brivaracetam	10	5.46364e-06	CYP2B6;SCN8A;CYP2C19;SCN11A;SCN5A;SCN10A;CYP3A4;CYP2C9;SCN4A;SCN9A	cell growth involved in cardiac muscle cell development	11	0.000216613	AGT;G6PD;PPARA;PARP2;HAMP;AKAP13;EDN1;AGTR2;SORBS2;AKAP6;CAV3	inorganic molecular entity transmembrane transporter activity	62	5.29853e-05	SLC35A5;CATSPER2;TRPC5;SLC5A2;KCNK9;RYR3;GABRE;GRIN2B;SLC6A2;PIEZO2;OTOP1;KCNB2;GRIN2A;SLC26A5;SLC1A6;KCNA1;ASIC2;SCN4A;GRIK3;KCNT2;OPRM1;LRRC8E;TMEM38A;ASIC5;KCNK18;KCNQ3;CNGA2;GABRB1;SLC2A9;CLCN6;CACNG2;COX7B2;GLRA1;KCNA4;P2RX3;KCNIP4;JPH3;KCNT1;CNGB3;KCNV1;GABRA6;ATP2B2;CACNG3;GABRA4;CLCN7;SLC17A6;GRIK5;COX8C;NMUR2;GRIA2;GABRP;NALCN;SCN5A;TMEM63C;SCN11A;SLC6A9;SLC5A7;KCNQ2;CACNA1A;ATP13A5;SLC2…
skeletal muscle satellite cell proliferation	1	0.0325957	JAK2	Huntington disease	35	0.000727124	UQCRFS1;NRF1;SDHC;CYC1;UQCR11;NDUFS6;NDUFA4;SLC25A5;UQCRH;NDUFA6;SOD1;POLR2J;GPX1;APAF1;POLR2I;CLTC;HAP1;NDUFV2;NDUFB9;UQCRC2;NDUFS7;DNAH11;DNAH12;UQCRC1;COX8C;NDUFS8;NDUFB6;NDUFAB1;NDUFV1;PLCB1;POLR2L;COX6C;IFT57;CREB3L4;DNAH3	cyclic nucleotide-dependent protein kinase activity	1	0.0267543	AKAP13	keratinization	45	5.8662e-06	LOR;KRT6C;TCHH;LCE3A;LCE1A;KRT84;LCE2D;KRT1;KRT6A;KRTAP11-1;KRT76;SPRR4;LCE6A;KRT75;LCE2C;LCE2B;KRT74;LCE4A;SPRR3;KRTAP21-1;IVL;SPRR2D;LCE1B;SPRR2B;KRTAP5-3;KRT6B;KRT73;KRTAP19-8;SPRR1B;KRTAP10-11;SPRR2F;PPHLN1;LCE3C;SPRR2E;KRTAP5-4;SPRR2A;KRTAP10-1;KRTAP8-1;SPRR1A;KRT77;KRT71;KRTAP10-9;KRT82;KRT38;KRT79	gluconeogenesis	24	0.000220964	ALDOA;SLC35B4;GPD2;SLC25A1;ENO3;PGK1;PPARA;ENO2;GAPDH;LEPR;SLC25A12;SDS;FOXO1;SLC25A13;PGAM1;PER2;MAEA;RANBP2;PFKFB1;GCG;SOGA1;FBP1;SUPT20H;ENO1	regulation of membrane potential	37	5.39136e-05	TRPC5;GABRE;GRIN2B;PIEZO2;GRIN2A;SLC26A5;SLC1A6;KCNA1;ASIC2;SCN4A;WNT7A;GRIK3;NTRK3;KCNT2;NPAS4;OPRM1;BCO2;GRM5;KCNQ3;GABRB1;CACNG2;GLRA1;P2RX3;KCNT1;GABRA6;FGF14;GABRA4;GRIK5;GABRP;NALCN;SCN5A;SCN11A;ANK2;NPS;CACNA1A;PANK2;IGSF9B
GABAergic neuron differentiation	1	0.0325957	ARX	cell division	85	0.000759222	CCNT1;SOX5;ARF1;HNRNPU;FGF2;BIRC6;CKS2;NCOA3;CCP110;SPC25;JTB;TTC19;GNL3;TXNL4A;GKN1;BUB1;NSUN2;ERCC2;ZNF207;TUBB;YBX1;STAMBP;CUZD1;TAS1R2;TOP2A;NEK4;CDK2AP2;MCMBP;IGF2;ARF6;RPS3;MAD2L1;STOX1;SDE2;CDC16;CENPJ;CDK1;PRC1;BORA;CLTC;WEE1;RASA1;CCDC124;CHEK2;ANLN;CHMP2A;CDC26;UBE2S;RNF8;ARL8B;CCNK;CENPT;RGS14;RHOC;ZNF16;CDC123;ANAPC4;DCTN3;CCND1;ETV5;TACC3;CINP;KIFC1;FBXO5;UBE2C;BABAM1;CENPW;NCAPH;HAU…	response to reactive oxygen species	3	0.0269001	BAK1;FANCC;UCP1	Primidone	12	5.96345e-06	CYP2C8;CYP2B6;CYP2C19;GABRB1;GABRE;GABRB3;GABRP;CHRNA4;GABRQ;CYP3A4;CYP2C9;GABRA3	purine nucleoside diphosphate metabolic process	27	0.000223432	ALDOA;P2RX7;NUDT16;ENO3;PGK1;PPARA;ENO2;GAPDH;ZBTB20;SLC25A12;DLG2;EIF6;ENO4;BAD;GALK1;PRKAG2;AK4;AK3;PGAM1;GUK1;ADPGK;HDAC4;PFKFB1;FBP1;ENO1;INSR;ECD	Fosphenytoin	4	5.57956e-05	CYP2B6;SCN5A;CYP2C9;CYP2C19
activation of cysteine-type endopeptidase activity	1	0.0325957	BAK1	cell cycle checkpoint	38	0.000806712	IK;ATRIP;CNOT6;ORC1;TTK;NAE1;HRAS;PIDD1;PLAGL1;TIPRL;BUB1;GEN1;NSUN2;ZNF207;CLSPN;PSMG2;TOP2A;MAD2L1;CDK1;RAD17;WEE1;CHEK2;MAPK14;NABP2;PCNA;CCND1;CNOT1;EME2;CDK5RAP3;BABAM1;H2AFX;MAD2L2;CDKN1B;PRPF19;UIMC1;HMGA2;MSH2;MAD2L1BP	cell morphogenesis	7	0.027138	CFDP1;ACTN1;SS18;ARX;ARHGAP33;CUX2;NEDD9	immune response-regulating signaling pathway	82	5.99022e-06	RNF31;CLEC4D;CLEC4C;REG3G;LILRA4;BTNL9;MARCO;DMBT1;FPR1;FGA;TLR2;HLA-DQA2;PGLYRP3;MUC16;BTNL8;MICB;CD33;PRKCB;CMKLR1;CLEC12B;FPR3;FCGR2B;BTLA;FCGR2A;HLA-DPA1;GPR32;MS4A2;HMGB1;HLA-DPB1;FCN1;FCGR3A;CD200R1;PRKCQ;FGG;ITK;CD3G;PLCG2;S100A9;LILRB1;HLA-DQA1;MUC5AC;LCP2;S100A8;LSM14A;FCRL3;MUC19;TRIM15;IGLL5;DDX58;HRAS;CLEC4E;FGB;BTN2A2;IRGM;ARPC4;NR1H4;PGLYRP4;MYH2;MOG;RFTN1;HSPD1;FCER1A;BCL10;HSP90B1…	purine ribonucleoside diphosphate metabolic process	27	0.000223432	ALDOA;P2RX7;NUDT16;ENO3;PGK1;PPARA;ENO2;GAPDH;ZBTB20;SLC25A12;DLG2;EIF6;ENO4;BAD;GALK1;PRKAG2;AK4;AK3;PGAM1;GUK1;ADPGK;HDAC4;PFKFB1;FBP1;ENO1;INSR;ECD	carbohydrate binding	27	5.83291e-05	GALM;GALNT8;KLRG1;ACAN;KLRB1;CLC;CLEC1A;CLEC2A;CLEC17A;LGALS7;CLEC4M;CLEC4D;CLEC9A;CLEC18C;CLEC12B;SIGLEC7;LGALS14;SIGLEC12;SIGLEC9;LGALS4;DBH;CLEC1B;GALNTL6;KLRC1;CLECL1;KLRF1;SLC2A8
establishment or maintenance of transmembrane electrochemical gradient	1	0.0325957	BAK1	endoplasmic reticulum subcompartment	141	0.000812586	RNF139;ALG12;PDCD6;COPB1;VRK2;DHRS4;FKBP1A;ALG1;SRP9;KPNB1;SEC24D;SYVN1;EMC9;TMEM33;RPN1;FKBP8;JKAMP;SPTLC2;TRDN;HTRA2;TMEM106C;SSR4;TMED4;DNAJB9;SUCO;PCYT1A;HLA-F;IER3IP1;AGPAT4;MOGS;ARMC10;EVA1A;SRPRB;ATP10A;TMED3;ACER1;RTCB;ABCB9;TMEM67;HSP90B1;ORMDL1;ELOVL4;ATXN3;SEC22C;ART1;SEC11C;ELOVL1;ZFAND2B;GOSR2;COPA;YIF1A;RAB2A;FMO4;ERGIC3;ALG9;SFTPD;DGAT1;PSEN2;ANO5;CTAGE1;AWAT1;PGAP1;ICMT;CNIH1;CDK1…	tissue homeostasis	3	0.0275461	CTSK;SOX9;LYZ	antigen binding	18	6.08766e-06	LILRA1;SLAMF1;HLA-DPA1;HLA-DPB1;CD1A;HLA-DQA1;HLA-F;CD48;CD1C;FCN2;IGLL5;CLEC4M;PLG;CD1D;CD1B;CD1E;HLA-DRA;TGFB1	DNA replication	58	0.000225975	NT5M;TERF2;CDC34;POLI;CHEK2;RFC3;RNASEH1;NCOA6;RBBP4;STAG2;DTD1;RBM14-RBM4;CLSPN;ACD;RRM1;NPM2;GEN1;JUN;CDK2AP1;ORC5;POLG2;ATRX;TERF1;DSCC1;POLE2;TOP1;BCL6;MCMBP;POLD2;CHAF1B;BARD1;PPP2R1A;EREG;SIN3A;DBF4;MSH6;BAZ1A;DHX9;RFC4;CDK9;ATRIP;POLA2;E2F8;TIMELESS;FGFR1;SSRP1;RAD17;CCNE1;REV3L;ORC4;MCM4;DNAJC2;PCNA;CCDC88A;TSPYL2;CINP;CDK2;RBBP7	Clobazam	7	6.25454e-05	GABRE;CYP2B6;GABRB1;GABRA6;GABRA4;GABRP;CYP2C19
olfactory bulb interneuron differentiation	1	0.0325957	ARX	nuclear body	104	0.000816878	CDC34;RBM15B;SRSF11;IK;STK35;DRG1;PTK6;HNRNPU;ATXN2L;RAPH1;BRD2;U2AF2;CLK2;SRSF3;SMNDC1;IL15;RCHY1;MAGOH;DUSP11;RNF4;ANGEL2;RBM39;GNL3;SF1;PRPF6;PAPOLG;PLAGL1;LAGE3;NUDT21;SCAF11;SAP130;SNAPC5;ZC3H14;IL16;SUMO3;NCOA2;JADE1;THOC3;ZNF451;PNN;RBM11;PRPF4B;IMPAD1;CDK9;PIP5K1A;GPATCH2;APEX1;CHEK2;MAPK14;POLI;TRIM41;GAR1;CENPT;PRDM5;SUMO2;RGS14;GEMIN8;DDX17;RNF6;PCNA;NOP10;BHLHE40;FNBP4;TELO2;PTPN23;SR…	regulation of dendrite morphogenesis	2	0.0282423	ARHGAP33;CUX2	anterograde trans-synaptic signaling	108	6.09168e-06	CHRNB2;SLC22A2;WNT7A;BSN;GRIK5;SCRIB;GRIN2B;NTF3;KCNQ2;KCNA1;OR10H2;KCNQ3;HTR2A;GRM6;ADIPOQ;HRH2;SLC8A3;DCC;CACNG3;GABRR2;GRIN2A;APBA3;PRKCB;OR6T1;OR10H5;HCRTR2;OR56A5;GLRA1;SYBU;CACNG2;GABRB1;SYT11;TMEM108;GABRE;EPHB1;CDH8;OPRM1;SLC24A1;CHRM3;HTR1E;GABRB3;GABRP;ADCY8;KIF5A;GLRA3;LIN7C;CHRNA4;GRID1;NGF;SLC6A1;DGKI;CACNA1A;CRH;GABBR2;KCNN1;HRAS;SLC17A6;SYT8;SLC1A6;FGF14;GRIK3;GABRQ;NPS;ARF1;HTR5A;…	Cell cycle	32	0.000233545	BUB1;TTK;WEE1;CHEK2;E2F3;STAG2;CCNH;SMAD2;YWHAG;MDM2;YWHAZ;GSK3B;CDKN2C;PTTG1;ANAPC4;E2F5;ORC5;CDKN1A;DBF4;CDKN1C;RAD21;PKMYT1;CDC26;CCNE1;ORC4;MCM4;PCNA;CDK2;ANAPC7;ANAPC5;MYC;TP53	Carbamazepine	6	6.42178e-05	CYP2C8;CYP2B6;SCN5A;CYP2C9;UGT1A1;CYP2C19
positive regulation of nitric-oxide synthase biosynthetic process	1	0.0325957	JAK2	positive regulation of gene expression, epigenetic	15	0.000952228	KMT2B;CD3EAP;PADI2;PHF2;SLC50A1;APOBEC1;HIST1H1C;ERCC6;SMARCD1;SMARCA5;WBP2;SF3B1;POLR1C;POLR1E;POLR2L	activation of cysteine-type endopeptidase activity involved in apoptotic process	2	0.0282423	BAK1;F3	Quazepam	11	6.10032e-06	CYP2B6;CYP2C19;GABRR2;GABRB1;GABRE;GABRB3;GABRP;GABRQ;CYP3A4;CYP2C9;GABRA3	proteolysis involved in cellular protein catabolic process	126	0.000238347	BBS7;RNF217;RNF139;ATE1;UBE2A;TOM1L1;CDC34;USP18;TRIM25;FBXL4;PCYOX1;UBE2L3;RNF103;KCTD10;USP47;ERLIN2;N4BP1;USP11;DNAJB9;FMR1;SQSTM1;DDRGK1;ITCH;DDIT3;STYX;AURKA;ANKZF1;NEDD4;USP45;EPHA4;USP12;RNF187;FBXW4;CUL9;GBA;UGGT1;CHFR;ZFAND2B;KEAP1;RNF150;FBXL12;RNF4;CBLC;UBE2I;FBXO2;TBL1XR1;UBE2K;MDM2;FBXL5;GSK3B;BIRC6;NPLOC4;CTSO;FHIT;UBA6;UHRF1;UBR2;PTTG1;FBXO33;ANAPC4;UBQLN2;ZNRF3;RCHY1;RPS7;USP51;PT…	Ticlopidine	5	6.57125e-05	CYP2C8;CYP2B6;CYP2C9;MPO;CYP2C19
oxygen transport	1	0.0325957	HBZ	nucleotide-excision repair, DNA incision, 5'-to lesion	11	0.000965453	RFC5;ERCC2;PCNA;RFC4;POLD4;CUL4B;RFC3;GTF2H1;CHD1L;POLD1;ERCC5	adherens junction assembly	2	0.0288442	ACTN1;ITGA2	trans-synaptic signaling	109	6.1608e-06	CHRNB2;SLC22A2;WNT7A;BSN;GRIK5;SCRIB;GRIN2B;NTF3;KCNQ2;KCNA1;OR10H2;KCNQ3;HTR2A;GRM6;ADIPOQ;HRH2;SLC8A3;DCC;CACNG3;GABRR2;GRIN2A;APBA3;PRKCB;OR6T1;OR10H5;HCRTR2;OR56A5;GLRA1;SYBU;CACNG2;GABRB1;SYT11;TMEM108;GABRE;EPHB1;CDH8;OPRM1;SLC24A1;CHRM3;HTR1E;GABRB3;GABRP;ADCY8;KIF5A;GLRA3;LIN7C;CHRNA4;GRID1;NGF;SLC6A1;DGKI;CACNA1A;CRH;GABBR2;KCNN1;HRAS;SLC17A6;SYT8;SLC1A6;FGF14;GRIK3;GABRQ;NPS;ARF1;HTR5A;…	positive regulation of cellular protein metabolic process	258	0.000239804	SMYD3;MIF4GD;XIAP;FKBP1A;EIF2AK2;BBS7;RNF217;MAP3K8;TIRAP;AGT;FZD8;RNF139;IL1F10;TOM1L1;SOX9;TTK;SPDYA;SOX4;UPF3A;IFNK;MAGED1;UBE2L3;CHEK2;MMD;PLCB1;FMR1;EPHB4;CCNYL1;PDCD6;PRKD1;P2RX7;HSP90AA1;SQSTM1;DDRGK1;DDR2;PCOLCE;PTTG1IP;IMPACT;AURKA;PHF23;F3;NCAPG2;NPTN;ACVR1;PAXIP1;ADNP;TGFBR2;TNFRSF19;EPHA4;GHR;HNRNPD;SH3D19;CASP3;CAPRIN2;AMER1;LARP4B;GBA;RAPGEF2;RPS27L;CHFR;ANTXR1;EFNA3;CIRBP;BMP6;MID1…	Efavirenz	5	6.57125e-05	CYP2C8;CYP2B6;CYP2C9;UGT1A1;CYP2C19
dynein heavy chain binding	1	0.0325957	TRIM58	endoplasmic reticulum membrane	140	0.000968725	RNF139;ALG12;PDCD6;COPB1;VRK2;DHRS4;FKBP1A;ALG1;SRP9;SEC24D;SYVN1;EMC9;TMEM33;RPN1;FKBP8;JKAMP;SPTLC2;TRDN;HTRA2;TMEM106C;SSR4;TMED4;DNAJB9;SUCO;PCYT1A;HLA-F;IER3IP1;AGPAT4;MOGS;ARMC10;EVA1A;SRPRB;ATP10A;TMED3;ACER1;RTCB;ABCB9;TMEM67;HSP90B1;ORMDL1;ELOVL4;ATXN3;SEC22C;ART1;SEC11C;ELOVL1;ZFAND2B;GOSR2;COPA;YIF1A;RAB2A;FMO4;ERGIC3;ALG9;SFTPD;DGAT1;PSEN2;ANO5;CTAGE1;AWAT1;PGAP1;ICMT;CNIH1;CDK1;EI24;…	dendritic spine development	2	0.0294513	ARHGAP33;CUX2	defense response to Gram-negative bacterium	23	6.44549e-06	LYZL2;DMBT1;LCE3A;NLRP10;LYZL6;DEFA5;LYZL1;DEFA1;DEFA4;RNASE2;FCN2;DEFB127;RNASE3;DEFA6;DEFB128;IRGM;DEFB118;LALBA;LCE3C;RPL30;LYPD8;S100A7;CTSG	enzyme regulator activity	178	0.000261556	IGBP1;XIAP;EIF2AK2;PPP2R1B;GDI1;AGT;PRPSAP2;RALGDS;TBC1D25;PRDX5;TBC1D22B;TOM1L1;RGS1;POT1;PFN1;STARD13;BIRC5;SPDYA;ATP1B1;UBE2L3;TBC1D10B;CST6;ACAP2;PLCB1;ARHGDIB;CCNYL1;FAM13A;ARHGAP18;HSP90AA1;PPP2R3A;DNAJC24;ARHGAP20;OCRL;PCOLCE;STYX;ARHGAP21;BNIP2;ARHGAP33;SRGAP2;DNAJA2;CASP3;NSMAF;CCNH;CSTB;DYNLL1;ARFGAP2;RAPGEF2;RPS27L;CAMK2N1;IBTK;PPP2R5B;TBC1D19;ELMOD1;ARHGAP12;PPP1R36;CDK5R1;LRP6;NCK1;A…	Enflurane	7	8.35272e-05	GABRE;KCNA1;GABRB1;GLRA1;GABRA6;GABRA4;GABRP
Baricitinib	1	0.0325957	JAK2	diol biosynthetic process	7	0.00097067	DHFR;GBA;SPTLC2;ACER1;SPR;SPTLC1;SPHK2	regulated exocytosis	6	0.0296122	CDC37L1;NAPRT;ACTN1;ARSA;LYZ;CTSW	response to bacterium	96	7.64026e-06	CLEC4D;NLRC4;LYZL2;S100A12;REG3G;SLC10A2;PRG2;AICDA;IRF8;DMBT1;CCL3;ADIPOQ;FGA;TLR2;MS4A1;PGLYRP3;LCE3A;NLRP10;LYZL6;LRAT;DEFA5;CARD16;LPO;LYZL1;FCGR2B;DEFB125;SYT11;DEFB123;HMGB1;KRT6A;DEFA1;BMP2;TRDN;OPRM1;DEFA4;RNASE2;REN;PLCG2;DCN;S100A9;LILRB1;BDKRB1;TMEM229B;PNLIPRP2;S100A8;STOX2;TRIB1;FCN2;DEFB127;RNASE3;CCL2;IGLL5;DEFB115;DEFA6;CLEC4E;FGB;CASP1;DEFB128;IRGM;NR1H4;PGLYRP4;DEFB116;DEFB118;L…	peptide metabolic process	141	0.000266002	MIF4GD;MRPL28;EIF2AK2;SEC11C;MRPL44;MRPL46;ECE1;EIF2S2;RPL13;MRPS18A;SECISBP2L;RNF139;MRPS10;RPL10;GFM2;EIF4G3;DPH7;EIF2S3;MRPL17;IGF2BP2;SOX4;CNOT10;UPF3A;LARS2;MEX3D;SRP9;EIF1;FOXO3;DARS;MRPS25;RPL28;FMR1;TNRC6A;NCL;HSP90AA1;EIF2B3;DNAJC24;EIF5;G6PD;EIF4E3;IMPACT;PUS7;LSM14B;MAGOH;EPHA4;CNOT6;CARS;HNRNPD;CASP3;RPLP0;EIF3A;CAPRIN2;LARP4B;RPS27L;SORL1;DDX1;CIRBP;CPQ;KARS;NCK1;FAM129A;IMMP2L;RPL8;…	Triazolam	7	8.35272e-05	GABRE;CYP2C8;GABRB1;GABRA6;GABRA4;GABRP;CYP2C9
determination of bilateral symmetry	2	0.0341962	IFT74;TBX3	cellular response to unfolded protein	26	0.000972826	HSPA9;EIF2AK2;SYVN1;TMEM33;DNAJB9;SRPRB;DNAJB11;HSP90B1;KLHDC3;GOSR2;YIF1A;COPS5;HSPA8;DDIT3;ATF3;VAPB;CCND1;DDX11;CDK5RAP3;PTPN1;ARFGAP1;TMBIM6;ASNA1;ATF6B;CREB3L4;DERL1	fructose 1,6-bisphosphate metabolic process	1	0.0296832	FBP1	activation of immune response	88	7.87864e-06	RNF31;CLEC4D;CLEC4C;NLRC4;REG3G;LILRA4;BTNL9;COL20A1;MARCO;DMBT1;FPR1;FGA;TLR2;HLA-DQA2;PGLYRP3;MUC16;BTNL8;MICB;PRKCB;A2M;CMKLR1;VSIG4;FPR3;FCGR2B;PHB;FCGR2A;KRT1;HLA-DPA1;GPR32;HMGB1;AIM2;HLA-DPB1;FCN1;FCGR3A;PRKCQ;FGG;ITK;CD3G;PLCG2;S100A9;HLA-DQA1;MUC5AC;LCP2;S100A8;PYHIN1;LSM14A;FCN2;FCRL3;MUC19;TRIM15;IGLL5;DDX58;HRAS;CLEC4E;FGB;BTN2A2;IRGM;ARPC4;NR1H4;PGLYRP4;MYH2;MOG;RFTN1;HSPD1;BCL10;APC…	double-stranded DNA binding	162	0.00026977	SMYD3;UBTF;SIX4;MTERF2;KLF3;ETV3;SMARCD2;KDM5B;TERF2;LRRFIP1;SOX9;PATZ1;HOXC10;SOX4;BATF3;NFYB;GZF1;FOXO3;BHLHE40;H3F3A;KLF13;ETV6;NONO;ERCC5;ZNF658;MXD1;RBBP4;SATB1;DDIT3;PRDM5;E2F3;CCAR1;ZNF639;GMEB1;HOXC6;SSBP4;CREM;ZNF131;HNRNPD;THRB;TXK;PPARA;SMAD2;ETV4;THRA;SMAD1;NRF1;PPARG;PURB;KLF7;GMEB2;MTERF1;KLF10;ZBTB5;DMRT1;NR1I2;MLX;TAL2;HOXB2;BACH2;UHRF1;GEN1;NCOA2;NME1;JUN;NKRF;TOX3;SNAI2;PCGF5;SM…	Lorazepam	6	9.26862e-05	GABRE;GABRB1;GABRA6;GABRA4;GABRP;UGT2B15
ion channel binding	2	0.0341962	BAK1;ACTN1	ERAD pathway	20	0.00102739	RNF139;SYVN1;JKAMP;DNAJB9;TMEM67;FOXRED2;HSP90B1;ATXN3;USP19;UBXN1;ERLIN1;OS9;MAN1B1;BAG6;ANKZF1;SDF2L1;UBXN4;SEC13;DERL1;RNF103	prostate gland growth	1	0.0296832	SOX9	antigen processing and presentation of lipid antigen via MHC class Ib	6	7.9611e-06	AP3D1;CD1A;CD1C;CD1D;CD1B;CD1E	ribonucleoside monophosphate metabolic process	63	0.000272354	ADK;ATIC;COX7C;ALDOA;UCKL1;FIGNL1;NDUFAF1;ATP1B1;APRT;SDHC;NDUFS4;P2RX7;ATP6V1B2;ENO3;NUDT11;PGK1;PPARA;GMPR2;UCK1;ENO2;GAPDH;PRPS1;ZBTB20;SLC25A12;DLG2;NDUFB2;NDUFS8;EIF6;LDHC;NDUFS2;ENO4;BAD;GALK1;PRKAG2;AK4;AK3;SLC25A13;NDUFB4;PPIF;PGAM1;CYC1;GUK1;UPP1;ADPGK;NDUFB7;HDAC4;NDUFA4;PFKFB1;UQCC2;COX15;UQCRC1;FBP1;UQCRFS1;PID1;ENO1;ADSS;UQCRC2;NUDT10;NDUFV3;DNAJC30;INSR;ECD;NDUFA6	Meprobamate	6	9.26862e-05	GABRE;GABRB1;GABRA6;GABRA4;GABRP;CYP2C19
mesoderm development	2	0.0347054	JAK2;TBX3	extrinsic component of postsynaptic membrane	5	0.00105127	SCRIB;DGKI;CTNNA2;CRKL;TIAM1	vagina development	1	0.0296832	BAK1	antigen processing and presentation, exogenous lipid antigen via MHC class Ib	6	7.9611e-06	AP3D1;CD1A;CD1C;CD1D;CD1B;CD1E	transcription regulatory region DNA binding	159	0.000274758	SMYD3;UBTF;SIX4;KLF3;ETV3;PRDX5;SMARCD2;LRRFIP1;SOX9;PATZ1;HOXC10;SOX4;BATF3;NFYB;GZF1;FOXO3;BHLHE40;H3F3A;KLF13;ETV6;NONO;ZNF658;MXD1;RCOR2;RBBP4;SATB1;DDIT3;PRDM5;E2F3;CCAR1;DR1;ZNF639;GMEB1;HOXC6;SSBP4;CREM;ZNF131;THRB;TXK;PPARA;SMAD2;ETV4;THRA;SMAD1;TBL1XR1;NRF1;PPARG;PURB;KLF7;GMEB2;KLF10;ZBTB5;ATMIN;DMRT1;NR1I2;RCOR3;MLX;TAL2;HOXB2;ZBTB20;BACH2;UHRF1;NCOA2;NME1;JUN;NKRF;TOX3;SNAI2;PCGF5;SMA…	Thiocolchicoside	6	9.26862e-05	GABRE;GABRB1;GLRA1;GABRA6;GABRA4;GABRP
specification of symmetry	2	0.0347054	IFT74;TBX3	mitochondrial membrane	96	0.00105509	SLC25A24;PEBP1;VRK2;UQCRFS1;MCUR1;SLC25A53;SDHC;MRPS25;FKBP8;CYC1;MRPL28;AURKAIP1;HTRA2;HSPD1;TTC19;UQCR11;NDUFS6;MCU;MRPL37;SLC25A10;AGPAT4;MPV17L2;RNF144B;SLC25A30;NDUFA4;SLC25A5;UQCRH;NDUFA6;BAD;SLC25A3;IMMT;MRPL9;MRPL51;PPP2R2B;ATXN3;SLC25A44;MTG1;SLC25A43;NDUFAF4;RPS3;MRPL24;SLC11A2;GOT2;MICU3;SLC25A14;MRPL1;DUSP18;GHITM;NDUFV2;NDUFB9;RTN4IP1;TIMM10B;COX15;MRPL38;BCS1L;MFN2;UQCRC2;MRPS26;ANK…	negative regulation of mesenchymal cell apoptotic process	1	0.0296832	SOX9	transmission of nerve impulse	21	8.2526e-06	MYH14;SCN8A;KCNA1;SCN11A;CACNG3;SCN5A;GLRA1;CACNG2;SCN10A;SOD1;NTRK3;NFASC;GBA;JAM3;SCN4A;DMRT3;CACNA1I;TNR;CACNA1H;SCN9A;P2RX3	nuclear chromatin	70	0.000288817	PHF12;BRD9;PHF10;ETV3;SMARCD2;UBE2A;TTI2;ASF1A;MPHOSPH8;H3F3A;ARID1A;PLCB1;MXD1;RBBP4;H2AFX;SATB1;THRB;SMAD2;SMARCD1;PBRM1;CHRAC1;NPM2;UHRF1;JUN;BRMS1L;KAT8;SNAI2;ATRX;GATAD2A;MCMBP;CHAF1B;SIRT7;JUND;MEF2A;TAF4;MBD3;SIN3A;MYOCD;CREB1;MSH6;KLHDC3;H2AFY2;LDB1;BAZ1A;DHX9;NIPBL;SUDS3;CDK9;SMARCA2;USP3;YY1;SS18;DNMT3A;HIST1H2AI;ASXL1;TBX6;H2AFZ;TIMELESS;KAT6A;NCOR2;RAD17;TCF7L2;ING2;KLF1;APPL1;NR1H3;R…	cell-cell recognition	12	0.000102426	CATSPER2;UBAP2L;HSPA1L;FUT3;PCSK4;CLEC4M;TEX101;EPHB1;ADAM21;PRF1;FOLR3;CATSPER1
activation of Janus kinase activity	1	0.0348838	JAK2	ribosomal large subunit biogenesis	17	0.00106893	RPL10;BOP1;GTF3A;RPL35;RPL6;URB1;MRPL1;DHX30;FTSJ3;RPF2;NOC2L;ZNHIT6;RPLP0;PPAN;WDR74;NPM1;RPL10A	histidine metabolic process	1	0.0296832	HNMT	antimicrobial humoral immune response mediated by antimicrobial peptide	20	9.16209e-06	REG1B;S100A12;REG3G;PGLYRP3;DEFA5;KRT6A;DEFA1;DEFA4;S100A9;DEFB127;HRG;RNASE3;DEFA6;PGLYRP4;DEFB118;RPL30;CCL13;BPIFA1;MMP7;S100A7	heterocycle catabolic process	112	0.000307512	HINT1;ADAL;TIRAP;RPL13;ALDOA;NT5M;RPL10;ALKBH5;HNRNPA0;ANGEL2;NEIL2;CDADC1;IGF2BP2;CNOT10;UPF3A;MEX3D;RPL28;FMR1;TNRC6A;DROSHA;RNASEH1;P2RX7;NUDT16;AADAT;EXOSC6;DCPS;MAGOH;CNOT6;ENO3;HNRNPD;ENTPD4;CASP3;NUDT11;RPLP0;RNASET2;PGK1;PPARA;NUP214;PNP;NT5C1B-RDH14;CIRBP;ENO2;APAF1;RPL8;GAPDH;YWHAZ;CARHSP1;DIS3L;XPO1;ZC3H14;ZBTB20;RNPS1;PDE8B;SLC25A12;DNASE1L2;GEN1;AXIN2;KHSRP;RPS7;EIF6;SMG9;RNH1;ENTPD7…	Taurine	7	0.000109907	GABRE;GRIN2B;GABRB1;GLRA1;GABRA6;GABRA4;GABRP
regulation of skeletal muscle cell proliferation	1	0.0348838	JAK2	preribosome	17	0.00106893	BOP1;RPS7;HEATR1;BTRC;TBL3;IMP4;EMG1;KRR1;FTSJ3;WDR37;NOP56;NOC2L;MAK16;PPAN;NGDN;WDR74;UTP3	vinculin binding	1	0.0296832	ACTN1	Isoflurane	12	9.45041e-06	CHRNB2;CYP2B6;KCNA1;GLRA1;GABRB1;GABRE;GABRB3;GABRP;CHRNA4;GABRQ;GABRA3;CALM1	ubiquitin protein ligase activity	47	0.000308956	MED31;XIAP;RNF217;RNF139;TRIM25;RNF103;ITCH;NEDD4;PPIL2;MKRN1;CHFR;RNF150;FBXL12;RNF4;CBLC;UBE2K;MDM2;MED10;SH3RF3;UHRF1;UBR2;ZNRF3;VHL;HUWE1;FBXW11;ANKIB1;TRAIP;TRIM11;TRIM2;HLTF;MYLIP;MDM4;RNF144B;RNF138;MSL2;PJA1;BIRC2;ZNRF2;FBXO4;FANCL;BTRC;ANAPC5;UBE3A;MED27;CBL;RNF7;ARIH1	induction of bacterial agglutination	4	0.000125559	SPON2;DMBT1;FGA;FGB
lipid digestion	1	0.0348838	ARX	maturation of LSU-rRNA from tricistronic rRNA transcript (SSU-rRNA, 5.8S rRNA, LSU-rRNA)	6	0.00111252	BOP1;RPL35;URB1;FTSJ3;RPF2;ZNHIT6	BH domain binding	1	0.0296832	BAK1	cation transmembrane transporter activity	102	9.66121e-06	KCNE1;CHRNB2;SLC22A2;COX8C;SCN8A;GRIK5;SLC6A16;GRIN2B;SLC10A2;KCNQ2;KCNA1;KCNQ3;SLC5A2;SCN11A;SLC8A3;CACNG3;KCNB2;GRIN2A;KCNH1;SCN5A;KCNK18;TRPC4;ATP2B2;COX7B2;CACNG2;KCNT1;SCN10A;FAM155A;SLC4A8;NALCN;OPRM1;KCNK9;SLC24A1;RYR1;OTOP1;CACNA2D4;TMEM63C;KCNT2;CHRNA4;TRPC7;SLC6A1;TRPC3;SLC24A5;KCNG2;ATP13A5;CACNA1A;ATP6V1H;KCNN1;CNGA2;PKD2L1;RYR3;SLC11A2;TRPM2;SLC1A6;GRIK3;GRIN3B;COX6C;KCNE2;HCN4;SLC6A…	regulation of protein modification process	291	0.000317092	SMYD3;IGBP1;XIAP;FKBP1A;EIF2AK2;PPP2R1B;FKBP8;MAP3K8;TIRAP;AGT;FZD8;PWP1;VRK2;APIP;IL1F10;TOM1L1;SOX9;TIPRL;TTK;SPDYA;SOX4;IFNK;OTUD4;MAGED1;UBE2L3;ADAR;CHEK2;MMD;N4BP1;PLCB1;FMR1;EPHB4;CCNYL1;PDCD6;NDUFS4;PRKD1;P2RX7;HSP90AA1;SQSTM1;PLCL1;PPP2R3A;DDRGK1;G6PD;ITCH;DDR2;PTTG1IP;STYX;IMPACT;PHF23;NCAPG2;NPTN;ACVR1;PAXIP1;ADNP;TGFBR2;TNFRSF19;EPHA4;PHIP;GHR;BST1;CASP3;EIF3A;CCNH;CAPRIN2;AMER1;NNT;GB…	Felbamate	4	0.000125559	GRIN2B;GRIN2A;CYP2C9;CYP2C19
response to UV-C	1	0.0348838	BAK1	regulation of mitotic sister chromatid segregation	16	0.00111379	IK;HNRNPU;TTK;BUB1;GEN1;ZNF207;NIPBL;PSMG2;MAD2L1;CDC26;ANAPC4;TACC3;FBXO5;MAD2L2;DLGAP5;PTTG1	carbohydrate phosphatase activity	1	0.0296832	FBP1	eosinophil chemotaxis	10	9.90813e-06	CCL4L1;CCL3;CCL7;CCL8;CCL11;CCL2;CCL1;CCL13;HRH1;SCG2	nucleotide catabolic process	35	0.000318903	HINT1;ALDOA;NT5M;NEIL2;P2RX7;NUDT16;ENO3;ENTPD4;NUDT11;PGK1;PPARA;PNP;NT5C1B-RDH14;ENO2;GAPDH;ZBTB20;PDE8B;SLC25A12;EIF6;ACAT1;ENO4;PDE7B;GALK1;PRKAG2;PGAM1;UPP1;ADPGK;HDAC4;PFKFB1;FBP1;NEIL1;ENO1;NUDT10;INSR;ECD	Ixazomib	4	0.000125559	CYP2C8;CYP2B6;CYP2C9;CYP2C19
post-embryonic animal organ development	1	0.0348838	BAK1	ficolin-1-rich granule	33	0.00112028	SRP14;KRT1;COPB1;MAPK1;KPNB1;ACTR1B;PSMD6;TRPM2;IDH1;EEF2;COMMD3;APAF1;PSMB1;PNP;HMGB1;GYG1;HSPA8;IMPDH2;DYNLL1;MAPK14;FTH1;DBNL;PRG2;SERPINA1;PSMD7;PGAM1;CLEC4C;CAB39;LAMP2;JUP;GUSB;COMMD9;FPR1	sugar-phosphatase activity	1	0.0296832	FBP1	Clotrimazole	10	9.90813e-06	CYP2C8;CYP2B6;CYP2C19;CYP11B1;CYP3A4;CYP2C9;ABCB11;CYP11A1;NR1I3;CYP19A1	cullin-RING ubiquitin ligase complex	37	0.000327294	FBXO27;FBXL4;KLHL24;KCTD10;USP47;PDCD6;GAN;FBXW4;CUL9;KEAP1;FBXL12;FBXO2;TRIM21;FBXL5;FBXO33;ANAPC4;DEPDC5;KLHL25;FBXW11;KLHL13;CAND1;FBXW5;ZER1;CDC26;SPOP;FBXO4;UBE2C;FBXO9;KLHL7;BTRC;ANAPC7;ANAPC5;RNF7;KLHL42;DCAF5;ARIH1;DCAF16	Phenobarbital	8	0.00012557	GRIN2B;GRIN2A;CYP2C8;CYP2B6;GRIA2;CYP2C9;UGT1A1;CYP2C19
gonadotropin secretion	1	0.0348838	TBX3	energy derivation by oxidation of organic compounds	44	0.00113979	UQCRFS1;FAHD1;GSK3B;SDHC;CYC1;NDUFS6;GFPT2;IDH1;NDUFA4;UQCRH;NDUFA6;IGF2;PHKA2;ACSM1;HMGB1;GYG1;CDK1;MTFR1;SLC25A14;POLG2;RB1CC1;PHKA1;NDUFV2;NDUFB9;IDE;PHKG2;COX15;UQCRC2;NDUFS7;SLC25A22;MDH2;UQCRC1;DYRK2;NHLRC1;NDUFS8;NDUFB6;IMMP2L;NDUFAB1;NDUFV1;COQ10B;PHKB;UGP2;FXN;PID1	Salivary secretion	2	0.0300634	KCNN4;LYZ	Clotiazepam	10	9.90813e-06	CYP2B6;CYP2C19;GABRR2;GABRB1;GABRE;GABRB3;GABRP;CYP2C18;CYP3A4;GABRA3	nucleobase-containing small molecule interconversion	11	0.000329226	NUDT13;CTPS2;NME4;DCTD;GMPR2;GLRX;AK7;NME1;AK4;GUK1;DTYMK	defense response to Gram-positive bacterium	13	0.000126661	DEFB4B;DEFB104A;TLR2;LCE3A;DEFB107A;DEFA5;DMBT1;DEFB106A;DEFB128;LALBA;PGLYRP3;CRP;LYZL2
negative regulation of dendrite morphogenesis	1	0.0348838	TRPC5	nucleic acid phosphodiester bond hydrolysis	47	0.00114979	BOP1;PGBD5;CNOT6;KPNB1;RFC5;ST20;DICER1;PNRC2;NUDT21;GEN1;ERCC2;APTX;ABT1;APAF1;TSEN34;TSN;HMGB1;TDP1;POLR2I;PGAP1;APEX1;TSEN2;CPSF3;MEIOB;RNASET2;RPSA;APLF;PCNA;SLFN14;N4BP2;CNOT1;EME2;SMG5;RFC4;RNASE11;EXOSC7;RPP21;POLD4;DCLRE1A;USB1;CUL4B;RFC3;GTF2H1;CHD1L;POLD1;ASTE1;ERCC5	Small cell lung cancer	2	0.0319302	BAK1;ITGA2	Clobazam	11	1.02046e-05	CYP2B6;CYP2C19;GABRB1;GABRE;GABRB3;GABRP;CYP2C18;SLC6A1;GABRQ;CYP3A4;GABRA3	aromatic compound catabolic process	114	0.000338009	HINT1;ADAL;TIRAP;RPL13;ALDOA;NT5M;RPL10;ALKBH5;HNRNPA0;ANGEL2;NEIL2;CDADC1;IGF2BP2;CNOT10;UPF3A;MEX3D;RPL28;FMR1;TNRC6A;DROSHA;RNASEH1;P2RX7;NUDT16;AADAT;EXOSC6;DCPS;MAGOH;CNOT6;ENO3;HNRNPD;ENTPD4;CASP3;NUDT11;RPLP0;RNASET2;PGK1;PPARA;NUP214;PNP;PON2;NT5C1B-RDH14;CIRBP;ENO2;APAF1;RPL8;GAPDH;YWHAZ;CARHSP1;DIS3L;XPO1;ZC3H14;ZBTB20;RNPS1;PDE8B;SLC25A12;DNASE1L2;GEN1;AXIN2;KHSRP;RPS7;EIF6;SMG9;RNH1;L…	Flunitrazepam	6	0.000130349	CYP2B6;GABRA6;GABRA4;CYP2C9;UGT1A1;CYP2C19
tripartite regional subdivision	1	0.0348838	TBX3	regulation of DNA repair	23	0.00117364	NUDT16L1;WAS;RPS3;HMGB1;CDK9;CEBPG;FANCB;RNF8;RNF168;PPP4R2;PCNA;ERCC6;DDX11;BABAM1;H2AFX;MAD2L2;TRIP12;USP1;TERF2IP;RTEL1;UIMC1;HMGA2;AUNIP	extracellular structure organization	4	0.032119	FMOD;CTSK;SOX9;ITGA2	lipopeptide binding	7	1.16745e-05	TLR2;CD1A;CD1C;CD1D;CD1B;CD1E;TLR1	translational initiation	44	0.000342234	MIF4GD;EIF2AK2;EIF2S2;RPL13;RPL10;EIF4G3;EIF2S3;EIF1;RPL28;FMR1;EIF2B3;EIF5;EIF4E3;IMPACT;RPLP0;EIF3A;DDX1;NCK1;RPL8;EIF3M;EIF2B1;CDC123;DDX3X;DHX29;RPS7;EIF6;EIF2B4;KLHL25;RPL18A;YTHDF3;AGO2;EIF3K;EIF4A1;EIF4G2;EIF3H;RPLP1;RPS11;RPL30;EIF2AK3;RPL21;RPS3A;EIF2B5;PAIP2B;POLR2D	Brivaracetam	6	0.000130349	SCN4A;CYP2B6;SCN5A;SCN11A;CYP2C9;CYP2C19
anterior/posterior axis specification, embryo	1	0.0348838	TBX3	posttranscriptional regulation of gene expression	72	0.00120441	RNF139;MIF4GD;DHFR;HNRNPA0;PAIP2B;EIF5;RPL10;EIF3B;ZNF598;TIRAP;YWHAB;MAPK1;HNRNPU;CNOT6;SRP9;CAPRIN1;NCL;EIF4G2;EIF2AK2;MAGOH;ANGEL2;DICER1;RBM3;NUDT21;MPV17L2;RPS14;ZC3H14;YBX1;EEF2;YWHAZ;LSM14A;EIF2B4;SHMT1;POLR2J;HNRNPC;MTG1;SAMD4A;RPS3;POLR2I;TRMT10C;HSPA8;APOBEC1;KHSRP;DDX5;ATXN2;APEX1;EIF4B;PRG3;MAPK14;RMND1;CDC123;EIF2A;LRPPRC;EIF2B2;CNOT1;SMG5;MATR3;DPH7;XPO1;EIF3E;MTG2;YTHDF2;NGDN;EXOSC…	digestive system process	2	0.0325624	KCNN4;SOX9	antigen processing and presentation, endogenous lipid antigen via MHC class Ib	5	1.20426e-05	CD1A;CD1C;CD1D;CD1B;CD1E	nucleoside phosphate catabolic process	36	0.000347134	HINT1;ALDOA;NT5M;NEIL2;P2RX7;NUDT16;ENO3;ENTPD4;NUDT11;PGK1;PPARA;PNP;NT5C1B-RDH14;ENO2;GAPDH;ZBTB20;PDE8B;SLC25A12;EIF6;ACAT1;ENO4;PDE7B;GALK1;PRKAG2;PGAM1;UPP1;ADPGK;HDAC4;PFKFB1;SMPDL3A;FBP1;NEIL1;ENO1;NUDT10;INSR;ECD	immune response	119	0.000141754	DEFB4B;JAK2;HLA-DPB1;DEFB105A;DEFB104A;KIR3DL1;TNFAIP1;S100A14;TLR2;ANPEP;IFI35;IRF8;AICDA;GPR32;IRGM;TARM1;IL3;OTOP1;DHX58;CCL13;IFITM3;KLRG1;MUC16;CEACAM8;LILRA4;KLRB1;CLC;SERPINB6;PECAM1;APBB1IP;CST3;DEFB107A;SPON2;CYP11B1;DEFA5;A2M;DMBT1;PRKCB;C6;YES1;CLEC2A;NLRP9;S100A9;OPRM1;PRKCQ;DEFB124;CXCR6;MED1;CCL27;CCL2;PA2G4;LILRA1;CLEC4M;TREML4;PKP1;FGA;CLEC4D;C7;DEFB106A;NCF2;CLEC12B;C1QB;CMKLR1;A…
Ada2/Gcn5/Ada3 transcription activator complex	1	0.0348838	UBAP2L	hydrolase activity, acting on acid anhydrides	121	0.00121816	DHX16;DDX50;EIF5;MYH14;CCNH;HSPA9;ARF1;EIF4A1;RAB9B;DYNLRB2;PCYOX1;PSMD6;NUDT16L1;ATP6V1H;ARF5;KATNAL1;ENTPD7;DDX53;MCM6;RFC5;HSPD1;DICER1;HRAS;RRAS;SNRNP200;ERCC2;PEX1;NAV2;TUBB;ATP10A;NUDT22;EEF2;TDRD9;ABCB9;ATP6V0A2;HLTF;TOP2A;MTG1;TNNT1;RRAS2;ARF6;RAB26;RAB2A;GPN1;KIF5C;RAB36;KIF18A;NUDT15;KIF24;HSPA8;DDX5;RAD17;ENTPD8;RASA1;ABCC12;DYNLL1;ATP6V0B;DHX30;ARL8B;TUBB4B;TAPBP;IDE;ATP13A1;MFN2;GINS…	hydrolase activity, hydrolyzing O-glycosyl compounds	2	0.0325624	GLB1L;LYZ	lipid antigen binding	5	1.20426e-05	CD1A;CD1C;CD1D;CD1B;CD1E	ribose phosphate biosynthetic process	55	0.000353392	ADK;ATIC;PRPSAP2;ALDOA;UCKL1;CTPS2;NME4;SLC35B3;NME9;SLC25A1;APRT;P2RX7;PAPSS2;G6PD;ENO3;DLAT;ADCY3;PGK1;PPARA;UCK1;ENO2;PDK1;GAPDH;PPCS;PRPS1;ZBTB20;SLC25A12;NME1;EIF6;LDHC;ACAT1;SLC26A2;ENO4;GALK1;PRKAG2;AK4;AK3;SLC25A13;PGAM1;CYC1;GUK1;UPP1;ADPGK;HDAC4;PRPSAP1;PFKFB1;FBP1;SCD5;PID1;ENO1;ADSS;ELOVL2;DNAJC30;INSR;ECD	glutamate receptor activity	7	0.000142675	GRIN2B;GRIN2A;GRM6;GRIK3;GRM5;GRIK5;GRIA2
Pathways in cancer	4	0.0351246	JAK2;BAK1;GSTA1;GSTM5	hydrolase activity, acting on acid anhydrides, in phosphorus-containing anhydrides	121	0.00121816	DHX16;DDX50;EIF5;MYH14;CCNH;HSPA9;ARF1;EIF4A1;RAB9B;DYNLRB2;PCYOX1;PSMD6;NUDT16L1;ATP6V1H;ARF5;KATNAL1;ENTPD7;DDX53;MCM6;RFC5;HSPD1;DICER1;HRAS;RRAS;SNRNP200;ERCC2;PEX1;NAV2;TUBB;ATP10A;NUDT22;EEF2;TDRD9;ABCB9;ATP6V0A2;HLTF;TOP2A;MTG1;TNNT1;RRAS2;ARF6;RAB26;RAB2A;GPN1;KIF5C;RAB36;KIF18A;NUDT15;KIF24;HSPA8;DDX5;RAD17;ENTPD8;RASA1;ABCC12;DYNLL1;ATP6V0B;DHX30;ARL8B;TUBB4B;TAPBP;IDE;ATP13A1;MFN2;GINS…	epithelial cell proliferation involved in prostate gland development	1	0.0326035	SOX9	serotonin receptor activity	13	1.22141e-05	OR10H2;HTR2A;HRH2;OR6T1;OR10H5;CHRM3;HTR1E;HTR5A;OR10J5;HRH1;OR10H3;HTR4;OR10H1	positive regulation of protein metabolic process	271	0.000359984	SMYD3;MIF4GD;XIAP;FKBP1A;EIF2AK2;BBS7;RNF217;MAP3K8;TIRAP;AGT;FZD8;RNF139;IL1F10;TOM1L1;SOX9;TTK;SPDYA;SOX4;UPF3A;IFNK;MAGED1;UBE2L3;CHEK2;MMD;PLCB1;FMR1;EPHB4;CCNYL1;PDCD6;PRKD1;P2RX7;HSP90AA1;SQSTM1;DDRGK1;ITCH;DDR2;PCOLCE;PTTG1IP;IMPACT;AURKA;PHF23;F3;NCAPG2;NPTN;ACVR1;PAXIP1;NEDD4;ADNP;TGFBR2;TNFRSF19;EPHA4;GHR;HNRNPD;SH3D19;CASP3;CAPRIN2;AMER1;APC2;LARP4B;GBA;RAPGEF2;RPS27L;CHFR;SORL1;ANTXR1…	Ketoconazole	7	0.000142675	CYP21A2;CYP2C8;CYP2B6;CYP11B1;CYP2C9;UGT1A1;CYP2C19
embryonic limb morphogenesis	2	0.0352177	HOXA10;TBX3	respiratory chain	21	0.00124563	UQCRFS1;SDHC;CYC1;TTC19;UQCR11;NDUFS6;NDUFA4;UQCRH;NDUFA6;NDUFV2;NDUFB9;COX15;BCS1L;UQCRC2;NDUFS7;UQCRC1;COX8C;NDUFS8;NDUFB6;NDUFAB1;NDUFV1	cerebral cortex GABAergic interneuron differentiation	1	0.0326035	ARX	Diazepam	13	1.22141e-05	CYP2C8;CYP2B6;CYP2C19;GABRR2;GABRB1;GABRE;GABRB3;GABRP;CYP2C18;GABRQ;CYP3A4;CYP2C9;GABRA3	glycosaminoglycan biosynthetic process	28	0.000370197	HS2ST1;GLCE;CHSY3;UGDH;XYLT2;B4GALT3;B4GALT6;B3GNT4;FMOD;ST3GAL3;EXT2;CHST13;GALNT5;UST;GPC4;GPC6;SDC2;HS6ST1;PXYLP1;SLC35D2;B4GALT2;SLC35D1;HEXA;ANGPT1;CHPF2;HS3ST3B1;ST3GAL4;CSPG5	inflammasome complex	5	0.000169811	NLRP9;AIM2;CARD8;NLRP1;CASP5
embryonic appendage morphogenesis	2	0.0352177	HOXA10;TBX3	ubiquitin-protein transferase activity	60	0.00128044	RNF31;RNF139;CDC34;MED31;FBXW5;ZNF598;RNF208;TRIM3;BIRC6;MKRN1;SYVN1;RCHY1;ARIH2;XIAP;RNF4;BTRC;UBE2E1;FBXO45;RNF144B;ASB2;RBCK1;RNF182;WSB1;HLTF;TRIM21;CUL2;RNF167;FBXO11;SIAH3;MED21;RNF181;RNF126;NEDD4;UBE2S;RNF8;WDSUB1;FBXO25;RNF168;UBE2L3;RNF19B;ANAPC4;RNF6;NSMCE1;ERCC8;VHL;UBE2C;CBLC;RNF170;FBXO24;TRIP12;NHLRC1;UBE2K;PRPF19;RNF114;CUL4B;RNF150;ARIH1;RNF103;RNF130;FBXO9	bronchus development	1	0.0326035	SOX9	odorant binding	23	1.23809e-05	OBP2A;OR10V1;OR11L1;OBP2B;OR14A16;OR5AU1;OR5A1;OR6B3;OR14J1;OR5P3;OR5L1;OR5W2;OR5AN1;OR5P2;OR5D13;OR5D18;OR6B2;OR5AK2;OR5AS1;OR9K2;OR5D14;OR5B21;OR5A2	regulation of cell cycle phase transition	77	0.00037305	JADE1;ERCC2;SDCCAG8;BUB1;TUBB;TTK;SOX4;CNOT10;ZNF207;WEE1;CHEK2;USP47;PLCB1;HSP90AA1;DDRGK1;AURKA;MEPCE;PAXIP1;CNOT6;NDE1;ERCC3;DYNLL1;NAE1;RPS27L;GTSE1;CLSPN;YWHAG;MDM2;XRCC3;IK;NPM2;DDX3X;GEN1;ANAPC4;PAFAH1B1;PKD2;PPP2R1A;BAX;UBE2E1;CDKN1A;SIN3A;CEP152;MSH6;CDKN1C;MDM4;RINT1;RAD21;FGFR1OP;PIDD1;TUBB4B;BABAM1;BRD4;PRKACA;CASP2;CDC26;E2F8;UBE2C;TAOK3;DYRK3;RAD17;MYO16;CCNE1;DACT1;BTRC;NEK11;PSME1…	Methylphenobarbital	5	0.000169811	CYP2B6;GABRA6;GABRA4;GRIA2;CYP2C19
positive regulation of cysteine-type endopeptidase activity involved in apoptotic process	2	0.0352177	JAK2;BAK1	COPII-coated ER to Golgi transport vesicle	19	0.00128062	PDCD6;SEC24D;TMED4;HLA-F;IER3IP1;TMED3;GOSR2;YIF1A;ERGIC3;KLHL12;CNIH1;MCFD2;SEC23A;LMAN1;SERPINA1;SEC13;STX5;VTI1A;HLA-DPA1	positive regulation of phagocytosis, engulfment	1	0.0326035	ITGA2	serotonin receptor signaling pathway	14	1.40918e-05	OR10H2;HTR2A;HRH2;OR6T1;OR10H5;CHRM3;HTR1E;HTR5A;OR10J5;HRH1;OR10H3;HTR4;OR10H1;HTR3E	pyrimidine-containing compound salvage	7	0.000376467	UCKL1;HDDC2;UCK1;TK2;TK1;CDA;UPP1	eosinophil chemotaxis	6	0.000179187	CCL13;CCL2;CCL7;CCL1;CCL4L1;CCL11
integrin binding	2	0.0362511	CD226;ACTN1	histone modification	68	0.0012914	PCGF5;EZH2;BRMS1L;POLE4;NCOA3;KMT2B;PRDM4;C6orf89;UBE2E1;NTMT1;NIPBL;IWS1;PADI1;KDM5B;JADE1;MEN1;KMT2D;PADI2;ATXN3;PHF2;ZNF451;IGF2;NR1H4;PRKD1;PYGO2;PCGF6;ENY2;PCGF1;GCG;TAF6L;CDK9;CDK1;CTCF;PWP1;HIST1H1C;RNF8;RNF168;PRDM5;MIER1;MSL1;PRDM6;YEATS2;ZNF304;SRCAP;KMT2E;DMRTC2;COPRS;NOC2L;KANSL2;PRMT8;TAF10;WBP2;TRIP12;RLF;SUPT6H;TAF5L;USP22;TBL1XR1;PHB;ATXN7L3;PADI3;CUL4B;UIMC1;HMGA2;PADI4;SFPQ;PRMT…	positive regulation of membrane invagination	1	0.0326035	ITGA2	ion transmembrane transporter activity	131	1.41675e-05	KCNE1;CHRNB2;SLC22A2;COX8C;SCN8A;GRIK5;SLC6A16;GRIN2B;SLC10A2;KCNQ2;KCNA1;KCNQ3;SLC5A2;SCN11A;SLC8A3;SLC25A24;ANO5;CACNG3;SLC35A1;GABRR2;BEST2;KCNB2;GRIN2A;KCNH1;SCN5A;KCNK18;TRPC4;ATP2B2;COX7B2;GLRA1;CACNG2;GABRB1;KCNT1;SCN10A;FAM155A;SLC4A8;NALCN;GABRE;ANO2;OPRM1;KCNK9;SLC35A5;SLCO3A1;SLC24A1;RYR1;NMUR2;OTOP1;GABRB3;GABRP;CACNA2D4;TMEM63C;GLRA3;KCNT2;CHRNA4;TRPC7;GRID1;SLC6A1;TRPC3;SLC24A5;KCNG…	Huntington disease	44	0.000385581	COX7C;VDAC3;PLCB1;SDHC;NDUFS4;VDAC2;CASP3;AP2B1;POLR2L;DNAH8;NRF1;APAF1;ITPR1;PPARG;NDUFB2;NDUFS8;VDAC1;POLR2C;HIP1;NDUFS2;BAX;TAF4;SIN3A;NDUFB4;PPIF;CREB1;CYC1;PLCB4;NDUFB7;AP2M1;UCP1;CLTCL1;POLR2I;NDUFA4;UQCRC1;UQCRFS1;CREB5;UQCRC2;NDUFV3;POLR2D;DNAH7;NDUFA6;UQCR11;TP53	Butabarbital	6	0.000179187	GABRE;GABRB1;GABRA6;GABRA4;GRIA2;GABRP
wound healing	4	0.0363896	JAK2;ACTN1;ANXA8;CSRP1	mitotic nuclear division	46	0.0013014	EPS8;PEBP1;IK;FBXW5;HNRNPU;KPNB1;TTN;TTK;AURKAIP1;CCNI;BUB1;GEN1;ZNF207;NIPBL;PSMG2;IGF2;MAD2L1;KIF18A;CDC16;PRC1;BORA;CHEK2;ANLN;CHMP2A;CDC26;UBE2S;SH2B1;PHF23;ANAPC4;CCND1;TACC3;KIFC1;FBXO5;UBE2C;NCAPH;MAD2L2;DLGAP5;PTTG1;CEP192;PDS5B;CHAMP1;CDKN1B;CHMP7;BCCIP;MAD2L1BP;EPGN	limb bud formation	1	0.0326035	SOX9	positive regulation of immune response	109	1.42277e-05	RNF31;CLEC4D;CLEC4C;NLRC4;REG3G;LILRA4;BTNL9;COL20A1;SLAMF6;MARCO;DMBT1;FPR1;FGA;TLR2;HLA-DQA2;PGLYRP3;MUC16;BTNL8;MICB;NLRP10;PRKCB;A2M;CMKLR1;VSIG4;FPR3;FCGR2B;PHB;FCGR2A;KRT1;HLA-DPA1;GPR32;HMGB1;AIM2;HLA-DPB1;FCN1;FCGR3A;PRKCQ;FGG;ITK;IL21;CD3G;IL18RAP;PLCG2;CD1A;S100A9;LILRB1;HLA-DQA1;HLA-F;MUC5AC;LCP2;CD1C;S100A8;PYHIN1;LSM14A;FCN2;FCRL3;MUC19;TRIM15;HRG;CRTAM;IGLL5;DDX58;HRAS;CLEC4E;FGB;BT…	regulation of translational initiation	22	0.000390676	MIF4GD;EIF2AK2;EIF4G3;EIF1;FMR1;EIF5;IMPACT;DDX1;NCK1;CDC123;DDX3X;DHX29;KLHL25;YTHDF3;AGO2;EIF3K;EIF4G2;EIF3H;EIF2AK3;EIF2B5;PAIP2B;POLR2D	Butalbital	6	0.000179187	GABRE;GABRB1;GABRA6;GABRA4;GRIA2;GABRP
heme binding	2	0.0367722	JAK2;HBZ	sister chromatid segregation	33	0.00135363	IK;HNRNPU;KPNB1;TTN;TTK;BUB1;GEN1;ZNF207;NIPBL;PSMG2;TOP2A;MCMBP;MAD2L1;KIF18A;PRC1;CTCF;CHMP2A;CDC26;PHF23;ANAPC4;TACC3;DDX11;KIFC1;FBXO5;NCAPH;MAD2L2;DLGAP5;PTTG1;RAD51C;PDS5B;CHAMP1;CHMP7;SFPQ	positive regulation of gonad development	1	0.0326035	SOX9	divalent inorganic cation transport	76	1.46189e-05	CHRNB2;FGF2;GRIN2B;CCL4L1;HTR2A;GRM6;CCL3;SLC8A3;CD84;RCVRN;CACNG3;GRIN2A;PRKCB;PMPCA;TRPC4;ATP2B2;ADCYAP1R1;CACNG2;PHB;FFAR1;FAM155A;NALCN;TRDN;OPRM1;SLC24A1;RYR1;NMUR2;ANK2;CCL8;CACNA2D4;PLCG2;CHRNA4;TRPC7;LILRB1;TRPC3;SLC24A5;BDKRB1;CACNA1A;CRH;FCRL3;PKD2L1;CCL2;RYR3;SLC11A2;TRPM2;FGF14;GRIN3B;KCNE2;TRPC6;DHRS7C;STAC;TCN1;METTL21C;CACNA1E;ZDHHC17;UBASH3B;SLC39A6;CACNA1B;CACNA1I;CEMIP;PLCZ1;RYR…	ADP metabolic process	24	0.000396366	ALDOA;P2RX7;ENO3;PGK1;PPARA;ENO2;GAPDH;ZBTB20;SLC25A12;EIF6;ENO4;BAD;GALK1;PRKAG2;AK4;AK3;PGAM1;ADPGK;HDAC4;PFKFB1;FBP1;ENO1;INSR;ECD	Talbutal	6	0.000179187	GABRE;GABRB1;GABRA6;GABRA4;GRIA2;GABRP
membrane raft	3	0.0369647	JAK2;CD226;TRPC5	nucleolar part	32	0.00139064	SPATA2;BOP1;HEATR1;DUSP11;BTRC;CCDC137;CD3EAP;TBL3;IMP4;FOXA1;EEF1D;SAMD4A;STOX1;URB1;EIF3L;ANKRD1;GAR1;WDR37;NOP10;NOP56;DDX11;THAP1;SMARCA5;YY1AP1;POLR1C;SUMO1;POLR1E;RPP21;DCLRE1A;POLR2L;UBTF;ZNF415	metanephric tubule morphogenesis	1	0.0326035	SOX9	Cocaine	9	1.54589e-05	CYP2C8;SLC22A2;SCN11A;SCN5A;SCN10A;CES1;CYP3A4;CYP2C9;SLC6A3	hexose biosynthetic process	24	0.000396366	ALDOA;SLC35B4;GPD2;SLC25A1;ENO3;PGK1;PPARA;ENO2;GAPDH;LEPR;SLC25A12;SDS;FOXO1;SLC25A13;PGAM1;PER2;MAEA;RANBP2;PFKFB1;GCG;SOGA1;FBP1;SUPT20H;ENO1	Alprazolam	6	0.000179187	GABRE;GABRB1;GABRA6;GABRA4;GABRP;CYP2C9
negative regulation of lipase activity	1	0.0371667	ANXA8	regulation of mitotic sister chromatid separation	14	0.0013914	IK;TTK;BUB1;GEN1;ZNF207;PSMG2;MAD2L1;CDC26;ANAPC4;TACC3;FBXO5;MAD2L2;DLGAP5;PTTG1	response to parathyroid hormone	1	0.0326035	ITGA2	Ketobemidone	9	1.54589e-05	CYP2C8;CYP2B6;GRIN2B;CYP2C19;GRIN2A;OPRM1;GRIN3B;CYP3A4;CYP2C9	Non-alcoholic fatty liver disease (NAFLD)	36	0.000398411	COX7C;SDHC;NDUFS4;ITCH;DDIT3;CASP3;PPARA;ADIPOR1;LEPR;GSK3B;MLX;NDUFB2;JUN;NDUFS8;MAP3K5;NDUFS2;BAX;PRKAG2;NDUFB4;CYC1;NDUFB7;NDUFA4;PRKAB1;UQCRC1;SREBF1;UQCRFS1;AKT2;EIF2AK3;UQCRC2;MLXIP;AKT3;NDUFV3;INSR;NR1H3;NDUFA6;UQCR11	Metharbital	6	0.000179187	GABRE;GABRB1;GABRA6;GABRA4;GRIA2;GABRP
skeletal muscle cell proliferation	1	0.0371667	JAK2	organonitrogen compound biosynthetic process	222	0.00141892	RNF139;ALG12;MIF4GD;DHFR;DTYMK;RPL21;PAIP2B;EIF5;ZDHHC17;RPL10;EIF2S2;EIF3B;RPLP2;ZNF598;GBA;RPL37A;TIRAP;RPL22L1;ZDHHC5;MAPK1;CNOT6;ALG1;EIF4A1;SRP9;DCN;RPS7;CAPRIN1;NCL;EIF4G2;EIF2AK2;SYVN1;TLR1;RPL30;IL15;C1GALT1C1;RPN1;MRPS25;RPS15A;PMM2;RPS3A;CYC1;MAGOH;ARG2;MRPL28;AURKAIP1;SMPD1;SPTLC2;APIP;PAICS;GUCY1A2;SLC6A3;MRPL37;RBM3;PCYT1A;AIMP1;AGPAT4;RPL35;RPS8;RPL8;RPLP1;ENO3;MPV17L2;GFPT2;RPS14;M…	phosphatidylcholine transporter activity	1	0.0326035	PCTP	antimicrobial humoral response	27	1.6179e-05	REG1B;S100A12;REG3G;DMBT1;FGA;PGLYRP3;DEFA5;KRT6A;DEFA1;DEFA4;RNASE2;S100A9;S100A8;DEFB127;HRG;RNASE3;DEFA6;FGB;PGLYRP4;DEFB118;RPL30;CCL13;BPIFA1;MMP7;PRTN3;S100A7;CTSG	cell cycle checkpoint	48	0.000402258	NSUN2;BUB1;TIPRL;TTK;SOX4;CNOT10;ZNF207;WEE1;CHEK2;H2AFX;AURKA;CNOT6;ZWINT;NABP1;NAE1;RPS27L;GTSE1;CHFR;CLSPN;MDM2;XRCC3;RAD9B;IK;GEN1;BAX;DCLRE1B;CDKN1A;MSH6;MDM4;RINT1;CLOCK;ATRIP;PIDD1;BABAM1;CDC5L;INTS3;CASP2;E2F8;TIMELESS;FBXO4;TAOK3;PPP1R10;RAD17;NEK11;PCNA;CDK2;RNASEH2B;TP53	Ketamine	7	0.000182931	SLC6A2;CYP2C8;CYP2B6;OPRM1;HTR1E;CYP2C9;HTR2A
regulation of cysteine-type endopeptidase activity involved in apoptotic signaling pathway	1	0.0371667	JAK2	DNA replication factor C complex	4	0.00145688	RFC5;PCNA;RFC4;RFC3	m7G(5')pppN diphosphatase activity	1	0.0326035	NUDT7	antigen processing and presentation of exogenous antigen	30	1.757e-05	CTSV;HLA-DQA2;VAMP3;HLA-DOB;FCGR2B;HLA-DPA1;HLA-DPB1;ACTR1B;AP3D1;CAPZA3;KIF5A;CD1A;HLA-DQA1;HLA-F;CD1C;SEC13;KIF2B;ARF1;HLA-DMB;CD1D;CD1B;HLA-DOA;OSBPL1A;CD1E;SEC24D;KIF26A;CALR;SNAP23;HLA-DRA;VAMP8	pyrimidine-containing compound biosynthetic process	18	0.000406262	UCKL1;CTPS2;NME4;HDDC2;CDADC1;NME9;DCTD;UCK1;TK2;PRPS1;NME1;CDS2;CMPK2;TK1;CDA;UPP1;SHMT1;DTYMK	metal ion transmembrane transporter activity	37	0.000187312	CATSPER2;TRPC5;SLC5A2;KCNK9;RYR3;GRIN2B;SLC6A2;KCNB2;GRIN2A;SLC1A6;KCNA1;ASIC2;SCN4A;GRIK3;KCNT2;OPRM1;TMEM38A;ASIC5;KCNK18;KCNQ3;CACNG2;KCNA4;KCNIP4;JPH3;KCNT1;KCNV1;ATP2B2;CACNG3;GRIK5;NALCN;SCN5A;SCN11A;SLC6A9;SLC5A7;KCNQ2;CACNA1A;CATSPER1
immune response to tumor cell	1	0.0371667	CD226	endoplasmic reticulum unfolded protein response	23	0.00150125	EIF2AK2;SYVN1;TMEM33;DNAJB9;SRPRB;DNAJB11;HSP90B1;KLHDC3;GOSR2;YIF1A;COPS5;DDIT3;ATF3;VAPB;CCND1;DDX11;CDK5RAP3;PTPN1;ARFGAP1;ASNA1;ATF6B;CREB3L4;DERL1	phospholipase A1 activity	1	0.0326035	PLA1A	steroid hydroxylase activity	13	1.79005e-05	CYP2C8;CYP2B6;CYP2C19;CYP11B1;CYP2C18;CYP2F1;CYP11B2;CYP3A4;CYP2C9;CYP11A1;CYP21A2;CYP2A13;CYP19A1	protein catabolic process	157	0.000417336	BBS7;RNF217;RNF139;ATE1;UBE2A;TOM1L1;SOX9;CDC34;USP18;TRIM25;FBXL4;PCYOX1;UBE2L3;RNF103;KCTD10;CHEK2;USP47;ERLIN2;N4BP1;USP11;DNAJB9;FMR1;P2RX7;HSP90AA1;SQSTM1;DDRGK1;ITCH;DDIT3;EGLN1;PTTG1IP;STYX;AURKA;ANKZF1;NEDD4;USP45;EPHA4;USP12;RNF187;FBXW4;SH3D19;CUL9;AMER1;APC2;GBA;AP2B1;UGGT1;CHFR;ZFAND2B;SORL1;KEAP1;RNF150;FBXL12;RNF4;CBLC;UBE2I;FBXO2;TBL1XR1;UBE2K;MDM2;FBXL5;BNIP3L;GSK3B;BIRC6;XPO1;SF3…	defense response to fungus	8	0.000190272	SPON2;DEFA5;S100A9;DEFB106A;S100A12;COTL1;MPO;NLRP10
regulation of protein import into nucleus, translocation	1	0.0371667	JAK2	regulation of mRNA processing	26	0.00152984	RBM15B;CCNT1;HNRNPU;U2AF2;SAFB;RBM5;SRSF3;MAGOH;PTBP1;RBM3;NUDT21;ZC3H14;IWS1;RBM11;RBFOX3;CDK9;HSPA8;DDX5;DDX17;RBM15;SUPT6H;TRA2A;SREK1;PRPF19;RBM25;NUP98	S-adenosyl-L-homocysteine	1	0.0326035	HNMT	transmembrane transporter activity	150	2.03873e-05	KCNE1;ABCC12;GJA10;CHRNB2;SLC22A2;COX8C;SCN8A;GRIK5;SLC6A16;GRIN2B;SLC10A2;KCNQ2;KCNA1;KCNQ3;SLC5A2;SCN11A;SLC8A3;SLC25A24;ANO5;CACNG3;SLC35A1;GABRR2;BEST2;KCNB2;GRIN2A;KCNH1;SCN5A;KCNK18;TRPC4;ATP2B2;COX7B2;GLRA1;CACNG2;GABRB1;KCNT1;SCN10A;FAM155A;SLC4A8;NALCN;GABRE;ANO2;OPRM1;KCNK9;SLC35A5;SLCO3A1;SLC24A1;RYR1;NMUR2;OTOP1;SLC25A53;GABRB3;GABRP;CACNA2D4;TMEM63C;GLRA3;KCNT2;CHRNA4;TRPC7;GRID1;SLC…	nuclear chromosome part	101	0.000420153	PHF12;BRD9;PHF10;GAR1;ETV3;SMARCD2;UBE2A;TERF2;POT1;BUB1;TTI2;ASF1A;MPHOSPH8;THOC3;H3F3A;STAG3;ARID1A;PLCB1;ERCC5;MXD1;RBBP4;H2AFX;SATB1;AURKA;THRB;NABP1;SMAD2;SMARCD1;UBE2I;XRCC3;ACD;PURB;RAD9B;PBRM1;CHRAC1;NPM2;UHRF1;JUN;BRMS1L;KAT8;SNAI2;ORC5;ATRX;TERF1;POLE2;TOP1;GATAD2A;MCMBP;TINF2;POLD2;CHAF1B;SIRT7;JUND;MEF2A;DCLRE1B;TAF4;MBD3;SIN3A;MYOCD;CREB1;MSH6;KLHDC3;H2AFY2;LDB1;BAZ1A;DHX9;NIPBL;SUDS…	cysteine-type endopeptidase inhibitor activity	10	0.000196447	CSTL1;CST8;CST9L;CST3;BIRC8;CST5;CST2;SERPINB3;SERPINB13;LCN1
heterochromatin organization	1	0.0371667	SMCHD1	damaged DNA binding	16	0.00155427	MUTYH;ERCC2;APTX;RPS3;HMGB1;SDE2;APEX1;POLI;FANCG;PCNA;H2AFX;DCLRE1A;CUL4B;MSH2;POLD1;AUNIP	cell-substrate junction assembly	2	0.0331996	ACTN1;ITGA2	divalent metal ion transport	75	2.093e-05	CHRNB2;FGF2;GRIN2B;CCL4L1;HTR2A;GRM6;CCL3;SLC8A3;CD84;RCVRN;CACNG3;GRIN2A;PRKCB;PMPCA;TRPC4;ATP2B2;ADCYAP1R1;CACNG2;PHB;FFAR1;FAM155A;NALCN;TRDN;OPRM1;SLC24A1;RYR1;NMUR2;ANK2;CCL8;CACNA2D4;PLCG2;CHRNA4;TRPC7;LILRB1;TRPC3;SLC24A5;BDKRB1;CACNA1A;CRH;FCRL3;PKD2L1;CCL2;RYR3;SLC11A2;TRPM2;FGF14;GRIN3B;KCNE2;TRPC6;DHRS7C;STAC;METTL21C;CACNA1E;ZDHHC17;UBASH3B;SLC39A6;CACNA1B;CACNA1I;CEMIP;PLCZ1;RYR2;JPH…	mitochondrial membrane	124	0.000429378	MRPL28;COX7C;FKBP8;MRPL44;MRPL46;TIMMDC1;VRK2;MRPS18A;VDAC3;COX11;MRPS10;SLC25A44;GPD2;CHDH;NME4;ARMCX2;MCUR1;STARD13;MRPL17;NDUFAF1;IMMT;SLC25A1;FOXO3;STARD7;ARMCX6;MRPS25;CISD1;SDHC;NDUFS4;MFN2;BNIP1;BRI3BP;TMEM177;TTC19;ANKZF1;VDAC2;BIK;EPHA4;MFN1;SFXN4;TMEM14C;TMEM126A;NNT;MTHFD2L;COQ10B;IMMP2L;DMPK;FPGS;BNIP3L;SIRT5;SFXN1;MTG1;DDX3X;SLC25A12;NME1;NDUFB2;UQCC1;SLC27A1;NDUFAF5;NDUFS8;MFF;VDAC1…	Ethanol	11	0.000202051	GABRE;CYP2B6;GABRB1;CACNG2;GLRA1;GABRA6;GABRA4;GRIA2;GABRP;CYP2C9;CYP2C19
negative regulation of double-strand break repair via homologous recombination	1	0.0371667	SMCHD1	ciliary basal body-plasma membrane docking	20	0.00155755	CCP110;TUBB;TMEM67;YWHAG;B9D2;KIF24;CENPJ;CDK1;SDCCAG8;DYNLL1;TUBB4B;DCTN3;HAUS2;CEP192;CSNK1D;CNTRL;PRKACA;CEP70;AHI1;ODF2	cellular amide metabolic process	7	0.0344305	NUDT7;ACOT2;MRPL15;GSTM5;COA3;BTG2;ITGA2	positive regulation of immune system process	142	2.11457e-05	RNF31;CHRNB2;CLEC4D;CLEC4C;CLECL1;PDGFD;NLRC4;REG3G;LILRA4;CCL4L1;BTNL9;COL20A1;SLAMF6;IL17A;MARCO;DMBT1;IL7;FPR1;CCL3;FGA;TLR2;HLA-DQA2;CD84;PGLYRP3;MUC16;VAMP3;BTNL8;MICB;NLRP10;PRKCB;A2M;CMKLR1;VSIG4;FPR3;FCGR2B;PHB;BTLA;FCGR2A;KRT1;HLA-DPA1;GPR32;HMGB1;AIM2;HLA-DPB1;FCN1;FCGR3A;PRKCQ;CCL7;TSLP;FGG;ITK;AP3D1;IL21;CCL8;CD3G;IL18RAP;PLCG2;CD1A;S100A9;LILRB1;HLA-DQA1;HLA-F;MUC5AC;IGF2;BDKRB1;LCP2…	positive regulation of GTPase activity	79	0.000433662	GDI1;TBC1D25;RSU1;TBC1D22B;RGS1;STARD13;TBC1D10B;ACAP2;PLCB1;ARHGDIB;FAM13A;DOCK10;ARHGAP18;EIF5;ARHGAP20;OCRL;ARHGAP21;BNIP2;ARHGAP33;SRGAP2;APC2;ARFGAP2;RAPGEF2;TBC1D19;ELMOD1;ARHGAP12;ARHGAP1;RABGAP1L;TBC1D4;AGFG1;RANBP1;ARHGAP4;GSK3B;ARFGAP3;RAP1A;PRTN3;SIPA1L1;JUN;TBC1D15;CAV2;ARAP3;DEPDC5;ARHGAP26;ARHGAP11B;ARHGEF6;IQGAP1;ARHGAP10;ARHGAP29;GNB5;CRK;TRIP10;ECT2;CCL23;TBC1D1;PKP4;RGS5;RANBP2;…	response to bacterium	46	0.000233156	DEFB4B;JAK2;DEFB105A;SCGB1A1;DEFB104A;SPAG11B;S100A14;TLR2;IRF8;AICDA;IRGM;DHX58;LCE3A;DEFB107A;SPON2;DEFA5;DMBT1;HPGD;S100A9;OPRM1;DEFB124;LRAT;CCL2;FGA;CLEC4D;DEFB106A;S100A12;DEFB128;LALBA;LPO;LILRB1;SYK;CARD8;TREM2;NLRP1;MPO;DEFB123;DEFB115;FGB;PGLYRP3;DEFB116;CLPS;UGT1A1;NLRP10;CRP;LYZL2
membrane microdomain	3	0.0372634	JAK2;CD226;TRPC5	nucleotide-excision repair, DNA incision	11	0.0015586	RFC5;ERCC2;PCNA;RFC4;POLD4;CUL4B;RFC3;GTF2H1;CHD1L;POLD1;ERCC5	collagen metabolic process	2	0.0344886	CTSK;ITGA2	single fertilization	32	2.15552e-05	BSPH1;SMCP;SERPINA10;LYZL6;GLRA1;RNASE10;OR1D2;TRPC7;TRPC3;CATSPERG;PCSK4;IQCF1;SYT8;SPACA7;TRPC6;EQTN;LCN6;FAM170B;PLB1;SLIRP;SPAM1;PAEP;PLCZ1;OR10J1;CACNA1H;FETUB;IZUMO1R;WEE2;ASTL;ADAM21;CATSPER1;KCNU1	monosaccharide biosynthetic process	25	0.000471303	ALDOA;SLC35B4;GPD2;SLC25A1;G6PD;ENO3;PGK1;PPARA;ENO2;GAPDH;LEPR;SLC25A12;SDS;FOXO1;SLC25A13;PGAM1;PER2;MAEA;RANBP2;PFKFB1;GCG;SOGA1;FBP1;SUPT20H;ENO1	Enasidenib	6	0.000241406	CYP2C8;CYP2B6;UGT2B15;CYP2C9;UGT1A1;CYP2C19
hemopoiesis	5	0.0378411	JAK2;TRIM58;BAK1;ACTN1;HBZ	DNA damage response, detection of DNA damage	11	0.0015586	RFC5;RPS3;MRPS26;PCNA;RFC4;USP1;POLD4;CUL4B;HMGA2;RFC3;POLD1	actin filament	2	0.0351403	AKAP13;ACTN1	immune response-regulating cell surface receptor signaling pathway	59	2.25711e-05	RNF31;CLEC4D;CLEC4C;LILRA4;BTNL9;FPR1;HLA-DQA2;MUC16;BTNL8;MICB;PRKCB;CMKLR1;CLEC12B;FPR3;FCGR2B;BTLA;FCGR2A;HLA-DPA1;GPR32;MS4A2;HLA-DPB1;FCN1;FCGR3A;CD200R1;PRKCQ;ITK;CD3G;PLCG2;LILRB1;HLA-DQA1;MUC5AC;LCP2;FCRL3;MUC19;IGLL5;HRAS;CLEC4E;BTN2A2;ARPC4;MYH2;MOG;RFTN1;FCER1A;BCL10;RPS3;RBCK1;BTK;MAPK1;MUC5B;HLA-DRA;BAG6;MUC6;WNK1;MUC4;ELMO1;CALM1;C5AR1;MUC21;GCSAML	nucleotide-sugar biosynthetic process	10	0.000472625	TSTA3;PMM1;UGDH;MPI;GMDS;UAP1L1;PMM2;NAGK;SLC35D1;UXS1	response to fungus	9	0.0002419	SPON2;DEFA5;S100A9;DEFB106A;S100A12;COTL1;SYK;MPO;NLRP10
movement of cell or subcellular component	9	0.0379396	IFT74;JAK2;TRIM58;LURAP1;S100A14;DEFB4B;ARX;SERPINB3;ACTN1	pyrophosphatase activity	120	0.00158306	DHX16;DDX50;EIF5;MYH14;CCNH;HSPA9;ARF1;EIF4A1;RAB9B;DYNLRB2;PCYOX1;PSMD6;NUDT16L1;ATP6V1H;ARF5;KATNAL1;ENTPD7;DDX53;MCM6;RFC5;HSPD1;DICER1;HRAS;RRAS;SNRNP200;ERCC2;PEX1;NAV2;TUBB;ATP10A;NUDT22;EEF2;TDRD9;ABCB9;ATP6V0A2;HLTF;TOP2A;MTG1;TNNT1;RRAS2;ARF6;RAB26;RAB2A;GPN1;KIF5C;RAB36;KIF18A;NUDT15;KIF24;HSPA8;DDX5;RAD17;ENTPD8;RASA1;ABCC12;DYNLL1;ATP6V0B;DHX30;ARL8B;TUBB4B;TAPBP;IDE;ATP13A1;MFN2;GINS…	negative regulation of glycolytic process	1	0.0355151	FBP1	defense response to other organism	78	2.48257e-05	CLEC4D;APOBEC1;NLRP9;NLRC4;LYZL2;S100A12;REG3G;ZNF175;PRG2;AICDA;IRF8;DMBT1;FGA;TLR2;PGLYRP3;LCE3A;MICB;NLRP10;LYZL6;DEFA5;LPO;LYZL1;DEFB125;SYT11;DEFB123;KRT6A;AIM2;DEFA1;DEFA4;RNASE2;S100A9;LILRB1;S100A8;LSM14A;FCN2;TRIM15;DEFB127;HRG;RNASE3;IGLL5;DEFB115;DDX58;DEFA6;HRAS;CLEC4E;AIMP1;FGB;DEFB128;IRGM;NR1H4;PGLYRP4;DEFB116;DEFB118;IFNA14;LALBA;MPO;LCE3C;RPL30;IFI16;LYPD8;BPIFA1;POLR3A;DEFB135;D…	cyclosporin A binding	10	0.000472625	PPIA;PPIL2;PPIC;PPIL6;PPIF;RANBP2;PPIH;PPID;PPIG;PPIL1	Valproic Acid	9	0.0002419	CYP2C8;SCN4A;CYP2B6;UGT2B15;SCN5A;SCN11A;CYP2C9;UGT1A1;CYP2C19
positive regulation of multicellular organismal process	8	0.0387255	JAK2;TRIM58;LURAP1;SERPINB7;ARX;SERPINB3;CD226;TRPC5	interspecies interaction between organisms	111	0.00160239	SCRIB;RBM15B;MAGI3;COPB1;CCNT1;VRK2;IK;CENPU;ARF1;EIF3B;TIRAP;YWHAB;MAPK1;BRD2;RANBP2;EIF4A1;KPNB1;VPS37A;EIF2AK2;RPL30;FKBP8;ATP6V1H;KPNA4;AZI2;HSPD1;KRT6A;PTBP1;BTRC;CCL3;BUB1;MICB;ERCC2;RBCK1;REG3G;P4HB;IL16;REG1B;SLC25A5;PSMA7;BPIFA1;BAD;MXRA8;THOC3;COPS6;TRIM21;TOP2A;GPX1;CUL2;IRF7;ZNF502;PSMB1;SFTPD;CDK9;HTN3;HSPA8;PPIB;DDX5;CDK1;EIF3L;UBXN1;PCBP2;NUP88;DYNLL1;NEDD4;CHMP2A;TUSC2;IDE;CCNK;JU…	keratan sulfate catabolic process	1	0.0355151	FMOD	extracellular matrix	81	2.49493e-05	WNT7A;ENAM;TPSB2;NAV2;APLP1;USH2A;PRG2;ADAMTS10;COL20A1;MXRA5;DMBT1;IL7;ADIPOQ;FGA;COL4A1;MFAP5;COL6A3;CLC;A2M;PRG3;SERPINA1;COL4A2;KRT1;ITIH2;DEFA1;MMP16;FCN1;TPSAB1;MMP28;COL5A1;FGG;ADAMTS2;OC90;ACAN;ITIH1;DCN;COL6A5;S100A9;MMP17;AHSG;EDIL3;LINGO2;S100A8;HAPLN1;CMA1;TINAG;HRG;FGB;PLG;CDH13;PRG4;THBS2;TFIP11;CCDC80;TNN;CTSC;COL22A1;APCS;HSP90B1;PTPRZ1;COL27A1;UCMA;CRELD1;NCAM1;FGF10;COL8A1;HMCN1…	protein kinase binding	116	0.000474696	HINT1;ANGPT2;TIRAP;VRK2;PARD6G;NEK9;TOM1L1;SOX9;HNRNPA0;SPDYA;ATP1B1;FOXO3;CHEK2;CCNYL1;HSP90AA1;SQSTM1;PLCG1;AURKA;TGFBR2;EPHA4;ARHGAP33;GHR;EIF3A;FAM83H;CAMK2N1;IBTK;ADIPOR1;ACTA2;CDK5R1;NCK1;CBLC;SMAD1;YWHAG;AVPR1B;YWHAZ;GSK3B;JTB;RHOJ;CCNY;CDKN2C;STX17;ATP1A1;CAV2;RPS7;PTPN23;VDAC1;IQGAP1;IL31RA;MAP3K5;CNTLN;WAS;ELMO2;PPM1D;GLRX3;TMEM173;PPP1R9A;CEACAM1;BAD;HDAC7;ATG13;CRK;MEF2A;PRKAG2;PARN;C…	troponin complex	4	0.000242201	TNNC1;TNNI2;TNNI1;TNNT3
Systemic lupus erythematosus	2	0.0394209	ACTN1;HIST1H2AE	mitotic cell cycle checkpoint	30	0.00160693	IK;CNOT6;ORC1;TTK;NAE1;HRAS;PIDD1;PLAGL1;BUB1;GEN1;ZNF207;CLSPN;PSMG2;TOP2A;MAD2L1;CDK1;RAD17;WEE1;CHEK2;NABP2;PCNA;CCND1;CNOT1;EME2;CDK5RAP3;MAD2L2;CDKN1B;HMGA2;MSH2;MAD2L1BP	regulation of phospholipase A2 activity	1	0.0355151	ANXA8L1	cell killing	34	2.5106e-05	S100A12;REG3G;SLAMF6;PGLYRP3;LCE3A;MICB;DEFA5;CLEC12B;FCGR2B;KRT6A;DEFA1;DEFA4;IL21;IL18RAP;CD1A;LILRB1;HLA-F;CD1C;HRG;CRTAM;NCR1;DEFA6;DEFB128;KIR3DL1;PGLYRP4;DEFB118;LCE3C;CD1D;RPL30;CD1B;CTSC;CCL13;CD1E;CTSG	heparan sulfate proteoglycan metabolic process	12	0.000475278	HS2ST1;GLCE;XYLT2;EXTL3;HS6ST3;EXT2;SULF1;HPSE;HS6ST1;PXYLP1;TCF7L2;HS3ST3B1	Carbinoxamine	4	0.000242201	CYP2C8;CYP2B6;CYP2C9;CYP2C19
cofactor metabolic process	4	0.0394438	ACOT2;GSTA1;HBZ;GSTM5	viral process	98	0.00169865	SCRIB;RBM15B;MAGI3;COPB1;CCNT1;VRK2;IK;CENPU;ARF1;EIF3B;YWHAB;MAPK1;BRD2;RANBP2;EIF4A1;KPNB1;VPS37A;EIF2AK2;FKBP8;ATP6V1H;KPNA4;AZI2;HSPD1;PTBP1;BTRC;CCL3;BUB1;MICB;ERCC2;RBCK1;P4HB;IL16;SLC25A5;PSMA7;BAD;MXRA8;COPS6;TRIM21;TOP2A;CUL2;IRF7;ZNF502;PSMB1;CDK9;HSPA8;PPIB;DDX5;CDK1;EIF3L;UBXN1;PCBP2;NUP88;DYNLL1;NEDD4;CHMP2A;IDE;CCNK;JUN;CR2;BTBD17;FCGR2B;RPSA;PCNA;VAPB;KARS;POM121;TRIM31;PSMB6;SRCAP…	saliva secretion	1	0.0355151	KCNN4	keratinocyte differentiation	54	2.52743e-05	LOR;KRT6C;CTSV;TCHH;REG3G;C1orf68;NCOA3;LCE3A;LCE1A;KRT84;LCE2D;KRT1;KRT6A;KRTAP11-1;KRT76;SPRR4;LCE6A;KRT75;SCEL;LCE2C;LCE2B;KRT74;LELP1;LCE4A;SPRR3;KRTAP21-1;IVL;SPRR2D;LCE1B;SPRR2B;KRTAP5-3;KRT6B;KRT73;KRTAP19-8;SPRR1B;ACER1;KRTAP10-11;SPRR2F;PPHLN1;BCL11B;LCE3C;SPRR2E;KRTAP5-4;SPRR2A;KRTAP10-1;KRTAP8-1;SPRR1A;KRT77;KRT71;KRTAP10-9;KRT82;S100A7;KRT38;KRT79	regulation of mitotic nuclear division	41	0.000478886	TOM1L1;BUB1;TTK;ZNF207;AURKA;STAG2;PHIP;CUL9;KIF20B;EPGN;XRCC3;DMRT1;IK;NPM2;PTTG1;GEN1;ANAPC4;CAV2;ATRX;FGF8;EREG;LRP5;CDKN1C;HNRNPU;NIPBL;RAD21;EDN1;MKI67;TGFA;CHMP4B;PKMYT1;FBXW5;AURKAIP1;CDC26;UBE2C;PDCD6IP;CCNE1;BTC;CHMP5;INSR;ANAPC5	Gemfibrozil	4	0.000242201	CYP2C8;CYP2C9;UGT1A1;CYP2C19
muscle cell fate commitment	1	0.0394442	TBX3	peptidase complex	19	0.00169927	PSMF1;PSMD8;PSMD6;HTRA2;PSME2;PSMD9;PSMA7;SEC11C;ZFAND2B;PSMB1;ENY2;TAF6L;IDE;PSMB6;PSMD7;PSMB4;USP22;ATXN7L3;SPCS2	post-embryonic animal morphogenesis	1	0.0355151	BAK1	myosin filament	10	2.85197e-05	MYH14;MYOM2;MYH1;MYOM1;MYH4;MYBPC2;MYH2;MYH13;MYH7;MYH8	ephrin receptor binding	11	0.00048724	EPHA4;EFNA3;CDK5R1;NCK1;EPHA7;SIPA1L1;CRK;ANKS1B;ANKS1A;EFNA2;CBL	Lumacaftor	4	0.000242201	CYP2C8;CYP2B6;CYP2C9;CYP2C19
epithelial cell fate commitment	1	0.0394442	ARX	covalent chromatin modification	69	0.00170589	PCGF5;EZH2;BRMS1L;POLE4;NCOA3;KMT2B;PRDM4;C6orf89;UBE2E1;NTMT1;NIPBL;IWS1;PADI1;KDM5B;JADE1;MEN1;KMT2D;PADI2;ATXN3;PHF2;ZNF451;IGF2;NR1H4;PRKD1;PYGO2;PCGF6;ENY2;PCGF1;GCG;TAF6L;CDK9;APOBEC1;CDK1;CTCF;PWP1;HIST1H1C;RNF8;RNF168;PRDM5;MIER1;MSL1;PRDM6;YEATS2;ZNF304;SRCAP;KMT2E;DMRTC2;COPRS;NOC2L;KANSL2;PRMT8;TAF10;WBP2;TRIP12;RLF;SUPT6H;TAF5L;USP22;TBL1XR1;PHB;ATXN7L3;PADI3;CUL4B;UIMC1;HMGA2;PADI4;S…	regulation of IRE1-mediated unfolded protein response	1	0.0355151	BAK1	Modafinil	6	2.90224e-05	CYP2B6;CYP2C19;ADRA1B;CYP3A4;CYP2C9;SLC6A3	ribose phosphate metabolic process	98	0.00050387	HINT1;ADK;ATIC;COX7C;PRPSAP2;ALDOA;UCKL1;CTPS2;NME4;FIGNL1;PMVK;SLC35B3;NME9;NDUFAF1;ATP1B1;SLC25A1;APRT;SDHC;NDUFS4;P2RX7;PAPSS2;G6PD;NUDT16;ATP6V1B2;AADAT;ENO3;DLAT;ADCY3;MFN1;ENTPD4;NUDT11;PGK1;PPARA;GMPR2;UCK1;ENO2;PDK1;GAPDH;PPCS;PRPS1;ZBTB20;PDE8B;SLC25A12;DLG2;NME1;NDUFB2;NDUFS8;EIF6;PTHLH;LDHC;ACAT1;NDUFS2;SLC26A2;ENO4;BAD;PDE7B;GALK1;PRKAG2;AK4;AK3;SLC25A13;NDUFB4;PPIF;PGAM1;ACOT12;CYC1;…	Cerivastatin	5	0.000254431	CYP2C8;CYP2B6;CYP2C9;UGT1A1;CYP2C19
linoleic acid metabolic process	1	0.0394442	GSTA1	protein folding	36	0.00174462	DNAJA2;ALG12;PFDN6;BAG5;HSPA9;ENGASE;FKBP1A;RANBP2;CHCHD4;HSPD1;SUCO;MOGS;PEX19;P4HB;DNAJB11;HSP90B1;FUT10;DNAJB6;CCT4;TOR2A;HSPA8;PPIB;UBXN1;CCT6A;PTGES3;LMAN1;GNB1;ERP29;PFDN2;CCT7;ST13;GNG2;PPIC;DERL1;PFDN5;TBCE	regulation of mesenchymal cell apoptotic process	1	0.0355151	SOX9	Carbinoxamine	6	2.90224e-05	CYP2C8;CYP2B6;CYP2C19;CYP3A4;CYP2C9;HRH1	enzyme activator activity	98	0.00050387	GDI1;TBC1D25;TBC1D22B;TOM1L1;RGS1;STARD13;SPDYA;ATP1B1;TBC1D10B;ACAP2;PLCB1;ARHGDIB;FAM13A;ARHGAP18;DNAJC24;ARHGAP20;OCRL;PCOLCE;ARHGAP21;BNIP2;ARHGAP33;SRGAP2;DNAJA2;CASP3;NSMAF;ARFGAP2;RAPGEF2;RPS27L;PPP2R5B;TBC1D19;ELMOD1;ARHGAP12;CDK5R1;ARHGAP1;CCS;RABGAP1L;APAF1;TBC1D4;AGFG1;RANBP1;ARHGAP4;ARFGAP3;DDX3X;SIPA1L1;JUN;TBC1D15;ARAP3;DEPDC5;ARHGAP26;ARHGAP11B;ARHGEF6;IQGAP1;CAB39;ARHGAP10;ARHGAP2…	Cisapride	5	0.000254431	CYP2C8;CYP2B6;CYP2C9;CYP2C19;HTR2A
corticosteroid receptor signaling pathway	1	0.0394442	JAK2	mitochondrial respiratory chain complex III	6	0.00177683	UQCRFS1;CYC1;UQCRH;BCS1L;UQCRC2;UQCRC1	disaccharide metabolic process	1	0.0355151	FBP1	RAGE receptor binding	7	2.92097e-05	S100A12;FPR1;HMGB1;S100A9;S100A8;S100A13;S100A7	regulation of phosphate metabolic process	277	0.000521224	SMYD3;IGBP1;FKBP1A;EIF2AK2;PPP2R1B;FKBP8;MAP3K8;TIRAP;AGT;FZD8;PWP1;VRK2;APIP;COX11;IL1F10;TOM1L1;SOX9;TIPRL;TTK;SPDYA;MIDN;IFNK;MAGED1;ADAR;CHEK2;MMD;PLCB1;GPATCH2;FMR1;EPHB4;CCNYL1;NDUFS4;PRKD1;P2RX7;HSP90AA1;SQSTM1;PLCL1;PPP2R3A;FARP1;DDRGK1;MTMR1;ITCH;DDR2;STYX;IMPACT;NCAPG2;NPTN;ACVR1;ADNP;TGFBR2;TNFRSF19;EPHA4;PHIP;GHR;BST1;CASP3;EIF3A;CCNH;PPARA;CAPRIN2;NNT;DYNLL1;GBA;RAPGEF2;CAMK2N1;SORL1…	Paroxetine	5	0.000254431	SLC6A2;CYP2C8;CYP2B6;CYP2C9;HTR2A
dosage compensation by inactivation of X chromosome	1	0.0394442	SMCHD1	respiratory chain complex III	6	0.00177683	UQCRFS1;CYC1;UQCRH;BCS1L;UQCRC2;UQCRC1	detection of mechanical stimulus involved in sensory perception of pain	1	0.0355151	ITGA2	Perphenazine	7	2.92097e-05	CYP2C8;CYP2B6;CYP2C19;CYP2C18;CYP3A4;CYP2C9;CALM1	ligase activity	36	0.000521557	CTPS2;TTL;TRIM25;LARS2;TTLL7;DARS;ITCH;ASNS;CARS;RTCB;NAE1;PCCB;KARS;RTCA;MDM2;PPCS;FPGS;UBA6;SLC27A1;EARS2;ACAT1;IARS;NAPRT;SARS;GLUL;TTLL11;MTHFD1L;SLC27A6;ADSS;TPGS1;ASS1;BTRC;SUCLG1;ACSM5;RIMKLA;ARPC4-TTLL3	defense response to Gram-negative bacterium	12	0.000278727	DEFB4B;DEFB104A;IRGM;LCE3A;DEFB107A;DEFA5;DMBT1;DEFB106A;DEFB128;LALBA;NLRP10;LYZL2
positive regulation of mitochondrial translation	1	0.0394442	FASTKD2	maturation of SSU-rRNA from tricistronic rRNA transcript (SSU-rRNA, 5.8S rRNA, LSU-rRNA)	10	0.00178411	HEATR1;BTRC;RPS8;RPS14;TBL3;ABT1;RPSA;NGDN;UTP3;RPS16	mitotic nuclear envelope disassembly	1	0.0355151	NEK9	inorganic ion transmembrane transport	120	3.25677e-05	KCNE1;COX8C;SCN8A;FGF2;GRIN2B;KCNQ2;KCNA1;KCNQ3;HTR2A;CCL3;SCN11A;SLC8A3;CACNG3;GABRR2;BEST2;KCNB2;DPP10;GRIN2A;KCNH1;SCN5A;KCNK18;PMPCA;TRPC4;ATP2B2;COX7B2;GLRA1;CACNG2;PHB;GABRB1;KCNT1;SCN10A;FAM155A;NALCN;GABRE;ANO2;TRDN;OPRM1;KCNK9;SLC24A1;RYR1;OTOP1;ANK2;GABRB3;GABRP;CACNA2D4;GLRA3;PLCG2;KCNT2;TRPC7;TRPC3;SLC24A5;KCNG2;BDKRB1;CACNA1A;ATP6V1H;KCNN1;SLC25A30;PKD2L1;RYR3;SLC11A2;TRPM2;DPP6;FGF1…	organophosphate biosynthetic process	120	0.000525459	ADK;ATIC;PRPSAP2;ALDOA;UCKL1;CTPS2;NME4;HDDC2;CDADC1;PMVK;SLC35B3;NME9;ETNPPL;SLC25A1;STARD7;APRT;ETNK1;DCTD;P2RX7;PAPSS2;MTMR1;G6PD;OCRL;HEXB;ENO3;DLAT;DHDDS;ADCY3;PGK1;PPARA;PNP;PLEKHA1;MTHFD2L;UCK1;ENO2;PDK1;DPM1;ITPKB;KARS;TK2;PCTP;AK7;MPPE1;GAPDH;PPCS;RRM1;RNLS;PRPS1;ZBTB20;MBOAT7;CPNE1;SLC25A12;NME1;SLC27A1;INPP4B;EIF6;FITM1;FGF20;CDIPT;FIG4;PI4K2A;SPTLC1;LDHC;CDS2;ACAT1;SLC26A2;CEPT1;SRD5A…	Dextromethorphan	7	0.000290866	SLC6A2;CYP2C8;CYP2B6;OPRM1;NCF2;CYP2C9;CYP2C19
interleukin-6-mediated signaling pathway	1	0.0394442	JAK2	mRNA binding	39	0.00181266	DHFR;HNRNPA0;HNRNPU;EIF4A1;RPS7;NCL;EIF4G2;RBM5;SRSF3;RPS3A;ANGEL2;GNL3;HNRNPAB;RBM3;RPL35;NUDT21;RPS14;SHMT1;HNRNPC;SAMD4A;CRYZ;RPS3;TSN;RBFOX3;APOBEC1;KHSRP;DDX5;ARC;HNRNPA3;LUC7L;RBM15;RPS2;EIF3A;SF3B1;PUM2;METTL14;RBM25;JRK;NUP98	substrate-independent telencephalic tangential migration	1	0.0355151	ARX	Pentobarbital	12	3.25687e-05	GRIN2B;CYP2C19;GRIN2A;GABRB1;GABRE;GABRB3;GABRP;CHRNA4;GABRQ;GRIN3B;CYP3A4;GABRA3	ubiquitin-like protein ligase activity	47	0.000541821	MED31;XIAP;RNF217;RNF139;TRIM25;RNF103;ITCH;NEDD4;PPIL2;MKRN1;CHFR;RNF150;FBXL12;RNF4;CBLC;UBE2K;MDM2;MED10;SH3RF3;UHRF1;UBR2;ZNRF3;VHL;HUWE1;FBXW11;ANKIB1;TRAIP;TRIM11;TRIM2;HLTF;MYLIP;MDM4;RNF144B;RNF138;MSL2;PJA1;BIRC2;ZNRF2;FBXO4;FANCL;BTRC;ANAPC5;UBE3A;MED27;CBL;RNF7;ARIH1	Pethidine	6	0.000319431	GRIN2B;SLC6A2;GRIN2A;CYP2B6;OPRM1;CYP2C19
pseudopodium	1	0.0394442	ACTN1	negative regulation of cell cycle	80	0.0018172	SCRIB;IK;ATRIP;CNOT6;EIF4G2;ORC1;PHC3;EZH2;TTK;AURKAIP1;NAE1;ANGEL2;HTRA2;HRAS;PIDD1;PLAGL1;TIPRL;BUB1;GEN1;NSUN2;PRKAB1;ZNF207;TMEM67;CLSPN;JADE1;PSMG2;MEN1;TOP2A;CDK2AP2;CUL2;RNF167;USP47;APAF1;PCGF6;MAD2L1;SDE2;CDK9;CDK1;TBRG1;RAD17;WEE1;CHEK2;MAPK14;CDKN2C;CHMP2A;CCNK;NABP2;MFN2;DDIT3;CDC123;PCNA;CCND1;MLST8;GAS7;PRR11;KMT2E;CNOT1;FBXO5;EME2;CDK5RAP3;BABAM1;H2AFX;MAD2L2;PTTG1;CDKN3;CAB39;NPM1…	substrate-independent telencephalic tangential interneuron migration	1	0.0355151	ARX	Propofol	13	3.65313e-05	CYP2C8;CYP2B6;CYP2C19;GABRB1;GABRE;GABRB3;GABRP;CYP2C18;GABRQ;CYP3A4;CYP2C9;GABRA3;SCN4A	regulation of phosphorus metabolic process	277	0.000561535	SMYD3;IGBP1;FKBP1A;EIF2AK2;PPP2R1B;FKBP8;MAP3K8;TIRAP;AGT;FZD8;PWP1;VRK2;APIP;COX11;IL1F10;TOM1L1;SOX9;TIPRL;TTK;SPDYA;MIDN;IFNK;MAGED1;ADAR;CHEK2;MMD;PLCB1;GPATCH2;FMR1;EPHB4;CCNYL1;NDUFS4;PRKD1;P2RX7;HSP90AA1;SQSTM1;PLCL1;PPP2R3A;FARP1;DDRGK1;MTMR1;ITCH;DDR2;STYX;IMPACT;NCAPG2;NPTN;ACVR1;ADNP;TGFBR2;TNFRSF19;EPHA4;PHIP;GHR;BST1;CASP3;EIF3A;CCNH;PPARA;CAPRIN2;NNT;DYNLL1;GBA;RAPGEF2;CAMK2N1;SORL1…	Lamotrigine	8	0.00033654	GABRE;GABRB1;DRD5;GABRA6;GABRA4;GABRP;UGT1A1;HTR2A
acyl-CoA hydrolase activity	1	0.0394442	ACOT2	ubiquitin-dependent ERAD pathway	16	0.00182429	SYVN1;JKAMP;DNAJB9;TMEM67;FOXRED2;HSP90B1;USP19;ERLIN1;OS9;MAN1B1;BAG6;ANKZF1;UBXN4;SEC13;DERL1;RNF103	imidazole-containing compound metabolic process	1	0.0355151	HNMT	humoral immune response	46	3.76973e-05	REG1B;S100A12;REG3G;COL20A1;DMBT1;IL7;FGA;MS4A1;PGLYRP3;A2M;VSIG4;DEFA5;FCGR2B;PHB;KRT1;KRT6A;DEFA1;FCN1;DEFA4;RNASE2;S100A9;S100A8;FCN2;DEFB127;HRG;RNASE3;CCL2;IGLL5;DEFA6;FGB;PGLYRP4;DEFB118;IFNA14;RPL30;CCL13;APCS;BPIFA1;MMP7;PRTN3;S100A7;CFHR1;IFNA4;C5AR1;MASP1;CTSG;COLEC10	nucleoside salvage	8	0.000563009	ADK;UCKL1;APRT;UCK1;TK2;TK1;CDA;UPP1	transmission of nerve impulse	11	0.000338554	TNR;KCNA1;SCN4A;NTRK3;DRD5;CACNG2;GLRA1;P2RX3;CACNG3;SCN5A;SCN11A
histone kinase activity	1	0.0394442	JAK2	symbiont process	105	0.0018681	SCRIB;RBM15B;MAGI3;COPB1;CCNT1;VRK2;IK;CENPU;ARF1;EIF3B;TIRAP;YWHAB;MAPK1;BRD2;RANBP2;EIF4A1;KPNB1;VPS37A;EIF2AK2;FKBP8;ATP6V1H;KPNA4;AZI2;HSPD1;KRT6A;PTBP1;BTRC;CCL3;BUB1;MICB;ERCC2;RBCK1;P4HB;IL16;SLC25A5;PSMA7;BPIFA1;BAD;MXRA8;THOC3;COPS6;TRIM21;TOP2A;GPX1;CUL2;IRF7;ZNF502;PSMB1;SFTPD;CDK9;HSPA8;PPIB;DDX5;CDK1;EIF3L;UBXN1;PCBP2;NUP88;DYNLL1;NEDD4;CHMP2A;TUSC2;IDE;CCNK;JUN;CR2;BTBD17;FCGR2B;RPS…	neural crest formation	1	0.0355151	SOX9	Ketoconazole	11	3.96726e-05	CYP2C8;CYP2B6;CYP2C19;CYP11B1;CYP3A4;CYP2C9;ABCB11;CYP11A1;CYP21A2;NR1I3;CYP19A1	small GTPase mediated signal transduction	103	0.000566724	EPS8;GDI1;RALGDS;PSD4;STAMBP;STARD13;GNB1;ARFGEF2;CYTH3;ARHGDIB;FAM13A;DOCK10;ARHGAP18;MFN2;PRKD1;SQSTM1;FARP1;DOCK5;ARHGAP20;LPAR6;OCRL;ARHGAP21;RAB2A;RAB36;ARHGAP33;SRGAP2;RAPGEF4;RAPGEF2;ARHGAP12;ITPKB;ARHGAP1;SYNPO2L;RIT1;ARF6;ARHGAP4;RAB3B;WASF2;RHOJ;RAP1A;RUNDC3A;SIPA1L1;CDC42SE2;JUN;FGD3;HEG1;RAP1B;RAB1A;RELN;ARAP3;AMOT;ARHGAP26;F2RL3;MET;ARHGAP11B;ARHGEF6;RIT2;FRMD7;RAB34;ARHGEF18;FARP2;A…	chemokine receptor binding	10	0.000349065	DEFB4B;S100A14;CCL13;CCL27;CCL2;DEFB106A;CCL7;CCL1;CCL4L1;CCL11
cell proliferation	9	0.0400033	IFT74;JAK2;BAK1;SERPINB7;ARX;TBX3;SERPINB3;HIST1H2AE;TRPC5	Cell cycle	24	0.00191423	CCNH;YWHAB;GSK3B;ORC1;TTK;MCM6;BUB1;YWHAZ;YWHAG;MAD2L1;CDC16;CDK1;WEE1;CHEK2;CDKN2C;CDC26;ANAPC4;PCNA;YWHAH;CCND1;DBF4;MAD2L2;PTTG1;CDKN1B	regulation of nuclear-transcribed mRNA poly(A) tail shortening	1	0.0355151	BTG2	cellular divalent inorganic cation homeostasis	77	4.3733e-05	FGF2;GRIN2B;HTR2A;FPR1;CCL3;GRINA;SLC8A3;CXCR1;GRIN2A;ADRA1B;PRKCB;TRPC4;ATP2B2;CMKLR1;ADCYAP1R1;HCRTR2;FPR3;CSRP3;SYPL2;GPR32;PDE6B;FAM155A;HMGB1;TRDN;CCL7;SLC24A1;RYR1;AP3D1;NMUR2;ANK2;CCL8;ADCY8;CCL11;PLCG2;CCKBR;S100A9;TRPC7;TRPC3;SLC24A5;BDKRB1;ATP13A5;CACNA1A;S100A8;XCR1;TMEM64;RYR3;TRPM2;GNA15;TRPC6;DHRS7C;GPR4;BDKRB2;CCL1;METTL21C;CCL13;HSP90B1;UBASH3B;CNR1;CX3CR1;SLC39A6;CEMIP;KNG1;PLCZ1…	ribonucleoside triphosphate biosynthetic process	32	0.000576996	ALDOA;UCKL1;CTPS2;NME4;NME9;P2RX7;ENO3;PGK1;PPARA;UCK1;ENO2;GAPDH;ZBTB20;SLC25A12;NME1;EIF6;LDHC;ENO4;GALK1;PRKAG2;SLC25A13;PGAM1;CYC1;ADPGK;HDAC4;PFKFB1;FBP1;PID1;ENO1;DNAJC30;INSR;ECD	Bromazepam	6	0.00041591	GABRE;GABRB1;GABRA6;GABRA4;GABRP;CYP2C19
membrane region	3	0.0409451	JAK2;CD226;TRPC5	regulation of deoxyribonuclease activity	5	0.00192321	RPS3;HMGB1;PCNA;DDX11;NPM1	positive regulation of nuclear-transcribed mRNA poly(A) tail shortening	1	0.0355151	BTG2	modification of morphology or physiology of other organism	33	4.70295e-05	REG1B;SCRIB;S100A12;REG3G;CCNT1;CCL4L1;CCL3;PGLYRP3;LCE3A;DEFA5;KRT6A;DEFA1;DEFA4;S100A9;HRG;DEFA6;CLEC4M;NTRK3;DEFB128;PGLYRP4;PLG;DEFB118;LCE3C;RPL30;CCL13;APCS;HMGA2;HSPA8;CCNK;PPIB;TGFB1;CALM1;CTSG	DNA-templated transcription, initiation	50	0.000586764	MED31;ERCC2;UBTF;SOX9;TAF6L;CBFB;NCOA6;E2F3;DR1;TAF10;PAXIP1;THRB;CCNH;PPARA;ERCC3;THRA;POLR2L;PPARG;MED10;NR1I2;JUN;GTF2H1;CD3EAP;SUB1;POLR2C;PPM1D;MAPK3;BAX;ESR2;TAF4;CDKN1A;NR4A2;CREB1;MED13;NR3C1;CTNNBIP1;CDK9;NR2C1;POLR2I;NRBP1;CAND1;MAML1;MED17;POLR3H;MED27;POLR2D;NR1H3;NR1D2;RUNX2;TP53	Methimazole	4	0.000420503	CYP2B6;TPO;CYP2C9;CYP2C19
thymocyte apoptotic process	1	0.0417165	BAK1	sphingosine biosynthetic process	5	0.00192321	GBA;SPTLC2;ACER1;SPTLC1;SPHK2	npBAF complex	1	0.0355151	SS18	Lidocaine	9	4.84031e-05	CYP2C8;CYP2B6;SCN5A;SCN10A;CYP2C18;CYP3A4;CYP2C9;SCN4A;SCN9A	negative regulation of cell cycle	104	0.000594118	JADE1;NSUN2;TOM1L1;TERF2;BUB1;TIPRL;ANGEL2;TTK;SOX4;CNOT10;ZNF207;WEE1;CHEK2;USP47;MFN2;RBBP4;H2AFX;DDIT3;GAS1;AURKA;STAG2;CNOT6;ZWINT;CASP3;NABP1;RBM14-RBM4;NAE1;RPS27L;GTSE1;CHFR;CAMK2N1;KIF20B;PPP2R5B;CLSPN;CDK5R1;APAF1;MDM2;XRCC3;RAD9B;APBB1;DMRT1;CDC123;INHA;IK;CDKN2C;INCA1;PTTG1;GEN1;ATRX;TERF1;CAB39;PKD2;BCL6;JMY;BARD1;BAX;PRKAG2;DCLRE1B;CDKN1A;PTPRK;MYOCD;MSH6;CDKN1C;MDM4;RINT1;MDM1;RAD21…	Seratrodast	4	0.000420503	CYP2C8;CYP2B6;CYP2C9;CYP2C19
[truncated: 748 more rows]

## Sheet: DAVID
Supplementary Table 6C. DAVID enrichment analysis of DNA methylation for White,Black and Asian PCa patients.
Asian VS Black								Asian VS White								Black VS White
Black				Asian				White				Asian				White				Black
Term	Count	PValue	Genes	Term	Count	PValue	Genes	Term	Count	PValue	Genes	Term	Count	PValue	Genes	Term	Count	PValue	Genes	Term	Count	PValue	Genes
[truncated: 399 more rows]

## Sheet: Methylation drives genes
Supplementary Table 6D. Webgestalt enrichment analysis of protein coding DNA methylation drives genes for White,Black and Asian PCa patients.
Asian VS Black					Asian VS White					Black VS White
[truncated: 212 more rows]

## Sheet: Methylation drives genes2
Supplementary Table 6E. Enrichment analysis of non-protein coding DNA methylation drives gene MIR155HG which significant in White/Black PCa patients when compared to Asian PCa patients.
[truncated: 1,002 more rows]
