# Supplementary material for: Comprehensive signature analysis of drug metabolism differences in the White, Black and Asian prostate cancer patients
Source: Aging (Albany NY). 2021 Jun 18;13(12):16316–40. doi: 10.18632/aging.203158 (PMC8266326; doi:10.18632/aging.203158)
Supplement: Supplementary Table 7 [file aging-13-203158-s008.xlsx]

## Sheet: GSEA
Supplementary Table 7A. GSEA enrichment analysis of mutations for White, Black and Asian PCa patients.
Asian VS Black								Asian VS White								Black VS White
Black				Asian				White				Asian				White				Black
GS<br> follow link to MSigDB	SIZE	NOM p-val	FDR q-val	GS<br> follow link to MSigDB	SIZE	NOM p-val	FDR q-val	GS<br> follow link to MSigDB	SIZE	NOM p-val	FDR q-val	GS<br> follow link to MSigDB	SIZE	NOM p-val	FDR q-val	GS<br> follow link to MSigDB	SIZE	NOM p-val	FDR q-val	GS<br> follow link to MSigDB	SIZE	NOM p-val	FDR q-val
suzuki response to tsa and decitabine 1b	2	0.0280172	1	reactome relaxin receptors	1	0	1	biocarta akap95 pathway	7	0	1	reactome regulation of gene expression in endocrine committed neurog3plus progenitor cells	3	0.0464602	1	kang doxorubicin resistance up	35	0.0115385	0.272647	varela zmpste24 targets dn	21	0.0131004	1
scheidereit ikk interacting proteins	9	0.00607287	1	soucek myc targets	1	0.0321285	1	reactome receptor mediated mitophagy	5	0.0111359	1					reactome activated pkn1 stimulates transcription of ar androgen receptor regulated genes klk2 and klk3	31	0.015748	0.271908	korkola seminoma dn	9	0	0.933809
figueroa aml methylation cluster 1 dn	4	0.00215054	1	ray alzheimers disease	1	0.0321285	1	mikkelsen npc icp with h3k27me3	8	0.019084	1					creighton endocrine therapy resistance 2	243	0.0181452	0.264556	biocarta il17 pathway	11	0.00208768	0.631965
smith tert targets up	16	0	1	ongusaha brca1 targets dn	1	0.0321285	1	thum mir21 targets heart disease dn	7	0.0120724	1					bilanges rapamycin sensitive via tsc1 and tsc2	31	0.010352	0.321926	korkola embryonal carcinoma dn	10	0.00206612	0.537721
woo liver cancer recurrence dn	6	0.0429448	1	park osteoblast differentiation by phenylamil dn	1	0.0321285	1	reactome mitophagy	10	0.0495868	1					keshelava multiple drug resistance	34	0.0325866	0.439421	ono aml1 targets up	18	0.0161616	0.708844
valk aml cluster 9	7	0.0197239	1	finetti breast cancers kinome gray	1	0.0263692	1	reactome pink parkin mediated mitophagy	7	0.043299	1					graessmann response to mc and doxorubicin dn	397	0.0141988	0.491519	korkola choriocarcinoma dn	9	0	0.632038
kegg asthma	3	0.0300601	1	reactome keratan sulfate degradation	1	0.0222635	1	reactome negative feedback regulation of mapk pathway	3	0.00211864	1					reactome reproduction	90	0.00380952	0.290985	lee liver cancer hepatoblast	7	0.00404858	0.632898
dacosta ercc3 allele xpcs vs ttd up	4	0.0263692	1	biocarta slrp pathway	1	0.0222635	1	reactome e2f enabled inhibition of pre replication complex formation	6	0.00412371	1					acevedo liver cancer with h3k9me3 dn	65	0.00379507	0.397985	kegg intestinal immune network for iga production	21	0.0132159	0.756502
reactome transport of bile salts and organic acids metal ions and amine compounds	12	0.0448343	1	reactome defective chst6 causes mcdc1	1	0.0222635	1	meinhold ovarian cancer low grade up	7	0.043299	1					gho atf5 targets dn	10	0	0.360845	nakajima mast cell	28	0.0234834	0.769447
zhan late differentiation genes dn	3	0.00574713	1	reactome defective st3gal3 causes mct12 and eiee15	1	0.0222635	1	reactome hdl assembly	6	0.0492701	1					reactome meiosis	68	0.00561798	0.31813	reactome wnt ligand biogenesis and trafficking	15	0.0188679	0.75165
schuetz breast cancer ductal invasive dn	11	0.0474308	1	reactome defective b4galt1 causes b4galt1 cdg cdg 2d	1	0.0222635	1	reactome condensation of prometaphase chromosomes	8	0.038	1					reactome meiotic recombination	43	0.0150376	0.387302	uzonyi response to leukotriene and thrombin	19	0.0201207	0.746167
figueroa aml methylation cluster 6 up	16	0.031185	1	mootha pyr	1	0.023301	1	biocarta akapcentrosome pathway	12	0.0385356	1					graham normal quiescent vs normal dividing dn	53	0.00766283	0.382871	reactome naplus cl dependent neurotransmitter transporters	17	0.0100806	0.770369
maloney response to 17aag dn	5	0.0390144	1					biocarta mal pathway	11	0.0210325	1					reactome transcriptional regulation of granulopoiesis	45	0.0056926	0.33475	onder cdh1 targets 3 dn	36	0.0427699	0.781318
croonquist il6 deprivation up	2	0.00646552	1					moreaux b lymphocyte maturation by taci dn	38	0.0286299	1					zhou cell cycle genes in ir response 24hr	73	0.0138614	0.367615	reactome activation of matrix metalloproteinases	16	0.0155211	0.780908
chiaretti t all relapse prognosis	2	0.00407332	1					reactome pka mediated phosphorylation of key metabolic factors	4	0.0358491	1					graham cml dividing vs normal quiescent up	105	0.0151515	0.374455	kegg allograft rejection	19	0.0122951	0.772896
biocarta agr pathway	4	0.0404858	1					reactome beta catenin phosphorylation cascade	11	0.0351967	1					reactome prc2 methylates histones and dna	35	0.0114504	0.347535	murakami uv response 6hr dn	14	0.00209205	0.750769
lindstedt dendritic cell maturation d	10	0.0474308	1					reactome phosphorylation site mutants of ctnnb1 are not targeted to the proteasome by the destruction complex	11	0.0351967	1					odonnell tfrc targets dn	80	0.0114286	0.31797	yih response to arsenite c5	6	0.0147368	0.797968
croonquist nras signaling up	4	0.0450098	1					reactome golgi cisternae pericentriolar stack reorganization	6	0.018	1					reactome rho gtpases activate pkns	47	0.00967118	0.303158	chang immortalized by hpv31 dn	35	0.0020284	0.807933
reactome negative regulation of mapk pathway	7	0.022449	1					reactome mitotic prometaphase	129	0.0313725	1					reactome copi dependent golgi to er retrograde traffic	67	0.00798403	0.294766	lee aging muscle up	14	0.0382979	0.811775
jackson dnmt1 targets dn	2	0.0226804	1					biocarta ptdins pathway	19	0.0336634	1					whiteford pediatric cancer markers	66	0.0174419	0.284505	biocarta stem pathway	9	0.0196078	0.78541
reactome fcgr activation	2	0.00779727	1					holleman prednisolone resistance all up	9	0.0311203	1					sotiriou breast cancer grade 1 vs 3 up	93	0.019305	0.28743	setlur prostate cancer tmprss2 erg fusion dn	13	0.0202429	0.748154
jazaeri breast cancer brca1 vs brca2 dn	5	0.0201613	1					reactome assembly of the orc complex at the origin of replication	4	0.0253906	1					whitfield cell cycle literature	29	0.00952381	0.279031	reactome pi3k events in erbb4 signaling	6	0.0117417	0.722195
yao temporal response to progesterone cluster 5	2	0.015625	1					reactome clec7a inflammasome pathway	5	0.0295983	1					reactome g2 m dna damage checkpoint	50	0.00974659	0.275636	biocarta nkcells pathway	6	0.0266393	0.696483
mccollum geldanamycin resistance up	2	0.039604	1					ding lung cancer mutated frequently	11	0.0389105	1					burton adipogenesis peak at 24hr	26	0.0132576	0.296102	wang nfkb targets	15	0.0419426	0.695632
hoshida liver cancer subclass s2	16	0.0277778	1					slebos head and neck cancer with hpv up	41	0.0277228	1					gavin foxp3 targets cluster p6	58	0.0114068	0.28418	huper breast basal vs luminal dn	31	0.0323887	0.666914
zwang egf persistently dn	6	0.0251046	1					heidenblad amplicon 12p11 12 dn	10	0.0391389	1					reactome hdacs deacetylate histones	45	0.0232558	0.287401	bacolod resistance to alkylating agents up	15	0.018595	0.651634
reactome phase 3 rapid repolarisation	3	0.0466926	1					boylan multiple myeloma c cluster up	22	0.0159363	1					nikolsky breast cancer 8p12 p11 amplicon	15	0	0.279172	reactome peptide hormone biosynthesis	6	0.0193798	0.628961
reactome prc2 methylates histones and dna	2	0.0440252	1					fardin hypoxia 9	6	0.0260304	1					concannon apoptosis by epoxomicin dn	95	0.0136452	0.272236	wang neoplastic transformation by ccnd1 myc	12	0.0398323	0.661287
reactome dna methylation	2	0.0440252	1					reactome vitamin b5 pantothenate metabolism	11	0.0428571	1					florio neocortex basal radial glia dn	123	0.0206767	0.26936	reactome negative regulation of tcf dependent signaling by wnt ligand antagonists	12	0.0234375	0.659501
biocarta sppa pathway	2	0.0489796	1					bystrykh hematopoiesis stem cell fgf3	3	0.0400763	1					tang senescence tp53 targets dn	34	0.0251938	0.267421	shin b cell lymphoma cluster 9	12	0.0174673	0.642284
reactome rna polymerase ii transcription pre initiation and promoter opening	4	0.0125	1					reactome tp53 regulates transcription of dna repair genes	38	0.0203666	1					reactome nucleosome assembly	32	0.0210325	0.262971	sasai targets of cxcr6 and ptch1 up	9	0.0239651	0.637011
biocarta dsp pathway	2	0.043659	1					reactome tgf beta receptor signaling in emt epithelial to mesenchymal transition	10	0.0430328	1					reactome meiotic synapsis	46	0.0192308	0.260622	minguez liver cancer vascular invasion dn	16	0.0443548	0.619991
galindo immune response to enterotoxin	2	0.0431373	1					reactome recruitment of numa to mitotic centrosomes	65	0.00970874	1					reactome condensation of prophase chromosomes	33	0.0213592	0.255655	johnstone parvb targets 1 up	4	0.0229645	0.591436
reactome dna double strand break response	6	0.0282258	1					sa fas signaling	6	0.0359408	1					reactome oxidative stress induced senescence	65	0.00580271	0.264656	matzuk luteal genes	5	0.00809717	0.603585
frasor response to estradiol up	2	0.0394477	1					reactome regulation of plk1 activity at g2 m transition	54	0.00601202	1					ishida e2f targets	32	0.0189753	0.258047	reactome eicosanoid ligand binding receptors	9	0.0193424	0.59311
kegg basal transcription factors	3	0.033543	1					reactome centrosome maturation	53	0.0040568	1					reactome rmts methylate histone arginines	42	0.0175097	0.260833	pid alpha synuclein pathway	14	0.0311203	0.591623
hummerich malignant skin tumor dn	2	0.0337302	1					reactome e2f mediated regulation of dna replication	15	0.0354167	1					reactome ercc6 csb and ehmt2 g9a positively regulate rrna expression	37	0.0215686	0.25428	ji carcinogenesis by kras and stk11 up	10	0.0304183	0.562682
reactome alpha linolenic omega3 and linoleic omega6 acid metabolism	2	0.0292793	1					reactome intra golgi traffic	29	0.015625	1					olsson e2f3 targets dn	26	0.0019685	0.254281	wagschal ehmt2 targets up	10	0.0201342	0.532131
reactome synthesis secretion and inactivation of glucose dependent insulinotropic polypeptide gip	2	0.01875	1					soucek myc targets	2	0.0272537	1					yu myc targets up	23	0.0207156	0.251878	maina vhl targets dn	9	0.0232108	0.540148
reactome urea cycle	1	0.0185874	1					biocarta hivnef pathway	33	0.0245399	1					reactome processing of dna double strand break ends	52	0.0114504	0.246821	ono foxp3 targets up	17	0.0329897	0.531024
wikman asbestos lung cancer up	1	0.0441459	1					myllykangas amplification hot spot 22	9	0.0491803	1					odonnell targets of myc and tfrc dn	23	0.0135397	0.253295	reactome interleukin 18 signaling	4	0.00623701	0.521333
visala response to heat shock and aging dn	1	0.0403846	1					reactome rna polymerase ii transcription pre initiation and promoter opening	20	0.0365112	1					farmer breast cancer cluster 2	21	0.0193798	0.246969	hummel burkitts lymphoma dn	9	0.0484848	0.53229
martinelli immature neutrophil dn	1	0.0403846	1					kegg basal transcription factors	14	0.045738	1					kobayashi egfr signaling 24hr dn	143	0.0232558	0.242546	kegg asthma	15	0.0149254	0.512785
biocarta tubby pathway	1	0.0153846	1					biocarta atm pathway	14	0.0365854	1					cui glucose deprivation	38	0	0.242383	kegg taurine and hypotaurine metabolism	7	0.0404255	0.507131
tesar alk targets human es 5d up	1	0	1					reactome synthesis of pi	4	0.0487805	1					reactome lgi adam interactions	11	0.00369004	0.239099	kinney dnmt1 methylation targets	7	0.0373444	0.510141
tesar alk targets episc 4d up	1	0	1					biocarta hswi snf pathway	7	0.0442656	1					reactome dna methylation	30	0.0200803	0.234687	reactome pd 1 signaling	11	0.041841	0.500625
zhou pancreatic endocrine progenitor	1	0	1					reactome aurka activation by tpx2	47	0.020202	1					sharma pilocytic astrocytoma location up	18	0.00772201	0.240194	kobayashi egfr signaling 6hr dn	6	0.0429688	0.494015
terao aox4 targets hg dn	1	0.0439122	1					reactome transcription of the hiv genome	32	0.0272537	1					biocarta dream pathway	7	0.00613497	0.23985	biocarta dc pathway	8	0.0299145	0.485035
reactome linoleic acid la metabolism	1	0.0439122	1					nagy pcaf components human	4	0.037037	1					horiuchi wtap targets dn	175	0.0178571	0.235869	reactome neurotransmitter clearance	7	0.0234375	0.493648
reactome molybdenum cofactor biosynthesis	1	0.0364807	1					elvidge hif1a targets dn	52	0.0345528	1					mori large pre bii lymphocyte up	51	0.0254403	0.235588	korkola yolk sac tumor	39	0.0367347	0.506021
ji carcinogenesis by kras and stk11 up	1	0.0444874	1					reactome rna polymerase ii pre transcription events	39	0.0313808	1					graham cml quiescent vs normal quiescent up	52	0.0228571	0.237157	ramjaun apoptosis by tgfb1 via smad4 up	5	0.0306748	0.499331
pastural riz1 targets dn	1	0.0317797	1					reactome anchoring of the basal body to the plasma membrane	62	0.0379242	1					reactome factors involved in megakaryocyte development and platelet production	113	0.0133843	0.23716	ma myeloid differentiation dn	30	0.048583	0.496842
								holleman asparaginase resistance all dn	16	0.0321888	1					reactome sirt1 negatively regulates rrna expression	29	0.0175439	0.232497	kim glis2 targets dn	3	0.010142	0.504506
								reactome hiv life cycle	78	0.0186335	1					pid aurora b pathway	23	0.0078125	0.23425	biocarta vobesity pathway	3	0.0203666	0.530848
								reactome propionyl coa catabolism	1	0.030303	1					reactome activation of hox genes during differentiation	65	0.017341	0.236556	reactome shc1 events in erbb4 signaling	8	0.0337302	0.504457
																rhodes undifferentiated cancer	40	0.0209524	0.232255	burton adipogenesis 1	17	0.0452756	0.522552
																pid plk1 pathway	30	0.027668	0.230512	reactome fgfr2c ligand binding and activation	5	0.0436681	0.520663
																reactome formation of the beta catenin:tcf transactivating complex	52	0.0254902	0.236499	baus tff2 targets dn	5	0.0454545	0.513434
																winnepenninckx melanoma metastasis up	92	0.012024	0.235111	delaserna targets of myod and smarca4	6	0.0364807	0.507272
																liu prostate cancer up	54	0.00204082	0.238249	matzuk preovulatory follicle	5	0.0491493	0.496201
																lee early t lymphocyte up	63	0.0262664	0.246368	biocarta erbb4 pathway	5	0.0362173	0.524826
																reactome depurination	26	0.031746	0.242809	chassot skin wound	3	0.0396825	0.525687
																reactome rna polymerase i promoter escape	42	0.0374753	0.240515	pid rhodopsin pathway	16	0.014862	0.528971
																zhou cell cycle genes in ir response 6hr	47	0.0316206	0.244322	biocarta asbcell pathway	8	0.0465587	0.512629
																reactome senescence associated secretory phenotype sasp	54	0.0197628	0.244275	reactome leukotriene receptors	3	0.0233463	0.504698
																reactome rho gtpase effectors	195	0.00784314	0.250535	reactome hyaluronan biosynthesis and export	4	0.0421941	0.500722
																reactome mitotic metaphase and anaphase	122	0.0159046	0.256405	chemello soleus vs edl myofibers dn	3	0.042471	0.500564
																reactome resolution of sister chromatid cohesion	83	0.0197628	0.254222	reactome p2y receptors	7	0.024948	0.516126
																zhan multiple myeloma pr up	29	0.0133333	0.250443	smid breast cancer erbb2 dn	3	0.013834	0.516317
																reactome homology directed repair	76	0.0192308	0.258396	reactome regulation of gene expression by hypoxia inducible factor	11	0.038835	0.512373
																hoffmann large to small pre bii lymphocyte up	92	0.0313112	0.257631	iglesias e2f targets dn	7	0.0453649	0.522252
																reactome base excision repair ap site formation	29	0.0316832	0.256932
																reactome pre notch expression and processing	61	0.0252427	0.255911
																wang response to gsk3 inhibitor sb216763 dn	215	0.013834	0.255582
																nakayama soft tissue tumors pca2 up	59	0.0332717	0.262324
																mori immature b lymphocyte dn	55	0.0367505	0.273446
																reactome positive epigenetic regulation of rrna expression	58	0.0311891	0.284112
																le egr2 targets up	58	0.0232558	0.284138
																molenaar targets of ccnd1 and cdk4 dn	26	0.0366089	0.280583
																chemnitz response to prostaglandin e2 up	78	0.0214008	0.282166
																reactome g2 m checkpoints	93	0.00806452	0.278875
																ruiz tnc targets dn	85	0.0433145	0.281107
																reactome pkmts methylate histone lysines	39	0.0139442	0.278052
																reactome cell cycle checkpoints	170	0.0118577	0.276153
																petrova prox1 targets up	13	0.0289575	0.272784
																dutertre estradiol response 24hr up	209	0.0337972	0.270035
																west adrenocortical tumor markers up	11	0.0181818	0.268005
																spira smokers lung cancer up	16	0	0.269207
																reactome gene silencing by rna	75	0.0255906	0.265047
																reactome dna damage telomere stress induced senescence	40	0.0212766	0.262073
																reactome rna polymerase i transcription	56	0.0294695	0.264491
																reactome transcriptional regulation by small rnas	56	0.0292969	0.268194
																su testis	47	0.0205224	0.268568
																reactome nonhomologous end joining nhej	34	0.025641	0.263446
																ehlers aneuploidy dn	6	0.0060241	0.26078
																kauffmann melanoma relapse up	39	0.0325048	0.258477
																reactome m phase	234	0.012	0.260126
																lindgren bladder cancer cluster 3 up	169	0.01	0.258916
																reactome g1 s specific transcription	17	0.0215264	0.263642
																reactome metalloprotease dubs	19	0.00590551	0.261063
																reactome hdms demethylate histones	28	0.00790514	0.260133
																sarrio epithelial mesenchymal transition up	102	0.0139165	0.257821
																benporath proliferation	75	0.0371094	0.257806
																le neuronal differentiation dn	10	0.0235294	0.257272
																croonquist il6 deprivation dn	64	0.0240964	0.256999
																reactome runx1 regulates transcription of genes involved in differentiation of hscs	60	0.0294118	0.256503
																garcia targets of fli1 and dax1 dn	81	0.0257426	0.259585
																biocarta rb pathway	11	0.00400802	0.262349
																honrado breast cancer brca1 vs brca2	7	0.0113636	0.261952
																yu bap1 targets	20	0.0194175	0.260434
																farmer breast cancer cluster 7	13	0.0122951	0.263062
																reactome hats acetylate histones	71	0.0318725	0.267197
																reactome negative epigenetic regulation of rrna expression	55	0.0472441	0.278511
																li wilms tumor vs fetal kidney 1 dn	109	0.0390625	0.276333
																fischer dream targets	568	0.012	0.285092
																acevedo liver cancer with h3k27me3 dn	131	0.0485075	0.283349
																reactome runx1 regulates genes involved in megakaryocyte differentiation and platelet function	55	0.0478927	0.281281
																fischer g2 m cell cycle	149	0.041502	0.279133
																reactome rho gtpases activate formins	88	0.0196078	0.28051
																chuang oxidative stress response dn	6	0.0138067	0.283337
																stein esrra targets responsive to estrogen dn	25	0.00598802	0.290665
																reactome mitotic prophase	76	0.0157171	0.290023
																vantveer breast cancer metastasis dn	72	0.0230769	0.293174
																chiang liver cancer subclass proliferation dn	104	0.0403071	0.292274
																reactome golgi to er retrograde transport	87	0.0200401	0.298784
																vernell retinoblastoma pathway up	52	0.0428016	0.299816
																reactome interaction with cumulus cells and the zona pellucida	11	0.0138067	0.297517
																reactome homologous dna pairing and strand exchange	30	0.0434783	0.299258
																shedden lung cancer poor survival a6	251	0.0197628	0.300141
																reactome cell cycle mitotic	322	0.00992064	0.304174
																mori emu myc lymphoma by onset time up	56	0.00609756	0.305984
																furukawa dusp6 targets pci35 dn	37	0.042471	0.304199
																reactome dna double strand break response	43	0.0235756	0.307891
																ikeda mir30 targets dn	18	0.0464135	0.306291
																manalo hypoxia dn	163	0.022541	0.309728
																reactome mitotic spindle checkpoint	69	0.0257937	0.307633
																reactome cell cycle	391	0.013834	0.307154
																kim tial1 targets	13	0.0243902	0.305353
																reactome kinesins	47	0.0375494	0.304994
																reactome resolution of d loop structures through synthesis dependent strand annealing sdsa	21	0.0446602	0.303988
																reactome base excision repair	42	0.0285171	0.303853
																kannan tp53 targets dn	11	0.044898	0.307833
																croonquist nras signaling dn	46	0.0362903	0.305696
																fujii ybx1 targets dn	120	0.0100806	0.304302
																dang myc targets up	59	0.00409836	0.304793
																reichert mitosis lin9 targets	19	0.0394477	0.30286
																lopez mesotelioma survival time up	6	0.0251451	0.303093
																biocarta plce pathway	5	0.00582524	0.303788
																lastowska coamplified with mycn	27	0.031068	0.307987
																greenbaum e2a targets up	22	0.0195695	0.305326
																marson bound by e2f4 unstimulated	384	0.0180361	0.307902
																biocarta no1 pathway	22	0.0136187	0.307142
																jazag tgfb1 signaling via smad4 up	64	0.0448343	0.306699
																reactome e3 ubiquitin ligases ubiquitinate target proteins	25	0.00402414	0.306444
																nakamura cancer microenvironment dn	27	0.0311891	0.31209
																mori pre bi lymphocyte up	47	0.0473373	0.311788
																kuuselo pancreatic cancer 19q13 amplification	14	0.0346154	0.311854
																biocarta akapcentrosome pathway	12	0.016129	0.311169
																tomlins metastasis dn	6	0.020202	0.310138
																reactome inhibition of the proteolytic activity of apc c required for the onset of anaphase by mitotic spindle checkpoint components	13	0.0200803	0.315558
																biocarta atrbrca pathway	16	0.0177165	0.315032
																heidenblad amplicon 8q24 up	21	0.0160643	0.318517
																biocarta mpr pathway	12	0.0155039	0.320463
																browne hcmv infection 2hr dn	29	0.0195312	0.322708
																mulligan ntf3 signaling via insr and igf1r up	13	0.0123711	0.320809
																basaki ybx1 targets up	172	0.0314342	0.320175
																kegg porphyrin and chlorophyll metabolism	20	0.0392523	0.319091
																biocarta cdc25 pathway	8	0.025	0.318191
																reactome metabolism of nucleotides	57	0.0261044	0.317741
																reactome telomere maintenance	40	0.0386847	0.318682
																iizuka liver cancer progression l0 l1 up	6	0.0344828	0.318956
																montero thyroid cancer poor survival up	8	0.0190114	0.323403
																tomlins prostate cancer up	20	0.00625	0.324764
																xu hgf signaling not via akt1 48hr dn	13	0.0124224	0.327305
																shepard bmyb targets	44	0.0402299	0.326437
																gobert oligodendrocyte differentiation up	341	0.0454545	0.327963
																schlosser myc targets repressed by serum	79	0.00208768	0.326169
																chow rassf1 targets up	15	0.0292398	0.325987
																reactome chromosome maintenance	51	0.0289575	0.326825
																biocarta cftr pathway	5	0.00592885	0.328848
																reactome dna double strand break repair	97	0.0179283	0.328928
																vecchi gastric cancer early up	238	0.0357143	0.326315
																bandres response to carmustin mgmt 48hr up	12	0.0469388	0.331005
																yao temporal response to progesterone cluster 15	24	0.0120724	0.329371
																pujana brca centered network	73	0.0399202	0.331422
																biocarta g2 pathway	18	0.00206186	0.335106
																whitfield cell cycle s	84	0.032	0.346091
																reactome establishment of sister chromatid cohesion	9	0.0283976	0.351434
																reactome mitochondrial fatty acid beta oxidation of saturated fatty acids	6	0.025	0.349988
																biocarta akap13 pathway	7	0.0251938	0.353776
																reactome apc cdc20 mediated degradation of nek2a	15	0.0389344	0.351477
																holleman daunorubicin all up	4	0.012685	0.350347
																finetti breast cancer kinome red	12	0.0471513	0.349657
																reactome signaling by rho gtpases	297	0.0119522	0.34949
																yegnasubramanian prostate cancer	76	0.0341556	0.348694
																reactome intra golgi and retrograde golgi to er traffic	132	0.01222	0.346991
																jeon smad6 targets dn	13	0.0221328	0.347132
																reactome transcription of e2f targets under negative control by dream complex	10	0.0219124	0.346682
																pid dna pk pathway	12	0.0260521	0.347234
																choi atl acute stage	4	0.0351562	0.345952
																kegg glycosaminoglycan biosynthesis chondroitin sulfate	12	0.027668	0.343084
																karakas tgfb1 signaling	13	0.0498084	0.34212
																reactome mitotic prometaphase	134	0.0261044	0.346706
																nikolsky breast cancer 11q12 q14 amplicon	88	0.0473373	0.346211
																bidus metastasis up	116	0.0184426	0.345417
																kegg valine leucine and isoleucine biosynthesis	9	0.0406504	0.357034
																biocarta bcellsurvival pathway	11	0.0271845	0.363543
																landis erbb2 breast preneoplastic up	10	0.0374016	0.366691
																reactome ub specific processing proteases	115	0.00796813	0.365091
																whitfield cell cycle g2	90	0.0469388	0.364552
																murakami uv response 6hr up	18	0.0243902	0.365719
																ohashi aurkb targets	6	0.0332681	0.367432
																nikolsky breast cancer 8q23 q24 amplicon	94	0.0381526	0.36732
																reactome estrogen dependent gene expression	84	0.0199203	0.372188
																biocarta p53 pathway	7	0.027451	0.374292
																pid e2f pathway	55	0.0179283	0.374594
																pid foxm1 pathway	24	0.0398406	0.377179
																thillainadesan znf217 targets up	21	0.0160643	0.378402
																boyault liver cancer subclass g3 up	97	0.0183673	0.37704
																iizuka liver cancer progression l1 g1 dn	6	0.0268595	0.378176
																mori plasma cell up	24	0.0194553	0.379774
																pid myc activ pathway	51	0.0101215	0.381929
																biocarta efp pathway	10	0.00205761	0.379539
																weber methylated icp in fibroblast	16	0.0124334	0.381477
																wilcox response to progesterone up	91	0.0252427	0.385464
																kinsey targets of ewsr1 flii fusion up	699	0.018	0.385118
																kauffmann dna repair genes	152	0.0199601	0.386214
																reactome cellular senescence	106	0.0119522	0.387056
																delpuech foxo3 targets dn	23	0.0345528	0.386923
																biocarta ck1 pathway	9	0.011811	0.386477
																johansson brain cancer early vs late up	6	0.0462107	0.385797
																reichert g1s regulators as pi3k targets	5	0.0194553	0.387559
																biocarta akap95 pathway	8	0.0285714	0.385595
																gazda diamond blackfan anemia progenitor dn	40	0.00412371	0.384484
																maclachlan brca1 targets up	12	0.0359281	0.389454
																fischer g1 s cell cycle	120	0.0318091	0.390755
																frasor response to estradiol up	15	0.0390144	0.393442
																mikkelsen partially reprogrammed to pluripotency	6	0.0349515	0.393444
																cairo hepatoblastoma classes up	354	0.0205761	0.397163
																reactome runx1 interacts with co factors whose precise effect on runx1 targets is not known	26	0.0165289	0.401222
																kegg cell cycle	84	0.0121704	0.400892
																bacolod resistance to alkylating agents dn	33	0.0020202	0.401197
																xu response to tretinoin dn	6	0.00817996	0.401261
																reactome nucleobase biosynthesis	12	0.0489796	0.400603
																goldrath antigen response	177	0.0471513	0.400078
																pujana brca2 pcc network	275	0.0282258	0.398489
																reactome hdr through single strand annealing ssa	24	0.0497018	0.397337
																pid pi3kci akt pathway	24	0.00806452	0.397975
																reactome epigenetic regulation of gene expression	87	0.0322581	0.3973
																reactome deubiquitination	162	0.0101833	0.397106
																huang dasatinib resistance dn	37	0.0123967	0.396255
																reactome trna aminoacylation	27	0.0101626	0.396372
																della response to tsa and butyrate	11	0.0362903	0.39747
																bredemeyer rag signaling via atm not via nfkb dn	20	0.012	0.39652
																benporath cycling genes	371	0.0121951	0.396268
																reactome polo like kinase mediated events	9	0.0328542	0.394928
																boyault liver cancer subclass g23 up	35	0.0401606	0.396062
																vernell retinoblastoma pathway dn	16	0.0186335	0.399074
																johnstone parvb targets 3 dn	457	0.0163599	0.398873
																peart hdac proliferation cluster dn	46	0.0162272	0.397804
																rhodes cancer meta signature	33	0.0246407	0.396793
																chiang liver cancer subclass polysomy7 up	40	0.046875	0.405077
																ren bound by e2f	37	0.0349794	0.407861
																kegg basal transcription factors	15	0.010352	0.408332
																pid aurora a pathway	19	0.0218254	0.40976
																sasaki adult t cell leukemia	95	0.0296443	0.409858
																bhati g2m arrest by 2methoxyestradiol up	56	0.0412574	0.408627
																reactome cytosolic trna aminoacylation	13	0.0284553	0.407965
																boyault liver cancer subclass g2	19	0.0365854	0.408142
																tarte plasma cell vs plasmablast dn	177	0.0202429	0.407862
																reactome protein ubiquitination	34	0.0221328	0.41006
																west adrenocortical tumor up	158	0.0307377	0.410993
																castellano hras targets dn	4	0.0374532	0.411622
																park hsc and multipotent progenitors	27	0.0143443	0.411391
																rhein all glucocorticoid therapy dn	202	0.0142857	0.410474
																pid atr pathway	28	0.0473251	0.410697
																pid fanconi pathway	32	0.0306122	0.411088
																reactome methionine salvage pathway	4	0.0341151	0.410788
																reactome integration of provirus	6	0.0164948	0.410638
																pid rac1 pathway	36	0.0143737	0.411164
																reactome sumoylation of chromatin organization proteins	48	0.0142857	0.412515
																kegg aminoacyl trna biosynthesis	28	0.0162933	0.411463
																sa g1 and s phases	8	0.0298805	0.411444
																reactome transcriptional regulation by runx1	136	0.0235756	0.413983
																kegg oocyte meiosis	70	0.0358566	0.413073
																biocarta ptdins pathway	19	0.0262626	0.413054
																reactome fertilization	22	0.0195312	0.416352
																caffarel response to thc 24hr 5 dn	33	0.0470588	0.415817
																reactome interconversion of nucleotide di and triphosphates	16	0.0479042	0.41763
																fevr ctnnb1 targets dn	324	0.0307377	0.416765
																reactome regulation of tp53 activity through phosphorylation	52	0.0321285	0.415891
																biocarta arap pathway	16	0.00619835	0.413452
																reactome muscarinic acetylcholine receptors	3	0.00580271	0.411664
																ceballos targets of tp53 and myc up	12	0.0285132	0.412072
																reactome mitotic g1 g1 s phases	88	0.0185185	0.414057
																boyault liver cancer subclass g6 up	41	0.0377734	0.414196
																reactome transcription of e2f targets under negative control by p107 rbl1 and p130 rbl2 in complex with hdac1	8	0.0388548	0.41322
																lau apoptosis cdkn2a up	23	0.0446247	0.413327
																blum response to salirasib dn	200	0.044	0.41359
																rodrigues thyroid carcinoma poorly differentiated up	335	0.0122951	0.415758
																darwiche papilloma risk low dn	91	0.037037	0.415117
																sa g2 and m phases	8	0.0335306	0.415569
																biocarta plk3 pathway	7	0.0122699	0.420086
																abramson interact with aire	29	0.0382979	0.419933
																reactome dna repair	191	0.0123203	0.420793
																pujana chek2 pcc network	434	0.0225873	0.420285
																seiden met signaling	13	0.0123967	0.420547
																reactome signaling by mst1	2	0.0103093	0.422127
																wang response to bexarotene up	24	0.0430528	0.422607
																reactome chk1 chk2 cds1 mediated inactivation of cyclin b:cdk1 complex	7	0.0392157	0.421976
																reactome vitamin b5 pantothenate metabolism	12	0.0270833	0.422094
																benporath es 1	231	0.0283401	0.424416
																pid bard1 pathway	19	0.0323232	0.42396
																reactome synthesis of glycosylphosphatidylinositol gpi	10	0.0440252	0.423813
																reactome pka mediated phosphorylation of key metabolic factors	4	0.042065	0.42299
																nadella prkar1a targets up	6	0.0435644	0.422168
																reactome activation of noxa and translocation to mitochondria	3	0.0438247	0.422013
																reactome signaling by notch	140	0.0303644	0.422916
																reactome chromatin organization	162	0.0185185	0.422009
																weber methylated icp in sperm up	7	0.0093985	0.421355
																setlur prostate cancer tmprss2 erg fusion up	43	0.038	0.420556
																ule splicing via nova2	38	0.0359281	0.420075
																holleman prednisolone resistance b all up	10	0.0479303	0.419532
																verrecchia response to tgfb1 c3	9	0.0374753	0.419679
																mohankumar hoxa1 targets up	236	0.0327869	0.4187
																mullighan npm1 mutated signature 2 dn	51	0.0364372	0.418446
																ivanov mutated in colon cancer	11	0.0334029	0.420055
																stoner esophageal carcinogenesis dn	3	0.042885	0.419733
																kyng response to h2o2 via ercc6 up	23	0.0227743	0.420734
																reactome transport of mature transcript to cytoplasm	51	0.0306748	0.421309
																ju aging terc targets up	6	0.0485437	0.42121
																whitfield cell cycle m g1	79	0.00824742	0.425536
																kegg amino sugar and nucleotide sugar metabolism	32	0.0205339	0.424326
																lee bmp2 targets dn	493	0.020284	0.428013
																busa sam68 targets dn	3	0.0357853	0.430961
																kokkinakis methionine deprivation 96hr dn	46	0.0425963	0.430414
																reactome uch proteinases	52	0.0348361	0.439653
																he pten targets up	10	0.0340681	0.440767
																reactome the role of gtse1 in g2 m progression after g2 checkpoint	48	0.0409836	0.438573
																mueller plurinet	175	0.0479167	0.438227
																wamunyokoli ovarian cancer grades 1 2 up	84	0.0308642	0.440877
																pid ceramide pathway	24	0.0331263	0.442054
																watanabe colon cancer msi vs mss up	17	0.0337972	0.442898
																reactome transport and synthesis of paps	2	0.0252632	0.442999
																reactome esr mediated signaling	121	0.0199601	0.44312
																xu hgf targets repressed by akt1 up	5	0.0420842	0.441764
																wei mycn targets with e box	416	0.010142	0.440643
																reactome darpp 32 events	17	0.0320641	0.440439
																maloney response to 17aag dn	33	0.034413	0.439378
																benporath myc max targets	398	0.00413223	0.441212
																kim wt1 targets dn	264	0.022449	0.441304
																nuytten ezh2 targets dn	571	0.0184049	0.440426
																reactome regulation of tp53 activity	107	0.0102881	0.443253
																karlsson tgfb1 targets up	65	0.0182186	0.443816
																whitfield cell cycle g2 m	124	0.0320641	0.443958
																jiang tip30 targets dn	16	0.0325203	0.444103
																wong proteasome gene module	21	0.0476191	0.442584
																reactome mitochondrial trna aminoacylation	16	0.047817	0.441516
																creighton akt1 signaling via mtor up	16	0.0475207	0.441273
																grade colon and rectal cancer up	161	0.0121212	0.440423
																reactome defects in vitamin and cofactor metabolism	8	0.0488798	0.440661
																schuhmacher myc targets up	40	0.0311203	0.441745
																kegg n glycan biosynthesis	26	0.0329218	0.443932
																chiang liver cancer subclass unannotated dn	86	0.0224949	0.443284
																kegg p53 signaling pathway	39	0.0305499	0.442709
																reactome metabolism of folate and pterines	10	0.0364372	0.441431
																wallace prostate cancer race dn	46	0.0287474	0.441964
																pid atm pathway	24	0.0446247	0.441274
																biocarta g1 pathway	23	0.0184805	0.439481
																pujana breast cancer lit int network	63	0.0471311	0.440728
																choi atl stage predictor	18	0.0207039	0.445356
																wang response to forskolin up	13	0.0325866	0.447624
																sesto response to uv c2	28	0.0265849	0.447425
																ozanne ap1 targets dn	4	0.0462777	0.448081
																caffarel response to thc 24hr 5 up	18	0.0329897	0.449795
																martinez response to trabectedin dn	166	0.0263692	0.450062
																dang bound by myc	566	0.00612245	0.452208
																reactome s phase	96	0.0348361	0.45468
																reactome inactivation of cdc42 and rac1	5	0.040404	0.460414
																wang recurrent liver cancer up	16	0.0494845	0.459484
																tien intestine probiotics 24hr dn	121	0.0162272	0.458711
																elvidge hif1a targets up	36	0.0330578	0.459922
																reactome sumoylation of dna damage response and repair proteins	58	0.0372671	0.467519
																reactome sumoylation	134	0.0163934	0.465441
																dodd nasopharyngeal carcinoma dn	747	0.0470348	0.464683
																watanabe rectal cancer radiotherapy responsive up	57	0.022449	0.465409
																browne hcmv infection 24hr up	94	0.0363636	0.463893
																acevedo liver tumor vs normal adjacent tissue up	440	0.00201207	0.463928
																tien intestine probiotics 24hr up	258	0.0434783	0.464543
																reactome signaling by nuclear receptors	145	0.0459082	0.463537
																reactome retrograde transport at the trans golgi network	28	0.0390947	0.461912
																casorelli acute promyelocytic leukemia dn	389	0.026694	0.460624
																chandran metastasis up	123	0.0303644	0.460249
																reactome hedgehog off state	73	0.0284553	0.461816
																borczuk malignant mesothelioma up	154	0.0307377	0.461213
																welcsh brca1 targets up	113	0.0245902	0.46213
																guo hex targets up	50	0.0143443	0.461247
																mili pseudopodia haptotaxis up	265	0.0183299	0.460592
																reactome signaling by hedgehog	99	0.00817996	0.460533
																patil liver cancer	372	0.0284553	0.462179
																bild e2f3 oncogenic signature	123	0.0427699	0.463997
																yao temporal response to progesterone cluster 11	55	0.0404858	0.464395
																diaz chronic meylogenous leukemia up	799	0.0121212	0.470955
																reactome synthesis of gdp mannose	2	0.0463158	0.468816
																goldrath homeostatic proliferation	69	0.0384615	0.483709
																pid met pathway	54	0.0388548	0.48502
																pellicciotta hdac in antigen presentation dn	29	0.0487805	0.488331
																krige response to tosedostat 24hr dn	522	0.029106	0.48853
																krige response to tosedostat 6hr dn	466	0.0227273	0.487988
																ivanova hematopoiesis early progenitor	233	0.0346232	0.490242
																pilon klf1 targets dn	1120	0.0102249	0.492742
																reactome generic transcription pathway	733	0.036961	0.489691
																spielman lymphoblast european vs asian up	253	0.0367347	0.491154
																basaki ybx1 targets dn	213	0.0324544	0.493159
																lastowska neuroblastoma copy number dn	455	0.0286299	0.495748
																reactome cellular responses to stress	263	0.0245399	0.495762
																reactome gene expression transcription	889	0.0349076	0.496594
																reactome post translational protein modification	862	0.0489796	0.499194
																osman bladder cancer up	228	0.0387755	0.498141
																reactome asparagine n linked glycosylation	187	0.0362173	0.502587
																acevedo liver cancer up	511	0.0363636	0.502577

## Sheet: DAVID
Supplementary Table 7B. DAVID enrichment analysis of mutations for White, Black and Asian PCa patients.
White				Black				Asian
Term	Count	PValue	Genes	Term	Count	PValue	Genes	Term	Count	PValue	Genes
hsa00982:Drug metabolism - cytochrome P450	12	0.0961752	FMO5, FMO1, GSTK1, FMO3, ADH6, UGT2B4, ADH1A, ADH7, UGT2B10, UGT2B15, UGT2B28, UGT2B7	GO:0042738~exogenous drug catabolic process	4	0.0812822	NOS1, CYP2B6, CYP2C9, CYP2C8	GO:0005509~calcium ion binding	25	0.00036784	DCHS2, LRP1B, PADI3, MMP27, PCDHB1, DUOX1, PCDHGC5, NID2, RPH3A, NOTCH3, HMCN1, FAT3, FAT4, ADGRV1, SLC24A1, RYR1, RYR2, PCDHA10, FBN3, SPTA1, LRP2, TBC1D8B, THBS3, CACNA1B, CDH23
GO:0005524~ATP binding	223	3.45664e-09	KIFC1, ADCY8, ACTG1, KIF13A, ATP2B2, MAP3K6, DDX11, PIK3C3, DYNC2H1, PIK3CA, HFM1, PIK3CG, YARS, BRAF, MYH1, KIF5A, ABCB11, MYH3, PIK3CD, MYH2, MYLK4, MYH7, MYH6, LIG4, MYH9, MYH8, MARK1, MARK2, RFC5, MYO18B, SCYL1, SCYL2, NAV2, NEK8, DNAH11, DNAH10, ERBB4, PFKFB4, DNAH17, PFKFB1, UBA7, ATP12A, KRAS, POLQ, RARS2, MAP2K3, MAP2K4, ATR, RAD54L, ATP13A2, ATM, EPHA2, ATP13A5, ABCG1, DDX6, ATP13A4, HYO…	GO:0017144~drug metabolic process	6	0.0822503	CYP1A1, CYP2B6, CYP2C9, CYP2C8, CAD, CYP4F12	GO:0045211~postsynaptic membrane	10	0.00596066	EPHA7, ARHGAP32, ANK2, CADPS2, ADORA2A, GABRB1, LRRTM1, SHANK1, PTEN, DISC1
GO:0005509~calcium ion binding	120	6.3593e-08	EFCC1, S100A8, MASP2, LTBP4, S100A9, NELL2, SYT9, RCVRN, ITSN2, TTN, MMRN1, ATP2B2, CDH20, HMCN1, FSTL5, PCDHGA12, BRAF, EFCAB14, CRTAC1, SPARCL1, LRP1B, CHP2, PCLO, RYR3, RYR1, RYR2, DST, EFCAB7, EFCAB5, PAMR1, FLG2, PCDHAC1, PEF1, MACF1, PLCH2, PLCH1, PCDHA12, AGRN, NIN, HPCAL4, EFEMP1, PCDH10, PCDH15, CELSR2, PCDH17, DSG4, PLA2G4A, FLG, ATP2A1, RHOT1, CACNA1E, SPTA1, TLL2, SYT17, CACNA1A, PCDH…	GO:0005509~calcium ion binding	117	9.65376e-12	LTBP1, LTBP2, MASP1, NELL1, LTBP4, FSTL4, RCVRN, SYT7, EDIL3, TTN, PRKCSH, SHH, ATP2B2, HMCN1, ASPH, CDH23, BRAF, SCUBE1, CDHR1, LRP1B, RPH3A, PKD2L1, RYR1, DST, ME3, EFCAB6, PCDHAC1, MACF1, PCDHA10, PCDHA12, PCDHA13, S100P, CUBN, SYT10, PCDH10, PCDH12, MYL12B, CELSR1, CPS1, PCDH17, GAS6, NOTCH3, CBLB, DSG1, CACNA1E, SPTA1, PDCD6, CACNA1A, PCDHA6, PCDHA7, PCDHA8, PCDHA9, NPNT, CLSTN1, PCDHA5, PCD…	GO:0051924~regulation of calcium ion transport	4	0.00654751	ANK2, GNAI2, ADORA2A, CACNA1B
GO:0016887~ATPase activity	38	4.11708e-05	ABCA8, DNAH11, ABCA7, DNAH10, KIFC1, KIF25, ABCA9, DNAH17, IDE, ABCA4, DNAH5, KIF13A, KIF2B, KIF2C, MACF1, DYNC2H1, KIF21A, MDN1, ABCA13, HSPA8, MSH6, RALBP1, MYH7, MYH6, MYH9, ATP13A2, MYH8, ATP13A5, ABCG1, ATP13A4, KIF1C, DNA2, RFC3, PSMC1, RUVBL1, MYO19, DST, SMARCA4	GO:0044325~ion channel binding	26	7.93948e-06	KCNH1, CAV3, KCNC1, CHERP, AKAP9, PRKCSH, RIMS2, CDH5, CTNNB1, PKD2, CAMK2D, PKD1, KCNE2, USP10, ASPH, KCNQ1, SCN10A, SLC8A1, KCND3, NOS1, KCNB1, VDAC1, PPP1R9A, ABCC9, AKAP6, LRRK2	GO:0007167~enzyme linked receptor protein signaling pathway	3	0.00866842	ERBB2, JAK2, SYK
GO:0045211~postsynaptic membrane	40	0.000112812	LZTS1, SYNDIG1, GRIP1, RUSC1, PDLIM5, GRIK3, CLSTN1, UTRN, PTEN, ANK1, GRIN2B, ANK2, LRRTM3, ANK3, LRRTM1, DLG4, CHRNA6, FBXO45, LRRC7, DLG2, GABRP, SYNPO, GABRE, DLGAP1, PCDHB8, DLGAP3, COL13A1, GRIN2A, GRIA4, SHANK3, SYNE1, CADPS2, P2RX1, ARF1, KLHL17, SEMA4F, GRIA1, CHRNG, DNM2, OPRD1	GO:0098656~anion transmembrane transport	12	2.57598e-05	SLC4A10, SLC5A5, ABCC9, SLC22A7, SLC22A8, ABCC3, SLC4A8, SLC4A7, SLC4A9, ABCA1, ABCC5, VDAC1	GO:0005524~ATP binding	36	0.00983363	PRKCZ, MYO7B, ERBB2, FKBP4, QARS, IARS2, MYO9A, EPHB1, KIF13A, CHD9, CHD7, VWA8, DDX60, MYO15A, ZAP70, CDK14, SYK, CSF1R, CARS, SMCHD1, TP53, ACACA, MYH7, HLTF, ATP13A5, EPHA7, PSMC6, OASL, KSR2, KCNT2, MYH11, RAD54B, CARS2, JAK2, MVK, CACNA1B
GO:0005886~plasma membrane	475	0.000142549	SLC9A5, CROCC, NPY4R, L1CAM, IGHM, KIAA0319L, CTNNB1, ACTG1, CDH20, GRIN2B, OR52L1, DIRAS3, KCNK7, PIK3CA, HTR1D, HTR1E, PIK3CG, PTPRF, CLCA4, BRAF, PIK3CD, GRIN2A, F8, LIG4, PTPRU, MYH9, HLA-DQA2, MARK1, MARK2, ERMAP, SSTR4, MGAM, RYR1, RYR2, OR10K1, GNAI3, ERBB4, GNAI2, RTP1, ATP12A, SLC29A2, KLRF1, IGKC, SGIP1, PTH2R, EPM2A, PCDH10, PCDH15, PCDH17, KCNK2, NPY5R, ARF1, RGS3, KCNJ8, CD209, RGS6,…	GO:0008509~anion transmembrane transporter activity	7	2.59721e-05	SLC4A10, SLC4A8, SLC4A7, SLC4A2, SLC4A1, SLC4A9, ABCA1	GO:0015278~calcium-release channel activity	3	0.0121214	TRPA1, RYR1, RYR2
GO:0045296~cadherin binding	9	0.00143652	PROM1, CTNNAL1, CDH13, ANK3, CTNND1, CTNNA3, CTNNB1, APC, VCL	GO:0016887~ATPase activity	34	3.15475e-05	DNAH11, DNAH17, INO80, MYO9B, DNAH1, ABCA1, ABCA4, DNAH8, RNF213, DNAH5, DNAH6, KIF13A, CHD1L, MACF1, VWA8, DYNC2H1, DHX16, KIF21A, ATP5H, ABCA13, KIF2A, MSH2, MYH4, CENPE, ATP1A2, ATP13A5, KIF1C, PSMC5, SMARCA5, KIF19, RUVBL2, ATP5A1, SMARCA1, DST	GO:0050808~synapse organization	4	0.0158707	TNR, SEMA3E, LRRTM1, PCDHGC5
GO:0043142~single-stranded DNA-dependent ATPase activity	6	0.00182507	RFC5, DNA2, RFC3, CHTF18, RAD18, POLQ	GO:0005249~voltage-gated potassium channel activity	16	7.8107e-05	KCNH1, KCNC1, KCND3, KCNC4, KCNB1, CNGA4, CNGA1, KCNU1, KCNQ5, KCNT1, KCNH7, KCNE2, HCN4, KCNQ2, KCNH3, KCNQ1	GO:0002039~p53 binding	5	0.0205219	USP7, HTT, TP53BP1, CREBBP, TP53
hsa04015:Rap1 signaling pathway	37	0.00233816	PRKCZ, ITGAL, GNAI3, GNAI2, RAP1GAP, ADCY8, CSF1, FPR1, LPAR3, CTNND1, KIT, APBB1IP, ITGAM, CTNNB1, ACTG1, IGF1R, PLCB4, KRAS, GRIN2B, RAPGEF6, RHOA, PIK3CA, RAPGEF4, AKT3, PIK3R1, PIK3R2, PIK3CG, EGFR, BRAF, MAP2K3, MET, PIK3CD, GRIN2A, HGF, EPHA2, PRKD2, NGF	GO:0070588~calcium ion transmembrane transport	25	8.78129e-05	TRPM4, SLC8A1, TRPC4, TRPM7, CACNG7, TRPA1, GRIN2A, SLC24A5, CACNB4, CACNA2D3, CACNA1S, PKD2L1, GAS6, ATP2B2, ATP2C2, SLC24A3, GRM7, SLC24A1, CACNA1G, PKD2, PKD1, CACNA1E, ASPH, CACNA1D, CACNA1A	GO:0005262~calcium channel activity	5	0.0236853	TRPA1, SLC24A1, RYR1, RYR2, CACNA1B
hsa04151:PI3K-Akt signaling pathway	54	0.00323324	PPP2R5A, PPP2R5C, LPAR3, RPS6KB2, PTEN, CASP9, PIK3CA, COL11A1, AKT3, PIK3CG, EGFR, RBL2, PIK3CD, TP53, PKN2, RPTOR, COL1A2, RELN, COL24A1, NGF, CSF1, KIT, ATF2, IGF1R, KRAS, PPP2CB, COL6A3, GYS1, PRKAA2, LAMB1, THBS3, PIK3R1, EPO, THBS4, FN1, PIK3R2, COL4A4, COL4A3, TNXB, MET, ITGA2, ITGA4, HGF, BRCA1, EPHA2, COL5A1, LAMA1, GH1, TSC2, ITGA7, JAK1, MTOR, IFNA16, IL3RA	GO:0007196~adenylate cyclase-inhibiting G-protein coupled glutamate receptor signaling pathway	6	9.2886e-05	GRM4, GRM3, GRM8, GRM7, GRIK3, GRM6	GO:0016887~ATPase activity	8	0.0247785	KIF13A, RFC3, PSMC6, VWA8, MYH7, HLTF, RNF213, ATP13A5
GO:0043547~positive regulation of GTPase activity	80	0.00339463	RASGEF1C, ITSN2, ARHGAP15, GARNL3, SMAP2, WNT4, TBC1D17, ARHGAP20, S1PR1, GBF1, GRIN2B, RAPGEF6, DLG4, RAPGEF4, DOCK10, DOCK11, NRG2, ERRFI1, ADGRB3, ALS2CL, NET1, ARHGAP9, EGFR, DENND6B, DEPDC7, RALBP1, ARHGEF19, GRIN2A, GRHL3, DEPDC1, HERC2, HERC1, ARHGAP25, RIC8A, ARHGAP30, SH2D3C, SBF2, FNBP1L, JUN, SPATA13, RIN3, SPTB, ERBB4, RAP1GAP, TBC1D3I, ARHGAP36, ASAP1, KIT, RCC1, OCRL, DENND2C, LLGL2…	hsa04510:Focal adhesion	35	0.000118746	CAV3, TNC, CTNNB1, LAMB4, IGF1R, COL6A6, COL27A1, SOS1, COMP, PIK3CA, PIK3R3, RAPGEF1, ACTB, PIK3CG, COL4A4, FLT1, BRAF, MYL12B, CAPN2, FLNC, COL5A3, VAV1, BIRC2, COL5A1, VWF, MAPK1, ITGA9, LAMA4, PPP1CA, LAMA3, CCND3, LAMC3, RELN, COL1A1, LAMC1	GO:0048763~calcium-induced calcium release activity	2	0.0608826	RYR1, RYR2
GO:0034765~regulation of ion transmembrane transport	22	0.00459343	HCN1, KCNJ16, KCNA2, NOX1, KCNA1, SCN2A, ASIC2, KCNA3, KCNA7, CATSPER4, KCNK7, KCNJ8, CATSPER1, KCNH6, CACNA1E, SCN11A, NALCN, SCN7A, CACNA1A, KCNH4, SCN4A, KCNH5	GO:0051966~regulation of synaptic transmission, glutamatergic	9	0.000505462	GRM4, GRM3, GRM8, GRM7, CNR1, GRM6, ATP1A2, LRRK2, GRM1	GO:0005219~ryanodine-sensitive calcium-release channel activity	2	0.0608826	RYR1, RYR2
GO:0071805~potassium ion transmembrane transport	23	0.00616815	SLC12A6, HCN1, KCNC1, SLC12A9, KCNAB2, SLC9A5, KCNA2, SLC12A5, KCNA1, KCNA3, CNGB1, KCNA7, KCNK2, CCT8L2, KCNT2, KCNK7, KCNH6, NALCN, KCNQ1, KCNG1, KCNH4, SLC9A1, KCNH5	GO:0005262~calcium channel activity	16	0.000714819	TRPM4, TRPC4, TRPM7, CACNG7, TRPA1, SLC24A5, GRIN2A, CACNB4, CACNA2D3, PKD2L1, SLC24A3, SLC24A1, RYR1, PKD1, CACNA1E, CACNA1A	GO:0006874~cellular calcium ion homeostasis	5	0.0636957	ANK2, SLC24A1, RYR2, CD40, ATP13A5
GO:1901796~regulation of signal transduction by p53 class mediator	23	0.00825337	TAF1, NBN, RBBP4, TP53BP2, PRKAG2, TP53, BRIP1, SMYD2, ATR, RMI1, TP73, BRCA1, ATM, JMY, RFC5, DNA2, BRPF1, RFC3, EP300, HDAC1, TOP3A, PRKAA2, CHD4	GO:0006816~calcium ion transport	17	0.000773151	RAMP3, TRPC4, CLCA1, CACNG7, CACNA1S, ITPR1, ATP2B2, NMUR2, SLC24A1, PKD2, RYR1, CAMK2D, CHRNB2, CACNA1D, CAMK2A, CACNA1A, CDH23	GO:0005516~calmodulin binding	7	0.0757603	PHKB, MYO15A, RYR1, MYH11, RYR2, MYH7, SCN5A
GO:0034704~calcium channel complex	8	0.00933295	TRPC5, RYR3, ATP2A1, RYR1, RYR2, PRKACA, PDE4D, PKD1L1	GO:0007268~chemical synaptic transmission	37	0.00101307	KCNC4, GABRB2, LPAR3, AKAP9, CACNB4, GJC1, CTNNB1, KCNQ5, SYPL1, GRIN2B, PCDHB16, SLC1A6, KCNQ2, HTR1D, APBA1, HTR1E, LRFN2, SLC12A6, SLC12A7, PTPRD, PCDHB6, SYT10, SLC6A13, GRIN2A, GRIA4, NRXN1, DBH, GRM1, GRM4, MAPK1, GRM3, GRIA2, GRIA1, GRM7, GRM6, CACNA1G, CACNA1E	hsa04020:Calcium signaling pathway	7	0.076249	ADORA2A, PHKB, ERBB2, GRPR, RYR1, RYR2, CACNA1B
hsa04024:cAMP signaling pathway	33	0.00970825	ACOX1, GNAI3, GNAI2, ADCY8, DRD5, CNGB1, ATP2B2, GRIN2B, RHOA, PIK3CA, PRKACA, RAPGEF4, HHIP, HTR1D, PIK3R1, AKT3, HTR1E, PIK3R2, NFATC1, PIK3CG, VAV3, BRAF, PIK3CD, GRIN2A, ATP1A3, PDE4D, GRIA4, EP300, GRIA1, JUN, RYR2, GLP1R, SLC9A1	GO:0005229~intracellular calcium activated chloride channel activity	7	0.00146406	CLCA1, BEST1, NMUR2, ANO1, ANO3, ANO4, ANO10	GO:0005829~cytosol	76	0.000350684	CTNNAL1, SEC24B, GFAP, GMPR2, AP1B1, PHKB, VPS54, UBQLN4, QARS, IARS2, RNF213, PTEN, BBOX1, ARHGAP12, CUL3, RAD21, VPS13C, ANK2, SMOX, MKL1, DUS1L, AHNAK, CDK14, GOLGA3, STAG1, SYK, CARS, TP53, PADI3, RPH3A, ARHGAP26, ARHGEF10, TRIM37, ARHGAP32, ZWINT, MTAP, AKAP7, MVK, NUP107, SPTB, USP7, PRKCZ, HAUS6, GNAI2, FKBP4, MYO9A, EPHB1, GCKR, ZAP70, KBTBD7, SH2B3, FBXO5, TNKS, ODF2, TRAF5, ARHGDIB, DTX…
hsa05215:Prostate cancer	18	0.0101066	EGFR, PIK3CG, BRAF, KLK3, PIK3CD, TP53, PTEN, INSRR, CTNNB1, IGF1R, EP300, KRAS, CASP9, PIK3CA, MTOR, AKT3, PIK3R1, PIK3R2	GO:0071805~potassium ion transmembrane transport	22	0.00184055	KCNH1, SLC12A6, KCNC1, SLC12A7, KCNC4, SLC9A5, KCNB1, CNGA4, KCNK2, PKD2L1, CNGA1, KCNU1, KCNQ5, KCNT1, PKD2, KCNH7, KCNE2, SLC9C2, HCN4, KCNQ2, KCNH3, KCNQ1	hsa05169:Epstein-Barr virus infection	9	0.000891449	USP7, ITGAL, PSMC6, TP53, CD40, TRAF5, TAB2, NCOR2, SYK
GO:0005516~calmodulin binding	31	0.010289	SLC8A3, ITPKB, TTN, ATP2B2, TRPV6, CDK5RAP2, KCNQ1, EGFR, OBSCN, NOS1, MYH1, EPB41, MYH3, MYO1E, MYH2, UBR4, MYH7, MYH6, MYH9, MYH8, IQCF2, CTH, RYR3, MAP2, RYR1, RYR2, MYH13, GAP43, ADD2, SLC9A1, KCNH5	hsa04725:Cholinergic synapse	20	0.00240295	PIK3CG, GNAI1, ADCY8, ADCY6, CACNA1S, ITPR1, KCNQ5, MAPK1, ATF4, GNB1, CHRNB4, CAMK2D, PIK3CA, CHRNB2, KCNQ2, PIK3R3, CACNA1D, CAMK2A, KCNQ1, CACNA1A	GO:0016604~nuclear body	5	0.00165513	USP7, CREBBP, TP53, ZFHX3, NCOR2
GO:0030134~ER to Golgi transport vesicle	8	0.0116937	KIAA0368, COL7A1, YIPF6, VANGL2, F8, PCSK9, YIPF5, GOLGA2	GO:0000981~RNA polymerase II transcription factor activity, sequence-specific DNA binding	27	0.00284568	ZNF518B, ELF4, ARNT2, SOX9, FOXS1, OVOL2, POU4F2, FOXB2, SPIB, CC2D1A, FOXD2, ETV4, ZMYM3, FOXA1, SOX30, ZNF770, TP53, TTF1, FOXP4, FOXP2, ATF4, DMTF1, SP3, FOXG1, HIF3A, FOXC1, BMPR1A	GO:0002027~regulation of heart rate	5	0.00187832	ANK2, RYR2, MYH7, SCN5A, SCN10A
hsa04020:Calcium signaling pathway	30	0.0129839	SLC8A3, CYSLTR1, ERBB4, TACR3, CYSLTR2, ADCY8, DRD5, BDKRB1, ITPKB, ATP2B2, PLCB4, PRKACA, EGFR, NOS1, MYLK4, GRIN2A, ITPR3, GRM1, ITPR2, PPIF, GNAL, P2RX1, RYR3, PLCG2, ATP2A1, RYR1, AVPR1A, RYR2, CACNA1E, CACNA1A	GO:0042734~presynaptic membrane	13	0.00512166	KCNH1, GRIN2A, NRXN1, SYT7, RIMS2, KCTD8, GRM4, GRM3, GRM8, GRM7, GRM6, ERC1, CAMK2A	GO:0005856~cytoskeleton	15	0.00214451	CTNNAL1, MYO7B, FRMPD2, FRMPD1, EPB41L4B, KLHL4, ARHGAP26, ARHGAP21, TNS1, FRMD7, ANK2, MYO15A, JAK2, SNTG2, ARHGDIB
GO:0005249~voltage-gated potassium channel activity	13	0.0133474	HCN1, KCNC1, KCNAB2, KCNA2, KCNA1, CNGB1, KCNA7, KCNT2, KCNH6, KCNQ1, KCNH4, KCNG1, KCNH5	GO:0005245~voltage-gated calcium channel activity	10	0.00574504	CACNG7, GRM7, PKD2, RYR1, CACNA1E, CACNB4, CACNA1D, CACNA1S, GAS6, CACNA1A	GO:0060291~long-term synaptic potentiation	5	0.00318139	PRKCZ, GFAP, TNR, LRRTM1, PTEN
GO:0060291~long-term synaptic potentiation	10	0.0136517	SLC8A3, PRKCZ, BRAF, LRRTM1, GRIN2A, PTN, RELN, ITPR3, PTEN, SHANK3	GO:0034765~regulation of ion transmembrane transport	19	0.00777057	KCNH1, KCND3, SCN1A, KCNC4, KCNB1, CACNA2D3, CACNA1S, KCNU1, KCNQ5, CYBB, CACNA1G, KCNH7, CACNA1E, SCN8A, KCNQ2, HCN4, KCNH3, CACNA1A, SCN10A	GO:0003727~single-stranded RNA binding	5	0.00441066	A1CF, DDX60, NXF1, SNRPC, HNRNPA1
hsa04150:mTOR signaling pathway	13	0.0169172	PIK3CG, BRAF, PIK3CD, RPS6KB2, PTEN, RPTOR, TSC2, PIK3CA, MTOR, PRKAA2, PIK3R1, AKT3, PIK3R2	GO:0005891~voltage-gated calcium channel complex	8	0.00897277	CACNG7, CACNA1G, CACNA1E, CACNB4, CACNA2D3, CACNA1D, CACNA1S, CACNA1A	GO:0055117~regulation of cardiac muscle contraction	4	0.00445836	BMP10, ANK2, RYR2, SCN10A
hsa05200:Pathways in cancer	56	0.0180467	ADCY8, MMP9, SPI1, LPAR3, PTEN, TGFB1, CTNNB1, WNT4, PLCB4, CASP9, RHOA, PIK3CA, PRKACA, RARB, HHIP, TPR, AKT3, PIK3CG, EGFR, BRAF, RALBP1, PIK3CD, TP53, RUNX1T1, CTNNA3, EP300, JUN, DCC, GNAI3, GNAI2, BDKRB1, ZBTB16, KIT, IGF1R, KRAS, LAMB1, PIK3R1, FN1, APC, PIK3R2, COL4A4, DVL3, MSH6, COL4A3, MSH3, KLK3, MET, ITGA2, HGF, FZD4, LAMA1, HDAC1, PLCG2, JAK1, PTCH2, MTOR	GO:0090279~regulation of calcium ion import	4	0.0109807	CAV3, PKD2, WNK3, CTNNB1	GO:0045121~membrane raft	10	0.00509773	PRKCZ, ANK2, GNAI2, TNR, NPHS2, ZAP70, CNTN1, JAK2, EPHB1, AHNAK
GO:0051056~regulation of small GTPase mediated signal transduction	23	0.019633	DEPDC7, NGEF, OBSCN, VAV3, RAP1GAP, RALBP1, RALGAPB, ARHGAP36, ARHGAP15, OCRL, ARHGAP25, ARHGAP30, RALGAPA2, GARNL3, ARHGAP20, GMIP, TSC2, RHOA, RHOT1, INPP5B, NET1, PIK3R2, ARHGAP9	GO:0006812~cation transport	8	0.0132397	TRPM7, ANO1, PANX3, HCN4, ATP13A5, PKD2L1, TMEM63C, ANO10	GO:0043931~ossification involved in bone maturation	3	0.00516555	FAT4, RYR1, THBS3
GO:0015278~calcium-release channel activity	5	0.0201458	JPH2, RYR3, RYR1, RYR2, ITPR3	GO:0006811~ion transport	20	0.014723	SLC12A6, SLC12A7, SLC8A1, SLC5A5, MLC1, SLC9A5, GABRB2, TRPA1, SLC24A5, WNK1, LHFPL5, CYBB, SLC24A3, SLC1A6, SLC24A1, SLC26A9, SLCO1B1, CHRNB4, CHRNB2, LRRC55	GO:0031625~ubiquitin protein ligase binding	12	0.00548172	CUL3, TRIM37, USP7, LTBR, PRKAR1A, TP53, PAX6, CD40, HLTF, TRAF5, SCN5A, SPOP
GO:0007193~adenylate cyclase-inhibiting G-protein coupled receptor signaling pathway	11	0.0201795	GNAL, GNAI3, S1PR1, GNAI2, ADCY8, FFAR3, NPY2R, HTR1D, OPRD1, RIC8A, HTR1E	GO:0005234~extracellular-glutamate-gated ion channel activity	6	0.0151594	GRIN2B, GRIA2, GRIA1, GRIK3, GRIN2A, GRIA4	GO:0051899~membrane depolarization	4	0.00735274	PRKCZ, ADORA2A, SCN5A, CACNA1B
GO:0051209~release of sequestered calcium ion into cytosol	10	0.022161	PTPRC, JPH2, RYR3, PLCG2, RYR1, RYR2, ITPR3, HTR1D, ITPR2, HTR1E	GO:0005227~calcium activated cation channel activity	5	0.0203496	TRPM4, ANO1, PKD2L1, TMEM63C, ANO10	GO:0070372~regulation of ERK1 and ERK2 cascade	4	0.00735274	EPHA7, ERBB2, EPHB1, SYK
GO:0005262~calcium channel activity	14	0.0243581	TRPM3, MCOLN3, TRPC5, CACNG7, GRIN2A, RYR1, PKD1, RYR2, CACNA1E, TRPV6, ITPR3, PKD1L1, CACNA1A, PKD1L2	GO:0051209~release of sequestered calcium ion into cytosol	9	0.0240341	IBTK, PTPRC, CHERP, TRPA1, PKD2, RYR1, HTR1D, ITPR1, HTR1E	GO:0016459~myosin complex	5	0.00757816	MYO7B, MYO15A, MYH11, MYH7, MYO9A
GO:0043044~ATP-dependent chromatin remodeling	7	0.0263164	SMARCAD1, RBBP4, HDAC1, SMARCC1, ARID1A, CHD4, SMARCA4	GO:0006367~transcription initiation from RNA polymerase II promoter	22	0.0246114	TAF1, AR, ZNF45, TRIM28, NR3C2, ESR1, MED12, MED24, TEAD2, MED13, GTF2B, PPARGC1A, POLR2B, NOTCH3, PGR, GTF2E2, NR1I3, MAZ, HNF4A, MED15, NCOA6, RARB	GO:0050953~sensory perception of light stimulus	3	0.00866842	ADGRV1, USH2A, CDH23
GO:0015271~outward rectifier potassium channel activity	4	0.0274475	KCNA2, KCNA3, KCNQ1, KCNK2	GO:0005216~ion channel activity	9	0.0274982	KCNU1, SCN1A, TRPM7, TRPA1, CACNA1G, SCN8A, ITPR1, CACNA1A, GJC1	GO:0042383~sarcolemma	6	0.0105711	ANK2, RYR1, RYR2, SCN5A, AHNAK, SNTG2
GO:0000980~RNA polymerase II distal enhancer sequence-specific DNA binding	13	0.0310748	RBBP4, MED12, SIX3, SPI1, ZBTB16, ATF2, HDAC1, SFPQ, JUN, SMARCC1, CHD4, SMARCA4, NFATC1	GO:0008076~voltage-gated potassium channel complex	14	0.0328675	KCNH1, KCNC1, KCND3, KCNC4, KCNB1, AKAP9, KCNK2, KCNU1, KCNQ5, ABCC9, KCNT1, KCNE2, KCNQ2, KCNQ1	GO:0007219~Notch signaling pathway	7	0.0108893	DTX4, NOTCH3, FAT4, CNTN6, FOXA1, CREBBP, CNTN1
hsa04152:AMPK signaling pathway	21	0.0339072	CPT1C, PIK3CG, PFKFB4, PPP2R5A, PFKFB1, PIK3CD, PPP2R5C, PRKAG2, RPS6KB2, RPTOR, IGF1R, PPP2CB, TSC2, GYS1, PIK3CA, MTOR, PRKAA2, CCNA1, AKT3, PIK3R1, PIK3R2	GO:0015705~iodide transport	3	0.0408754	TG, SLC5A5, ANO1	GO:0007626~locomotory behavior	6	0.0115732	ADORA2A, MYO15A, LRRTM1, PTEN, CDH23, CACNA1B
GO:0046034~ATP metabolic process	8	0.042066	MYH3, AK2, NADK, MYH7, MYH6, AMPD2, MYH8, HSPA8	GO:0008209~androgen metabolic process	5	0.0455759	TIPARP, ESR1, PPARGC1A, SHH, CYP19A1	GO:0007417~central nervous system development	7	0.0132338	CHD7, ADORA2A, CNTN6, PAX6, AHI1, PTEN, SNTG2
GO:0005096~GTPase activator activity	39	0.0424624	RAP1GAP, TBC1D3I, RALGAPB, ASAP1, ARHGAP36, ARHGAP15, OCRL, LLGL2, ALDH1A1, GARNL3, DOCK2, SMAP2, TBC1D17, ARHGAP20, GMIP, TBC1D7, ERRFI1, INPP5B, ADGRB3, ARHGEF10L, ALS2CL, ARHGAP9, PIK3R2, DEPDC7, VAV3, RALBP1, ARHGEF19, NCKAP1L, DEPDC1, ARHGAP25, RIC8A, ADPRH, ARHGAP30, RALGAPA2, RGS3, JUN, TSC2, RGS6, RIN3	GO:0008331~high voltage-gated calcium channel activity	4	0.0474866	CACNA1E, CACNA1D, CACNA1S, CACNA1A	GO:0005515~protein binding	156	0.0139285	CTNNAL1, BMP10, RP1, VPS54, KPRP, UBQLN4, BBOX1, CUL3, KIF13A, RAD21, ANK2, DIRAS3, FAP, SAP30L, PUM2, DISC1, STAG1, CDH23, SYK, CARS, PCID2, STMN2, MYH7, CD40, PTPRN, BCL2L13, RPH3A, TRIM37, RFC3, TNS1, UNC13D, KRT15, ZWINT, RYR1, RYR2, AKAP7, MVK, SNRPC, SPTB, NEU4, ITGAL, GNAI2, ADORA2A, ERBB2, MYO9A, EPHB1, GCKR, MIA3, TRO, ZAP70, FBXO5, KBTBD7, SLC30A2, TNKS, TRAF5, C11ORF57, SPOP, ARHGDIB, …
GO:0060070~canonical Wnt signaling pathway	15	0.0451313	DVL3, KDM6A, PTK7, MED12, NR4A2, PTPRU, MYH6, FZD4, PTEN, ZNRF3, CTNNB1, WNT4, RYR2, BCL9L, APC	GO:0005516~calmodulin binding	24	0.0541413	KCNH1, TRPM4, OBSCN, SLC8A1, NOS1, MYO3A, MYH1, PCNT, MYH2, MYH4, MYO9B, SYT7, TTN, DAPK1, ATP2B2, PCP4, MYO15A, EEF2K, MYH11, RYR1, CAMK2D, CNN1, CAMK2A, KCNQ1	GO:0007156~homophilic cell adhesion via plasma membrane adhesion molecules	8	0.0143329	DCHS2, FAT3, FAT4, TRO, PCDHB1, PCDHGC5, PCDHA10, CDH23
GO:0005248~voltage-gated sodium channel activity	6	0.0472486	HCN1, CATSPER4, SCN2A, SCN11A, SCN7A, SCN4A	GO:0034704~calcium channel complex	6	0.0546044	TRPC4, CAMK2D, RYR1, AKAP6, ASPH, PKD2L1	hsa04064:NF-kappa B signaling pathway	6	0.0144039	LTBR, ZAP70, CD40, TRAF5, TAB2, SYK
GO:0006816~calcium ion transport	14	0.04745	CYSLTR1, CACHD1, TRPC5, CCR1, CACNG7, ITPR2, ATP2B2, RYR3, ATP2A1, RYR1, RYR2, TRPV6, NALCN, CACNA1A	GO:0006893~Golgi to plasma membrane transport	5	0.0555984	OSBPL5, ARFGEF2, LLGL1, DNM2, EXOC1	GO:0019901~protein kinase binding	13	0.0152197	PRKCZ, ANK2, AP1B1, EEF1A2, TP53, PAX6, FBXO5, AKAP7, JAK2, PTEN, CENPJ, SCN5A, SYK
GO:0006810~transport	47	0.049449	ABCA8, NUP98, GNAI3, AQP9, SLC9A5, SLC15A1, RBP1, SORL1, CLCNKA, CLCNKB, CNGB1, ABCA4, STAU2, GJA3, ATP2B2, GRIN2B, CCT8L2, MTCH2, SEC22A, SLC35F4, SLC30A3, CHRNA6, SLC4A3, AP2M1, LCN15, MLC1, CLCA4, RALBP1, ABCB11, SLC12A5, GRIN2A, SLC6A14, ABCB1, GRIA4, ASIC1, HERC1, DBI, ABCG1, BICD1, ITPR2, SLC6A9, P2RX1, SLC6A6, CACNA1E, PAEP, RSC1A1, CHRNG	GO:0005231~excitatory extracellular ligand-gated ion channel activity	3	0.0614121	GRIA2, GRIA1, GRIA4	GO:0060997~dendritic spine morphogenesis	3	0.0153936	SHANK1, PTEN, EPHB1
GO:0046426~negative regulation of JAK-STAT cascade	9	0.0496836	FLRT3, PODN, LRRTM3, LRRTM1, HGS, LEPROT, DCN, SOCS5, LRRC15	GO:0008273~calcium, potassium:sodium antiporter activity	3	0.0614121	SLC24A3, SLC24A1, SLC24A5	GO:0031000~response to caffeine	3	0.0153936	ADORA2A, RYR1, RYR2
GO:0008076~voltage-gated potassium channel complex	15	0.0531197	KCNJ16, KCNC1, KCNAB2, KCNA2, KCNA1, KCNA3, KCNA7, KCNK2, KCNT2, KCNJ8, DLG4, KCNQ1, KCNG1, DLG2, KCNH4	GO:0030521~androgen receptor signaling pathway	8	0.0634701	AR, NR1I3, MED12, MED24, ARID1A, MED13, PPARGC1A, CTNNB1	GO:0008270~zinc ion binding	29	0.0154274	SEC24B, APOBEC4, MMP27, ALPP, RNF213, BBOX1, MYCBP2, ZNF146, TNKS, TRAF5, DTX4, PTGR1, ZMYM3, CREBBP, TP53, GALT, NR4A1, PAPLN, RPH3A, HLTF, TAB2, ZFP37, TRIM37, VAT1L, ZFHX4, LVRN, ZFPM2, SNRPC, ZFHX3
GO:0005225~volume-sensitive anion channel activity	3	0.0547741	LRRC8A, LRRC8C, LRRC8D	GO:0019373~epoxygenase P450 pathway	5	0.0667036	CYP1A1, CYP2B6, CYP2C9, CYP2C8, CYP4F12	GO:0016324~apical plasma membrane	11	0.0162346	PRKCZ, ANK2, SHROOM4, ERBB2, DUOX1, SIPA1L3, AKAP7, LRP2, PTEN, USH2A, SLC5A12
GO:0048763~calcium-induced calcium release activity	3	0.0547741	RYR3, RYR1, RYR2	hsa05215:Prostate cancer	13	0.0686998	PIK3CG, MAPK1, IGF1R, AR, ATF4, BRAF, SOS1, TP53, PIK3CA, LEF1, PIK3R3, CTNNB1, INSRR	GO:0045494~photoreceptor cell maintenance	4	0.0172032	RP1, ADGRV1, USH2A, CDH23
GO:0007268~chemical synaptic transmission	34	0.0556129	DRD5, NPY2R, KCNA1, LPAR3, PCDHB11, CTNNB1, GAD2, GRIN2B, SLC1A6, DLG4, CHRNA6, AGRN, HTR1D, GAD1, LRFN4, DLG2, HTR1E, SLC12A6, DLGAP1, PTPRF, KIF5A, SLC6A11, SLC12A5, ASIC2, GRIN2A, BSN, GRIA4, GRM1, NPY5R, SSTR4, GRIA1, MYCBPAP, CACNA1E, OPRD1	GO:0042446~hormone biosynthetic process	4	0.0812822	TG, DIO3, DUOX2, CHST8	GO:0007512~adult heart development	3	0.0180006	BMP10, CHD7, MYH7
GO:0000993~RNA polymerase II core binding	6	0.0569642	PCF11, ZNF326, AGO1, CDC73, C14ORF166, SMYD2	GO:0045202~synapse	22	0.0844944	NMNAT2, NOS1, C4B, GABRB2, CRTC1, SDK1, MME, CACNB4, RPH3A, ATP2B2, PFN1, NDE1, DACT1, TMEM57, ADGRV1, VAMP7, SLC4A7, SEMA4B, CYFIP1, NSMF, ERC1, DSCAM	GO:0034236~protein kinase A catalytic subunit binding	3	0.0194493	PRKAR1B, PRKAR1A, RYR2
hsa04668:TNF signaling pathway	18	0.0576129	CXCL1, PIK3CG, CFLAR, CEBPB, MMP9, MAP2K3, CSF1, PIK3CD, MAP2K4, ATF2, VCAM1, NOD2, JUN, RIPK3, PIK3CA, AKT3, PIK3R1, PIK3R2	GO:0005248~voltage-gated sodium channel activity	5	0.0857752	SCN1A, PKD2, SCN8A, HCN4, SCN10A	GO:0003774~motor activity	5	0.0195288	MYO7B, MYO15A, MYH11, MYH7, MYO9A
hsa04660:T cell receptor signaling pathway	17	0.0608426	PIK3CG, PTPRC, ITK, VAV3, NFKBIE, CD8B, PIK3CD, PAK6, KRAS, JUN, RHOA, PIK3CA, NFATC2, AKT3, PIK3R1, PIK3R2, NFATC1	GO:0043410~positive regulation of MAPK cascade	12	0.0953939	GRM4, AR, FLT1, FLT3, ADRA1B, ADRA1A, IGF2, TRAF7, KSR1, TNFRSF4, GPR37L1, CTNNB1	GO:0045579~positive regulation of B cell differentiation	3	0.0207797	PCID2, ZAP70, SYK
GO:0060076~excitatory synapse	6	0.0616105	SLC17A8, SYNDIG1, LRRTM1, DLG4, BSN, DGKI	GO:0007156~homophilic cell adhesion via plasma membrane adhesion molecules	43	3.68948e-11	PCDHA6, PCDHA7, PCDHA8, ME3, PCDHA9, PCDHGA9, CLSTN1, PCDHA5, PCDHGA8, PCDHGC5, CDH1, PCDHB12, PCDHGA2, DCHS1, CDH5, PCDHGA1, PCDHAC1, CDH8, FAT3, FAT4, ROBO1, PCDHB16, PKD1, PCDHA10, PCDHA12, PCDHA13, DSCAM, CDH23, PCDHB7, PCDHB6, PCDH11X, CDHR1, PCDH10, SDK1, PCDHB1, PCDH12, CELSR1, PCDH17, AMIGO2, CDH16, TENM3, DSG1, CDH11	GO:0030315~T-tubule	4	0.0211395	ANK2, RYR1, SCN5A, AHNAK
GO:0070588~calcium ion transmembrane transport	19	0.0645527	SLC8A3, TRPM3, TRPC5, CACNG7, GRIN2A, ASIC1, PKD1L1, PKD1L2, ATP2B2, CATSPER4, MCOLN3, RYR3, ATP2A1, CATSPER1, PKD1, CACNA1E, TRPV6, NALCN, CACNA1A	GO:0005886~plasma membrane	450	2.07929e-10	SLC9A5, CTNNB1, MAGED1, GRIN2B, ADAM2, PIK3CA, HTR1D, STAG2, HTR1E, CDH23, PIK3CG, ARC, CLCA1, TTC7A, BRAF, C4B, CDHR1, GRIN2A, PTPRR, LIG4, PTPRO, SIRPA, PPP1CA, F5, RYR1, TFPI, ROR2, SLC9C2, TMPRSS11B, SLC30A10, HLA-DRA, SCN1A, EMCN, RALGPS1, GNAI1, CRTC1, RUNDC3A, CACNB4, DAAM1, KLKB1, ZAP70, AHNAK2, SGIP1, TGFBR1, PCDH10, PPFIBP1, PCDH12, PCDH17, KCNK2, VDAC1, OR56A3, OR56A1, TMEM119, GPR83, …	GO:0031235~intrinsic component of the cytoplasmic side of the plasma membrane	3	0.0222294	NPHS2, SPTA1, SPTB
GO:0098641~cadherin binding involved in cell-cell adhesion	39	0.0683919	SNX5, CHMP4B, PDLIM5, WASF2, EIF5, CTNND1, ASAP1, CAPZB, PRDX1, VCL, CTNNB1, EFHD2, PAK6, ATXN2L, MACF1, SH3GLB1, ATIC, PPL, HSPA8, AHNAK, PLEC, GOLGA2, ENO1, EGFR, DOCK9, PKN2, PI4KA, LYPLA2, GLOD4, MYH9, EPHA2, MARK2, DDX6, SCYL1, FNBP1L, EIF4H, CCT8, RUVBL1, YKT6	GO:0007155~cell adhesion	74	3.95123e-07	NRP2, PCDHA6, PCDHA7, PCDHA8, MYBPC2, PCDHA5, CLSTN1, POSTN, EDIL3, CTNNB1, SRPX, ROBO1, ADAM2, DSCAM, SPECC1L, ADGRE2, CNTNAP5, CNTN6, INPPL1, PCDHB6, ICAM2, IZUMO1R, ICAM3, CERCAM, SIRPA, LAMC3, VCAN, RELN, CNTN3, LAMC1, COL1A1, MFAP4, ADAM12, DST, OLFM4, TNC, ITGAE, PCDHB12, SIGLEC9, SCARF1, CDH5, ITGAM, APLP1, PCDHAC1, ALCAM, CDH8, ISLR, LAMB4, COL7A1, ITGAX, COL6A6, COMP, PCDHA10, SPAM1, APB…	GO:0086005~ventricular cardiac muscle cell action potential	3	0.0237245	ANK2, RYR2, SCN5A
GO:0000122~negative regulation of transcription from RNA polymerase II promoter	88	0.0690319	ZNF536, DICER1, SPI1, PAX6, PAX5, CNOT1, ZEB2, TGFB1, YBX1, CTNNB1, MEN1, CUL3, KDM1A, ZNF683, PEX2, HEY2, H2AFY, RARB, TPR, KDM5A, ZFP36, SATB2, TBX15, RELB, TP53, ZNF649, TLE4, ARID1A, TLE1, SPEN, MBD1, PKIA, NRIP1, HOXD9, HHEX, HOXD8, EP300, TRIM33, ETV3L, TGIF2, TBX18, ZNF382, SMARCA4, PEG3, TSHZ1, MTDH, DRD3, USP9X, TFCP2L1, GLIS1, CDC73, SOX6, ZBTB16, PRDM16, ATF2, AHRR, SORBS3, NR1D1, ATN1…	GO:0005578~proteinaceous extracellular matrix	47	2.75024e-06	GLG1, LTBP1, ADAMTS19, LTBP2, GLDN, KERA, ADAMTS14, WNT3A, MMP9, ADAMTS16, CD248, LTBP4, NPNT, ADAMTS15, POSTN, VIT, SHH, TGFB1, COL9A2, COL6A6, COMP, IMPG2, ADAMTS10, FBN3, ADAMTS12, COL4A4, ZP1, MMP19, FBN1, MMP16, PAPLN, SPARC, EMILIN2, SLIT1, COL5A1, EMILIN1, VWF, ADAMTS6, ADAMTS9, ADAMTS8, COL19A1, LAMC3, FBLN5, TGFBR3, VCAN, RELN, ADAMTS3	GO:0006418~tRNA aminoacylation for protein translation	4	0.0264749	CARS, CARS2, QARS, IARS2
GO:0060078~regulation of postsynaptic membrane potential	6	0.0701195	HCN1, CATSPER4, SCN2A, SCN11A, SCN7A, SCN4A	GO:0008066~glutamate receptor activity	8	8.01029e-06	GRM4, GRM3, GRIA1, GRM8, GRM7, GRIK3, GRM6, GRM1	GO:0051091~positive regulation of sequence-specific DNA binding transcription factor activity	6	0.0276459	TRIM37, TP53BP1, FOXA1, JAK2, TRAF5, PTEN
GO:0035725~sodium ion transmembrane transport	13	0.0711164	HCN1, SLC8A3, SHROOM2, ABCB11, SCN2A, ASIC2, ASIC1, SLC34A2, CATSPER4, SCN11A, NALCN, SCN7A, SCN4A	GO:0005524~ATP binding	174	1.6336e-05	ADCY8, ADCY6, INO80, CLK1, CCT3, IARS2, TTN, KIF13A, ATP2B2, DDX17, OPLAH, MAP3K9, DHX34, DYNC2H1, PIK3CA, DHX30, MAP2K7, HFM1, PIK3CG, CIITA, NWD1, NMNAT2, TNIK, BRAF, MYH1, MYO3A, KIF5C, MYH2, WNK1, MYH4, WNK3, LIG4, SCYL3, MARK4, MAPK1, ATP2C2, RFC1, RFK, NAV2, BMP2K, SMARCA5, ROR2, LRRK2, SMARCA1, EIF2AK3, EP400, KIF26B, PPP5C, DNAH11, DNAH17, BMPR2, CTPS2, MYO9B, ABCA1, ABCA4, ACSBG1, CMPK2,…	GO:0005200~structural constituent of cytoskeleton	6	0.0288663	GFAP, ANK2, KRT15, EPB41L4B, SPTA1, SPTB
GO:0030177~positive regulation of Wnt signaling pathway	8	0.0729027	HHEX, ATP6V1C2, SULF2, MACF1, SALL1, CDC73, FZD4, SMARCA4	GO:0007492~endoderm development	10	3.31164e-05	ARC, BPTF, EPB41L5, GATA4, SMAD4, MED12, KIF16B, LAMC1, EXT1, TGFB1	GO:0004817~cysteine-tRNA ligase activity	2	0.0309175	CARS, CARS2
GO:0060292~long term synaptic depression	5	0.0758512	ARF1, GRIA1, DRD5, PTEN, SHANK3	GO:0005887~integral component of plasma membrane	161	6.33173e-05	GABRB2, PLXNA2, GRIK3, SLC6A3, CSPG4, LPAR3, SLC7A5, IL17RA, ATP2B2, PTGIR, GRIN2B, ROBO1, MRGPRX2, ADAM2, SLC2A1, SLC4A2, SLC4A1, HTR1D, FRS2, HTR1E, DSCAM, SLC12A6, SLC12A7, CLCA1, PLXNB1, CDHR1, TRPA1, GRIN2A, PTPRO, CNGA4, CNGA1, TRAT1, CLEC4M, CCR9, NPC1, ATP2C2, GPR55, LRP12, RYR1, ROR2, TMPRSS11B, HLA-DRA, SYNDIG1, ENPP3, BMPR2, MME, BDKRB1, ABCA1, ABCA4, PCDHAC1, ALCAM, SYPL1, CNR1, TEK, …	GO:0035556~intracellular signal transduction	13	0.0311175	PRKCZ, RP1, GNAI2, MYO9A, TNS1, KSR2, PRKAR1A, ZAP70, ASB1, SH2B3, AKAP7, JAK2, SYK
GO:0042626~ATPase activity, coupled to transmembrane movement of substances	9	0.0760929	ABCA8, ABCA7, ABCA9, ABCB11, TAP1, ABCD2, ABCB1, ABCA4, ABCA13	GO:0030198~extracellular matrix organization	35	8.87182e-05	WNT3A, ITGAE, NPNT, TNC, POSTN, CDH1, VIT, SOX9, ITGAM, COL9A2, COL7A1, ITGAX, FGB, COL27A1, COMP, COL4A4, ICAM2, ICAM3, FBN1, HSPG2, SPARC, COL5A3, FURIN, COL5A1, EMILIN1, VWF, ITGA9, LAMA4, LAMA3, COL19A1, LAMC3, FBLN5, VCAN, COL1A1, LAMC1	GO:0086043~bundle of His cell action potential	2	0.0320178	SCN5A, SCN10A
hsa04725:Cholinergic synapse	18	0.0762554	PIK3CG, GNAI3, GNAI2, ADCY8, PIK3CD, ITPR3, ITPR2, PLCB4, KRAS, PIK3CA, PRKACA, CHRNA6, KCNQ1, CACNA1A, CHAT, AKT3, PIK3R1, PIK3R2	hsa04713:Circadian entrainment	21	0.000113395	NOS1, ADCY8, GNAI1, ADCY6, GRIN2A, GRIA4, ITPR1, RPS6KA5, MAPK1, GRIN2B, GRIA2, GNB1, GRIA1, CACNA1G, RYR1, CAMK2D, GUCY1A2, PER1, ADCY10, CACNA1D, CAMK2A	GO:0043366~beta selection	2	0.0320178	ZAP70, SYK
GO:0030178~negative regulation of Wnt signaling pathway	10	0.0842728	LRP1, CSNK1E, NLK, TSC2, SIX3, MED12, TLE1, ZNRF3, NFATC1, APC	GO:0003777~microtubule motor activity	19	0.000113606	DNAH11, DNAH17, KIF5C, DNAH3, DNHD1, CENPE, DNAH1, KIF16B, DNAH8, DNAH5, DNAH6, KIF1C, KIF13A, DYNC2H1, KIF19, APPBP2, KIF21A, KIF26B, KIF2A	GO:0098907~regulation of SA node cell action potential	2	0.0320178	ANK2, RYR2
hsa04115:p53 signaling pathway	12	0.093345	RFWD2, CASP9, TSC2, TP53, ATR, PERP, ADGRB1, SESN2, IGFBP3, PTEN, ATM, TP73	hsa04724:Glutamatergic synapse	23	0.000202111	ADCY8, GNAI1, GRIK3, ADCY6, GRIN2A, GRIA4, SHANK1, GRM1, SHANK2, ITPR1, GRM4, MAPK1, GRM3, GRIN2B, GRIA2, GNB1, GRM8, GRIA1, GRM7, SLC1A6, GRM6, CACNA1D, CACNA1A	GO:0006423~cysteinyl-tRNA aminoacylation	2	0.0320178	CARS, CARS2
GO:0007205~protein kinase C-activating G-protein coupled receptor signaling pathway	7	0.0949674	DGKA, LRP1, DGKK, BDKRB1, DGKI, GRM1, GAP43	GO:0004222~metalloendopeptidase activity	23	0.000204152	ADAM28, UQCRC2, CLCA1, ADAMTS19, ADAMTS14, ADAMTS16, MMP9, MMP19, ADAMTS15, MME, MMP16, PAPLN, AFG3L2, ADAMTS6, ADAMTS9, ADAMTS8, ADAM2, ADAMTS10, ADAM30, ADAMTS12, ADAMTS3, ADAM12, ADAMDEC1	GO:0001574~ganglioside biosynthetic process	3	0.0334942	ST3GAL1, ST8SIA4, ST8SIA3
GO:0051924~regulation of calcium ion transport	6	0.0954931	ANK2, GNAI2, P2RX1, CATSPER1, RCVRN, OPRD1	GO:0030315~T-tubule	12	0.000211515	CAV3, SLC8A1, SCN1A, NOS1, CAMK2D, RYR1, ADRA1A, AHNAK2, AKAP6, ATP1A2, CACNA1S, AHNAK	GO:2000249~regulation of actin cytoskeleton reorganization	3	0.0334942	SEMA3E, CSF1R, ARHGDIB
GO:0005509~calcium ion binding	116	1.11349e-06	S100A3, HRNR, LTBP1, AIF1, FSTL4, DLK2, SYT6, EDIL3, DYSF, PLS1, RAPGEF2, TBC1D9B, PCDHGA10, SCUBE3, CDHR2, STIM2, DLL1, ACTN2, LETM1, EGFLAM, ME1, SRI, MYL1, DAG1, PCDHAC2, CALU, PCDHA10, HEG1, PCDHA11, EGF, PCDHA13, GPD2, S100A16, BMP1, DMP1, CELSR3, S100A14, P4HTM, PCDH18, SLC25A12, NOTCH2, CBLB, SLC25A13, EFHB, NOTCH4, SYT14, SYTL3, TLL1, PCDHA6, PCDHA8, CLSTN2, PCDHA2, REG4, PCDHA4, NPNT, PC…	hsa04512:ECM-receptor interaction	19	0.00031018	COL4A4, TNC, HSPG2, COL5A3, COL5A1, ITGA9, LAMB4, VWF, LAMA4, LAMA3, COL6A6, LAMC3, COMP, COL27A1, RELN, SV2B, COL1A1, LAMC1, SV2C	GO:0008134~transcription factor binding	10	0.0343138	MSX2, USP7, HTT, FOXA1, CREBBP, TP53, PAX6, ZFPM2, PTPRN, NCOR2
GO:0005524~ATP binding	208	5.08783e-06	TARS2, ADCY2, ADCY5, CCT3, ATP2B4, DDX18, MAP3K4, CUL9, ABCB10, DHX36, TLK1, DHX30, ROS1, KIF13B, MAGI3, MAGI1, ROCK2, OLA1, ABCC10, NME7, DHX29, RFC1, CAMK4, BAZ1B, CAMK1, MST1R, NEK4, NEK1, STK17B, UBA6, WARS2, PXK, EPHB3, UHMK1, EPHB1, SGK223, MOV10, EPHB6, ZAP70, DHX57, KIF3A, DDX1, TRIO, EPRS, DALRD3, YTHDC2, EPHA1, ABCG2, KDR, EPHA5, EPHA4, EPHA7, EPHA6, NTRK1, GRK6, TNK2, ABCF1, HELQ, MYO7…	GO:0005856~cytoskeleton	52	0.000368013	UTRN, WASF2, CCT3, SYNJ2, ADCY10, TNIK, INPPL1, ENC1, FLNC, BICD1, EPB41L2, TYK2, EPB41L3, MAPK1, EVPL, DEF6, KRT16, KRIT1, EPB41L5, SGCD, DST, FHOD1, SHROOM3, SSH3, SSH2, EPB41L4A, AKAP12, AKAP9, APBB1IP, LLGL1, ARHGAP39, FAM65B, PFN1, MACF1, MYO15A, TEK, DRC7, CNN1, FGD5, PLEC, ACTB, NOS1, PTPN3, EPPK1, COTL1, RAPH1, SYNE1, NR1I3, UACA, TENM1, GAS2L2, SNX31	GO:0030018~Z disc	6	0.0374791	BMP10, ANK2, RYR1, RYR2, MYH7, SCN5A
GO:0007411~axon guidance	33	0.000222961	WNT5A, NRP2, EPHB3, GLI3, EPHB1, TGFB2, RANBP9, LAMB2, ROBO1, CRMP1, SEMA3F, SOS1, GBX2, SEMA3C, UNC5C, BOC, GPC1, CSF1R, RYK, NFASC, DPYSL2, SLIT2, LAMA2, FEZF1, EPHA5, SEMA6A, ISPD, TENM2, NTRK1, SPTBN1, CNTN4, APBB2, CHL1	GO:0005874~microtubule	45	0.000484687	DNAH11, RP1, SHROOM3, EHHADH, DNAH17, HAUS1, SYNJ1, RP1L1, DNAH3, INO80, DNAH1, CCT3, DNAH8, DNAH5, DNAH6, KIF13A, NDE1, MACF1, DYNC2H1, TUBB8, APPBP2, KIF21A, TUBB4A, KIF2A, JAKMIP1, DNM3, SLC8A1, TCP1, DNM1L, PCNT, KIF5C, CENPE, KIF16B, RACGAP1, MARK4, KIF1C, CSPP1, RASSF5, TBCD, KRIT1, CFAP20, KIF19, KIF26B, MAP3K11, DNM2	GO:0018108~peptidyl-tyrosine phosphorylation	7	0.0379297	EPHA7, ERBB2, ZAP70, JAK2, EPHB1, CSF2RA, CSF1R
GO:0005246~calcium channel regulator activity	10	0.0011193	SRI, SGK1, GRM3, GRM2, GNB2, GRM7, PLN, STIM2, TMEM110, CACNA2D3	GO:0007018~microtubule-based movement	18	0.000557072	DNAH17, KIF5C, DNAH3, KTN1, DNHD1, CENPE, KIF16B, RACGAP1, DNAH8, DNAH5, DNAH6, KIF1C, KIF13A, DYNC2H1, KIF19, KIF21A, KIF26B, KIF2A	GO:0030425~dendrite	11	0.0381764	EPHA7, GNAI2, ADORA2A, HTT, ZWINT, GABRB1, OR10J5, OR10H5, SHANK1, EPHB1, CACNA1B
GO:0007416~synapse assembly	16	0.00129155	WNT5A, PCDHB5, RYK, PCDHB4, FZD1, SDK1, PCDHB2, PCDHB14, PCDHB13, FZD5, NRCAM, DNER, GNPAT, NRG1, WNT7A, ADGRL3	GO:0045893~positive regulation of transcription, DNA-templated	68	0.000683407	HNF1A, ELF4, WNT3A, ARNT2, MED24, CTCF, SHH, TGFB1, CTNNB1, MAGED1, BRPF1, GATA4, ASPH, RBPJL, DNAJC2, CIITA, AR, PCID2, TP53, ESR1, MED12, LEF1, FOXN2, ARID1A, TOPORS, MED13, HMGA2, PPARGC1A, MAPK1, INHBA, RFC1, BPTF, HNF4A, NCOA6, SMARCA5, ROR2, FOXC1, NFE2L1, COL1A1, SMARCA1, ZNF516, KMT2A, TADA3, CTCFL, SOX7, CDH1, SOX9, NPAT, ARNTL2, NOS1, TGFBR1, PSRC1, TRIM28, SMAD4, BRCA2, ILF3, FZD2, FZD…	GO:0030506~ankyrin binding	3	0.0382047	KCNQ2, SCN5A, SPTB
GO:0030424~axon	38	0.00154618	NRP2, ALS2, COBL, SLC6A1, CADM2, TAC1, DTNBP1, UHMK1, EPHB1, IL31RA, TGFB2, ROBO1, CNR1, CNTNAP2, ADCY10, KIF21B, PRSS12, DISC1, KIF13B, PTPRK, GPER1, HOMER1, PALLD, RUFY3, CTNNA2, EPHA5, EPHA4, SEMA6A, GRM3, GRM2, NTRK1, GRM7, TENM3, CNTN4, ADAM22, SMURF1, SLC5A7, ADGRL3	GO:0021915~neural tube development	10	0.000781228	STIL, DACT1, PLXNA2, PLOD3, PKD2, PKD1, CECR2, DCHS1, TGFB1, EPHA2	GO:2000463~positive regulation of excitatory postsynaptic potential	3	0.0407296	PRKCZ, SHANK1, PTEN
GO:0051966~regulation of synaptic transmission, glutamatergic	9	0.0016756	MEF2C, GRM3, GRM2, SERPINE2, GRM8, GRM7, CNR1, GRM6, KALRN	GO:0005604~basement membrane	17	0.000801629	LAD1, NPNT, TNC, FBN1, HSPG2, SPARC, COL5A1, APLP1, LAMB4, LAMA4, HMCN1, LAMA3, COL7A1, LAMC3, LAMC1, DST, USH2A	hsa04330:Notch signaling pathway	4	0.0447298	DTX4, NOTCH3, CREBBP, NCOR2
GO:0017137~Rab GTPase binding	26	0.00260647	ALS2, RAB3GAP2, TBC1D8, MLPH, RAB3GAP1, VPS52, RABGAP1L, RIMS1, STXBP5L, PIFO, RBSN, TBC1D14, TBC1D5, NPC1L1, MICAL1, TBC1D1, RHOBTB3, TBC1D9B, MICALL2, KIF3A, HACE1, TBCK, DENND1B, STXBP5, ACAP2, SYTL3	GO:0030506~ankyrin binding	8	0.000944358	OBSCN, SLC8A1, CDH1, SLC4A1, FLNC, KCNQ2, CACNA1D, PLEC	GO:0007601~visual perception	8	0.0448536	RP1, HMCN1, ADGRV1, SLC24A1, PAX6, MYO9A, USH2A, CDH23
GO:0005096~GTPase activator activity	45	0.00311418	DLC1, RAB3GAP2, TBC1D8, AGFG1, RAB3GAP1, RABGAP1L, ARHGAP18, TBC1D19, FAM13B, STXBP5L, RASAL2, TAGAP, SMAP1, RGS12, RASGRP3, TIAM2, TBC1D14, SOS1, TBC1D5, DEPDC1B, TBC1D1, RAPGEF2, RASA1, ELMOD2, RASA2, TBC1D9B, SRGAP2C, RAP1GDS1, SIPA1L2, ARHGAP24, ECT2, TBCK, ARHGAP26, RGS13, DOCK4, ARHGEF11, ARHGAP31, STXBP5, RGS5, ACAP2, RGS7, ARAP3, SYNGAP1, KALRN, ARHGAP10	GO:0005085~guanyl-nucleotide exchange factor activity	22	0.000976787	LAMTOR5, OBSCN, RALGPS1, AKAP13, ARHGEF17, DOCK7, DOCK8, ARFGEF2, EIF2B1, VAV1, RALGDS, DOCK4, PREB, DIS3, PLCE1, PTGIR, GBF1, TIAM2, SOS1, RAPGEF4, FGD5, RAPGEF1	GO:0015293~symporter activity	4	0.0450299	SLC1A5, SLC12A8, SLC24A1, SLC5A12
GO:0007196~adenylate cyclase-inhibiting G-protein coupled glutamate receptor signaling pathway	5	0.00326389	GRM3, GRM2, GRM8, GRM7, GRM6	hsa04730:Long-term depression	14	0.00132751	GNA13, PPP2R1A, NOS1, BRAF, GNAI1, GRM1, ITPR1, MAPK1, IGF1R, GRIA2, GRIA1, RYR1, GUCY1A2, CACNA1A	GO:0000973~posttranscriptional tethering of RNA polymerase II gene DNA at nuclear periphery	2	0.0476415	PCID2, NUP107
GO:0043547~positive regulation of GTPase activity	79	0.00716699	ALS2, DLC1, RAB3GAP2, PDGFA, RAB3GAP1, EZH2, ARHGAP18, FGF10, TBC1D19, GDNF, RGL1, STXBP5L, SMAP1, TIAM2, FRS3, DEPDC1B, NRG1, RAPGEF2, FGF2, ARHGEF4, ARHGEF2, ARHGEF5, SIPA1L2, RAP1GDS1, PSD4, ACTN2, PSD2, ARHGAP24, IRS1, ECT2, ARHGAP26, ELMO1, FARP2, ARHGEF11, ARHGAP31, NCK2, RASGRF2, ARFGEF3, STXBP5, ACAP2, SNX13, KALRN, FGFR3, ARHGEF26, AGFG1, AKAP9, DENND2A, CYTH3, FAM13B, RASAL2, MCF2L2, TA…	GO:0019838~growth factor binding	9	0.00142325	NRP2, ACVR2A, FLT1, DUSP1, LTBP2, IL6ST, TGFBR1, TEK, BMPR2	GO:0098910~regulation of atrial cardiac muscle cell action potential	2	0.0476415	ANK2, RYR2
GO:0001102~RNA polymerase II activating transcription factor binding	10	0.0137381	T, EXOSC9, TBX20, HIPK2, NEUROD1, NHLH2, BHLHE40, NFE2L2, POU1F1, PITX2	GO:0030424~axon	33	0.00197345	NRP2, GRIK3, SLC6A3, DICER1, MME, LPAR3, IGF2BP1, LLGL1, TGFB1, ALCAM, TMEM57, ROBO1, CNR1, SYNJ2, LMTK3, ADCY10, DSCAM, DNM3, C4B, CRYAB, KCNB1, SACS, DOCK7, PTPRO, MAPK1, GRM3, GRM7, TENM3, FKBP15, CA2, SPTA1, LRRK2, DST	GO:0005886~plasma membrane	77	0.0554359	CTNNAL1, PHKB, SLC44A5, GABRB1, DUOX1, OR4C6, PTEN, SLC1A5, GPC5, TAAR6, LILRA1, VN1R2, DIRAS3, ANK2, FAP, SLC24A1, CNTNAP3, KCNQ2, CSF2RA, AHNAK, CDK14, SYK, CDH23, LTBR, OR5M1, CNTN6, TRPA1, PCDHB1, OR10J5, GPR132, CD40, PTPRN, RPH3A, SEMA4G, ADGRV1, LRP11, RYR1, CNTN1, RYR2, AKAP7, DCHS2, ITGAL, PRKCZ, C9, GNAI2, ADORA2A, ERBB2, PCDHGC5, ALPP, CSMD2, EPHB1, CHD9, FAT3, FAT4, TRO, GRPR, ZAP70, …
hsa04022:cGMP-PKG signaling pathway	26	0.023642	MEF2C, ADORA3, ADCY2, ADCY5, ADORA1, KCNMB2, EDNRA, KCNU1, AGTR1, ATP2B4, ATF6B, GATA4, ADRA2C, NOS3, ADRA2B, PPP3CA, SLC8A1, ROCK2, ATP1A4, PRKCE, IRS1, ITPR1, MEF2D, GTF2IRD1, PLN, MYLK	GO:0001837~epithelial to mesenchymal transition	10	0.00208048	TGFBR1, EPB41L5, TRIM28, TGFBR3, LEF1, LOXL3, HMGA2, SOX9, TGFB1, CTNNB1	GO:0004713~protein tyrosine kinase activity	6	0.0571935	EPHA7, ERBB2, ZAP70, JAK2, CSF2RA, SYK
GO:0035567~non-canonical Wnt signaling pathway	6	0.0267318	FZD9, WNT5A, RYK, FZD1, FZD5, WNT7A	GO:0046777~protein autophosphorylation	28	0.0021207	CAD, CLK1, INSRR, IGF1R, MAP3K9, TEK, EEF2K, CDK12, CAMK2D, LMTK2, CAMK2A, TAF1, TNIK, FLT1, MYO3A, FLT3, TRPM7, MEX3B, TRIM28, WNK1, WNK3, DAPK3, ATM, DAPK1, HIPK4, LRRK2, EIF2AK3, MAP3K11	GO:0051301~cell division	11	0.0584726	HAUS6, RAD21, HMCN1, GNAI2, ZWINT, FBXO5, TNKS, CENPJ, CDK14, MIS12, STAG1
GO:0015279~store-operated calcium channel activity	5	0.0288341	ORAI2, TRPC3, ZP3, TRPC7, STIM2	hsa05200:Pathways in cancer	51	0.00232294	GNA13, ADCY8, MMP9, WNT3A, ARNT2, ADCY6, LPAR3, TGFB1, SHH, CTNNB1, CUL2, SLC2A1, PIK3CA, RARB, PIK3CG, AR, ARHGEF1, BRAF, TP53, RUNX1T1, LEF1, DAPK3, DAPK1, MAPK1, LAMC3, GNB1, LAMC1, GNAI1, BDKRB1, CDH1, LAMB4, IGF1R, SOS1, PIK3R3, FZD9, COL4A4, FLT3, MSH2, TGFBR1, SMAD4, BIRC7, BRCA2, FZD2, BIRC2, FZD7, RALGDS, LAMA4, CBLB, RASSF5, LAMA3, PTCH2	GO:0000775~chromosome, centromeric region	4	0.0592333	RAD21, TNKS, MIS12, STAG1
GO:0071560~cellular response to transforming growth factor beta stimulus	11	0.0288561	WNT5A, STK16, WNT2, MEF2C, WNT10A, ARG1, ZFP36L2, HYAL2, HDAC2, WNT7A, PPARGC1A	GO:0001642~group III metabotropic glutamate receptor activity	4	0.00233885	GRM4, GRM8, GRM7, GRM6	GO:0042954~lipoprotein transporter activity	2	0.0608826	MIA3, LRP2
GO:0045162~clustering of voltage-gated sodium channels	4	0.0292331	NRCAM, SCLT1, NFASC, MYOC	GO:0015301~anion:anion antiporter activity	8	0.00237823	SLC4A10, SLC22A7, SLC22A8, SLC26A9, SLC4A8, SLC4A2, SLC4A1, SLC4A9	GO:0098574~cytoplasmic side of lysosomal membrane	2	0.0608982	GFAP, EEF1A2
GO:1902358~sulfate transmembrane transport	5	0.0300655	SLC26A3, SLC26A8, SLC26A9, SLC13A1, SLC26A2	GO:0044212~transcription regulatory region DNA binding	32	0.00241668	KMT2D, ZNF516, HNF1A, KMT2A, ARID4B, CTCFL, SOX7, CTCF, CTNNB1, KDM1A, OVOL2, GATA4, MTERF2, GFI1, CIITA, TAF1, AR, FOXA1, TP53, SMAD4, LEF1, TTF1, ATF4, HNF4A, DMTF1, PRDM5, HIVEP3, RFX3, FOXC1, ZFHX3, NCOR1, TCF12	GO:0002040~sprouting angiogenesis	3	0.0610359	E2F8, SEMA3E, RNF213
GO:0004004~ATP-dependent RNA helicase activity	13	0.0334468	SKIV2L, DDX39B, DDX1, YTHDC2, DDX56, DDX46, DDX18, DHX29, DHX15, DHX36, DDX41, DHX30, DHX57	hsa04024:cAMP signaling pathway	30	0.00257694	ADCY8, GNAI1, ADCY6, SOX9, ATP2B2, GRIN2B, CAMK2D, PIK3CA, RAPGEF4, ADCY10, HTR1D, HCN4, PIK3R3, CAMK2A, HTR1E, PIK3CG, BRAF, GRIN2A, ATP1A2, GRIA4, CACNA1S, VAV1, CNGA4, CNGA1, MAPK1, PPP1CA, PLCE1, GRIA2, GRIA1, CACNA1D	GO:0009311~oligosaccharide metabolic process	3	0.0610359	ST3GAL1, ST8SIA4, ST8SIA3
GO:0032279~asymmetric synapse	4	0.0389106	CHRM3, CHRM2, GRM7, ADORA1	GO:0006338~chromatin remodeling	17	0.00300603	HNF1A, FOXA1, ESR1, TTF1, INO80, ARID1A, TOP1MT, PADI4, SOX9, BAZ1A, CHD1L, BPTF, SMARCD2, SMARCA5, RUVBL2, SMARCA1, MYSM1	GO:0019221~cytokine-mediated signaling pathway	6	0.0612578	LRRTM1, DUOX1, JAK2, PTPRN, CSF2RA, CSF1R
GO:0046580~negative regulation of Ras protein signal transduction	7	0.0409668	STAMBP, RASAL2, TRIM67, SYNGAP1, RASA1, RASA2, TGFB2	hsa04611:Platelet activation	22	0.00302717	ACTB, GNA13, PIK3CG, ARHGEF1, ADCY8, GNAI1, ADCY6, MYL12B, COL5A3, APBB1IP, COL5A1, ITPR1, VWF, MAPK1, PTGIR, PPP1CA, FGB, COL27A1, GUCY1A2, PIK3CA, COL1A1, PIK3R3	GO:0048023~positive regulation of melanin biosynthetic process	2	0.0630141	TYRP1, ZEB2
GO:0051963~regulation of synapse assembly	4	0.0431808	MEF2C, PPP1R9A, CHRNB2, GHSR	GO:0051453~regulation of intracellular pH	10	0.00318444	SLC4A10, SLC9A5, SLC26A9, SLC4A8, SLC4A7, SLC4A2, SLC9C2, SLC4A1, SLC4A9, CA2	GO:0002283~neutrophil activation involved in immune response	2	0.0630141	ZAP70, SYK
GO:0042734~presynaptic membrane	12	0.0442547	KCNH1, GRM3, GRM2, GRM8, GRM7, GRM6, GABBR1, ERC2, GPER1, ADORA1, RIMS1, IL31RA	GO:0008237~metallopeptidase activity	16	0.00332142	ADAM28, ADAMTS19, MMP9, MME, XPNPEP3, AFG3L2, ADAMTS6, ADAMTS9, ADAMTS8, ADAM2, CPXM1, ADAMTS10, ADAM30, ADAM12, MYSM1, DPEP1	GO:0086016~AV node cell action potential	2	0.0630141	SCN5A, SCN10A
GO:0014069~postsynaptic density	27	0.0487345	RTN4, ALS2, DMTN, CLSTN2, STRN, SPOCK1, ADORA1, DTNBP1, MYD88, SOS1, DISC1, DLG1, ARHGEF2, MAGI2, DLGAP2, TANC1, GPER1, HOMER1, ITPR1, CTNNA2, EPHA4, GRM3, PPP1R9A, MAP4, SPTBN1, SYNGAP1, KALRN	GO:0019827~stem cell population maintenance	12	0.00344929	EIF4ENIF1, EIF4E, RIF1, MED12, MED24, PADI4, PAF1, SMC1A, TET1, FZD7, BMPR1A, CTNNB1	GO:0045499~chemorepellent activity	3	0.0657695	EPHA7, SEMA4G, SEMA3E
GO:0060070~canonical Wnt signaling pathway	15	0.0496852	WNT5A, FZD9, TCF7, RYK, FZD1, FZD5, TCF7L1, FZD7, WNT2, T, WNT9A, EGF, WNT7A, DISC1, BCL9	GO:0009986~cell surface	65	0.00382927	KCNH1, KCNC1, WNT3A, SLC6A3, CLSTN1, CSPG4, LY9, SHH, TGFB1, DIP2A, SRPX, GRIN2B, ROBO1, ADAM2, RC3H2, TMEM102, ISLR2, CIITA, RAMP3, CRYAB, SCUBE1, GRIN2A, MMP16, NRXN1, PKD2L1, CCR9, ACVR2A, ADAMTS9, VAMP7, ADGRV1, SLC26A9, TFPI, GPA33, PTGFRN, ADGRA2, HLA-DRA, CAV3, CPM, ADAMTS15, BMPR2, TNFRSF4, ITGAM, CDH5, DEFB110, ITGAX, FGB, TEK, PCSK9, KCNE2, PKD1, LRFN2, FZD9, PTPRC, TRPC4, TGFBR1, AXL, …	GO:0097546~ciliary base	3	0.0658102	PRKAR1B, PRKAR1A, DISC1
GO:0006820~anion transport	5	0.0513552	SLC26A3, SLC17A5, SLC26A8, SLC26A9, SLC4A2	GO:0051018~protein kinase A binding	7	0.00396858	SPHKAP, DACT1, DACT3, AKAP12, AKAP6, AKAP13, LRRK2	GO:0032420~stereocilium	3	0.0658102	MYO15A, ADGRV1, CDH23
GO:0006816~calcium ion transport	14	0.0519864	SRI, RAMP3, CACNA2D1, TRPC3, SARAF, ITPR1, CCR5, CATSPER3, PLN, PSEN2, CAMK2D, TRPV5, CHRNB2, PPP3CA	GO:0005201~extracellular matrix structural constituent	14	0.00399905	COL4A4, LAMA4, COL19A1, COL27A1, COMP, IMPG2, FBN1, FBN3, VCAN, COL1A1, LAMC1, COL5A3, COL5A1, MUC5B	GO:0051056~regulation of small GTPase mediated signal transduction	6	0.066172	ARHGAP32, SIPA1L3, MYO9A, ARHGAP26, ARHGDIB, ARHGAP12
GO:0005516~calmodulin binding	28	0.0534431	KCNH1, AEBP1, MYH15, ARPP21, WFS1, IQGAP3, STRN, ATP2B4, PDE1A, CAMK2D, TRPV5, PCYT1A, NOS3, PPP3CA, ASPM, SLC8A1, MYO6, CAMK1G, MYO1B, MYO10, RASGRF2, CAMK4, KCNN2, SPTBN1, CAMK1, IQCG, MYLK, FBXL2	GO:0003779~actin binding	38	0.00469718	GC, MYBPC2, SSH3, SSH2, WASF2, DIAPH3, UTRN, INO80, MYO9B, DAAM1, PFN1, MACF1, MYO15A, CNN1, PPP1R42, PLEC, PHACTR4, MYH1, MYO3A, INPPL1, TRPM7, MYH2, ENC1, MYH4, COTL1, LSP1, EPB41L2, EPB41L3, FMN2, SYNE1, XIRP1, EPS8, XIRP2, FKBP15, LRRK2, DST, FHOD1, ALKBH4	GO:0036064~ciliary basal body	5	0.0670972	AHI1, ODF2, CENPJ, USH2A, DISC1
GO:0016055~Wnt signaling pathway	28	0.0544461	WNT5A, CTNND2, STRN, LGR6, TCF7L1, AMER3, WNT2, TNKS, LRRFIP2, WNT6, USP34, CDK14, CUL1, CCAR2, PITX2, FZD9, WNT10A, TCF7, RYK, CSNK2B, SKP1, ARL6, KIAA0922, GRK6, KLHL12, MCC, WNT9A, WNT7A	GO:0006897~endocytosis	23	0.00471417	CAV3, PIK3CG, DNM3, ARC, SYNRG, DNM1L, INPPL1, SNX4, STAB2, SHH, APLP1, CLEC4M, SIGLEC1, NPC1, VAMP7, LRP12, FKBP15, SNX32, LRRK2, LRP4, DNM2, SGIP1, RIN3	GO:0016020~membrane	44	0.0690137	ITGAL, PRKCZ, SEC24B, GNAI2, FKBP5, ADORA2A, ERBB2, RNF213, STAU2, MYCBP2, ST3GAL1, CUL3, SLC1A5, MIA3, RAD21, FAT4, SLC24A1, CSF2RA, GOLGA3, AHNAK, CSF1R, ARHGDIB, CDH23, STMN2, SCD, XKR9, SHANK1, HLTF, RPH3A, HNRNPA1, OASL, PSMC6, UNC13D, KSR2, NNT, KCNT2, ADGRV1, PRKAR1A, RYR1, CNTN1, RYR2, JAK2, NUP107, NCOR2
GO:0000165~MAPK cascade	37	0.0562321	MEF2C, FGFR3, NDST1, PDGFA, FGF10, AKAP9, IL17RD, GDNF, IL31RA, RASAL2, PSMB4, MAP3K4, RASGRP3, SOS1, MAP3K1, PSMD1, CAMK2D, FRS3, NRG1, RAPGEF2, EGF, FGF2, RASA1, RASA2, IL5, KLB, ACTN2, IRS1, PSMB9, MEF2D, PSMD14, RASGRF2, CCR5, MAPK13, SPTBN1, PPM1L, SYNGAP1	GO:0043235~receptor complex	21	0.00479285	RAMP3, GPR84, FLT1, TGFBR1, LRP1B, NR3C2, PIGR, PEX5L, PKD2L1, GPR37L1, INSRR, NOTCH3, KCTD8, IGF1R, ACVR2A, ADGRV1, GRM7, IL4R, IMPG2, TGFBR3, VLDLR	GO:0003725~double-stranded RNA binding	4	0.0696196	OASL, A1CF, DDX60, STAU2
GO:0051403~stress-activated MAPK cascade	6	0.0619667	CCM2, AGT, NFKB1, SKP1, TNIP2, CUL1	hsa04610:Complement and coagulation cascades	14	0.00488617	F11, MASP1, C4B, C6, BDKRB1, C1S, C1QC, PROC, F13B, VWF, F5, FGB, KLKB1, TFPI	GO:0007155~cell adhesion	13	0.0697564	CTNNAL1, ITGAL, BMP10, CNTN6, NID2, ITGA9, TNR, FAP, CNTNAP3, PCDHA10, CNTN1, SPAM1, THBS3
GO:0048786~presynaptic active zone	7	0.0657483	PPFIA4, GRM7, ERC2, SV2A, GPER1, ADORA1, RIMS1	GO:0050796~regulation of insulin secretion	14	0.00492222	HNF1A, KCNB1, SYT7, ITPR1, G6PC2, GCG, HNF4A, CNR1, SLC2A1, CACNA1E, RFX3, RAPGEF4, CACNA1D, CACNA1A	GO:0007169~transmembrane receptor protein tyrosine kinase signaling pathway	5	0.0698759	ERBB2, ZAP70, AHI1, CSF1R, SYK
GO:0042813~Wnt-activated receptor activity	6	0.0703697	FZD9, RYK, FZD1, FZD5, EGF, FZD7	GO:0016020~membrane	219	0.00512995	ADCY8, IL6ST, ADCY6, UTRN, SYT7, RNF213, CTNNB1, NONO, DDX17, GBF1, DHX34, RAPGEF4, STAG2, AUP1, CDH23, PIK3CG, F11, IBTK, CDHR1, MED12, WNK1, MED13, SIRPA, CLEC4M, OGFOD3, TMEM131, NPC1, MED15, F5, LAMC3, RPS12, RYR1, EIF2AK3, GIGYF2, ACAA1, GLG1, KIAA1109, GCNT2, SORCS1, AKAP13, MYO9B, RFFL, DAAM1, ARFGEF2, PFN1, LFNG, OSBPL5, TGFBR1, PCNT, NUF2, EPRS, NCKAP1L, CD5L, LARP4B, VDAC1, SYNE3, GRK6,…	GO:0003779~actin binding	9	0.0699366	TNS1, MYO7B, MYO15A, MYH7, KLHL4, MKL1, MYO9A, SNTG2, SPTB
GO:0046427~positive regulation of JAK-STAT cascade	6	0.0735402	LEP, IL5, IL19, ADIPOR1, PRL, IL10	GO:0001778~plasma membrane repair	5	0.00517035	CAV3, MYH2, AHNAK2, SYT7, MYOF	GO:0035035~histone acetyltransferase binding	3	0.0701221	ZBTB7A, TP53, PAX6
GO:0016192~vesicle-mediated transport	23	0.074912	CCZ1B, SEC24B, STX1A, CLTB, PRKCI, AHI1, VPS41, PARK2, AP4M1, STXBP5L, TRAPPC12, COPB2, NCK2, FMN2, ADAMTS9, COPG2, STXBP5, VAMP5, ARAP3, CLINT1, KIF20A, KALRN, RHOBTB3	GO:0004386~helicase activity	16	0.00531919	BTAF1, HELQ, SHPRH, DICER1, DDX47, DDX17, NAV2, DDX3Y, DHX34, SMARCA5, DDX50, RAD54L2, SMARCA1, SRCAP, EP400, HFM1	GO:0019013~viral nucleocapsid	3	0.070165	SNRPC, HNRNPA1, AHNAK
GO:0035725~sodium ion transmembrane transport	13	0.0771512	SCN1A, CNNM4, SLC8A1, SCN3A, SLC34A1, KCNK1, SCN9A, SLC13A1, SLC13A4, SLC4A4, HCN3, SCN10A, SLC4A5	hsa05210:Colorectal cancer	13	0.00538164	PIK3CG, MAPK1, BRAF, MSH2, TGFBR1, TP53, SMAD4, PIK3CA, LEF1, PIK3R3, TGFB1, RALGDS, CTNNB1	GO:0005096~GTPase activator activity	9	0.0713058	ARHGAP21, ARHGAP32, SIPA1L3, MYO9A, ARHGAP26, TBC1D8B, AGAP4, ARHGDIB, ARHGAP12
GO:0006814~sodium ion transport	14	0.0789727	SCN1A, SGK1, SCN3A, ATP1A4, SLC38A11, CATSPER3, SLC22A4, SCN9A, SLC13A1, SLC9B2, SLC5A7, SLC22A5, SLC13A4, SLC4A4	GO:0032451~demethylase activity	4	0.0054744	KDM1A, CYP1A1, MMACHC, ALKBH4	GO:0004842~ubiquitin-protein transferase activity	10	0.0736685	DTX4, CUL3, TRIM37, ZNF738, PAX6, KBTBD7, HECTD4, KLHL4, TRAF5, RNF213
GO:0001105~RNA polymerase II transcription coactivator activity	8	0.082611	JADE1, HYAL2, TBX20, HIPK2, NEUROD1, POU1F1, PITX2, MED12L	GO:0001756~somitogenesis	10	0.00564912	PLXNA2, ROR2, LEF1, PRKDC, FOXC1, PALB2, LFNG, PAX1, ATM, BMPR1A	GO:0086010~membrane depolarization during action potential	3	0.0745448	SCN5A, SCN10A, CACNA1B
GO:0008559~xenobiotic-transporting ATPase activity	3	0.086845	ABCB5, ABCG2, ABCB4	GO:0051591~response to cAMP	11	0.00568018	BRAF, DUSP1, SLC6A3, MMP19, DUOX2, TEK, PER1, COL1A1, SPARC, BIRC2, ALDH3A1	GO:0043547~positive regulation of GTPase activity	15	0.0750029	ERBB2, SIPA1L3, CD40, MYO9A, ARHGAP26, ARHGAP12, ARHGAP21, ARHGAP32, PLEKHG1, JAK2, SPTA1, CSF2RA, AGAP4, ARHGDIB, SPTB
GO:0038031~non-canonical Wnt signaling pathway via JNK cascade	3	0.0888294	WNT5A, FZD7, MYOC	hsa05205:Proteoglycans in cancer	29	0.00577033	CAV3, WNT3A, MMP9, TGFB1, CTNNB1, IGF1R, SOS1, CAMK2D, PIK3CA, PIK3R3, FRS2, CAMK2A, ACTB, FZD9, PIK3CG, ARHGEF1, BRAF, TP53, HSPG2, ESR1, IGF2, FZD2, FLNC, ITPR1, FZD7, MAPK1, PPP1CA, PLCE1, CBLB	GO:0032421~stereocilium bundle	2	0.0755362	TRPA1, USH2A
GO:0000978~RNA polymerase II core promoter proximal region sequence-specific DNA binding	46	0.0904332	MEF2C, TBX20, FIGLA, POU1F1, ZIC1, GLI3, MEIS1, T, HOXA2, ZSCAN21, PAX8, BCL11A, CEBPZ, ZNF735, ACTL6A, ZNF395, RUNX2, PITX1, PITX2, ACTB, ZNF281, ZNF479, RFX5, ZNF92, MLXIPL, SIX2, ZNF141, IFI16, HLTF, CARF, FEZF1, MEF2D, NRF1, HDAC2, ATF3, EBF2, ZNF716, PRDM5, TFAP2A, NEUROD1, ZNF876P, PBX1, ZNF746, RBPJ, FOXI1, CLOCK	hsa04930:Type II diabetes mellitus	11	0.00626424	PIK3CG, IRS4, MAPK1, CACNA1G, HK2, PIK3CA, HK1, CACNA1E, PIK3R3, CACNA1D, CACNA1A	GO:0070296~sarcoplasmic reticulum calcium ion transport	2	0.0781393	ANK2, RYR2
GO:0043194~axon initial segment	4	0.091336	NRCAM, SCN1A, NFASC, CAMK2D	GO:0046966~thyroid hormone receptor binding	8	0.0063694	HMGN3, NCOA6, MED12, MED24, JMJD1C, MED13, NCOR1, GTF2B	GO:1904714~regulation of chaperone-mediated autophagy	2	0.0781393	GFAP, EEF1A2
GO:0050804~modulation of synaptic transmission	5	0.0950791	HRH1, PPP3CA, CSPG5, PXK, BTBD9	GO:0005452~inorganic anion exchanger activity	7	0.00684543	SLC4A10, SLC22A8, SLC4A8, SLC4A7, SLC4A2, SLC4A1, SLC4A9	GO:0086046~membrane depolarization during SA node cell action potential	2	0.0781393	ANK2, SCN5A
GO:0070371~ERK1 and ERK2 cascade	6	0.099924	ZFP36L2, PTGER4, AGT, IQGAP3, FGF10, EGF	GO:0031512~motile primary cilium	5	0.00700874	DNAH11, PKD2, DYNC2H1, PKD1, SAXO1	GO:0048496~maintenance of organ identity	2	0.0781393	ADGRV1, USH2A
GO:0051602~response to electrical stimulus	6	0.099924	AIF1, NTRK1, MSTN, AKAP9, CD14, DISC1	GO:0005858~axonemal dynein complex	5	0.00700874	DNAH17, DNAH3, DNAH1, DNAH8, DNAH6	GO:0000139~Golgi membrane	15	0.0818976	HS3ST6, SEC24B, AP1B1, ST8SIA3, NOTCH3, ARHGAP21, ST3GAL1, CUL3, RAB11FIP5, ARHGAP32, MIA3, ST8SIA4, TNKS, GALNT12, GOLGA3
GO:0005524~ATP binding	224	9.24477e-08	MOK, ADCY4, DYNC1LI2, RAD51B, ADCY6, NMRK1, KIFC3, ATP2B1, PSKH1, DHX38, CLK3, DHX37, MAT1A, MAP3K9, WNK4, ILK, DHX33, STKLD1, DDX10, ANKK1, DHX32, SYK, HKDC1, MYLK3, ACSM2A, ABCC11, ABCC12, WNK2, NAV3, NME4, ATP2C2, NEK9, ROR2, YME1L1, KIF26A, CHORDC1, MYO18A, EIF2AK4, NEK6, ERBB3, ERBB2, TDRD9, OAS3, MYO9A, VRK1, MYO15A, RECQL4, DHX8, MKI67, TAOK2, TAOK1, TAOK3, ACACA, ATP11A, ACACB, GUCY2C, AB…	hsa04973:Carbohydrate digestion and absorption	10	0.00770667	PIK3CG, SI, HK2, PIK3CA, HK1, ATP1A2, PIK3R3, CACNA1D, AMY1A, G6PC2	hsa05168:Herpes simplex infection	7	0.082814	USP7, CREBBP, TP53, JAK2, NXF1, TRAF5, TAB2
GO:0070588~calcium ion transmembrane transport	26	0.000732939	DENND5A, TRPC4, TRPM6, TRPM5, TRPM7, GRIN1, TRPV3, TRPA1, CACNB2, TMC1, GRIN3A, PKD2L1, TRPM1, ORAI3, CACNA2D4, ATP2B1, CUL5, ATP2C2, SLC25A25, ATP2A3, CACNA1H, ASPH, DENND5B, CHRNA10, ANO6, CACNA1B	GO:0045494~photoreceptor cell maintenance	9	0.00786888	RP1, TUB, ADGRV1, CDHR1, RP1L1, ABCA4, BBS10, USH2A, CDH23	GO:0016301~kinase activity	8	0.0836479	GCKR, PHKB, ERBB2, PRKAR1B, PRKAR1A, AKAP7, JAK2, TAB2
GO:0043225~anion transmembrane-transporting ATPase activity	6	0.00373622	ABCC9, ABCC11, ABCC1, ABCC2, ABCC8, ABCC6	GO:0030054~cell junction	55	0.00803078	GABRB2, GRIK3, UTRN, DUOX2, CLSTN1, SYT7, CTNNB1, ATP2B2, DCAF13, MIOS, DMXL2, HMCN1, KDF1, GRIN2B, SV2B, SV2C, DSCAM, ARC, C4B, GRIN2A, SDK1, PTPRR, NRXN1, RPH3A, EPB41L2, DACT1, XIRP1, XIRP2, OTOF, VAMP7, PAF1, LRRK2, SYNDIG1, CDH1, RIMS2, ARFGEF2, GPR142, CDH5, C4ORF19, CAMK2A, LRFN2, DNM1L, KCNB1, GRIA4, SHANK1, SHANK2, KCTD8, CADPS, PPP1R9A, EPS8, GRIA2, GRIA1, CHRNB4, NSMF, CHRNB2	GO:0007062~sister chromatid cohesion	5	0.0854402	RAD21, ZWINT, NUP107, MIS12, STAG1
GO:0015347~sodium-independent organic anion transmembrane transporter activity	8	0.00482059	SLCO1B3, SLCO1A2, SLC22A12, SLC22A24, SLC22A8, SLC22A20, SLCO3A1, SLCO5A1	GO:0001501~skeletal system development	22	0.00819197	MMP9, TGFBR1, FBN1, FGFRL1, HOXD12, IGF2, POSTN, INHA, SOX9, EXTL1, PAX1, EPHA2, COL9A2, COL19A1, COMP, HOXA10, VCAN, FOXC1, COL1A1, EXT1, EIF2AK3, CDH11	GO:0031463~Cul3-RING ubiquitin ligase complex	4	0.0868008	CUL3, KBTBD7, KLHL4, SPOP
GO:0043547~positive regulation of GTPase activity	81	0.00569673	A2M, DENND5A, FGF9, ARHGAP19, ARHGAP17, IQGAP1, MCF2L, ARHGAP12, AGAP6, ARHGAP5, ARHGAP1, GIT2, ARHGEF40, DENND5B, AGAP2, RAPGEF1, AGAP4, DAB2IP, RSU1, RET, MADD, ARHGEF17, FGF23, ARHGEF12, FARP1, PLCE1, ARHGAP32, SGSM2, RASGRF1, ARRB1, RIN1, RANGRF, RAPGEFL1, FGFR2, ARHGEF25, ERBB3, ERBB2, SIPA1, CCL8, AKAP13, CX3CL1, MYO9A, LLGL1, RIC1, STARD13, TBC1D3B, PLEKHG3, RASAL1, CDC42EP2, PTK2, DOCK1, …	GO:0034237~protein kinase A regulatory subunit binding	6	0.00891944	AKAP6, AKAP9, AKAP8, AKAP1, ARFGEF2, KCNQ1	hsa05230:Central carbon metabolism in cancer	4	0.0893746	SLC1A5, ERBB2, TP53, PTEN
GO:0017137~Rab GTPase binding	25	0.00809499	MYO5A, DENND5A, RABGAP1, SLC6A4, RIMS2, RIC1, LLGL1, TBC1D3B, TBC1D15, DMXL2, TBC1D12, NDRG1, EHD1, GOLGA5, TBC1D2, DNM1L, EXPH5, DENND1A, RAB11FIP2, RAB11FIP3, SGSM2, ULK1, GRTP1, ANKFY1, UNC13B	GO:0030574~collagen catabolic process	13	0.00892252	COL4A4, ADAMTS14, MMP9, MMP19, MMP16, COL5A3, FURIN, COL5A1, COL19A1, COL7A1, COL6A6, COL1A1, ADAMTS3	GO:0016817~hydrolase activity, acting on acid anhydrides	2	0.0899245	CHD9, CHD7
GO:0051056~regulation of small GTPase mediated signal transduction	25	0.00812297	A2M, SIPA1, ARHGAP19, AKAP13, ARHGAP17, MYO9A, MCF2L, ARHGAP12, STARD13, ARHGAP5, ARHGAP44, ARHGAP1, SOS2, RHOBTB1, RHOD, RHOG, ABR, ARHGEF17, VAV2, ARHGEF12, ARHGAP32, RALGAPA1, SIPA1L1, RHOT2, ARAP1	hsa04720:Long-term potentiation	13	0.00897748	BRAF, ADCY8, GRIN2A, GRM1, ITPR1, MAPK1, PPP1CA, ATF4, GRIA2, GRIN2B, GRIA1, CAMK2D, CAMK2A	GO:0003828~alpha-N-acetylneuraminate alpha-2,8-sialyltransferase activity	2	0.0899245	ST8SIA4, ST8SIA3
GO:0090090~negative regulation of canonical Wnt signaling pathway	28	0.0145561	WNT5B, FOXO1, GREM1, TCF7L2, GLI1, PSMB11, CYLD, CHD8, PSMB3, PSMD5, PSMD7, RAPGEF1, AXIN1, DVL2, DAB2IP, PTPRO, SFRP5, PSMA1, DKK3, PSMC6, NOTCH1, DACT1, SOST, PRICKLE1, PSMA4, UBC, LRP6, ROR2	GO:0016339~calcium-dependent cell-cell adhesion via plasma membrane cell adhesion molecules	8	0.00897937	CDH16, PCDHB6, PCDHB16, DSG1, PCDH12, NRXN1, DCHS1, CDH23	GO:0042048~olfactory behavior	2	0.0930213	CHD7, SHANK1
GO:0005262~calcium channel activity	15	0.0153821	DENND5A, TRPC4, TRPM6, TRPM7, TRPA1, TRPV3, GRIN1, CACNB2, GRIN3A, PKD2L1, TRPM1, CUL5, DENND5B, CHRNA10, CACNA1B	GO:0086091~regulation of heart rate by cardiac conduction	9	0.00943413	TRPM4, KCND3, CACNA1G, CAMK2D, KCNE2, AKAP9, HCN4, CACNA1D, KCNQ1	GO:0086015~SA node cell action potential	2	0.0930213	ANK2, SCN5A
GO:0070072~vacuolar proton-transporting V-type ATPase complex assembly	5	0.016282	TCIRG1, DMXL2, INPP5F, ATP6V0A1, ATP6V0A2	GO:0030501~positive regulation of bone mineralization	9	0.00943413	FZD9, ACVR2A, SLC8A1, ISG15, NELL1, BMPR2, TMEM119, TGFB1, BMPR1A	GO:0035773~insulin secretion involved in cellular response to glucose stimulus	2	0.0930213	RAB11FIP5, PTPRN
GO:0005096~GTPase activator activity	42	0.0229243	A2M, RABGAP1, SIPA1, ARHGAP19, ARHGAP17, MYO9A, LLGL1, IQGAP1, TBC1D3B, STARD13, ARHGAP12, RASAL1, TBC1D15, AGAP6, CDC42EP2, DOCK1, ARHGAP5, TBC1D12, ARHGAP44, ARHGAP1, GIT2, RASA3, AGAP2, AXIN1, TBC1D2, AGAP4, GIT1, DAB2IP, DNM1L, ABR, ARHGEF12, RGS22, TBC1D24, RALGAPA1, ARHGAP32, SGSM2, RABEP1, ARRB1, SIPA1L1, GRTP1, RIN1, ARAP1	GO:0005251~delayed rectifier potassium channel activity	9	0.00974239	KCNH1, KCNC1, KCNQ5, KCND3, KCNC4, KCNB1, KCNE2, KCNQ2, KCNQ1	GO:0090330~regulation of platelet aggregation	2	0.0930213	ZAP70, SYK
GO:0090263~positive regulation of canonical Wnt signaling pathway	21	0.0303012	DVL2, FGFR2, FGF9, LGR5, LGR4, PSMB11, JUP, PSMA1, WNT1, PSMC6, PSMA4, PSMB3, UBR5, ILK, RSPO2, UBC, LRP6, ROR2, PSMD5, PSMD7, AXIN1	GO:0006940~regulation of smooth muscle contraction	6	0.009879	PLCE1, NMUR2, CHRNB4, CNN1, ATP1A2, DAPK3	GO:0051480~regulation of cytosolic calcium ion concentration	3	0.0938527	RYR1, RYR2, CDH23
GO:0005078~MAP-kinase scaffold activity	4	0.0309162	MAPK8IP3, AKAP13, MAPK8IP1, KSR1	GO:0006349~regulation of gene expression by genetic imprinting	6	0.009879	DNMT3A, ARID4B, CTCFL, IGF2, CTCF, KCNQ1	hsa00970:Aminoacyl-tRNA biosynthesis	4	0.0959116	CARS, CARS2, QARS, IARS2
GO:0097151~positive regulation of inhibitory postsynaptic potential	4	0.0309408	ABAT, NLGN2, RIMS2, UNC13B	GO:0030018~Z disc	19	0.00998455	CAV3, OBSCN, SLC8A1, SCN1A, NOS1, CRYAB, MYL12B, TTN, FLNC, CTNNB1, XIRP2, RYR1, ADRA1A, AHNAK2, FBXL22, SLC4A1, SCN8A, CACNA1D, DST	GO:0005622~intracellular	28	0.0964728	CTNNAL1, ZNF19, PRKCZ, ZNF841, ZNF619, MYO9A, KIF13A, ANK2, DIRAS3, ZNF738, FAT4, ZNF730, ZNF606, SCN5A, CSF2RA, CSF1R, ZNF43, ZNF620, SHANK1, RPH3A, TRIM37, CLEC1A, TNS1, KSR2, ASB1, AKAP7, TBC1D8B, ZNF573
GO:0098656~anion transmembrane transport	8	0.0360381	ABCC9, SLC22A8, ABCC11, ABCC1, ABCC2, ABCA1, ABCC8, ABCC6	GO:0009791~post-embryonic development	14	0.0102694	KMT2A, INPPL1, TGFBR1, SCUBE1, TIPARP, ITPR1, FOXP2, APOB, SLC4A10, DHCR7, CSRNP1, RC3H2, MAPK8IP3, GIGYF2
GO:0010803~regulation of tumor necrosis factor-mediated signaling pathway	8	0.0360381	TRAF2, CYLD, TNFRSF1A, MADD, UBC, BIRC3, SYK, RNF31	GO:0043194~axon initial segment	5	0.0102856	SCN1A, NFASC, CAMK2D, SCN8A, KCNQ2
GO:0007597~blood coagulation, intrinsic pathway	6	0.0367559	VWF, A2M, F10, F2, SERPING1, GP1BA	GO:0038084~vascular endothelial growth factor signaling pathway	4	0.0109807	NRP2, FLT1, FLT3, FOXC1
GO:0007268~chemical synaptic transmission	36	0.0370254	MYO5A, SLC6A2, OPRK1, GRIK4, SLC6A4, CACNB2, KCNQ3, APBA2, NPFF, NOVA1, APBA1, PTPRD, NRXN2, SYT10, SLC12A4, GRIN1, GABRA5, MINK1, PCDH8, DBH, OR5T2, GRM5, SSTR5, PENK, SSTR1, SLC6A5, HTR7, MTNR1B, AKAP5, SLC18A2, LRP6, SLC18A3, UNC13C, UNC13B, CACNA1B, HTR2A	GO:0008017~microtubule binding	29	0.0109823	RP1, CETN2, KIF13A, NDE1, MACF1, KIF21A, SGIP1, JAKMIP1, KIF2A, DNM3, DNM1L, CRYAB, PSRC1, KIF5C, SUN2, CENPE, KIF16B, RACGAP1, SAXO1, MARK4, KIF1C, KRIT1, GAS2L2, DNM1P34, KIF19, LRRK2, KIF26B, PPP5C, DNM2
GO:0034704~calcium channel complex	7	0.0394296	TRPC4, HERPUD1, MICU2, AKAP6, ASPH, PKD2L1, CALM1	hsa04015:Rap1 signaling pathway	29	0.0110993	ADCY8, GNAI1, ADCY6, LPAR3, CDH1, APBB1IP, ITGAM, CTNNB1, IGF1R, PFN1, GRIN2B, CNR1, TEK, PIK3CA, RAPGEF4, PIK3R3, RAPGEF1, ACTB, PIK3CG, FLT1, BRAF, GRIN2A, RALGDS, EPHA2, DOCK4, MAPK1, RASSF5, PLCE1, KRIT1
GO:0005215~transporter activity	31	0.0409622	SLC5A2, SLC13A5, SLC37A4, RASSF9, ABCA2, STARD10, ABCA1, ABCA3, AQP2, SLCO1A2, CRYM-AS1, SCARB1, SLCO3A1, CLVS1, SLCO5A1, GOLGA3, OCA2, TCIRG1, CUBN, NUP88, SLC12A4, GABRA5, SLCO1B3, ABCC9, IPO7, ABCC1, CPNE3, SLC15A4, SLC46A1, SLC46A2, ABCC6	GO:0060285~cilium-dependent cell motility	5	0.0117441	DNAH17, DNAH3, RFX3, DNAH1, DNAH8
GO:0042626~ATPase activity, coupled to transmembrane movement of substances	10	0.0411159	ABCC9, ABCC11, ABCC1, ABCA2, ABCC2, ABCC12, ABCA1, ABCC8, ABCA3, ABCC6	GO:0001701~in utero embryonic development	27	0.0125386	GNA13, STIL, KDM6A, C6, WNT3A, ARNT2, PRKCSH, CTNNB1, KDM1A, APOB, PLOD3, PKD1, POLG2, APBA1, AR, MSH2, TGFBR1, SMAD4, PTPRR, LIG4, TAB1, CUL4A, EPB41L5, MAPK8IP3, ALKBH1, FOXC1, BMPR1A
hsa01100:Metabolic pathways	156	0.0443215	LDHB, SC5D, GBGT1, PTGS1, NMRK1, ST3GAL2, NANS, GOT1, MAT1A, CYP7A1, NT5C2, ALDH6A1, SGPL1, PLD2, SPTLC2, CMAS, HKDC1, ACSM2A, POLE, FBP1, CYP26A1, FBP2, CYP2E1, LPCAT2, NME4, PLCE1, PI4K2A, ATP5C1, ABAT, EXT1, PCCA, ACADSB, GCNT3, TALDO1, GNE, ALDOC, GLUD1, ACAT1, CSAD, GALNS, GALC, GCNT1, ADSSL1, B4GAT1, RPEL1, NDUFA4L2, CYP2C9, AK1, ACACA, GALT, DLAT, ACACB, UAP1L1, AK7, AK8, RIMKLB, CYP17A1, …	GO:0001917~photoreceptor inner segment	9	0.0125398	RP1, DNM3, NOS1, GNB1, INHA, SHANK2, USH2A, SAG, DNM2
GO:0019933~cAMP-mediated signaling	9	0.0453036	ADCY4, EIF4EBP2, ADCY9, ADCY6, AKAP6, PDE3A, RIMS2, KSR1, GAL	hsa04261:Adrenergic signaling in cardiomyocytes	21	0.0125965	PPP2R1A, GNAI1, ADCY8, CACNG7, ADCY6, ATP1A2, CACNB4, CACNA2D3, CACNA1S, RPS6KA5, MAPK1, ATP2B2, PPP1CA, ATF4, ADRA1B, CAMK2D, ADRA1A, RAPGEF4, CACNA1D, CAMK2A, KCNQ1
GO:0008094~DNA-dependent ATPase activity	8	0.0493575	IGHMBP2, RAD51B, CHD8, ERCC6, SMARCA2, TOP2A, MYO18A, RAD51	GO:0042391~regulation of membrane potential	14	0.012813	CAV3, TRPM4, KCNH1, GRIK3, RIMS2, CNGA4, CNGA1, SLC1A6, SLC26A9, CACNA1G, KCNH7, HCN4, LRRK2, KCNH3
GO:0048167~regulation of synaptic plasticity	8	0.0494244	EIF4EBP2, FGF14, RASGRF1, P2RX3, SIPA1L1, PPP3CB, RARA, NPAS4	GO:0021522~spinal cord motor neuron differentiation	6	0.0130027	IFT172, MDGA2, DYNC2H1, GIGYF2, CACNA1A, SHH
hsa04010:MAPK signaling pathway	38	0.0563428	FGFR2, TRAF2, FGF14, FGF9, MAP4K2, FGF11, PPM1A, TGFB3, CACNB2, MAX, TNFRSF1A, JMJD7-PLA2G4B, BDNF, HSPA2, RASGRP2, SOS2, DUSP16, PPP3CB, TRAF6, NFATC3, TAOK2, TAOK1, TAOK3, PTPRR, FGF23, CACNA2D4, RPS6KA4, RASGRF1, ARRB1, RRAS2, CACNA1H, MAPK8IP3, RAP1B, MAPK8IP1, DUSP8, CRK, MAP3K12, CACNA1B	GO:0019233~sensory perception of pain	11	0.0136672	MAPK1, HOXB8, MRGPRX2, CNR1, TRPA1, GRIN2A, MME, BDKRB1, CHRNB2, GRM1, SCN10A
GO:0043531~ADP binding	8	0.057079	MYO3A, PRKAG1, GLUD1, MYO7A, APAF1, CHORDC1, MYO18A, MYH10	GO:0071320~cellular response to cAMP	11	0.0136672	PIK3CG, KDM1A, SLC5A5, SLC8A1, EEF2K, AKAP6, AKAP9, HCN4, CPS1, RAPGEF1, KCNQ1
GO:0098641~cadherin binding involved in cell-cell adhesion	41	0.0575094	TLN1, CHMP5, ABI1, CDH1, KLC2, GPRC5A, SCRIB, IQGAP1, CTTN, SH3GLB2, RPL6, ARHGAP1, NDRG1, FAM129B, RPL7A, EHD1, GOLGA3, EHD4, UNC45A, DAB2IP, CKAP5, TRIM29, CBL, PFKP, PPFIBP1, MPP7, MPRIP, JUP, TNKS1BP1, CORO1B, KRT18, STXBP6, LASP1, PKP3, SPTBN2, TMOD3, EEF1G, EEF1D, TJP2, EPN2, SPTAN1	hsa04022:cGMP-PKG signaling pathway	23	0.0143317	GNA13, IRS4, SLC8A1, ADORA3, ADCY8, GNAI1, ADCY6, ATP1A2, CACNA1S, ITPR1, CNGA1, VDAC1, KCNU1, ATP2B2, MAPK1, PPP1CA, ATF4, PDE5A, GATA4, ADRA1B, GUCY1A2, ADRA1A, CACNA1D
GO:0007167~enzyme linked receptor protein signaling pathway	4	0.0631032	ERBB2, CD4, JAK2, SYK	GO:0005796~Golgi lumen	16	0.0143708	MUC2, KERA, WNT3A, MUC20, GOLIM4, HSPG2, CSPG4, MMP16, FURIN, GAS6, TGFB1, PROC, VCAN, MUC5B, MUC17, MUC16
GO:0090630~activation of GTPase activity	14	0.0769053	RABGAP1, SCRIB, TBC1D3B, PLEKHG4, TBC1D15, CCR7, RALGAPA1, TBC1D12, SGSM2, RASGRF1, SIPA1L1, GRTP1, RHOG, TBC1D2	GO:0016301~kinase activity	32	0.0144482	FGGY, NELL1, BRSK2, PRKDC, AKAP9, PRKCSH, CMPK2, GALK2, MAP3K9, DYRK4, PIK3CA, PRPS1L1, STK19, PIK3R3, CAMK2A, CIITA, PIK3CG, TAF1, BRAF, WNK1, PI4KA, SCYL3, TAB1, EPHA2, DAPK1, MAPK1, EPS8, AKAP6, MAPK8IP3, LRRK2, AKAP1, MAP3K11
GO:0005509~calcium ion binding	90	0.0771223	ASPN, PLCZ1, LTBP3, CLSTN3, NELL1, DUOX2, DUOX1, ZZEF1, IQGAP1, CALB2, CAMKK2, SLC25A25, GSN, TPT1, EEF2K, OIT3, ASPH, PLCB2, VWA2, CDH23, RET, F10, SCUBE2, PCDH9, ACTN1, PCDH8, CDHR5, F7, ACTN3, LPCAT2, SLIT1, MMP12, PKD2L1, PITPNM2, RAB11FIP3, F2, NUCB2, FKBP10, AOC3, CRACR2A, MYO5A, PRF1, MYL2, ENPP2, ADAMTS13, CABP1, CABP4, CDH1, ASTN2, CDH5, DCHS1, CAPS2, JMJD7-PLA2G4B, CALML4, GNPTAB, CRB2,…	GO:0005635~nuclear envelope	23	0.0145251	WDFY3, NELL1, POLA1, SUN2, LMNA, LTC4S, TERF2IP, TNKS2, SYNE3, ANXA7, RNF43, NPC1, SYNE1, CYBB, CSE1L, MNS1, AKAP6, LRMP, OIT3, NSMF, MYOF, DST, UBXN4
GO:0043401~steroid hormone mediated signaling pathway	11	0.0796729	VDR, ESRRA, THRA, ESRRB, RXRA, ABHD2, RARA, RORA, NR4A3, NR1H3, NR2C1	GO:0061337~cardiac conduction	10	0.0147126	TRPM4, KCND3, CACNG7, KCNE2, AKAP9, CACNB4, CACNA2D3, CACNA1D, CACNA1S, KCNQ1
GO:0000122~negative regulation of transcription from RNA polymerase II promoter	90	0.0844475	RITA1, HNF1B, FGF9, E2F8, CNOT2, FOXO1, ZNF202, ZEB1, SCGB1A1, ZNF205, EPC1, CRY2, SIN3A, GFI1B, OSR2, HSF1, WWP2, ZFP90, HOMEZ, EED, RARA, POU4F1, E4F1, HSF4, ATF7IP, CIITA, DAB2IP, NODAL, RXRA, ARID5B, ZHX2, HMG20A, UBE2I, VAX1, SKOR1, KDM2B, NCOA2, DACT1, UBC, FOXC2, ZFPM2, CUX2, SMARCA2, FGFR2, HMGB1, STRAP, FOXM1, PPM1A, HCFC2, TCF7L2, WT1, NR2C1, STAT6, VDR, CHD8, MEIS2, OVOL1, NKX2-1, PER1…	GO:0018107~peptidyl-threonine phosphorylation	9	0.0155197	MAPK1, TAF1, TGFBR1, LMTK2, CAMK2D, WNK1, CAD, CLK1, LRRK2
hsa04721:Synaptic vesicle cycle	12	0.0917119	TCIRG1, AP2B1, SLC18A2, STXBP1, SLC18A3, ATP6V0A1, UNC13C, ATP6V0D1, UNC13B, DNM1, ATP6V0A2, CACNA1B	GO:0030425~dendrite	41	0.0162765	KCNH1, KCNC1, IL6ST, GRIK3, CRTC1, DICER1, BMPR2, MME, RCVRN, PCSK2, ALCAM, LMTK3, SNAP47, BRINP3, HTR1D, ADCY10, KNDC1, HTR1E, KCND3, C4B, KCNB1, SACS, GRIA4, SHANK1, CAPN2, GRM1, CYBB, PPP1R9A, BPTF, GRIA1, GNB1, GRM7, GRM6, MAPK8IP3, NSMF, RELN, LRRK2, CACNA1A, KPNA1, LRP4, BMPR1A
GO:0061591~calcium activated galactosylceramide scrambling	3	0.0922598	ANO3, ANO6, ANO9	GO:0070989~oxidative demethylation	5	0.0164118	CYP2C9, CYP2C8, ALKBH1, TET1, ALKBH2
GO:0017112~Rab guanyl-nucleotide exchange factor activity	7	0.0952519	DENND5A, MADD, DENND4C, DENND1A, DENND4A, DENND5B, RIC1	GO:0008584~male gonad development	16	0.0164309	MSH2, NASP, TGFBR1, RXFP2, ESR1, INHA, HMGA2, SOX9, INHBA, NUPR1, GATA4, HOXA10, MAMLD1, PRPS1L1, TFAP2C, LHX9
GO:0006812~cation transport	7	0.0953582	TRPM7, GRIN1, ANO1, CHRNB1, HCN4, ANO6, PKD2L1	GO:0043005~neuron projection	31	0.0165535	SLC6A3, SYNJ1, BDKRB1, RIC3, PFN1, GRIN2B, SLC4A8, SV2B, SV2C, APBA1, BRAF, RAB39B, SLC6A13, KIF5C, GRIN2A, DOCK7, SHANK1, RPH3A, SHANK2, MARK4, PTPRO, ATF4, TENM1, VAMP7, TENM3, CHRNB4, CYFIP1, NSMF, RAB13, AHCYL2, LRRK2
GO:0055085~transmembrane transport	34	0.0963295	SLC22A17, SLC5A2, PRF1, NDUFAF6, SLC13A5, SLC6A2, SLC16A11, SLC6A4, SLC16A12, SLC37A4, ABCA2, ABCA3, SLC25A25, SLC25A45, SLC43A1, OCA2, SLC12A4, SLC22A24, ABCC11, SLC22A20, ABCC12, ABCG4, ABCC9, SLC6A5, SLC18A2, ABCC1, ABCC2, SLC25A16, SLC46A3, SLC15A4, ABCC8, SLC46A1, SLC46A2, ABCC6	GO:0005024~transforming growth factor beta-activated receptor activity	4	0.0168114	LTBP1, TGFBR1, LTBP4, TGFBR3
GO:0046872~metal ion binding	280	1.27023e-05	PDP1, HKR1, PLEKHM1, THOP1, ZNF57, ZNF781, ZGPAT, ATP2B3, ZRSR1, PATZ1, FIZ1, ZNF43, ESCO1, ZNF641, ZNF45, ZNF44, GTPBP6, ROCK1, YY2, ZNF506, ZNF507, ZNF587B, ZNF790, ZNF791, ZNF792, ZNF793, ZNF788, ZNF234, ZNF233, ZNF787, ZNF236, ZNF235, EXT2, ZNF41, ITGA2B, ZIM2, ZNF614, MFNG, ZNF516, ZNF611, ZNF131, ASAP2, MYO9B, ZNF230, ASAP3, OAS2, ZNF615, DTD1, ZNF616, ZSCAN5B, ZNF227, ACE, MUSK, ZNF226, ZN…	GO:0031012~extracellular matrix	37	0.0168615	LTBP1, LTBP2, TNC, LTBP4, PRKDC, POSTN, EDIL3, TGFB1, HMCN1, COL7A1, COMP, ADAMTS10, FBN3, TGM4, ADAMTS12, PLEC, ZP1, MMP19, FBN1, LMNA, HSPG2, MMP16, EMILIN2, COL5A1, EMILIN1, VWF, ADAMTS9, LAMA4, ADAMTS8, FBLN5, DSG1, VCAN, COL1A1, ATP5A1, LAMC1, ADAMTS3, MFAP4
GO:0000977~RNA polymerase II regulatory region sequence-specific DNA binding	37	0.00250808	ZMYND11, HNF1A, ZNF583, ARHGAP35, ZMYND8, SOHLH1, XBP1, LYL1, POU3F4, GATAD2A, CREB3L4, ZNF561, ETV5, ETV3, ALX1, DMBX1, ZNF548, ACTN4, ZFX, ZNF587B, SMAD4, DMRT2, ZNF792, ZNF793, ZBED1, NR1I2, DBP, NME1, ZNF211, ZBED4, ZNF418, PHF21B, NEUROD2, TFAP2C, ZNF256, TFAP2E, ZNF586	GO:0030900~forebrain development	10	0.0169096	NOTCH3, DLC1, STIL, DYNC2H1, MAPK8IP3, ARID1A, TOP2B, PPARGC1A, FRS2, SHH
GO:0005245~voltage-gated calcium channel activity	11	0.00807332	OPRM1, CALHM1, TMC2, CACNA1I, CACNG5, CACNG4, CACNG2, CACNB4, CACNG1, CACNA1C, CACNA1D	hsa04919:Thyroid hormone signaling pathway	18	0.0170665	ACTB, PIK3CG, TP53, ESR1, MED12, MED24, ATP1A2, MED13, CTNNB1, NOTCH3, MAPK1, PLCE1, DIO3, SLC2A1, GATA4, PIK3CA, PIK3R3, NCOR1
GO:0070588~calcium ion transmembrane transport	22	0.013675	CALHM1, TRPM4, OPRM1, SLC8A2, TMC2, TRPV2, CACNA1I, CACNG5, CACNG4, CACNG2, CACNB4, CACNG1, TRPM2, ATP2B3, PDE2A, CACNA1G, TRPC4AP, MCOLN1, MCOLN2, CACNA1C, CACNA1D, PKDREJ	GO:0008201~heparin binding	23	0.0178521	NRP2, F11, SERPINA10, LTBP2, ADAMTS15, FBN1, FGFRL1, POSTN, COL5A3, SLIT1, COL5A1, CCL7, APLP1, APOB, LPA, ADAMTS8, TENM1, NAV2, COMP, IMPG2, TGFBR3, ADAMTS3, PDCD5
GO:0007416~synapse assembly	13	0.0253753	PCDHB9, DBNL, ACHE, PCDHB6, WNT3A, SDK2, MECP2, NLGN3, CDK5, PCDHB10, NLGN4Y, DSCAM, KIRREL3	GO:0003374~dynamin polymerization involved in mitochondrial fission	4	0.017973	DNM3, DNM1L, DNM1P34, DNM2
GO:0005891~voltage-gated calcium channel complex	8	0.0263122	CACNA1I, CACNA1G, CACNG4, CACNG2, CACNB4, CACNG1, CACNA1C, CACNA1D	GO:0043931~ossification involved in bone maturation	4	0.017973	FAT4, PLXNB1, RYR1, DCHS1
GO:0008574~ATP-dependent microtubule motor activity, plus-end-directed	6	0.0288208	KIF3B, KIF17, KIF18B, KIF19, KIF16B, KIF26B	GO:0045650~negative regulation of macrophage differentiation	4	0.017973	INHBA, ZBTB46, INHA, C1QC
GO:0003924~GTPase activity	35	0.0402179	GNA13, GNAZ, RAB3A, HRAS, RAB3C, GNAI1, GNA11, GNL3L, RRAGB, GFM2, DDX3X, RAC3, MTG2, RAB11B, TGM2, GUF1, MX1, TUBG2, TUBB1, TUBB4A, GNL3, GTPBP1, GTPBP3, EFTUD2, RAB4A, EEF2, IRGC, TUBA8, GNB1, TUBD1, TUBA4A, RIT1, LRRK2, GBP3, RASD2	GO:0030199~collagen fibril organization	9	0.018067	ADAMTS14, P4HA1, PLOD3, TGFBR1, FOXC1, COL1A1, COL5A3, ADAMTS3, COL5A1
GO:0005516~calmodulin binding	29	0.0474304	PHKB, MKNK2, MYO9B, CAMKV, SRY, ATP2B3, PDE1C, CNN1, NOS2, CAMK2A, SCN5A, EWSR1, MYO5B, TRPM4, SLC8A2, STRN3, PCNT, PNCK, SPHK1, STRN4, MYO1F, DDX5, KCNN1, PLA2G6, RIT1, VAMP2, MYH14, CACNA1C, SNTA1	GO:0007399~nervous system development	37	0.0183123	PCDHA6, PCDHA7, PCDHA8, CHERP, NELL1, PCDHA5, PCDHB12, SLC7A5, APLP1, PCDHAC1, PCSK2, APOB, ROBO1, MSI1, PCDHA10, KCNQ2, BPNT1, APBA1, KIF2A, DSCAM, FZD9, FKTN, PCDHB6, ENC1, INHA, MARK4, INHBA, SLC4A10, TENM1, NAV2, ST8SIA4, ADGRV1, SCN8A, CNTN3, NEUROD6, MAB21L2, VLDLR
GO:0005524~ATP binding	181	0.0480939	XRCC2, XRCC6, AURKC, CCT2, TTL, ATP2B3, CLP1, DHX34, ORC5, STK39, TLK2, DHX35, INSR, MAP2K6, MATK, NWD1, TWF1, PDXK, BCR, ROCK1, STK24, PNCK, STK26, WNK3, RBKS, MARK3, STK4, MARK4, CDKL5, MAP4K3, PNKP, NME1, ASCC3, ATP9A, SMARCAL1, HARS, PDGFRB, RIPK4, LRRK2, SMARCA1, MYH7B, KIF26B, NMNAT1, BLM, STK11, FARS2, MAP4K1, MYO9B, CDC34, OAS2, ATP6V1B1, ABCA6, ACSBG1, ABCA5, EPHB2, CAMKV, MUSK, P2RY4, D…	hsa00500:Starch and sucrose metabolism	8	0.0189974	GBE1, PYGL, ENPP3, SI, HK2, HK1, AMY1A, G6PC2
GO:0005096~GTPase activator activity	40	0.0497959	ARFGAP3, HACD3, PREX1, ASAP2, ARHGAP35, MYO9B, ASAP3, ARFGEF1, FAM13A, ARHGAP39, ARHGAP4, TBC1D16, RGS11, CHM, TBC1D4, AXIN2, TRIP10, ARHGDIA, ELMOD1, GDI1, ARHGEF1, BCR, TBC1D10A, PLXNB1, NF1, ARHGAP28, SIPA1L3, ARHGEF15, THY1, DEPDC5, ANKRD27, TBC1D25, SGSM1, ARHGAP33, SYDE2, SYDE1, TBCD, EVI5L, LRRK2, ARAP2	GO:0016569~covalent chromatin modification	18	0.0192841	HMGN3, FOXA1, TRIM28, CECR2, CTCF, ARID1A, TET1, DAPK3, SFMBT1, BPTF, SMARCD2, BCORL1, SMARCA5, SMARCA1, DNAJC2, NCOR1, BAHD1, KDM4E
GO:0016192~vesicle-mediated transport	24	0.0522337	ARFGAP3, AP1M1, AP1M2, AP1B1, KIF17, SPTBN4, AP3S2, CECR2, STX1B, ERGIC3, VAMP7, OSBPL1A, STX16, AP3B2, TBC1D4, AP3D1, GOSR2, VAMP2, AP4B1, CCZ1, TRIP10, BCAS3, CLTCL1, MYO5B	GO:0005901~caveola	12	0.0193177	CAV3, DLC1, MAPK1, TRPC4, MLC1, NOS1, SLC2A1, BMPR2, AKAP6, ATP1A2, MYOF, BMPR1A
GO:0090394~negative regulation of excitatory postsynaptic potential	4	0.0617995	S1PR2, NLGN4X, NLGN3, LRRK2	GO:0000775~chromosome, centromeric region	11	0.0198435	DNMT3A, PPP2R1A, RAD21, PDS5B, PKHD1, NUF2, CENPE, CENPT, CTCF, SMC1A, STAG2
GO:0060079~excitatory postsynaptic potential	7	0.0701609	OPRM1, GRIN2C, GRID2, MECP2, NLGN3, LRRK2, CDK5	GO:0034673~inhibin-betaglycan-ActRII complex	3	0.0201544	ACVR2A, TGFBR3, INHA
GO:0060076~excitatory synapse	6	0.0715234	SYT11, NLGN4X, ITGA3, NLGN3, SHANK1, NETO1	GO:0042098~T cell proliferation	6	0.0211038	NCSTN, PIK3CG, CCND3, RC3H2, TNFSF14, TNFRSF4
GO:0006369~termination of RNA polymerase II transcription	12	0.0733572	NCBP1, CHTOP, CLP1, U2AF2, ALYREF, CPSF7, SNRPB, SRRM1, THOC2, SNRPE, TTF2, SNRPG	GO:0007520~myoblast fusion	6	0.0211038	KCNH1, CAV3, NOS1, DYRK1B, ADAM12, CAPN2
GO:0007268~chemical synaptic transmission	34	0.0743618	OPRM1, KCNC4, SCN1B, CPLX1, SNAP91, GRIK1, GABBR2, CACNB4, PCDHB10, HCRTR2, TPGS1, GRIN2C, APBA3, CHRNA4, KCNQ2, LRFN3, USP14, DTNA, PCDHB9, UNC119, PCDHB6, OPRL1, NPBWR2, PTPRS, PDYN, NTSR1, CDK5, GRM4, SSTR3, KCNN1, GRIA2, HTR6, CACNA1G, SLITRK5	GO:0014051~gamma-aminobutyric acid secretion	3	0.0216942	TRPC4, APBA1, CACNA1A
GO:0016079~synaptic vesicle exocytosis	6	0.0769073	RAB3A, CPLX1, DNAJC5, ADGRL1, VAMP2, CDK5	GO:0016485~protein processing	13	0.0219183	UQCRC2, CPM, MMP16, XPNPEP3, FURIN, CPN1, NCSTN, IFT172, CPXM1, DYNC2H1, ADAMTS3, PCSK4, KLK13
GO:0090263~positive regulation of canonical Wnt signaling pathway	19	0.0841499	TRPM4, CAV1, WNT3A, WLS, DAPK3, WNT2B, PSMA2, AMER1, PSMD12, RSPO1, PSMC2, DLX5, BIRC8, VPS35, SMURF2, AXIN2, LRRK2, TMEM198, RPS27A	GO:0010718~positive regulation of epithelial to mesenchymal transition	8	0.0220874	GCNT2, TGFBR1, EPB41L5, SMAD4, LEF1, COL1A1, TGFB1, CTNNB1
GO:0006813~potassium ion transport	14	0.092198	KCNK17, KCND3, KCNC4, SLC12A1, SLC12A2, KCNA6, KCNA5, KCNJ2, KCNS3, KCNJ4, KCNJ6, KCNN1, KCNK5, KCNQ2	GO:0009898~cytoplasmic side of plasma membrane	9	0.0224589	ATP2C2, GNB1L, PTPN3, DSG1, CDH1, CACNB4, BIRC2, ACP1, RNF31
GO:0007265~Ras protein signal transduction	16	0.00299134	PLD1, MAPKAPK5, MAPKAPK2, NTN1, RFXANK, CDK2, PARK7, RALGDS, PRKD1, DOK1, CDKN1A, CDKN2A, RASSF1, SDCBP, SHC1, SHC2	hsa05031:Amphetamine addiction	12	0.0224821	ATF4, ARC, PPP1CA, GRIN2B, GRIA2, GRIA1, SLC6A3, CAMK2D, GRIN2A, GRIA4, CACNA1D, CAMK2A
GO:0005229~intracellular calcium activated chloride channel activity	6	0.0159179	TTYH3, CLCA2, NMUR2, ANO2, ANO7, ANO10	GO:0005719~nuclear euchromatin	7	0.0226596	TRIM28, CECR2, RUVBL2, NSMF, ALKBH1, PPARGC1A, CTNNB1
GO:0071577~zinc II ion transmembrane transport	6	0.0267057	SLC30A4, SLC30A10, SLC30A8, SLC39A3, SLC39A2, SLC30A6	GO:0007605~sensory perception of sound	20	0.0230443	TUB, MYO3A, GABRB2, OTOGL, FAM65B, ATP2B2, USP53, NAV2, MYO15A, ADGRV1, OTOF, GRM7, CEACAM16, POU4F2, CHRNB2, COL1A1, CACNA1D, KCNQ1, USH2A, CDH23
GO:0006813~potassium ion transport	15	0.0289952	KCNMA1, KCNN4, KCNK9, CDKN1B, SLC24A4, KCNB2, CHP1, KCNJ10, AQP1, KCNIP2, KCNJ3, KCNK3, KCNV1, CDK2, KCNG2	GO:0006936~muscle contraction	17	0.0239368	CAV3, SLC8A1, MYBPC2, MYH1, CRYAB, UTRN, MYH2, MYH4, MYL12B, TTN, CACNA1S, GJC1, RYR1, MYH11, ASPH, HCN4, MYOF
GO:0000977~RNA polymerase II regulatory region sequence-specific DNA binding	30	0.0348217	HLF, MEF2A, ZNF79, E2F7, ZBTB11, ZNF154, TAL2, GATA5, HAND2, ZNF773, BCL6, NFX1, IKZF3, RFX6, RELA, TBX5, BARHL2, EOMES, ARID3A, SMAD3, ZNF549, NR1I3, ATF4, ZNF419, SP1, SP3, ZIK1, ZNF480, ZNF551, CUX1	GO:0035725~sodium ion transmembrane transport	13	0.0242099	SCN1A, SLC8A1, SLC5A5, SLC24A5, PKD2L1, SLC24A3, SLC24A1, PKD2, SLC4A7, SCN8A, SLC4A9, HCN4, SCN10A
GO:0015081~sodium ion transmembrane transporter activity	3	0.0507862	SLC23A1, ASIC4, TRAPPC10	GO:0006461~protein complex assembly	18	0.0243599	PPP2R1A, IL2RB, KMT2A, TP53, EPRS, NCKAP1L, AFG3L2, SHANK1, SOX9, PPARGC1A, LLGL1, KCNQ5, RANBP9, NUPR1, SLC2A1, LAMC1, CHAF1A, APBA1
GO:0008179~adenylate cyclase binding	4	0.0508758	CAP2, ADCYAP1R1, AKAP12, CAP1	GO:0017015~regulation of transforming growth factor beta receptor signaling pathway	6	0.026159	CAV3, TRIM33, LTBP4, SMAD4, TGFB1, BCL9
hsa05215:Prostate cancer	16	0.0509965	HSP90AB1, AR, E2F3, PIK3CB, RELA, RAF1, CDK2, CCNE2, PDPK1, ATF4, CDKN1A, CDKN1B, GSK3B, ARAF, CREB3L2, PDGFRA	GO:0034185~apolipoprotein binding	5	0.0266007	LPA, PCSK9, ABCA1, LRP4, VLDLR
GO:0035725~sodium ion transmembrane transport	13	0.0528959	SLC23A1, SLC4A11, SCN2B, SLC24A4, SCN3B, ASIC4, SLC24A1, ASIC5, SLC3A2, SLC4A7, SCNN1B, SLC8B1, TRAPPC10	GO:0050998~nitric-oxide synthase binding	5	0.0266007	ACTB, CAV3, DNM3, CAMK2D, DNM2
GO:0004879~RNA polymerase II transcription factor activity, ligand-activated sequence-specific DNA binding	8	0.0584644	PPARA, AR, NR1I3, NR1D2, RORB, HNF4G, NR5A2, STAT3	hsa04911:Insulin secretion	14	0.0267707	TRPM4, ADCY8, ADCY6, ATP1A2, RIMS2, CACNA1S, GCG, KCNU1, ATF4, SLC2A1, CAMK2D, RAPGEF4, CACNA1D, CAMK2A
hsa04370:VEGF signaling pathway	12	0.0621902	RAC2, PLCG1, PIK3CB, VEGFA, PLA2G4F, RAF1, PRKCG, MAPKAPK2, SHC2, PXN, PRKCB, PLA2G4D	GO:0031032~actomyosin structure organization	7	0.0267776	EPB41L2, EPB41L3, TRPM7, EPB41L5, EPB41L4A, CNN1, ALKBH4
GO:0006978~DNA damage response, signal transduction by p53 class mediator resulting in transcription of p21 class mediator	5	0.0656268	CDKN1A, SP100, TFAP4, CHEK2, KAT5	GO:0098909~regulation of cardiac muscle cell action potential involved in regulation of contraction	4	0.0269055	CAV3, CAMK2D, AKAP9, HCN4
GO:0046872~metal ion binding	224	0.0690346	AURKB, ZNF774, ZNF773, MIS18A, SAP30L, ZRSR2, ZNF101, POLL, CLCA2, PAN3, ZNF644, NUDT12, LIG1, ZHX3, CLEC4M, ZNF500, ATP2C1, ACAP1, ASPHD2, NEK5, ZNF79, MGAT5B, ZSCAN5A, OAS1, CHEK2, ZNF618, ZNF512, ADAP1, ZNF229, ZNF799, ZNF223, DNMT3L, FAHD2A, ZNF527, ZNF528, ASXL3, KLF7, IKZF3, GDE1, SMAD6, MGAT4C, HGD, SMYD1, ZSCAN1, U2AF1L4, ZNF627, NUBPL, ATP2A2, DZIP1L, PLA2G4F, ZIK1, TRAFD1, PPP2R3C, PLA2…	GO:0001658~branching involved in ureteric bud morphogenesis	9	0.0274831	FAT4, ADAMTS16, NPNT, PKD2, SMAD4, SOX9, DCHS1, SHH, CTNNB1
GO:0005887~integral component of plasma membrane	156	0.0715732	SLC22A16, GABRB3, GRIK2, AQP8, EFNA3, LHCGR, JAG2, TSPAN7, AQP4, SLC22A11, AQP1, AGTR2, HTR1A, KCNK9, ST3GAL5, CLEC4A, SLCO1C1, FLVCR1, TYRO3, CLCA2, CD3G, PDPN, PTPRN2, CDHR1, HTR4, MRGPRD, TMEM130, CNGA1, CLEC4M, CCR8, CCR6, ATP2C1, ROR1, PDGFRA, TMPRSS11B, KIR2DL3, KIR3DL1, PALM, PLXNC1, SLC38A3, ENPP1, GPR149, ADCYAP1R1, TRHR, BMPR2, MME, LMAN2, SLC29A1, HNRNPM, ITGAV, ICOS, SLC31A1, GAL3ST1,…	hsa04550:Signaling pathways regulating pluripotency of stem cells	20	0.0278214	PIK3CG, FZD9, HNF1A, IL6ST, WNT3A, BMPR2, SMAD4, FZD2, FZD7, CTNNB1, IGF1R, ACVR2A, INHBA, MAPK1, RIF1, PIK3CA, PIK3R3, ZFHX3, BMPR1A, KAT6A
GO:1902476~chloride transmembrane transport	15	0.0718469	GABRD, CLCN3, CLCA2, GABRB3, SLC26A1, SLC26A4, TTYH3, BEST3, SLC26A6, NMUR2, ANO2, ANO7, CLCN4, CLCN5, ANO10	GO:0017148~negative regulation of translation	11	0.0280465	EIF4ENIF1, EIF4E, ENC1, EPRS, IGF2BP1, CIRBP, ILF3, EIF2AK3, GIGYF2, DAPK3, DAPK1
GO:0005254~chloride channel activity	10	0.0795523	SLC26A4, GABRD, BEST3, TTYH3, CLCN3, SLC26A6, CLCA2, SLC26A1, CLCN4, CLCN5	GO:0017048~Rho GTPase binding	7	0.028455	PFN1, DIAPH3, AKAP13, MYO9B, LRRK2, DAAM1, DAPK3
GO:0031668~cellular response to extracellular stimulus	5	0.0944222	CDKN1A, ITGA6, CDKN2B, SFRP2, GSDMD	GO:2001241~positive regulation of extrinsic apoptotic signaling pathway in absence of ligand	5	0.0288277	PPP2R1A, INHBA, PPP1CA, SRPX, DAPK3
GO:0005524~ATP binding	163	0.0953771	RAD51D, DYNC1LI1, RAD51C, STK35, PASK, INO80, PRKG2, AURKB, PRKG1, ACSS2, ACSS3, PRKX, PRKACG, MAP3K7, CSNK2A3, ACSS1, MAP3K5, MAP3K8, EIF2B2, ITPK1, MAP2K7, ORC1, TYRO3, TNIK, PAN3, PIK3CB, LIG1, KIF5C, AARS, WNK1, MYLK2, MYH4, SARS2, RENBP, ATP2C1, BMP2K, ROR1, SMARCA5, PDGFRA, NEK5, EIF2AK3, COASY, CLCN3, ENPP1, BLK, MAPKAPK5, BMPR2, ACSBG2, OAS1, CHEK2, MAPKAPK2, NAGK, HSPA1L, DDX47, UBE2D3, …	GO:0010812~negative regulation of cell-substrate adhesion	5	0.0288277	GCNT2, TBCD, COL1A1, PTPRO, FZD7
GO:0007156~homophilic cell adhesion via plasma membrane adhesion molecules	39	5.31921e-07	DCHS2, PCDHA9, CADM1, PCDHA3, CLSTN1, PCDHGA8, PCDHB15, PCDHGA7, PCDHGA6, PCDHB11, PCDHGA3, CDH4, PCDHAC1, CDH8, CDH20, FAT3, FAT4, FAT2, PKD1, ROBO2, PCDHA12, PCDHGA12, PCDHB7, PCDHB8, PCDH11Y, PCDH10, PCDHB1, CELSR2, PCDH15, PCDH7, PCDH17, PCDHGB2, PCDHGB4, CDH13, DSG4, CDH16, CDH18, IGSF9, CDH11	GO:0032403~protein complex binding	27	0.029061	CAV3, UQCRC2, SLC6A3, WASF2, PCSK2, CUL2, RARB, MYSM1, CIITA, TUB, MLC1, FLT3, NASP, FBN1, NCKAP1L, SHANK1, RPH3A, TAB1, CPS1, ATM, VDAC1, TULP2, PPP1CA, GNB1, KRIT1, CYFIP1, DNM2
hsa04919:Thyroid hormone signaling pathway	29	1.75766e-05	CTNNB1, ACTG1, WNT4, KRAS, PLCB4, CASP9, PIK3CA, PRKACA, PIK3R1, AKT3, PIK3R2, PIK3CG, PIK3CD, TP53, MED12, ATP1A3, MED13, MED13L, NCOA1, HDAC3, EP300, MED30, NCOA3, HDAC1, DIO3, PLCG2, TSC2, MTOR, SLC9A1	GO:0031418~L-ascorbic acid binding	6	0.0290806	PLOD1, P4HA1, PLOD3, DBH, ALKBH3, OGFOD3
GO:0016020~membrane	272	8.23476e-05	ITGB3BP, KIFC1, ADCY8, PPP2R5A, PDLIM5, PPP1R21, UTRN, LUZP1, HS2ST1, CTNNB1, ACTG1, CUL3, GBF1, PIK3C3, RPL10, RAPGEF4, GLE1, ADGRB2, PIK3CG, GBP7, SLC12A9, GBP5, ATRNL1, ABCB11, KIF5A, NCF4, UBR4, MED12, MED13, MYH9, PCLO, LPCAT4, NCAPD3, MARK2, UNC13D, SCYL1, HUWE1, EIF2S1, RYR1, RYR2, BTN3A3, MYBBP1A, GNAI3, GNAI2, TFCP2L1, SORCS1, ASAP1, CAPZB, NPHP4, KRAS, GYS1, KLRF1, LFNG, IQSEC1, PTH2R, …	GO:0016337~single organismal cell-cell adhesion	16	0.0297429	EMCN, PKHD1, ICAM2, ICAM3, ZAN, CDH1, SOX9, CDH5, CTNNB1, SIGLEC1, COL19A1, ADGRV1, DSG1, PKD1, GPA33, RAPGEF1
GO:0000790~nuclear chromatin	37	0.000168296	HIST1H2AC, HIST1H2AE, SPI1, PAX6, RCC1, MEN1, KDM1A, NR1D1, DDX11, H2AFV, H2AFY, H2AFX, NFATC2, ASF1B, RUNX3, CHD4, NFATC1, DVL3, PHOX2B, TAF1, MSH6, RBBP4, CEBPB, DFFA, ASXL1, ENC1, TP53, ARID1A, MBD1, POLR3D, NRIP1, NCOA1, HDAC1, NCOA3, SMARCC1, TCF12, SMARCA4	hsa00310:Lysine degradation	10	0.0298064	DOT1L, KMT2D, KMT2A, PLOD1, EHHADH, PLOD3, KMT2C, ASH1L, AASS, COLGALT1
hsa05210:Colorectal cancer	18	0.000169148	DCC, PIK3CG, MSH6, MSH3, BRAF, PIK3CD, TP53, TGFB1, CTNNB1, KRAS, CASP9, JUN, RHOA, PIK3CA, AKT3, PIK3R1, PIK3R2, APC	hsa05213:Endometrial cancer	10	0.0298064	PIK3CG, MAPK1, BRAF, SOS1, TP53, PIK3CA, LEF1, CDH1, PIK3R3, CTNNB1
GO:0003779~actin binding	49	0.000214693	GAS2L3, CROCC, PDLIM5, RUSC1, UTRN, WASF2, VILL, VCL, NOD2, CCDC88A, MYH1, MYH2, MYO3B, ENC1, MYH7, MYH6, MYH9, JMY, TNNT3, MYRIP, MYO18B, XIRP1, XIRP2, MIB2, SCIN, SNTG1, DST, LCP1, ADD2, SPTB, GBP1, SHROOM2, ACTR3B, CAPZB, MACF1, MEFV, PLEC, SYNPO, PHACTR4, EPB41, TRPC5, MYOZ1, SHANK3, TNNI1, SYNE1, NRAP, MYPN, MYH13, MYO19	GO:0007339~binding of sperm to zona pellucida	8	0.0298585	TCP1, ZP1, ADAM2, ZAN, ADAM30, CCT3, SPAM1, PCSK4
GO:0007155~cell adhesion	73	0.00021536	ITGB3BP, CTNNAL1, PCDHA3, CLSTN1, L1CAM, MMRN1, CDSN, VCL, CTNNB1, CD96, WISP1, S1PR1, ROBO2, KIRREL2, TM9SF4, ADGRB1, ADGRE2, PTPRF, CNTNAP5, CNTN6, ADGRE5, PTPRU, AJAP1, CTNNA3, PCDHGB4, PRKD2, HEPACAM, SIGLEC8, RELN, NCAN, DST, ITGAL, ITGAE, CCR1, PTK7, PCDHB15, CTNND1, CD72, PCDHB11, CDH4, ITGAM, PCDHAC1, CDH8, VCAM1, IGSF11, SORBS3, COL7A1, COL6A3, CD22, GPNMB, LAMB1, THBS3, FN1, THBS4, APC,…	hsa04976:Bile secretion	12	0.0303307	ADCY8, SLC22A7, ADCY6, SLC2A1, SLC22A8, SLCO1B1, ABCC3, EPHX1, SLC4A2, ATP1A2, CA2, SLC10A2
GO:0016529~sarcoplasmic reticulum	12	0.000309498	TRDN, GSTM2, ANK1, NOS1, ANK3, RYR3, ATP2A1, MRVI1, RYR1, RYR2, ITPR3, THBS4	GO:0004674~protein serine/threonine kinase activity	44	0.0306628	BRSK2, PRKDC, CLK1, TTN, STK32B, SPEG, MAP3K9, EEF2K, LMTK2, CAMK2D, DYRK4, PIK3CA, LMTK3, STK19, NIM1K, CAMK2A, IRAK2, PIK3CG, TAF1, OBSCN, TNIK, BRAF, MYO3A, TRPM7, ALPK2, TGFBR1, WNK1, WNK3, MARK4, DAPK3, ATM, DAPK1, RPS6KA5, MAPK1, HUNK, ACVR2A, CDC42BPG, DYRK1B, BMP2K, HIPK4, LRRK2, EIF2AK3, BMPR1A, MAP3K11
GO:0030054~cell junction	70	0.000361793	SLC8A3, LZTS1, KCNAB2, GRIP1, GRIK3, RUSC1, UTRN, CLSTN1, SYT9, CTNNB1, ATP2B2, HMCN1, KDF1, GRIN2B, TRIM9, SHARPIN, DLG4, RHOA, SV2B, CHRNA6, CDK5RAP2, DLG2, LRRC7, SH3PXD2A, GRIN2A, PKN2, BSN, PCLO, NRIP1, XIRP1, KLHL17, XIRP2, OTOF, SCIN, IGSF9, GAP43, CPLX4, PRKCZ, ABCA7, SYNDIG1, KCNA2, KCNA1, GAD2, ATN1, LRRTM3, LRRTM1, MYZAP, AGRN, SLC30A3, FBXO45, GABRP, CPT1C, GABRE, DLGAP1, DLGAP3, EPB4…	GO:0043966~histone H3 acetylation	9	0.0312601	JADE1, BRPF1, JADE3, TADA3, PER1, BRCA2, LEF1, IRF4, KAT6A
GO:0014731~spectrin-associated cytoskeleton	6	0.000426021	ANK1, EPB41, ANK3, RHBG, SPTA1, SPTB	hsa05100:Bacterial invasion of epithelial cells	13	0.0312635	ACTB, CAV3, PIK3CG, DNM3, WASF2, CDH1, CTNNB1, CBLB, PIK3CA, PIK3R3, CLTCL1, ARHGAP10, DNM2
hsa04510:Focal adhesion	39	0.000427761	PPP1R12B, PTEN, CTNNB1, VCL, PAK6, ACTG1, IGF1R, COL6A3, RHOA, PIK3CA, LAMB1, COL11A1, AKT3, PIK3R1, THBS3, FN1, PIK3R2, THBS4, PIK3CG, EGFR, COL4A4, COL4A3, TNXB, VAV3, BRAF, MET, MYLK4, PIK3CD, ITGA2, ITGA4, HGF, FLNC, COL5A1, LAMA1, JUN, ITGA7, COL1A2, RELN, COL24A1	GO:1902476~chloride transmembrane transport	15	0.0315518	SLC12A6, SLC12A7, CLCA1, GABRB2, ANO1, CLCNKA, CLCNKB, BEST1, NMUR2, SLC26A9, ANO3, SLC4A2, SLC4A1, ANO4, ANO10
hsa04611:Platelet activation	28	0.000433854	PRKCZ, GNAI3, GNAI2, ADCY8, APBB1IP, ACTG1, FGG, PLCB4, FGA, RHOA, PIK3CA, PRKACA, COL11A1, PIK3R1, AKT3, PIK3R2, PIK3CG, PIK3CD, MYLK4, ITGA2, ITPR3, COL5A1, ITPR2, PLA2G4A, P2RX1, PLCG2, COL1A2, COL24A1	GO:0086010~membrane depolarization during action potential	7	0.0316317	SCN1A, CACNA1G, CACNA1E, SCN8A, CACNA1S, CACNA1A, SCN10A
GO:0005859~muscle myosin complex	8	0.000494984	MYH1, MYH3, MYH2, MYH13, MYH7, MYH6, TTN, MYH8	GO:0002028~regulation of sodium ion transport	6	0.0319253	SLC8A1, NOS1, CAMK2D, WNK1, PER1, TGFB1
GO:0030018~Z disc	25	0.000543082	JPH2, PPP2R5A, PPP1R12B, TTN, CAPZB, CTNNB1, ANK1, ANK2, ANK3, MYZAP, SYNPO, OBSCN, NOS1, MYOZ1, MYH7, MYH6, FLNC, MYO18B, XIRP2, RYR3, MYPN, RYR1, RYR2, DST, AKAP4	GO:0055117~regulation of cardiac muscle contraction	6	0.0319253	CAV3, NOS1, ADRA1B, ADRA1A, HCN4, SCN10A
hsa05213:Endometrial cancer	15	0.000765788	PIK3CG, EGFR, BRAF, PIK3CD, TP53, PTEN, CTNNA3, CTNNB1, KRAS, CASP9, PIK3CA, AKT3, PIK3R1, PIK3R2, APC	GO:0005871~kinesin complex	10	0.0319506	KIF1C, KIF13A, NDE1, KIF5C, CENPE, KIF19, KIF16B, KIF21A, KIF26B, KIF2A
GO:0051015~actin filament binding	27	0.000817644	CTNNAL1, TRIOBP, SHROOM2, SHROOM4, HIP1R, UTRN, ARPC5, TTN, CAPZB, ESPN, ACTR3, BLOC1S6, MACF1, EGFR, MYH3, MYO1E, MYH9, FLNC, MYH8, CTNNA3, SYNE1, KLHL17, SCIN, SPTA1, LCP1, ADD2, SPTB	GO:0014704~intercalated disc	9	0.0328345	CAV3, SLC8A1, SCN1A, MYH1, CAMK2D, AKAP6, ATP1A2, FHOD1, GJC1
hsa00562:Inositol phosphate metabolism	18	0.000949073	PIK3CG, IMPAD1, PIK3CD, PI4KA, PIP5K1C, ITPKB, OCRL, PTEN, TPI1, PLCB4, PLCH2, PLCG2, PLCH1, PIKFYVE, PIK3C3, PIK3CA, INPP5B, PIP4K2C	GO:0030286~dynein complex	6	0.0333338	DNAH11, DNAH17, DYNC2H1, DNHD1, DNAH1, DNAH8
hsa05205:Proteoglycans in cancer	37	0.000960871	ERBB4, MMP9, PPP1R12B, RPS6KB2, DCN, TGFB1, CTNNB1, ACTG1, IGF1R, WNT4, KRAS, ANK1, ANK2, ANK3, RHOA, PIK3CA, PRKACA, AKT3, PIK3R1, FN1, PIK3R2, PIK3CG, EGFR, BRAF, MET, PIK3CD, TP53, HSPG2, ITGA2, HGF, FLNC, ITPR3, FZD4, ITPR2, PLCG2, MTOR, SLC9A1	GO:0004970~ionotropic glutamate receptor activity	5	0.0338775	GRIA2, GRIA1, GRIK3, GRIN2A, GRIA4
GO:0005201~extracellular matrix structural constituent	17	0.000982737	COL4A4, COL4A3, HAPLN1, TNXB, ELN, MUC6, COL5A1, LAMA1, FBLN1, COL1A2, FBN3, MUC5AC, COL24A1, LAMB1, NCAN, COL11A1, MUC5B	GO:0016600~flotillin complex	4	0.0342267	SLC6A3, CDH1, LRP4, CTNNB1
GO:1904837~beta-catenin-TCF complex assembly	13	0.00105522	KMT2D, TLE3, TLE4, CDC73, TLE1, CTNNB1, MEN1, EP300, HDAC1, HIST1H4E, BCL9L, RUVBL1, SMARCA4	hsa05146:Amoebiasis	16	0.0342379	COL4A4, PIK3CG, MUC2, COL5A3, ITGAM, TGFB1, COL5A1, LAMB4, LAMA4, LAMA3, LAMC3, COL27A1, PIK3CA, LAMC1, COL1A1, PIK3R3
GO:0008340~determination of adult lifespan	7	0.00110271	MSH6, TFCP2L1, IDE, TP53, PRDM2, RAD54L, ATM	GO:0004672~protein kinase activity	42	0.034763	FASTKD1, BRSK2, PRKDC, CAD, CLK1, SOX9, TTN, SGK223, STK32B, MAP3K9, TEK, EEF2K, CDK12, DYRK4, LMTK3, NIM1K, CAMK2A, MAP2K7, PIK3CG, OBSCN, TNIK, MYO3A, BRAF, TGFBR1, TRIM28, WNK1, WNK3, SCYL3, DAPK3, DAPK1, TYK2, RPS6KA5, HUNK, DYRK1B, BMP2K, ROR2, HIPK4, LRRK2, KSR1, EIF2AK3, FASTKD5, MAP3K11
GO:0005856~cytoskeleton	57	0.00111128	GAS2L3, CTNNAL1, KCNAB2, S100A8, HIP1R, S100A9, UTRN, WASF2, PTPN21, VCL, ACTG1, NOD2, FRMD5, ANK1, ANK2, TRIM9, RHOA, CDK5RAP2, DHCR24, ENC1, FLNC, BICD2, PCLO, MARK1, CTNNA3, BICD1, JMY, FNBP1L, CC2D2A, SCIN, NEK8, SNTG1, DST, ADD2, AKAP4, ACTBL2, SHROOM2, CAPZB, APBB1IP, DOCK2, SORBS3, NPHP4, MACF1, DNAI1, PPL, TRIP11, PLEC, UBXN11, NOS1, EPB41, MYO1E, ACTL9, SYNE1, TENM1, FAAH, NINL, JAK1	GO:0001843~neural tube closure	13	0.0351486	DLC1, STIL, KDM6A, SHROOM3, PHACTR4, MED12, CECR2, ARID1A, TEAD2, CELSR1, TGFB1, PFN1, IFT172
hsa04070:Phosphatidylinositol signaling system	22	0.00120296	PIK3CG, IMPAD1, PIK3CD, PI4KA, DGKK, PIP5K1C, ITPKB, DGKI, ITPR3, OCRL, PTEN, ITPR2, DGKA, PLCB4, PLCG2, PIKFYVE, PIK3C3, PIK3CA, INPP5B, PIP4K2C, PIK3R1, PIK3R2	GO:0015701~bicarbonate transport	9	0.0353772	SLC4A10, BEST1, SLC26A9, SLC4A8, SLC4A7, SLC4A2, SLC4A1, SLC4A9, CA2
GO:1903779~regulation of cardiac conduction	15	0.0013679	SLC8A3, NOS1, ATP1A3, FPGT-TNNI3K, ITPR3, ITPR2, TRDN, ATP2B2, RYR3, ATP2A1, RYR1, RYR2, TNNI3K, AHCYL1, PRKACA	GO:0007215~glutamate receptor signaling pathway	5	0.0366517	GRIN2B, KCNB1, GRIK3, GRIN2A, GRIA4
GO:0016337~single organismal cell-cell adhesion	22	0.00138958	EGFR, COL13A1, ZAN, PIP5K1C, FBLIM1, CTNND1, CRNN, PTPRU, CDSN, PKD1L1, CTNNA3, CTNNB1, VCAM1, SIGLEC1, DSG4, NPHP4, KIRREL, PKD1, GPA33, DLG5, KIRREL2, NEGR1	GO:0048617~embryonic foregut morphogenesis	4	0.0377731	EPB41L5, GATA4, SHH, CTNNB1
hsa05146:Amoebiasis	23	0.00144688	COL4A4, PIK3CG, COL4A3, RAB5C, PIK3CD, ITGAM, COL5A1, TGFB1, VCL, C8A, SERPINB9, LAMA1, GNAL, PLCB4, COL1A2, PIK3CA, PRKACA, COL24A1, LAMB1, COL11A1, PIK3R1, FN1, PIK3R2	GO:0043025~neuronal cell body	37	0.0386574	KCNH1, SCN1A, AGFG1, IL6ST, SLC6A3, CRTC1, BMPR2, AKAP9, CAD, RIC3, TGFB1, ALCAM, ATP2B2, APOB, SOS1, CAMK2D, SNAP47, BRINP3, ADCY10, KNDC1, TUBB4A, TRPM4, C4B, ENC1, INHA, NRXN1, PPARGC1A, SHANK2, KCNK2, CYBB, SLC4A10, PPP1R9A, GRIA1, LRRK2, CACNA1A, LRP4, BMPR1A
GO:0005942~phosphatidylinositol 3-kinase complex	7	0.00145183	PIK3CG, PIK3CD, PIK3C3, PIK3CA, MTOR, PIK3R1, PIK3R2	GO:0004971~AMPA glutamate receptor activity	3	0.039037	GRIA2, GRIA1, GRIA4
GO:0016477~cell migration	32	0.00152259	PRKCZ, SHROOM2, TSPAN1, ERBB4, FUT8, PTK7, BDKRB1, ARPC5, PTEN, TGFB1, CUL3, S1PR1, RHOA, NFATC2, USP33, APC, CCDC88A, ADGRE2, PTPRF, NOX1, BRAT1, ELMO2, EPHA2, COL5A1, SSTR4, JAK1, TGFBR3, FOXC1, USP24, SPATA13, LCP1, SLC9A1	GO:0017150~tRNA dihydrouridine synthase activity	3	0.039037	DUS2, DUS1L, DUS3L
hsa04512:ECM-receptor interaction	20	0.00160121	COL4A4, COL4A3, TNXB, HSPG2, ITGA2, ITGA4, COL5A1, LAMA1, ITGA7, COL6A3, COL1A2, RELN, SV2B, AGRN, LAMB1, COL24A1, COL11A1, THBS3, FN1, THBS4	GO:0004677~DNA-dependent protein kinase activity	3	0.039037	PRKDC, HMGA2, ATM
hsa05231:Choline metabolism in cancer	22	0.00179595	EGFR, PIK3CG, SLC44A4, SLC44A5, PIK3CD, WASF2, DGKK, PIP5K1C, RPS6KB2, DGKI, DGKA, PLA2G4A, KRAS, JUN, TSC2, SLC22A3, PIK3CA, MTOR, SLC22A2, AKT3, PIK3R1, PIK3R2	GO:0005905~clathrin-coated pit	10	0.0394755	AP1S3, EPN3, CUBN, DNM1L, LRP12, CLTCL1, LRP3, SGIP1, DNM2, VLDLR
hsa04662:B cell receptor signaling pathway	17	0.00190377	PIK3CG, CR2, VAV3, NFKBIE, PIK3CD, CD72, KRAS, JUN, PLCG2, CD22, PIK3CA, CD79A, NFATC2, AKT3, PIK3R1, NFATC1, PIK3R2	GO:0004714~transmembrane receptor protein tyrosine kinase activity	8	0.0398925	IGF1R, FLT1, FLT3, TEK, AXL, ROR2, EPHA2, INSRR
hsa04670:Leukocyte transendothelial migration	24	0.00191468	PIK3CG, ITGAL, ITK, GNAI3, VAV3, GNAI2, MMP9, NCF4, PIK3CD, CTNND1, CLDN20, ITGA4, ITGAM, CTNNA3, CTNNB1, VCL, VCAM1, ACTG1, PLCG2, RHOA, PIK3CA, RAPGEF4, PIK3R1, PIK3R2	GO:0005859~muscle myosin complex	5	0.0404409	MYH1, MYH2, MYH11, MYH4, TTN
GO:0048015~phosphatidylinositol-mediated signaling	22	0.00259883	PIK3CG, EGFR, ERBB4, PIK3CD, PI4KA, KIT, PTEN, IGF1R, PRR5, PLCH1, PIK3C3, RHOA, AGO1, PIK3CA, AGO3, MUC5AC, MTOR, NRG2, PIK3R1, PIK3R2, NGF, EXOC1	GO:0032982~myosin filament	5	0.0404409	MYH1, MYBPC2, MYH2, MYH11, MYH4
GO:0000146~microfilament motor activity	8	0.00273894	MYH3, MYO1E, MYH2, MYH13, MYH7, MYH6, MYH9, MYH8	GO:0034121~regulation of toll-like receptor signaling pathway	3	0.0408754	ESR1, GFI1, BIRC2
GO:0005887~integral component of plasma membrane	173	0.00320444	SLC8A3, CASR, PLXNA4, TSPAN1, CADM1, AQP9, GRIK3, TNFSF15, KIAA1324, NPY4R, LPAR3, CNGB1, ZNRF3, MARCO, ATP2B2, SLC2A5, GRIN2B, MRGPRX1, KCNK7, S1PR4, HTR1D, ADGRB1, SLC4A3, HTR1E, SLC12A6, PTPRF, CLCA4, ABCB11, PTPRH, SCN2A, GRIN2A, PROKR2, PROKR1, PTPRU, HLA-DQA2, SLC34A2, SSTR4, IGSF6, LILRB3, LRP12, RYR1, SLC2A12, SLC38A4, SLC2A13, CYSLTR1, SYNDIG1, DRD3, CYSLTR2, DRD5, KCNA2, KCNA1, PTK7, BD…	GO:0002943~tRNA dihydrouridine synthesis	3	0.0408754	DUS2, DUS1L, DUS3L
GO:0032982~myosin filament	7	0.00324964	MYH1, MYH3, MYH2, MYH13, MYH7, MYH6, MYH8	GO:0002328~pro-B cell differentiation	3	0.0408754	FLT3, PRKDC, LIG4
hsa04730:Long-term depression	15	0.00336884	IGF1R, PLA2G4A, PLCB4, GNAI3, KRAS, NOS1, BRAF, GNAI2, GRIA1, PPP2CB, RYR1, ITPR3, GRM1, CACNA1A, ITPR2	GO:0043197~dendritic spine	15	0.0411169	DNM3, ARC, SLC8A1, NOS1, SYNDIG1, CRYAB, IGF2BP1, ATP1A2, ARFGEF2, SHANK1, PTPRO, SHANK2, GRM3, PPP1CA, GRIA1
hsa04973:Carbohydrate digestion and absorption	12	0.00349275	PIK3CG, SLC2A5, PIK3CD, SI, MGAM, ATP1A3, PIK3CA, TAS1R3, TAS1R2, PIK3R1, AKT3, PIK3R2	GO:0046872~metal ion binding	199	0.0413828	ADCY8, ADCY6, ZNF781, POSTN, CIAPIN1, ATP2B2, ZNF778, ZNF777, BRPF1, ZNF45, CLCA1, ZNF44, CRYAB, LIG4, CLEC4M, ZNF37A, ATP2C2, PPP1CA, PRDM5, ROR2, EXT1, ZNF41, ZNF516, ENPP3, AKAP13, MYO9B, RIMS2, ZNF616, ZNF226, ZNF225, ZNF224, ZNF71, LFNG, MOCS1, DNMT3A, ZNF623, ZBTB46, TGFBR1, ACACA, SMAD4, ANKMY1, ZNF525, ATP13A5, ZFHX4, ZNF213, ZNF219, ZNF19, NRP2, ZNF536, ARSD, ZNF518B, SMPDL3B, ZFAT, TOP2…
GO:0016323~basolateral plasma membrane	31	0.00350567	KCNJ16, AQP9, LDLR, ERBB4, CADM1, RHBG, ATP12A, CTNNB1, NOD2, SLC29A2, ANK1, ANK2, ANK3, DLG4, PKD1, KCNQ1, DLG2, SLC12A6, EGFR, LPO, MLC1, SLCO4C1, SLC22A9, VANGL2, AJAP1, TFRC, CDH16, OTOF, SLCO1B1, MAP7, SLC9A1	GO:0019898~extrinsic component of membrane	13	0.0418845	WDFY3, EPB41L2, EPB41L3, MTMR3, PTPN3, VPS13D, EPB41L5, EPB41L4A, SNX32, SNX4, RPH3A, JAKMIP1, MUC16
GO:0055117~regulation of cardiac muscle contraction	8	0.00396494	NOS1, ANK2, FPGT-TNNI3K, TNNI3K, RYR2, PRKACA, RNF207, GJA5	GO:0051965~positive regulation of synapse assembly	11	0.0422059	SLITRK2, LINGO2, AMIGO2, SLITRK4, CBLN2, SYNDIG1, LRRN3, LRTM2, CLSTN1, EEF2K, NRXN1
GO:0050680~negative regulation of epithelial cell proliferation	14	0.00403883	PAX6, CDC73, PTEN, TGFB1, ATF2, MEN1, PEX2, IFT172, PTN, TGFBR3, IFT52, KRT4, RUNX3, IFT74	GO:0006396~RNA processing	15	0.0430925	CHERP, DICER1, YTHDC2, SF3A1, BICD1, ZFC3H1, SFSWAP, RCL1, DDX17, SUGP1, LARP7, DHX34, RBMS2, RBM39, DHX30
GO:0007507~heart development	32	0.00408141	DNAH11, ERBB4, CAD, PTEN, TGFB1, DNAH5, ZFP36L1, C1ORF127, ECE1, DNAI1, HEXIM1, GYS1, PTN, PKD1, TBC1D32, IFT140, FLRT3, ALPK3, MED12, SMYD2, MBD1, ATM, EP300, XIRP1, KCNJ8, XIRP2, SALL1, TSC2, CC2D2A, NEK8, FOXC1, IFT74	hsa04728:Dopaminergic synapse	18	0.0431624	PPP2R1A, SCN1A, GNAI1, SLC6A3, KIF5C, GRIN2A, GRIA4, ITPR1, PPP1CA, ATF4, GRIN2B, GRIA2, GNB1, GRIA1, CAMK2D, CACNA1D, CAMK2A, CACNA1A
GO:0005874~microtubule	47	0.00433623	SLC8A3, GAS2L3, DNAH11, DNAH10, KIFC1, SHROOM2, KIF25, KCNAB2, RUSC1, DNAH17, FAM110C, EHHADH, DNAH3, TTLL7, STAU2, DNAH5, KIF2B, KIF13A, KIF2C, HSPH1, CEP57, DNAI1, MACF1, MEFV, DYNC2H1, TEKT2, ODF2, CDK5RAP2, TUBG1, KIF21A, TUBB3, MTUS2, GOLGA2, APC, KIF5A, MAP1A, MAP1B, GAS8, MID1, CENPJ, KIF1C, MAP2, CCT8, NINL, TUBA4B, MAP7, DNM2	hsa04971:Gastric acid secretion	12	0.0435998	GNAI1, ADCY8, ADCY6, CAMK2D, KCNE2, SLC4A2, ATP1A2, CA2, CAMK2A, KCNQ1, KCNK2, ITPR1
hsa04974:Protein digestion and absorption	19	0.00445794	COL4A4, SLC8A3, COL4A3, SLC15A1, COL21A1, COL13A1, ELN, ATP1A3, COL5A1, XPNPEP2, COL7A1, COL6A3, COL1A2, CPA2, CELA2B, CELA2A, COL24A1, KCNQ1, COL11A1	hsa04910:Insulin signaling pathway	19	0.044523	IRS4, PIK3CG, BRAF, INPPL1, ACACA, HK2, HK1, PPARGC1A, G6PC2, PPP1R3D, MAPK1, CBLB, PPP1CA, EIF4E, PYGL, SOS1, PIK3CA, PIK3R3, RAPGEF1
GO:0014069~postsynaptic density	31	0.00486527	LZTS1, SYNDIG1, KCNAB2, HIP1R, RUSC1, PDLIM5, CLSTN1, PLCB4, SHARPIN, DLG4, ADGRB1, FBXO45, LRRC7, DLG2, SYNPO, DLGAP1, DLGAP3, MAP1B, GRIN2A, BSN, GRM1, PCLO, SHANK3, ARF1, KLHL17, GRIA1, LRP8, GAP43, LRP4, ADD2, DNM2	GO:0019933~cAMP-mediated signaling	8	0.0446505	ADCY8, ADCY6, ADGRG6, AKAP6, RAPGEF4, RIMS2, SOX9, KSR1
hsa05223:Non-small cell lung cancer	14	0.00487152	PIK3CG, EGFR, BRAF, PIK3CD, TP53, ALK, KRAS, CASP9, PLCG2, PIK3CA, RARB, AKT3, PIK3R1, PIK3R2	GO:0005581~collagen trimer	14	0.0449128	COL4A4, COL9A2, COL19A1, COL6A6, COL7A1, GLDN, P4HA1, COL27A1, FCN1, COL1A1, EMILIN2, C1QC, COL5A1, EMILIN1
hsa05221:Acute myeloid leukemia	14	0.00487152	PIK3CG, BRAF, PIK3CD, SPI1, RUNX1T1, RPS6KB2, KIT, ZBTB16, KRAS, PIK3CA, MTOR, AKT3, PIK3R1, PIK3R2	GO:0051056~regulation of small GTPase mediated signal transduction	19	0.0450193	DLC1, OBSCN, AKAP13, ARHGEF17, MYO9B, RACGAP1, FAM13A, VAV1, ARHGAP39, STARD13, RALGAPA1, ARHGAP33, TIAM2, GMIP, SOS1, ARAP1, SRGAP1, ARHGAP9, ARHGAP10
GO:0003677~DNA binding	204	0.00495651	MXI1, HMGN4, RFXAP, ZNF777, BRPF1, H2AFV, DDX11, H2AFY, H2AFX, RARB, TFPT, ZNF646, LIG4, PRDM8, RFC5, RFC3, UHRF2, MTF1, HUWE1, SCYL1, JUN, ZZZ3, TGIF2, PRDM2, MYBBP1A, ZIM3, ZNF77, GPBP1L1, ZNF76, MYEF2, AHRR, CASZ1, PBRM1, LHX8, POLQ, ASXL2, ZBTB48, TP53BP1, ASXL1, ZNF521, ATR, RAD54L, GCFC2, ATM, RERE, AHDC1, LZTS1, ZBTB39, ZEB2, YBX1, FANCM, ZNF683, SERPINA3, CSDC2, ZFP36, ZNF33A, ZNF285, GME…	GO:0035264~multicellular organism growth	13	0.0453791	STIL, KDM6A, AR, DUOX2, TNKS2, SLC4A10, DHCR7, SOS1, RC3H2, RARB, PALB2, GIGYF2, APBA1
GO:0043491~protein kinase B signaling	10	0.0051719	ZFP36L1, TSC2, AXL, PIK3CA, RPS6KB2, SESN2, PTEN, TGFB1, EPHA2, SETX	GO:0007405~neuroblast proliferation	5	0.0455759	FZD9, NDE1, RACGAP1, FRS2, SHH
GO:0004386~helicase activity	18	0.00521288	SMARCAD1, DICER1, HELZ, RAD54L, DDX6, FANCM, DNA2, DDX11, DDX23, NAV2, EIF4H, DDX24, DDX3Y, DDX50, DDX31, SRCAP, HFM1, SMARCA4	GO:0043044~ATP-dependent chromatin remodeling	6	0.0456749	ACTB, SMARCD2, SMARCA5, CECR2, ARID1A, SMARCA1
GO:0000226~microtubule cytoskeleton organization	16	0.00543574	GAS2L3, PRKCZ, MAP1A, MAP1B, ULK4, MID1, MARK1, MARK2, MAP2, NINL, MAP7, CDK5RAP2, TUBG1, MAP7D1, DST, MAP7D3	GO:0001527~microfibril	4	0.0458915	LTBP1, FBN1, ADAMTS10, MFAP4
GO:0006661~phosphatidylinositol biosynthetic process	14	0.0055506	PIK3CG, PIK3CD, PI4KA, PIP5K1C, OCRL, PTEN, ARF1, PLCG2, PIK3C3, PIKFYVE, PIK3CA, PIP4K2C, PIK3R1, PIK3R2	hsa04723:Retrograde endocannabinoid signaling	15	0.0463731	GNAI1, ADCY8, GABRB2, ADCY6, GRIA4, CACNA1S, GRM1, ITPR1, MAPK1, GRIA2, GNB1, GRIA1, CNR1, CACNA1D, CACNA1A
GO:0050681~androgen receptor binding	11	0.00598308	KDM1A, NCOA1, EP300, NCOA3, GRIP1, CDK7, BRCA1, NRIP1, CTNNB1, SMARCA4, KDM5D	GO:0017124~SH3 domain binding	17	0.0466609	KHDRBS3, TP53BP2, INPPL1, WASF2, EFS, SHANK1, SIRPA, SHANK2, DOCK4, SH3BP5L, CBLB, SOS1, QKI, ADAM12, RAPGEF1, DNM2, SGIP1
GO:0019228~neuronal action potential	9	0.00607816	CATSPER4, P2RX1, ANK3, KCNA2, SCN2A, KCNA1, SCN11A, SCN7A, SCN4A	hsa05212:Pancreatic cancer	11	0.0468576	PIK3CG, MAPK1, BRAF, TGFBR1, TP53, SMAD4, BRCA2, PIK3CA, PIK3R3, TGFB1, RALGDS
GO:0086010~membrane depolarization during action potential	9	0.00607816	CATSPER4, CATSPER1, SCN2A, CACNA1E, SCN11A, NALCN, SCN7A, CACNA1A, SCN4A	GO:0031702~type 1 angiotensin receptor binding	4	0.0474866	GNA13, TYK2, GNB1, ARAP1
hsa05230:Central carbon metabolism in cancer	15	0.0062369	PDK1, PIK3CG, EGFR, MET, PIK3CD, TP53, KIT, PTEN, GLS2, KRAS, PIK3CA, MTOR, AKT3, PIK3R1, PIK3R2	GO:0048010~vascular endothelial growth factor receptor signaling pathway	12	0.0481436	ACTB, NRP2, CYBB, FLT1, WASF2, BMPR2, AXL, CYFIP1, PIK3CA, NCKAP1L, FOXC1, VAV1
hsa05100:Bacterial invasion of epithelial cells	17	0.00692224	PIK3CG, MET, WASF2, PIK3CD, ARPC5, CLTC, CTNNA3, ELMO2, VCL, CTNNB1, ACTG1, RHOA, PIK3CA, PIK3R1, FN1, DNM2, PIK3R2	GO:0030666~endocytic vesicle membrane	11	0.0491006	GRIA2, GRIA1, WNT3A, CAMK2D, GRIA4, STAB2, CAMK2A, SCARF1, DNM2, HLA-DRA, CD163
hsa04915:Estrogen signaling pathway	20	0.00727412	EGFR, PIK3CG, GNAI3, GNAI2, ADCY8, MMP9, PIK3CD, ITPR3, GRM1, ATF2, ITPR2, PLCB4, KRAS, JUN, PIK3CA, PRKACA, HSPA8, AKT3, PIK3R1, PIK3R2	GO:0008092~cytoskeletal protein binding	9	0.0492132	SLC8A1, PTPN3, EPB41L5, PKD2, EPB41L4A, PPP1R42, CAPN2, FLNC, PKD2L1
GO:0035418~protein localization to synapse	6	0.00747711	LRRTM1, DLG4, ASIC2, BSN, RELN, PCLO	GO:0043967~histone H4 acetylation	7	0.0494816	TADA3, PER1, BRCA2, LEF1, RUVBL2, IRF4, EP400
GO:0030521~androgen receptor signaling pathway	11	0.00771234	NCOA1, MED30, NCOA3, GRIP1, MED12, ARID1A, CDK7, MED13, BRCA1, NRIP1, CTNNB1	hsa05033:Nicotine addiction	8	0.0496283	GRIN2B, GRIA2, GRIA1, GABRB2, GRIN2A, CHRNB2, GRIA4, CACNA1A
GO:0001889~liver development	16	0.00807723	UPF2, ONECUT1, CADM1, OTC, CAD, HGF, WNT4, BAAT, KRAS, JUN, PKD1, PTN, PCSK9, TGFBR3, PIK3CA, HMGCL	GO:0007507~heart development	24	0.0501874	NRP2, DNAH11, TGFBR1, FBN1, MED12, PRKDC, AKAP13, CAD, SPARC, TGFB1, SHH, DNAH5, ATM, PLCE1, XIRP1, ROBO1, XIRP2, NCOA6, TEK, PKD2, PKD1, STRA6, FOXC1, MTERF4
GO:0030317~sperm motility	13	0.00811674	DNAH11, CATSPERD, GAS8, DNAH5, SPEM1, NPHP4, APOB, CATSPER4, DNAI1, CATSPER1, TEKT2, INPP5B, AKAP4	GO:0033148~positive regulation of intracellular estrogen receptor signaling pathway	4	0.0505227	KMT2D, AR, DDX17, FOXA1
GO:1903561~extracellular vesicle	12	0.00913592	OLFML3, FGA, TFRC, GNAI2, IFT172, COL6A3, MAN1B1, ATP1A3, GRIA4, CLTC, LFNG, VCL	GO:0008593~regulation of Notch signaling pathway	4	0.0505227	IL6ST, POSTN, LFNG, LLGL1
GO:0042383~sarcolemma	17	0.00929639	SLC8A3, NOS1, UTRN, ATP1A3, FLNC, VCAM1, SLC2A5, ANK1, ANK2, KCNJ8, ANK3, RYR3, COL6A3, RYR1, RYR2, AHNAK, PLEC	hsa05211:Renal cell carcinoma	11	0.0512103	PIK3CG, MAPK1, CUL2, BRAF, SOS1, ARNT2, SLC2A1, PIK3CA, PIK3R3, RAPGEF1, TGFB1
GO:0007368~determination of left/right symmetry	13	0.00942779	DNAH11, STIL, BBS7, DNAH5, RTTN, C1ORF127, DNAI1, CC2D2A, DYNC2H1, NEK8, TBC1D32, IFT74, IFT140	hsa05414:Dilated cardiomyopathy	13	0.0513064	ACTB, ITGA9, ADCY8, CACNG7, ADCY6, LMNA, SGCD, CACNB4, TTN, CACNA2D3, CACNA1D, CACNA1S, TGFB1
GO:0030011~maintenance of cell polarity	4	0.00944077	NCKAP1L, ARPC5, DST, SLC9A1	GO:0042383~sarcolemma	13	0.052897	CAV3, KCND3, SLC8A1, NOS1, KCNB1, UTRN, FLNC, ABCC9, RYR1, AHNAK2, SGCD, AHNAK, PLEC
GO:0016525~negative regulation of angiogenesis	14	0.00991215	COL4A3, KLK3, DCN, SPINK5, EPHA2, HHEX, PTN, HRG, FOXC1, TIE1, ADGRB1, ADGRB3, ADGRB2, THBS4	GO:0003774~motor activity	11	0.0529291	KIF1C, MYH1, MYO3A, MYO15A, CCDC102A, MYH2, DYNC2H1, MYH11, MYO9B, DYNLT1, KIF2A
hsa04380:Osteoclast differentiation	24	0.0101643	CALCR, PIK3CG, NOX3, NCF4, CSF1, NOX1, RELB, PIK3CD, SPI1, TGFB1, LILRB1, LILRA1, JUN, LILRA4, LILRB3, PLCG2, JAK1, PIK3CA, NFATC2, IL1A, AKT3, PIK3R1, PIK3R2, NFATC1	GO:0007173~epidermal growth factor receptor signaling pathway	10	0.0533547	RPS6KA5, CBLB, PLCE1, EPS8, SOS1, PIK3CA, PIGR, KIF16B, SOX9, TGFB1
GO:0008022~protein C-terminus binding	30	0.0109236	ITGB3BP, CEP120, GRIP1, FPGT-TNNI3K, ZBTB16, CTNNB1, ATP2B2, HIC2, PPP2CB, DLG4, PEX10, ERCC2, RBFOX1, SASH1, HPCAL4, MED12, HSPG2, CENPF, CDC20, CDK7, LIG4, SHANK3, ATXN1, FBLN1, EP300, SNTG1, VGLL2, TNNI3K, IFT52, DST	GO:0035235~ionotropic glutamate receptor signaling pathway	6	0.0536829	GRIN2B, GRIA2, GRIA1, GRIK3, GRIN2A, GRIA4
GO:0001843~neural tube closure	16	0.0116507	STIL, KDM6A, PHACTR4, VANGL2, MED12, ARID1A, GRHL3, TRIM71, TGFB1, MTHFD1L, SALL4, IFT172, CC2D2A, TSC2, PRKACA, SETD2	hsa05222:Small cell lung cancer	13	0.0553397	COL4A4, PIK3CG, LAMB4, LAMA4, LAMA3, LAMC3, TP53, BIRC7, PIK3CA, RARB, LAMC1, PIK3R3, BIRC2
GO:0043552~positive regulation of phosphatidylinositol 3-kinase activity	9	0.0116672	NOD2, VAV3, ERBB4, EPHA8, SH3GLB1, ATG14, KIT, AMBRA1, TGFB1	GO:0051497~negative regulation of stress fiber assembly	5	0.0555984	DLC1, PFN1, PPP1R9A, WASF2, ARAP1
GO:0030032~lamellipodium assembly	9	0.0116672	CDH13, CCDC88A, VAV3, S1PR1, WASF2, KIT, SPATA13, CAPZB, VCL	GO:0050908~detection of light stimulus involved in visual perception	5	0.0555984	CCDC66, BEST1, EYS, GRM6, RGS9BP
GO:0005911~cell-cell junction	28	0.0119109	PRKCZ, CADM1, PTK7, CTNND1, KIT, CDSN, CTNNB1, VCL, ACTR3, NPHP4, KIRREL, PIKFYVE, ADGRB1, PIK3R1, PCDHGA12, FLRT3, ITK, CNKSR1, MLC1, COL13A1, MYO1E, VANGL2, MYH2, PTPRU, FZD4, HEPACAM, GPA33, PDZD2	GO:0015012~heparan sulfate proteoglycan biosynthetic process	5	0.0555984	EXTL3, XYLT2, NDST2, EXT1, EXTL1
GO:0044224~juxtaparanode region of axon	5	0.0126865	KCNAB2, KCNA2, KCNA1, DLG4, DLG2	GO:0001508~action potential	5	0.0555984	USP53, KCNB1, CHRNB4, AKAP6, CHRNB2
GO:0034644~cellular response to UV	11	0.0128393	KDM1A, TAF1, EP300, CASP9, EIF2S1, TP53, USP47, PTN, ATR, PIK3R1, TP73	GO:0032331~negative regulation of chondrocyte differentiation	5	0.0555984	TGFBR1, RARB, ADAMTS12, SOX9, CTNNB1
GO:0004714~transmembrane receptor protein tyrosine kinase activity	10	0.0128436	EGFR, IGF1R, ERBB4, MET, AXL, TIE1, KIT, ALK, EPHA2, INSRR	hsa05219:Bladder cancer	8	0.0556472	RPS6KA5, MAPK1, BRAF, MMP9, TP53, CDH1, DAPK3, DAPK1
GO:0072583~clathrin-mediated endocytosis	7	0.0132125	AP2A2, FNBP1L, HIP1R, PIP5K1C, CANX, AP2M1, GAK	hsa05412:Arrhythmogenic right ventricular cardiomyopathy (ARVC)	11	0.0558243	ACTB, ITGA9, CACNG7, LMNA, SGCD, LEF1, CACNB4, CACNA2D3, CACNA1D, CACNA1S, CTNNB1
hsa04068:FoxO signaling pathway	24	0.0132423	EGFR, PIK3CG, RBL2, BRAF, NLK, PIK3CD, PRKAG2, RAG1, RAG2, GRM1, PTEN, ATM, TGFB1, IGF1R, S1PR1, EP300, KRAS, CSNK1E, S1PR4, PIK3CA, PRKAA2, AKT3, PIK3R1, PIK3R2	GO:0043565~sequence-specific DNA binding	56	0.0563403	ELF4, HOXD12, CTCF, FOXS1, PGR, GATA4, SPIB, FOXB2, HSF4, RARB, ALX3, AR, TP53, ESR1, TTF1, LEF1, FOXN2, PPARGC1A, RFC1, BPTF, HNF4A, PRDM5, DPRX, FOXG1, HOXD4, NFE2L1, FOXC1, ZNF516, NR3C2, RAG1, CTCFL, SOX7, CXXC5, HIC1, HOXA10, ZSCAN23, FOXD2, LHX9, ETV4, TAF1, TRIM28, FOXA1, SOX30, SMAD4, FOXP4, ZNF165, FOXP2, ZFHX4, ATF4, NR1I3, DMTF1, HOXB8, CSRNP1, ZNF213, HIVEP3, IRF4
GO:0043231~intracellular membrane-bounded organelle	73	0.0138586	ACOX1, AQP9, CYP2C19, HIP1R, RAB5C, GPLD1, CNOT1, LTC4S, ZNF638, CLTC, YBX1, ATP2B2, APOB, DDOST, GOLGA4, KCNG1, BRAF, GZMH, RPTOR, GAK, ARHGAP30, TRIM33, ALDH1B1, ZMIZ1, DDX31, RUVBL1, NEU2, MYBBP1A, ABCA7, TRA2A, PPT2, AASS, C2ORF88, ABCA4, ATP12A, LLGL2, IGF1R, NUP214, ZNF326, PLCH1, ABCD2, CASZ1, DYRK4, CC2D1B, DNMT3B, QSOX1, ABCA13, TNPO3, COL4A3, MSH6, POLR3H, SUN1, TP73, ATP13A5, ABCG1, DD…	GO:0032212~positive regulation of telomere maintenance via telomerase	7	0.0565661	MAPK1, TCP1, CCT3, MAP2K7, ATM, CTNNB1, TNKS2
hsa04071:Sphingolipid signaling pathway	22	0.0141634	PIK3CG, PRKCZ, SPTLC1, GNAI3, GNAI2, PPP2R5A, PIK3CD, PPP2R5C, TP53, PTEN, S1PR1, PLCB4, KRAS, S1PR4, PPP2CB, RHOA, PIK3CA, AKT3, PIK3R1, SMPD2, PIK3R2, OPRD1	GO:1903561~extracellular vesicle	9	0.0565869	SLC5A5, F5, FGB, GNB1, IFT172, GRIA4, EDIL3, ATP1A2, LFNG
GO:0033151~V(D)J recombination	5	0.014422	DCLRE1C, RAG1, LIG4, RAG2, ATM	GO:0048306~calcium-dependent protein binding	10	0.0566897	RBM22, ANXA7, S100P, MASP1, VPS37B, NSMF, NRXN1, PDCD6, CLEC4M, VLDLR
GO:0002430~complement receptor mediated signaling pathway	5	0.014422	GPR32, CR2, FPR1, GPLD1, FPR3	GO:0043010~camera-type eye development	8	0.0567371	CYP1A1, FBN1, FOXC1, HSF4, MTERF4, MAB21L2, SHH, FOXP2
GO:0018024~histone-lysine N-methyltransferase activity	10	0.0152172	MEN1, DOT1L, KMT2D, PRDM9, KMT2A, KMT2C, PRDM2, SMYD2, SETD2, PRDM16	GO:0017146~NMDA selective glutamate receptor complex	4	0.0592437	EPS8, GRIN2B, GRIN2A, SHANK1
GO:0003774~motor activity	14	0.015363	MYH1, KIF5A, MYO1E, MYH3, MYO3B, MYH2, MYH7, MYH6, MYH9, KIF1C, MYO18B, DNAI1, DYNC2H1, MYO19	GO:0032421~stereocilium bundle	3	0.0599223	TRPA1, USH2A, DOCK4
GO:0072562~blood microparticle	25	0.0159172	IGHG1, CPSF3L, C1S, IGHM, TGFB1, ACTG1, FGG, CFHR3, FGA, IGHV3-23, SERPINA3, CFH, IGKV2-30, ITIH2, HRG, IGKC, POTEF, HSPA8, FN1, CD5L, C8A, C1QB, AFM, TFRC, CP	GO:0071560~cellular response to transforming growth factor beta stimulus	9	0.061398	TGFBR1, EPB41L5, FBN1, POSTN, COL1A1, PDCD5, SOX9, PPARGC1A, TGFB1
hsa04724:Glutamatergic synapse	21	0.0159922	DLGAP1, GNAI3, GNAI2, ADCY8, GRIK3, GRIN2A, GRIA4, ITPR3, GRM1, SHANK3, ITPR2, GLS2, SLC17A8, PLA2G4A, PLCB4, GRIN2B, GRIA1, SLC1A6, DLG4, PRKACA, CACNA1A	GO:0098821~BMP receptor activity	3	0.0614121	ACVR2A, BMPR2, BMPR1A
GO:0005737~cytoplasm	562	0.0163024	TTI1, NAF1, CROCC, PPP2R5A, EHHADH, CMTR2, ITSN2, ZNF638, SART3, MXI1, TESPA1, CTNNB1, WDR72, BRPF1, PPP1R1A, WDR77, LRRC7, PIK3CG, YARS, TFPT, BRAF, PTPRH, ESPL1, LIG4, MYH9, MYH8, RPTOR, MARK1, CTNNA3, ERMAP, SSTR4, SCYL1, EIF2S1, RYR1, VGLL2, MYBBP1A, DNAH11, CPSF3L, DNAH10, GNAI3, TNRC18, GNAI2, NFKBIE, DNAH17, MYEF2, FLG2, FAM19A2, RCC1, DIDO1, ATN1, HEXIM1, UBASH3B, CASZ1, DNMT3B, ARHGEF10L…	GO:0030023~extracellular matrix constituent conferring elasticity	3	0.0614121	FBN1, EMILIN2, EMILIN1
GO:0035264~multicellular organism growth	16	0.0163557	STIL, KDM6A, SLC12A5, PCDH15, PDE4D, RMI1, WDR48, ZFP36L1, UNC79, HHEX, STK40, SP2, ANKRD11, MTOR, RARB, ERCC2	GO:0034711~inhibin binding	3	0.0614121	ACVR2A, INHBA, INHA
GO:0030183~B cell differentiation	14	0.0165738	DCLRE1C, VCAM1, HHEX, CR2, EP300, ONECUT1, PLCG2, RAG1, GON4L, RAG2, CD79A, ITGA4, IFNA16, PIK3R1	GO:0005539~glycosaminoglycan binding	5	0.0619624	LTBP4, TGFBR3, VCAN, VIT, SHH
GO:0005085~guanyl-nucleotide exchange factor activity	21	0.0166782	NGEF, OBSCN, VAV3, DOCK9, HERC2, DOCK8, RASGEF1C, DOCK5, DOCK6, FNIP1, RIC8A, SH2D3C, DOCK2, GBF1, RAPGEF6, RAPGEF4, DOCK10, SPATA13, DOCK11, NET1, BCAR3	GO:0007626~locomotory behavior	13	0.061976	SLC6A3, CELSR1, DBH, GRM1, ATP2B2, NAV2, MYO15A, GRM6, CHRNB4, CHRNB2, APBA1, DSCAM, CDH23
GO:0004875~complement receptor activity	4	0.0169651	GPR32, CR2, FPR1, FPR3	GO:0030206~chondroitin sulfate biosynthetic process	6	0.0624518	XYLT2, CHSY3, CSPG4, CHST13, VCAN, CHST15
hsa04972:Pancreatic secretion	18	0.0172279	PNLIP, PNLIPRP1, CLCA4, ADCY8, ATP1A3, ITPR3, ITPR2, ATP2B2, PLCB4, ATP2A1, RHOA, CPA2, RYR2, CELA2B, CELA2A, KCNQ1, PLA2G5, SLC9A1	hsa04066:HIF-1 signaling pathway	14	0.0625576	PIK3CG, FLT1, HK2, HK1, IGF1R, MAPK1, CUL2, EIF4E, TEK, SLC2A1, CAMK2D, PIK3CA, PIK3R3, CAMK2A
hsa05212:Pancreatic cancer	14	0.017392	PIK3CG, EGFR, BRAF, RALBP1, PIK3CD, TP53, TGFB1, KRAS, CASP9, PIK3CA, JAK1, AKT3, PIK3R1, PIK3R2	GO:0005178~integrin binding	15	0.0634504	NPNT, LTBP4, ICAM2, UTRN, FBN1, ICAM3, EDIL3, COL5A1, ANXA7, VWF, ADAMTS8, NISCH, ADAM2, FBLN5, DST
hsa05214:Glioma	14	0.017392	PIK3CG, EGFR, BRAF, PIK3CD, TP53, PTEN, IGF1R, KRAS, PLCG2, PIK3CA, MTOR, AKT3, PIK3R1, PIK3R2	GO:0007411~axon guidance	21	0.0639359	NRP2, WNT3A, KIF5C, NFASC, SMAD4, NRXN1, PTPRO, SLIT1, SHH, RPS6KA5, MAPK1, RANBP9, ROBO1, SOS1, MAPK8IP3, POU4F2, RELN, SEMA3B, SPTA1, EXT1, KIF26B
GO:0035315~hair cell differentiation	4	0.0174337	SPINK5, USH2A, CTNNB1, ERCC2	GO:0033153~T cell receptor V(D)J recombination	3	0.064211	LEF1, PRKDC, LIG4
GO:0051573~negative regulation of histone H3-K9 methylation	4	0.0174337	KDM1A, PAX5, DNMT3B, BRCA1	GO:0042541~hemoglobin biosynthetic process	3	0.064211	INHBA, ALAS2, INHA
GO:0001701~in utero embryonic development	30	0.0175846	STIL, KDM6A, HSD17B2, FUT8, B9D1, C5, SOX6, OCRL, YBX1, CTNNB1, KDM1A, APOB, COL4A3BP, ANKRD11, IFITM5, PKD1, TIE1, INPP5B, ERCC2, LMX1B, MYO1E, MYH6, LIG4, MYH9, SLC34A2, RIC8A, HHEX, MYO18B, ZMIZ1, FOXC1	GO:0031052~chromosome breakage	3	0.064211	BRCA2, HMGA2, PALB2
GO:0043085~positive regulation of catalytic activity	16	0.0182111	CXCL1, PIK3CG, CFLAR, SH3PXD2A, PHACTR4, NCF4, PPP1R12B, NR4A2, LTC4S, AZIN2, PLAA, NCSTN, ARF1, UBA2, PITRM1, IGFBP3	GO:0086046~membrane depolarization during SA node cell action potential	3	0.064211	CACNA1G, HCN4, CACNA1D
GO:0007018~microtubule-based movement	16	0.0182111	DNAH10, KIFC1, KIF25, KIF5A, DNAH17, DNAH3, DNAH5, KIF1C, KIF13A, KIF2B, KIF2C, AP2A2, DYNC2H1, KIF21A, AP2M1, NGF	GO:0033600~negative regulation of mammary gland epithelial cell proliferation	3	0.064211	ROBO1, BRCA2, ETV4
GO:0030198~extracellular matrix organization	31	0.0188841	ITGAL, ITGAE, ELN, DCN, SPINK5, ITGAM, VCAM1, FGG, COL7A1, FGA, COL6A3, AGRN, LAMB1, COL11A1, ERCC2, FN1, COL4A4, COL4A3, HAPLN1, COL13A1, NOX1, HSPG2, ITGA2, ITGA4, COL16A1, COL5A1, LAMA1, FBLN1, ITGA7, COL1A2, NCAN	GO:1900180~regulation of protein localization to nucleus	3	0.064211	RASSF5, LMNA, SHH
hsa04012:ErbB signaling pathway	17	0.0193957	PIK3CG, EGFR, ERBB4, BRAF, MAP2K4, PIK3CD, RPS6KB2, PAK6, KRAS, JUN, PLCG2, PIK3CA, MTOR, NRG2, AKT3, PIK3R1, PIK3R2	GO:0036336~dendritic cell migration	3	0.064211	EPS8, NLRP12, DOCK8
GO:0005938~cell cortex	21	0.0195163	CNKSR1, FAM110C, FBLIM1, SPINK5, CTNNB1, ITPR2, CTTNBP2, MKLN1, FGG, HMCN1, KDF1, FGA, FNBP1L, SCIN, RHOA, RYR1, GPSM2, GRK4, DST, POTEF, MELK	GO:0000904~cell morphogenesis involved in differentiation	3	0.064211	LAMC3, RELN, CTNNB1
GO:0043005~neuron projection	35	0.0195967	CADM1, GRIP1, PDLIM5, SPINK2, BDKRB1, ARPC5, PTEN, GRIN2B, ANK2, ANK3, SV2B, SLC30A3, BRAF, PTPRF, CPNE5, SLC6A11, KIF5A, GRIN2A, ATP13A2, SHANK3, NPY5R, SSTR4, TENM4, UFL1, CDH13, NCOA1, HDAC1, P2RX1, ARF1, TENM1, EPHA8, MAP2, MPL, RNF40, OPRD1	GO:0070914~UV-damage excision repair	4	0.0650646	XPC, ACTR5, DDB1, INO80
hsa05211:Renal cell carcinoma	14	0.0196297	PIK3CG, PAK6, KRAS, EP300, BRAF, JUN, PIK3CD, MET, PIK3CA, HGF, TGFB1, PIK3R1, AKT3, PIK3R2	GO:0060021~palate development	12	0.0666079	INHBA, TGFBR1, WNT3A, CSRNP1, SOS1, IFT172, TIPARP, SMAD4, TGFBR3, LEF1, SHH, BMPR1A
GO:0043197~dendritic spine	18	0.0199669	SLC8A3, NOS1, LZTS1, SYNDIG1, HIP1R, MAP1B, ASIC2, CTNND1, ASAP1, DGKI, CANX, PTEN, SHANK3, CTTNBP2, NR1D1, GRIA1, DLG4, SYNPO	GO:0030864~cortical actin cytoskeleton	8	0.0666437	DLC1, PPP1R9A, UTRN, SLC2A1, AKAP13, CDH1, CAPN2, LLGL1
GO:0043560~insulin receptor substrate binding	5	0.0201458	IGF1R, PRKCZ, PIK3CA, PIK3R1, INSRR	GO:0030705~cytoskeleton-dependent intracellular transport	5	0.0667036	KIF1C, KIF13A, KIF5C, KIF16B, KIF26B
GO:0032956~regulation of actin cytoskeleton organization	11	0.0201795	TRIOBP, CCDC88A, LRP1, HIP1R, VANGL2, ARHGEF19, RHOA, GRHL3, HRG, MTOR, SIGLEC15	GO:0036342~post-anal tail morphogenesis	5	0.0667036	WNT3A, MED12, PALB2, DCHS1, EPHA2
GO:0003713~transcription coactivator activity	37	0.0204888	NACA, MTDH, GRIP1, NFYC, FHL5, PRDM16, RFXAP, ATF2, CTNNB1, TAF5L, PER2, BCL9L, KDM5A, TRIP11, TFDP1, TAF1, GMEB2, ASXL1, SIX3, MED12, ARID1A, CDK7, MED13, ARID1B, BRCA1, NRIP1, JMY, NCOA1, EP300, NCOA3, MTF1, JUN, SMARCC1, RIPK3, VGLL2, SRCAP, SMARCA4	GO:0035904~aorta development	5	0.0667036	ADAMTS6, LTBP1, PKD2, TAB1, DNM2
GO:0005801~cis-Golgi network	10	0.0207264	GBF1, SCYL1, YIPF6, GOSR1, TRIP11, AZIN2, PIK3R1, GOLGB1, GOLGA2, LRPAP1	GO:0006261~DNA-dependent DNA replication	5	0.0667036	POLD3, RPA1, BAZ1A, RFC1, POLG2
GO:0003281~ventricular septum development	8	0.0212539	SALL4, XIRP2, SALL1, PTK7, LUZP1, TRIP11, GJA5, DNM2	GO:0035066~positive regulation of histone acetylation	5	0.0667036	RPS6KA5, NOS1, RUVBL2, PPARGC1A, TGFB1
hsa04810:Regulation of actin cytoskeleton	33	0.021812	ITGAL, PPP1R12B, ITGAE, WASF2, PIP5K1C, BDKRB1, ARPC5, ITGAM, INSRR, VCL, PAK6, ACTG1, KRAS, PIKFYVE, RHOA, PIK3CA, PIK3R1, APC, PIK3R2, FN1, PIK3CG, EGFR, VAV3, BRAF, MYLK4, PIK3CD, ITGA2, NCKAP1L, ITGA4, SCIN, ITGA7, PIP4K2C, SLC9A1	GO:0043547~positive regulation of GTPase activity	61	0.068648	DLC1, AGAP6, PTGIR, GBF1, GRIN2B, TIAM2, RAPGEF4, FRS2, RAPGEF1, ARHGAP9, ARHGEF1, PLXNB1, ARHGEF19, GRIN2A, ARHGEF17, PLCE1, ARHGAP33, ARFGEF3, TBCD, LRRK2, DENND3, SRGAP1, RIN3, RALGPS1, AGFG1, AKAP13, MYO9B, AKAP9, DENND2A, ARFGEF2, FAM13A, LLGL1, CCL7, ARHGAP39, STARD13, RASAL2, GMIP, SOS1, TEK, CAMK2D, FGD5, KNDC1, CAMK2A, LAMTOR5, OBSCN, IL2RB, DNM1L, KLB, NCKAP1L, DOCK8, RACGAP1, VAV1, EIF…
GO:0000278~mitotic cell cycle	10	0.022161	MEN1, PAK6, CUL3, CDH13, CENPC, CENPF, CENPT, CDC5L, CDC25B, TFDP1	hsa04974:Protein digestion and absorption	13	0.0686998	COL4A4, COL9A2, SLC8A1, COL6A6, COL7A1, COL27A1, MME, COL1A1, ATP1A2, SLC3A1, COL5A3, KCNQ1, COL5A1
GO:0031430~M band	7	0.0223426	OBSCN, ANK1, ANK2, PPP2R5A, MYOM3, TTN, ENO1	GO:0030097~hemopoiesis	10	0.070221	TTC7A, CUL4A, FLT3, WNT3A, TIPARP, BRCA2, IFI16, GFI1, SPTA1, CIAPIN1
GO:0004674~protein serine/threonine kinase activity	52	0.0229602	PRPF4B, STK36, RPS6KB2, TTN, PAK6, MAP3K6, PIK3CA, PRKACA, CDK15, AKT3, SIK3, CDC7, PIK3CG, SRPK3, CCNK, BRAF, CSNK1G1, MYO3B, MYLK4, PKN2, CDK7, MARK1, MARK2, GAK, PDIK1L, PRKD2, MAST2, RIPK3, NEK8, TNNI3K, LRRK1, MELK, PRKCZ, FPGT-TNNI3K, ULK4, STK40, TTBK1, DCLK3, LMTK2, DYRK4, PRKAA2, AATK, OBSCN, TAF1, ALPK3, MAP2K3, NLK, ATR, ATM, CSNK1E, MTOR, BMPR1B	GO:0097228~sperm principal piece	5	0.07051	CATSPERG, IFT172, HK1, DNAH8, KIF2A
hsa05150:Staphylococcus aureus infection	12	0.0242063	ITGAL, C1QB, FGG, MASP2, C5, CFH, FPR1, FPR3, C1S, HLA-DMA, HLA-DQA2, ITGAM	hsa04270:Vascular smooth muscle contraction	16	0.0708651	RAMP3, GNA13, ARHGEF1, BRAF, ADCY8, ADCY6, CACNA1S, ITPR1, KCNU1, MAPK1, PTGIR, PPP1CA, ADRA1B, GUCY1A2, ADRA1A, CACNA1D
GO:0003684~damaged DNA binding	13	0.0248636	MSH6, NBN, MSH3, DDB1, MSH4, TP53, BRCA1, TP73, DCLRE1C, EP300, RAD18, H2AFX, POLQ	GO:0030534~adult behavior	6	0.0719776	ADAM2, GRM7, NRXN1, SHANK1, PCDH17, SHANK2
GO:0032452~histone demethylase activity	7	0.0251887	KDM1A, KDM6A, KDM4B, KDM3B, KDM5A, KDM6B, KDM5D	GO:0032420~stereocilium	6	0.072286	EPS8, MYO15A, ADGRV1, SLC4A7, DOCK4, CDH23
GO:0044615~nuclear pore nuclear basket	5	0.0254345	NUP214, NPAP1, NUP98, POM121C, TPR	hsa05202:Transcriptional misregulation in cancer	21	0.074299	KDM6A, IL2RB, FLT1, KMT2A, FLT3, MMP9, ARNT2, TP53, RUNX1T1, AFF1, HMGA2, ITGAM, ATM, DOT1L, IGF1R, NUPR1, HOXA10, BMP2K, JMJD1C, NCOR1, ETV4
GO:0070578~RISC-loading complex	4	0.0255368	ZFP36, DICER1, AGO1, AGO3	GO:0007601~visual perception	25	0.0745285	OPA3, RP1, KERA, MYO3A, BBS9, RP1L1, RCVRN, ABCA4, BBS10, CNGA1, GJC1, SAG, TULP2, HMCN1, BEST1, LAMC3, GRM8, ADGRV1, SLC24A1, IMPG2, CHRNB2, COL1A1, HSF4, USH2A, CDH23
GO:0046872~metal ion binding	239	0.0258094	ADCY8, ATP2B2, ZNF777, BRPF1, DDX11, ZNF100, CLCA4, ZNF646, ZNF502, BSN, ZNF649, LIG4, ESCO2, TANK, PRDM8, PRDM9, MTF1, NEK8, PRDM2, ZIM3, ZNF382, GNAI3, GNAI2, ZNF77, ZNF76, ASAP1, ATP12A, TRMT44, KRAS, CASZ1, LFNG, DNMT3B, ASXL2, ZBTB48, ADPRM, ASXL1, ZNF521, SMYD2, ZSCAN4, ATP13A2, ATP13A5, TNNI1, ATP13A4, GH1, ZNF215, PLA2G4A, IRF2BPL, CD209, UBA2, ATP2A1, HGS, ARSB, ZNF536, ARSF, ZNF676, ZBT…	GO:0031402~sodium ion binding	4	0.0766375	SLC24A3, SLC24A1, SLC24A5, ATP1A2
hsa04210:Apoptosis	13	0.0277308	PIK3CG, CFLAR, CASP9, DFFA, PIK3CD, TP53, PIK3CA, IL3RA, PIK3R1, AKT3, ATM, PIK3R2, NGF	GO:0007204~positive regulation of cytosolic calcium ion concentration	18	0.0776458	GNA13, CAV3, TRPM4, PIK3CG, ESR1, LPAR3, BDKRB1, PTGFR, RIC3, CCR9, PLCE1, PTGIR, GNB1, NMUR2, ADRA1B, PKD1, ADRA1A, CACNA1A
GO:0032839~dendrite cytoplasm	6	0.0279227	KLHL17, HIP1R, GRIK3, MAP2K4, DLG4, CANX	GO:0048538~thymus development	8	0.07833	MAPK1, BRAF, TGFBR1, RAG1, PRKDC, PAX1, SHH, CTNNB1
GO:0051646~mitochondrion localization	4	0.0281831	MFN2, MUL1, BRAT1, MARK2	GO:0008045~motor neuron axon guidance	5	0.0788636	ALCAM, KIF5C, LHX9, SLIT1, ETV4
GO:0043931~ossification involved in bone maturation	4	0.0281831	FAT4, RHOA, RYR1, THBS3	GO:0005096~GTPase activator activity	32	0.0797899	DLC1, AGFG1, MYO9B, FAM13A, LLGL1, ARHGAP39, STARD13, RASAL2, AGAP6, GMIP, TIAM2, SOS1, ARHGAP9, DNM1L, ARHGEF1, PLXNB1, ARHGEF19, NCKAP1L, RACGAP1, USP6NL, DOCK4, PREB, RGS22, RALGAPA1, ARHGAP33, SGSM3, TBCD, LRRK2, ARAP1, SRGAP1, ARHGAP10, RIN3
GO:1903077~negative regulation of protein localization to plasma membrane	4	0.0281831	CLTC, TGFB1, GBP1, AP2M1	GO:0000784~nuclear chromosome, telomeric region	17	0.0809951	SMCHD1, MSH2, DDB1, SUN2, PRKDC, BRCA2, LIG4, TERF2IP, ATM, POLR2B, TNKS2, MCM6, RPA1, KDM1A, PPP1CA, THOC6, TERF2
GO:0007611~learning or memory	9	0.0281955	EGFR, GRIN2B, DRD3, ADCY8, GRIN2A, AFF2, LHX8, PTEN, GLP1R	GO:0043206~extracellular fibril organization	4	0.0812822	LTBP2, ADAMTS3, MFAP4, COL5A1
GO:0042136~neurotransmitter biosynthetic process	5	0.0287369	GAD2, NOS1, GAD1, SLC22A2, CHAT	GO:0055119~relaxation of cardiac muscle	4	0.0812822	SLC8A1, PDE5A, CAMK2D, ATP1A2
GO:0031000~response to caffeine	5	0.0287369	HDAC1, RYR1, RYR2, CAD, DNMT3B	GO:2000279~negative regulation of DNA biosynthetic process	4	0.0812822	DUSP1, BMPR2, DNAJC2, KCNK2
GO:0071872~cellular response to epinephrine stimulus	5	0.0287369	RYR2, PRKACA, PDE4D, KCNQ1, SLC9A1	GO:0060306~regulation of membrane repolarization	4	0.0812822	AKAP6, KCNE2, AKAP9, KCNQ1
GO:0044212~transcription regulatory region DNA binding	32	0.0288547	KMT2D, ERBB4, KMT2A, NFYC, SOX6, CTNNB1, MEN1, KDM1A, NR1D1, H2AFY, CDK5RAP2, ELMSAN1, TAF1, ZNF567, FOXA1, TP53, ZNF649, TTF1, CDC5L, TP73, BRCA1, HHEX, SALL4, HDAC1, JUN, SFPQ, SALL1, HIVEP3, FOXC1, ZFHX3, TCF12, ZNF382	GO:0031581~hemidesmosome assembly	4	0.0812822	LAMA3, LAMC1, DST, PLEC
hsa04666:Fc gamma R-mediated phagocytosis	16	0.0295071	PIK3CG, PTPRC, VAV3, WASF2, PIK3CD, PIP5K1C, RPS6KB2, ASAP1, ARPC5, DOCK2, PLCG2, SCIN, PIK3CA, PIK3R1, AKT3, PIK3R2	GO:0033077~T cell differentiation in thymus	6	0.0822503	RAG1, PRKDC, LIG4, FZD7, SHH, CTNNB1
GO:0070062~extracellular exosome	310	0.0295612	CADM1, S100A8, CROCC, MASP2, LTBP4, RUSC2, UTRN, S100A9, PTPN23, NR2C2AP, PPCS, RAB1B, LUZP1, ITSN2, SZT2, KIAA0319L, IGHM, CTNNB1, CUL3, ACTG1, ATP2B2, NPAP1, APOB, HMCN1, H2AFV, PLOD1, DDX11, VPS13D, DYNC2H1, CFH, H2AFY, H2AFX, GBP6, SLC12A9, PTPRF, CLCA4, ABCB11, CRTAC1, MYH3, MYLK4, MYH9, PCLO, PGM2, C1QB, HUWE1, EIF2S1, MGAM, RYR1, RYR2, RAB15, GNAI3, GNAI2, PPT2, FLG2, OCRL, CAPZB, HADHB, P…	hsa05220:Chronic myeloid leukemia	11	0.0829314	PIK3CG, MAPK1, CBLB, BRAF, TGFBR1, SOS1, TP53, SMAD4, PIK3CA, PIK3R3, TGFB1
GO:0098910~regulation of atrial cardiac muscle cell action potential	3	0.0299403	ANK2, RYR2, GJA5	GO:0007416~synapse assembly	10	0.0831173	DNM3, PCDHB6, PCDHB16, WNT3A, SDK1, CDH1, NRXN1, SHANK2, CACNA1A, DSCAM
GO:2001202~negative regulation of transforming growth factor-beta secretion	3	0.0299403	LILRB1, FBLN1, FN1	GO:0032092~positive regulation of protein binding	10	0.0831173	GCG, TAF1, DACT1, KRIT1, WNT3A, EPB41L5, PKD1, SPTA1, LRRK2, LFNG
GO:0002331~pre-B cell allelic exclusion	3	0.0299403	RAG1, RAG2, ATM	hsa04810:Regulation of actin cytoskeleton	25	0.0834457	GNA13, ITGAE, SSH3, SSH2, WASF2, DIAPH3, BDKRB1, ITGAM, INSRR, PFN1, ITGAX, SOS1, PIK3CA, PIK3R3, ACTB, PIK3CG, ARHGEF1, BRAF, NCKAP1L, MYL12B, VAV1, ITGA9, MAPK1, PPP1CA, CYFIP1
GO:0035861~site of double-strand break	8	0.0301697	RNF8, SMARCAD1, NBN, SMC5, RAD18, H2AFX, ESCO2, ATF2	hsa04722:Neurotrophin signaling pathway	16	0.0841838	PIK3CG, IRAK2, BRAF, TP53, MAGED1, RPS6KA5, MAPK1, ATF4, SOS1, CAMK2D, PIK3CA, PIK3R3, MAP2K7, CAMK2A, RAPGEF1, FRS2
GO:0051865~protein autoubiquitination	11	0.0301888	RNF8, LTN1, RNF220, UHRF2, UBE4B, RAG1, RAD18, TRIM71, ASB4, BRCA1, CNOT4	hsa05217:Basal cell carcinoma	9	0.0848932	FZD9, WNT3A, TP53, LEF1, PTCH2, FZD2, FZD7, SHH, CTNNB1
GO:0016363~nuclear matrix	17	0.0303258	SMARCAD1, PRKCZ, SATB2, CEBPB, ENC1, TP53, RUNX1T1, CENPF, CAD, MBD1, ATXN1, MEN1, ATN1, ZNF326, TENM1, SFPQ, RUVBL1	GO:0061025~membrane fusion	8	0.0864562	ANXA7, DNM3, DNM1L, OTOF, NSFL1C, DNM1P34, DCSTAMP, DNM2
GO:0000077~DNA damage checkpoint	8	0.0304788	DOT1L, NBN, TP53BP1, FBXO6, BRIP1, H2AFX, ATR, ATM	GO:0005788~endoplasmic reticulum lumen	23	0.0875087	COL4A4, ARSD, FLT3, WNT3A, COL5A3, PRKCSH, CERCAM, COLGALT1, COL5A1, SHH, GAS6, PROC, GCG, APOB, COL9A2, COL19A1, F5, GBF1, COL7A1, P4HA1, COL27A1, COL1A1, MBTPS1
GO:0045773~positive regulation of axon extension	8	0.0304788	MACF1, ZFYVE27, TRPC5, MAP1B, L1CAM, GOLGA4, CDH4, FN1	GO:0098793~presynapse	10	0.0877476	CADPS, SYNDIG1, SYT10, SLC6A3, WNT3A, OTOF, SYNJ1, SNAP47, NRXN1, CACNA1A
GO:0008285~negative regulation of cell proliferation	54	0.0305805	IGFBP6, PPP2R5C, GPLD1, MXI1, PTEN, TGFB1, CTNNB1, FNTB, MEN1, DLG5, RARB, ADGRB1, IL1A, DHCR24, PHOX2B, RBBP4, TP53, PTPRU, IL24, SLIT3, SSTR4, JUN, BTG3, SCIN, RNF139, CXCL1, HIST1H2AC, PODN, ERBB4, NDN, KMT2A, HIST1H2AE, CDC73, ZBTB16, PBRM1, HRG, GPNMB, CHD5, QSOX1, APC, COL4A3, BRIP1, SMYD2, AMBRA1, GAS8, TP73, CDH13, HDAC1, TENM1, IRF6, TSC2, HGS, IGFBP3, BMP5	GO:0001503~ossification	12	0.0891211	FZD9, IGSF10, SP3, MMP9, IGF2, FOXC1, SPARC, EXT1, SOX9, TMEM119, EIF2AK3, CDH11
GO:0005200~structural constituent of cytoskeleton	19	0.0307641	EPB41, EHHADH, ARPC5, BICD1, VILL, ACTG1, ACTR3, SORBS3, FRMD5, ANK1, ANK2, ANK3, PPL, TUBA4B, AGRN, SPTA1, TUBG1, TUBB3, SPTB	GO:0050896~response to stimulus	10	0.0900645	OPA3, HMCN1, KERA, MYO3A, BBS9, SLC24A5, CNGA4, BBS10, USH2A, CDH23
GO:0005913~cell-cell adherens junction	44	0.0310031	SHROOM2, CADM1, SNX5, CHMP4B, PDLIM5, WASF2, EIF5, CTNND1, ASAP1, CAPZB, PRDX1, VCL, CTNNB1, EFHD2, PAK6, ATXN2L, MACF1, SH3GLB1, ATIC, PPL, FAT2, DLG5, HSPA8, AHNAK, PLEC, ENO1, GOLGA2, APC, EGFR, DOCK9, PKN2, PI4KA, LYPLA2, GLOD4, MYH9, EPHA2, MARK2, DDX6, SCYL1, FNBP1L, EIF4H, CCT8, RUVBL1, YKT6	hsa04390:Hippo signaling pathway	19	0.0901067	ACTB, FZD9, PPP2R1A, TP53BP2, TGFBR1, WNT3A, BMPR2, SMAD4, LEF1, TEAD2, CDH1, FZD2, TGFB1, FZD7, LLGL1, CTNNB1, PPP1CA, CCND3, BMPR1A
GO:0002250~adaptive immune response	24	0.0311073	PIK3CG, TNFRSF21, ITK, CD8B, VTCN1, PIK3CD, RAG1, CD1C, CD1B, IGHM, LILRB1, DCLRE1C, PRKD2, IGKV2-28, LILRA1, FGA, ZNF683, LILRA4, LILRB3, CD209, TAP1, CD79A, RNF19B, IFNA16	GO:0046881~positive regulation of follicle-stimulating hormone secretion	3	0.0908262	INHBA, SMAD4, INHA
hsa05161:Hepatitis B	24	0.0313104	PIK3CG, MMP9, DDB1, MAP2K4, PIK3CD, TP53, HSPG2, PTEN, TGFB1, ATF2, STAT4, EP300, KRAS, CASP9, JUN, JAK1, PIK3CA, IFNA16, CCNA1, NFATC2, AKT3, PIK3R1, PIK3R2, NFATC1	GO:0000480~endonucleolytic cleavage in 5'-ETS of tricistronic rRNA transcript (SSU-rRNA, 5.8S rRNA, LSU-rRNA)	3	0.0908262	UTP23, RCL1, UTP20
hsa05222:Small cell lung cancer	16	0.0324603	COL4A4, PIK3CG, COL4A3, PIK3CD, TP53, ITGA2, PTEN, LAMA1, CASP9, PIK3CA, RARB, LAMB1, AKT3, PIK3R1, FN1, PIK3R2	GO:0003179~heart valve morphogenesis	3	0.0908262	FGFRL1, SOX9, TGFB1
GO:0036064~ciliary basal body	17	0.0330086	RSG1, BBS7, KNCN, B9D1, PTPN23, ALMS1, CENPF, GAS8, CENPJ, RTTN, WRAP73, IFT172, TBC1D7, ODF2, TUBG1, USH2A, IFT140	GO:0009988~cell-cell recognition	3	0.0908262	PCDHA7, PCDHB6, CLEC4M
GO:0005903~brush border	12	0.0335666	ACTR3, SLC15A1, MYO1E, SI, SCIN, MYH9, ITPR3, CAPZB, PLEC, SLC34A2, ESPN, VCL	GO:0044782~cilium organization	3	0.0908262	MNS1, TTC17, RTTN
GO:0042405~nuclear inclusion body	5	0.0338998	ATXN1, NBN, NUP98, RAD18, TPR	GO:1903799~negative regulation of production of miRNAs involved in gene silencing by miRNA	3	0.0908262	ESR1, NCOR1, TGFB1
hsa05218:Melanoma	14	0.0341701	EGFR, PIK3CG, IGF1R, KRAS, BRAF, PIK3CD, MET, TP53, PIK3CA, HGF, PTEN, PIK3R1, AKT3, PIK3R2	GO:0060762~regulation of branching involved in mammary gland duct morphogenesis	3	0.0908262	CAV3, TGFB1, ETV4
GO:0030424~axon	32	0.0346044	DCC, TNFRSF21, RAP1GAP, KCNA2, GRIK3, DICER1, KCNA3, LPAR3, AZIN2, CANX, TGFB1, SETX, GAD2, LRRTM1, TUBB3, CPT1C, HCN1, NCDN, HTT, SCN2A, MAP2K4, SACS, ATP1A3, MUL1, BSN, HEPACAM, ZFYVE27, LRP8, SPTA1, DST, IGSF9, GAP43	GO:0051754~meiotic sister chromatid cohesion, centromeric	3	0.0908262	PPP2R1A, REC8, RAD21
GO:0000242~pericentriolar material	6	0.0348665	CEP85, NIN, CEP192, BBS9, TUBG1, CDK5RAP2	GO:0007256~activation of JNKK activity	3	0.0908262	TNIK, MAP3K9, MAP3K11
GO:0043034~costamere	6	0.0348665	ANK2, ANK3, FLNC, AHNAK, PLEC, VCL	GO:0071799~cellular response to prostaglandin D stimulus	3	0.0908262	PTGIR, TNC, PTGFR
GO:0000228~nuclear chromosome	11	0.0348692	MSH6, RAD21, MSH3, JUN, MSH4, HIST1H4E, H2AFY, PBRM1, SPO11, SMC2, SETX	GO:0032964~collagen biosynthetic process	3	0.0908262	COL1A1, ADAMTS3, COL5A1
GO:0048471~perinuclear region of cytoplasm	77	0.0354386	SLC8A3, TSPAN1, HIP1R, MRVI1, UBQLN4, SPINK5, CTNNB1, COL4A3BP, ANP32A, CDK5RAP2, SEC24C, EGFR, HMGCLL1, KIF5A, PKN2, CDC5L, CDK7, BICD1, GAK, MYRIP, ANKRD13C, SCYL2, RYR3, RAB15, GBP4, SRCAP, PLA2G5, AKAP4, SLC2A12, PRKCZ, MTDH, NFKBIE, CSF1, C14ORF166, AZIN2, SERINC3, GAD2, ECE1, ATN1, KIRREL, PIKFYVE, LMTK2, PER2, PCSK9, HECTD3, PTN, LAMB1, USP33, EHD2, THBS3, SLC30A7, AATK, UPF2, NOS1, MT1M, …	GO:0048341~paraxial mesoderm formation	3	0.0908262	HNF1A, LEF1, FOXC1
GO:0030017~sarcomere	9	0.0361073	SYNE1, MYO18B, ARF1, MYH3, MYH2, MYH7, MYH6, MYH8, CAPZB	GO:0010649~regulation of cell communication by electrical coupling	3	0.0908262	SLC8A1, CAMK2D, ASPH
GO:0031252~cell leading edge	9	0.0361073	PRKCZ, KDF1, GBF1, ARF1, TUBG1, DOCK8, MYH9, DST, JMY	GO:0003223~ventricular compact myocardium morphogenesis	3	0.0908262	TGFBR1, TGFBR3, BMPR1A
GO:0005654~nucleoplasm	306	0.0366612	ITGB3BP, FAM110C, PPP2R5C, UTRN, PTPN23, NR2C2AP, ZNF638, SART3, CTNNB1, CUL3, WDR75, NPAP1, BRPF1, DDX11, COL4A3BP, WDR77, H2AFX, RARB, CCNA1, TFPT, UBR4, MED12, DEPDC1, LIG4, MED13, RPTOR, NCAPD3, ESCO2, DCLRE1C, RFC5, PCF11, RFC3, MYO18B, UHRF2, PRDM9, HUWE1, MTF1, NAV2, JUN, TGIF2, MYBBP1A, CPSF3L, ERBB4, GNAI2, RBP1, TNRC18, SRSF12, UBA7, MYEF2, RCC1, ATN1, HEXIM1, CASZ1, PBRM1, POLQ, DNMT3B…	hsa05230:Central carbon metabolism in cancer	10	0.0911436	PIK3CG, MAPK1, FLT3, SLC2A1, TP53, HK2, PIK3CA, HK1, PIK3R3, SLC7A5
GO:0031390~Ctf18 RFC-like complex	4	0.0378716	RFC5, RFC3, DDX11, CHTF18	GO:0051568~histone H3-K4 methylation	5	0.0920397	KMT2D, KDM6A, KMT2A, KMT2C, ASH1L
GO:0045197~establishment or maintenance of epithelial cell apical/basal polarity	5	0.0381857	VANGL2, DLG4, DLG5, DLG2, MARK2	GO:0003281~ventricular septum development	6	0.0932544	LTBP1, XIRP2, GATA4, STRA6, FRS2, DNM2
hsa02010:ABC transporters	10	0.0385492	ABCA8, ABCA7, ABCA9, ABCB11, TAP1, ABCD2, ABCB1, ABCA4, ABCA13, ABCG1	GO:0007528~neuromuscular junction development	6	0.0932544	TNC, UTRN, PDZRN3, CACNB4, AFG3L2, LRRK2
GO:0071158~positive regulation of cell cycle arrest	7	0.0386592	UHRF2, TP53, PRKACA, MYBBP1A, BRCA1, TGFB1, TP73	GO:0031410~cytoplasmic vesicle	27	0.093767	AGFG1, TFR2, ARFGEF2, ACSBG1, SLC4A7, TRAF7, SPERT, SLC30A8, MYOF, MLC1, TECPR1, ARRDC2, ATM, BICD1, USP6NL, GRM4, ATP2C2, PSMC5, TRAPPC8, SCN8A, RAB13, LRRK2, PDCD6, GGNBP2, DST, ARAP1, RIN3
GO:0055010~ventricular cardiac muscle tissue morphogenesis	7	0.0386592	TGFBR3, FOXC1, MYH7, MYH6, COL11A1, TGFB1, TNNI1	GO:0005938~cell cortex	16	0.0944653	FRYL, AKAP12, RAI14, AKAP13, MYO9B, FRY, CTNNB1, FMN2, PFN1, HMCN1, KDF1, EPS8, FGB, GRM7, RYR1, DST
GO:0051899~membrane depolarization	7	0.0386592	BEST2, PRKCZ, KMT2A, JUN, CACNA1E, CHRNA6, CACNA1A	GO:0001755~neural crest cell migration	8	0.0950424	OVOL2, SEMA4G, PHACTR4, SEMA3G, SEMA4B, LEF1, SEMA3B, SHH
GO:0001816~cytokine production	7	0.0386592	PIK3CG, ITK, ZCCHC11, S100A8, PIK3CD, S100A9, NFATC2	hsa05216:Thyroid cancer	6	0.0953504	MAPK1, BRAF, TP53, LEF1, CDH1, CTNNB1
hsa04914:Progesterone-mediated oocyte maturation	16	0.0390046	PIK3CG, GNAI3, GNAI2, BRAF, ADCY8, PIK3CD, CDC25B, SPDYC, IGF1R, KRAS, PIK3CA, PRKACA, CCNA1, AKT3, PIK3R1, PIK3R2	GO:0035023~regulation of Rho protein signal transduction	12	0.0953939	PLEKHG4, DLC1, OBSCN, ARHGEF1, TIAM2, SOS1, ARHGEF19, ARHGEF17, AKAP13, MYO9B, FGD5, VAV1
GO:0005794~Golgi apparatus	103	0.0393034	IMPAD1, RUSC1, KIAA1324, RAB1B, GLT6D1, CUL3, APOB, GBF1, ANK3, COL4A3BP, WDR77, DYNC2H1, AKR7A2, LEPROT, CEP85, MYH2, BICD2, ESCO2, BICD1, COPG1, SCYL1, SCYL2, DDX31, BTN3A3, ABCA7, GAL3ST4, GNAI3, NFKBIE, MACF1, GORASP1, MANEA, LMTK2, SLC30A7, HTT, PMEL, ATR, GAS8, ABCG1, RAB33B, HDAC3, SYNE1, PLA2G4A, TSC2, GOSR1, GLYR1, RSC1A1, ARSB, LDLR, ELF4, SORL1, IGFBP6, MAN1B1, ST6GALNAC5, SLC1A6, CDK5…	GO:0014069~postsynaptic density	22	0.0962267	DNM3, ARC, SYNDIG1, CRYAB, CLSTN1, BMPR2, GRIN2A, SHANK1, GRM1, SHANK2, ITPR1, EPB41L3, PPP1R9A, GRM3, EPS8, GRIA1, SOS1, EEF2K, NSMF, CAMK2A, LRP4, DNM2
GO:0005790~smooth endoplasmic reticulum	7	0.0394319	HYOU1, PLCB4, RYR3, ERP29, RYR1, RYR2, CANX	GO:0060170~ciliary membrane	8	0.0976416	BBS9, PKD2, PKD1, TAS2R43, CNGA4, SHANK2, PKD2L1, ARL13B
GO:0051276~chromosome organization	6	0.0400466	RLF, ITPA, SFPQ, CENPT, LIG4, RAD54L	hsa05214:Glioma	10	0.098261	PIK3CG, MAPK1, IGF1R, BRAF, SOS1, TP53, CAMK2D, PIK3CA, PIK3R3, CAMK2A
GO:0004842~ubiquitin-protein transferase activity	45	0.040295	HECW1, HECW2, UBA7, PAX6, RAG1, UBE3C, TRIM71, KLHDC7A, ZNRF3, TTC3, CNOT4, CUL3, ZYG11B, SHARPIN, TRIM9, KLHL28, FBXO6, RBCK1, HECTD3, HECTD4, FBXO4, FBXO21, RNF144A, RNF220, UBR4, MUL1, PDZRN4, BIRC6, HERC2, HERC1, UBE2C, TRIM62, BRCA1, RNF8, RFWD2, UHRF2, KLHL17, HUWE1, TRIM33, MIB2, RNF139, RNF19B, FBXL6, ASB4, RNF40	GO:0051117~ATPase binding	11	0.0983996	PGR, AR, SYVN1, PTPN3, NSFL1C, SLC26A9, PKD2, ESR1, BRSK2, ABCA1, ADCY10
GO:0005829~cytosol	360	0.0411014	ITGB3BP, S100A8, EHHADH, PDLIM5, S100A9, RUSC2, PPP2R5C, PPCS, CTNNB1, GLDC, CUL3, ACTG1, APOB, GBF1, COL4A3BP, WDR77, PIK3C3, BTBD3, RAPGEF6, DYNC2H1, PIK3CA, RPL10, RAPGEF4, CCNA1, PIK3CG, DEPDC7, YARS, BRAF, KIF5A, NCF4, MYH3, PIK3CD, MYH2, ESPL1, PKHD1L1, MYH6, MYH9, MYH8, RPTOR, TANK, SAG, PGM2, HUWE1, EIF2S1, JUN, CC2D2A, ADD2, PFKFB4, ERBB4, GNAI2, RBP1, NFKBIE, PFKFB1, UBA7, ASAP1, OCRL, …	GO:0007398~ectoderm development	4	0.0990396	EPB41L5, SHH, BMPR1A, CTNNB1
GO:0016746~transferase activity, transferring acyl groups	9	0.0414224	CPT1C, MCM3AP, BAAT, CPT2, EP300, KMT2C, AGPAT3, LPCAT4, CHAT	GO:0006518~peptide metabolic process	4	0.0990396	CPM, CPXM1, MME, CPN1
GO:0016874~ligase activity	38	0.0414371	LTN1, ZNF451, RAG1, TRIM71, TTLL2, TTC3, ZNRF3, CNOT4, TRIM9, RBCK1, HECTD3, HECTD4, RNF144A, RNF220, DTX2, UBE4B, UBR4, MUL1, BIRC6, HERC2, LIG4, HERC1, MID1, TRIM62, BRCA1, NAPRT, RNF8, UFL1, RFWD2, UHRF2, TRIM33, HUWE1, MIB2, RNF139, MEX3C, RAD18, RNF19B, RNF40	GO:0035036~sperm-egg recognition	4	0.0990396	KCNU1, CATSPERG, IZUMO1R, SPAM1
GO:0071313~cellular response to caffeine	4	0.0416759	GSTM2, RYR3, RYR1, RYR2	GO:0086012~membrane depolarization during cardiac muscle cell action potential	4	0.0990396	SLC8A1, ATP1A2, HCN4, CACNA1D
GO:0070613~regulation of protein processing	4	0.0416759	RNF139, PRKACA, IFT52, INPP5B	GO:0008340~determination of adult lifespan	4	0.0990396	MSH2, TP53, LRRK2, ATM
GO:0061384~heart trabecula morphogenesis	4	0.0416759	NACA, S1PR1, TGFBR3, BMP5	GO:0007009~plasma membrane organization	4	0.0990396	CAV3, A4GALT, FAT4, SPTA1
GO:1900026~positive regulation of substrate adhesion-dependent cell spreading	8	0.042066	TRIOBP, FGG, UNC13D, BRAF, FGA, DOCK5, DNM2, NET1	GO:0060391~positive regulation of SMAD protein import into nucleus	4	0.0990396	TGFBR1, SMAD4, TGFB1, BMPR1A
GO:0003007~heart morphogenesis	8	0.042066	KDM6A, FAT4, COL4A3BP, ZMIZ1, ASXL1, TGFBR3, MTOR, COL5A1	GO:0030818~negative regulation of cAMP biosynthetic process	4	0.0990396	GRM8, GRM7, AKAP6, APLP1
GO:0000922~spindle pole	18	0.0420874	CEP85, CEP104, NIN, FAM110C, ALMS1, BIRC6, CENPF, CDC20, CDC25B, CTNNB1, ANKRD53, NUDCD2, DDX11, PPP2CB, GPSM2, ODF2, CDK5RAP2, GOLGA2	GO:0070986~left/right axis specification	4	0.0990396	EPB41L5, IFT172, MNS1, ARL13B
GO:0007160~cell-matrix adhesion	16	0.042826	ITGAL, COL13A1, ITGA2, ITGA4, VCL, CTNNB1, VCAM1, SIGLEC1, CD96, FGG, MKLN1, FGA, FREM1, ITGA7, PKD1, THBS3	GO:0051213~dioxygenase activity	5	0.0991151	KDM6A, JMJD1C, ALKBH3, OGFOD3, KDM4E
hsa04720:Long-term potentiation	13	0.0428508	PLCB4, KRAS, EP300, GRIN2B, BRAF, ADCY8, GRIA1, PPP1R1A, GRIN2A, PRKACA, ITPR3, GRM1, ITPR2
GO:0043679~axon terminus	10	0.0456059	CDH8, FLRT3, SLC17A8, KCNAB2, KCNA2, KCNA1, ITGA2, DGKI, RNF40, OPRD1
GO:0000732~strand displacement	7	0.0460062	DNA2, NBN, TOP3A, BRIP1, RMI1, BRCA1, ATM
GO:0008305~integrin complex	7	0.0465676	ITGAL, ITGAE, ITGA7, ITGA2, ITGA4, MYH9, ITGAM
GO:0033017~sarcoplasmic reticulum membrane	8	0.0475752	TRDN, NOS1, RYR3, ATP2A1, RYR1, RYR2, DHRS7C, ITPR2
GO:0005875~microtubule associated complex	8	0.0475752	FNTB, MEFV, MAP1A, MAP2, MAP1B, MAP7, LRP8, MID1
GO:0034185~apolipoprotein binding	5	0.0476939	LRP1, PCSK9, LRP8, CANX, LRP4
GO:0004672~protein kinase activity	48	0.0477969	PRKCZ, PRPF4B, STK36, PTK7, FPGT-TNNI3K, RPS6KB2, CAD, EPHA10, ULK4, TTN, MAP3K6, TTBK1, COL4A3BP, PIK3C3, CDK12, DYRK4, PRKAA2, AKT3, SIK3, AATK, ERCC2, CDC7, SRPK3, PDK1, PIK3CG, EGFR, OBSCN, CSNK1G1, BRAF, NLK, MAP2K3, MAP2K4, MET, MYO3B, PKN2, ATR, CDK7, GAK, PRKD2, SCYL1, CSNK1E, SCYL2, RIPK3, NEK8, TNNI3K, MTOR, LRRK1, MELK
GO:0050853~B cell receptor signaling pathway	11	0.0483778	IGHG1, PTPRC, VAV3, PIK3CD, PLCG2, IGHV3-23, NCKAP1L, CD79A, NFATC2, IGKC, IGHM
hsa04728:Dopaminergic synapse	21	0.0487788	GNAI3, DRD3, GNAI2, PPP2R5A, KIF5A, DRD5, MAOB, PPP2R5C, GRIN2A, GRIA4, ITPR3, ATF2, ITPR2, GNAL, PLCB4, GRIN2B, GRIA1, PPP2CB, PRKACA, CACNA1A, AKT3
GO:0002027~regulation of heart rate	8	0.0487984	ANK2, FPGT-TNNI3K, TNNI3K, RYR2, PRKACA, MYH7, PDE4D, MYH6
GO:0000042~protein targeting to Golgi	6	0.0489913	RGPD4, SORL1, GOLGA4, TRIP11, BICD2, RAB33B
GO:0000038~very long-chain fatty acid metabolic process	5	0.049199	ACOX1, PEX2, ACOT2, ABCD2, SLC27A5
GO:0031100~organ regeneration	10	0.0493955	UPF2, BAAT, ATIC, PFKFB1, AXL, TGFBR3, CAD, PTPRU, HGF, LCP1
GO:0098793~presynapse	12	0.0506858	BLOC1S6, SLC6A9, SYNDIG1, CADPS2, NRXN3, OTOF, PIP5K1C, SYT17, SLC22A2, HSPA8, CACNA1A, CHAT
GO:0010468~regulation of gene expression	17	0.0514987	PHOX2B, TSHZ1, FUT8, ASIC2, HNRNPDL, SART3, TP73, ZFP36L1, STK40, ZNF683, PPP2CB, PLCG2, DDX3Y, NARFL, PIK3CA, HRG, DNMT3B
GO:0000792~heterochromatin	6	0.0516981	SMARCAD1, SALL4, RRP1B, SALL1, CHD5, DDX6
GO:0044309~neuron spine	3	0.0521001	GRIA1, DLG4, SHANK3
hsa04750:Inflammatory mediator regulation of TRP channels	17	0.0521771	PIK3CG, ADCY8, MAP2K3, PIK3CD, ASIC2, BDKRB1, ASIC1, ITPR3, ITPR2, PLA2G4A, PLCB4, PLCG2, PIK3CA, PRKACA, PIK3R1, PIK3R2, NGF
GO:0005577~fibrinogen complex	4	0.0526785	FBLN1, FGG, FGA, FN1
GO:0031095~platelet dense tubular network membrane	4	0.0526785	ATP2A1, MRVI1, ITPR3, ITPR2
GO:0005930~axoneme	14	0.0527862	BBS7, ATG14, CENPF, AMBRA1, GAS8, DNAH5, SPAG16, CCDC63, CFAP74, CFAP46, IFT172, PIK3C3, DYNC2H1, IFT140
GO:0035987~endodermal cell differentiation	7	0.0541623	COL7A1, MMP9, ITGA7, ITGA4, LAMB1, COL11A1, FN1
GO:0000794~condensed nuclear chromosome	7	0.0544525	NOL6, H2AFX, AGO3, TUBG1, RCC1, TTN, BRCA1
GO:0030016~myofibril	7	0.0544525	ACTG1, OBSCN, NRAP, KCNJ8, MYH2, MYH13, MYH6
GO:0005219~ryanodine-sensitive calcium-release channel activity	3	0.0547741	RYR3, RYR1, RYR2
GO:0070326~very-low-density lipoprotein particle receptor binding	3	0.0547741	PCSK9, RELN, LRPAP1
GO:0035374~chondroitin sulfate binding	3	0.0547741	ADGRE2, PTN, AGRN
GO:0017018~myosin phosphatase activity	3	0.0547741	MYH3, MYH6, MYH8
GO:0004982~N-formyl peptide receptor activity	3	0.0547741	GPR32, FPR1, FPR3
hsa05169:Epstein-Barr virus infection	20	0.0553049	PIK3CG, ITGAL, CR2, NFKBIE, MAP2K3, RELB, PIK3CD, MAP2K4, TP53, HLA-DQA2, HDAC1, JUN, PLCG2, PSMC1, PIK3CA, JAK1, CCNA1, AKT3, PIK3R1, PIK3R2
hsa05033:Nicotine addiction	9	0.0556905	SLC17A8, GABRE, GRIN2B, GRIA1, GRIN2A, GRIA4, CHRNA6, CACNA1A, GABRP
GO:0045876~positive regulation of sister chromatid cohesion	3	0.0557886	RAD21, DDX11, SFPQ
GO:0032119~sequestering of zinc ion	3	0.0557886	S100A8, S100A9, SLC30A7
GO:0072378~blood coagulation, fibrin clot formation	3	0.0557886	FBLN1, FGG, FGA
GO:0051572~negative regulation of histone H3-K4 methylation	3	0.0557886	KDM1A, H2AFY, BRCA1
GO:0042159~lipoprotein catabolic process	3	0.0557886	APOB, LDLR, ATM
GO:0002793~positive regulation of peptide secretion	3	0.0557886	S100A8, NPY2R, S100A9
GO:0007166~cell surface receptor signaling pathway	38	0.0561208	CALCR, ADGRA3, ADGRF1, TSPAN1, CYSLTR1, CCR1, NPY2R, ADGRF4, C5, NPY4R, ITPKB, MARCO, LILRA1, BAG1, KLRF1, ADGRB1, ADGRB3, ADGRB2, EGFR, PTPRC, COL4A3, ADGRE2, IL18RAP, GPR157, PTH2R, ADGRE5, MET, PROKR2, PROKR1, NPY5R, ADGRG4, SAG, IGSF6, LAMA1, LILRB3, ADGRL2, MPL, GLP1R
GO:0034452~dynactin binding	4	0.0563847	SNX5, HTT, BICD2, BICD1
GO:0004983~neuropeptide Y receptor activity	4	0.0563847	NPY2R, PROKR2, PROKR1, NPY5R
GO:0002162~dystroglycan binding	4	0.0563847	MAP2, AGRN, AGR3, VCL
GO:0016459~myosin complex	10	0.0570549	MYO18B, MYH1, MYH3, MYO1E, MYH2, MYO3B, MYH7, MYH6, MYO19, MYH9
GO:0009611~response to wounding	12	0.0572594	ZFP36, ZFP36L1, HHEX, SULF2, CCR1, MAP2K4, GRIN2A, PAX6, DST, TGFB1, GAP43, FN1
GO:0035845~photoreceptor cell outer segment organization	4	0.0578054	NPHP4, C2ORF71, CNGB1, IFT140
GO:0032836~glomerular basement membrane development	4	0.0578054	COL4A4, COL4A3, SULF2, MYO1E
GO:0048096~chromatin-mediated maintenance of transcription	4	0.0578054	PADI2, ARID1A, ARID1B, CTNNB1
GO:0097186~amelogenesis	4	0.0578054	MMP20, KLK4, PERP, ATF2
GO:0043589~skin morphogenesis	4	0.0578054	COL1A2, ITGA2, ERRFI1, CDSN
GO:0006338~chromatin remodeling	15	0.0581137	SMARCAD1, SATB2, RBBP4, FOXA1, TTF1, ARID1A, ARID1B, BAZ1A, HDAC1, SMARCC1, PBRM1, RUVBL1, SCMH1, RERE, SMARCA4
GO:0003682~chromatin binding	51	0.0596696	PAX6, YBX1, MEN1, FANCM, KDM1A, RAD21, DDX11, MSGN1, TPR, DNAJC2, EGFR, SATB2, RELB, TP53, MED12, TTF1, TLE4, MBD5, MBD1, NCAPD3, HHEX, NCOA1, EP300, JUN, ASH1L, KDM6B, IFT74, TSHZ1, TNRC18, KMT2A, RAG2, RCC1, POLR2B, ATF2, PBRM1, PRKAA2, POLQ, NFATC2, DNMT3B, MSH6, CEBPB, CENPF, TP73, POLR3D, DPPA2, RNF8, HDAC3, HDAC1, SFPQ, SMARCC1, RERE
GO:0000729~DNA double-strand break processing	5	0.0617664	SMARCAD1, DNA2, NBN, BRCA1, ATM
GO:0060441~epithelial tube branching involved in lung morphogenesis	5	0.0617664	KRAS, FOXA1, HHIP, DLG5, CTNNB1
GO:0006139~nucleobase-containing compound metabolic process	10	0.0619463	SLC29A2, POLR3H, DDX11, ATIC, CTPS1, BRIP1, AK2, DDX12P, PRPSAP2, ERCC2
GO:0010212~response to ionizing radiation	10	0.0619463	RFWD2, DCLRE1C, VCAM1, RNF8, H2AFX, DNMT3B, RAD54L, BRAT1, BRCA1, ATM
hsa05340:Primary immunodeficiency	8	0.0623228	DCLRE1C, PTPRC, CD8B, TAP1, RAG1, CD79A, RAG2, RFXAP
GO:0003777~microtubule motor activity	14	0.0628533	DNAH11, DNAH10, KIFC1, KIF25, KIF5A, DNAH17, DNAH3, DNAH5, KIF1C, KIF13A, KIF2B, KIF2C, DYNC2H1, KIF21A
GO:0000731~DNA synthesis involved in DNA repair	8	0.0642096	DNA2, NBN, RFC3, TOP3A, BRIP1, RMI1, BRCA1, ATM
GO:0048010~vascular endothelial growth factor receptor signaling pathway	13	0.0652935	VAV3, NCF4, WASF2, AXL, NCKAP1L, ELMO2, ACTG1, PRKD2, RHOA, PIK3CA, FOXC1, PIK3R1, PIK3R2
GO:0032922~circadian regulation of gene expression	11	0.0660494	NR1D1, DRD3, KMT2A, HDAC1, CSNK1E, RELB, PER2, KDM5A, MYBBP1A, ZFHX3, NRIP1
GO:0042060~wound healing	14	0.0669435	EGFR, S100A8, DRD5, VANGL2, ARHGEF19, PTK7, GRHL3, IL24, DCN, C6ORF89, FNTB, MACF1, MTOR, FN1
hsa04520:Adherens junction	13	0.0687694	EGFR, ACTG1, IGF1R, EP300, PTPRF, NLK, WASF2, MET, RHOA, CTNND1, CTNNA3, CTNNB1, VCL
GO:0060326~cell chemotaxis	12	0.0690192	CXCL1, VCAM1, GPR32, SAA2, C5, FPR1, FPR3, KIT, HGF, CCL15, ELMO2, EPHA2
GO:0047485~protein N-terminus binding	16	0.0690656	ACOX1, NBN, PDLIM5, TP53, DCN, ATM, TGFB1, MEN1, NCOA1, NCOA3, HDAC1, SMARCC1, EXOC4, GAD1, ERCC2, SMARCA4
GO:0014701~junctional sarcoplasmic reticulum membrane	4	0.069818	TRDN, JPH2, RYR1, RYR2
GO:0005916~fascia adherens	4	0.069818	NRAP, CTNNA3, CTNNB1, VCL
GO:0097539~ciliary transition fiber	4	0.069818	NIN, CENPF, TCHP, ODF2
GO:0001750~photoreceptor outer segment	10	0.0702092	PROM1, MYRIP, BBS7, MAP1B, C2ORF71, PCDH15, CNGB1, OCRL, SAG, IFT140
GO:0098609~cell-cell adhesion	37	0.071157	SNX5, CHMP4B, PDLIM5, EIF5, WASF2, ASAP1, CAPZB, PRDX1, PAK6, EFHD2, ATXN2L, MACF1, SH3GLB1, ATIC, PPL, HSPA8, AHNAK, PLEC, GOLGA2, ENO1, FLRT3, DOCK9, PKN2, PI4KA, LYPLA2, GLOD4, ELMO2, EPHA2, MARK2, DDX6, SCYL1, FNBP1L, EIF4H, CCT8, RUVBL1, PERP, YKT6
GO:0043525~positive regulation of neuron apoptotic process	9	0.0713327	CASP9, JUN, MAP2K4, TP53, PCSK9, NQO1, ATM, CTNNB1, ATF2
hsa04921:Oxytocin signaling pathway	23	0.0718561	EGFR, GNAI3, GNAI2, ADCY8, PPP1R12B, CACNG7, PRKAG2, MYLK4, ITPR3, ITPR2, ACTG1, PLA2G4A, PLCB4, KRAS, JUN, RYR3, RHOA, RYR1, RYR2, PRKACA, PRKAA2, NFATC2, NFATC1
GO:0050714~positive regulation of protein secretion	8	0.0729027	FGG, FGA, ARF1, PPIA, ATP13A2, TGFB1, IL1A, EXOC1
GO:0008270~zinc ion binding	136	0.0731157	APOBEC2, CNDP1, S100A8, MMP9, PDLIM5, S100A9, UTRN, IDE, ZNF638, RNF215, TRIM51, ZNRF3, CNOT4, FNTB, TRIM48, BRPF1, GRIN2B, CPA2, RBCK1, RARB, LONRF2, RNF32, RNF220, GRIN2A, UBR4, EARS2, BAZ1A, UHRF2, EP300, TRIM33, MIB2, RNF139, RAD18, ZZZ3, PRDM2, RNF17, ZFAND4, DIDO1, TRIM71, TTC3, LHX8, ZMYM1, AGBL1, ZMYM4, ZMYM3, ZMYM6, NR4A2, MUL1, RNF207, ATP13A2, TRIM62, SHANK3, BRCA1, RNF8, CAPN15, TET3,…
GO:0034237~protein kinase A regulatory subunit binding	5	0.0736489	RYR2, PRKACA, C2ORF88, AKAP1, KCNQ1
GO:0008013~beta-catenin binding	14	0.0737588	DVL3, SHROOM2, GRIP1, NR4A2, MED12, PTPRU, CTNNA3, VCL, EP300, SALL1, BCL9L, DLG5, KDM6B, APC
GO:0042805~actinin binding	4	0.0745777	PROM1, TRPC5, PDLIM5, TTN
GO:2001234~negative regulation of apoptotic signaling pathway	5	0.0758512	WNT4, CTH, TMBIM6, NR4A2, CTNNB1
GO:0033365~protein localization to organelle	5	0.0758512	ANK2, CROCC, PAX6, CNGB1, BICD1
GO:0006468~protein phosphorylation	58	0.0761309	PRPF4B, STK36, PRKAG2, RPS6KB2, TGFB1, MAP3K6, COL4A3BP, PIK3C3, PIK3CA, PRKACA, CDK15, SIK3, AKT3, SRPK3, PIK3CG, CCNK, BRAF, MYO3B, MYLK4, PIK3CD, PKN2, CDK7, MARK1, MARK2, GAK, PDIK1L, PRKD2, MAST2, SCYL2, NEK8, TNNI3K, LRRK1, PRKCZ, PTK7, FPGT-TNNI3K, ULK4, STK40, LMTK2, PRKAA2, PIK3R1, RUNX3, ERCC2, AATK, PDK1, OBSCN, TAF1, ALPK3, NLK, BIRC6, ATM, CDC25B, GLYCTK, CSNK1E, JAK1, GRK4, MTOR, BM…
GO:0031643~positive regulation of myelination	4	0.0763983	TENM4, DICER1, MYRF, HGF
GO:0044070~regulation of anion transport	4	0.0763983	LRRC8A, LRRC8C, LRRC8D, AHCYL1
GO:0048935~peripheral nervous system neuron development	4	0.0763983	HOXD9, ISL2, ETV1, RUNX3
GO:0009897~external side of plasma membrane	29	0.0795307	ADGRA3, IGHG1, LDLR, CD8B, VTCN1, ITGAE, CCR1, ASTN1, KIT, IGHM, VCAM1, FGG, S1PR1, ECE1, FGA, IGHV3-23, IGKC, PTPRC, ITGA2, ABCG1, CLPTM1, LILRB1, CDH13, TFRC, TGFBR3, ANTXR2, CD79A, CD200R1L, MUC17
GO:0010501~RNA secondary structure unwinding	9	0.0796464	DDX23, DDX24, DDX3Y, AGO1, DDX50, DDX31, AGO3, DDX54, DDX6
GO:0016241~regulation of macroautophagy	9	0.0796464	ATP6V1C2, SH3GLB1, SNX5, EXOC4, SNX32, PRKAA2, ATP13A2, ATP6V0B, EXOC1
hsa04066:HIF-1 signaling pathway	16	0.0802001	PDK1, PIK3CG, EGFR, PIK3CD, RPS6KB2, IGF1R, EP300, TFRC, PLCG2, PIK3CA, MTOR, AKT3, PIK3R1, EPO, PIK3R2, ENO1
hsa04971:Gastric acid secretion	13	0.0814951	KCNJ16, GNAI3, GNAI2, ADCY8, MYLK4, ATP1A3, ITPR3, KCNK2, ITPR2, PLCB4, PRKACA, KCNQ1, SLC9A1
GO:0008017~microtubule binding	29	0.081634	GAS2L3, KIFC1, KIF25, LZTS1, S100A8, S100A9, KIF2B, KIF13A, MACF1, CEP57, CDK5RAP2, KIF21A, MX2, CHD4, GOLGA2, SGIP1, APC, MTUS2, CCDC88A, KIF5A, MAP1A, MAP1B, GAS8, MID1, KIF1C, MAST2, MAP2, MAP7D3, DNM2
GO:0000781~chromosome, telomeric region	9	0.0830096	DOT1L, RNF8, NBN, TP53BP1, SMC5, H2AFX, SPO11, ATM, SETX
GO:0021915~neural tube development	7	0.0835477	ZFP36L1, STIL, PKD1, AMBRA1, TRIM71, TGFB1, EPHA2
GO:1900034~regulation of cellular response to heat	13	0.0837394	NUP98, ATR, ATM, RPTOR, HSPH1, NUP214, EP300, BAG1, MTOR, POM121C, TPR, DNAJC2, HSPA8
GO:0030168~platelet activation	18	0.0840012	PIK3CG, VAV3, F8, AXL, DGKK, DGKI, ITPR3, ITPR2, DGKA, FGG, FGA, P2RX1, PLCG2, COL1A2, RHOA, PIK3CA, HRG, PIK3R1
GO:0022820~potassium ion symporter activity	3	0.0851705	SLC12A6, SLC12A9, SLC12A5
GO:0043559~insulin binding	3	0.0851705	IGF1R, IDE, PIK3R1
GO:0015379~potassium:chloride symporter activity	3	0.0851705	SLC12A6, SLC12A9, SLC12A5
GO:0035004~phosphatidylinositol 3-kinase activity	3	0.0851705	PIK3CG, PIK3CD, PIK3CA
GO:0031982~vesicle	19	0.0855818	PRKCZ, TSPAN1, CHMP4B, SLC6A14, GLT6D1, ATP13A2, GAK, LRPAP1, SLC34A2, PROM1, NOD2, ECE1, RHOA, CETP, BMP5, AHNAK, SLC30A7, MUC16, OPRD1
GO:0005578~proteinaceous extracellular matrix	35	0.0861246	PODN, COL21A1, MMP9, LTBP4, ELN, GPLD1, TGFB1, WNT4, MMP20, WISP1, COL6A3, FBN3, COL11A1, FN1, SBSPON, COL4A4, FLRT3, COL4A3, HAPLN1, TNXB, CRTAC1, SPARCL1, EFEMP1, CILP, COL16A1, COL5A1, SLIT3, MMP11, LAMA1, FBLN1, COL1A2, TGFBR3, RELN, NCAN, COL24A1
GO:0000212~meiotic spindle organization	3	0.0866872	ESPL1, TUBG1, MYH9
GO:0036438~maintenance of lens transparency	3	0.0866872	CHMP4B, FOXC1, MUC5AC
GO:0032264~IMP salvage	3	0.0866872	PRTFDC1, AMPD2, AMPD1
GO:0010894~negative regulation of steroid biosynthetic process	3	0.0866872	WNT4, INSIG2, BMP5
GO:0098735~positive regulation of the force of heart contraction	3	0.0866872	NOS1, RYR2, SLC9A1
GO:0000904~cell morphogenesis involved in differentiation	3	0.0866872	RELN, MYH9, CTNNB1
GO:0009986~cell surface	65	0.0876303	ARSB, KCNC1, LDLR, LRRC8A, IDE, CLSTN1, L1CAM, IGHM, HLA-DMA, TGFB1, CLEC17A, NOD2, DIP2A, WNT4, GRIN2B, ANK3, LTF, ROBO2, HHIP, EGFR, ERP29, GRIN2A, BSN, LRPAP1, IGSF3, GPA33, SPTB, KCNH5, ITGAL, ABCA7, RTP1, KCNA1, DEFB129, ITGAM, VCAM1, FGG, FGA, LRRTM1, PCSK9, PKD1, PTN, KRT4, LRFN4, EPO, PTPRC, MET, AXL, ITGA2, CD1B, ABCB1, ITGA4, ASIC1, KCNK2, FZD4, EPHA2, PROM1, TFRC, SULF2, GRIA1, CD209, …
GO:0019901~protein kinase binding	48	0.0878627	PRKCZ, PPP1R12B, ATG13, UTRN, PRKAG2, PAX6, PTPN23, CTNND1, SPDYE6, CLTC, TTN, PTEN, ATF2, CTNNB1, NOD2, FAM83B, CASP9, ANK2, PIWIL1, GYS1, PKD1, H2AFY, PRKACA, CDK5RAP2, ERRFI1, GOLGA2, APC, SLC12A6, ZFP36, EGFR, SASH1, EEF1A1, PTPRC, CCNK, MAP2K3, SLC12A5, TP53, CDC5L, MYH6, CENPJ, RPTOR, TP73, SPDYC, CDC25B, AP2A2, MTOR, FAF1, DNM2
GO:0051726~regulation of cell cycle	19	0.0883919	PTPRC, RBBP4, PHACTR4, RBL2, CENPF, PTEN, ATM, DOT1L, NUP214, UHRF2, EP300, JUN, TSC2, PUM1, PER2, CDK12, CDK15, MX2, HSPA8
GO:0060048~cardiac muscle contraction	9	0.0885112	ATP1A3, PIK3CA, RYR2, MYH7, MYH6, MTOR, TTN, KCNQ1, TNNI1
GO:0008542~visual learning	9	0.0885112	KRAS, BRAF, DRD3, KMT2A, GRIN2A, ATP1A3, KIT, MTOR, RIC8A
GO:0005001~transmembrane receptor protein tyrosine phosphatase activity	5	0.08881	PTPRC, PTPRE, PTPRF, PTPRH, PTPRU
GO:0016442~RISC complex	4	0.0891062	DICER1, AGO1, AGO3, DDX6
GO:0031588~nucleotide-activated protein kinase complex	4	0.0891062	PRKAG2, PRKACA, PRKAA2, SESN2
GO:0006974~cellular response to DNA damage stimulus	29	0.0895629	ARMT1, BOD1L1, SETX, ATF2, MEN1, CASP9, DDX11, FANCF, H2AFX, NFATC2, POLQ, FBXO45, APC, TAF1, CCNK, VAV3, TP53BP1, TP53, SMC5, ATR, HERC2, BRAT1, BRCA1, ATM, TANK, TP73, RNF8, USP47, RAD18
GO:0007050~cell cycle arrest	21	0.0909346	NBN, PRKAG2, TP53, CDK7, RPTOR, TP73, ATM, TGFB1, JMY, CUL3, MFN2, PPM1G, HEPACAM, IRF6, TSC2, PKD1, MTOR, PRKAA2, ZFHX3, APC, DHCR24
GO:2000785~regulation of autophagosome assembly	5	0.0913934	PIKFYVE, RAB1B, AMBRA1, RAB33A, RAB33B
GO:0010460~positive regulation of heart rate	5	0.0913934	TACR3, HEY2, AVPR1A, RYR2, KCNQ1
GO:0005768~endosome	30	0.0914203	PRKCZ, LDLR, CHMP4B, SORL1, ASTN1, PTPN23, ATP6V0B, BLOC1S6, WDR72, S1PR1, ECE1, RHOA, SLC30A3, LEPROT, RNF32, EGFR, MLC1, ATG9A, BIRC6, TCN2, ABCG1, LRPAP1, LRP1, TFRC, AVPR1A, HGS, SNX32, YKT6, NGF, DNM2
hsa04261:Adrenergic signaling in cardiomyocytes	21	0.0914223	GNAI3, GNAI2, ADCY8, PPP2R5A, CACNG7, PPP2R5C, ATP1A3, MYH7, MYH6, ATF2, ATP2B2, PLCB4, PPP1R1A, PPP2CB, RYR2, RAPGEF4, PRKACA, SCN7A, KCNQ1, AKT3, SLC9A1
GO:0005604~basement membrane	13	0.0920025	COL4A3, HSPG2, COL5A1, LAMA1, FBLN1, HMCN1, COL7A1, FREM1, PTN, LAMB1, DST, USH2A, THBS4
GO:0030049~muscle filament sliding	8	0.0922658	TNNT3, MYH3, MYH2, MYH7, MYH6, TTN, MYH8, TNNI1
GO:0042157~lipoprotein metabolic process	8	0.0922658	APOB, LRP1, HSPG2, PCSK9, PRKACA, CETP, APOL4, ABCG1
GO:0035091~phosphatidylinositol binding	14	0.0922872	SNX19, CCDC88A, SH3PXD2A, SNX5, HIP1R, MYO1E, NCF4, SNX25, RAG2, ITPR3, ZCCHC14, ITPR2, SBF2, SNX32
GO:0030674~protein binding, bridging	13	0.0923585	TRDN, MEN1, FLRT3, DVL3, CNKSR1, FGG, FGA, ANK2, ANK3, COL1A2, COL11A1, RPTOR, SLC9A1
GO:0031093~platelet alpha granule lumen	10	0.093206	FGG, FGA, SERPINA3, F8, HRG, HGF, MMRN1, QSOX1, TGFB1, FN1
hsa00310:Lysine degradation	10	0.0943551	DOT1L, KMT2D, KMT2A, PLOD1, ALDH1B1, EHHADH, KMT2C, ASH1L, AASS, SETD2
GO:0008201~heparin binding	23	0.0947016	TNXB, PTPRF, COL13A1, CCL15, GREM2, COL5A1, SLIT3, LRPAP1, APOB, WISP1, TENM1, NAV2, CFH, LTF, PTN, TGFBR3, HRG, LIPI, GPNMB, THBS3, PLA2G5, FN1, THBS4
GO:0005796~Golgi lumen	15	0.0949804	HSPG2, DCN, MUC6, TGFB1, RAB33B, PROC, MMP11, WNT4, AGRN, MUC5AC, NCAN, MUC5B, MUC17, NGF, MUC16
GO:0035259~glucocorticoid receptor binding	4	0.0949896	CEBPB, GRIP1, NR4A2, NRIP1
GO:0032092~positive regulation of protein binding	11	0.0953168	MEN1, TAF1, EP300, EPB41, HIP1R, PKD1, SPTA1, PLXND1, LFNG, USP33, ADD2
GO:0001523~retinoid metabolic process	11	0.0953168	ALDH1A1, PNLIP, APOB, LRP1, PLB1, RBP1, HSPG2, LRP8, AGRN, CYP4V2, ABCA4
GO:0001933~negative regulation of protein phosphorylation	11	0.0953168	MEN1, FBLN1, KIRREL, ATG14, PAX6, BDKRB1, MTOR, KIRREL2, IGFBP3, PTEN, TGFB1
GO:0035235~ionotropic glutamate receptor signaling pathway	6	0.0954931	GRIN2B, GRIA1, GRIK3, GRIN2A, ATP1A3, GRIA4
GO:0045446~endothelial cell differentiation	4	0.0972353	BMPER, S1PR1, PTN, KDM6B
GO:0009312~oligosaccharide biosynthetic process	4	0.0972353	ST6GALNAC5, FUT8, FUT3, ST6GALNAC1
GO:0034374~low-density lipoprotein particle remodeling	4	0.0972353	APOB, PLA2G7, CETP, ABCG1
GO:0045176~apical protein localization	4	0.0972353	HCN1, SHROOM2, VANGL2, DLG5
GO:0032993~protein-DNA complex	6	0.0972502	HHEX, NFYC, CDC5L, KDM5A, CHD4, CTNNB1
GO:0016581~NuRD complex	5	0.0975752	RBBP4, HDAC1, SALL1, CHD5, CHD4
GO:0003151~outflow tract morphogenesis	9	0.0979239	JUN, NPY2R, HEY2, RYR1, TGFBR3, PLXND1, GJA5, NPY5R, ATF2
GO:0030425~dendrite	42	0.0995135	KCNC1, GNAI2, RAP1GAP, GRIP1, GRIK3, KCNA2, KCNA1, DICER1, RCVRN, TTLL7, AZIN2, PLCB4, NR1D1, ANK3, SHARPIN, TRIM9, HTR1D, KNDC1, TUBB3, HTR1E, CPT1C, HCN1, NCDN, HTT, TRPC5, ZDHHC5, SACS, BSN, GRIA4, GRM1, RPTOR, LRP1, ZFYVE27, GRIA1, GRK4, RELN, LRP8, MTOR, BMPR1B, IGSF9, CACNA1A, LRP4
GO:0005887~integral component of plasma membrane	209	7.63277e-09	CADM3, ADCY2, CADM2, ADORA1, CD48, CD47, AGTR1, ATP2B4, CHRNA9, CD46, RAPGEF2, PTPRK, SLC12A7, PTPRG, LIFR, CRHR2, CD36, CCR5, TMPRSS11F, MST1R, CLCN1, IL1R1, CLCN2, EPHB3, EPHB1, KCNMB2, EPHB6, EMB, TRPC3, IL1RL2, TRPC7, KCNK1, EPHA1, KDR, EPHA5, NOTCH2, SEMA6A, EPHA4, EPHA7, EPHA6, NTRK1, NOTCH4, AVPR1B, KCNH1, PCDHA6, PCDHA8, GLRA1, PCDHA2, PCDHA4, PCDHA5, PCDHA1, SLC26A2, EDNRA, LNPEP, OR9A4,…
GO:0005886~plasma membrane	513	1.72498e-08	ALPPL2, SCN3A, AGTR1, ADTRP, FAP, SERPINE1, ADAM7, ROS1, VNN2, MAGI3, MAGI2, TTC7A, MAGI1, ROCK2, LIFR, PTPRN, CTNNA1, IGKV1-5, F5, SLC9C1, MST1R, GRB14, OR10K2, IL1R2, ADSS, IL1R1, SCN1A, EMCN, OR2T4, ZAP70, HLA-DRB5, KCNK1, ACPP, PCDH18, FNIP2, PKP1, RGS5, AVPR1B, MAP4, RGS7, SYTL3, TNK2, SMURF1, RTN4, KCNH1, GLRA1, KCNAB1, LY9, LNPEP, NISCH, SMAP1, TRPV5, SLC22A4, SLC22A5, DPP6, HTR5A, IHH, ZD…
GO:0007156~homophilic cell adhesion via plasma membrane adhesion molecules	40	2.62035e-07	PCDHA6, ME1, CADM3, PCDHA8, CLSTN2, PCDHA2, CADM2, PCDHA4, PCDHGA9, PCDHA5, PCDHB14, PCDHB13, PCDHGC4, PCDHGC3, PCDHGA5, PCDHA1, PCDHGA2, PCDHAC2, PCDHGA1, CDH6, PCDHGB1, PCDH1, CDH9, ROBO1, FAT1, PCDHA10, PCDHA11, PCDHA13, PCDHGA10, PCDHB5, CDHR2, PCDHB4, SDK1, PCDHGB6, CELSR3, PCDHB2, PCDHGB5, PCDH18, CDH12, TENM3
GO:0018108~peptidyl-tyrosine phosphorylation	33	0.0001055	STK16, FGFR3, NEK1, DSTYK, FGF10, TTK, EPHB3, DDR2, EPHB1, SGK223, ZAP70, DYRK3, NRG1, EGF, FGF2, CSF1R, TEC, IL5, RYK, FLT4, TRIM27, EPHA1, KDR, WEE2, EPHA5, EPHA4, EPHA7, EPHA6, BAZ1B, FGFR1OP, NTRK1, MST1R, MERTK
GO:0007155~cell adhesion	75	0.000116584	NRP2, PCDHA6, PCDHA8, MAEA, PCDHA2, PCDHA4, PCDHA5, BCAN, EDIL3, PCDHA1, DDR2, CD47, AZGP1, GP5, WISP3, ROBO1, FAP, COL12A1, CNTNAP2, ZYX, LOXL2, BOC, PTPRK, ASTL, MAGI1, PCDHB4, PCDHB2, ACKR3, ACTN2, CD164, CTNNA1, PRKCE, SSPO, FARP2, CTNNA2, TNFAIP6, DDR1, CD36, SUSD5, VCAN, CNTN4, CNTN3, CHL1, CTNND2, ITGA10, PCDHGC4, SPOCK1, PCDHGC3, PCDHAC2, CDH6, SEMA5A, LAMB4, LAMB2, ITGB8, SORBS2, FAT1, I…
GO:0035023~regulation of Rho protein signal transduction	21	0.000205675	ALS2, DLC1, ARHGEF4, ECT2L, ARHGEF2, ARHGEF26, ARHGEF38, ARHGEF37, ARHGEF5, TRIO, ECT2, ARHGEF10, FARP2, ARHGEF11, MCF2L2, PLEKHG1, TIAM2, RASGRF2, SOS1, FGD5, KALRN
GO:0005737~cytoplasm	593	0.00024063	CCZ1B, MEF2C, DLC1, PTGS2, SCN3A, AIF1, NAA15, STRN, RP9, CMTR1, MAP3K4, CUL7, CUL9, FAP, CDCA2, PLS1, ZNF395, DHX36, DHX30, CCAR2, MAGI2, TTC7A, MAGI1, RREB1, DCDC2, SKP1, PCM1, MECOM, PROX1, BTBD9, CTNNA2, PELO, GRB14, IRAK1BP1, IL1R2, ADSS, UBA6, PRRC2A, WARS2, ACP1, URGCP, T, ARG1, PFN2, ZAP70, FAM162A, RCHY1, FH, RANBP17, ODC1, DNMT3A, ARHGEF38, ARHGEF37, MSTN, C3ORF20, FNIP2, RGS5, MAP4, SM…
GO:0005089~Rho guanyl-nucleotide exchange factor activity	20	0.000251797	ALS2, ARHGEF4, ECT2L, ARHGEF2, ARHGEF26, ARHGEF38, ARHGEF37, ARHGEF5, TRIO, ECT2, ARHGEF10, ARHGEF11, FARP2, MCF2L2, PLEKHG1, TIAM2, RASGRF2, SOS1, FGD5, KALRN
GO:0010811~positive regulation of cell-substrate adhesion	13	0.000345095	COL26A1, EGFLAM, FBLN2, NPNT, DMP1, CCDC80, NID1, EDIL3, PRKCE, AGR2, ABI3BP, NDNF, EMILIN1
GO:0007399~nervous system development	50	0.000421429	MEF2C, PCDHA6, PCDHA8, PCDHA2, PCDHA4, PCDHA5, PAX3, PCDHA1, CSPG5, ADORA1, GDNF, PCDH1, ROBO1, NRG1, FGF2, DLG1, SOX14, LIMK1, PCDHB4, PCDHB2, DCTN1, ARHGAP26, CHRM3, CHRM2, ADGRV1, CNTN4, CNTN3, CLN8, INTU, KALRN, CPLX2, SPOCK1, PCDHAC2, SEMA5A, CRMP1, GBX2, PCDHA10, PCDHA11, SH2B2, SIM1, FZD9, PHF10, DPYSL2, PCDH18, CSGALNACT1, SDHA, NOTCH2, MEF2D, SEMA6A, HDAC4
hsa04360:Axon guidance	27	0.000598551	PLXNA1, PLXNA2, EPHB3, EPHB1, SEMA5A, EPHB6, PAK2, SEMA3G, ROBO1, SEMA3F, SEMA3E, SEMA3D, SEMA3C, UNC5C, PPP3CA, RASA1, LIMK1, ROCK2, DPYSL2, EPHA1, SLIT2, EPHA5, EPHA4, SEMA6A, NCK2, EPHA7, EPHA6
GO:0030198~extracellular matrix organization	37	0.00059886	PXDN, PDGFA, NPNT, DAG1, BCAN, ITGA10, DDR2, ABI3BP, CD47, LAMB2, ITGB8, HPSE, SERAC1, ITGB6, SERPINE1, FBN2, FGF2, COL10A1, OLFML2B, DMP1, C6ORF15, CCDC80, ITGA1, NID1, COL5A2, NDNF, KDR, EMILIN1, LAMA2, CSGALNACT1, DDR1, LAMA4, EGFLAM, COL19A1, VCAN, APBB2, DNAJB6
GO:0005578~proteinaceous extracellular matrix	45	0.000815557	WNT5A, FMOD, PXDN, LTBP1, ADAMTS19, SPOCK3, ADAMTS16, NPNT, BCAN, SPOCK1, WNT2, COL26A1, WISP3, HPSE, SERAC1, TNN, FBN2, WNT6, GPC1, MYOC, DPT, COL10A1, WNT10A, BMP1, ZP3, PTPRZ1, ZP4, OLFML2B, DMP1, CRTAP, MEPE, COL5A2, SLIT2, NDNF, EMILIN1, MUC4, ADAMTS9, COL19A1, FBLN2, VCAN, WNT9A, ADAMTS3, WNT7A, CHL1, ADAMTS4
GO:0009790~embryo development	12	0.00136099	MDFI, BAG6, NOTCH4, UBR3, PDGFC, NRG1, STOX2, FOXI1, RASA1, TRIP12, AKIRIN2, TGFB2
GO:0023014~signal transduction by protein phosphorylation	13	0.00148316	KCNH1, STK25, NEK1, STK10, TGFB2, KDR, MAP4K4, PAK2, MAP3K19, KCNH8, NEK4, KCNH2, ROS1
GO:0042391~regulation of membrane potential	18	0.00167395	KCNH1, GLRA1, ATP1A4, ACTN2, PXK, NTSR2, RIMS1, SLC26A2, ABCB5, SLC26A3, SLC26A8, SLC26A9, DLD, KCNH7, KCNH8, KCNH2, HCN3, DLG1
GO:0032755~positive regulation of interleukin-6 production	13	0.00183224	WNT5A, ARHGEF2, ZBTB20, IL1RL2, TBC1D23, MYD88, NOD1, CD36, MAPK13, HSPD1, AKIRIN2, TMED7-TICAM2, IL36A
GO:0050919~negative chemotaxis	11	0.00195376	NRP2, SEMA5A, SEMA6A, EPHA7, SEMA3G, PDGFA, SEMA3F, SEMA3E, SEMA3D, SEMA3C, SLIT2
GO:0030027~lamellipodium	29	0.00266624	ALS2, NRBP1, HAX1, AIF1, SNX2, DAG1, KLHL2, DYSF, TIAM2, SORBS2, FAP, FAT1, FGD5, CLRN1, FSCN1, VIL1, PALLD, CTNNA1, RAPH1, RUFY3, CTNNA2, ARHGAP31, MYO10, PLEKHH2, MCC, RAB13, APBB2, ARAP3, MYLK
GO:0005769~early endosome	38	0.00269145	ALS2, CYTIP, CCDC93, AP1AR, SNX17, F2RL1, RABGAP1L, SAMD9L, NISCH, DYSF, SLC35D3, ZFYVE16, DNER, TRAK1, CNTNAP2, FGD5, STAMBP, HAVCR2, PARM1, WDFY1, MYO1B, TRIM27, ACKR1, ACKR3, CFTR, VPS41, GPER1, KDR, VPS8, LAMP3, IGF2R, NTRK1, TGFBRAP1, KIAA0319, COMMD1, HSPD1, SNX13, TMED7-TICAM2
GO:0005783~endoplasmic reticulum	109	0.00300372	SLC36A1, PTGS2, WFS1, CRHBP, ADORA1, TAPBP, BAK1, BRINP2, PLOD3, B3GALNT2, ERAP1, ELOVL6, BRINP3, DISC1, TOR1AIP2, CRTAP, RAP1GDS1, STIM2, HLA-B, MOGS, HLA-F, ADAMTS9, CATSPER3, FAM172A, CNBP, EXTL3, FGFR3, HAX1, LRBA, CERS6, SLC38A11, EPM2AIP1, CALU, CERS2, NRROS, DDX41, FGD5, UGT2B28, UFSP2, HACE1, YTHDC2, REEP1, HS1BP3, REEP2, REEP4, KDR, ATF6, EPHA4, GPR37, KIAA0922, AGR2, RTN4, CYB5R4, PXDN,…
GO:0030425~dendrite	51	0.00309024	ALS2, KCNH1, LRIT3, ADCY2, GLRA1, WFS1, MLPH, CRHBP, GABRB1, GABBR1, TP63, BRINP2, CNTNAP2, BRINP3, ADCY10, NRG1, HTR5A, PTPRK, MAGI2, TANC1, GPER1, PSD2, GRM2, CHRM3, CHRM2, PIAS3, GRM7, GRM6, CHL1, COBL, CPLX2, CTNND2, EPHB3, EPHB1, RGS12, DNER, KIF21B, HCN3, PRSS12, DPYSL2, CAPN2, KCNK1, RUFY3, EPHA5, EPHA4, PPP1R9A, EPHA7, PLK2, NTRK1, TENM2, SLC5A7
GO:0005003~ephrin receptor activity	6	0.00321721	EPHA5, EPHA4, EPHB6, EPHA6, EPHB3, EPHB1
GO:0035556~intracellular signal transduction	61	0.00347845	ADCY2, NRBP1, ADCY5, RP1L1, CLNK, PRKAR2A, NOD1, MAP3K4, STAC, TIAM2, TLK1, DEPDC1B, ADCY10, RAPGEF2, NRG1, ARHGEF4, ARHGEF2, SGK1, MAGI3, ZP3, ZP4, ARHGEF5, MLXIPL, PRKCI, DCDC2, PRKCE, ECT2, MAP4K4, FMN2, MAST4, TNS3, CAMK4, LAX1, PSEN2, ASB1, ASB5, KALRN, STYXL1, STK17B, ASB14, PLCL2, PLCL1, STK32B, DGKB, DGKD, ZAP70, SH2B2, PLCD1, INPP5D, RASA1, RASA2, TEC, FYB, PPP1R17, SH3BP5, TULP4, RPS6KA…
GO:0008285~negative regulation of cell proliferation	60	0.00368763	DLC1, DLEC1, PTGS2, FGFRL1, RBM5, BAP1, STRN, FGF10, REST, COPS8, GLI3, ADORA1, IL10, TGFB2, AZGP1, BAK1, BNIPL, SERPINE2, NOS3, RAPGEF2, FGF2, CUL1, PTPRK, MAGI2, DLL1, GPER1, CD164, PROX1, DDR1, NCK2, DIS3L2, TFAP2A, WNT9A, FRK, POU1F1, MSX2, BCHE, DPT, CSF1R, DFNA5, KAT2B, TAF6, JARID2, VHL, WDR6, ITGA1, PTPN14, CSNK2B, FZD5, PLG, FEZF1, TMEM115, NOTCH2, HDAC4, SH3BP4, RPS6KA2, NTRK1, DNAJB2, …
GO:0048843~negative regulation of axon extension involved in axon guidance	9	0.00401179	SEMA5A, WNT5A, SEMA6A, SEMA3G, RYK, SEMA3F, SEMA3E, SEMA3D, SEMA3C
GO:0031526~brush border membrane	13	0.004055	SLC26A3, CD36, ITLN1, CDHR2, SLC34A1, NPC1L1, SLC3A1, SLC22A5, KCNK1, LRP2, ATP6V0A4, SLC6A18, SLC6A19
GO:2000360~negative regulation of binding of sperm to zona pellucida	4	0.00425878	OVGP1, ASTL, ZP3, ZP4
GO:0045499~chemorepellent activity	9	0.00479697	SEMA5A, SEMA6A, EPHA7, SEMA3G, SEMA3F, SEMA3E, SEMA3D, SEMA3C, NRG1
GO:0031901~early endosome membrane	22	0.00574986	KCNH1, STAM2, SNX2, SNX4, CFTR, HLA-B, FZD5, FIG4, EPHB1, HLA-G, HLA-F, EPHA4, DNAJC13, RBSN, NTRK1, ZFYVE16, ZFYVE28, TMEM165, TMEM184A, KIAA0319, SNX13, TMED7-TICAM2
GO:0001764~neuron migration	21	0.00601248	MEF2C, ELP3, TBX20, DCDC2, CELSR3, SPOCK1, PCM1, NDNF, NRCAM, FEZF1, SEMA6A, POMGNT2, DNER, KIAA0319, APBB2, RAPGEF2, ADGRL3, ASPM, CHL1, DISC1, PITX2
GO:0009986~cell surface	74	0.00628661	KCNH1, MICB, HFE2, CLSTN2, SLC6A1, PDGFA, ADGRF5, FGF10, CXCR2, CSPG5, LY9, ROBO1, CD46, FAP, TPO, CNTNAP2, PDGFC, WNT6, ROS1, RAMP3, PTPRK, HYAL2, SCUBE3, SLC34A1, ACKR3, CFTR, HLA-B, SLIT2, SLC7A11, HLA-F, ADAMTS9, CD86, EGFLAM, CD36, CCR5, ADGRV1, IGF2R, ULBP2, SLC26A9, VAMP5, MST1R, ADGRA2, KCNH2, INTU, ADAM15, WNT5A, PPFIA4, IL1R1, FGFR3, CD109, HMMR, EPHB6, ITGB8, TNN, CD28, CSF1R, PLAT, HA…
GO:0005540~hyaluronic acid binding	8	0.00699131	TNFAIP6, HYAL2, STAB1, C6ORF15, BCAN, SUSD5, VCAN, HMMR
GO:0007015~actin filament organization	16	0.00705142	CLRN1, ARHGEF2, FSCN3, MYO1B, FSCN1, PRKCI, CTNNA1, RUFY3, PPARGC1B, TPM3, NCK2, PPP1R9A, SORBS2, FAT1, BIN3, DLG1
GO:0001822~kidney development	18	0.00743175	ODC1, HYAL2, KIF3A, WFS1, PKHD1, TIPARP, SLC34A1, SIX2, C5ORF42, TET2, PROX1, TGFB2, TRAF3IP1, AGTR1, BAG6, AGT, PAX8, TFAP2A
GO:0031594~neuromuscular junction	13	0.00769267	SPOCK1, PDZRN3, HDAC4, EPHA4, PPP1R9A, EPHA7, COLQ, SERPINE2, CAMK2D, FCHSD1, SV2A, NRG1, DLG1
GO:0007413~axonal fasciculation	7	0.0080982	SEMA5A, RTN4, NRCAM, CNR1, CELSR3, CNTN4, EPHB3
GO:0048557~embryonic digestive tract morphogenesis	7	0.0080982	TCF7, NIPBL, HLX, SIX2, FGF10, GLI3, PITX2
GO:0005829~cytosol	374	0.00832499	MEF2C, ALDH8A1, DLC1, ALS2, AIF1, VPS54, VPS52, PGAM2, SYT6, RNF216, CCT3, PTTG1, REST, OGDH, GET4, BAK1, MYD88, SERPINE2, STAC, CUL7, BRPF3, GAB1, ERAP1, RAB24, LSM3, DHX36, DEPDC1B, RAPGEF2, CUL1, KIF13B, STAG1, ANAPC1, ROCK2, SUCLG1, ANAPC4, RAP1GDS1, VPS41, AP4M1, SKP1, CTNNA1, MECOM, PCM1, DCTN1, CTNNA2, FARP2, CAMK4, SULT1B1, BHMT, GRB14, MDH1, ADSS, DAG1, UBA6, DENND2A, EPHB3, RIMS1, EPHB1…
hsa05217:Basal cell carcinoma	13	0.00894265	FZD9, WNT5A, WNT10A, TCF7, FZD1, FZD5, GLI3, TCF7L1, FZD7, WNT2, WNT9A, WNT6, WNT7A
GO:0005929~cilium	26	0.0089476	PKHD1, GPR161, ADCY5, TTLL4, DNAH7, GLI3, TTLL3, IFT122, TTC30B, WDR35, ADCY10, TTC21A, MYOC, NPHP1, KIF3A, TTC21B, DCDC2, AHI1, BBS12, ARL6, CFAP45, TULP1, EVC2, TULP4, DLD, NEK4
GO:0005109~frizzled binding	10	0.00957575	WNT5A, WNT2, WNT10A, RYK, FZD1, WNT9A, WNT6, WNT7A, FZD7, MYOC
GO:0006468~protein phosphorylation	65	0.00978776	FASTKD1, RNASEL, FASTKD2, CDK18, NRBP1, EIF2A, TGFB2, ADCK2, PAK2, AAK1, TLK1, ROS1, IP6K3, CDK14, IRAK2, SGK1, CAMK1G, STK25, LIMK1, ROCK2, PRKCI, PBK, PRKCE, CDKL2, TBCK, MAP4K4, CAMK4, HIPK1, HIPK2, CAMK1, NEK4, MAP3K13, KALRN, FRK, STK10, NEK1, STK17B, PXK, TRIB2, EPHB6, MAP3K2, MAP3K1, BUB1, ZAP70, CAMK2D, DYRK3, PIK3R4, TEC, FYB, ALPK1, RYK, CSNK2B, TRIO, FNIP2, PLK4, MLK4, PLK2, RSRC1, NTR…
GO:0005912~adherens junction	12	0.0098483	EPHA5, PTPRK, MAGI1, CTNND2, AHI1, DLL1, LIMD1, TNK2, CTNNA1, CTNNA2, ADAM15, NPHP1
GO:0034058~endosomal vesicle fusion	5	0.00988712	RBSN, VPS41, TGFBRAP1, SAMD9L, VPS8
GO:0072372~primary cilium	16	0.0104202	KIF3A, TTC21B, GPR161, PKHD1, ADCY5, DCDC2, AHI1, RABGAP1L, ARL6, GLI3, TRAF3IP1, IFT122, TTC30B, CYS1, WDR35, TNPO1
GO:0050811~GABA receptor binding	6	0.0106981	PLCL2, GABRG1, PLCL1, GABRB1, TRAK1, JAKMIP1
GO:0016601~Rac protein signal transduction	7	0.0108022	ALS2, NISCH, AIF1, HACE1, ELMO1, NCKAP1, FARP2
GO:0016020~membrane	254	0.0109363	ALS2, ADCY2, DNAJB14, NAA15, VPS52, INTS1, STRN, CD48, CLPTM1L, ATP2B4, DDX18, AGPS, RAB24, ERAP1, RAPGEF2, ROS1, PTPRK, MAGI3, UNC5CL, OLA1, VPS41, PCM1, NKTR, DCTN1, TMEM131, MGAT1, CRHR2, CD36, CEP350, F5, PARP14, ACAP2, TGFBRAP1, FBXL2, ACAA1, ORAI2, GGCX, CLCN1, KIAA1109, IL1R1, DAG1, SFXN1, PRRC2A, PRRC2C, RIMS1, KCNMB2, CALU, SEMA5A, HLA-DRB5, NPHP1, HIP1, MGAT4A, OSBPL3, DDX1, EPRS, EN2, …
GO:0030833~regulation of actin filament polymerization	6	0.0112792	PFN2, PPP1R9A, HAX1, ARHGAP18, FCHSD1, RASA1
GO:0005515~protein binding	957	0.0117898	MEF2C, VPS54, CRHBP, VPS52, MED23, RADIL, REST, AGTR1, SH3YL1, MAP3K4, CUL7, SERPINE2, CUL9, SERPINE1, YEATS2, DHX36, DHX30, ROS1, CUL1, CCAR2, STAG1, LIFR, VPS41, ISG20L2, MECOM, PROX1, F5, ACAA1, ORAI2, ADSS, KIAA1109, CHCHD2, FAM212A, PRRC1, DUSP19, PFN2, IL17F, GOLPH3L, ZAP70, ZNF124, DHX57, FH, KIF3A, ESRRG, TMEM110, SFMBT1, FNIP2, EMILIN1, TMEM115, PKP1, SMURF1, TAF1B, LXN, EZH2, TP63, EIF2…
hsa05330:Allograft rejection	10	0.012412	CD86, IL5, IL12A, HLA-DRB5, HLA-B, HLA-DMB, IL10, HLA-G, HLA-F, CD28
GO:0006954~inflammatory response	55	0.0127268	ABCF1, RARRES2, PTGS2, NDST1, LXN, AIF1, CRHBP, TACR1, F2RL1, TLR1, IL19, NFKB1, CXCR2, ADORA1, IL10, CXCL10, MYD88, NOD1, TNIP2, TNIP1, IRAK2, HYAL1, NFKBIZ, ACKR1, CHST2, IFI16, GPER1, NLRP3, PROK2, TNFAIP6, TNFRSF10C, CAMK4, CCR5, NFE2L2, TMED7-TICAM2, IL36A, NMI, CXCL9, TAC1, PXK, HRH1, ITGB6, IL17F, ZAP70, SCN9A, NRROS, CSF1R, LY75, HAVCR2, SELP, IL5, IL1RL2, HDAC4, STAB1, CD14
GO:0033268~node of Ranvier	6	0.0131361	SCN1A, NFASC, DAG1, SPOCK1, MYOC, DLG1
GO:0005605~basal lamina	6	0.0131361	LAMA2, LAMA4, LAMB2, COLQ, NID1, DLG1
GO:0004653~polypeptide N-acetylgalactosaminyltransferase activity	7	0.0132761	GALNT3, GALNT2, GALNT10, WBSCR17, GALNTL6, GALNT13, GALNT14
GO:0004714~transmembrane receptor protein tyrosine kinase activity	10	0.0137381	DDR1, RYK, FLT4, NTRK1, TRIM27, MERTK, DDR2, ROS1, CSF1R, KDR
GO:0061072~iris morphogenesis	5	0.0151243	WNT2, HIPK1, HIPK2, WNT9A, PITX2
GO:0001974~blood vessel remodeling	9	0.0153212	MEF2C, BAK1, HOXA3, AGT, FGF10, SEMA3C, NOS3, RBPJ, TGFB2
GO:0042220~response to cocaine	9	0.0153212	DNMT3A, HDAC2, SLC6A1, HNMT, CNR1, CHRNB2, DPYSL2, HSPD1, ADGRL3
GO:0007093~mitotic cell cycle checkpoint	9	0.0153212	MAD1L1, PLK2, PRCC, BUB1, TTK, INTS3, WNT9A, RAD17, DLG1
GO:0018024~histone-lysine N-methyltransferase activity	10	0.0162606	KMT2E, SETDB1, EZH2, SETMAR, SMYD3, SETD7, WHSC1, MECOM, EHMT2, NSD1
GO:0014068~positive regulation of phosphatidylinositol 3-kinase signaling	14	0.0162894	SELP, PPARD, HAX1, PDGFA, F2RL1, GPER1, KDR, TGFB2, LEP, AGT, PDGFC, NRG1, MYOC, CD28
GO:0030544~Hsp70 protein binding	9	0.0171579	BAG6, METTL21A, GPR37, PPEF2, PACRG, DNAJC10, IQCG, DNAJB2, PARK2
GO:0001726~ruffle	17	0.0173222	ALS2, COBL, MYO6, ARHGEF26, PDLIM7, FSCN1, VIL1, CYTH3, PALLD, CD2AP, KLHL2, MTMR14, MYO10, SH2B2, FGD5, ARAP3, RASA1
hsa04512:ECM-receptor interaction	17	0.0178463	ITGA1, DAG1, ITGA10, COL5A2, HMMR, LAMA2, CD47, LAMB4, GP5, LAMA4, LAMB2, CD36, ITGB8, ITGB6, TNN, SV2A, THBS2
GO:0030097~hemopoiesis	13	0.0180874	NOTCH2, ZFP36L2, TTC7A, NOTCH4, TIPARP, DLL1, IFI16, CD164, RUNX2, IL10, CSF1R, TGFB2, CDK13
GO:0009437~carnitine metabolic process	4	0.0181034	SLC22A4, SLC22A5, CROT, POR
GO:0061000~negative regulation of dendritic spine development	4	0.0181034	HDAC2, PLK2, SRGAP2C, FSTL4
GO:0048194~Golgi vesicle budding	4	0.0181034	GOLPH3, GOLPH3L, PRKCI, ATP8A1
GO:0008237~metallopeptidase activity	16	0.0183665	ADAM28, STAMBP, AMZ1, BMP1, ADAMTS19, KEL, ENPEP, LNPEP, PSMD14, ADAMTS9, LVRN, ADAM18, ADAM30, RNPEP, ADAM15, ADAMTS4
GO:0051087~chaperone binding	16	0.0183665	DNAJC10, PARK2, HLA-B, OGDH, FNIP2, GET4, DNAJB8, TSACC, BAG4, BAK1, PACRG, BAG2, TBCC, DNAJB2, HSPD1, DNAJB6
GO:0071526~semaphorin-plexin signaling pathway	9	0.018412	SEMA5A, SEMA6A, SEMA3G, PLXNA2, SEMA3F, SEMA3E, SEMA3D, SEMA3C, FARP2
GO:0010634~positive regulation of epithelial cell migration	9	0.018412	HYAL1, RREB1, VIL1, TAC1, FGF10, CLASP1, RAB25, PRKCE, TGFB2
GO:0042102~positive regulation of T cell proliferation	13	0.0205162	HAVCR2, LEP, NCK2, CARD11, ZP3, AIF1, CD46, ZP4, BTNL2, IL12A, HLA-DMB, CD28, CD1D
hsa05412:Arrhythmogenic right ventricular cardiomyopathy (ARVC)	14	0.0205409	ACTB, CACNA2D1, TCF7, ITGA1, LMNA, DAG1, ITGA10, CTNNA1, CACNA2D3, CACNA2D2, TCF7L1, CTNNA2, ITGB8, ITGB6
GO:0008066~glutamate receptor activity	5	0.0209053	GRM3, GRM2, GRM8, GRM7, GRM6
GO:0005102~receptor binding	50	0.0209318	SRI, ACOX2, FRK, DMTN, CADM3, RARRES2, HFE2, CADM2, SSFA2, SNX17, F2RL1, CYTL1, TAC1, AKAP9, CNPY4, GDNF, CXCL10, TGFB2, PECR, SERPINE2, ITGB8, GSTK1, SERPINE1, ZAP70, GNPAT, IDH1, RCHY1, NRG1, RASA1, GBA, TEC, FYB, PLAT, ECI2, CSNK2B, FZD1, CNPY3, ITGA1, MSTN, HLA-B, HLA-G, PLG, HLA-F, LAMA2, CD86, LAMA4, TENM2, IGFBP1, WNT7A, CROT
GO:0010763~positive regulation of fibroblast migration	5	0.0218218	DMTN, BAG4, SLC8A1, PRKCE, DDR2
hsa04080:Neuroactive ligand-receptor interaction	41	0.0222706	ADORA3, GLRA1, GABRB1, TACR1, F2RL1, GABBR1, PRSS1, ADORA1, SCTR, EDNRA, AGTR1, HRH1, CHRNA9, HRH2, CNR1, ADRA2C, ADRA2B, PRL, HTR5A, CHRNA2, GABRG1, RXFP4, PTGER4, NPY1R, NTSR2, PLG, LEP, CRHR2, GRM3, GPR35, GABRR1, GRM2, CHRM3, CHRM2, GRM8, GRM7, GRM6, AVPR1B, CHRNB2, GHSR, NMBR
GO:0006886~intracellular protein transport	36	0.0225884	COPA, RAB3GAP2, SEC24B, CLTB, SEC24A, TBC1D8, MLPH, STAM2, SNX17, SNX2, RABGAP1L, RIMS1, EIF2D, COPB2, TBC1D14, BCAP29, TBC1D5, TLK1, STX11, TBC1D1, TNPO1, TBC1D9B, RAMP3, RANBP17, STX1A, ARHGEF2, MYO6, ZP3, IPO11, VPS41, AP4M1, TBCK, COPG2, TGFBRAP1, SYTL3, SNX13
GO:2000352~negative regulation of endothelial cell apoptotic process	8	0.0227581	SEMA5A, SERPINE1, NFE2L2, TNIP2, IL10, TERT, NDNF, KDR
GO:0030175~filopodium	14	0.0240526	EPHA4, PPP1R9A, TIAM2, MYO1B, FAT1, TENM2, VIL1, FSCN1, DAG1, ACTN2, ADGRA2, RAPH1, RUFY3, ACPP
GO:0050661~NADP binding	9	0.0241773	ME1, FMO5, GSR, DHFR, FMO1, FMO3, IDH1, NOS3, POR
GO:0006865~amino acid transport	9	0.0258836	SLC36A1, SLC36A2, SLC17A5, SLC7A2, SLC6A20, SLC3A1, SLC6A18, SLC6A19, SLC7A11
GO:0015301~anion:anion antiporter activity	7	0.0264357	SLC26A3, SLC26A8, SLC22A7, SLC26A9, SLC4A2, SLC26A2, SLC4A5
GO:0030215~semaphorin receptor binding	7	0.0264357	SEMA5A, SEMA6A, SEMA3G, SEMA3F, SEMA3E, SEMA3D, SEMA3C
GO:0001525~angiogenesis	34	0.0269395	NRP2, EMCN, PTGS2, PDGFA, NAA15, FGF10, ESM1, ENPEP, EPHB3, MEIS1, EPHB1, TGFB2, NRCAM, HOXA3, FAP, SERPINE1, ERAP1, HS6ST1, PLCD1, NOS3, EGF, ACKR3, FZD5, ARHGAP24, NCL, EPHA1, UBP1, NDNF, KDR, LEP, PROK2, RBPJ, WNT7A, ADAM15
GO:0006099~tricarboxylic acid cycle	8	0.0273601	SDHA, SUCLG1, DLD, IDH1, OGDH, MDH2, MDH1, FH
GO:0035091~phosphatidylinositol binding	16	0.0274926	SGK1, PIK3C2B, SNX17, SNX2, NCF1B, SNX4, PXK, HS1BP3, ITPR1, TULP4, SH3YL1, NISCH, SNX24, WDR35, SNX13, HIP1
GO:0004672~protein kinase activity	50	0.0275281	STK16, RNASEL, FASTKD1, FASTKD2, CDK18, NRBP1, NEK1, STK17B, PXK, TRIB2, SGK223, EPHB6, STK32B, MAP3K4, ADCK2, PAK2, MAP3K2, AAK1, MAP3K1, BUB1, DYRK3, PIK3R4, CDK14, CDK13, STK25, LIMK1, RYK, GTF2H4, PRKCI, PBK, PRKCE, CDKL2, EPHA1, TBCK, WEE2, MAP4K4, DDR1, EPHA4, EPHA6, HIPK1, CAMK4, MAPK13, RPS6KA2, RIPK1, MAP3K19, HIPK2, CAMK1, TNK2, NEK4, KALRN
hsa04940:Type I diabetes mellitus	10	0.0277335	CD86, IL12A, HLA-DRB5, HSPD1, HLA-B, HLA-DMB, PTPRN, HLA-G, HLA-F, CD28
GO:0005004~GPI-linked ephrin receptor activity	4	0.0282601	EPHA5, EPHA4, EPHA7, NTRK1
GO:0008046~axon guidance receptor activity	4	0.0282601	EPHA7, ROBO1, EPHB3, EPHB1
GO:0036092~phosphatidylinositol-3-phosphate biosynthetic process	11	0.0288561	FGFR3, KLB, PIK3C2B, GAB1, FGF10, INPP4B, INPP4A, FIG4, PIK3R4, FGF2, IRS1
GO:0006734~NADH metabolic process	4	0.0292331	GPD1L, OGDH, MDH2, MDH1
GO:0050671~positive regulation of lymphocyte proliferation	4	0.0292331	MYD88, IL12A, TAC1, FGF10
GO:0090091~positive regulation of extracellular matrix disassembly	4	0.0292331	FSCN1, CLASP1, DDR2, TGFB2
GO:0005789~endoplasmic reticulum membrane	105	0.0297167	RAB3GAP2, CYP3A7, PTGS2, WFS1, RAB3GAP1, DNAJB14, ERMARD, CSPG5, TAPBP, PLOD3, ATF6B, ERAP1, ELOVL6, TOR1AIP2, STIM2, MOGS, POR, PNPLA8, RNF133, COPG2, RASGRF2, SRI, GGCX, ARV1, EXTL3, CERS6, CALU, CERS2, NRROS, PCYT1A, UGT2B28, OSBPL3, OSBPL6, TMEM110, REEP1, REEP2, P4HTM, REEP4, ATF6, NOTCH2, GPR37, NOTCH4, RTN4, LRIT3, CYB5R4, COPA, SEC24B, SEC24A, CLSTN2, ATL2, COPB2, USP19, AGPAT5, POMGNT2, …
GO:0050660~flavin adenine dinucleotide binding	13	0.0299996	ACOX2, XDH, CHDH, POR, KDM1B, SDHA, GSR, FMO5, AGPS, FMO1, DLD, FMO3, NOS3
GO:0043032~positive regulation of macrophage activation	5	0.0300655	HAVCR2, WNT5A, HSPD1, TNIP2, IL10
GO:0070966~nuclear-transcribed mRNA catabolic process, no-go decay	3	0.0307411	CSDE1, PELO, CNOT6
GO:0060715~syncytiotrophoblast cell differentiation involved in labyrinthine layer development	3	0.0307411	CASP8, FZD5, DNAJB6
GO:0031175~neuron projection development	18	0.0307985	MICALL2, PTPRK, RYK, FRYL, GDNF, DTNBP1, UHMK1, EFHD1, PPP1R9A, USP21, PHGDH, MAP4, CNTNAP2, CNTN4, RAB13, RAPGEF2, MYOC, GBA
GO:0005539~glycosaminoglycan binding	6	0.0322969	PODXL2, EGFLAM, SERPINE2, SPOCK3, VCAN, NDNF
hsa00020:Citrate cycle (TCA cycle)	8	0.0325321	SDHA, SUCLG1, DLD, IDH1, OGDH, MDH2, MDH1, FH
GO:2000379~positive regulation of reactive oxygen species metabolic process	8	0.0325548	LEP, XDH, PID1, AGTR1, CD36, AGT, RIPK1, NFE2L2
GO:0021915~neural tube development	8	0.0325548	TCF7, PLXNA2, PLOD3, PHGDH, SEMA3C, FAM212A, PROX1, INTU
GO:0004713~protein tyrosine kinase activity	22	0.0330719	FGFR3, IL5, RYK, NEK1, TTK, DSTYK, FGF10, KDR, EPHA4, EPHA7, EPHA6, BAZ1B, FGFR1OP, ZAP70, DYRK3, TNK2, MST1R, NRG1, MERTK, EGF, FGF2, ROS1
GO:0048013~ephrin receptor signaling pathway	16	0.0333382	ACTB, ANKS1A, ROCK2, EPHB3, EPHA1, EPHB1, EPHA5, NCK2, EPHA4, EPHA7, EPHB6, EPHA6, NTRK1, PSEN2, RASA1, KALRN
GO:0061512~protein localization to cilium	6	0.0338986	TULP4, IFT122, TTC21B, ARL6, WDR35, TTC21A
GO:0033189~response to vitamin A	6	0.0338986	DNMT3A, ARG1, PPARD, GATA4, SLC34A1, PITX2
GO:0001709~cell fate determination	6	0.0338986	NOTCH2, HOXA2, EBF2, NOTCH4, DLL1, PROX1
GO:1902017~regulation of cilium assembly	9	0.035239	TBC1D8, ATG5, TBC1D14, ADAMTS16, TBC1D5, DCDC2, TBC1D19, TBC1D1, TBC1D9B
GO:0008217~regulation of blood pressure	13	0.0364006	LEP, EDNRA, LNPEP, SGK1, NISCH, PTGS2, AGT, LVRN, TAC1, ERAP1, DLL1, NOS3, NPY1R
GO:0015701~bicarbonate transport	10	0.0366149	SLC26A3, CYB5R4, SLC26A8, SLC26A9, SLC4A2, CFTR, SLC4A4, RHAG, SLC26A2, SLC4A5
GO:0043025~neuronal cell body	43	0.0369182	KCNH1, ALS2, COBL, CPLX2, SCN1A, GLRA1, AGFG1, STRN, TAC1, AKAP9, ADORA1, TGFB2, ARG1, BRINP2, DNER, SOS1, PDE1A, CAMK2D, CNTNAP2, SRD5A2, BRINP3, RAPGEF2, ADCY10, HCN3, PTPRK, ARHGEF2, KCND2, KIF3A, TANC1, DPYSL2, PSD2, PTPRN, PPARGC1A, EPHA5, MYO10, EPHA7, EFHC1, PPP1R9A, CHRM2, NTRK1, KCNN2, PSEN2, SMURF1
GO:0006661~phosphatidylinositol biosynthetic process	12	0.0369596	SH3YL1, MTMR14, PIK3C2B, INPP4B, INPP5D, INPP4A, PI4KB, FIG4, CDS1, PIK3R4, FGF2, SACM1L
GO:0017124~SH3 domain binding	20	0.0372579	KHDRBS2, REPS1, LANCL1, PTPN22, PTTG1, PARK2, CD2AP, PTPN12, ELMO1, DOCK4, SH3BP5, ARHGAP31, CBLB, SOS1, MICAL1, INPP5D, SYNGAP1, LRP2, SH3BP2, ADAM15
GO:0008234~cysteine-type peptidase activity	9	0.0381269	CASP6, CTSK, CASP8, USP21, OTUD7B, CTSS, CAPN2, SENP7, SENP6
GO:0030991~intraciliary transport particle A	4	0.0389106	IFT122, TTC21B, WDR35, TTC21A
GO:0060996~dendritic spine development	5	0.0399049	NCK2, PAK2, UBA6, EPHB3, EPHB1
GO:0034453~microtubule anchoring	5	0.0399049	CEP350, FGFR1OP, DAG1, CLASP1, PCM1
GO:0045121~membrane raft	30	0.0408536	ADCY2, ITLN1, TLR1, DAG1, EPHB1, CD48, HPSE, SDPR, CNR1, CASP8, ZAP70, INPP5D, GPC1, DLG1, HYAL2, SLC34A1, ITGA1, DLL1, RFTN2, CAPN2, KDR, ABCB4, CARD11, CBLB, CD36, LAX1, RIPK1, HSPD1, GHSR, CD14
GO:0045202~synapse	27	0.0411329	PPFIA4, GLRA1, CADM2, NRCAM, LAMB2, RGS12, SYN2, EMB, UNC5C, RAPGEF2, HCN3, MAGI2, SDK1, KCNK1, PTPRN, SCGN, TULP1, NCK2, EGFLAM, CHRM3, CHRM2, PIAS3, TENM2, ADGRV1, CYFIP2, SLC5A7, APBB2
GO:0007169~transmembrane receptor protein tyrosine kinase signaling pathway	17	0.0415362	FRK, PTPRG, FLT4, AHI1, CLNK, KDR, IL31RA, DDR1, NTRK1, ZAP70, TNK2, NRG1, ROS1, PILRB, TEC, CSF1R, PILRA
hsa00310:Lysine degradation	11	0.0416651	KMT2E, SETDB1, COLGALT2, PLOD3, SETMAR, SETD7, WHSC1, EHMT2, OGDH, HADH, NSD1
GO:0004726~non-membrane spanning protein tyrosine phosphatase activity	4	0.0417863	PTPN18, PTPN4, ACP1, PTPN12
GO:0048671~negative regulation of collateral sprouting	4	0.0431808	EPHA7, BCL11A, FSTL4, IFRD1
GO:0015824~proline transport	4	0.0431808	SLC36A1, SLC36A2, SLC6A7, SLC6A20
GO:1900246~positive regulation of RIG-I signaling pathway	4	0.0431808	ANKRD17, ZC3HAV1, DDX60, TRIM15
GO:0006108~malate metabolic process	4	0.0431808	ME1, MDH2, MDH1, FH
GO:0061049~cell growth involved in cardiac muscle cell development	4	0.0431808	SORBS2, AGT, GATA4, CAMK2D
GO:0043231~intracellular membrane-bounded organelle	70	0.0443009	ALS2, ACOX2, CCZ1B, MEF2C, CLTB, GLRA1, ANKRD6, GLB1, PECR, ATP2B4, BAG6, P4HA2, PEX1, DNAJC13, AGPS, HPSE, ZFYVE16, CLINT1, PARM1, ACKR3, CTSS, MCM3, MECOM, CTNNA1, IRS1, POR, CD86, SPATA18, TFAP2A, KLHL12, VCAN, UGT2B10, UGT2B15, CLOCK, GRB14, CROT, ACAA1, KMT2E, FRK, AGFG1, STAM2, SNX17, HAT1, AKAP9, PRRC2A, UGT3A2, SEC16B, GSTK1, CNR1, RBSN, FMO3, POU2F1, ENTPD4, RPIA, HIP1, SETDB1, ECI2, DMP…
GO:0007417~central nervous system development	20	0.0447206	ELP3, JARID2, PTPRZ1, BCAN, AHI1, PARK2, PPP1R17, NCKAP1, NRCAM, NPAS2, B3GNT5, RNF103, DNER, PAX8, NHLH2, VCAN, PDGFC, ADAM22, ADGRA2, VNN2
GO:0006493~protein O-linked glycosylation	8	0.044821	GALNT2, GALNT10, POMGNT2, EOGT, TRAK1, B3GALNT2, DAG1, TET2
GO:0051020~GTPase binding	7	0.0462022	PPP1R9A, GNB2, EPRS, SPTBN1, VPS41, PTPRN, RASA1
GO:0030199~collagen fibril organization	9	0.0466433	FMOD, PLOD3, COL12A1, ADAMTS3, LOXL2, DDR2, COL5A2, TGFB2, DPT
GO:0010595~positive regulation of endothelial cell migration	10	0.0471616	NRP2, WNT5A, ROCK2, AGT, FLT4, ADGRA2, WNT7A, FGF2, PROX1, KDR
GO:0071222~cellular response to lipopolysaccharide	19	0.0472993	HAVCR2, WNT5A, MEF2C, PPARD, NFKB1, NLRP3, PPARGC1A, IL10, CMPK2, CXCL10, ARG1, CD86, CD36, CCR5, SERPINE1, IL12A, TNIP2, CD14, TMED7-TICAM2
GO:0043679~axon terminus	10	0.0482169	SRI, EPHA4, TULP1, CHRM3, CHRM2, CRHBP, TANC1, ADRA2C, GPER1, PTPRN
GO:0019432~triglyceride biosynthetic process	7	0.0486938	GPD1L, MOGAT3, AGPAT5, AGMO, AGPAT4, GPAT2, LPIN1
GO:0010629~negative regulation of gene expression	22	0.0489574	HAVCR2, MEF2C, ZNF281, XDH, AIF1, TIPARP, IQGAP3, PTPN22, NFKB1, PARK2, REST, GPER1, TGFB2, MYCN, BAK1, ITGB8, AGT, CD46, ROS1, TERT, GBA, CD28
GO:0030676~Rac guanyl-nucleotide exchange factor activity	5	0.0493569	ALS2, ARHGEF4, ARHGEF2, FARP2, KALRN
GO:0005088~Ras guanyl-nucleotide exchange factor activity	19	0.0493748	FGFR3, IL5, KLB, PDGFA, FGF10, ACTN2, AKAP9, GDNF, IRS1, RASGRF2, RASGRP3, SOS1, CAMK2D, SPTBN1, FRS3, NRG1, EGF, RAPGEF2, FGF2
GO:0048015~phosphatidylinositol-mediated signaling	18	0.0500014	KCNH1, FGFR3, KLB, PDGFA, ZP3, PIK3C2B, FGF10, PI4KB, IRS1, MOV10, CD86, NTRK1, GAB1, NRG1, EGF, FGF2, CSF1R, CD28
GO:0031012~extracellular matrix	40	0.0501759	FRAS1, FMOD, AEBP1, PXDN, RARRES2, LTBP1, SPOCK3, FGF10, EDIL3, ABI3BP, TGFB2, WNT2, COL26A1, LAMB2, SERPINE2, HIST1H4A, SERPINE1, COL12A1, FBN2, LOXL2, THBS2, MYOC, DPT, PLAT, RPL35A, ZP3, LMNA, NID1, FLNB, COL5A2, NDNF, EMILIN1, LAMA2, ADAMTS9, LAMA4, FBLN2, VCAN, HSPD1, ADAMTS3, ADAMTS4
GO:0022011~myelination in peripheral nervous system	5	0.0513552	LAMA2, DAG1, ADAM22, MYOC, ARHGEF10
GO:0030194~positive regulation of blood coagulation	5	0.0513552	DMTN, CD36, HPSE, SERPINE1, NFE2L2
GO:0070498~interleukin-1-mediated signaling pathway	5	0.0513552	EGR1, IRAK2, IL1R1, IL1RL2, TNIP2
GO:0034968~histone lysine methylation	5	0.0513552	SETDB1, SMYD3, SETD7, MECOM, EHMT2
GO:0019229~regulation of vasoconstriction	6	0.0515006	AGTR1, HRH1, AGT, ADRA2C, ADRA2B, KCNMB2
GO:0009813~flavonoid biosynthetic process	6	0.0515006	UGT2B4, UGT2B10, UGT2B15, UGT2B28, UGT3A2, UGT2B7
GO:0002755~MyD88-dependent toll-like receptor signaling pathway	8	0.0519311	IRAK2, CD36, MYD88, MAP3K1, TLR1, HSPD1, TNIP1, CD14
GO:0030036~actin cytoskeleton organization	21	0.0519848	DLC1, DMTN, PDLIM7, LIMK1, PDGFA, ARHGEF5, FSCN1, PALLD, FLNB, DAAM2, ARHGAP26, ELMO1, ARHGEF11, PFN2, NISCH, MAP3K19, PDE4DIP, SH2B2, FGD5, DNAJB6, NPHP1
hsa05414:Dilated cardiomyopathy	15	0.0538445	ACTB, CACNA2D1, ADCY2, ADCY5, DAG1, ITGA1, LMNA, ITGA10, CACNA2D3, CACNA2D2, TPM3, TGFB2, ITGB8, PLN, ITGB6
GO:0032389~MutLalpha complex	4	0.0540807	PMS2, MLH1, WRN, PMS1
GO:0005643~nuclear pore	13	0.0555123	MAD1L1, RANBP17, NUP153, AGFG1, POM121L12, NUP205, NUP210, KPNA5, TNKS, RANBP2, NUPL2, PIK3R4, NUP210L
hsa05166:HTLV-I infection	36	0.055792	WNT5A, IL1R2, IL1R1, ADCY2, PDGFA, ADCY5, NFKB1, PTTG1, TRRAP, HLA-DMB, TGFB2, MSX2, WNT2, MAP3K1, HLA-DRB5, PPP3CA, WNT6, TERT, DLG1, ANAPC1, EGR1, FZD9, WNT10A, KAT2B, ANAPC4, FZD1, CDC23, HLA-B, FZD5, FZD7, HLA-G, HLA-F, ATF3, POLD2, WNT9A, WNT7A
GO:0043515~kinetochore binding	3	0.0558943	CENPE, SPDL1, CLASP1
GO:0001642~group III metabotropic glutamate receptor activity	3	0.0558943	GRM8, GRM7, GRM6
GO:0005930~axoneme	14	0.0565028	KIF3A, RP1L1, DCDC2, ARL6, GLI3, RSPH9, TTLL3, TRAF3IP1, EFHC1, ATG5, MAP4, WDR35, ATG16L1, PIK3R4
GO:0007005~mitochondrion organization	14	0.0567924	EIF4G1, MAN2A1, NRF1, MSTO1, HAX1, CHCHD2, BCS1L, NOS3, PARK2, TFB1M, PPARGC1A, PPARGC1B, TERT, GBA
GO:0018393~internal peptidyl-lysine acetylation	3	0.0572234	BAG6, KAT2B, POR
GO:1903061~positive regulation of protein lipidation	3	0.0572234	RAB3GAP2, RAB3GAP1, GBA
GO:0032386~regulation of intracellular transport	3	0.0572234	WWC1, REEP1, REEP2
GO:0005005~transmembrane-ephrin receptor activity	4	0.0579539	EPHA5, EPHA4, EPHA1, EPHB1
GO:0071300~cellular response to retinoic acid	13	0.0594626	KMT2E, WNT5A, LEP, WNT2, MEF2C, T, HOXA2, HDAC2, BRINP2, WNT9A, BRINP3, WNT6, FZD7
GO:0005856~cytoskeleton	48	0.0597614	MAEA, MYO7B, DAG1, AKAP9, CCT3, KLHL3, TRIB2, TPM3, FRMD1, PFN2, TRIM67, CASP8, NOS3, INPP5D, FGD5, CYS1, ADCY10, AFAP1, HIP1, NPHP1, TEC, ACTB, PTPN7, TCHH, ARHGEF2, BAIAP2L1, FSCN3, TTC21B, FSCN1, PTPN4, PTPN14, KY, ACTN2, BASP1, DPYSL2, PRKCE, ARHGAP24, RAPH1, ARHGAP26, SLC7A11, FARP2, EPB41L2, EVC2, PLEKHH2, TBCC, OSBPL10, ERC2, ARAP3
GO:0060586~multicellular organismal iron ion homeostasis	4	0.0598277	HYAL2, RHAG, SLC40A1, BTBD9
GO:0048103~somatic stem cell division	4	0.0598277	ZFP36L2, WNT7A, FZD7, TGFB2
GO:0002480~antigen processing and presentation of exogenous peptide antigen via MHC class I, TAP-independent	4	0.0598277	LNPEP, HLA-B, HLA-G, HLA-F
GO:0016021~integral component of membrane	551	0.0603244	PEAR1, SCN3A, INTS1, WDR82, CLPTM1L, AGTR1, ADTRP, TMEM144, FAP, SLC9B2, DHX36, ADAM7, ROS1, HIGD1A, PTPRK, PTPRG, LIFR, PTPRN, TMEM131, ARFGEF3, SLC9C1, MST1R, ASPRV1, ADAMTS4, OR10K2, ORAI2, GGCX, IL1R2, IL1R1, SCN1A, EMCN, KIAA1109, OR2T4, C3ORF18, UBA6, ACP1, PFN2, HLA-DRB5, FAM162A, GPD2, TMEM120A, MGAT4A, CCDC80, MPC1, TMEM110, KCNK1, ACPP, C3ORF20, PCDH18, TMEM115, TLL1, RTN4, KCNH1, LEPRO…
GO:0005694~chromosome	17	0.0612968	SETDB1, GTPBP10, TOPBP1, WHSC1, CENPE, EHMT2, ZFR, RNF212, DDX18, MDC1, INTS7, CDCA2, SETD7, LOXL2, NSD1, CLOCK, STAG1
GO:0016337~single organismal cell-cell adhesion	17	0.0614371	EMCN, LIMS2, PKHD1, CTNND2, CD2AP, CTNNA2, NRCAM, CDH9, COL19A1, PKP1, ROPN1B, ADGRV1, TENM2, FAT1, CYFIP2, DLG1, NPHP1
GO:0038191~neuropilin binding	5	0.0619594	SEMA3G, SEMA3F, SEMA3E, SEMA3D, SEMA3C
GO:0015106~bicarbonate transmembrane transporter activity	5	0.0619594	SLC26A3, SLC26A8, SLC26A9, CFTR, SLC26A2
GO:0004872~receptor activity	31	0.0624747	NRP2, EXTL3, CD244, CADM3, PLXNA1, CADM2, PKHD1, TLR1, F2RL1, SEC63, EIF2D, CD48, EPHB6, ITGB8, CD46, ITGB6, SCARB2, SV2A, RAMP3, LY75, LRRN2, ACKR1, CD1D, NOTCH2, CD86, CHRM3, IGF2R, NOTCH4, MCC, ANTXR1, SLC40A1
GO:0007165~signal transduction	139	0.0632578	DLC1, GABRB1, CRHBP, TLR1, IL19, TRGC2, IQGAP3, RADIL, GDNF, CD2AP, IL17RD, ADORA1, CXCL10, CD48, MYD88, STAC, CASP8AP2, CHRNA9, ATF6B, FRS3, UNC5C, KIF13B, CHRNA2, PTPRK, MAGI3, MAGI2, STK25, UNC5CL, CDKL2, IRS1, TNFAIP6, CAMK4, CAMK1, TGFBRAP1, MST1R, GRB14, KALRN, SRI, CYTL1, CXXC5, SP110, RASAL2, PDE6A, PDE6B, T, TAGAP, EGF, RNF14, CSF1R, NPHP1, RYK, IL1RL2, ATF6, MYO10, CBLB, PKP1, LVRN, GRK…
GO:0031072~heat shock protein binding	9	0.0638812	BAK1, HDAC2, GPR37, LIMK1, PACRG, PARK2, OGDH, ADORA1, DNAJB6
GO:0046037~GMP metabolic process	5	0.0644005	PDE6A, PDE6B, CARD11, MAGI3, DLG1
GO:0034162~toll-like receptor 9 signaling pathway	5	0.0644005	HAVCR2, IRAK2, MYD88, TNIP2, PIK3R4
GO:0001570~vasculogenesis	11	0.0644309	T, PAXIP1, CCM2, CUL7, TIPARP, HEG1, WARS2, ACKR3, RASA1, PITX2, KDR
GO:0042733~embryonic digit morphogenesis	11	0.0644309	WNT5A, TRAF3IP1, LMBR1, IFT122, HDAC2, C5ORF42, GLI3, WNT7A, INTU, IHH, MYCN
GO:0008201~heparin binding	24	0.0664415	NRP2, FMOD, SELP, REG4, SELL, LXN, C6ORF15, FGFRL1, CCDC80, MSTN, FGF10, COL25A1, ABI3BP, NDNF, SLIT2, CXCL10, LPA, SERPINE2, WISP3, SERPINC1, TMEM184A, ADAMTS3, THBS2, FGF2
GO:0000139~Golgi membrane	72	0.0666643	COPA, SEC24B, SEC24A, CLSTN2, NDST1, PDGFA, B3GALT4, CSPG5, IL17RD, TAPBP, SLC35A4, COPB2, GALNTL6, B3GALNT2, CHST13, PDGFC, NOS3, PARM1, HYAL2, CAMK1G, STK25, WBSCR17, PRKCI, CHST2, HLA-B, GPER1, PI4KB, HLA-G, HLA-F, RHBDD2, SCAP, SACM1L, MGAT1, PNPLA8, MAN2A1, COPG2, F5, PSEN2, GRM6, KLHL12, TMED7-TICAM2, GALNT3, GALNT2, CYTH3, SEC16B, ECE2, GALNT10, B3GNT5, GOLPH3L, HLA-DRB5, TNKS, HS6ST1, DOP…
GO:0016050~vesicle organization	7	0.0666671	ALS2, CADPS, ZFYVE16, SNX2, FBXO5, SNX4, CD2AP
GO:0019228~neuronal action potential	7	0.0666671	SCN1A, KCND2, SCN3A, SCN9A, GPER1, SCN10A, KCNMB2
GO:0051056~regulation of small GTPase mediated signal transduction	21	0.0672724	DLC1, ARHGEF4, ARHGEF2, SIPA1L2, TRIO, ARHGAP18, ARHGAP24, ECT2, FAM13B, ARHGAP26, ARHGEF11, ARHGAP31, TAGAP, TIAM2, RASGRF2, SOS1, RHOBTB2, DEPDC1B, ARAP3, KALRN, ARHGAP10
GO:0045893~positive regulation of transcription, DNA-templated	66	0.0674216	MEF2C, PPARD, NAA15, TP63, FGF10, NFKB1, REST, PAX3, ZIC1, GLI3, IL10, IL31RA, MDFIC, PAX8, GATA4, WNT6, ZNF496, FGF2, ZNF281, EGR1, KDM7A, RREB1, ZP3, MLXIPL, MECOM, PPARGC1A, PROX1, MYCN, ARHGEF11, CD86, CAMK4, RFC1, HIPK2, USP21, TFAP2A, CAND2, NEK4, NSD1, CLOCK, KMT2E, WNT5A, SUPT3H, CNBP, POU1F1, NPAS2, MAP3K2, AGT, KDM3A, EGF, RUNX2, RNF14, IL5, VHL, ESRRG, FZD1, MSTN, FZD7, FEZF1, HDAC4, H…
GO:0001658~branching involved in ureteric bud morphogenesis	9	0.0678448	ADAMTS16, NPNT, PAX8, PBX1, WNT6, GLI3, GDNF, FGF2, DLG1
GO:0030673~axolemma	5	0.0700936	KCNH1, CNTNAP2, SPTBN1, NRG1, ADORA1
hsa04390:Hippo signaling pathway	23	0.0700985	ACTB, WNT5A, FZD9, WNT10A, TCF7, PRKCI, WWC1, FZD1, FZD5, CTNNA1, FZD7, TCF7L1, FRMD1, TGFB2, CTNNA2, WNT2, SERPINE1, YWHAQ, LIMD1, WNT9A, WNT6, WNT7A, DLG1
GO:0043234~protein complex	52	0.0701688	MEF2C, ALS2, RAB3GAP2, LTBP1, PTGS2, RAB3GAP1, SNX17, WWC1, SNX2, TP63, HAT1, SNX4, PXK, CD48, ATP2B4, MYD88, HIST1H4A, CAMK2D, EXOG, ACTL6A, RAPGEF2, HIGD1A, DNAJC19, ACTB, HIST1H3J, CCM2, ARHGEF2, MAGI2, WDR6, DDX39B, PRKCI, CFTR, DPYSL2, PARK2, PCM1, ITPR1, SCAP, HDAC4, PEX11B, HDAC2, GNB2, NEB, PLN, NTRK1, PSEN2, YWHAQ, SPTBN1, HIST1H3E, HSPD1, SPATS2L, OGG1, HIST1H3G
hsa05416:Viral myocarditis	11	0.0710438	ACTB, EIF4G1, CD86, CASP8, DAG1, HLA-DRB5, HLA-B, HLA-DMB, HLA-G, HLA-F, CD28
GO:0005858~axonemal dynein complex	4	0.0716203	DNAH1, DNAH7, DNAH8, DNAH6
GO:0015020~glucuronosyltransferase activity	7	0.0732252	CSGALNACT1, UGT2B4, UGT2B10, UGT2B15, UGT2B28, UGT3A2, UGT2B7
GO:0043687~post-translational protein modification	6	0.0735402	MINA, ATG5, ARSI, SUMF1, ARSK, SUMF2
GO:0010842~retina layer formation	6	0.0735402	HIPK1, HIPK2, SDK1, TFAP2A, AHI1, ARL6
GO:0052696~flavonoid glucuronidation	6	0.0735402	UGT2B4, UGT2B10, UGT2B15, UGT2B28, UGT3A2, UGT2B7
GO:0060045~positive regulation of cardiac muscle cell proliferation	6	0.0735402	WNT2, MEF2C, TBX20, RBPJ, NRG1, FGF2
GO:0005788~endoplasmic reticulum lumen	27	0.0739	WNT5A, PTGS2, PDGFA, ARSI, DNAJC10, ARSK, EDEM3, COL26A1, COLGALT2, P4HA2, FMO1, BCHE, EOGT, ERAP1, COL12A1, PDGFC, WNT6, COL10A1, CRTAP, CNPY3, COL25A1, COL5A2, COL19A1, F5, SUMF1, SUMF2, WNT7A
GO:0015629~actin cytoskeleton	30	0.074251	MAD1L1, DMTN, HAX1, PDLIM7, STK17B, DENND2A, IVNS1ABP, CD2AP, MYOT, KLHL2, TMEM63B, TCERG1, SORBS2, NCAPG, FYB, BAIAP2L1, FSCN3, FSCN1, RAI14, TOPBP1, PALLD, CTNNA1, FLNB, CTNNA2, FMN2, PPP1R9A, ANKRD23, NEB, APBB3, KALRN
GO:0004222~metalloendopeptidase activity	18	0.0744109	ADAM28, BMP1, ADAMTS19, ASTL, KEL, ADAMTS16, ADAMTS9, ECE2, FAP, ADAM18, ADAM30, ADAM22, ADAMTS3, LMLN, ADAM7, ADAMTS4, TLL1, ADAM15
GO:0030054~cell junction	57	0.0765522	GLRA1, GABRB1, GABBR1, DSTYK, SYT6, IL31RA, MFF, CHRNA9, UNC5C, DISC1, DLG1, CHRNA2, GABRG1, STX1A, KCND2, MAGI1, ARHGEF5, CDHR2, TANC1, SDK1, BASP1, GPER1, CTNNA1, PTPRN, EPB41L2, EGFLAM, GABRR1, GRM2, CHRM3, COLQ, CGN, CHRM2, STXBP5, ERC2, AFAP1L1, RIMS1, DTNBP1, RGS12, C4ORF19, SYN2, EMB, HAVCR2, FYB, DLGAP2, HOMER1, KCNK1, S100A14, RUFY3, KDR, CADPS, TULP1, EPHA4, PPP1R9A, SLC17A5, TENM2, CYF…
GO:0000049~tRNA binding	10	0.0767486	TRNT1, RPL35A, XPO5, THG1L, EIF2A, THUMPD3, EEFSEC, NSUN2, AARS2, TERT
GO:0042113~B cell activation	7	0.0769211	HDAC4, CD86, LAX1, CASP8, ZAP70, CHRNB2, HSPD1
GO:0051453~regulation of intracellular pH	8	0.0773044	SLC26A3, SLC26A8, SLC26A9, SLC9C1, SLC4A2, SLC4A4, SLC26A2, SLC4A5
GO:0031514~motile cilium	13	0.0776958	IFT122, HAVCR1, CATSPER3, ROPN1B, SLC9C1, IQCG, DNAAF5, TSSK1B, ADCY10, INTU, RSPH9, SPAG17, NPHP1
GO:0060041~retina development in camera-type eye	11	0.0782445	PDE6B, TULP1, CLCN2, LAMB2, GRM6, RP1L1, DLL1, MERTK, SLC4A5, NPHP1, RHO
GO:0035721~intraciliary retrograde transport	4	0.0789863	IFT122, TTC21B, WDR35, TTC21A
GO:0008272~sulfate transport	4	0.0789863	SLC26A8, SLC13A1, SLC13A4, SLC26A2
GO:0048240~sperm capacitation	5	0.0789974	SLC26A3, SLC26A8, CATSPER3, DLD, CFTR
hsa01200:Carbon metabolism	18	0.0811339	ME1, SUCLG1, HK2, PGAM2, TKTL2, OGDH, SDHA, GCK, HK3, PKLR, DLD, PHGDH, IDH1, RPIA, PRPS1L1, MDH2, MDH1, FH
GO:0045471~response to ethanol	17	0.0814195	SETDB1, TBXAS1, ADH6, MSTN, ADH7, EHMT2, LEP, BAK1, PSMD14, OXCT1, NTRK1, CNR1, CASP8, SETD7, CHRNB2, OGG1, CD14
GO:0032481~positive regulation of type I interferon production	10	0.0817159	MYD88, ZC3HAV1, PTPN22, NFKB1, POLR1C, DHX36, IFI16, TRIM15, DDX41, CD14
GO:0007275~multicellular organism development	66	0.0817195	PDLIM7, PLXNA1, GPR161, ERMARD, EDIL3, RADIL, SPRY4, KDM1B, WNT2, HLX, PAX8, PIWIL2, WNT6, CDK13, IHH, WNT10A, RREB1, CHST2, DIEXF, DLL1, MORC1, CD164, ZFR, BOLL, ZNF3, FMN2, EYA4, ADAMTS9, HIST1H1T, TNFRSF10C, SLC26A8, CATSPER3, GTF2IRD1, HHAT, SLC9C1, VCAN, ADAM18, WNT9A, WNT5A, AGFG1, FIGLA, TRIML1, IGSF10, HOXA3, HOXA4, DGKD, SHISA3, LIMD1, THPO, CSF1R, FZD9, BMP1, DDX1, CENPE, EN2, QRICH1, N…
GO:0030315~T-tubule	8	0.0826567	SRI, SLC8A1, SCN1A, DYSF, ATP2B4, STAC, KCNN2, CAMK2D
GO:0033263~CORVET complex	3	0.0826876	VPS41, TGFBRAP1, VPS8
GO:0030334~regulation of cell migration	13	0.0837176	RTN4, LAMA2, TBCCD1, SGK1, LAMA4, SERPINE2, PLXNA1, PLXNA2, GAB1, LMNA, HACE1, UNC5C, PITX2
GO:0043021~ribonucleoprotein complex binding	7	0.083874	RNASEL, SMG7, EZH2, WDR12, EEFSEC, UHMK1, PITX2
GO:0008536~Ran GTPase binding	7	0.083874	RANBP17, RANBP9, XPO5, IPO11, IPO9, RANBP2, TNPO1
GO:0051216~cartilage development	11	0.0857874	CSGALNACT1, WNT5A, HYAL1, HYAL2, HOXA3, ITGB8, HOXD3, IL17F, PITX1, COL10A1, IHH
GO:0009617~response to bacterium	6	0.0862027	CD47, BAIAP2L1, VIL1, ERAP1, ADH7, CHIT1
GO:0006607~NLS-bearing protein import into nucleus	6	0.0862027	FYB, CBLB, DAG1, KPNA5, RANBP2, TNPO1
GO:0004396~hexokinase activity	3	0.086845	GCK, HK3, HK2
GO:0008865~fructokinase activity	3	0.086845	GCK, HK3, HK2
GO:0004340~glucokinase activity	3	0.086845	GCK, HK3, HK2
GO:0019158~mannokinase activity	3	0.086845	GCK, HK3, HK2
GO:0051898~negative regulation of protein kinase B signaling	8	0.0871196	XDH, HYAL2, MAGI2, PKHD1, DAG1, MSTN, GPER1, DLG1
GO:0051017~actin filament bundle assembly	7	0.0880127	DMTN, AIF1, MYO1B, BAIAP2L1, FSCN3, FSCN1, PLS1
GO:0090004~positive regulation of establishment of protein localization to plasma membrane	7	0.0880127	RAMP3, VIL1, PLS1, PRKCI, GPER1, AGR2, DLG1
GO:0002474~antigen processing and presentation of peptide antigen via MHC class I	7	0.0880127	SEC24B, SEC24A, ERAP1, HLA-B, HLA-G, TAPBP, HLA-F
GO:0010452~histone H3-K36 methylation	3	0.0888294	SETMAR, WHSC1, NSD1
GO:0061038~uterus morphogenesis	3	0.0888294	NIPBL, WNT7A, KDM5B
GO:0045838~positive regulation of membrane potential	3	0.0888294	PIAS3, SLC34A1, GLRX
GO:0014834~skeletal muscle satellite cell maintenance involved in skeletal muscle regeneration	3	0.0888294	EZH2, WNT7A, FZD7
GO:0021631~optic nerve morphogenesis	3	0.0888294	CHRNB2, GLI3, EPHB1
GO:0071225~cellular response to muramyl dipeptide	3	0.0888294	ARHGEF2, NOD1, PTPN22
GO:1904938~planar cell polarity pathway involved in axon guidance	3	0.0888294	WNT5A, RYK, CELSR3
GO:0003289~atrial septum primum morphogenesis	3	0.0888294	GATA4, WHSC1, TGFB2
GO:0032962~positive regulation of inositol trisphosphate biosynthetic process	3	0.0888294	HRH1, GPER1, POU1F1
GO:0048471~perinuclear region of cytoplasm	74	0.0888347	KCNH1, CYB5R4, DMTN, SEC24B, HRNR, NRBP1, SEC24A, MLPH, AIF1, VPS54, WWC1, VPS52, PTPN22, COPS8, CD2AP, GLB1, LNPEP, MAP3K4, CUL7, PAK2, ADCY10, RAPGEF2, ROS1, CLINT1, DISC1, DLG1, HYAL2, MYO6, MAGI2, ZP3, SLC34A1, ACKR3, GPER1, PI4KB, MCM3, PRKCE, RHBDD2, FMN2, PNPLA8, MTMR14, GNB2, IGF2R, FGFR1OP, PSEN2, VAMP5, TMEM184A, KCNH2, STK16, GALNT3, COBL, GALNT2, PKHD1, RASGRP3, SORBS2, FAT1, CAMK2D, …
hsa00524:Butirosin and neomycin biosynthesis	3	0.0889605	GCK, HK3, HK2
GO:0030139~endocytic vesicle	10	0.0894993	HYAL2, DYSF, MYO6, IGF2R, PIK3C2B, RAB13, RAPGEF2, LRP2, CD2AP, EHD3
hsa05320:Autoimmune thyroid disease	10	0.0900679	CD86, IL5, HLA-DRB5, TPO, HLA-B, HLA-DMB, IL10, HLA-G, HLA-F, CD28
GO:0097038~perinuclear endoplasmic reticulum	4	0.091336	OSBPL3, OSBPL6, SYT6, CAPN2
hsa04146:Peroxisome	14	0.0917027	ACOX2, XDH, PEX11B, PECR, ECI2, ACSL1, AGPS, PEX1, GSTK1, GNPAT, IDH1, ACSL6, CROT, ACAA1
GO:0001755~neural crest cell migration	9	0.0941249	SEMA5A, SEMA6A, SEMA3G, SEMA3F, SEMA3E, SEMA3D, GBX2, SEMA3C, GDNF
GO:0002076~osteoblast development	5	0.0950791	MSX2, HDAC4, HOXA2, LIMD1, RUNX2
GO:0001508~action potential	5	0.0950791	SRI, KCND2, GLRA1, CHRNB2, KCNMB2
GO:0031090~organelle membrane	14	0.0963426	CYP2U1, FMO5, MAP1LC3C, CYP3A7, PTGS2, FMO1, FMO3, SLC39A8, UGT2B4, SRD5A2, UGT2B10, UGT2B15, UGT2B28, UGT2B7
GO:0043394~proteoglycan binding	4	0.0974696	CTSK, NID1, CTSS, SLIT2
GO:0003993~acid phosphatase activity	4	0.0974696	PPIP5K2, PXYLP1, ACP1, ACPP
GO:0008271~secondary active sulfate transmembrane transporter activity	4	0.0974696	SLC26A3, SLC26A8, SLC26A9, SLC26A2
GO:0019531~oxalate transmembrane transporter activity	4	0.0974696	SLC26A3, SLC26A8, SLC26A9, SLC26A2
GO:0015116~sulfate transmembrane transporter activity	4	0.0974696	SLC26A3, SLC26A8, SLC26A9, SLC26A2
GO:0005604~basement membrane	13	0.0975696	FRAS1, LAD1, NPNT, DAG1, CCDC80, NID1, LAMA2, LAMB4, LAMA4, LAMB2, EGFLAM, LOXL2, THBS2
GO:0034446~substrate adhesion-dependent cell spreading	8	0.0976068	MICALL2, FGFRL1, RADIL, ANTXR1, MERTK, EPHB3, EPHA1, FZD7
GO:0022617~extracellular matrix disassembly	13	0.097867	CTSK, BMP1, EXOC8, PRSS1, BCAN, NID1, CTSS, FBN2, CAPN2, PLG, ADAMTS4, TLL1, ADAM15
GO:0005911~cell-cell junction	24	0.0982372	MICALL2, PTPRK, MAGI3, CADM3, MAGI1, PDLIM7, THEMIS, FSCN1, IQGAP3, AHI1, CTNNA1, ECT2, PCDH1, FAT1, TENM2, ZAP70, HEG1, LIMD1, SV2A, RAPGEF2, ADGRL3, NPHP1, RHO, DLG1
GO:0051897~positive regulation of protein kinase B signaling	14	0.098802	HAX1, ZP3, PDGFA, SEMA5A, LEP, BAG4, HPSE, MST1R, NRG1, FGF2, MYOC, HIP1, CD28, THPO
GO:0032456~endocytic recycling	6	0.099924	MICALL2, VPS52, SNX4, RAB13, EHD3, DENND1B
GO:0045880~positive regulation of smoothened signaling pathway	6	0.099924	DCDC2, WNT9A, CTNNA1, INTU, POR, IHH
GO:0046676~negative regulation of insulin secretion	7	0.0999274	PPP3CA, PARK2, REST, GHSR, HADH, IRS1, STXBP5L
GO:0071392~cellular response to estradiol stimulus	7	0.0999274	RAMP3, MSX2, DDX18, CRHBP, GPER1, PPARGC1A, IL10
GO:0005829~cytosol	443	1.84887e-09	LDHB, A2M, VPS53, CUL5, MAT1A, PPP1R1B, RPLP0, INCENP, RPLP1, ILK, ZNF106, CDCA5, CDCA3, SYK, MYLK3, NCAPD2, JUP, PTRF, TRAPPC9, ZWINT, PIDD1, UNC13B, ARHGEF25, CNTRL, DAAM1, RIC1, ARIH1, CDC42EP2, DUSP16, EFR3A, KBTBD7, PPP2R2D, GIT1, DVL2, TAOK1, ACACA, C16ORF89, ACACB, UPF3A, TNK1, NUTF2, PLCZ1, RASSF9, HSF1, NUBP1, COPB1, EEF2K, SPG21, DHTKD1, PIK3C2G, AIFM2, LYN, PIK3C2A, PHKG2, ARHGEF17, AR…
GO:0005515~protein binding	1018	0.000101409	RBPMS2, LDHB, VPS53, RORA, GRIN3A, EPC1, ZNF778, CUL5, USP54, DHX38, INCENP, MAP3K9, RPLP0, ILK, RPLP1, DHX32, CDH23, CCAR1, SERPING1, EXD2, ARPIN, F7, TOX3, NCAPD2, JUP, PTRF, SERPINF1, ZWINT, FOXG1, F2, ZNF785, ROR2, PIDD1, CHORDC1, UNC13B, OSTF1, CACNB2, CNTRL, RIC1, SCRIB, ORAI3, ARIH1, DUSP13, DUSP14, KBTBD6, KBTBD7, AHNAK2, NTHL1, RECQL4, DHX8, ESRRA, ZC3H18, ARHGEF39, TAOK1, TAOK3, ACACA, …
GO:0016020~membrane	279	0.000193478	LDHB, ADCY4, DYNC1LI2, GBGT1, ADCY6, STOML1, STOML2, VPS53, GRIN3A, ANKLE2, AQP2, ATP2B1, INTS5, DHX38, CLK3, WWP2, RPLP0, WNK4, SEMA7A, ILK, CEP290, ZNF106, GNG2, CDH23, RECK, EFNB2, KRT10, ERGIC2, NCAPD2, PITPNM1, CD163L1, LAMC3, UBR5, ATP5C1, YME1L1, AMFR, UNC13B, MYO18A, GCNT3, ERBB2, ITGA11, AKAP13, CCDC91, CNTRL, RFFL, DAAM1, RIC1, ORAI3, SORCS3, CDC42EP2, GCNT1, RECQL4, GIT1, OSBPL5, ABR, …
GO:0042632~cholesterol homeostasis	18	0.000305709	SOAT2, IL18, SLC37A4, ABCA2, ABCA1, SIRT1, ACSM3, APOA4, G6PC, DGAT2, LCAT, CYP7A1, SCARB1, EHD1, LIPC, AKR1C1, NR1H3, LRP5
GO:0005811~lipid particle	18	0.000317526	AIFM2, CKAP4, ABHD4, ALDH3B2, SIGMAR1, LPCAT2, STARD13, ATG2B, PITPNM1, TRAP1, ALOX15, PLIN2, DGAT2, ATG2A, RAP1B, EHD1, TRAF6, GAPDH
GO:0005737~cytoplasm	607	0.00046938	RBPMS2, LDHB, KIAA0556, PTGS1, NAA16, DHX38, DHX37, PPP1R1B, RPLP0, ILK, RPLP1, ARHGEF40, DHX33, SDR9C7, CDCA5, GOLGA8A, DHX32, SYK, PDPR, MPDZ, MYLK3, PTPRR, ZHX2, EXD2, DCDC1, ERGIC2, NCAPD2, JUP, PITPNM1, PTRF, SSTR1, SPAG5, SIPA1L1, ZWINT, FLII, PIDD1, UNC13C, UNC13B, DBNDD1, OSTF1, ERBB2, CNTRL, DAAM1, SCRIB, ARIH1, CDC42EP2, DUSP13, KBTBD4, MYO15A, RCCD1, DUSP16, AHNAK2, ARNTL2, DVL2, GIT1,…
GO:0005882~intermediate filament	25	0.000510763	MYO5A, VIM, PNN, KRT9, KRT80, KRT5, KRT7, KRT40, KRT2, KRT3, KRT86, KRT31, KRT13, KRT10, KRT35, KRT73, JUP, KRT39, KRT36, KRT18, KRT76, KRT16, KRT14, CLIP1, IFFO1
GO:0048008~platelet-derived growth factor receptor signaling pathway	11	0.000577214	PTPRJ, SGPL1, NRP1, PIK3C2A, BCAR1, ARID5B, JAK2, PDGFD, RAPGEF1, IQGAP1, PTPN11
GO:0046777~protein autophosphorylation	34	0.000652908	FGFR2, STK33, ERBB2, PEAK1, CAMKK2, ACVR1B, IRAK3, VRK1, PTK2, CLK3, MAP3K9, TEK, EEF2K, SIK2, SYK, FLT1, MYO3A, LYN, FLT3, TRPM7, MEX3B, TAOK3, MINK1, WNK2, DAPK1, ULK1, ULK2, ULK3, JAK2, TNK1, ABL1, MAP3K12, EIF2AK4, NEK6
GO:0051015~actin filament binding	28	0.000708448	TLN1, TLN2, MYO7A, SLC6A4, CACNB2, TPM2, CORO2A, MYO1A, ADSSL1, ACTN1, CORO6, NEBL, AJUBA, PKNOX2, CORO1B, SYNE2, LASP1, ARPC5L, SVIL, CFL1, MYO16, MYH11, GAS2L2, USH1C, CYFIP1, ABL1, MYO18A, MYH10
GO:0070062~extracellular exosome	340	0.00117071	LDHB, A2M, LTBP3, CHMP5, PTGS1, NAA16, BBOX1, AQP2, KIFC3, ATP2B1, GOT1, WWP2, WWP1, LCAT, RPLP0, RPLP1, GNG2, ITFG1, MVB12B, PTPRJ, DAB2IP, POLG, NUDT14, ABCC11, KRT13, KRT10, CDHR5, SERPING1, PTPRO, SCEL, JUP, KRT18, SERPINF1, RHCG, KRT16, TXNDC8, KRT14, ST14, F2, ATP5C1, ABAT, OSTF1, GCNT3, ACADSB, TALDO1, ALDOC, RIMS2, SERPINH1, ACAT1, SCRIB, FAM65A, SIAE, MYO15A, GALNS, EFR3A, TECTA, PTGR1, …
GO:0005788~endoplasmic reticulum lumen	35	0.00138258	PACS2, GANAB, ADAMTSL1, WNT5B, PDIA3, ADAMTS13, COL2A1, SERPINH1, APOA4, WNT1, COL17A1, P4HA1, COL27A1, P4HA3, CD4, PDGFD, THBS1, DNAJC3, CES2, COL4A2, F10, CES1, FLT3, COL22A1, COL15A1, F7, CERCAM, HSP90B1, COL14A1, TXNDC16, F2, CTSC, LIPC, FKBP10, MBTPS1
hsa01200:Carbon metabolism	25	0.00147781	DLST, ALDH6A1, TALDO1, RPEL1, HKDC1, ALDOC, GLUD1, OGDHL, CS, PFKP, FBP1, HK1, FBP2, PFKM, DLAT, ACAT1, GOT1, SDS, ENO2, ENO3, PSAT1, SUCLA2, GAPDH, PCCA, PC
hsa04810:Regulation of actin cytoskeleton	38	0.00353946	FGFR2, MYL2, SSH1, FGF14, FGF9, SSH3, BCAR1, SSH2, ITGA11, FGF11, BDKRB2, IQGAP1, PTK2, DOCK1, ITGAX, GSN, ITGB7, SOS2, PIK3R5, PDGFD, GIT1, MYLK3, MYLPF, FGF23, ACTN1, ACTN3, VAV2, ARHGEF12, RRAS2, ARPC5L, ITGA8, CFL1, F2, CYFIP1, ITGAD, PIP4K2A, CRK, PIP4K2B
GO:0007040~lysosome organization	11	0.00364542	CLN3, FAM160A2, NAGPA, GNPTAB, CHMP5, BECN1, TPP1, MYO7A, CLVS1, ABCA1, MBTPS1
GO:0036126~sperm flagellum	8	0.00407131	TXNDC8, RNF38, TEKT3, ABHD2, TEKT5, DNAJB13, SAXO1, AK8
GO:0004672~protein kinase activity	56	0.00414624	STK33, MOK, PRKAG1, CSNK2A2, PKN3, CLK3, WNK4, MAP3K9, ILK, EEF2K, MLKL, ANKK1, SYK, CDK1, RET, MYO3A, SGK3, PHKG2, MINK1, WEE1, DAPK1, PRKCQ, MAP4K5, CDKL1, HSPB8, ERN2, BUB1B, ROR2, NEK9, KSR1, EIF2AK4, MAP3K12, NEK6, ERBB3, ERBB2, MAP4K2, CCL8, PRKDC, VRK1, PTK2, TTBK2, TEK, STK38L, DCLK1, TAOK2, TAOK1, TAOK3, NPR2, GUCY2C, GSG2, GUCY2D, PLK1, ULK3, JAK2, ABL1, CDC42BPB
GO:0035264~multicellular organism growth	18	0.00430816	KAT2A, FGFR2, ARID5B, DUOX2, CELA1, PTPN11, G6PC, TNS2, ERCC6, SLC25A25, DHCR7, SPTBN2, RC3H2, APBA2, RARA, PALB2, SLITRK6, APBA1
GO:0016459~myosin complex	13	0.00439489	MYO5A, CGNL1, MYO1A, MYO1C, MYO3A, MYL2, MYO7A, MYO9A, MYO15A, MYH11, MYO16, MYO18A, MYH10
GO:0043025~neuronal cell body	49	0.00448461	MYO5A, PARD3, SLC38A2, NRP1, TGFB3, GRIN3A, RIC3, CALCA, BRINP1, NUMA1, PPP1R1B, KLC1, ILK, INPP5F, RARA, ZPR1, CHRNA3, OLFM1, UBXN1, DAB2IP, RET, TRPM5, CREB3, DENND1A, GDPD5, GAL, SHANK2, PMM2, EIF4B, LAMP1, CYP17A1, SKOR1, PENK, PLXDC1, P2RX3, PI4K2A, LRP6, SPTBN2, RIN1, FBXO31, AMFR, ABL1, APBB1, SEZ6, ZNF385A, HTR2A, BMPR1A, MYH10, CACNA1B
GO:0014070~response to organic cyclic compound	13	0.00471514	KAT2A, CDK1, HNF1B, LYN, MKI67, LUM, FADS1, SLC37A4, TRPA1, ACACB, ACAT1, POLR2A, PLIN2
GO:0010008~endosome membrane	32	0.00516376	AP1G2, CHMP5, TSG101, ERBB2, SLC6A4, VPS53, TLR4, ABCA2, RFFL, TPCN1, SPG21, RHOD, EHD1, ATP6V0D1, TRAF6, OCA2, TCIRG1, TM9SF2, RET, VAC14, CUBN, BECN1, DCSTAMP, LAMP1, ARHGAP32, UBC, ATP6V0A1, VPS28, ANKFY1, VPS26A, GGA2, ATP6V0A2
GO:0005886~plasma membrane	475	0.00518123	KIAA0556, GRIN3A, ILK, GNG2, CDCA5, CDH23, SYK, PTPRJ, OR2S2, PTPRR, ZHX2, CDHR5, F7, PTPRO, JUP, SSTR5, CD163L1, SSTR1, ST14, F2, ROR2, UNC13C, UNC13B, ERBB3, ARHGEF25, ERBB2, CACNB2, DAAM1, SCRIB, SORCS3, CDC42EP2, DAGLA, RCCD1, EFR3A, AHNAK2, SLC28A3, TECTA, DVL2, ARHGEF39, TAOK3, PPFIBP1, ATP11A, GUCY2C, KCNK4, UPF3A, KCNJ5, OR52M1, PENK, PKP3, CDC42BPB, GPR84, TSG101, TRPV3, ASAH2, OR5W2, NU…
GO:0007498~mesoderm development	10	0.00522492	GDF3, IRX3, OVOL1, GDF11, FOXC2, POU4F1, MESDC2, JAK2, PALB2, EXT1
GO:0045667~regulation of osteoblast differentiation	6	0.00585148	FGFR2, PTK2, ESRRA, SMOC1, HEMGN, GLI1
GO:0005200~structural constituent of cytoskeleton	22	0.00613522	TLN1, KRT6B, TLN2, EPB42, VIM, KRT31, TUBGCP2, KRT9, TUBGCP4, FRMD3, TUBGCP3, FRMD6, KRT5, KRT16, KRT14, TUBAL3, TUBA3C, SPTBN2, KRT2, TUBB8, TUBA1C, SPTAN1
GO:0006002~fructose 6-phosphate metabolic process	5	0.00646973	TALDO1, FBP1, PFKP, FBP2, PFKM
GO:0031435~mitogen-activated protein kinase kinase kinase binding	7	0.0065638	TRAF2, DAB2IP, MARVELD3, MAP4K2, MAPK8IP3, MAPK8IP1, TRAF6
GO:0032403~protein complex binding	35	0.0070879	UQCRC2, TRAF2, HNF1B, THRA, ABI1, NFYB, IQGAP1, CALCA, MAX, AP2B1, SIN3A, ERCC6, PRMT5, GIT2, MLKL, ATP6V0D1, GIT1, SREBF1, CIITA, TUB, DAB2IP, KIF11, FLT3, FBN1, PFKP, KCTD5, C8G, ULK1, CYFIP1, RAP1B, KAT6B, VPS28, APBB1, DNM1, HTR2A
GO:0014068~positive regulation of phosphatidylinositol 3-kinase signaling	15	0.00806057	FLT1, BECN1, ERBB3, FLT3, IL18, CBL, PRR5L, SIRT1, PTK2, UNC5B, TEK, F2, JAK2, PDGFD, AGAP2
GO:0030426~growth cone	22	0.00813511	MYO5A, NRP1, CBL, PCDH9, ABI1, GDPD5, SIGMAR1, PTPRO, SHANK2, IQGAP1, IGHMBP2, CTTN, RASGRF1, KLC1, FKBP15, ZPR1, AMFR, ABL1, APBB1, MAP3K12, CALM1, MYH10
GO:0043252~sodium-independent organic anion transport	8	0.00841016	SLCO1B3, SLCO1A2, SLC22A12, SLC22A24, SLC22A8, SLC22A20, SLCO3A1, SLCO5A1
GO:0005925~focal adhesion	57	0.00841225	KIF23, TLN1, NRP1, PDIA3, TLN2, BCAR1, CSPG4, TSPAN9, IQGAP1, CTTN, GSN, RPLP0, PCBP2, RPLP1, ILK, GIT2, RHOG, RSU1, EFNB2, ACTN1, ACTN3, JUP, TNS2, SENP1, PGM5, RRAS2, ARPC5L, CFL1, FLII, PNMA1, TNC, VIM, PEAK1, ITGA11, CDH1, CD9, PTK2, RPL6, TEK, RPL7A, GIT1, FLRT1, FLT1, PPFIBP1, MPRIP, CAPN1, AJUBA, CORO1B, HSP90B1, SYNE2, LASP1, SVIL, ITGA8, CYFIP1, CPNE3, ATP6V0A2, PLAU
GO:0000776~kinetochore	17	0.00856176	CKAP5, KNSTRN, WDR81, NDE1, PHF2, SIN3A, PLK1, SPAG5, INCENP, ZWINT, MTBP, CLIP1, SKA3, BUB1B, NUP37, NUP107, ZWILCH
GO:0007067~mitotic nuclear division	40	0.00937019	HAUS6, ASUN, KNTC1, LRRCC1, CEP164, ANKLE2, VRK1, NUMA1, FBXW5, KLHL9, INCENP, SKA3, NSMCE2, NUP37, E4F1, ZWILCH, CDCA5, PPP2R2D, CDCA3, CDK1, ANAPC2, KIF11, TADA2A, CKAP5, NUP88, ZNF830, CCNF, PAPD5, UBE2I, WEE1, NEDD1, PLK1, BUB1B, NEK9, CLIP1, ANAPC7, SNX33, MIS18BP1, ABL1, NEK6
GO:0043195~terminal bouton	14	0.0102949	CALCA, TBC1D24, POLG, P2RX3, ILK, GRIN1, SLC18A2, STXBP1, SLC18A3, CABP4, UNC13C, VAMP1, UNC13B, CALB2
GO:0004075~biotin carboxylase activity	4	0.0104163	ACACA, ACACB, PCCA, PC
GO:1990254~keratin filament binding	4	0.0104163	VIM, KRT14, FAM83H, SIRT1
GO:2001236~regulation of extrinsic apoptotic signaling pathway	4	0.0104251	MADD, DEPTOR, DBH, ACSL5
GO:0004674~protein serine/threonine kinase activity	56	0.0105737	STK33, MOK, BCKDK, CAMKK2, CSNK2A2, ACVR1B, PSKH1, PKN3, CLK3, WNK4, MAP3K9, ILK, EEF2K, STKLD1, ANKK1, SIK2, ADCK5, TAF1L, SYK, CDK1, TRPM6, SGK3, MYO3A, TRPM7, PHKG2, MINK1, WNK2, DAPK1, PRKCQ, MAP4K5, CDKL1, ERN2, BUB1B, NEK9, MAP3K12, EIF2AK4, NEK6, MAP4K2, PRKDC, IRAK3, VRK1, TTBK2, STK38L, DCLK1, TAOK2, TAOK1, TAOK3, CDC42BPG, RPS6KA4, ULK1, PLK1, ULK2, ULK3, CPNE3, CDC42BPB, BMPR1A
GO:0005654~nucleoplasm	326	0.0105961	RAD51B, KIAA0556, SURF6, STAT5B, RORA, HEMGN, DCPS, INTS8, EPC1, SIN3A, DHX38, INTS5, CLK3, DHX37, INCENP, ILK, GIT2, DHX33, NUP37, RARA, CDCA5, CCAR1, CLNS1A, ANAPC2, VWA5A, RXRA, POLE, ZHX2, RAD9B, RAD9A, PARP10, NCAPD2, PTRF, SPAG5, UBR5, MLLT10, FLII, YME1L1, ANAPC7, PIDD1, MYO18A, NEK6, DEAF1, TICRR, OAS3, CEP164, CCDC91, BOP1, RFFL, SCRIB, VRK1, ACD, DUSP16, NKX2-1, WDHD1, NTHL1, NR1H3, DHX…
GO:0005856~cytoskeleton	54	0.0108225	KIAA0556, MYO7A, STOML2, FRMD3, CTTN, FRMD6, ACTR6, FAM83H, CLNS1A, CEP295, LDB3, PLEKHH1, FARP1, JUP, PLEKHH3, KRT16, FRMD4A, SIPA1L1, AKAP5, RIN1, USH1C, FHOD1, MVP, DNAH9, PARD3, MYL2, PLEK2, SSH1, SSH3, ALDOC, CABP1, SSH2, VIM, ABI1, LLGL1, PTK2, GPHN, MYO15A, TEK, DRC7, TCTN2, TAOK2, EPPK1, EPB42, CKAP4, FRMPD1, CSRP3, DNMBP, TNKS1BP1, UACA, GAS2L2, JAK2, SNX31, CDC42BPB
GO:0045893~positive regulation of transcription, DNA-templated	73	0.0111777	HNF1B, RAI1, GDF6, BTRC, ARNT2, TGFB3, NAA16, FOXO1, RORA, LGR4, CAMKK2, GLI1, EPC1, WNT1, FUBP3, OSR2, ZFP90, ILK, CEP290, RARA, ASPH, RHOG, TAF1L, ATF7IP, CIITA, RET, ZNF287, FGF23, TOPORS, TOX3, HIF1A, EDF1, FOXC2, ROR2, HAS3, USP22, SMARCA2, RNF20, DEAF1, CRLF3, FOXM1, PPM1A, CDH1, EHF, NFYB, WT1, CHD8, NPAS3, INPP5K, PPP3CB, NKX2-1, ARNTL2, ING1, NFATC3, NR1H3, AXIN1, DVL2, CREB3, CREBBP, AT…
GO:0004402~histone acetyltransferase activity	12	0.0111926	KAT2A, ELP4, EPC1, NCOA2, TADA2A, ARRB1, CREBBP, BRCA2, EDF1, KAT6B, GTF3C4, TAF1L
GO:0043235~receptor complex	23	0.0114648	PTPRB, GPR84, RET, NRP1, FLT1, TAOK2, ERBB3, ERBB2, RXRA, TRPV3, PKD2L1, ACVR1B, TNFRSF1A, VDR, NOTCH1, P2RX3, ITGB7, PLXDC1, LRP6, GPR20, NR1H3, VLDLR, LRP5
GO:0008307~structural constituent of muscle	11	0.0116408	MYL2, MYBPC1, MYBPC3, MYH11, MYLPF, ACTN3, ASPH, TPM2, CAPN3, CSRP3, NEBL
hsa04070:Phosphatidylinositol signaling system	20	0.0120941	PLCZ1, IMPA1, PIK3C2G, PIK3C2A, PPIP5K1, DGKH, TMEM55A, MTMR2, PLCE1, INPP5K, CALML3, PI4K2A, DGKZ, PIK3R5, PIP4K2A, IPPK, PLCB2, INPP5A, PIP4K2B, CALM1
GO:0016702~oxidoreductase activity, acting on single donors with incorporation of molecular oxygen, incorporation of two atoms of oxygen	6	0.012309	ALOX15, P4HA1, P4HA3, BCO1, ALOX5, ALOX12
GO:0005769~early endosome	36	0.0130983	MYO5A, HMGB1, STX8, DERL1, NRP1, TSG101, EEA1, ASTN2, APOA4, TRIM3, FAM109A, INPP5F, CD4, RHOD, ATP6V0D1, EHD1, RAPGEF1, MVB12B, GPR107, CLN3, MAGEL2, RET, FAM21C, SGK3, C16ORF62, FAM21A, ATP11A, ARRDC4, RABEP1, LRP6, FKBP15, VPS28, VPS26A, SNX31, ANKFY1, AOC3
GO:0045121~membrane raft	33	0.0137073	LDHB, TRAF2, MAL2, SLC6A2, SLC6A4, HK1, STOML2, ABCA1, SERPINH1, IQGAP1, ATP2B1, STAT6, TNFRSF1A, UNC5B, CRB2, TEK, CD4, PPP2R1B, CLN3, RET, LYN, MYO1C, CBL, BIRC3, FURIN, ARID3C, PTRF, P2RX3, PI4K2A, SULF1, CNTN1, JAK2, RAP1B
GO:0030425~dendrite	49	0.0137867	ADCY4, MAX, BRINP1, TRIM3, RPLP0, RARA, CHRNA3, SAMD4A, NPFF, RET, DAB2IP, TRPM5, MPDZ, MINK1, PCDH8, FARP1, SKOR1, ZWINT, PLXDC1, HTR7, PI4K2A, RIN1, AMFR, GNB3, SLC38A2, OPRK1, MTMR2, NUMA1, GPHN, INPP5F, AGO2, UBXN1, TAOK2, BECN1, GABRA5, GRIN1, DENND1A, CAPRIN1, OR5T2, EIF4B, LAMP1, SARM1, PENK, ADCY9, MAPK8IP3, ZNF385A, BMPR1A, CACNA1B, HTR2A
hsa04142:Lysosome	23	0.0152691	TCIRG1, CLN3, PLA2G15, AP1G2, LGMN, ABCA2, M6PR, CTSW, CTSL, LAMP1, NAGPA, GNPTAB, TPP1, GALNS, SMPD1, GALC, ATP6V0A1, CTSC, ATP6V0D1, CTSH, GGA2, ATP6V0A2, CTSF
GO:0005089~Rho guanyl-nucleotide exchange factor activity	16	0.0156725	ABR, ARHGEF39, ARHGEF25, AKAP13, ARHGEF17, ARHGEF12, VAV2, MCF2L, FARP1, DNMBP, PLEKHG4, PLEKHG3, DOCK1, RASGRF1, SOS2, ARHGEF40
GO:0006094~gluconeogenesis	11	0.0161599	SLC25A11, G6PC, GOT1, SDS, ALDOC, ENO2, FBP1, ENO3, FBP2, GAPDH, PC
GO:0006281~DNA repair	37	0.0178401	RAD51B, ERCC6L2, TICRR, FOXM1, CEP164, KIN, IGHMBP2, SLX4, FANCI, MUS81, FANCC, RECQL4, CDK1, SSRP1, RAD51AP1, PDS5B, TAOK1, NFRKB, EME2, POLE, TAOK3, RAD9B, RAD9A, SIRT1, RAD51, USP28, NABP2, OTUB1, HELB, UBR5, PARPBP, SUPT16H, TDG, ALKBH1, PARP4, ALKBH3, RBM14
GO:0006661~phosphatidylinositol biosynthetic process	13	0.0185371	MTMR2, PIK3C2G, VAC14, IMPA1, TPTE2, INPP5K, PIK3C2A, PI4K2A, INPP5F, PIK3R5, PIK3R6, PIP4K2A, PIP4K2B
GO:0090330~regulation of platelet aggregation	4	0.019195	PRKCQ, LYN, VPS33B, SYK
GO:0042981~regulation of apoptotic process	34	0.019413	GDF3, TRAF2, BCAR1, GDF6, TGFB3, TNFRSF1A, ROBO4, TPT1, NDRG1, ALX4, RBM25, LCMT1, CARD9, SGK3, AIFM2, FLT3, MADD, CREBBP, ACTN1, ACTN3, BIRC3, DAPK1, NME4, SARM1, CARD16, RELT, INHBE, GDF11, JAK2, PPP1R13B, PIDD1, APAF1, FBXO10, LRP5
GO:0005578~proteinaceous extracellular matrix	40	0.0195968	ASPN, ADAMTS17, ADAMTSL1, WNT5B, GLDN, MAMDC2, ADAMTSL2, ADAMTS14, ADAMTS13, ADAMTSL3, LUM, ADAMTS15, MMP26, POSTN, WNT1, COL17A1, CRISPLD2, SMOC1, ACAN, GFOD2, COCH, TECTA, FLRT1, ZP1, ZP2, ADAMTS20, COL22A1, FBN1, COL15A1, OLFML2A, PAPLN, ECM2, SLIT1, MMP12, VWF, COL14A1, ADAMTS8, SOST, LAMC3, SFTPA2
GO:0001756~somitogenesis	10	0.019944	KAT2A, CRB2, MYF5, ROR2, FOXC2, PRKDC, ABI1, PCDH8, PALB2, BMPR1A
GO:0071364~cellular response to epidermal growth factor stimulus	9	0.0207113	DAB2IP, INPP5K, BECN1, ERBB2, STAT5B, ZPR1, PDE8A, IQGAP1, GSTP1
GO:0019838~growth factor binding	8	0.0208141	ACVR1B, A2M, NRP1, FLT1, ERBB3, ERBB2, RHBDF1, TEK
GO:0006468~protein phosphorylation	64	0.021016	MOK, BCKDK, PRKAG1, CAMKK2, CSNK2A2, ACVR1B, PSKH1, CLK3, HSF1, PKN3, WNK4, MAP3K9, ILK, MLKL, STKLD1, RARA, ANKK1, SIK2, ADCK5, TAF1L, SYK, TRPM6, RET, LYN, SGK3, PHKG2, MYLK3, MINK1, WNK2, DAPK1, MAP4K5, CDKL1, ERN2, BUB1B, NEK9, NEK6, EIF2AK4, MAP3K12, ERBB2, MAP4K2, CCL8, AKAP13, CALCA, IRAK3, VRK1, PPP3CB, STK38L, DCLK1, TAOK1, MEX3B, TAOK3, NPR2, GUCY2C, GSG2, GUCY2D, CDC42BPG, RPS6KA4, ULK…
GO:0001725~stress fiber	12	0.0214831	ABLIM1, CORO1B, PTK2, PGM5, MYO1C, ILK, TEK, ACTN1, DAAM1, FHOD1, NEBL, MYH10
GO:0003774~motor activity	14	0.0215401	MYO5A, CGNL1, MYO1A, DNAH9, MYO1C, MYO3A, MYO7A, MYO9A, KLC1, MYO15A, MYO16, MYH11, MYO18A, MYH10
GO:0030904~retromer complex	7	0.0217162	MAGEL2, DENND5A, FAM21C, DENND4C, M6PR, VPS26A, ANKFY1
hsa02010:ABC transporters	11	0.0219283	ABCC9, ABCC11, ABCC1, ABCA2, ABCC2, ABCC12, ABCA1, ABCC8, ABCG4, ABCA3, ABCC6
GO:0031434~mitogen-activated protein kinase kinase binding	6	0.0224057	DAB2IP, TAOK2, ARRB1, MAPK8IP3, MAPK8IP1, KSR1
GO:1900006~positive regulation of dendrite development	6	0.0224322	DAB2IP, CLIP1, ABL1, SEZ6, IQGAP1, VLDLR
GO:0080111~DNA demethylation	6	0.0224322	APOBEC1, FTO, TDG, AICDA, ALKBH1, TET1
GO:0043010~camera-type eye development	10	0.0233586	SLC25A25, RXRA, MYF5, FBN1, RPGRIP1L, FOXC2, VAX1, HSF4, MAB21L1, WT1
GO:0042127~regulation of cell proliferation	30	0.0235122	APOBEC1, ERBB3, FOXM1, TNC, PTGS1, TGFB3, EGLN3, LGR5, STAT6, TNFRSF1A, PTK2, DHCR7, NDRG1, ESRRA, PTGER2, PDS5B, SGK3, CREB3, TOPORS, DBH, CELA1, GUCY2C, SIRT1, JUP, RELT, TNK1, JAK2, ABL1, CHRNA10, PLAU
GO:0005802~trans-Golgi network	23	0.0240709	CLN3, STX8, DENND5A, BECN1, CHAC1, CDH1, CORO7, POSTN, FURIN, M6PR, ATXN2, AP2B1, CHID1, RAB30, TRAPPC9, INPP5K, FAM109A, CLVS1, MYO18A, GGA2, GCNT1, ARAP1, ATP7B
GO:0006096~glycolytic process	9	0.0246124	HKDC1, ALDOC, OGDHL, ENO2, ENO3, HK1, PFKM, DHTKD1, GAPDH
GO:0046329~negative regulation of JNK cascade	7	0.0248783	AMBP, DACT1, MARVELD3, TAOK3, PER1, NCOR1, GPS2
GO:0035371~microtubule plus-end	6	0.025804	MYO5A, CKAP5, SPAG5, CLIP1, KNSTRN, NCKAP5L
GO:0005815~microtubule organizing center	25	0.0267577	HAUS6, TLN1, ERCC6L2, ABCA2, ZNF365, CEP128, TUBGCP4, TUBGCP3, PTK2, PSKH1, KIF12, SPECC1, NEIL1, TUBGCP2, RAD51, TACC2, FRY, AJUBA, CSPP1, BBS2, KRT18, RAB11FIP3, BUB1B, FLII, NEK6
GO:0044255~cellular lipid metabolic process	10	0.0271702	CHD9, SIN3A, NCOA2, FAM135B, RXRA, CREBBP, DECR2, NCOR1, NCOR2, NR1H3
GO:0017124~SH3 domain binding	21	0.0278938	OSTF1, DAB2IP, LYN, DTX1, BCAR1, CBL, DRD4, DENND1A, ARHGAP17, RAD9A, ABI1, SHANK2, FMN1, DOCK1, ARHGAP1, ILK, CNTNAP1, ZNF106, ABL1, ADAM12, RAPGEF1
hsa01230:Biosynthesis of amino acids	15	0.0280924	PYCRL, TALDO1, RPEL1, ALDOC, CS, PFKP, PFKM, GOT1, SDS, MAT1A, ENO2, ENO3, PSAT1, GAPDH, PC
GO:0005813~centrosome	58	0.0281215	KIF23, RITA1, DYNC1LI2, TTLL5, WDR81, KIFC3, DCAF13, NDE1, ACTR1A, CEP290, DYNC1H1, ATP6V0D1, CDK1, CEP295, C2CD3, DYX1C1, KIAA0586, KIAA0753, TMEM67, PSMA1, ANKRD26, RAB11FIP3, ZFYVE26, CNTROB, NEK9, CLIP1, NUP107, HAUS6, RABGAP1, HYLS1, CEP126, LRRCC1, CEP164, ZNF365, CNTRL, NCKAP5L, TUBGCP4, CYLD, TUBGCP3, NUMA1, NDRG1, TBC1D31, TTC12, IKZF4, CKAP5, RPGRIP1L, BRCA2, PIBF1, TUBGCP2, GSG2, TTC19…
GO:0015629~actin cytoskeleton	33	0.0287663	ABLIM1, POU6F1, MYL2, TLN2, BCAR1, PEAK1, KNTC1, STOML2, CDH1, IQGAP1, CORO2A, GSN, PSMB3, RARA, FAM129B, STK38L, MYLK3, ACACA, CORO6, ERAL1, TTC17, MPRIP, DAPK1, DDX58, PKNOX2, JUP, CORO1B, ARHGAP32, SVIL, CFL1, ABL1, CRK, MYH10
GO:0051603~proteolysis involved in cellular protein catabolic process	11	0.0288099	CTSL, PSMA1, PSMA4, PSMB3, LGMN, CTSC, DNAJC3, CTSH, CTSW, CTSF, PSMB11
GO:0030198~extracellular matrix organization	31	0.028866	ADAMTSL2, LUM, TNC, ITGA11, COL2A1, POSTN, CDH1, PTK2, ITGAX, CRISPLD2, POMT1, ITGB7, COL27A1, ACAN, THBS1, LOXL1, GFOD2, RECK, COL4A2, ADAMTS20, MYF5, FBN1, OLFML2A, NID2, ECM2, FURIN, VWF, COL14A1, LAMC3, ITGA8, ITGAD
GO:0048265~response to pain	6	0.02904	CALCA, RET, SLC6A2, TRPA1, DBH, CACNA1B
GO:0030902~hindbrain development	6	0.02904	ALDH1A2, HNF1B, KDM2B, CEP290, NEUROG3, NFIB
GO:0050775~positive regulation of dendrite morphogenesis	6	0.02904	ANAPC2, PTPRD, FBXW8, ILK, CUX2, CAPRIN1
GO:0006672~ceramide metabolic process	6	0.02904	CLN3, SGPL1, PLA2G15, ORMDL3, NSMAF, ASAH2
GO:0050770~regulation of axonogenesis	7	0.0306906	RET, SSH1, SSH3, SIPA1L1, SSH2, GRIN1, SLIT1
GO:0008504~monoamine transmembrane transporter activity	4	0.0309162	SLC6A2, SLC6A4, SLC18A2, SLC18A3
GO:0008432~JUN kinase binding	4	0.0309162	PTK2, MAPK8IP3, MAPK8IP1, GSTP1
GO:0070417~cellular response to cold	4	0.0309408	FOXO1, DNAJC3, SAXO1, EIF2AK4
GO:0008022~protein C-terminus binding	29	0.0318162	USP7, ERBB2, SIPA1, VIM, STIP1, TRIM3, ERCC6, AGO2, PEX12, TOP2A, CIITA, MYO1C, MKI67, BAIAP3, MPDZ, NEIL1, BRCA2, TFCP2, PFKM, SIRT1, RAD51, ATXN2, PHB2, DGKZ, JAK2, ABL1, KSR1, DNM1, CACNA1B
hsa00640:Propanoate metabolism	8	0.0319703	ALDH6A1, LDHB, ACACA, ABAT, ACACB, SUCLA2, ACAT1, PCCA
GO:0045309~protein phosphorylated amino acid binding	3	0.0320104	ARRB1, BTRC, CRK
GO:0034186~apolipoprotein A-I binding	3	0.0320104	LCAT, SCARB1, ABCA1
GO:0090310~negative regulation of methylation-dependent chromatin silencing	3	0.0320289	APOBEC1, AICDA, TET1
GO:0010980~positive regulation of vitamin D 24-hydroxylase activity	3	0.0320289	VDR, CYP27B1, FGF23
GO:0030576~Cajal body organization	3	0.0320289	USPL1, ZPR1, FAM118B
GO:0005604~basement membrane	15	0.0322939	FGF9, TNC, EFEMP2, FBN1, COL2A1, NID2, COL17A1, SERPINF1, FREM2, LAMC3, SMOC1, ACAN, LOXL1, SPN, VWA2
GO:0060271~cilium morphogenesis	23	0.0324622	KIF27, CEP126, RPGRIP1L, UNC119B, KIAA0586, CEP164, ATMIN, CFAP54, TMEM67, BBS2, NOTCH1, TTBK2, GSN, TMEM138, DNAAF1, CFAP20, TEKT3, CEP290, RFX3, TCTN2, ATP6V0D1, EHD1, IFT88
GO:0005640~nuclear outer membrane	7	0.0327576	SYNE2, DHCR7, NUCB2, NUTF2, NAV3, SIGMAR1, GUCY2D
GO:0030855~epithelial cell differentiation	14	0.0336422	FGFR2, CDK1, CES1, ALDOC, EHF, NEUROG3, WT1, HNRNPH3, RHCG, TPP1, KRT14, KRT3, AKR1C1, DMBT1
GO:0019903~protein phosphatase binding	13	0.0337304	KAT2A, TRAF2, PARD3, ERBB2, STAT5B, IQGAP1, CDH5, JUP, STAT6, HSP90B1, HSF4, ANAPC7, MVP
hsa00010:Glycolysis / Gluconeogenesis	14	0.0341143	LDHB, HKDC1, ALDOC, PFKP, FBP1, ALDH3B2, HK1, PFKM, FBP2, DLAT, G6PC, ENO2, ENO3, GAPDH
GO:0005876~spindle microtubule	10	0.0348201	CDK1, NUMA1, KIF11, PLK1, SPAG5, SKA3, PARP4, BIRC3, NCOR1, CALM1
GO:0004386~helicase activity	16	0.0357038	BTAF1, TDRD9, DDX58, EIF4B, CHD9, ERCC6, DHX37, DDX19B, FBXO18, EIF4A1, CHD2, DHX33, DDX10, SMARCA2, DHX32, EP400
hsa04510:Focal adhesion	33	0.0359855	TLN1, MYL2, TLN2, ERBB2, BCAR1, TNC, ITGA11, COL2A1, PTK2, DOCK1, ARHGAP5, ITGB7, COL27A1, SOS2, ILK, PIK3R5, PDGFD, THBS1, RAPGEF1, COL4A2, FLT1, MYLK3, ACTN1, MYLPF, ACTN3, VAV2, BIRC3, VWF, RASGRF1, LAMC3, ITGA8, RAP1B, CRK
GO:0030335~positive regulation of cell migration	29	0.0361157	WNT5B, FERMT3, BCAR1, GLI1, PTK2, SEMA7A, ILK, RHOD, PDGFD, THBS1, FAM83H, CCAR1, RET, F10, FLT1, ARHGEF39, LYN, CREB3, MYO1C, F7, NOTCH1, SYNE2, RRAS2, ROR2, CPNE3, JAK2, CTSH, PLAU, ALOX12
GO:0060384~innervation	6	0.0367559	RET, SULF1, GABRA5, POU4F1, SLITRK6, UNC13B
GO:0006414~translational elongation	6	0.0367559	TUFM, TSFM, RPLP1, EEF2K, EEF1G, EEF1D
GO:0070266~necroptotic process	6	0.0367559	CYLD, DNM1L, PYGL, TRPM7, TLR4, MLKL
GO:0030168~platelet activation	20	0.0369023	GNA14, LYN, ADAMTS13, ACTN1, DGKH, VAV2, PTPN11, CD9, PRKCQ, VWF, ARRB1, F2, DGKZ, GNG2, PIK3R5, GP1BA, PIK3R6, RHOG, SYK, CLEC1B
GO:0007010~cytoskeleton organization	26	0.0370891	ABLIM1, KRT6B, SIPA1, DOCK1, KRT5, TSPAN32, CAMSAP1, TUBA3C, CNTNAP1, TUBA1C, PLD2, EPB42, KRT31, KRT13, AJUBA, PLCE1, LARP4, KRT76, KRT16, SVIL, CFL1, SPTBN2, TUBAL3, PYY, SPTAN1, CDC42BPB
GO:0030170~pyridoxal phosphate binding	12	0.0376508	SGPL1, GOT1, PYGM, SPTLC2, PYGL, SDS, CSAD, ACCS, HDC, PDXDC2P, ABAT, THNSL1
hsa00030:Pentose phosphate pathway	8	0.0381912	TALDO1, RPEL1, ALDOC, FBP1, PFKP, DERA, FBP2, PFKM
GO:0017119~Golgi transport complex	5	0.0387598	COG4, SCFD1, COG6, COG7, GOLGA3
GO:0046330~positive regulation of JNK cascade	13	0.0418837	HMGB1, DAB2IP, CARD9, TAOK2, TAOK1, TAOK3, TIRAP, MAP4K2, MINK1, TLR4, CCR7, TNFRSF19, AXIN1
GO:0005768~endosome	33	0.0421505	HMGB1, STX8, TSG101, RASSF9, ABCA2, CDH1, BDKRB2, ASTN2, TPCN1, FOLR1, CLVS1, RAPGEF1, TM9SF2, MAGEL2, FLT1, FAM21C, BECN1, EXPH5, GIF, DGKH, ARRDC4, M6PR, RAB11FIP2, RAB11FIP3, CLEC18B, RABEP1, SLC26A7, PI4K2A, SMPD1, CLIP1, SNX33, VPS28, VPS26A
GO:0005903~brush border	12	0.0434798	SOAT2, MYO1A, SLC38A2, DNM1L, MYO1C, USH1C, FLII, ACTN1, CDHR5, ACTN3, ANKS4B, MYH10
GO:0005814~centriole	19	0.0439463	CEP295, C2CD3, CCNF, LRRCC1, KIAA0586, CEP164, CEP128, TOPORS, SAXO1, TUBGCP3, MPHOSPH9, NEDD1, TTBK2, NUBP1, CNTROB, CFAP20, CEP290, TOP2A, IFT88
GO:0046580~negative regulation of Ras protein signal transduction	7	0.0448028	RASAL1, DAB2IP, MAPKAP1, FBP1, TNK1, RASA3, RAPGEF1
GO:0006465~signal peptide processing	7	0.0448028	IMMP1L, F10, F2, SPPL2A, F7, PCSK5, FURIN
GO:0004713~protein tyrosine kinase activity	22	0.0450718	FGFR2, RET, FLT1, LYN, FGF9, ERBB3, ERBB2, STAT5B, FGF23, NPR2, CNTRL, WEE1, CAMKK2, PTK2, CLK3, MAP3K9, TEK, FGFR1OP2, JAK2, TNK1, ABL1, SYK
GO:0007257~activation of JUN kinase activity	9	0.0453036	DAB2IP, MAP4K5, ERCC6, MAP3K9, MAP4K2, MAPK8IP3, ERN2, AXIN1, SYK
GO:0004016~adenylate cyclase activity	6	0.0455639	ADCY4, ADCY9, ADCY6, NPR2, GUCY2C, GUCY2D
GO:0051011~microtubule minus-end binding	4	0.0455883	TUBGCP4, TUBGCP3, CEP290, TUBGCP2
GO:0008589~regulation of smoothened signaling pathway	6	0.0456141	FGFR2, C2CD3, CREBBP, RPGRIP1L, RORA, GLI1
GO:0051298~centrosome duplication	6	0.0456141	TUBGCP4, TUBGCP3, NDE1, CKAP5, BRCA2, TUBGCP2
GO:0071305~cellular response to vitamin D	4	0.0456235	ATP2B1, PENK, TNC, FGF23
GO:0015844~monoamine transport	4	0.0456235	SLC6A2, SLC6A4, SLC18A2, SLC18A3
GO:0032927~positive regulation of activin receptor signaling pathway	4	0.0456235	ZC3H3, ACVR1B, FGF9, NODAL
GO:0042753~positive regulation of circadian rhythm	4	0.0456235	BTRC, NKX2-1, RORA, ARNTL2
GO:0045944~positive regulation of transcription from RNA polymerase II promoter	123	0.0456865	AKNA, THRA, IL18, STAT5B, ARNT2, TGFB3, FOXO1, TLR4, RORA, NLRC5, WNT1, EPC1, SIN3A, WWP2, PSIP1, RARA, WWOX, CIITA, DAB2IP, NODAL, RXRA, HIF1A, ARRB1, MLLT10, PYGO1, SMARCA2, FGFR2, HMGB1, GREM1, WT1, VDR, MEIS2, NKX2-1, ARNTL2, TRAF6, NR1H3, SREBF1, IKZF4, ESRRA, CCPG1, RFX4, KLF12, ESRRB, GRIN1, MAML2, CREBBP, GSX1, ATAD2, ARID3B, NEUROG3, NR4A3, TET1, CSRP3, ARID3C, CTR9, DDX58, HDAC5, NOTCH1…
GO:0031410~cytoplasmic vesicle	34	0.0460371	FGFR2, NRP1, ERBB2, ABCA2, EEA1, KLC1, MAPKAP1, MARVELD3, DUSP16, CEP290, TRAF7, MYOF, AXIN1, TBC1D2, DVL2, FLRT1, TAOK2, MYO1C, MPDZ, CORO7, SIGMAR1, ATP2C2, RHCG, ARRB1, NBR1, PI4K2A, LRP6, SCN8A, SNX33, GGNBP2, CLCN7, ARAP1, ATP7B, HTR2A
GO:0019901~protein kinase binding	52	0.0464677	GDF3, PRKAG1, BCAR1, ADCY6, CSPG4, IQGAP1, TRIM5, PARN, HSF1, MAPKAP1, ILK, MLKL, RHOD, DNAJC3, FAM83H, SYK, PTPRJ, DAB2IP, KIF11, STXBP1, PTPRR, RAD9A, JUP, TRAP1, RAB11FIP2, HIF1A, NEK9, MAP3K12, NEK6, MVP, TRAF2, FOXM1, RFFL, TCF7L2, LLGL1, CYLD, VRK1, PTK2, FBXW5, CD4, TRAF6, AXIN1, DVL2, SREBF1, SLC12A4, NR4A3, PLK1, ZBTB4, JAK2, DNM1, HDAC7, CALM1
GO:0007018~microtubule-based movement	15	0.0483875	KIF23, DYNC1LI2, DNAH9, KIF12, KIF11, KIF27, DNHD1, KLC2, DNAH2, KIFC3, AP2B1, KIF7, KLC1, KIF26A, DYNC1H1
GO:0035023~regulation of Rho protein signal transduction	15	0.0483875	ABR, ARHGEF39, ARHGEF25, AKAP13, ARHGEF17, ARHGEF12, VAV2, MCF2L, FARP1, DNMBP, PLEKHG4, PLEKHG3, RASGRF1, SOS2, ARHGEF40
hsa04922:Glucagon signaling pathway	18	0.0494056	LDHB, CREB3, PHKG2, PRKAG1, CREBBP, ACACA, PDE3B, FOXO1, ACACB, SIRT1, G6PC, PYGM, CALML3, PYGL, PPP3CB, SIK2, PLCB2, CALM1
GO:0005795~Golgi stack	8	0.0498442	CLN3, VRK1, RAB30, SULF1, TMBIM4, LPCAT2, MBTPS1, DNMBP
hsa01130:Biosynthesis of antibiotics	33	0.0506044	PYCRL, LDHB, SC5D, TALDO1, ALDOC, OGDHL, HK1, ACAT1, PFAS, GOT1, ENO2, ENO3, SUCLA2, GAPDH, DLST, RPEL1, HKDC1, AK1, CS, PFKP, FBP1, ACLY, UAP1L1, FBP2, PFKM, DLAT, AK7, AK8, NME4, SDS, IDI2, PSAT1, PCCA
GO:0031012~extracellular matrix	41	0.0512481	ASPN, FGFR2, DCD, GANAB, LTBP3, LUM, TNC, VIM, TGFB3, PRKDC, POSTN, COL2A1, ILK, ACAN, PCSK6, DYNC1H1, THBS1, LOXL1, GAPDH, COCH, COL4A2, ZP1, ZP2, ADAMTS20, CKAP4, FBN1, PFKP, COL15A1, CPXM2, NID2, JUP, VWF, HSP90B1, COL14A1, ADAMTS8, SOST, SERPINF1, CDON, CFL1, EIF4A1, CLEC14A
hsa00562:Inositol phosphate metabolism	14	0.0515576	PLCZ1, ALDH6A1, IMPA1, PIK3C2G, PIK3C2A, MTMR2, PLCE1, INPP5K, PI4K2A, PIP4K2A, IPPK, PLCB2, INPP5A, PIP4K2B
GO:0030199~collagen fibril organization	9	0.051848	COL14A1, ADAMTS14, P4HA1, LUM, ACAN, FOXC2, COL2A1, GREM1, SERPINH1
GO:0050885~neuromuscular process controlling balance	10	0.0528361	CLN3, IGDCC3, JPH3, ABR, TPP1, NLGN2, CNTNAP1, NR4A3, ABL1, MYH10
GO:0070328~triglyceride homeostasis	7	0.0531521	APOA4, IL18, ACSM2A, SCARB1, RORA, LIPC, NR1H3
GO:0061621~canonical glycolysis	7	0.0531521	ALDOC, ENO2, PFKP, ENO3, HK1, PFKM, GAPDH
GO:0055114~oxidation-reduction process	77	0.0545687	LDHB, SC5D, PDIA3, NOXRED1, DUOX2, PTGS1, DUOX1, ALDH1L2, BBOX1, GPX2, CRYL1, P4HA1, CYP7A1, P4HA3, ASPH, LOXL1, SDR9C7, WWOX, AKR1C1, GFOD2, OXR1, COX15, RNLS, ALDH6A1, PDPR, SDR39U1, AIFM2, CYP11A1, DECR2, CYP26A1, ALDH3B2, HEPHL1, CYP2E1, VAT1, ALOX15, KDM2B, KDM2A, TXNDC8, TXNRD1, JMJD1C, DEGS2, AOC3, ENOX1, PYCRL, HSD17B1, GLUD1, DHRS4L2, EGLN3, C14ORF169, PIPOX, SESN3, DCT, ALDH1A2, P3H3, C…
GO:0008514~organic anion transmembrane transporter activity	5	0.0548295	SLC22A17, SLCO1B3, SLCO1A2, ABCC11, ABCC2
GO:0034185~apolipoprotein binding	5	0.0548295	LRP6, SCARB1, ABCA1, LIPC, VLDLR
GO:0050982~detection of mechanical stimulus	5	0.0548804	JUP, DENND5A, ANO3, DENND5B, PKD2L1
GO:0007035~vacuolar acidification	5	0.0548804	TCIRG1, DMXL2, ATP6V0A1, ATP6V0D1, ATP6V0A2
GO:0008203~cholesterol metabolic process	13	0.0563919	SREBF1, SOAT2, OSBPL5, CUBN, CYP11A1, RXRA, ABCA1, APOA4, LCAT, LIPC, MBTPS1, VLDLR, LRP5
GO:0016491~oxidoreductase activity	30	0.0568336	SC5D, DHRS4L2, EGLN3, PIPOX, SESN3, DCT, ALDH1A2, AKR1C1, WWOX, GFOD2, OXR1, PDPR, RNLS, PAOX, PTGR1, SDR39U1, AKR1E2, CYP2C9, FADS1, SCD, ALDH3B2, CYP2E1, VAT1, NDOR1, L2HGDH, HSDL2, FOXRED1, ALKBH1, TXNRD1, ENOX1
GO:0004197~cysteine-type endopeptidase activity	12	0.0577466	USP7, CTSL, USP6, PDIA3, USP5, LGMN, USP12, CTSC, CTSH, USP15, CTSW, CTSF
GO:0048471~perinuclear region of cytoplasm	78	0.0578311	PLCZ1, STK33, NELL1, VPS53, TLR4, VPS33B, BDNF, PKN3, ARHGAP1, RARA, ZPR1, CCAR1, SEC23A, LYN, LDB3, PTPRR, M6PR, RAD51, ATP2C2, KRT18, SERPINF1, DGAT2, AKAP6, BUB1B, AMFR, SEZ6, RASD1, MVP, NEURL1, STX8, GSDMA, MAL2, ERBB2, SIPA1, SLC39A12, CABP1, RAB40C, AKAP13, CDH1, ABCA1, ANGEL1, ALDH1A2, CYLD, MEIS2, FBXW8, KCNS2, INPP5K, TRIM68, MT1A, DNAJA1, NDRG1, TRAF6, HCN4, EHD1, GAPDH, APBA1, EHD4, A…
GO:0000922~spindle pole	18	0.0581466	KIF11, CKAP5, KNTC1, CEP128, TOPORS, KNSTRN, TUBGCP2, FRY, TUBGCP4, CSPP1, TUBGCP3, NUMA1, NEDD1, SPAG5, PLK1, DNAAF1, NEK6, CALM1
GO:0033179~proton-transporting V-type ATPase, V0 domain	4	0.0584807	TCIRG1, ATP6V0A1, ATP6V0D1, ATP6V0A2
GO:0048511~rhythmic process	11	0.0589166	CIPC, MAGEL2, SIN3A, BTRC, CREM, DRD4, CREBBP, NKX2-1, PRKDC, TOP2A, ENOX1
GO:0048468~cell development	9	0.0589703	DCT, GDF3, INHBE, GDF6, TRPS1, ARID5B, GDF11, HSF4, TRAF6
GO:0043124~negative regulation of I-kappaB kinase/NF-kappaB signaling	9	0.0589703	DAB2IP, NLRC3, PPM1A, PER1, NLRX1, RORA, ABL1, SIRT1, GSTP1
GO:0032455~nerve growth factor processing	3	0.0595259	PCSK6, PCSK5, FURIN
GO:0072429~response to intra-S DNA damage checkpoint signaling	3	0.0595259	SLX4, FBXO18, MUS81
GO:0034638~phosphatidylcholine catabolic process	3	0.0595259	PLA2G15, ENPP2, LIPC
GO:0033299~secretion of lysosomal enzymes	3	0.0595259	NAGPA, GNPTAB, M6PR
GO:0001826~inner cell mass cell differentiation	3	0.0595259	HNF1B, TET1, CTR9
GO:0010826~negative regulation of centrosome duplication	3	0.0595259	TMEM67, NUBP1, CCNF
GO:0071871~response to epinephrine	3	0.0595259	RNLS, PENK, ABL1
GO:0051437~positive regulation of ubiquitin-protein ligase activity involved in regulation of mitotic cell cycle transition	14	0.0597762	ANAPC2, CDK1, BTRC, PSMB11, PSMA1, PSMC6, PLK1, PSMB3, PSMA4, UBC, BUB1B, PSMD5, ANAPC7, PSMD7
GO:0007155~cell adhesion	61	0.0607734	OPCML, ATP1B2, TLN2, MYBPC1, BCAR1, MYBPC3, POSTN, PNN, KIAA1462, ARHGAP5, CNTNAP1, CNTN5, MPDZ, EFNB2, IGFALS, CDHR5, CERCAM, JUP, AMBP, PGM5, LAMC3, CNTN1, HAS3, ADAM12, AOC3, ROM1, GNE, TNC, ITGA11, DSCAML1, NEO1, CX3CL1, CDH5, ISLR, CD9, LY6D, ITGAX, ITGB7, ACAN, CD4, GP1BA, THBS1, ENTPD1, APBA1, FLRT1, SVEP1, PPFIBP1, COL15A1, NID2, STAB2, VWF, LYVE1, CDH15, TMEM8A, FREM2, ITGA8, CDON, TROAP…
hsa00051:Fructose and mannose metabolism	8	0.061394	HKDC1, ALDOC, FBP1, PFKP, HK1, FBP2, PFKM, PMM2
hsa05152:Tuberculosis	28	0.0614417	IL18, TGFB3, TIRAP, TLR4, EEA1, NFYB, TNFRSF1A, VDR, IFNA1, CYP27B1, ITGAX, CALML3, PPP3CB, ATP6V0D1, TRAF6, SYK, CIITA, TCIRG1, CARD9, CREBBP, ARHGEF12, LAMP1, ATP6V0A1, JAK2, APAF1, KSR1, ATP6V0A2, CALM1
GO:0001656~metanephros development	7	0.0623827	IRX3, OSR2, ITGA8, FBN1, GDF11, FOXC2, CTSH
GO:0055037~recycling endosome	18	0.0624004	MYO5A, USP6, STX8, SGK3, VPS53, ATP11A, EEA1, VPS33B, AQP2, TUBGCP4, RAB11FIP3, TBC1D12, RABEP1, ARHGAP44, PANK1, FAM109A, FCHSD2, INPP5F
GO:0007626~locomotory behavior	15	0.0625394	OPRK1, DBH, GRM5, MYO15A, SLC18A2, NKX2-1, ABAT, APBA2, VPS13A, ZNF385A, CHRNA3, NOVA1, APBA1, CACNA1B, CDH23
GO:0007097~nuclear migration	4	0.0631032	SYNE2, WDR81, FHOD1, MYH10
GO:0007614~short-term memory	4	0.0631032	BRINP1, SERPINF1, NPAS4, CUX2
GO:0007613~memory	12	0.0638104	JPH3, EIF4EBP2, ITGA8, SLC6A4, PPP3CB, RIN1, DBH, SHANK2, HTR2A, VLDLR, KCNK4, SORCS3
GO:0035176~social behavior	10	0.0664527	BRINP1, EIF4EBP2, NRXN2, SLC6A4, DRD4, GRIN1, PPP3CB, VPS13A, NPAS4, SHANK2
GO:0000910~cytokinesis	10	0.0664527	KIF23, RAB11FIP3, BECN1, PLK1, ZFYVE26, INCENP, KLHL9, BRCA2, NEK6, TTC19
GO:0010468~regulation of gene expression	17	0.0665867	CLN3, IL7, NELL1, KIAA0430, COL2A1, STAB2, VAV2, PTHLH, G6PC, HIF1A, EIF4A1, F2, APBA2, MAPK8IP3, ALKBH1, APBA1, ROM1
GO:0015297~antiporter activity	6	0.0667455	SLC7A1, SLC25A16, SLC7A13, SLC7A5, CLCN7, SLC7A7
GO:0031418~L-ascorbic acid binding	6	0.0667455	P3H3, P4HA1, P4HA3, EGLN3, DBH, ALKBH3
GO:0005980~glycogen catabolic process	6	0.0668156	G6PC, PYGM, PYGL, PHKG2, PFKM, CALM1
GO:0005874~microtubule	42	0.067044	KIF23, DNAH9, HAUS6, DYNC1LI2, TTLL13P, KIF27, TTLL5, FAM179B, KLC2, DNAH2, WDR81, IQGAP1, KIFC3, TTLL11, TUBGCP4, CYLD, TUBGCP3, NDE1, KLC1, INCENP, CAMSAP1, TEKT3, TUBA3C, NDRG1, TUBB8, CEP170B, DYNC1H1, TUBA1C, KIF12, DNM1L, KIF11, TUBGCP2, CSPP1, EML3, SARM1, CFAP20, TUBAL3, CLIP1, KIF26A, DNM1, NEK6, TCP11L1
GO:0006260~DNA replication	24	0.0674315	RECQL4, GINS2, CDK1, SSRP1, TICRR, POLG, CHTF8, FAM111A, POLE, RAD9B, RAD9A, POLA2, SIRT1, KIN, CDT1, IGHMBP2, SLX4, SIN3A, HELB, MCMDC2, SUPT16H, E4F1, RBM14, NFIB
GO:0005902~microvillus	11	0.0677441	BBS2, MYO1A, MYO1C, MYO7A, TEK, GIF, USH1C, STARD10, ANKS4B, WWOX, AOC3
GO:0009636~response to toxic substance	15	0.0678152	CDK1, TRPM6, SCFD1, ERCC6, CES1, PENK, LYN, ADAMTS13, SLC6A4, SLC22A8, SLC18A2, CDH1, GUCY2C, GSTP1, RAD51
GO:0000139~Golgi membrane	74	0.0679216	AP1G2, GBGT1, CLSTN3, FAM57B, ST3GAL2, ST6GALNAC4, COPB1, CHST15, PDGFD, GOLGA5, FNDC3A, GOLGA3, SEC23A, CLN3, RAB39A, ZDHHC7, CHST3, CORO7, CYP2E1, LPCAT2, CNGA4, CHST1, MAN2A2, ZDHHC17, ARHGAP32, ATP2C2, PLCE1, TRAPPC9, ARRB1, CTSC, CHSY1, CUX2, EXT1, MYO18A, PPP6C, GCNT3, CABP1, MAP4K2, RFFL, RIC3, RIC1, B3GNT9, GLIPR2, TNFRSF1A, NUMA1, GNPTAB, FOLR1, GALNT16, FUT4, GALNT18, GCNT1, GALNT12, SR…
GO:0022408~negative regulation of cell-cell adhesion	5	0.068698	WNT1, PTK2, CDH1, JAK2, ABL1
GO:0010633~negative regulation of epithelial cell migration	5	0.068698	DAB2IP, STRAP, MARVELD3, PTPRR, PBLD
GO:0014850~response to muscle activity	5	0.068698	TNS2, ADSSL1, HIF1A, POSTN, CAPN3
GO:0019005~SCF ubiquitin ligase complex	10	0.0705613	ARIH1, FBXW8, KBTBD4, FBXW5, BTRC, FBXO18, CCNF, FBXO31, KLHL11, FBXO32
GO:0016874~ligase activity	38	0.0707321	TRAF2, TTLL13P, BTRC, TTLL5, RFFL, MYCBP2, TTLL11, TRIM5, ARIH1, TRIM68, TRIM8, WWP2, WWP1, HECTD2, RNF38, RC3H2, NSMCE2, PELI2, E4F1, TRAF7, TRAF6, SUCLA2, RNF31, HECTD1, CCNB1IP1, DTX1, CBL, ACACA, UBE2I, TOPORS, BIRC3, RNF6, AREL1, UBR5, AMFR, RNF135, RNF20, NEURL1
GO:0005901~caveola	12	0.0708829	CLN3, TRPC4, CDH15, PTRF, LRP6, AKAP6, SCARB1, RANGRF, JAK2, MYOF, BMPR1A, HTR2A
GO:0003707~steroid hormone receptor activity	11	0.0721978	VDR, ESRRA, THRA, ESRRB, RXRA, ABHD2, RARA, RORA, NR4A3, NR1H3, NR2C1
GO:0071560~cellular response to transforming growth factor beta stimulus	10	0.0740159	COL4A2, PENK, FBN1, PPM1A, POSTN, PDE3A, APAF1, PDGFD, ABL1, WWOX
GO:0048565~digestive tract development	8	0.0747399	FGFR2, CHD8, CLMP, TRPS1, TGFB3, ALX4, DCHS1, LGR4
GO:0031648~protein destabilization	8	0.0747399	DERL1, CCDC88C, GSN, PLK1, BTRC, PRKDC, CTSH, SIRT1
GO:0015630~microtubule cytoskeleton	21	0.0750432	HYPK, ENKD1, ESRRA, DNM1L, CKAP5, KNSTRN, IQGAP1, TACC2, PKNOX2, FMN1, TUBGCP4, EML3, CDC42EP2, PLK1, ACTR1A, CLIP1, CCSER2, NDRG1, GAPDH, SPATA7, SPTAN1
GO:0006629~lipid metabolic process	24	0.0755659	PLCZ1, SREBF1, SC5D, APOBEC1, PLA2G15, FADS1, SLC16A11, PTGS1, ABHD4, ALDH3B2, PDE3A, ABCA2, ACLY, GDPD5, ZNF202, GDPD3, PNPLA7, PITPNM1, TPP1, LCAT, CPNE3, PAFAH1B2, LIPC, PC
GO:0009986~cell surface	68	0.0764624	TLN1, NRP1, PDIA3, SLC6A2, CLSTN3, CSPG4, TGFB3, TLR4, APOA4, ACVR1B, WNT1, KCNQ3, RSPO2, RC3H2, RARA, ANO6, SPN, ISLR2, PTPRJ, CIITA, CLMP, PKD2L1, AMBP, CCR7, SLITRK6, VAMP1, AOC3, FGFR2, HMGB1, WNT5B, ADAMTS13, ADAMTS15, DSCAML1, CX3CL1, GREM1, CDH5, TNFRSF1A, LY6D, ITGAX, HSPA2, FOLR1, ITGB7, TSPAN32, TEK, CLEC9A, FUT4, SCARB1, GP1BA, PCSK6, THBS1, FAM89B, TRPC4, GRIN1, TSPAN14, NLGN2, FURIN,…
GO:0005913~cell-cell adherens junction	43	0.0765711	TLN1, CHMP5, ABI1, CDH1, KLC2, GPRC5A, SCRIB, IQGAP1, CTTN, SH3GLB2, RPL6, ARHGAP1, NDRG1, FAM129B, RPL7A, EHD1, GOLGA3, EHD4, UNC45A, DAB2IP, LYN, CKAP5, TRIM29, CBL, PFKP, PPFIBP1, MPP7, MPRIP, JUP, TNKS1BP1, CORO1B, KRT18, PGM5, STXBP6, LASP1, PKP3, SPTBN2, TMOD3, EEF1G, EEF1D, TJP2, SPTAN1, EPN2
GO:0030512~negative regulation of transforming growth factor beta receptor signaling pathway	12	0.0768986	ASPN, WNT1, SKOR1, ADAMTSL2, STRAP, TGFB3, PPM1A, UBC, NKX2-1, SIRT1, PBLD, FAM89B
GO:0031145~anaphase-promoting complex-dependent catabolic process	14	0.0769053	ANAPC2, CDK1, PSMB11, PSMA1, PSMC6, PLK1, PSMB3, PSMA4, UBC, FBXO31, BUB1B, PSMD5, ANAPC7, PSMD7
GO:0000930~gamma-tubulin complex	4	0.0772626	TUBGCP4, CKAP5, CEP290, TOPORS
GO:0035257~nuclear hormone receptor binding	6	0.0790691	HIF1A, NCOA2, NCOR1, SIRT1, TCF7L2, TACC2
GO:0060045~positive regulation of cardiac muscle cell proliferation	6	0.0791502	FGFR2, CDK1, NOTCH1, FGF9, ZFPM2, BMPR1A
GO:0070207~protein homotrimerization	6	0.0791502	TRAF2, HSF1, MLKL, HSF4, SIGMAR1, PKD2L1
GO:0016023~cytoplasmic, membrane-bounded vesicle	21	0.0795771	FGFR2, PRF1, TAOK2, SGK3, MYO1C, BECN1, ABCA2, CORO7, ARRDC4, SIGMAR1, BDNF, KLC1, MAPKAP1, DUSP16, SCN8A, SNX33, TRAF7, GGNBP2, AXIN1, HTR2A, TBC1D2
GO:0032922~circadian regulation of gene expression	11	0.0796729	RBM4B, RAI1, HNF1B, CRY2, NCOA2, PRMT5, CREM, PER1, RORA, SIRT1, LGR4
GO:0003777~microtubule motor activity	14	0.0830986	KIF23, DYNC1LI2, DNAH9, KIF12, KIF11, KIF27, DNHD1, KLC2, DNAH2, KIFC3, KIF7, KLC1, KIF26A, DYNC1H1
GO:0008821~crossover junction endodeoxyribonuclease activity	4	0.0831092	TEFM, SLX4, EME2, MUS81
GO:0004716~receptor signaling protein tyrosine kinase activity	4	0.0831092	LYN, ERBB3, ERBB2, SYK
GO:0042359~vitamin D metabolic process	4	0.0831694	CUBN, CYP27B1, CYP11A1, LGMN
GO:0010761~fibroblast migration	4	0.0831694	SGPL1, SYNE2, ARID5B, ILK
GO:1902475~L-alpha-amino acid transmembrane transport	4	0.0831694	SLC7A13, SLC7A5, SLC43A1, SLC7A7
GO:0006476~protein deacetylation	4	0.0831694	HDAC5, SIN3A, SIRT1, SIRT3
GO:0000289~nuclear-transcribed mRNA poly(A) tail shortening	7	0.0834942	PAN2, EIF4B, TNKS1BP1, PARN, EIF4A1, CNOT2, SAMD4A
GO:0016032~viral process	41	0.0835487	PACS1, USP7, PACS2, TLN1, AP1G2, BTRC, VIM, NLRX1, HCFC2, ABI1, KIN, SCRIB, TNFRSF1A, CUL5, KLC1, COPB1, PSMB3, KRT7, NUP37, E4F1, SYK, ATF7IP, KAT2A, VAC14, LYN, CREB3, MPDZ, NUP88, CREBBP, UBE2I, KCTD5, SIRT1, AMBP, KRT18, HPX, IPO7, PSMA4, IPO5, EIF4A1, NUP107, SUPT6H
GO:0035855~megakaryocyte development	5	0.0841199	ABI1, PIP4K2A, VPS33B, ZNF385A, PTPN11
GO:0051642~centrosome localization	5	0.0841199	NDE1, DYNC1LI2, ASUN, SYNE2, NUBP1
GO:0006446~regulation of translational initiation	8	0.0845987	EIF4B, KLHL25, EIF3H, EIF3F, EIF4A1, EIF2B1, EIF3M, EIF2AK4
GO:0006974~cellular response to DNA damage stimulus	30	0.0848556	EGLN3, FOXO1, KIN, WDR76, CHD2, TRAF6, TOP2A, TAOK2, LYN, TAOK1, TAOK3, CBL, RAD9A, TOPORS, SIRT1, ATMIN, RAD51, USP28, NABP2, OTUB1, HELB, UBR5, FBXO18, ZBTB4, FBXO31, PIDD1, PARP4, ABL1, ZNF385A, APBB1
GO:0007169~transmembrane receptor protein tyrosine kinase signaling pathway	16	0.0869687	RET, FLT1, LYN, ERBB3, FLT3, ERBB2, CSPG4, ABI1, BDKRB2, GAB2, TEK, ROR2, TNK1, CD4, RAPGEF1, SYK
GO:0048476~Holliday junction resolvase complex	3	0.0874027	SLX4, EME2, MUS81
GO:0045252~oxoglutarate dehydrogenase complex	3	0.0874027	DLST, OGDHL, DHTKD1
GO:0004872~receptor activity	31	0.0876567	DERL1, TLR4, ANPEP, NEO1, PAQR4, NR2C1, APLNR, CUL5, ITGAX, FOLR1, P2RY2, ITGB7, TEK, ROBO4, TNFRSF19, CD4, CNTNAP1, AMHR2, RET, VAC14, CUBN, CMKLR1, TNFRSF13B, GABRA5, NLGN2, GUCY2D, NOTCH1, LYVE1, AMFR, UNC13C, UNC13B
GO:0005615~extracellular space	156	0.0887917	GDF3, KIAA0556, GLDN, IL18, GDF6, PRTG, TGFB3, POSTN, APOA4, WNT1, DMXL2, PAPPA, LCAT, SEMA7A, TPT1, PDGFD, KRT86, SPN, RNLS, ADAMTS20, NODAL, PTPRR, ACTN1, FGF23, KRT10, SERPING1, F7, VASH1, TIMM8B, PTHLH, CBLN3, SCGB2A1, CHID1, SERPINF1, F2, ST14, HMGB1, WNT5B, ENPP2, CES4A, ERBB3, SSH2, OAS3, DSCAML1, CCL8, CEP164, LRIG3, CX3CL1, GREM1, ABCA3, SERPINH1, ZFC3H1, SIAE, IFNA1, TTBK2, GCNT1, ANGPT…
GO:0035556~intracellular signal transduction	53	0.0902248	PLCZ1, ADCY4, CSPG4, MCF2L, PKN3, PPP1R1B, WNK4, PLCB2, SIK2, SYK, SGK3, MINK1, SOCS4, WNK2, ARHGEF12, DCDC1, DAPK1, ASB8, PRKCQ, MAP4K5, TNS2, RASGRF1, AKAP6, UNC13C, KSR1, UNC13B, MAP3K12, ASB6, PLEK2, SIPA1, MAP4K2, AKAP13, MYO9A, RASAL1, CORO2A, SH2B3, STK38L, DCLK1, DVL2, ABR, NPR2, DGKH, GUCY2C, GSG2, DNMBP, GUCY2D, CDC42BPG, RPS6KA4, ADCY9, DGKZ, DEPTOR, JAK2, CDC42BPB
GO:0009374~biotin binding	3	0.0922106	ACACB, PCCA, PC
GO:0030263~apoptotic chromosome condensation	3	0.0922598	ERN2, ACIN1, TOP2A
GO:0006089~lactate metabolic process	3	0.0922598	LDHB, HIF1A, SLC37A4
GO:0033600~negative regulation of mammary gland epithelial cell proliferation	3	0.0922598	PHB2, BRCA2, ETV4
GO:0061590~calcium activated phosphatidylcholine scrambling	3	0.0922598	ANO3, ANO6, ANO9
GO:0031325~positive regulation of cellular metabolic process	3	0.0922598	ACACA, ACLY, ACACB
GO:2000042~negative regulation of double-strand break repair via homologous recombination	3	0.0922598	HELB, FBXO18, PARPBP
GO:0038203~TORC2 signaling	3	0.0922598	MAPKAP1, PRR5L, SESN3
hsa05200:Pathways in cancer	54	0.0924724	ADCY4, FGF14, FGF9, ADCY6, STAT5B, ARNT2, TGFB3, FGF11, FOXO1, GLI1, MAX, WNT1, RARA, GNG2, PLCB2, PTGER2, RET, RXRA, FGF23, ARHGEF12, DAPK1, RAD51, JUP, HIF1A, LPAR5, LAMC3, GNB3, GSTP1, FGFR2, TRAF2, WNT5B, ERBB2, EGLN3, CDH1, BDKRB2, TCF7L2, PTK2, RASGRP2, SOS2, PIK3R5, TRAF6, AXIN1, DVL2, COL4A2, FLT3, CREBBP, CBL, BRCA2, BIRC3, HSP90B1, FZD10, ADCY9, ABL1, CRK
hsa04910:Insulin signaling pathway	22	0.0926043	SREBF1, HKDC1, PRKAG1, PHKG2, CBL, ACACA, FBP1, PDE3B, HK1, FOXO1, SOCS4, FBP2, ACACB, G6PC, PYGM, CALML3, PYGL, SOS2, PIK3R5, CRK, RAPGEF1, CALM1
GO:0045095~keratin filament	16	0.0936266	KRT6B, EPPK1, KRT13, KRTAP9-9, KRT73, KRT80, KRT18, KRT5, TTBK2, KRT76, KRT7, KRT14, KRT2, KRT3, FAM83H, KRT86
GO:0043197~dendritic spine	16	0.0936266	ANKS1B, GRIN1, PTPRO, SHANK2, FARP1, MTMR2, ARHGAP32, CTTN, ARHGAP44, ARRB1, P2RX3, SIPA1L1, SEZ6, APBB1, NEURL1, MYH10
GO:0051091~positive regulation of sequence-specific DNA binding transcription factor activity	17	0.094141	DVL2, TRAF2, NODAL, ARID5B, NEUROG3, DDX58, HDAC5, JUP, WNT1, TRIM5, TRIM8, PHB2, PPRC1, LRP6, JAK2, TRAF6, LRP5
GO:0005871~kinesin complex	10	0.0947499	KIF23, KIF12, NDE1, KIF11, KIF7, KIF27, KLC1, KLC2, KIF26A, KIFC3
GO:0016328~lateral plasma membrane	10	0.0947499	DVL2, JUP, MYO1A, MYO1C, ERBB3, CDH1, PTPRO, IQGAP1, AXIN1, ABCC6
GO:0032467~positive regulation of cytokinesis	8	0.0951626	KIF23, CSPP1, SSTR5, TAS2R13, CXCR5, OR1A2, MRGPRX2, SVIL
GO:0060325~face morphogenesis	7	0.0953582	SGPL1, PAX9, CRISPLD2, ARID5B, TGFB3, LRP6, PTPN11
GO:0032480~negative regulation of type I interferon production	7	0.0953582	DDX58, NLRC5, CYLD, PCBP2, UBC, NLRX1, RNF135
GO:0001654~eye development	7	0.0953582	GDF3, HMGB1, SALL2, MEIS2, FGF9, SMOC1, SLC39A5
GO:0003676~nucleic acid binding	162	1.78923e-08	RALY, HKR1, DBF4B, ZNF583, ZNF823, ZNF57, ZNF781, CNOT7, NONO, ZGPAT, RAVER2, ZNF302, DHX34, PATZ1, DHX35, ZNF445, RBM10, ZNF180, FIZ1, ZNF577, ZNF43, RBFOX2, ZNF641, SSX8, ZNF45, ZNF44, ZNF506, ZNF440, ZNF507, PTBP1, ZNF790, ZNF587B, ZNF814, ZNF791, ZNF813, ZNF792, ZNF816, ZNF793, HNRNPR, ZNF234, ZNF788, ZNF233, ZNF787, ZNF236, ZNF235, ASCC3, ZNF431, ZNF432, ZNF586, ZIM2, ZNF41, ZNF614, ZNF516, …
GO:0006351~transcription, DNA-templated	272	1.15067e-06	HKR1, XRCC6, ZNF57, HIRA, ZNF781, BBX, FSTL3, NONO, ZGPAT, MAMSTR, SIN3B, MED26, PHTF1, PATZ1, FIZ1, MAP2K6, ZNF43, ZNF641, L3MBTL4, PRAME, ZNF44, YY2, ZNF506, ZNF507, ZNF790, MECP2, ZNF791, ZNF792, ZNF793, TOX2, ZNF788, ZNF234, ZNF233, ZNF787, ZNF236, ZNF235, PIAS4, ASCC2, ASCC3, ZNF41, ZIM2, ZNF614, ZNF611, NFKBIB, CRTC1, ZNF131, MAGEA1, ZNF230, MYT1, XAB2, ZNF615, ZNF616, ZSCAN5B, ZNF227, TCF2…
GO:0006355~regulation of transcription, DNA-templated	216	2.1665e-06	HKR1, ZNF57, BBX, ZNF781, NONO, SIN3B, PHTF1, PATZ1, IZUMO2, FIZ1, MAP2K6, ZNF43, ZNF45, L3MBTL4, CHTOP, ZNF44, EMX1, ZNF506, YY2, ZNF507, ZNF587B, ZNF790, ZNF791, ZNF792, ZNF793, TOX2, ZNF788, ZNF234, ZNF233, ZNF787, ZNF236, ZNF235, ASCC2, ASCC3, OR7D2, ZNF41, ZIM2, ZNF614, ZNF611, ZNF131, ZNF230, MYT1, ZNF615, ZNF616, TCF20, ZNF227, ZNF226, ZNF225, LYL1, ZNF224, DMD, ZNF74, TCF3, ZNF70, ZNF398,…
GO:0005622~intracellular	191	2.91128e-06	EDN3, HKR1, HRAS, ZNF583, LTBP2, ZNF823, TUFT1, PLEKHM1, PITPNB, ZNF57, RGL3, INTS2, PRKCSH, ITSN1, IFNL2, ZNF302, ZNF445, ZNF180, MAP2K6, ZNF577, ZNF43, DBNL, SSX8, GTPBP1, TWF1, ZNF45, ZNF44, BCR, ROCK1, ACTN4, PLXNB1, ZNF506, ZNF440, ZNF790, ZNF587B, ZNF814, ZNF791, ZNF813, ZNF816, ZNF793, GCC2, TRAT1, DEPDC5, ZNF234, TRIM37, ZNF788, MAP4K3, ZNF233, ZNF235, SGSM1, CD40LG, ASCC3, NAA20, ZNF431,…
GO:0005634~nucleus	648	7.63219e-06	RPL18, HRAS, DBF4B, ZNF57, XRCC6, FSTL3, ZNF781, MED24, WTAP, MAGEC2, MAMSTR, BHLHB9, HIST1H2BL, MED26, DHX34, ACRC, PHTF1, SMOX, PDHA2, PATZ1, TLK2, LUC7L3, ZNF43, ZNF641, L3MBTL4, ZNF44, ZNF506, ZNF507, EFCAB13, PTBP1, ZNF790, ZNF587B, MECP2, BTBD7, ZNF791, ZNF792, MED14, ZNF793, ZNF234, ZNF788, ZNF233, ZNF787, ZNF236, ZNF235, ASCC2, MED15, NME1, ASCC3, NAA20, SMARCAL1, CMIP, GRAP2, ZNF41, ZNF6…
GO:0003700~transcription factor activity, sequence-specific DNA binding	146	9.81695e-06	ZNF583, HIRA, CNOT7, ZIC3, ZGPAT, ATOH1, ZNF182, ZNF302, PHTF1, CREB3L4, ZNF445, IZUMO2, ZNF577, ZNF43, ZNF641, ZNF45, L3MBTL4, STRN3, ZNF790, MECP2, ZNF587B, ZNF814, ZNF792, ZNF816, ZNF793, AHR, ZNF234, ZNF235, TFAP2B, TFAP2C, ZNF432, ZNF586, ZNF41, ZIM2, ZNF516, ZNF611, HMGB2, TFE3, ZNF131, MYBL2, MYT1, ZNF615, ZNF616, ZSCAN5B, SRY, ZNF227, TCF20, ZNF226, ZNF225, ZNF429, ZNF224, ZNF74, TCF4, SL…
GO:0061337~cardiac conduction	16	3.69466e-05	TRPM4, KCND3, SCN1B, SPTBN4, CACNG5, CACNG4, CACNB4, CACNG2, CACNG1, KCNJ2, KCNIP1, KCNJ14, KCNJ4, CACNA1C, CACNA1D, SCN5A
GO:0016569~covalent chromatin modification	25	0.000699092	BMI1, ZMYND11, L3MBTL4, FOXA2, IKZF1, L3MBTL2, FOXA3, RBL1, L3MBTL1, TRIM28, CBX4, HIRA, CECR2, CBX2, RB1, DAPK3, ATRX, CHD7, BPTF, BCORL1, CABIN1, DNMT1, TLK2, SMARCA1, SS18L1
GO:0071907~determination of digestive tract left/right asymmetry	5	0.00160316	CCDC103, MEGF8, CCDC40, CCDC39, ZIC3
GO:0086091~regulation of heart rate by cardiac conduction	11	0.00273293	TRPM4, KCND3, CAV1, SCN1B, DSG2, CACNA1G, KCNA5, KCNJ2, CACNA1C, CACNA1D, SCN5A
GO:0052629~phosphatidylinositol-3,5-bisphosphate 3-phosphatase activity	6	0.00370889	MTM1, MTMR3, MTMR8, MTMR6, MTMR7, MTMR4
GO:0045892~negative regulation of transcription, DNA-templated	73	0.00447157	E2F1, NKAP, PDGFB, XRCC6, CBX4, CBFA2T2, NONO, ZGPAT, ZNF148, PATZ1, DEDD2, ALX1, RBFOX2, ZNF93, ZNF280B, PRAME, STRN3, ZNF91, ZNF587B, MECP2, NDUFA13, RB1, CDK5, AHR, GZF1, PRAMEF17, PIAS4, TFAP2B, COMMD7, TSHZ3, THAP7, HMGB2, ARHGAP35, PRAMEF20, TNFRSF4, ZNF227, SET, ZNF224, NELFCD, GATAD2A, PASD1, BCOR, FBXW11, LHX9, BMP4, DMBX1, ZBTB7A, NACC1, BMP2, CREBZF, IKZF1, TBX3, TRIM28, L3MBTL1, KCTD1…
GO:0005886~plasma membrane	476	0.00473181	SLC9A8, HRAS, SLC9A6, SLC9A3, ITSN1, OR6S1, CDH22, GRIN2C, OSCAR, CDH26, ROCK1, TTC7B, PTPRS, F9, MARK3, THY1, SSTR3, KIAA1524, MC2R, SLC9C2, CD226, RALGPS1, SCN1B, GNAI1, CRTC1, OR2T3, MAGEA1, CACNB4, KCNJ2, HCRTR2, PROCR, RAC3, OR2T6, SLC28A2, SPHK1, ATP11C, KCNJ4, KCNJ6, CD207, NLGN4X, SMURF2, SYTL1, OR2AT4, KCNK17, GNAZ, OPRM1, ATP10B, TRPV2, USH1G, GLRA2, OR2V2, KCNK10, SLC23A2, CEACAM8, GUC…
GO:0005654~nucleoplasm	330	0.0056068	XRCC2, DBF4B, U2AF2, XRCC6, HIRA, BBX, FSTL3, MED24, INTS2, WTAP, SLC26A11, NONO, MVB12A, SIN3B, HIST1H2BL, MED26, RPP30, PATZ1, RPL11, SUPT5H, LUC7L3, MAP2K6, ESCO1, ZNF641, CHTOP, ZNF45, RRP7A, EFCAB13, STRN3, BYSL, PTBP1, MED14, UBR2, TOX4, TOX2, PNKP, MED15, PIAS4, ASCC2, ASCC3, SMARCAL1, RPS11, GRAP2, CRTC1, CDC34, MYT1, MYBL2, ARFGEF1, XAB2, COIL, HNRNPA3, TCF20, PASD1, ZNF74, VEZF1, TCF3, …
GO:0071141~SMAD protein complex	5	0.0058149	SMAD9, SMAD5, SMAD4, SMAD2, SNW1
hsa04550:Signaling pathways regulating pluripotency of stem cells	26	0.0059732	BMI1, HRAS, HNF1A, APC2, IL6ST, WNT3A, ZIC3, ACVR1C, AKT1, AXIN2, MYC, TCF3, AKT2, BMP4, NANOG, BMP2, SMAD9, TBX3, MAP2K2, SMAD5, SMAD4, SMAD2, WNT2B, WNT7B, DLX5, JAK3
GO:0071013~catalytic step 2 spliceosome	19	0.00616715	TFIP11, RALY, SNRPA1, EFTUD2, ALYREF, SNRPD2, SNW1, DDX5, DGCR14, CACTIN, XAB2, HNRNPR, PRPF19, HNRNPA3, SNRPB, SRRM1, DHX35, SNRPE, SNRPG
GO:0003677~DNA binding	211	0.00704871	HKR1, ZNF57, XRCC6, BBX, ZNF781, HIST1H2BL, MED26, PHTF1, PATZ1, LUC7L3, ZNF43, ZNF641, ZNF45, ZNF44, EMX1, YY2, ZNF507, ZNF790, MECP2, ZNF791, TOX4, TOX2, ZNF788, ZNF234, ZNF233, ZNF787, ZNF236, ZNF235, PIAS4, ZNF41, ZIM2, ZNF614, ZNF611, ZNF131, ZNF230, MYT1, ZNF615, ZSCAN5B, ZNF616, DTD1, TCF20, ZNF227, ZNF226, ZNF225, LYL1, ZNF224, ZNF74, VEZF1, TCF4, TCF3, LHX9, ZNF70, ZNF398, DMBX1, SMAD9, …
GO:0008380~RNA splicing	29	0.00923662	NCBP1, SNRPD2, WBP11, WTAP, NONO, AKAP17A, PPP2CA, SRRM1, MBNL3, RBM10, LUC7L3, TFIP11, RBFOX2, SNRPA1, EFTUD2, PTBP1, FMR1, AKAP8L, TTF2, SON, SUGP2, PPP1R8, SRSF8, ESRP1, SNRPB, KHSRP, RBM39, THOC2, SNRPG
GO:0003682~chromatin binding	58	0.00997548	NKAP, CBX4, CBX2, NONO, TOP1, SIN3B, CDC45, BAHCC1, PATZ1, SUPT5H, RBPJL, FMR1, ESR1, POLR1A, MECP2, APTX, PKN1, MBD3, TRIM37, NCOA5, NCOA6, MCMBP, TFAP2B, ZNF431, PAF1, ZMYND11, TSHZ3, TSHZ2, POLA1, HCFC1, CIC, HDGFRP2, ZMYND8, CHD7, SAFB, AUTS2, BCAS3, TCF4, SLC30A9, UPF1, NUCKS1, TRIM28, L3MBTL1, SMAD4, SMAD2, SIRT6, SIRT2, ATRX, DLX3, NUP62, NUPR1, UBTF, POLD1, PHF21B, MPO, DNMT1, CHAF1A, CHA…
GO:0086045~membrane depolarization during AV node cell action potential	4	0.0101814	TRPM4, CACNA1G, CACNA1C, SCN5A
GO:0046856~phosphatidylinositol dephosphorylation	8	0.0103257	MTM1, MTMR3, INPP5J, INPPL1, INPP5E, MTMR8, MTMR6, MTMR7
GO:1901522~positive regulation of transcription from RNA polymerase II promoter involved in cellular response to chemical stimulus	5	0.0103526	BMP2, SMAD9, DLX5, SMAD5, SMAD4
GO:0016020~membrane	262	0.010356	RPL18, HRAS, HM13, QPCTL, IL6ST, PRR11, XRCC6, CD52, INTS2, SELENBP1, RNF213, NONO, APOE, DHX34, CHRNA4, IGLL1, RPL11, RPL12, F11, GTPBP1, OSBP2, BCR, CAPNS1, BYSL, PTBP1, LRRC1, STRN4, MED14, GCC2, ERGIC3, OGFOD3, CRHR1, PNKP, LILRB2, MGAT3, CD37, NPC1, MED15, NME1, CD40LG, ASCC3, PDGFRB, RPS11, EXT2, GIGYF2, MYH7B, TPST2, ENPP7, MFNG, MYO9B, OAS2, XAB2, COIL, ACE, STX16, TCTN1, SLC28A2, STX10, …
GO:0005515~protein binding	988	0.0110154	PDP1, OXA1L, HRAS, USE1, MED24, WTAP, ITSN1, TMEM147, GRIN2C, MED26, BTBD2, L3MBTL4, PTBP1, MECP2, ZNF792, MED14, MIIP, MARK3, TOX4, MARK4, THY1, NPC1, SSTR3, MED15, ASCC3, SERPINF2, KIAA1524, MC2R, CMIP, SCN1B, NFKBIB, CRTC1, CHCHD4, MYBL2, XAB2, ARFGEF1, SULT4A1, RAC3, LYL1, PPP2R2B, ZNF398, LAPTM4B, ZC3H13, UNC119, KIF3B, FOXRED2, NXF3, DUSP21, ATP11C, EMILIN2, USF2, PARP9, NLGN4Y, NLGN4X, SRS…
GO:0043407~negative regulation of MAP kinase activity	10	0.0112556	BMP4, NUP62, APOE, HMGCR, NF1, IL1B, CDK5RAP3, PTPN1, BMP7, ADIPOQ
GO:0000398~mRNA splicing, via spliceosome	36	0.0113602	RALY, NCBP1, POLR2F, U2AF2, SNRPD2, CACTIN, DGCR14, XAB2, PRPF19, HNRNPA3, NONO, RAVER2, CLP1, SRRM1, ZRSR1, DHX35, GEMIN7, TFIP11, SNRPA1, EFTUD2, ALYREF, PTBP1, ELAVL2, SNW1, DDX5, HNRNPR, METTL14, HNRNPUL1, GTF2F1, CPSF7, SNRPB, NCBP2L, USP49, RBM15, SNRPE, SNRPG
GO:0005737~cytoplasm	588	0.0114337	RPL18, RP1, HRAS, DBF4B, XRCC2, XRCC6, MAGEC2, BHLHB9, HIST1H2BL, PHTF1, SMOX, RPL11, DHX35, MAP2K6, ZNF641, PTPRM, NCF2, ZNF645, EFCAB13, LRRC1, MARK4, SPAG9, SSTR3, MED15, NME1, ASCC3, NAA20, KIAA1524, MC2R, ADAMTS1, CMIP, RPS11, GRAP2, RALGPS1, AHCY, GNAI1, CRTC1, MAGEA1, ARFGEF1, TP53TG5, ACSBG1, DTD1, SH3BP5L, TPGS1, SPATS2, ZDHHC9, PPP1R42, TCF3, PTGR2, MAP2K2, PCNT, SPHK1, JTB, NXF3, DUSP2…
GO:0050771~negative regulation of axonogenesis	7	0.0114885	GDI1, MAG, ARHGEF1, NGFR, ARHGDIA, THY1, EPHB2
GO:0004438~phosphatidylinositol-3-phosphatase activity	6	0.0122246	MTM1, MTMR3, MTMR8, MTMR6, MTMR7, MTMR4
GO:0051899~membrane depolarization	8	0.0130524	CAV1, SCN1B, CHRNA4, CACNG4, CACNG2, CACNB4, ADIPOQ, SCN5A
GO:0007160~cell-matrix adhesion	18	0.0131942	PARVG, LYPD3, LYPD5, STRC, FERMT2, ITGB4, ITGA3, VTN, COL5A3, CD63, CDK5, SORBS1, TIAM1, CD34, FGB, MSLN, OTOA, ITGA2B
GO:0045292~mRNA cis splicing, via spliceosome	5	0.0158183	NCBP1, WBP11, NCBP2L, WBP4, RNF113A
GO:0001568~blood vessel development	10	0.0160694	ATP7A, DLX3, MIB1, TBX3, MAP3K3, CDX4, SPHK1, STRA6, GJA4, AHR
GO:0039706~co-receptor binding	5	0.0161724	BMP4, BMP2, DKK1, WNT3A, LRRK2
GO:0016607~nuclear speck	32	0.0168099	THAP7, U2AF2, CBX4, TIMM50, WBP11, WTAP, WBP4, CXXC1, PRPF19, NONO, SRY, AKAP17A, DDX3X, GATAD2A, SRRM1, LUC7L3, DDX42, TFIP11, ZCCHC12, ZC3H13, CHTOP, EPAS1, EFTUD2, ALYREF, AKAP8L, CCNL1, CCNL2, SON, PPP1R8, RBM39, THOC2, RBM15
GO:0042760~very long-chain fatty acid catabolic process	4	0.0187596	ACADVL, ABCD1, ABCD3, SLC27A4
GO:0050772~positive regulation of axonogenesis	7	0.0191074	TIAM1, STK11, PLXNB1, PLXNB2, PLXNB3, NGFR, ARHGDIA
GO:0070412~R-SMAD binding	7	0.0196729	MYOCD, SMAD4, RANBP3, SMAD2, PARP1, LDLRAD4, PMEPA1
GO:0086002~cardiac muscle cell action potential involved in contraction	6	0.0217003	SCN1B, CACNA1G, KCNJ2, CACNA1C, CACNA1D, SCN5A
GO:0098794~postsynapse	7	0.0218195	OPRM1, AKT1, GSK3A, FMR1, MECP2, NLGN3, LRRK2
GO:0038083~peptidyl-tyrosine autophosphorylation	10	0.0222399	TYK2, STYK1, HCK, PTK6, JAK3, YES1, ABL2, INSR, SRMS, MATK
GO:0006260~DNA replication	26	0.0224755	ACHE, BLM, POLA1, NFIX, MCM10, DTD1, RPA1, TOP1, CDC45, MCM8, SET, NT5M, ORC5, POLG2, RTEL1, KAT7, UPF1, REV1, RNASEH2A, RBBP8, POLD4, POLD1, NCOA6, CHAF1A, CHAF1B, DSCC1
GO:0035556~intracellular signal transduction	57	0.0227331	RP1, TUFT1, PLEKHM1, PREX1, PRKCSH, ITSN1, AKT1, HMOX1, ACOT11, GUCY1A2, STK39, TLK2, DEDD2, AKT2, PRKCA, BCR, PLXNB1, WNK3, DAPK3, STK4, DEPDC5, MAP4K3, TYK2, MAST3, HUNK, MAST1, DEF8, LRRK2, LCP2, CAPS, RALGPS1, MKNK2, ASB12, MAP4K1, MYO9B, BRSK1, ASB16, ASB15, RAB40B, ASB18, TP53TG5, SH3BP5L, RGS11, DDX3X, DGKE, MAP3K3, RAC3, GUCY2F, SPHK1, SMAD4, SMAD2, TMPRSS6, RASSF5, PRKAR1A, TSSK2, JAK3, …
GO:0030334~regulation of cell migration	15	0.0228224	GNA13, PARD6B, PLXNA3, PLXNB1, PLXNB2, JAG1, CDK5, FLNA, THY1, AKT1, LAMA3, LAMA5, AMOT, TMSB4Y, AKT2
hsa04725:Cholinergic synapse	20	0.0233031	PRKCA, ACHE, HRAS, GNAI1, GNA11, KCNJ2, KCNJ14, AKT1, KCNJ4, CHRM5, KCNJ6, GNB1, CHRNA4, CHRNA7, CREB3L4, KCNQ2, CACNA1C, CACNA1D, CAMK2A, AKT2
GO:0004872~receptor activity	34	0.0242075	RTN4RL1, TLR2, ITGB4, MED24, TLR7, TLR8, SLC1A5, TNFRSF11A, LILRA2, PROCR, CD93, CSF3R, CSF2RB, STRA6, RAMP1, CD200R1, ICAM1, GUCY2F, PLXNB1, ATRN, CD160, MED14, NLGN3, AGER, CD180, NOTCH3, LILRB2, NPC1, NLGN4Y, LILRB4, NLGN4X, AMOT, NGFR, CD226
GO:0043388~positive regulation of DNA binding	8	0.0242693	HMGB2, MYOCD, NME1, CEBPG, TRIM28, IRF4, MYC, SIRT2
GO:0030532~small nuclear ribonucleoprotein complex	6	0.0259105	SNRPA1, SNRPB, SNRPD2, SNRPE, ARFGEF1, SNRPG
GO:0042802~identical protein binding	98	0.0270113	CALHM1, PCDHA7, IER5, PDGFB, VTN, MCM10, NONO, AKT1, GOT2, HOOK2, TMEM173, PRMT1, DES, APOE, DPP9, POLG2, RBM10, DPP4, CRYBB2, PHC2, M1AP, PTPRM, HSP90AA1, FOXJ2, MIEF1, PCDHB6, SCUBE1, BAIAP2, FMR1, STK26, ESR1, FAM118A, ZNF792, RB1, DAPK3, STK4, GCC2, PYCR1, MAD2L1, NME1, CLPP, ERN1, GPR50, DHPS, RUVBL2, IL12B, PRNP, LRRK2, ITGA2B, NMNAT1, THAP7, CAV1, AHCY, ABCD1, SNX8, TFG, HCFC1, CLDN10, KCN…
GO:0048812~neuron projection morphogenesis	11	0.0273698	ATP7A, ANKRD27, DBNL, EPB41L3, WNT7B, SLC9A6, PLXNB1, DMD, LRRK2, BMP7, KIRREL3
GO:2000114~regulation of establishment of cell polarity	6	0.0281137	ROCK1, WDPCP, RICTOR, BCAS3, ARFGEF1, KANK1
GO:0034709~methylosome	5	0.0292822	PRMT1, SNRPB, SNRPD2, SNRPE, SNRPG
GO:0006295~nucleotide-excision repair, DNA incision, 3'-to lesion	7	0.02959	RPA1, CUL4A, BIVM-ERCC5, GTF2H3, CUL4B, PARP1, ERCC1
GO:0003360~brainstem development	4	0.0302601	NLGN4X, SMAD4, SCN5A, GART
GO:0043312~neutrophil degranulation	4	0.0302601	VAMP7, STXBP2, STXBP3, VAMP2
GO:0061014~positive regulation of mRNA catabolic process	5	0.0313742	GTPBP1, UPF1, KHSRP, CNOT7, HNRNPR
GO:0032693~negative regulation of interleukin-10 production	5	0.0313742	EPX, PRG2, IL12B, JAK3, AGER
GO:0045078~positive regulation of interferon-gamma biosynthetic process	5	0.0313742	CEBPG, IL12B, TLR7, TLR8, EBI3
GO:0060394~negative regulation of pathway-restricted SMAD protein phosphorylation	5	0.0313742	DKK1, SMAD7, XBP1, LDLRAD4, PMEPA1
GO:0086047~membrane depolarization during Purkinje myocyte cell action potential	3	0.0315177	TRPM4, SCN1B, SCN5A
GO:0015643~toxic substance binding	5	0.0320404	AZU1, PHAX, A4GALT, CHRNA7, CYP4B1
GO:0004896~cytokine receptor activity	9	0.0335529	IL1RL1, IL6ST, CSF2RB, CSF3R, EPOR, IL12B, IL11RA, EBI3, IFNLR1
GO:0005730~nucleolus	107	0.0340262	RPL18, RNMT, XRCC6, SELENBP1, MCM10, RNF213, ESF1, NONO, TOP1, PHTF1, RPL11, RPL12, RPS27A, GNL3, CHTOP, NCF2, ZNF506, STK24, BYSL, PTBP1, FMR1, HNRNPR, PNKP, TXNDC2, RPS11, DNTTIP1, HMGB2, BLM, ACAT2, COIL, ARFGEF1, FBXW7, RPL10A, VEZF1, KRI1, EWSR1, KAT7, SMAD7, DDX5, CPS1, LARP4B, PLK3, ZNF415, WDR3, DHX40, CHAF1A, PARP1, ASNA1, HINT2, PRRX1, GNL3L, DGCR8, HMOX1, RTF1, CDK5RAP3, MYC, WDR33, DE…
GO:0016705~oxidoreductase activity, acting on paired donors, with incorporation or reduction of molecular oxygen	12	0.0372608	CYP4F8, PTGIS, CYP27A1, CYP11B2, CYP2C8, CYP4F22, EGLN2, CYP4F11, CYP4F12, CYP4F2, OGFOD3, CYP4B1
GO:0006296~nucleotide-excision repair, DNA incision, 5'-to lesion	9	0.0376749	RPA1, POLD4, CUL4A, POLD1, GTF2H3, CUL4B, PARP1, RPS27A, ERCC1
GO:0035102~PRC1 complex	5	0.0388913	BMI1, CBX4, CBX2, CBX8, PHC2
GO:0032508~DNA duplex unwinding	10	0.0393346	ATRX, CDC45, DDX3X, BLM, ASCC3, XRCC6, RUVBL2, RAD54B, RTEL1, CHD3
GO:0001701~in utero embryonic development	29	0.0394626	GNA13, ACVRL1, XRCC2, WNT3A, KEAP1, PRKCSH, PRMT1, CHD7, APBA3, TCTN1, POLG2, MYC, RTCB, WDTC1, BMP2, EMX1, TBX3, SMAD4, SMAD2, MBD3, KIDINS220, ATP7A, MIB1, NMT1, WNT7B, CUL4A, TANC2, DSC3, AMOT
GO:0006886~intracellular protein transport	35	0.0413159	ARFGAP3, AP1M1, AP1M2, AP1B1, SNX8, AP3S2, TBC1D16, STX16, AP3B2, CHM, TBC1D4, AP3D1, VPS35, VPS16, KDELR1, STX10, RAMP1, ASPSCR1, SYNRG, RPGR, TBC1D10A, WLS, HID1, CDK5, STX1B, TBC1D25, SGSM1, TOM1L1, AP2A1, IPO4, NGFR, EVI5L, AP4B1, CLTCL1, SYTL1
GO:0045019~negative regulation of nitric oxide biosynthetic process	5	0.0415958	OPRM1, CAV1, PTGIS, CD34, KHSRP
GO:0086012~membrane depolarization during cardiac muscle cell action potential	5	0.0415958	SCN1B, KCNJ2, CACNA1C, CACNA1D, SCN5A
GO:2000573~positive regulation of DNA biosynthetic process	5	0.0415958	NOX4, PDGFB, PAK3, PDGFRB, MYC
GO:0016709~oxidoreductase activity, acting on paired donors, with incorporation or reduction of molecular oxygen, NAD(P)H as one donor, and incorporation of one atom of oxygen	5	0.0424555	CYP11B2, MICAL2, MICAL3, CYP4F11, CYP4F2
hsa04510:Focal adhesion	31	0.0434194	HRAS, CAV1, PDGFB, PPP1R12C, ITGB4, ARHGAP35, VTN, CHAD, AKT1, RAC3, PAK3, COMP, SHC3, AKT2, PARVG, PRKCA, COL4A1, ACTN4, ROCK1, ITGA3, COL5A3, VAV1, COL4A6, FLNA, COL4A5, LAMA3, LAMA5, PDGFRB, LAMC1, PARVB, ITGA2B
GO:0007257~activation of JUN kinase activity	9	0.0434364	DBNL, SPAG9, WNT7B, HACD3, CD40LG, ERN1, MAP4K1, PKN1, PTPN1
GO:0033683~nucleotide-excision repair, DNA incision	9	0.0434364	RPA1, POLD4, CUL4A, POLD1, GTF2H3, CUL4B, PARP1, RPS27A, ERCC1
GO:0030853~negative regulation of granulocyte differentiation	4	0.0446505	ZBTB46, CUL4A, ADIPOQ, C1QC
GO:0006690~icosanoid metabolic process	4	0.0446505	CYP4F8, PTGIS, CYP4F22, CYP4F2
GO:0071407~cellular response to organic cyclic compound	12	0.0447137	KLF5, AKT1, TMEM173, BMP2, SMAD9, PAK3, SMAD5, HCFC1, IL1B, AXIN2, ARHGDIA, TMF1
GO:0030097~hemopoiesis	12	0.0447137	BMI1, GLRX5, PDGFB, CUL4A, CD34, CRIP2, WNT3A, TAZ, L3MBTL1, MKNK2, JAG1, KIRREL3
GO:0000287~magnesium ion binding	31	0.0449539	ENDOV, ATP10B, STK11, GNAI1, FARS2, PPM1B, BRSK1, MTG2, NUDT7, ILVBL, ENOPH1, ATP8B3, ENOSF1, PDXK, ATP4A, STK26, SPHK1, TREX2, IDH3B, ATP11C, STK4, MAST3, MAST1, EYA2, NME1, ATP9A, ERN1, PPM1N, TSSK2, ABL2, TSSK6
GO:0042472~inner ear morphogenesis	11	0.0450306	ATOH1, CHD7, BCR, DLX6, WNT3A, USH1G, DLX5, PRRX1, CELSR1, ATP6V1B1, EPHB2
GO:0016247~channel regulator activity	4	0.0453939	SNF8, CACNG5, CACNG4, CACNG2
GO:0031234~extrinsic component of cytoplasmic side of plasma membrane	13	0.0468629	TYK2, STYK1, TIAM1, PTK6, HCK, FERMT2, JAK3, YES1, ABL2, KCNIP1, SRMS, MATK, DTNA
hsa05412:Arrhythmogenic right ventricular cardiomyopathy (ARVC)	13	0.0469673	DES, DSG2, DMD, CACNG5, ITGB4, CACNG4, ITGA3, CACNG2, CACNB4, CACNA1C, CACNG1, CACNA1D, ITGA2B
GO:0045595~regulation of cell differentiation	8	0.0475716	KLK6, NANOG, HMGB2, APC2, PPP2CA, STK26, TFAP2B, TBX19
GO:0005874~microtubule	43	0.0478226	HAUS4, RP1, APC2, TTLL9, HAUS1, CCT2, TTLL6, PTPN20, TTLL1, ARHGAP4, HOOK2, TUBGCP5, TPGS1, TIAM1, CDK5RAP3, TEKT4, TUBG2, TUBB1, TUBB4A, MTUS1, KIF3B, KIF17, RMDN1, MAP2K2, PCNT, KIF18B, BIRC5, KIF16B, DNAI2, MARK4, EML5, SIRT2, FSD1, RASSF5, TUBA8, NAV1, TBCD, TUBD1, TUBA4A, GAS2L1, KIF19, KATNAL2, KIF26B
hsa04730:Long-term depression	12	0.0481765	CRHR1, PRKCA, GNA13, GNAZ, HRAS, GRIA2, GNAI1, MAP2K2, PPP2CA, GNA11, GRID2, GUCY1A2
GO:0048661~positive regulation of smooth muscle cell proliferation	12	0.0497031	NOTCH3, AKT1, BMP4, PDGFB, HMGCR, SERPINF2, HMOX1, TGM2, PDGFRB, ABCC4, CALCRL, MYC
GO:0005686~U2 snRNP	6	0.050021	CCDC97, SNRPA1, SNRPB, SNRPD2, SNRPE, SNRPG
GO:0016235~aggresome	8	0.0500835	MVB12A, TRIM37, DBF4B, POLD1, CABIN1, RAB11B, EEF2, CCZ1
GO:0005518~collagen binding	12	0.0516562	ACHE, PDGFB, SMAD7, COMP, C1QTNF1, MRC2, CCBE1, SMAD4, ITGA3, VTN, COL5A3, ADGRG1
hsa04120:Ubiquitin mediated proteolysis	22	0.0520807	FZR1, UBE2Z, UBE4A, UBE3B, PPIL2, UBE2F, KEAP1, CDC34, CDC27, PRPF19, TRIM37, UBE2O, FBXW7, CUL4A, PIAS4, UBA1, BIRC8, SMURF2, CUL4B, ITCH, FBXW11, UBE2U
GO:0035064~methylated histone binding	11	0.0522904	ATRX, ZMYND11, RBBP5, L3MBTL2, FMR1, L3MBTL1, CBX4, CBX2, KDM4A, CBX8, ZMYND8
GO:0004702~receptor signaling protein serine/threonine kinase activity	11	0.0522904	MAP4K3, ACVRL1, PAK3, MAP2K2, STK24, STK26, STK39, MAP3K14, STK4, MAP2K6, ACVR1C
GO:0071625~vocalization behavior	5	0.0534726	NLGN4Y, NLGN4X, NLGN3, MYH14, SHANK1
GO:0070208~protein heterotrimerization	5	0.0534726	C1QTNF6, NUP62, GNB1, C1QTNF1, ADIPOQ
GO:0098719~sodium ion import across plasma membrane	5	0.0534726	TRPM4, SLC9A8, SLC9A6, SLC9A3, SLC9C2
GO:0019226~transmission of nerve impulse	6	0.0539784	CHRM5, SPTBN4, CACNG5, CACNG4, CACNG2, OTOA
GO:0032092~positive regulation of protein binding	12	0.0550553	BMP4, ACE, TMEM173, MFNG, CAV1, BMP2, TIAM1, WNT3A, VTN, LRRK2, STK4, CDK5
GO:0030509~BMP signaling pathway	14	0.056611	ZCCHC12, BMP4, MEGF8, BMP2, SMAD9, ACVRL1, USP9Y, SMAD7, SMAD5, SMAD4, RGMB, DLX5, SMURF2, BMP7
GO:0030324~lung development	14	0.056611	RAB3A, WNT7B, CCDC40, EPAS1, LAMA5, CCBE1, TBX4, FSTL3, SMAD2, STRA6, ITGA3, CCDC39, ZIC3, SIM2
GO:0030326~embryonic limb morphogenesis	9	0.0566267	MEGF8, HNF1A, DKK1, DLX6, DLX5, TBX4, PRRX1, BMP7, ALX1
GO:0048365~Rac GTPase binding	9	0.0584148	ARHGAP4, CAV1, NCF2, TIAM1, ARFIP2, PKN1, DOCK7, FLNA, CDKL5
GO:0032042~mitochondrial DNA metabolic process	3	0.0586126	LONP1, POLG2, PARP1
GO:0034088~maintenance of mitotic sister chromatid cohesion	3	0.0586126	MAU2, RB1, DSCC1
GO:0018685~alkane 1-monooxygenase activity	3	0.0593108	CYP4F8, CYP4F12, CYP4F2
GO:0070740~tubulin-glutamic acid ligase activity	3	0.0593108	TPGS1, TRIM25, TTLL1
GO:0005765~lysosomal membrane	38	0.0601285	AP1M1, AP1M2, HM13, SLC44A2, SLC38A9, AP1B1, PLEKHM1, GNAI1, GNA11, SLC26A11, RRAGB, ABCA5, MIOS, OSBPL1A, AP3D1, DNAJC5, MCOLN1, VPS35, VPS16, CCZ1, PQLC2, DPP4, EVA1A, ABCB9, SPPL2B, C18ORF8, ATP11C, SPPL2C, CD63, TMEM74, TRPM2, DEPDC5, TMEM106B, NPC1, UBA1, GNB1, VAMP7, MFSD12
GO:0000792~heterochromatin	6	0.0602271	UBA1, MECP2, CBX2, MBD3, CBX8, PHC2
GO:0005681~spliceosomal complex	16	0.0615939	TFIP11, SNRPA1, EFTUD2, U2AF2, SNRPD2, WBP11, SNW1, WBP4, HNRNPR, TTF2, AKAP17A, PPP1R8, SNRPB, ZRSR1, SNRPE, SNRPG
GO:0016570~histone modification	4	0.0617995	RTF1, AURKC, HLCS, PAF1
GO:0060013~righting reflex	4	0.0617995	USP46, AUTS2, AFG3L2, SHANK1
GO:0019221~cytokine-mediated signaling pathway	21	0.0618988	IL2RB, RTN4RL1, IL6ST, HCK, LRRC4B, ZNF675, LRRC4C, IL11RA, IL17RA, CHAD, IL17REL, TGM2, IL1B, CSF3R, IFNA14, IL12B, IL1RAPL2, EBI3, IFNLR1, IFNA17, IL22RA2
hsa05222:Small cell lung cancer	15	0.061902	E2F1, COL4A1, ITGA3, RB1, COL4A6, COL4A5, AKT1, LAMA3, LAMA5, BIRC8, NOS2, LAMC1, MYC, AKT2, ITGA2B
GO:0043588~skin development	8	0.0632283	ATP7A, TFAP2B, ITGB4, ITGA3, COL5A3, ARRDC3, SLITRK5, SLC27A4
GO:0010467~gene expression	10	0.0636675	NOX4, HNRNPA3, NCBP1, POLR2F, METTL14, GTF2F1, PTBP1, IGF2BP1, WTAP, HNRNPR
GO:0030520~intracellular estrogen receptor signaling pathway	6	0.0648756	RBFOX2, SAFB, NCOA6, ESR1, EGLN2, CARM1
GO:0030879~mammary gland development	6	0.0648756	CAV1, TBX3, WNT3A, FASN, ARHGAP35, HOXB9
GO:0048844~artery morphogenesis	6	0.0648756	NOTCH3, SMAD7, APOE, NF1, PRRX1, STRA6
GO:0001676~long-chain fatty acid metabolic process	6	0.0648756	SLC27A1, CYP4F12, CYP4F2, CPT1A, SLC27A4, ACSBG1
GO:0006293~nucleotide-excision repair, preincision complex stabilization	6	0.0648756	RPA1, CUL4A, GTF2H3, CUL4B, PARP1, ERCC1
hsa05410:Hypertrophic cardiomyopathy (HCM)	14	0.065043	ACE, ACTC1, DES, DMD, CACNG5, ITGB4, CACNG4, ITGA3, CACNG2, CACNB4, CACNA1C, CACNG1, CACNA1D, ITGA2B
GO:0006468~protein phosphorylation	60	0.0658919	ACVRL1, PDGFB, PHKB, AURKC, ACVR1C, AKT1, STK39, TLK2, MATK, PRKCA, BCR, LIMK2, ROCK1, STK24, PNCK, STK26, PKN1, WNK3, MARK4, DAPK3, STK4, CDKL5, MAP4K3, TYK2, HUNK, C19ORF35, MAST1, ERN1, RIPK4, LRRK2, CTSG, STK11, PPP4R1, MKNK2, MAP4K1, BRSK1, CAMKV, PTK6, STK19, CAMK2A, GUCY2F, BMP2, SMAD9, ALPK2, HCK, SMAD5, STRADA, SMAD2, BIRC5, ILF3, TEX14, PLK3, GMFG, GSK3A, DYRK1B, TSSK2, JAK3, CDK20, LIP…
GO:0007215~glutamate receptor signaling pathway	5	0.066983	GRIK1, GRIN2C, KCNB1, FMR1, GRID2
GO:2000251~positive regulation of actin cytoskeleton reorganization	5	0.066983	HRAS, HCK, BAIAP2, BCAS3, CDK5
GO:0004970~ionotropic glutamate receptor activity	5	0.068293	GRIA2, GRIK1, GRIN2C, GRID2, GRID1
GO:0005521~lamin binding	5	0.068293	NARF, BNIP3L, SUN2, AKAP8L, PRNP
GO:0001707~mesoderm formation	7	0.0701609	DKK1, NF2, PRKAR1A, SMAD2, WLS, BMP7, EXT2
GO:0007528~neuromuscular junction development	7	0.0701609	MUSK, COL4A1, CACNG2, CACNB4, AFG3L2, LRRK2, COL4A5
GO:0032088~negative regulation of NF-kappaB transcription factor activity	13	0.0703257	PELI1, LRRC1, ZNF675, CACTIN, TRIM37, PTGIS, PIAS4, NLRP12, CDK5RAP3, RWDD3, ITCH, COMMD7, BMP7
GO:0004713~protein tyrosine kinase activity	21	0.0739563	TWF1, BCR, HSP90AA1, MAP2K2, HCK, CDC37, EPHB2, TYK2, MUSK, PTK6, DYRK1B, PDGFRB, CSF2RB, JAK3, YES1, ABL2, INSR, MAP2K6, FGF3, SRMS, MATK
GO:0044822~poly(A) RNA binding	137	0.0755625	RALY, NCBP1, CHERP, U2AF2, XRCC6, SNRPD2, RPS27L, CACTIN, NONO, GOT2, APOBEC3B, ESF1, TOP1, AKAP17A, RAVER2, DHX34, RPP30, SRRM1, RPL11, DHX35, PUM2, MRPL39, RPL12, SUPT5H, RBM10, RPS27A, LUC7L3, GNL3, RBFOX2, SNRPA1, GTPBP1, CHTOP, ACTN4, RRP7A, BYSL, EFTUD2, PTBP1, FMR1, MECP2, EEF2, YTHDF1, HNRNPR, NME1, ASCC3, SNRPB, RPS11, GIGYF2, SNRPG, HMGB2, IGF2BP1, C1ORF131, HNRNPA3, TCF20, DDX3X, SPATS…
GO:0000785~chromatin	15	0.0762065	ESCO1, UPF1, MAU2, NUCKS1, L3MBTL1, AKAP8L, POLA1, APTX, UBR2, SNW1, HLCS, RB1, TOX4, BAHCC1, DSCC1
GO:0030336~negative regulation of cell migration	16	0.0766045	TMEFF2, ACVRL1, ADARB1, NF2, SMAD7, STK24, PLXNB3, NF1, MIIP, LDLRAD4, ADIPOQ, ZMYND8, KANK1, THY1, ARHGAP4, ARHGDIA
GO:0007266~Rho protein signal transduction	10	0.0787664	GNA13, ARHGAP4, ARHGEF1, ROCK1, HACD3, MYO9B, CELSR1, ADGRG1, ARHGDIA, EPS8L1
GO:0001934~positive regulation of protein phosphorylation	20	0.0792611	BMP4, HRAS, BMP2, C3, OPRL1, WNT3A, STK4, ADIPOQ, AKT1, CARD14, MUSK, RSPO1, XBP1, PLA2G6, IL1B, AXIN2, LRRK2, FIZ1, INSR, AKT2
GO:0034613~cellular protein localization	9	0.0807249	PRPF19, DMD, WNT3A, GRID2, AMOT, CD63, AXIN2, LRRK2, RRAGB
GO:0044070~regulation of anion transport	4	0.0815057	LRRC8E, RAB11B, CA2, PDZK1
GO:0035136~forelimb morphogenesis	4	0.0815057	SALL3, TBX3, RNF165, TFAP2B
GO:0070286~axonemal dynein complex assembly	4	0.0815057	CCDC103, CCDC40, PIH1D3, CCDC39
GO:0035646~endosome to melanosome transport	4	0.0815057	ANKRD27, AP1M1, AP3D1, CD63
GO:0042769~DNA damage response, detection of DNA damage	8	0.0816717	RPA1, PNKP, POLD4, CUL4A, POLD1, CUL4B, PARP1, RPS27A
GO:0051453~regulation of intracellular pH	8	0.0816717	SLC9A8, SLC9A6, SLC9A3, SLC9C2, SLC4A1, SLC4A9, CA2, SLC26A11
GO:0006275~regulation of DNA replication	5	0.0820773	ESCO1, ACVRL1, NUCKS1, PPP2CA, DSCC1
GO:0004843~thiol-dependent ubiquitin-specific protease activity	14	0.0822605	OTUD5, USP8, USP9Y, UFD1L, USP29, JOSD1, ZRANB1, USP46, USP49, USP16, ANKZF1, USP14, USP32, USP44
GO:0048037~cofactor binding	5	0.0836377	TYMS, BIRC5, ASNS, DDO, PHYH
GO:0031491~nucleosome binding	5	0.0836377	L3MBTL1, CABIN1, HIRA, DNTTIP1, SMARCA1
GO:0007010~cytoskeleton organization	24	0.0874747	MICAL2, MICAL3, FTCD, SIPA1L3, CECR2, WTIP, THY1, MAST3, ARHGAP4, PHIP, CYLC2, BRWD1, TUBA8, MAST1, DES, ACTL7B, APOE, LAMA5, DMD, TUBD1, ZRANB1, TUBA4A, TUBB4A, KLHL20
GO:0010629~negative regulation of gene expression	21	0.0891349	HRAS, ACVRL1, PDGFB, MAP2K2, INPPL1, RBL1, ESR1, CNPY2, SMAD2, RB1, CNOT7, PTRH2, TMF1, AKT1, ACE, NME1, CD34, ZNF148, GAS2L1, NOS2, KDM4A
GO:0043022~ribosome binding	10	0.0898143	GTPBP6, IMPACT, FMR1, EIF3K, LETMD1, EEF2, RICTOR, YTHDF1, HSPA5, GUF1
GO:0006635~fatty acid beta-oxidation	9	0.0899228	ACADVL, CPT1B, ECH1, ABCD1, ABCD3, ACAT2, ADIPOQ, CPT1A, SLC25A17
GO:0030540~female genitalia development	3	0.0909001	CHD7, TBX3, STRA6
GO:0001919~regulation of receptor recycling	3	0.0909001	TBC1D16, ACHE, KIF16B
GO:0030262~apoptotic nuclear changes	3	0.0909001	CDK5RAP3, DEDD2, ACVR1C
GO:1990966~ATP generation from poly-ADP-D-ribose	3	0.0909001	BPHL, PARP1, NMNAT1
GO:0043949~regulation of cAMP-mediated signaling	3	0.0909001	GNAI1, PDE4A, RASD2
GO:0019439~aromatic compound catabolic process	3	0.0909001	PON2, EPHX1, ATP5J
GO:0086046~membrane depolarization during SA node cell action potential	3	0.0909001	CACNA1G, CACNA1D, SCN5A
GO:0097070~ductus arteriosus closure	3	0.0909001	MYOCD, TFAP2B, STRA6
GO:0035469~determination of pancreatic left/right asymmetry	3	0.0909001	CCDC40, CCDC39, ZIC3
GO:0030054~cell junction	58	0.0915129	PRX, LZTS3, PLXNA3, GRIK1, FOXA2, GLRA2, LRRC4B, GABBR2, LRRC4C, ITSN1, MIOS, GRIN2C, GRID2, CHRNA4, CHRNA7, TLK2, LGI1, GRID1, DSCAM, BCR, FMR1, RIMBP2, SDK2, CACNG5, PSD3, ARHGAP28, CDK5, CHRM5, MRPS18B, VAMP7, PAF1, VAMP2, LRRK2, ACHE, ITGB4, BRSK1, RIMS4, NETO1, MUSK, SYN3, RAB11B, OLFM2, CAMK2A, LRFN3, DTNA, SYT11, KCNB1, SYT12, NLGN3, SHANK1, NMT1, KCNJ4, GRIA2, NLGN4Y, GTF2F1, NLGN4X, ADGR…
hsa05146:Amoebiasis	17	0.0916902	PRKCA, COL4A1, ACTN4, GNA11, TLR2, COL5A3, COL4A6, COL4A5, C8B, LAMA3, LAMA5, IL1B, SERPINB13, NOS2, LAMC1, IL12B, CTSG
GO:0030618~transforming growth factor beta receptor, pathway-specific cytoplasmic mediator activity	3	0.0919396	SMAD9, SMAD5, SMAD2
GO:0042500~aspartic endopeptidase activity, intramembrane cleaving	3	0.0919396	HM13, SPPL2B, SPPL2C
GO:0004114~3',5'-cyclic-nucleotide phosphodiesterase activity	6	0.0920064	PDE6D, PDE2A, UBE4A, PDE1C, PDE7A, PDE4A
GO:0071773~cellular response to BMP stimulus	7	0.0924183	BMP4, BMP2, SMAD9, ACVRL1, DLX5, SMAD4, BMP7
GO:0034719~SMN-Sm protein complex	5	0.0929065	SNRPB, SNRPD2, SNRPE, GEMIN7, SNRPG
GO:0030426~growth cone	18	0.0930542	TSHZ3, PREX1, FMR1, IGF2BP1, ITGA3, DOCK7, CDK5, HNRNPR, SIRT2, THY1, ARHGAP4, CCDC120, INPP5J, RAC3, ADGRL1, MYH14, LRRK2, DSCAM
GO:0006397~mRNA processing	26	0.0948563	U2AF2, WTAP, NONO, AKAP17A, SRRM1, MBNL3, RBM10, WDR33, TFIP11, RBFOX2, ADARB1, PDE12, EFTUD2, PTBP1, FMR1, AKAP8L, HNRNPR, TTF2, SON, SUGP2, PPP1R8, PTCD2, SRSF8, ESRP1, KHSRP, RBM39
GO:0016328~lateral plasma membrane	10	0.0952285	EPCAM, DSG2, DMD, KCNB1, TBCD, MTCL1, ATP6V1B1, SCN5A, GJB2, SNTA1
GO:0031941~filamentous actin	7	0.0970031	SPECC1L, TMSB15A, FSCN2, RAC3, FERMT2, TMSB4Y, FLNA
GO:0030057~desmosome	6	0.0973118	EVPL, DSG2, DSG3, UBA1, DSC3, DSC1
GO:0002116~semaphorin receptor complex	4	0.0985441	PLXNA3, PLXNB1, PLXNB2, PLXNB3
GO:0005687~U4 snRNP	4	0.0985441	SNRPB, SNRPD2, SNRPE, SNRPG
GO:0051571~positive regulation of histone H3-K4 methylation	5	0.0986815	RTF1, SMAD4, DNMT1, AUTS2, SNW1
GO:0042325~regulation of phosphorylation	5	0.0986815	LIMK2, RICTOR, PPP1R14C, BMP7, SIRT2
GO:0030968~endoplasmic reticulum unfolded protein response	9	0.0996995	DERL2, XBP1, CDK5RAP3, CREB3L4, PTPN1, HSPA5, RNF121, EDEM2, PPP1R15A
GO:0050727~regulation of inflammatory response	17	0.000308111	RELA, FOXP1, PARK7, AHSG, NR1D2, PYCARD, MAS1, ACE2, FABP4, MGLL, CMA1, BCL6, BRD4, ADAMTS12, XCL1, TNFAIP3, FANCA
hsa04614:Renin-angiotensin system	9	0.00207808	PREP, AGTR2, KLK2, ATP6AP2, MAS1, ACE2, MRGPRD, MME, CMA1
GO:0090399~replicative senescence	6	0.00406849	CDKN1A, CDKN2A, MME, CHEK2, PLA2R1, CTC1
GO:0007338~single fertilization	14	0.00429729	ACR, SLC22A16, AR, SPACA7, SPAG1, MFGE8, PARK7, HOXD10, SPAG8, UMODL1, LRMP, HOXA9, ADAM21, AKAP3
GO:0019013~viral nucleocapsid	9	0.00437274	HNRNPL, HNRNPM, PRPF31, HNRNPF, SNRNP200, HNRNPD, LARP1B, HNRNPC, UTP14C
GO:0043014~alpha-tubulin binding	9	0.00446461	CAV3, B4GALT1, OFD1, BBS4, NDEL1, INO80, ARL4C, C9ORF24, HDAC6
GO:0030175~filopodium	15	0.008336	B4GALT1, PALM, ENAH, SRCIN1, ACTA1, PDPN, ACTA2, ERMN, MYO1G, IQGAP2, PPP1R9B, ITGA6, NGDN, MSN, ARL4C
hsa05162:Measles	25	0.00836866	OAS1, MAP3K7, CCNE2, HSPA1L, HSPA6, MSN, IRAK1, IL6, CD3G, CD3D, PIK3CB, RELA, STAT1, TAB2, STAT3, CDK2, CLEC4M, IKBKE, DOK1, CDKN1B, CCND2, GSK3B, IRF3, TNFAIP3, EIF2AK3
GO:0005537~mannose binding	7	0.0104055	MRC1, ACR, LMAN2L, COLEC10, LMAN2, LMAN1, CLEC4M
GO:0005886~plasma membrane	444	0.01195	TGOLN2, SCN3B, GRIN3B, OR4S1, MAP3K7, AGTR2, HTR1A, KCNK9, CTGF, CDH24, ARC, CLCA2, OR5R1, PIK3CB, PDPN, CDHR1, CDHR3, SPIRE1, OR1S2, ROR1, TMPRSS11B, SLC30A10, SH3GL2, IGKV3D-20, CYP51A1, CACNB1, OR8U1, KCNJ3, ADAP1, SLC29A1, CDC42EP1, RAC2, RPSA, OR5P3, IL23R, ATP11B, UPK3B, KCNK3, PCDH19, OR56A4, GNGT1, OR56A1, RGS2, RGS9, OR51I1, CHRNE, OR56A5, DPP3, GPR83, SEPHS1, DPP10, PDIA6, OR51Q1, ATP10…
GO:0007601~visual perception	31	0.0142067	BBS4, IRX5, CLDN19, POU6F2, HPS1, RORB, KCNJ10, CDH3, NR2E1, ZIC2, TYR, PDE6C, IMPG2, TGFBI, SLC24A1, RLBP1, CRYBB3, GUCA1A, OPA1, RGS16, BBS10, CNGA1, OPN5, RDH12, EML2, FAM161A, CACNA1F, COL1A1, RGS9, AOC2, GRK1
GO:0007256~activation of JNKK activity	4	0.0152589	TNIK, MAP3K10, NRK, MAP3K11
GO:0071013~catalytic step 2 spliceosome	17	0.0166191	SRSF1, CWC27, MAGOH, SKIV2L2, PRPF6, HNRNPM, SF3B1, AQR, FRG1, SRRM2, HNRNPF, SNRNP200, SYF2, PHF5A, HNRNPC, HNRNPH1, PPWD1
GO:0005549~odorant binding	17	0.0171061	OR5P3, OR5R1, OR5M10, OR5D14, OR5L2, OR5M3, OR8U1, OR5B2, OR9Q2, OR9K2, OR5AU1, OR6B3, OR8J1, OR8K3, OR8B2, OR5H6, OR5F1
GO:0001618~virus receptor activity	14	0.0179965	MRC1, NCAM1, RPSA, TYRO3, CR1, HYAL3, ITGAV, GYPA, ACE2, CDHR3, ITGB5, MOG, SELPLG, CLEC4M
GO:0000398~mRNA splicing, via spliceosome	33	0.0186389	SRSF1, POLR2E, SKIV2L2, SF3B5, CTNNBL1, HNRNPL, HNRNPM, SF3B1, GPKOW, FRG1, SRRM2, HNRNPF, HNRNPD, DHX16, HNRNPC, ZRSR2, NOVA2, PPWD1, PRPF31, RBM41, CWC27, MAGOH, PRPF3, U2AF1L4, PRPF6, SRSF3, SUGP1, AQR, SNRNP200, PSPC1, SYF2, PHF5A, HNRNPH1
GO:0046847~filopodium assembly	6	0.0209484	FGD2, FGD1, PPP1R9B, ITGA6, RAB17, FGD3
GO:0006069~ethanol oxidation	5	0.0244791	ACSS1, ADH1C, ALDH2, ADH1B, ACSS2
GO:0007567~parturition	5	0.0244791	MAFF, RXFP1, NRK, PTGFR, HPGD
GO:0090050~positive regulation of cell migration involved in sprouting angiogenesis	4	0.0247618	SRPX2, VEGFA, HDAC9, CIB1
GO:0010614~negative regulation of cardiac muscle hypertrophy	4	0.0247618	GLRX3, CAV3, RGS2, GSK3B
GO:0006302~double-strand break repair	13	0.0266408	XRCC4, EYA1, BRCC3, VCP, DTX3L, LIG1, BRE, SMARCA5, INO80, CHEK2, KAT5, MAD2L2, CIB1
GO:0003987~acetate-CoA ligase activity	3	0.0271582	ACSS1, ACSS2, ACSS3
GO:0030522~intracellular receptor signaling pathway	9	0.0295084	PPARA, AR, NR1D2, SLA2, RORB, HNF4G, NR5A2, STAT3, ARNT
GO:0045732~positive regulation of protein catabolic process	12	0.0311877	CSNK2A3, CDKN1B, PPP2R3A, LPCAT1, VCP, NEDD4, ATG7, GSK3B, SNX1, C4BPB, GGA1, TNFAIP3
GO:0046777~protein autophosphorylation	26	0.0315029	MAPKAPK5, PASK, AURKB, MAPKAPK2, CHEK2, PRKX, PDPK1, SLK, PTK2B, CAMK2B, IRAK1, TYRO3, TNIK, WNK1, BMX, MYLK2, PRKCG, PRKD1, NTRK3, GSK3B, DYRK1A, PDGFRA, MAP3K10, EIF2AK3, GRK1, MAP3K11
GO:0051457~maintenance of protein location in nucleus	5	0.0326568	ARL2, BBS4, MORC3, PML, BCL3
GO:0010888~negative regulation of lipid storage	4	0.0367549	IL6, PTPN2, ITGAV, CRP
GO:0002903~negative regulation of B cell apoptotic process	4	0.0367549	IRS2, BCL6, AURKB, FOXP1
GO:0008395~steroid hydroxylase activity	7	0.0371973	CYP2F1, CYP2B6, CYP21A2, CYP2S1, CYP2A6, CYP2W1, CYP19A1
GO:0016925~protein sumoylation	19	0.0380483	NUP133, XRCC4, EID3, SP100, MITF, PML, RING1, NUP188, AURKB, SENP5, SUMO3, PCGF2, EYA1, CDKN2A, SP3, NUP50, NOP58, HNRNPC, TOP2B
GO:0008544~epidermis development	15	0.0380842	PPARA, HOXB13, LCE2B, SPRR2E, ALDH3A2, ATP2A2, CTGF, ATP2C1, KRT15, LCE1C, BNC1, SPRR3, DSP, LAMC2, KRT83
GO:0005654~nucleoplasm	300	0.0413428	RPP38, TGOLN2, RAD51D, XRCC4, DYNC1LI1, RAD51C, MEF2A, GCAT, RORB, PNISR, AURKB, CDC16, ACBD5, GTF2IRD2B, HIST1H2BM, HIST1H2BN, MIS18A, MED27, CREB3L2, SAP30L, POLL, OPA1, TNIK, ANAPC5, LIG1, BARHL2, SPAG1, NAA25, ZHX3, HNF4G, PTPDC1, CEP152, ZNF500, CTDSPL2, DCLRE1A, AQR, CEP162, MTF2, MAD2L2, SCAF8, COASY, PALM, CRTC2, PPP2R3B, RHPN2, HUS1, GSDMD, HOXB13, CHEK2, PXN, VPS72, HSPA1L, DUSP18, RPS2…
GO:0048038~quinone binding	5	0.0419368	HHIPL1, ETFDH, VKORC1, AOC2, AOC1
GO:0061053~somite development	5	0.0422406	MTHFD1, NUP133, PPP2R3A, RBBP6, SHH
GO:0045499~chemorepellent activity	7	0.0439792	SEMA5B, FLRT2, NRG3, SEMA6D, SEMA4C, EFNA5, SEMA3A
GO:0071347~cellular response to interleukin-1	13	0.0440949	LCN2, CCL11, IL6, IL17A, HYAL3, RELA, PYCARD, ZC3H12A, USP10, ADAMTS12, XCL1, RC3H1, CCL17
hsa05212:Pancreatic cancer	13	0.0453101	E2F3, CDKN2A, RAC2, PIK3CB, RELA, ARHGEF6, VEGFA, ARAF, RAF1, SMAD3, STAT1, STAT3, RALGDS
hsa05214:Glioma	13	0.0453101	E2F3, CDKN1A, CDKN2A, PLCG1, PIK3CB, ARAF, PDGFRA, RAF1, PRKCG, SHC1, CAMK2B, SHC2, PRKCB
hsa04270:Vascular smooth muscle contraction	20	0.0474224	KCNMA1, RAMP2, ACTA2, PRKCH, RAF1, MYLK2, PRKCG, PRKG1, CACNA1S, PRKCB, MYL9, PRKACG, PLA2G12A, ARAF, PLA2G2A, ADRA1A, PLA2G4F, CACNA1F, PLCB1, PLA2G4D
GO:0046718~viral entry into host cell	14	0.0489038	MRC1, NCAM1, RPSA, TYRO3, CR1, ITGAV, GYPA, CD81, ACE2, CDHR3, ITGB5, MOG, SELPLG, CLEC4M
GO:0009411~response to UV	9	0.0502965	ERCC8, UVSSA, ERCC5, TYR, CASP7, HUS1, PRIMPOL, PML, MAP2K7
GO:0070301~cellular response to hydrogen peroxide	11	0.050531	LCN2, OSER1, MAP3K5, PCGF2, IL6, RELA, BNIP3, TNFAIP3, AQP1, PARK7, HDAC6
GO:0045959~negative regulation of complement activation, classical pathway	3	0.0510014	CR1, C4BPB, SUSD4
GO:0060452~positive regulation of cardiac muscle contraction	4	0.0511698	RGS2, CTGF, ACE2, ADRA1A
GO:0061088~regulation of sequestering of zinc ion	4	0.0511698	SLC30A4, SLC30A10, SLC30A8, SLC30A6
GO:0010838~positive regulation of keratinocyte proliferation	4	0.0511698	REG3A, TGM1, REG3G, CDH3
GO:2000059~negative regulation of protein ubiquitination involved in ubiquitin-dependent protein catabolic process	4	0.0511698	CDKN2A, PML, SUFU, TRIM39
GO:0016712~oxidoreductase activity, acting on paired donors, with incorporation or reduction of molecular oxygen, reduced flavin or flavoprotein as one donor, and incorporation of one atom of oxygen	5	0.0528628	CYP2F1, CYP2B6, CYP2A6, CYP1A2, CYP19A1
GO:0031116~positive regulation of microtubule polymerization	5	0.0532364	ARL2, CAV3, CDKN1B, RGS2, PSRC1
hsa04726:Serotonergic synapse	19	0.0532701	GABRB3, HTR4, RAF1, PRKCG, CACNA1S, KCNJ3, PRKCB, PRKACG, CYP4X1, GNGT1, HTR1A, ARAF, PLA2G4F, GNB4, CACNA1F, PLCB1, HTR3B, HTR2C, PLA2G4D
hsa04068:FoxO signaling pathway	22	0.0535498	IRS4, IL6, IRS2, PIK3CB, RAF1, SMAD3, BNIP3, PCK2, CCNG2, G6PC3, CDK2, STAT3, SOD2, PDPK1, CDKN1A, CDKN1B, CCNB2, CDKN2B, CCND2, ARAF, BCL6, CAT
hsa00010:Glycolysis / Gluconeogenesis	13	0.0553197	PFKL, ADPGK, ADH1C, ADH1B, ACSS2, PCK2, ALDH3A2, G6PC3, ACSS1, ALDH1A3, PGAM4, ALDH2, PDHA1
GO:0005758~mitochondrial intermembrane space	13	0.0557237	ARL2, PRELID1, SUOX, MICU1, SHMT2, OPA1, NDUFA8, NDUFB7, HTRA2, PPOX, CAT, NDUFS1, PARK7
GO:0004709~MAP kinase kinase kinase activity	6	0.0586723	MAP3K7, MAP3K5, MAP3K8, ARAF, MAP3K10, RAF1
GO:0005385~zinc ion transmembrane transporter activity	6	0.0586723	SLC30A4, SLC30A10, SLC30A8, SLC39A3, SLC39A2, SLC30A6
GO:0048536~spleen development	8	0.0590549	CDKN2B, CDH17, BCL3, CTC1, PPP2R3C, RC3H1, CITED2, FLVCR1
GO:0045736~negative regulation of cyclin-dependent protein serine/threonine kinase activity	6	0.0591485	CDKN1A, CDKN2A, CDKN1B, TFAP4, CDK5RAP1, TNFAIP3
GO:0045332~phospholipid translocation	6	0.0591485	KCNN4, ATP11B, ATP8B1, ATP10D, TMEM30A, ATP8B4
GO:0043434~response to peptide hormone	9	0.0635374	CDKN1B, ATP2A2, BTG1, CTGF, JUND, COL1A1, STAT1, EIF2B2, EIF2B4
GO:0015701~bicarbonate transport	9	0.0635374	SLC26A4, SLC26A6, CYB5R2, SLC4A11, CA5A, CA6, SLC4A7, SLC26A1, AQP1
GO:0051092~positive regulation of NF-kappaB transcription factor activity	20	0.0637328	IRAK1, AR, IL6, TMEM189-UBE2V1, RELA, PRKCH, ITGB2, TAB1, TAB2, AIM2, PRKCB, MAP3K7, PRKD1, RPS6KA5, TNFSF11, IL1RAP, PYCARD, CAT, LRRFIP1, CIB1
GO:0016810~hydrolase activity, acting on carbon-nitrogen (but not peptide) bonds	5	0.0651778	AMDHD1, AMDHD2, NAAA, DPYSL5, DPYS
GO:0015250~water channel activity	5	0.0651778	AQP12B, PDPN, AQP8, AQP4, AQP1
GO:0070528~protein kinase C signaling	5	0.0656268	SLC26A6, DGKQ, MAS1, PRKCH, PLVAP
GO:0006996~organelle organization	5	0.0656268	ATP2A2, HPS6, HPS3, KIF5C, HDAC6
GO:0034097~response to cytokine	10	0.0662373	SP100, MCL1, SYNJ1, COL3A1, JUND, PML, ACP5, MAPKAPK2, STAT1, PGGT1B
GO:0006515~misfolded or incompletely synthesized protein catabolic process	4	0.0678767	ATXN3, LONP2, OMA1, HDAC6
GO:0035871~protein K11-linked deubiquitination	4	0.0678767	USP30, USP37, TNFAIP3, VCPIP1
GO:0003197~endocardial cushion development	4	0.0678767	NEDD4, TBX5, BMPR2, CITED2
GO:0042802~identical protein binding	87	0.0724075	SYT1, XRCC4, CEP170P1, SNCAIP, CLDN9, SEPHS1, CHMP4A, E2F7, GYPA, GRIK5, ESD, BNIP3, HOOK3, OFD1, SLK, PACSIN2, EDC3, CEACAM16, PSMD4, SP100, LTBR, NOXO1, PFKL, RELA, PICK1, PADI3, PRPF3, KRTAP10-5, PRKD1, BLMH, UHRF1, NDEL1, SNRNP200, VEGFA, C1QL2, SDCBP, PSME3, C1QL4, MAPRE1, COL1A1, TNFAIP3, EIF2AK3, SH3GL2, TRIM39, MAP3K11, ARL6IP1, FKBP8, EID3, CLDN19, ALDH18A1, FKBP6, SNX1, NUFIP1, CHEK2, E…
GO:0007010~cytoskeleton organization	23	0.0727354	FGD2, FGD1, PALM, ARC, TNIK, CAP2, ABLIM3, BLK, BFSP1, GAN, CCL11, CYLC1, PDZD8, KRT15, FITM2, STRIP2, TUBB6, ACTL6B, TUBA3E, NCKIPSD, MSN, TUBA1A, FGD3
hsa04911:Insulin secretion	15	0.0734745	KCNMA1, CCKAR, ADCYAP1R1, PRKCG, CACNA1S, PRKCB, PRKACG, KCNN4, ATF4, KCNN3, CREB3L2, CAMK2B, CACNA1F, PLCB1, SNAP25
GO:0000786~nucleosome	15	0.0743559	HIST1H2AB, HIST1H2BB, HIST1H2BD, SHPRH, TNP1, HIST1H2BM, HIST1H2BN, HIST1H2AI, H2AFZ, HIST1H3C, HIST1H2AH, PRM2, HIST1H3F, HIST1H4J, HIST1H3H
GO:0045893~positive regulation of transcription, DNA-templated	62	0.0757433	PPARA, E2F3, RSF1, TMEM189-UBE2V1, MITF, RORB, GLI2, SHH, ZIC2, CITED2, AGTR2, PICALM, CDKN2A, CREB3L2, PLCB1, IRAK1, AR, SP100, RELA, EOMES, FOXN3, CDK2, CD38, SMARCA5, COL1A1, MAD2L2, MED1, TFAP4, TRIM16, CHEK2, CALCOCO1, ARNT, HAND2, NR1D2, LHX2, LHX3, HNRNPD, BCL3, CREBL2, ZNF423, KLF7, IL6, TRIP4, RFX6, TBX5, PSRC1, SMAD3, STAT1, KAT5, STAT3, ATXN7L3, ATF4, SP1, SP3, ETS2, THRAP3, PHF5A, NR5…
hsa05223:Non-small cell lung cancer	11	0.077311	PDPK1, E2F3, CDKN2A, PLCG1, PIK3CB, RASSF1, ARAF, RAF1, PRKCG, EML4, PRKCB
GO:0005158~insulin receptor binding	7	0.0784157	IRS4, DOK1, PDPK1, IRS2, ENPP1, SNX1, SHC1
GO:0070552~BRISC complex	3	0.0787013	SHMT2, BRCC3, BRE
GO:0098536~deuterosome	3	0.0787013	SASS6, CEP152, CCDC78
GO:0051591~response to cAMP	9	0.0787559	TYR, PTK2B, RELA, JUND, MMP19, PAX4, COL1A1, STAT1, AGXT
GO:0048147~negative regulation of fibroblast proliferation	7	0.0791023	AGTR2, MORC3, IFI30, C1QL4, EMD, SOD2, TP53INP1
GO:0048701~embryonic cranial skeleton morphogenesis	7	0.0791023	WDR19, IRX5, PDGFRA, SMAD3, MMP16, SLC39A3, ALX3
GO:0043507~positive regulation of JUN kinase activity	7	0.0791023	MAP3K7, FGD2, FZD8, MAP3K5, PTK2B, MAP3K10, MAP3K11
GO:0097371~MDM2/MDM4 family protein binding	3	0.0791915	PPARA, CDKN2A, PSME3
GO:0042578~phosphoric ester hydrolase activity	3	0.0791915	PGAP1, SYNJ1, SYNJ2
GO:0055093~response to hyperoxia	5	0.079374	CDKN1A, BNIP3, CAT, COL1A1, SOD2
GO:0031589~cell-substrate adhesion	5	0.079374	ITGA6, ITGAV, SMAD6, MYO1G, PRKX
GO:2001056~positive regulation of cysteine-type endopeptidase activity	3	0.0795149	PYCARD, NEK5, AIM2
GO:2000002~negative regulation of DNA damage checkpoint	3	0.0795149	BRD4, CHEK2, THOC5
GO:0002634~regulation of germinal center formation	3	0.0795149	BCL6, TNFAIP3, RC3H1
GO:0070842~aggresome assembly	3	0.0795149	VCP, UBD, HDAC6
GO:0003678~DNA helicase activity	6	0.0805578	ERCC8, RECQL, RECQL5, MCM7, INO80, SUPV3L1
GO:0033138~positive regulation of peptidyl-serine phosphorylation	12	0.0806969	PRKD1, NTRK3, IL6, NTF3, SFRP2, GSK3B, VEGFA, ARAF, RAF1, MAD2L2, PARK7, CREBL2
GO:0050896~response to stimulus	11	0.0809722	RDH12, IRX5, CLDN19, SLC24A4, TGFBI, HPS1, FAM161A, SCNN1B, SLC8B1, RLBP1, BBS10
GO:0051965~positive regulation of synapse assembly	11	0.0809722	LINGO2, NTRK3, FLRT2, SLITRK1, SLITRK4, CBLN1, SRPX2, LRRN3, IL1RAP, NLGN1, EFNA5
GO:0005737~cytoplasm	539	0.0812717	MEF2A, PNISR, CITED2, MAP3K7, CCDC141, BSX, TBPL2, HIST1H2BM, HIST1H2BN, MED27, MAP3K8, MAP2K7, ARC, TNIK, OPA1, BARHL2, KIF5C, COLEC10, SPAG1, MYLK2, NAA25, PTPDC1, SARS2, ZNF500, OGFOD1, MKS1, SPAG8, SPAG6, ROR1, PPP2R5E, EIF2AK3, SH3GL2, CRTC2, ODAM, PLCXD3, RHPN2, ACSBG2, REXO1L1P, ASL, ADAP1, DUSP18, TMEM50A, CDC42EP1, RAC2, PABPC3, IQSEC3, ZNF622, RPSA, RECQL5, CCDC81, SRSF3, EI24, RGS2, TS…
GO:0031090~organelle membrane	14	0.0816488	FLRT2, CYP2F1, CYP2B6, CYP51A1, CYP21A2, CYP2S1, CYP1A2, CYP4X1, CYP7B1, UGT2B17, SQLE, POMP, UGT2B11, CYP2A6
GO:0016020~membrane	235	0.0854627	DYNC1LI1, RPL15, AQP4, VPS51, ACBD5, PICALM, HTRA2, CDH24, PLD1, OPA1, CD3G, CDHR1, AARS, HTR4, CDHR3, WNK1, ERGIC1, CLEC4M, MKS1, CD38, SPAG8, AQR, NNT, ATP2C1, SERBP1, ACAP1, ASPHD2, VEGFA, PDGFRA, EFNA5, LAMC2, EIF2AK3, PALM, CLCN3, GCNT2, CYP51A1, ACSBG2, ADA, SORCS2, SLC29A1, CD68, LPCAT1, RAC2, NCAPG2, EMD, RPSA, IL23R, ATP11B, NTRK3, EI24, ATP2A2, CLCN5, GRK1, DPP10, GYPA, KCNJ10, GLI2, MM…
GO:0016591~DNA-directed RNA polymerase II, holoenzyme	4	0.0855237	ERCC5, RPAP2, RECQL5, RPRD1B
GO:0010628~positive regulation of gene expression	34	0.0858901	ODAM, LRRC32, MITF, CRP, PF4, CDH3, CALCOCO1, CITED2, HAND2, CTGF, HNRNPD, QKI, ZC3H12A, MSN, RAMP2, AR, IL6, ACTA1, ACTA2, PIK3CB, MYLK2, SMAD3, PTGFR, STAT3, PARK7, LCN2, NTRK3, PLSCR1, ATF4, CNTF, VEGFA, UBAP2, EIF2AK3, MED1
GO:0004861~cyclin-dependent protein serine/threonine kinase inhibitor activity	4	0.0862328	CDKN1A, CDKN2A, CDKN1B, CDKN2B
GO:0048407~platelet-derived growth factor binding	4	0.0862328	COL3A1, PDGFRA, COL6A1, COL1A1
GO:0060968~regulation of gene silencing	4	0.0867022	HIST1H3C, HIST1H3F, HIST1H3H, CDK2
GO:0002003~angiotensin maturation	4	0.0867022	ATP6AP2, ACE2, MME, CMA1
GO:0006497~protein lipidation	4	0.0867022	ATG10, ATG7, WIPI1, MTTP
GO:0008210~estrogen metabolic process	4	0.0867022	SULT1A1, UGT2B11, SULT1E1, HSD17B4
GO:0030851~granulocyte differentiation	4	0.0867022	SP3, ZFPM1, CBFA2T3, CITED2
GO:0008630~intrinsic apoptotic signaling pathway in response to DNA damage	9	0.0871117	IKBKE, MOAP1, MCL1, HTRA2, PCBP4, BCL2A1, PML, CHEK2, SOD2
GO:0016607~nuclear speck	27	0.0877344	SRSF1, YLPM1, PNISR, GLI2, PATL1, SF3B1, TRIM69, SRRM2, MAML3, PLCB1, PRPF31, DGKQ, MAGOH, RING1, YTHDC1, PRPF3, FAM76B, PRPF18, U2AF1L4, PRPF6, SRSF3, THRAP3, DYRK1A, HIF3A, PSPC1, PHF5A, ALKBH5
GO:0042177~negative regulation of protein catabolic process	7	0.0896217	RELA, SMAD3, TRIM40, PRKCG, SERPINB12, MAD2L2, PARK7
GO:0005975~carbohydrate metabolic process	24	0.0903333	B4GALT1, HHIPL1, GCNT4, HYAL3, B4GALT2, ADPGK, HEXA, MGAT4C, ST8SIA1, SLC3A2, CHI3L2, CHST5, FUCA2, B3GAT1, KIAA1161, AMDHD2, ST3GAL5, CHST6, ALDH2, GLO1, GK5, A4GNT, FUT2, B4GALT6
GO:0042060~wound healing	13	0.0927032	PPARA, KRT6A, IL6, CCM2L, COL3A1, SMAD3, RAF1, CDH3, ITGA9, MAP3K5, SPRR3, PDGFRA, DSP
GO:0070423~nucleotide-binding oligomerization domain containing signaling pathway	6	0.0936207	MAP3K7, IRAK1, TMEM189-UBE2V1, TAB1, TNFAIP3, TAB2
GO:0051536~iron-sulfur cluster binding	5	0.0938085	GLRX3, NFS1, ETFDH, CDK5RAP1, NDUFS1
GO:0036148~phosphatidylglycerol acyl-chain remodeling	5	0.0944222	LPCAT1, PLA2G12A, PLA2G2A, PLA2G4F, PLA2G4D
GO:0008360~regulation of cell shape	20	0.0950491	FGD2, RHOJ, FGD1, PALM, IL6, PALM2-AKAP2, PDPN, ARHGEF18, ERMN, ITGB2, PALMD, MYL12A, CCL11, CDC42EP1, PTK2B, STRIP2, VEGFA, MSN, BAMBI, FGD3
GO:0016049~cell growth	10	0.0963589	CAV3, AR, IL6, ACTA1, ITGAV, PRMT6, SLC3A2, ADRA1A, NOP58, LUZP4

## Sheet: Webgestalt
Supplementary Table 7C. webgestalt enrichment analysis of mutations for White, Black and Asian PCa patients.
White				Black				Asian
Description	Overlap	PValue	UserId	Description	Overlap	PValue	UserId	Description	Overlap	PValue	UserId
drug binding	1173	0	KCNT2;AKT3;GLYCTK;PDE4D;RARS2;KIF21A;MYH6;FANCM;KIF1C;ABCA9;AATK;NFATC1;AXL;CCT8;TCN2;MSH6;PIKFYVE;MAP2K3;ITK;ATM;HYOU1;HSPA8;LRRK1;DNAH3;NOD2;UBE2C;CCT8L2;SRPK3;MDN1;TP53;GLDC;ALK;LIG4;NLRP7;PTK7;PPIA;CALCR;ABCA8;SPO11;ILF2;ULK4;PRPF4B;DDX11;RUNX3;ITPKB;ATP2B2;MET;PSMC1;ATP10A;KIT;GAD2;MYH8;PIK3C3;TAF1;RYR2;ABCB11;TTBK1;RPS6KB2;SCYL2;MYH13;MYH1;SDSL;EARS2;PIP5K1C;OBSCN;TTN;RARB;ALAS1;GAK;MTHFD1L…	drug binding	193	6.97146e-07	MYH11;TP53;DNAH11;ABCA1;IGF1R;CTPS2;DDX3Y;ACSBG1;KIF1C;ACSM4;NWD1;TTN;NLRP7;MMACHC;SMC1A;RAD54L2;ACTB;AFG3L2;BMPR1A;NOS1;HIPK4;ADCY10;DHX30;CYP2C9;TRPM7;CLK1;SPATA5;CNR1;PRKDC;RFK;ATM;PPP5C;NLRP9;ALAS2;BRAF;DAPK1;MYH1;CAD;NLRP12;HK1;MYO15A;DAPK3;TLR8;NMNAT2;CPS1;LIG4;ATP8B4;TCN1;DYNC2H1;ACACA;SMCHD1;WNK3;CIITA;DNAH3;BMPR2;STK32B;EEF2K;SCYL3;PGK2;ATP1A2;BBS10;PI4KA;PYGL;EPRS;KSR1;CHD1L;ADCY8;FLT3;…	drug binding	41	0.00224208	IARS2;MYO7B;CDK14;JAK2;FKBP4;ACACA;DDX60;CACNA1B;ATP13A5;OASL;CARS2;PSMC6;MYO9A;KCNT2;AGXT2;CARS;MVK;KSR2;RYR2;ERBB2;QARS;PRKCZ;LRP2;KIF13A;MYO15A;ZAP70;EPHA7;CHD7;CSF1R;FKBP5;EPHB1;SYK;VWA8;SMCHD1;HLTF;RAD54B;MYH7;MYH11;CHD9;TP53;RYR1
response to drug	595	1.05456e-09	GNAI2;NQO1;AXL;TCN2;MAOB;ITGA2;USP47;TMBIM6;UFL1;ASIC1;GRIN2A;NOD2;SYT17;TP53;RALBP1;PPP2CB;RHOA;ABCA8;DDX11;NCKAP1L;CENPF;MET;FIBIN;CTNNB1;SLC22A2;GAD2;TAF1;RYR2;NET1;SYT9;ABCB1;PTEN;OTC;DRD3;SPI1;CHRNA6;CYP2C18;DNMT3B;ATR;EPO;NCOA1;GAD1;BRAF;SLC17A8;KDM6B;NR4A2;ADCY8;UNC79;P2RX1;CTPS1;DRD5;HGF;IL18RAP;SCN11A;CYP2C19;TACR3;SLC22A3;EGFR;MRGPRX1;TGFB1;KMT2A;NLRP1;S100A8;SETX;ITPR2;RYR3;SLC25A18;CF…	cellular response to drug	44	0.00224096	TP53;EIF4E;KCNE2;CACNA1S;ACTB;GPR37L1;SIRPA;PPP5C;BRAF;KMT2A;DNM2;CAD;BCL11A;SLC8A1;GNAI1;CTNNB1;ADCY8;PPARGC1A;SOX9;HMGA2;RNF149;CHRNB2;TRPM4;RBM22;KCNQ1;LRRK2;GAS6;DPEP1;ATF4;GNB1;CYBB;TGFB1;DNMT3A;SPIDR;KCNC1;ADCY6;STAT6;PDE8A;CDH1;RYR1;AXL;MAPK1;TAF1;CCL7	long-term synaptic potentiation	8	2.41098e-05	TNR;GFAP;SHANK1;PTEN;ADORA2A;PRKCZ;LRRTM1;SLC24A1
cellular response to drug	214	3.08242e-05	GNAI2;NQO1;AXL;NOD2;TP53;DDX11;MET;CTNNB1;TAF1;RYR2;NET1;PTEN;SPI1;DNMT3B;NCOA1;BRAF;KDM6B;ADCY8;HGF;IL18RAP;EGFR;TGFB1;KMT2A;SETX;ITPR2;RYR3;CFLAR;PPIF;CAD;REN;RYR1;TFRC;KCNQ1;KCNC1;BRCA1;GPLD1;DNM2;AGRN;ERRFI1;CASP9;PRKAA2;GSTM2;PTPN22;CHRNB2;ADAM15;HCN3;ARHGEF2;NTRK1;PTGS2;IL10;CHRM3;SMYD3;WDR35;DNMT3A;SLC8A1;PRKCE;BCL11A;RNF149;NFE2L2;MSTN;STK25;ADCY5;UMPS;ECT2;SLIT2;PPARGC1A;KDR;REST;PPP3CA;…	ion gated channel activity	58	2.57726e-08	KCNQ5;KCNE2;KCNH7;CACNA1S;SCN1A;GRIA1;BEST1;KCNH3;KCNC4;CNR1;KCNB1;CNGA1;ANO4;GRIK3;GRIA2;NMUR2;TRPA1;GRIA4;CACNA1G;KCNT1;CACNA1D;KCNU1;TMEM63C;CLCNKA;ITPR1;VDAC1;CACNG7;SCN10A;CHRNB4;PKD2L1;CACNB4;ANO3;GRIN2A;CHRNB2;TRPM4;PKD2;KCNK2;GABRB2;KCNQ1;GRIN2B;GAS6;KCNQ2;CACNA1E;CNGA4;LRRC55;CYBB;CLCNKB;CLCA1;ANO10;CACNA2D3;KCNC1;ANO1;SCN8A;CACNA1A;RYR1;KCND3;KCNH1;HCN4	postsynaptic density assembly	4	0.000135206	SHANK1;PTEN;LRRTM1;PTPRD
response to antineoplastic agent	66	8.51727e-05	DDX11;FIBIN;CTNNB1;DNMT3B;EPO;EGFR;TGFB1;CFLAR;KDM3B;BRCA1;ERRFI1;CASP9;ADAM15;GBA;HCN3;SMYD3;WDR35;MSTN;GHSR;UGT3A2;DHFR;EGR1;CTNNA1;LARP1;MAPK13;ARG1;SPIDR;FBXO32;HSF1;PTGR1;DDIT4;FOXO1;F7;RAD51;CDH1;SERPINF1;JUP;KAT7;RPL18A;MAP4K1;NUCB1;HMOX1;PDGFB;ASNS;ATRX;CPS1;FMR1;ICAM1;USP8;BLM;GJB2;OPA1;PCK2;TFAP4;XRN1;ADAM10;AGTR2;ZC3H12A;RECQL5;KIF1B;AQP1;SLC31A1;METTL21C;HNRNPD;TIMELESS;DAXX	ion channel activity	67	3.78706e-08	KCNQ5;SLC24A1;KCNE2;KCNH7;CACNA1S;SCN1A;GRIA1;SLC24A3;BEST1;KCNH3;KCNC4;TRPM7;CNR1;KCNB1;CNGA1;ANO4;GRIK3;GRIA2;GJC1;NMUR2;TRPA1;GRIA4;CACNA1G;KCNT1;CACNA1D;KCNU1;TMEM63C;CLCNKA;ITPR1;VDAC1;CACNG7;SCN10A;SLC24A5;PIDD1;CHRNB4;PKD2L1;CACNB4;ANO3;TRPC4;GRIN2A;CHRNB2;TRPM4;PKD2;KCNK2;GABRB2;KCNQ1;GRIN2B;GAS6;KCNQ2;CACNA1E;CNGA4;SLC26A9;LRRC55;ABCC9;CLCNKB;CLCA1;ANO10;CACNA2D3;KCNC1;ANO1;SCN8A;PKD1;CA…	calcium ion binding	24	0.000140299	SPTA1;FBN3;PCDHA10;CACNA1B;NOTCH3;HMCN1;LRP1B;ADGRV1;PCDHB1;DUOX1;THBS3;DCHS2;FAT3;RYR2;PADI3;LRP2;CDH23;NID2;PCDHGC5;RPH3A;TBC1D8B;COL20A1;FAT4;RYR1
purine nucleotide binding	1218	0	KCNT2;AKT3;GNAI2;GLYCTK;PDE4D;RARS2;KIF21A;MYH6;FANCM;KIF1C;ABCA9;AATK;AXL;CCT8;MX2;MSH6;PIKFYVE;MAP2K3;ITK;ATM;HYOU1;HSPA8;LRRK1;DNAH3;NOD2;UBE2C;CCT8L2;SRPK3;MDN1;NIN;TP53;RAB33A;TUBB3;MFN2;ALK;RHOA;LIG4;NLRP7;PTK7;ABCA8;SPO11;ILF2;RAPGEF4;ULK4;PRPF4B;DDX11;RUNX3;ITPKB;ATP2B2;MET;PSMC1;ATP10A;KIT;MYH8;PIK3C3;TAF1;ABCB11;UCP1;TTBK1;GAL3ST4;RPS6KB2;SCYL2;MYH13;MYH1;EIF5;EARS2;PIP5K1C;OBSCN;TTN;GA…	cation channel activity	55	6.10401e-08	KCNQ5;SLC24A1;KCNE2;KCNH7;CACNA1S;SCN1A;GRIA1;SLC24A3;KCNH3;KCNC4;TRPM7;CNR1;KCNB1;CNGA1;GRIK3;GRIA2;TRPA1;GRIA4;CACNA1G;KCNT1;CACNA1D;KCNU1;TMEM63C;ITPR1;CACNG7;SCN10A;SLC24A5;CHRNB4;PKD2L1;CACNB4;TRPC4;GRIN2A;CHRNB2;TRPM4;PKD2;KCNK2;KCNQ1;GRIN2B;GAS6;KCNQ2;CACNA1E;CNGA4;LRRC55;ABCC9;ANO10;CACNA2D3;KCNC1;ANO1;SCN8A;PKD1;CACNA1A;RYR1;KCND3;KCNH1;HCN4	postsynaptic specialization assembly	4	0.000308095	SHANK1;PTEN;LRRTM1;PTPRD
ion transport	982	0	LRRC8B;KCNT2;GNAI2;PDE4D;COL4A3BP;LRRC55;SLC8A3;CLTC;TCN2;MAOB;TMBIM6;TRDN;AHNAK;ASIC1;GRIN2A;RCVRN;KCNJ16;SSTR4;CCT8L2;SHANK3;GABRP;NALCN;KCNK2;SCN7A;SYT17;RALBP1;JPH2;CACNA1E;DLG4;RHOA;SPINK1;CACNA1A;SHROOM2;SLC6A14;SLC6A6;MCOLN3;CALCR;PKD1;SLC5A10;ATP2B2;ATP10A;NOX1;CTNNB1;SLC22A2;SLC12A9;ASIC2;KCNH6;RNF207;RYR2;ABCB11;UCP1;AZIN2;KMO;SLC2A12;SYT9;ATP2A1;ABCB1;PTEN;CYSLTR1;DRD3;LMTK2;KCNH5;SLC4…	ATP binding	173	9.88268e-08	MYH11;TP53;DNAH11;ABCA1;IGF1R;CTPS2;DDX3Y;ACSBG1;KIF1C;ACSM4;NWD1;TTN;NLRP7;SMC1A;RAD54L2;ACTB;AFG3L2;BMPR1A;HIPK4;ADCY10;DHX30;TRPM7;CLK1;SPATA5;PRKDC;RFK;ATM;PPP5C;NLRP9;BRAF;DAPK1;MYH1;CAD;NLRP12;HK1;MYO15A;DAPK3;NMNAT2;CPS1;LIG4;ATP8B4;DYNC2H1;ACACA;SMCHD1;WNK3;CIITA;DNAH3;BMPR2;STK32B;EEF2K;SCYL3;PGK2;ATP1A2;BBS10;PI4KA;PYGL;EPRS;KSR1;CHD1L;ADCY8;FLT3;KIF26B;TNIK;PPIP5K2;CDK12;ALPK2;CAMK2A;K…	excitatory synapse assembly	4	0.000368523	SHANK1;PTEN;LRRTM1;PTPRD
ATP binding	1017	0	KCNT2;AKT3;GLYCTK;RARS2;KIF21A;MYH6;FANCM;KIF1C;ABCA9;AATK;AXL;CCT8;MSH6;PIKFYVE;MAP2K3;ITK;ATM;HYOU1;HSPA8;LRRK1;DNAH3;NOD2;UBE2C;CCT8L2;SRPK3;MDN1;TP53;ALK;LIG4;NLRP7;PTK7;ABCA8;SPO11;ILF2;ULK4;PRPF4B;DDX11;RUNX3;ITPKB;ATP2B2;MET;PSMC1;ATP10A;KIT;MYH8;PIK3C3;TAF1;ABCB11;TTBK1;RPS6KB2;SCYL2;MYH13;MYH1;EARS2;PIP5K1C;OBSCN;TTN;GAK;MTHFD1L;MELK;DDX50;DYNC2H1;DYRK4;ATP2A1;ABCB1;KARS;SMARCA4;KIF13A;L…	cation channel complex	42	1.22276e-07	KCNQ5;AKAP6;KCNE2;CACNA1S;SCN1A;GRIA1;NOS1;KCNC4;KCNB1;GRIK3;GRIA2;SHANK1;GRIA4;CACNA1G;CACNA1D;CACNG7;SCN10A;AKAP9;PKD2L1;CACNB4;TRPC4;GRIN2A;TRPM4;PKD2;KCNK2;KCNQ1;GRIN2B;KCNQ2;CACNA1E;LRRC55;ABCC9;CATSPERG;CACNA2D3;KCNC1;SCN8A;PKD1;CACNA1A;RYR1;KCND3;KCNH1;EPS8;HCN4	adenyl ribonucleotide binding	39	0.000763247	ANK2;RYR2;CHD7;RYR1
synapse	747	0	PCLO;CTTNBP2;SLC8A3;CDH8;ITGA2;DCC;MYRIP;SYNE1;RPL7;HSPA8;ASIC1;GRIN2A;NR1D1;SHANK3;GABRP;IGSF9;KCNK2;LZTS1;SYT17;DLG4;RHOA;HIP1R;RAPGEF4;ATP2B2;EIF2S1;CTNNB1;CANX;SLC22A2;GAD2;COL13A1;SLC29A2;ASIC2;MKLN1;USH2A;PIP5K1C;GAK;SYT9;PTEN;DRD3;FBXO45;CHRNA6;GRIA4;MYH9;WASF2;BSN;HTT;SHARPIN;MAP1A;DLGAP1;CPT1C;CACNG7;GAD1;ADAM23;GAP43;DLG2;SLC17A8;SV2B;HAPLN1;PCDH15;PDLIM5;EXOC4;ADCY8;P2RX1;SEMA4F;SYNPO;…	ion channel complex	52	1.29489e-07	KCNQ5;AKAP6;KCNE2;CACNA1S;SCN1A;GRIA1;BEST1;NOS1;KCNC4;KCNB1;GRIK3;GRIA2;SHANK1;GRIA4;CACNA1G;CACNA1D;SHANK2;CLCNKA;CACNG7;SCN10A;AKAP9;PIDD1;CHRNB4;PKD2L1;CACNB4;TRPC4;GRIN2A;CHRNB2;TRPM4;PKD2;KCNK2;GABRB2;KCNQ1;GRIN2B;KCNQ2;CACNA1E;LRRC55;ABCC9;CATSPERG;CLCNKB;CACNA2D3;KCNC1;ANO1;SCN8A;PKD1;CACNA1A;RYR1;CUBN;KCND3;KCNH1;EPS8;HCN4	release of sequestered calcium ion into cytosol by sarcoplasmic reticulum	4	0.000802724	SHANK1;PTEN;LRRTM1;PTPRD
ion transmembrane transport	691	0	LRRC8B;KCNT2;PDE4D;LRRC55;SLC8A3;TRDN;AHNAK;ASIC1;GRIN2A;KCNJ16;CCT8L2;SHANK3;GABRP;NALCN;KCNK2;SCN7A;JPH2;CACNA1E;DLG4;CACNA1A;SHROOM2;SLC6A14;SLC6A6;MCOLN3;CALCR;PKD1;SLC5A10;ATP2B2;ATP10A;NOX1;SLC12A9;ASIC2;KCNH6;RNF207;RYR2;ABCB11;UCP1;SLC2A12;ATP2A1;ABCB1;PTEN;DRD3;KCNH5;SLC4A3;CHRNA6;TRPM3;GRIA4;HTT;EPO;CACNG7;ITPR3;SLC17A8;TMCO3;DHRS7C;HCN1;KCNJ8;UNC79;P2RX1;KCNA7;CLCNKA;CATSPER1;PLCG2;KCN…	voltage-gated ion channel activity	38	4.12894e-07	KCNQ5;KCNE2;KCNH7;CACNA1S;SCN1A;KCNH3;KCNC4;CNR1;KCNB1;CACNA1G;KCNT1;CACNA1D;KCNU1;CLCNKA;VDAC1;CACNG7;SCN10A;CACNB4;GRIN2A;PKD2;KCNK2;KCNQ1;GRIN2B;GAS6;KCNQ2;CACNA1E;LRRC55;CYBB;CLCNKB;CACNA2D3;KCNC1;ANO1;SCN8A;CACNA1A;RYR1;KCND3;KCNH1;HCN4	adenyl nucleotide binding	39	0.000897295	IARS2;MYO7B;CDK14;JAK2;FKBP4;ACACA;DDX60;CACNA1B;ATP13A5;OASL;CARS2;PSMC6;MYO9A;KCNT2;CARS;MVK;KSR2;ERBB2;QARS;PRKCZ;KIF13A;MYO15A;ZAP70;EPHA7;CHD7;CSF1R;EPHB1;SYK;VWA8;SMCHD1;HLTF;RAD54B;MYH7;MYH11;CHD9;TP53;RYR1
synapse part	598	0	PCLO;CTTNBP2;SLC8A3;CDH8;ITGA2;DCC;SYNE1;RPL7;HSPA8;GRIN2A;NR1D1;SHANK3;GABRP;KCNK2;LZTS1;SYT17;DLG4;RHOA;HIP1R;ATP2B2;CTNNB1;CANX;SLC22A2;GAD2;COL13A1;SLC29A2;ASIC2;USH2A;PIP5K1C;GAK;SYT9;PTEN;DRD3;FBXO45;CHRNA6;GRIA4;BSN;HTT;SHARPIN;DLGAP1;CPT1C;CACNG7;GAD1;ADAM23;GAP43;DLG2;SLC17A8;SV2B;PDLIM5;ADCY8;P2RX1;SEMA4F;SYNPO;ASAP1;CTNND1;CNTN6;GABRE;ADD2;PCDH17;KCNA1;TSC2;MAP2;CADPS2;BLOC1S6;SYNDIG1;…	voltage-gated channel activity	38	4.12894e-07	KCNQ5;KCNE2;KCNH7;CACNA1S;SCN1A;KCNH3;KCNC4;CNR1;KCNB1;CACNA1G;KCNT1;CACNA1D;KCNU1;CLCNKA;VDAC1;CACNG7;SCN10A;CACNB4;GRIN2A;PKD2;KCNK2;KCNQ1;GRIN2B;GAS6;KCNQ2;CACNA1E;LRRC55;CYBB;CLCNKB;CACNA2D3;KCNC1;ANO1;SCN8A;CACNA1A;RYR1;KCND3;KCNH1;HCN4	release of sequestered calcium ion into cytosol by endoplasmic reticulum	4	0.000920122	ANK2;RYR2;CHD7;RYR1
kinase activity	555	0	AKT3;CRIM1;GLYCTK;COL4A3BP;AATK;AXL;PIKFYVE;MAP2K3;ITK;ATM;LRRK1;SRPK3;LTBP4;ALK;PTK7;EFEMP1;ULK4;PRPF4B;ITPKB;MET;KIT;PIK3C3;TAF1;TTBK1;RPS6KB2;SCYL2;PIP5K1C;OBSCN;TTN;GAK;PIK3R1;MELK;DYRK4;LMTK2;CCNK;ATR;SIK3;CDK12;PI4KA;MYLK4;INSRR;MARK1;CDK15;BRAF;DLG2;ERCC2;PRKD2;HGF;DCLK3;PIP4K2C;GRK4;IL3RA;ERBB4;PIK3CD;EGFR;CCNA1;CSNK1G1;MAP2K4;RIPK3;PFKFB1;NRG2;SCYL1;PFKFB4;NLK;DGKK;CAD;CDK7;ALPK3;EPHA2;P…	ion transmembrane transport	134	9.05849e-07	KCNQ5;ABCA1;SLC24A1;PTPRC;AKAP6;STRA6;SLC9C2;SLC4A7;KCNE2;KCNH7;CACNA1S;SCN1A;CAV3;GRIA1;AFG3L2;SLC24A3;SLC37A1;BEST1;ADAMTS8;NOS1;KCNH3;KCNC4;TRPM7;KCNB1;CNGA1;DAPK1;DNM2;ANO4;SLC30A8;WNT3A;SLC4A2;ACACA;WNK3;GRIK3;SLC8A1;GRIA2;SLC16A7;GJC1;SHANK1;NMUR2;TRPA1;GRIA4;CACNA1G;ARC;KCNT1;ATP1A2;CACNA1D;KCNU1;SHANK2;TMEM63C;CLCNKA;ITPR1;PPARGC1A;VDAC1;ASPH;SLC4A1;CACNG7;SCN10A;SLC7A2;SLC24A5;SLC7A5;CAM…	postsynaptic density organization	4	0.00119026	TNR;JAK2;CADPS2;SHANK1;ADORA2A;PRKAR1B;PRKCZ;LRRTM1;PRKAR1A;SCN10A;EPHA7;PTPRD;EPHB1
calcium ion binding	475	0	MACF1;ITSN2;LRP1B;EFCC1;FAT4;PCLO;FAT3;CDH8;SULF2;PCDH10;RCVRN;NIN;SYT17;SPTA1;CACNA1E;LTBP4;PCDHA9;PCDHAC1;NELL2;PCDHGB4;DST;EFEMP1;PCDHGA7;FBLN1;THBS4;CANX;RYR2;MAN1B1;TTN;PCDHB8;MELK;SYT9;NINL;ATP2A1;PCDH11Y;PCDHGA3;PCDHB15;DCHS2;CHP2;PCDHB7;FAT2;PCDHA12;ITPR3;BRAF;FBN3;PCDHGA6;PCDH15;LCP1;CDH18;PCDHGB2;PCDHA3;CDH4;HPCAL4;SCIN;FSTL5;PCDH17;EHD2;TNNT3;NCAN;FLG;C1S;CDH16;OTOF;PLCH1;SPARCL1;PLCB4…	voltage-gated cation channel activity	30	9.28453e-07	KCNQ5;KCNE2;KCNH7;CACNA1S;KCNH3;KCNC4;CNR1;KCNB1;CACNA1G;KCNT1;CACNA1D;KCNU1;CACNG7;CACNB4;GRIN2A;PKD2;KCNK2;KCNQ1;GRIN2B;GAS6;KCNQ2;CACNA1E;LRRC55;CACNA2D3;KCNC1;CACNA1A;RYR1;KCND3;KCNH1;HCN4	ATP binding	37	0.00136827	CREBBP;USP7;HTT;TP53BP1;TP53
synapse organization	282	0	PCLO;CTTNBP2;CDH8;HSPA8;SHANK3;IGSF9;DLG4;NGEF;RHOA;ITGAM;CTNNB1;ASIC2;PTEN;FBXO45;WASF2;BSN;ROBO2;GAP43;DLG2;PDLIM5;SYNPO;ADD2;PCDH17;SYNDIG1;ERBB4;ADGRB1;LRFN4;SPARCL1;CLSTN1;ADGRF1;ADGRB3;DLG5;LRRTM3;LRP4;PLXND1;PTN;DOCK10;ANK3;CDC20;ARF1;AMIGO3;FLRT3;GRIN2B;UTRN;LRRTM1;PCDHB11;L1CAM;RELN;IGF1R;AGRN;IGSF21;ADGRB2;DLGAP3;PTPRF;LRP8;CHRNB2;BCAN;NTRK1;NFASC;IL10;GNPAT;DCTN1;CTNNA2;TANC1;ZNF804A;A…	ion transmembrane transporter activity	112	1.03761e-06	KCNQ5;ABCA1;SLC24A1;SLC9C2;SLC4A7;KCNE2;KCNH7;CACNA1S;SCN1A;GRIA1;SLC24A3;SLC37A1;BEST1;ADAMTS8;KCNH3;SLC5A5;KCNC4;TRPM7;CNR1;KCNB1;CNGA1;ANO4;SLC30A8;SLC47A1;SLC2A1;SLC4A2;GRIK3;SLC8A1;GRIA2;SLC16A7;GJC1;NMUR2;TRPA1;GRIA4;CACNA1G;KCNT1;ATP1A2;CACNA1D;KCNU1;TMEM63C;CLCNKA;ITPR1;VDAC1;SLC10A2;SLC4A1;CACNG7;SCN10A;SLC7A2;SLC24A5;SLC7A5;SLC4A9;PIDD1;CHRNB4;SLC38A8;SLC3A1;PKD2L1;CACNB4;ANO3;SLC22A8;S…	sarcoplasmic reticulum calcium ion transport	4	0.0015115	TNR;GFAP;SHANK1;PTEN;ADORA2A;PRKCZ;LRRTM1;SLC24A1
ATPase activity, coupled	259	0	MYH6;FANCM;KIF1C;ABCA9;CCT8;MSH6;HSPA8;DNAH3;RALBP1;ABCA8;SPO11;DDX11;ATP2B2;PSMC1;ATP10A;RAD18;ABCB11;DYNC2H1;ATP2A1;ABCB1;SMARCA4;MYO1E;CHD4;DNAH17;MYH9;TAP1;ERCC2;CHD6;KIF5A;MSH4;ATP12A;TNNT3;ABCA7;ABCA13;DNA2;DDX23;BRIP1;ATP13A4;DNAH5;DNAH11;ABCG1;MSH3;KIF25;MOV10L1;DNAI1;ATP6V1C2;DDX54;RFC5;ATP1A3;CHTF18;CDK7;ABCA4;PBRM1;RUVBL1;MYH7;POLQ;ATP13A5;NBN;ABCD2;MYH3;RFC3;DNAH10;ATP13A2;RBBP4;ATP6V…	purine nucleotide binding	206	1.47645e-06	MYH11;TP53;GBP4;DNAH11;ABCA1;IGF1R;CTPS2;DDX3Y;DNM3;ACSBG1;KIF1C;ACSM4;NWD1;TTN;RABL6;NLRP7;HHAT;TSR1;SMC1A;RAD54L2;ACTB;AFG3L2;BMPR1A;HIPK4;ADCY10;DHX30;TRPM7;TUBB4A;CLK1;SPATA5;PRKDC;RFK;GUCY1A2;ATM;PPP5C;NLRP9;ARL13B;BRAF;CNGA1;PDE5A;DAPK1;MYH1;DNM2;CAD;NLRP12;HK1;MYO15A;DAPK3;NMNAT2;CPS1;LIG4;ATP8B4;CHST15;DYNC2H1;ACACA;SMCHD1;WNK3;CIITA;DNAH3;BMPR2;STK32B;NMUR2;EEF2K;RAB38;SCYL3;PGK2;ATP1A2;…	regulation of cAMP-dependent protein kinase activity	3	0.00168071	SLC30A2;ANK2;FKBP4;CNTN1;SCN5A;CACNA1B;ATP13A5;SLC5A12;SHANK1;PTEN;KCNT2;KCNQ2;RYR2;ADORA2A;TRPA1;SLC44A5;LRP2;GNAI2;HTT;NNT;SCN10A;CHD7;CDH23;SLC24A1;SLC12A8;SYK;AHNAK;RYR1;SLC1A5
regulation of small GTPase mediated signal transduction	244	0	ITSN2;ARHGAP9;RALGAPA2;RALBP1;PPP2CB;MFN2;NGEF;RHOA;RALGAPB;IQSEC1;GBF1;ITPKB;MET;NET1;OBSCN;EPO;ARHGAP15;KRAS;RAP1GAP;TSC2;ARHGAP20;ARHGAP36;RHOT1;INPP5B;OCRL;ARHGAP30;GARNL3;DEPDC7;GMIP;DENND4B;DGKI;PIK3R2;SPATA13;NGF;CUL3;RELN;DNM2;ARHGAP25;ARHGEF19;ARHGEF10L;VAV3;EPS8L3;CSF1;NOTCH2;ARHGEF2;NTRK1;ARHGEF11;MYOC;TGFB2;TRIM67;SIPA1L2;SOS1;STAMBP;MAP4K4;PSD4;GPR17;ARHGEF4;ALS2;GPR55;GPR35;FARP2;FG…	adenylate cyclase-inhibiting G protein-coupled glutamate receptor signaling pathway	6	1.82365e-06	GRM7;GRM3;GRIK3;GRM4;GRM8;GRM6	glutamatergic synapse	13	0.00283159	TRAF5;ZAP70;LTBR;SYK;TAB2;CD40
transmembrane transport	905	2.22045e-16	LRRC8B;KCNT2;PDE4D;LRRC55;SLC8A3;ABCA9;TRDN;AHNAK;HSPA8;ASIC1;GRIN2A;KCNJ16;CCT8L2;SHANK3;GABRP;NALCN;KCNK2;SCN7A;RALBP1;JPH2;CACNA1E;DLG4;CACNA1A;SHROOM2;SLC6A14;SLC6A6;MCOLN3;CALCR;PKD1;SLC5A10;ABCA8;ATP2B2;EIF2S1;ATP10A;NOX1;SLC22A2;SLC12A9;SLC29A2;ASIC2;KCNH6;RNF207;RYR2;ABCB11;UCP1;SLC2A5;AZIN2;PIK3R1;SLC2A12;ATP2A1;ABCB1;PTEN;DRD3;KCNH5;SLC4A3;CHRNA6;TRPM3;GRIA4;HTT;EPO;CACNG7;ITPR3;BRAF;SL…	purine ribonucleoside triphosphate binding	198	1.9034e-06	MYH11;TP53;GBP4;DNAH11;ABCA1;IGF1R;CTPS2;DDX3Y;DNM3;ACSBG1;KIF1C;ACSM4;NWD1;TTN;RABL6;NLRP7;HHAT;TSR1;SMC1A;RAD54L2;ACTB;AFG3L2;BMPR1A;HIPK4;ADCY10;DHX30;TRPM7;TUBB4A;CLK1;SPATA5;PRKDC;RFK;GUCY1A2;ATM;PPP5C;NLRP9;ARL13B;BRAF;DAPK1;MYH1;DNM2;CAD;NLRP12;HK1;MYO15A;DAPK3;NMNAT2;CPS1;LIG4;ATP8B4;DYNC2H1;ACACA;SMCHD1;WNK3;CIITA;DNAH3;BMPR2;STK32B;NMUR2;EEF2K;RAB38;SCYL3;PGK2;ATP1A2;GNAI1;BBS10;PI4KA;R…	p53 binding	5	0.00307623	NUP107;PCID2
enzyme linked receptor protein signaling pathway	624	2.22045e-16	CRIM1;GNAI2;FAT4;MYH6;AXL;SULF2;TRIM33;HRG;IGFBP3;COL4A3;NDN;MBD5;LTBP4;AKAP4;ALK;NGEF;RHOA;HIP1R;USP9X;FOXC1;HGS;EFEMP1;NCKAP1L;MET;CTNNB1;KIT;HHIP;ZNF451;ZFYVE27;SNX5;RYR2;FUT8;ELMO2;PIK3R1;PTPRU;PTEN;PTPRE;AP2A2;MYO1E;WASF2;ZBTB7B;INSRR;FAM83B;DCN;BTBD11;GH1;MEN1;ARPC5;PRKD2;EP300;POLR2B;HGF;AP2M1;APC;TSC2;PRDM16;SNX25;ERBB4;GREM2;EGFR;TGFB1;ACTG1;COL1A2;IDE;SETX;DSG4;NRG2;LRP4;BCL9L;CILP;ATP6…	ion transport	180	3.26353e-06	KCNQ5;ADRA1A;ABCA1;SLC24A1;PTPRC;AKAP6;STRA6;SLC9C2;GRM7;SLC4A7;KCNE2;KCNH7;CACNA1S;SCN1A;CAV3;GRIA1;PER1;AFG3L2;SLC24A3;SLC37A1;CDH23;BEST1;ADAMTS8;NOS1;KCNH3;SLC5A5;KCNC4;TRPM7;CNR1;KCNB1;CNGA1;DAPK1;DNM2;ANO4;SLC30A8;SLC47A1;SLC2A1;WNT3A;SLC4A2;ATP8B4;TCN1;PANX3;ACACA;WNK3;GRIK3;SLC8A1;GRIA2;SLC16A7;GJC1;SHANK1;NMUR2;GRM6;TRPA1;GRIA4;CACNA1G;ARC;KCNT1;ATP1A2;CACNA1D;EPRS;KCNU1;SHANK2;TMEM63C;C…	positive regulation of synaptic transmission	8	0.00315444	HTT;ZAP70;SYK;C10orf71
synaptic signaling	458	2.22045e-16	GNAI2;PCLO;SLC8A3;CDH8;NQO1;DCC;ASIC1;GRIN2A;SHANK3;GABRP;SYT17;CACNA1E;DLG4;CACNA1A;HTR1E;CTNNB1;KIT;SLC22A2;GAD2;ASIC2;MYCBPAP;PIP5K1C;KMO;SYT9;PTEN;DRD3;CHRNA6;BSN;MAP1A;DLGAP1;CACNG7;GAD1;ITPR3;BRAF;DLG2;SLC17A8;SV2B;EXOC4;ADCY8;P2RX1;DRD5;SYNPO;KRAS;KIF5A;GABRE;PCDH17;KCNA1;CADPS2;BLOC1S6;MPP2;ADGRB1;EGFR;OTOF;PLCB4;CLSTN1;GRM1;CDH11;NPY2R;SLC1A6;PTN;TRIM9;RHOT1;CDC20;ARF1;SLC12A6;GRIN2B;PRK…	ATP-dependent microtubule motor activity, minus-end-directed	9	3.63451e-06	DNAH11;DYNC2H1;DNAH3;DNAH8;DNHD1;DNAH1;DNAH17;DNAH5;DNAH6	cation transport	29	0.00321757	RYR2;TRPA1;RYR1
synaptic membrane	300	2.22045e-16	SLC8A3;CDH8;DCC;SYNE1;HSPA8;GRIN2A;SHANK3;GABRP;LZTS1;DLG4;HIP1R;ATP2B2;CTNNB1;CANX;GAD2;COL13A1;PTEN;DRD3;FBXO45;CHRNA6;GRIA4;DLGAP1;CACNG7;ADAM23;DLG2;PDLIM5;ADCY8;P2RX1;SEMA4F;SYNPO;CNTN6;GABRE;PCDH17;KCNA1;CADPS2;SYNDIG1;ERBB4;MPP2;ADGRB1;LRFN4;CLSTN1;DLG5;GRM1;ANK2;LRRTM3;LRP4;SLC1A6;SCN2A;ANK3;RUSC1;ARF1;FLRT3;GRIN2B;UTRN;LRRTM1;DGKI;ANK1;KCNC1;GRIA1;NCSTN;DNM2;GRIK3;CHRNG;SLC6A11;GRIP1;KLH…	regulation of synaptic transmission, glutamatergic	18	4.09966e-06	GRM7;GRM1;CNR1;GRM3;GRIK3;GRM4;GRM8;SHANK1;GRM6;ATP1A2;SHANK2;KMO;CACNG7;RELN;NRXN1;LRRK2;CUBN;ROR2	NF-kappa B signaling pathway	6	0.00328548	PRKAR1B;PRKAR1A
cation channel activity	231	5.55112e-16	KCNT2;LRRC55;ASIC1;GRIN2A;KCNJ16;CCT8L2;NALCN;KCNK2;SCN7A;JPH2;CACNA1E;CACNA1A;SHROOM2;MCOLN3;PKD1;ASIC2;KCNH6;RYR2;KCNH5;CHRNA6;TRPM3;GRIA4;CACNG7;ITPR3;HCN1;KCNJ8;P2RX1;KCNA7;CATSPER1;KCNG1;KCNA1;SCN11A;PKD1L1;ITPR2;RYR3;SCN2A;PKD1L2;TRPC5;CNGB1;SCN4A;GRIN2B;RYR1;TRPV6;KCNQ1;KCNC1;KCNH4;GRIA1;GRIK3;CHRNG;KCNK7;KCNAB2;CATSPER4;CACHD1;KCNA2;KCNA3;CHRNB2;HCN3;KCNH1;KCNK1;KCNF1;KCNH7;SCN3A;SCN1A;SC…	ion channel binding	26	4.78704e-06	AKAP6;USP10;KCNE2;PPP1R9A;CAV3;NOS1;RIMS2;KCNB1;SLC8A1;CTNNB1;VDAC1;SCN10A;CAMK2D;AKAP9;CHERP;PKD2;KCNQ1;LRRK2;CDH5;LRRC55;ABCC9;KCNC1;PKD1;PRKCSH;KCND3;KCNH1	transcription-dependent tethering of RNA polymerase II gene DNA at nuclear periphery	2	0.00331736	TNR;JAK2;CACNA1B;GFAP;SHANK1;PTEN;ADORA2A;PRKAR1B;PRKCZ;LRRTM1;GNAI2;AKAP7;SLC24A1;EPHB1
chemical synaptic transmission	449	6.66134e-16	GNAI2;PCLO;SLC8A3;CDH8;NQO1;DCC;ASIC1;GRIN2A;SHANK3;GABRP;SYT17;CACNA1E;DLG4;CACNA1A;HTR1E;CTNNB1;KIT;SLC22A2;GAD2;ASIC2;MYCBPAP;PIP5K1C;KMO;SYT9;PTEN;DRD3;CHRNA6;BSN;MAP1A;DLGAP1;CACNG7;GAD1;ITPR3;BRAF;DLG2;SLC17A8;SV2B;EXOC4;ADCY8;P2RX1;DRD5;SYNPO;KRAS;KIF5A;GABRE;PCDH17;KCNA1;CADPS2;BLOC1S6;MPP2;ADGRB1;EGFR;OTOF;PLCB4;CLSTN1;GRM1;CDH11;NPY2R;SLC1A6;PTN;TRIM9;RHOT1;CDC20;ARF1;SLC12A6;GRIN2B;PRK…	inorganic anion transmembrane transporter activity	30	7.05033e-06	SLC4A7;SLC37A1;BEST1;ADAMTS8;SLC5A5;ANO4;SLC4A2;NMUR2;CLCNKA;VDAC1;SLC4A1;SLC4A9;PIDD1;ANO3;SLC22A8;ABCC3;XPR1;GABRB2;SLC12A6;SLC26A9;SLC4A10;SLC4A8;ABCC5;ABCC9;CLCNKB;CLCA1;ANO10;SLC12A7;SLC6A3;ANO1	cAMP-dependent protein kinase regulator activity	2	0.0045978	TNR;JAK2;CACNA1B;GFAP;SHANK1;PTEN;ADORA2A;PRKAR1B;PRKCZ;LRRTM1;GNAI2;AKAP7;SLC24A1;EPHB1
GTPase binding	426	7.77156e-16	ITSN2;ATG14;MYRIP;GRIN2A;DOCK8;RIN3;RALBP1;SPTA1;ADPRH;DLG4;DENND2C;NGEF;DOCK2;RAPGEF4;IQSEC1;GBF1;GOLGA4;EXOC1;MET;RIC8A;HERC1;NOX1;YBX1;KIT;NET1;SPTB;OBSCN;DOCK5;DOCK6;DOCK11;FNIP1;RASGEF1C;BRAF;DLG2;DENND6B;LCP1;TBC1D17;EXOC4;HGF;IPO8;RAP1GAP;SBF2;TSC2;BICD1;IL3RA;ERBB4;RGPD4;EGFR;TRIOBP;RUSC2;TBC1D3I;SMCR8;NRG2;DOCK9;RAPGEF6;BICD2;LLGL2;DVL3;DOCK10;AP3M1;KNDC1;OCRL;BCAR3;GRIN2B;DENND4B;DGKI;S…	synaptic membrane	61	1.19994e-05	ADRA1A;DNM3;GRM7;CDH8;GRM1;GRIA1;SYNDIG1;RIMS2;CNR1;NSMF;KCTD8;CRYAB;KCNB1;DNM2;RGS7BP;SYNE1;GRM3;GRIK3;SLC8A1;GRIA2;GRM4;GRM8;SHANK1;GRM6;GRIA4;ARC;CACNA1D;SHANK2;PTPRO;CTNNB1;ADCY8;DDN;CNTN6;CACNG7;SYNJ1;SCN10A;CAMK2A;SYT7;UTRN;AKAP9;CHRNB4;ERC1;LRFN2;LRP4;DNM1L;GRIN2A;CHRNB2;NRP2;NRXN1;GABRB2;GRIN2B;SLC1A6;CLSTN1;NCSTN;ATP2B2;SLC6A3;APBA1;KCNC1;KCND3;KCNH1;PCDH17	modulation of chemical synaptic transmission	14	0.00477074	SLC30A2;ANK2;FKBP4;CNTN1;SCN5A;CACNA1B;SLC5A12;PTEN;KCNT2;KCNQ2;RYR2;ADORA2A;TRPA1;LRP2;GNAI2;HTT;SCN10A;CHD7;CDH23;SLC24A1;SLC12A8;AHNAK;RYR1
synapse assembly	132	1.55431e-15	PCLO;SHANK3;ASIC2;PTEN;FBXO45;BSN;ROBO2;GAP43;PDLIM5;ADD2;PCDH17;SYNDIG1;ERBB4;ADGRB1;LRFN4;CLSTN1;ADGRF1;ADGRB3;DLG5;LRRTM3;LRP4;PLXND1;AMIGO3;FLRT3;LRRTM1;PCDHB11;AGRN;ADGRB2;CHRNB2;NTRK1;GNPAT;FZD5;DNER;LRRN1;WNT7A;COLQ;WNT5A;RYK;EPHB1;CLSTN2;SLITRK3;GHSR;EIF4G1;EPHB3;ADGRL3;CDH9;MEF2C;PCDHB2;PCDHB4;PCDHB5;PCDHB13;PCDHB14;EPHA7;THBS2;SDK1;MAGI2;FZD1;PPP1R9A;NRCAM;NRG1;PTK2;PTPRD;NTNG2;GRIN1;SL…	calcium ion transmembrane transporter activity	27	1.25031e-05	SLC24A1;CACNA1S;SLC24A3;TRPM7;CNR1;SLC8A1;TRPA1;CACNA1G;CACNA1D;ITPR1;CACNG7;SLC24A5;PKD2L1;CACNB4;TRPC4;GRIN2A;TRPM4;PKD2;GRIN2B;GAS6;CACNA1E;ATP2B2;CACNA2D3;PKD1;ATP2C2;CACNA1A;RYR1	regulation of trans-synaptic signaling	14	0.00487091	TNR;GFAP;SHANK1;PTEN;ADORA2A;PRKCZ;LRRTM1;SLC24A1
small GTPase mediated signal transduction	369	3.55271e-15	ITSN2;ARHGAP9;RALGAPA2;DOCK8;TP53;RALBP1;RAB33A;PPP2CB;MFN2;NGEF;RHOA;RALGAPB;DOCK2;CTNNAL1;RAPGEF4;IQSEC1;GBF1;ITPKB;MET;NET1;VANGL2;OBSCN;DOCK5;WASF2;EPO;DOCK6;RASL10A;DOCK11;ARHGAP15;RASGEF1C;KRAS;RAP1GAP;PHACTR4;TSC2;RAB33B;RAB5C;COL1A2;ARHGAP20;DOCK9;RAPGEF6;CDH13;ARHGAP36;DOCK10;RHOT1;INPP5B;KNDC1;OCRL;BCAR3;ARHGAP30;RAB1B;GARNL3;DEPDC7;GMIP;RAB15;DENND4B;DGKI;PIK3R2;SH2D3C;SPATA13;NGF;CUL3…	inorganic anion transport	32	1.34755e-05	SLC4A7;SLC37A1;BEST1;ADAMTS8;SLC5A5;ANO4;SLC4A2;CLCNKA;VDAC1;SLC4A1;SLC4A9;PIDD1;CA2;SLC22A8;ABCC3;TG;XPR1;ENPP3;GABRB2;SLC12A6;ATF4;SLC26A9;SLC4A10;SLC4A8;ABCC5;ABCC9;CLCNKB;CLCA1;ANO10;SLC12A7;ANO1;RACGAP1	synaptic signaling	20	0.00515164	ANK2;RYR2;CHD7
transmembrane receptor protein tyrosine kinase signaling pathway	440	6.88338e-15	CRIM1;GNAI2;FAT4;AXL;SULF2;HRG;IGFBP3;COL4A3;NDN;MBD5;ALK;NGEF;RHOA;HIP1R;FOXC1;HGS;EFEMP1;NCKAP1L;MET;CTNNB1;KIT;HHIP;ZFYVE27;SNX5;ELMO2;PIK3R1;PTEN;PTPRE;AP2A2;MYO1E;WASF2;ZBTB7B;INSRR;FAM83B;DCN;GH1;ARPC5;PRKD2;POLR2B;HGF;AP2M1;APC;TSC2;ERBB4;EGFR;TGFB1;ACTG1;IDE;SETX;NRG2;CILP;ATP6V1C2;UBASH3B;BMP5;CDH13;CD8B;CEP57;FLRT3;GRIN2B;LRP1;EPHA2;FFAR3;SOCS5;HHEX;ACTR3;TRIM71;PIK3R2;GPLD1;MMP9;NGF;SM…	response to abiotic stimulus	130	1.75149e-05	USP53;TP53;PCP2;SLC24A1;ZNF516;PTPRC;STRA6;TTN;CDH8;GRM1;SMC1A;SCN1A;CAV3;PER1;XPC;RP1;BEST1;NOS1;POSTN;PRKDC;NSMF;ATM;TNFSF14;ALAS2;BRAF;CRYAB;IKBIP;CNGA1;DNM2;KDM1A;TLR8;SLC2A1;LIG4;SLC8A1;MYOF;RGS9BP;GRM6;TRPA1;EEF2K;ATP1A2;EYS;ARNT2;HSF4;KMO;ITPR1;PPARGC1A;COL1A1;SOX9;POU4F2;CUL2;HMGA2;TGFBR3;AKAP9;ADAM2;SMAD4;RUVBL2;IFI16;FMN2;PKD2L1;RAG1;BIRC2;BDKRB1;HK2;MME;RNF8;CA2;SAXO1;TEK;ANO3;DDB1;DNM…	purine ribonucleotide binding	42	0.00543288	PRKAR1B;PRKAR1A
ion channel activity	286	1.55431e-14	LRRC8B;KCNT2;LRRC55;ASIC1;GRIN2A;KCNJ16;CCT8L2;GABRP;NALCN;KCNK2;SCN7A;JPH2;CACNA1E;CACNA1A;SHROOM2;MCOLN3;PKD1;ASIC2;KCNH6;RYR2;KCNH5;CHRNA6;TRPM3;GRIA4;CACNG7;ITPR3;HCN1;KCNJ8;P2RX1;KCNA7;CLCNKA;CATSPER1;KCNG1;GABRE;KCNA1;SCN11A;PKD1L1;ITPR2;RYR3;SCN2A;PKD1L2;BEST2;TRPC5;CNGB1;SCN4A;GRIN2B;RYR1;TRPV6;KCNQ1;KCNC1;ANO4;KCNH4;GRIA1;GRIK3;CHRNG;LRRC8A;KCNK7;KCNAB2;CLCN6;CLCNKB;CATSPER4;CACHD1;CLCA4…	calcium ion transport	57	2.32654e-05	ADRA1A;SLC24A1;PTPRC;AKAP6;KCNE2;CACNA1S;CAV3;AFG3L2;SLC24A3;CDH23;BEST1;NOS1;TRPM7;WNT3A;WNK3;SLC8A1;NMUR2;GRM6;TRPA1;CACNA1G;ATP1A2;CACNA1D;CTNNB1;ITPR1;CACNG7;CAMK2A;SLC24A5;CAMK2D;PKD2L1;BDKRB1;CACNB4;TRPC4;GRIN2A;CHERP;GCG;CHRNB2;TRPM4;PKD2;PIK3CG;GRIN2B;GAS6;IBTK;RAMP3;LPAR3;CACNA1E;LIME1;THADA;TGFB1;CLCA1;ATP2B2;CACNA2D3;AHNAK;PKD1;ATP2C2;RCVRN;CACNA1A;RYR1	release of sequestered calcium ion into cytosol	6	0.00671062	CADPS2;SHANK1;CNTN6;LRRTM1
cation transport	684	2.28706e-14	KCNT2;GNAI2;PDE4D;LRRC55;SLC8A3;CLTC;TCN2;MAOB;TMBIM6;TRDN;AHNAK;ASIC1;GRIN2A;RCVRN;KCNJ16;CCT8L2;SHANK3;NALCN;KCNK2;SCN7A;SYT17;RALBP1;JPH2;CACNA1E;DLG4;RHOA;SPINK1;CACNA1A;SHROOM2;MCOLN3;CALCR;PKD1;SLC5A10;ATP2B2;CTNNB1;SLC22A2;SLC12A9;ASIC2;KCNH6;RNF207;RYR2;ABCB11;UCP1;AZIN2;SLC2A12;SYT9;ATP2A1;PTEN;CYSLTR1;DRD3;LMTK2;KCNH5;CHRNA6;TRPM3;HTT;EPO;CACNG7;CP;ITPR3;SLC17A8;TMCO3;DHRS7C;HCN1;KCNJ8;…	cation transport	128	2.54813e-05	KCNQ5;ADRA1A;SLC24A1;PTPRC;AKAP6;SLC9C2;SLC4A7;KCNE2;KCNH7;CACNA1S;SCN1A;CAV3;PER1;AFG3L2;SLC24A3;CDH23;BEST1;NOS1;KCNH3;SLC5A5;KCNC4;TRPM7;CNR1;KCNB1;CNGA1;DAPK1;DNM2;SLC30A8;SLC47A1;WNT3A;TCN1;PANX3;WNK3;SLC8A1;SHANK1;NMUR2;GRM6;TRPA1;CACNA1G;ARC;KCNT1;ATP1A2;CACNA1D;KCNU1;SHANK2;TMEM63C;CTNNB1;ITPR1;PPARGC1A;SLC10A2;CACNG7;VAMP7;SCN10A;CAMK2A;SLC7A2;SYT7;SYT10;SLC24A5;CAMK2D;UTRN;AKAP9;SLC38A8…	negative regulation of sequestering of calcium ion	6	0.00731077	ANK2;RYR2;TRPA1;HTT;CHD7;RYR1
response to endogenous stimulus	951	2.42029e-14	GNAI2;FAT4;NR3C2;PDE4D;MYH6;SLC8A3;NQO1;SULF2;MXRA5;MAOB;ITGA2;TRIM33;UFL1;CYP11B1;GRIN2A;NOD2;NR1D1;SSTR4;TP53;MBD5;LTBP4;RHOA;CACNA1A;VSTM2A;USP9X;PHOX2B;FOXC1;CALCR;CNOT1;DDX11;RUNX3;FIBIN;CTNNB1;KIT;HHIP;ZNF451;FOXA1;TAF1;RYR2;UCP1;FUT8;RARB;PIK3R1;OR51E2;PTPRU;EEF1A1;PTEN;SMARCA4;OTC;PTPRE;MED13;SOX6;KMT2D;ZFP36;DNMT3B;EPO;SOX5;DDRGK1;ROBO2;ZBTB7B;INSRR;NCOA1;BRAF;APRT;GH1;NR4A2;MEN1;HCN1;AD…	synapse organization	55	2.60038e-05	ARHGAP33;IGF1R;DNM3;CDH8;PPP1R9A;ACTB;AFG3L2;SYNDIG1;PTPRD;NFASC;LINGO2;WNT3A;SHANK1;EEF2K;ARC;LRRN3;SHANK2;PTPRO;CTNNB1;CBLN2;ITGAM;UTRN;LRFN2;WASF2;CACNB4;RELN;LRP4;DNM1L;CYFIP1;CHRNB2;NRP2;SLITRK2;NRXN1;GRIN2B;LRRK2;FCGR2B;PCDHB16;LRTM2;DSCAM;PCDHB6;AMIGO2;PCDHGC5;SDK1;CLSTN1;PDZRN3;SPARC;FZD9;ARHGAP39;TNC;CDH1;PFN1;SLITRK4;RAB39B;SLIT1;PCDH17	regulation of sequestering of calcium ion	6	0.00762497	ANK2;RYR2;TRPA1;HTT;CHD7;RYR1
GTPase activator activity	200	3.9968e-14	ARHGAP9;RGS6;RALGAPA2;SMAP2;RIN3;RALBP1;ADPRH;RALGAPB;DOCK2;NCKAP1L;RIC8A;ARHGAP15;TBC1D17;ASAP1;RAP1GAP;TSC2;RGPD4;TBC1D3I;ARHGAP20;ADGRB3;LLGL2;ARHGAP36;INPP5B;OCRL;ARHGAP30;RGS3;GARNL3;DEPDC7;GMIP;PIK3R2;ALS2CL;ARHGAP25;ALDH1A1;ERRFI1;ARHGEF19;ARHGEF10L;JUN;DEPDC1;VAV3;ARHGEF11;RGS5;RABGAP1L;RASAL2;RAB3GAP2;SIPA1L2;RGS7;RASGRP3;SOS1;TBC1D8;RGPD3;RANBP2;RAB3GAP1;AGFG1;TBC1D5;ARHGAP31;STXBP5L;KA…	synapse	132	2.67792e-05	CDH11;ARHGAP33;KPNA1;ADRA1A;DNM3;GRM7;SLC4A7;EIF4E;CDH8;IGF2BP1;GRM1;PPP1R9A;CAV3;GRIA1;ACTB;SYNDIG1;PTPRD;NOS1;NDE1;RIMS2;KCNC4;POSTN;CNR1;NSMF;SNAP47;KCTD8;CRYAB;KCNB1;DNM2;CAD;AKAP12;RPH3A;NMNAT2;BCL11A;RGS7BP;SYNE1;WNT3A;GRM3;GRIK3;SLC8A1;FGB;GRIA2;GRM4;GRM8;SHANK1;USH2A;BMPR2;KIAA1109;GRM6;GRIA4;EEF2K;ARC;ATP1A2;SOS1;CACNA1D;PLAA;PPP2R1A;SHANK2;PTPRO;CTNNB1;ADCY8;PLEKHA5;DDN;CNTN6;ITPR1;TNIK…	presynaptic membrane assembly	2	0.00772516	ANK2;RYR2;TRPA1;HTT;CHD7;RYR1
ion transmembrane transporter activity	554	5.02931e-14	LRRC8B;KCNT2;LRRC55;SLC8A3;ASIC1;GRIN2A;KCNJ16;CCT8L2;GABRP;NALCN;KCNK2;SCN7A;JPH2;CACNA1E;CACNA1A;SHROOM2;SLC6A14;SLC6A6;MCOLN3;PKD1;SLC5A10;ATP2B2;NOX1;SLC22A2;SLC12A9;ASIC2;KCNH6;RYR2;ABCB11;AZIN2;SLC2A12;ATP2A1;KCNH5;SLC4A3;CHRNA6;TRPM3;GRIA4;CACNG7;ITPR3;SLC17A8;TMCO3;HCN1;KCNJ8;P2RX1;KCNA7;CLCNKA;CATSPER1;KCNG1;GABRE;ATP12A;KCNA1;SCN11A;PKD1L1;ATP13A4;SLC22A9;SLC30A3;SLC22A3;SERINC3;SLC16A6…	synaptic transmission, glutamatergic	20	2.70362e-05	GRM7;CDH8;GRM1;CNR1;GRM3;GRIK3;GRIA2;GRM4;GRM8;SHANK1;GRM6;ATP1A2;SHANK2;KMO;CACNG7;RELN;NRXN1;LRRK2;CUBN;ROR2	anchored component of presynaptic membrane	2	0.00772516	PTEN;PTPRD
GTPase regulator activity	218	6.06182e-14	ARHGAP9;RGS6;RALGAPA2;SMAP2;RIN3;RALBP1;ADPRH;RALGAPB;DOCK2;NCKAP1L;RIC8A;ARHGAP15;TBC1D17;ASAP1;RAP1GAP;TSC2;RGPD4;TBC1D3I;ARHGAP20;ADGRB3;LLGL2;ARHGAP36;INPP5B;OCRL;ARHGAP30;RGS3;GARNL3;DEPDC7;GMIP;DGKI;PIK3R2;ALS2CL;ARHGAP25;ALDH1A1;ERRFI1;ARHGEF19;ARHGEF10L;SESN2;JUN;DEPDC1;VAV3;GPSM2;ARHGEF11;RGS5;RABGAP1L;RASAL2;RAB3GAP2;SIPA1L2;RGS7;RASGRP3;SOS1;RTKN;TBC1D8;RGPD3;RANBP2;RAB3GAP1;AGFG1;SH3B…	ATP-dependent microtubule motor activity	13	2.93436e-05	DNAH11;KIF1C;DYNC2H1;DNAH3;KIF19;DNAH8;KIF5C;DNHD1;DNAH1;DNAH17;DNAH5;DNAH6;KIF16B	cAMP-dependent protein kinase inhibitor activity	2	0.00772516	CNTN1;CNTN6
small GTPase binding	363	1.4011e-13	ITSN2;MYRIP;GRIN2A;RIN3;RALBP1;SPTA1;ADPRH;DLG4;DENND2C;NGEF;DOCK2;RAPGEF4;EXOC1;MET;NOX1;KIT;NET1;SPTB;OBSCN;DOCK11;BRAF;DLG2;DENND6B;TBC1D17;EXOC4;HGF;IPO8;RAP1GAP;SBF2;TSC2;BICD1;IL3RA;ERBB4;RGPD4;EGFR;TRIOBP;RUSC2;TBC1D3I;SMCR8;NRG2;RAPGEF6;BICD2;LLGL2;DVL3;AP3M1;KNDC1;OCRL;GRIN2B;DENND4B;DGKI;SORL1;GAS8;UNC13D;SPATA13;ALS2CL;ERRFI1;ARHGEF19;ARHGEF10L;RCC1;JAK1;LRRC7;USP33;PKN2;VAV3;EPS8L3;PI…	response to purine-containing compound	28	3.20674e-05	AKAP6;CACNA1S;PER1;SLC5A5;BRAF;CAD;KDM1A;CPS1;SLC8A1;EEF2K;DUOX2;PPARGC1A;MMP19;COL1A1;AKAP9;BIRC2;TEK;TRPM4;PKD2;PIK3CG;KCNQ1;SLC6A3;SPARC;DUSP1;RYR1;TAF1;RAPGEF1;HCN4	positive regulation of excitatory postsynaptic potential	3	0.00776161	PRKAR1B;PRKAR1A
passive transmembrane transporter activity	308	1.42442e-13	LRRC8B;KCNT2;LRRC55;ASIC1;GRIN2A;KCNJ16;CCT8L2;GABRP;NALCN;KCNK2;SCN7A;JPH2;CACNA1E;CACNA1A;SHROOM2;MCOLN3;PKD1;NOX1;ASIC2;KCNH6;RYR2;KCNH5;CHRNA6;TRPM3;GRIA4;CACNG7;ITPR3;HCN1;KCNJ8;P2RX1;KCNA7;CLCNKA;CATSPER1;KCNG1;GABRE;KCNA1;SCN11A;PKD1L1;ITPR2;RYR3;SCN2A;PKD1L2;BEST2;TRPC5;CNGB1;SCN4A;GRIN2B;RYR1;TRPV6;KCNQ1;KCNC1;ANO4;GJA5;GJA3;KCNH4;GRIA1;GRIK3;CHRNG;LRRC8A;KCNK7;AQP9;KCNAB2;CLCN6;CLCNKB;C…	calcium channel activity	24	3.33809e-05	SLC24A1;CACNA1S;SLC24A3;TRPM7;CNR1;TRPA1;CACNA1G;CACNA1D;ITPR1;CACNG7;SLC24A5;PKD2L1;CACNB4;TRPC4;GRIN2A;TRPM4;PKD2;GRIN2B;GAS6;CACNA1E;CACNA2D3;PKD1;CACNA1A;RYR1	ligand-gated calcium channel activity	3	0.00776161	RYR2;TRPA1;RYR1
regulation of ion transport	417	1.6831e-13	GNAI2;PDE4D;LRRC55;MAOB;TMBIM6;TRDN;AHNAK;RCVRN;KCNJ16;SSTR4;SHANK3;NALCN;SCN7A;SYT17;JPH2;CACNA1E;DLG4;RHOA;SPINK1;CACNA1A;CALCR;NOX1;CTNNB1;ASIC2;KCNH6;RNF207;RYR2;KMO;SYT9;ABCB1;PTEN;DRD3;KCNH5;CHRNA6;HTT;EPO;CACNG7;DHRS7C;HCN1;KCNJ8;P2RX1;KCNA7;CLCNKA;CATSPER1;PLCG2;KCNG1;GABRE;KCNA1;AVPR1A;ABCA7;SCN11A;TGFB1;CASR;LILRB1;ANK2;UBASH3B;NPY2R;PPIF;SCN2A;ANK3;ARF1;PER2;SCN4A;UTRN;PRKACA;NOS1;CCR1…	presynaptic membrane	29	3.60186e-05	ADRA1A;GRM7;RIMS2;CNR1;KCTD8;RGS7BP;GRM3;GRIK3;GRM4;GRM8;GRM6;CACNA1D;CTNNB1;ADCY8;CNTN6;SCN10A;SYT7;ERC1;DNM1L;GRIN2A;CHRNB2;NRXN1;SLC1A6;NCSTN;SLC6A3;APBA1;KCNC1;KCNH1;PCDH17	sequestering of calcium ion	6	0.00862594	ANK2;RYR2;TRPA1;HTT;CHD7;RYR1
cation transmembrane transporter activity	417	1.6831e-13	KCNT2;LRRC55;SLC8A3;ASIC1;GRIN2A;KCNJ16;CCT8L2;NALCN;KCNK2;SCN7A;JPH2;CACNA1E;CACNA1A;SHROOM2;SLC6A14;SLC6A6;MCOLN3;PKD1;SLC5A10;ATP2B2;SLC22A2;SLC12A9;ASIC2;KCNH6;RYR2;ABCB11;AZIN2;SLC2A12;ATP2A1;KCNH5;CHRNA6;TRPM3;GRIA4;CACNG7;ITPR3;TMCO3;HCN1;KCNJ8;P2RX1;KCNA7;CATSPER1;KCNG1;ATP12A;KCNA1;SCN11A;PKD1L1;ATP13A4;SLC30A3;SLC22A3;SERINC3;ITPR2;SLC15A1;RYR3;ATP6V1C2;SLC25A18;SLC1A6;SCN2A;SLC34A2;ATP…	transmembrane transport	163	3.62844e-05	KCNQ5;ABCA1;SLC24A1;PTPRC;AKAP6;STRA6;SLC9C2;SLC4A7;KCNE2;KCNH7;CACNA1S;SCN1A;CAV3;PEX5L;GRIA1;RNF5;ACTB;AFG3L2;SLC24A3;SLC37A1;BEST1;ADAMTS8;NOS1;KCNH3;SLC5A5;KCNC4;SLC25A51;TRPM7;BRAF;KCNB1;CNGA1;DAPK1;DNM2;ANO4;SLC30A8;SLC47A1;SLC2A1;WNT3A;SLC4A2;PANX3;ACACA;WNK3;GRIK3;SLC8A1;GRIA2;SLC16A7;GJC1;SHANK1;NMUR2;TRPA1;GRIA4;CACNA1G;ARC;KCNT1;ATP1A2;CACNA1D;KCNU1;SHANK2;TMEM63C;CLCNKA;ITPR1;PPARGC1A…	chemical synaptic transmission	19	0.00880347	TNR;JAK2;OR10H5;CADPS2;CACNA1B;GFAP;SHANK1;PTEN;KCNQ2;ADORA2A;PRKAR1B;PRKCZ;LRRTM1;GNAI2;GABRB1;AKAP7;SLC24A1;OR10J5;EPHB1
regulation of GTPase activity	316	2.56128e-13	ARHGAP9;RGS6;RALGAPA2;SMAP2;RRP1B;DOCK8;RIN3;RALBP1;ADPRH;NGEF;RALGAPB;DOCK2;IQSEC1;NCKAP1L;RIC8A;PLXNA4;NET1;EIF5;DOCK11;ARHGAP15;TBC1D17;ASAP1;RAP1GAP;SBF2;TSC2;RGPD4;TBC1D3I;ARHGAP20;ADGRB3;DOCK9;PLXND1;RAPGEF6;LLGL2;DVL3;ARHGAP36;DOCK10;CCL15;INPP5B;OCRL;ARHGAP30;RGS3;GARNL3;DEPDC7;EPHA2;GMIP;DGKI;PIK3R2;ALS2CL;ARHGAP25;ALDH1A1;AGRN;ERRFI1;MTOR;ARHGEF19;ARHGEF10L;WNT4;GRHL3;JUN;DEPDC1;S1PR1;V…	calcium ion transmembrane transport	44	4.56635e-05	SLC24A1;PTPRC;AKAP6;KCNE2;CACNA1S;CAV3;AFG3L2;SLC24A3;NOS1;TRPM7;WNT3A;SLC8A1;TRPA1;CACNA1G;ATP1A2;CACNA1D;ITPR1;CACNG7;SLC24A5;CAMK2D;PKD2L1;BDKRB1;CACNB4;TRPC4;GRIN2A;CHERP;TRPM4;PKD2;PIK3CG;GRIN2B;GAS6;IBTK;RAMP3;CACNA1E;LIME1;THADA;TGFB1;ATP2B2;CACNA2D3;AHNAK;PKD1;ATP2C2;CACNA1A;RYR1	calmodulin binding	8	0.00925718	SCN5A;PHKB;KCNQ2;RYR2;MYO15A;MYH7;MYH11;RYR1
Ras GTPase binding	352	2.93765e-13	ITSN2;MYRIP;GRIN2A;RIN3;RALBP1;SPTA1;ADPRH;DLG4;DENND2C;NGEF;DOCK2;RAPGEF4;EXOC1;MET;NOX1;KIT;NET1;SPTB;OBSCN;DOCK11;DLG2;DENND6B;TBC1D17;EXOC4;HGF;IPO8;RAP1GAP;SBF2;BICD1;IL3RA;ERBB4;RGPD4;EGFR;TRIOBP;RUSC2;TBC1D3I;SMCR8;NRG2;RAPGEF6;BICD2;LLGL2;DVL3;AP3M1;KNDC1;OCRL;GRIN2B;DENND4B;DGKI;GAS8;UNC13D;SPATA13;ALS2CL;ARHGEF19;ARHGEF10L;RCC1;JAK1;LRRC7;USP33;PKN2;VAV3;EPS8L3;PIFO;SRGAP2C;ARHGEF2;IQGA…	response to endogenous stimulus	172	4.61895e-05	SOX30;TP53;DSG1;EPB41L5;ADRA1A;ABCA1;IGF1R;MXRA5;TFPI;AKAP6;ACSBG1;ARID1A;EIF4E;PGR;MED12;SMC1A;PLOD3;INPPL1;CACNA1S;CAV3;ACTB;CPN1;PER1;AR;BMPR1A;NOS1;MED13;SLC5A5;POSTN;GCNT2;PRKDC;NSMF;LTBP4;PPP5C;NR1I3;BRAF;IGF2;CRYAB;KMT2D;FOXA1;DNM2;CAD;FAT4;KDM1A;APOB;FOXC1;SLC2A1;BCL11A;LTBP2;CPS1;HNF4A;ACACA;SLC8A1;FGB;BMPR2;EEF2K;FRS2;ATP1A2;SOS1;CCND3;GNAI1;ARNT2;APLP1;RAB13;GNRHR;GLG1;EPRS;PIK3R3;CTNN…	positive regulation of RNA polymerase II transcriptional preinitiation complex assembly	2	0.00956012	PSMC6;TP53
regulation of synapse structure or activity	164	4.55858e-13	CTTNBP2;CDH8;HSPA8;SHANK3;IGSF9;NGEF;RHOA;ASIC2;PTEN;ROBO2;GAP43;PDLIM5;SYNDIG1;ADGRB1;LRFN4;CLSTN1;ADGRB3;DLG5;LRRTM3;LRP4;PTN;CDC20;AMIGO3;FLRT3;GRIN2B;LRRTM1;RELN;DNM2;AGRN;ADGRB2;LRP8;CHRNB2;NTRK1;IL10;DCTN1;CTNNA2;ZNF804A;NRP2;EPHA4;LRRN1;CAMK1;WNT7A;COLQ;DAG1;SEMA3F;WNT5A;KALRN;EPHB1;CLSTN2;DHX36;SLITRK3;GHSR;EIF4G1;EPHB3;ADGRL3;SLC7A11;HOMER1;MEF2C;SYNGAP1;EPHA7;THBS2;DGKB;FZD9;FZD1;PPP1R9…	synaptic signaling	86	5.69908e-05	CDH11;KPNA1;ADRA1A;SLC24A1;GRM7;EIF4E;CDH8;GRM1;PPP1R9A;HTR1E;GRIA1;PTPRD;NOS1;RIMS2;KCNC4;CNR1;NSMF;SNAP47;BRAF;KCNB1;AKAP12;RIC3;WNT3A;GRM3;GRIK3;GRIA2;GRM4;GRM8;GJC1;SHANK1;GRM6;CACNA1G;ARC;PGK2;ATP1A2;CACNA1D;SHANK2;CTNNB1;ADCY8;KMO;CACNG7;SYNJ1;CAMK2A;SYT7;SYT10;AKAP9;CHRNB4;LRFN2;CACNB4;RELN;SYPL1;CA2;DNM1L;CYFIP1;GRIN2A;PSMC5;HTR1D;CHRNB2;NRXN1;GABRB2;GRIN2B;LRRK2;SLC12A6;KCNQ2;LPAR3;CACNA…	synapse	28	0.00988894	TNR;ANK2;JAK2;CNTN1;DISC1;CADPS2;CACNA1B;ARHGAP32;USH2A;SHANK1;ADGRV1;PTEN;CNTN6;ADORA2A;PRKAR1B;EEF1A2;PRKCZ;LRRTM1;PTPRN;HTT;PRKAR1A;SCN10A;GABRB1;EPHA7;AKAP7;PTPRD;RPH3A;EPHB1
modulation of chemical synaptic transmission	282	5.36127e-13	GNAI2;SLC8A3;DCC;ASIC1;GRIN2A;SHANK3;DLG4;CACNA1A;KIT;KMO;SYT9;PTEN;DRD3;CHRNA6;MAP1A;CACNG7;ITPR3;BRAF;ADCY8;P2RX1;DRD5;SYNPO;KRAS;PCDH17;MPP2;ADGRB1;EGFR;PLCB4;CLSTN1;GRM1;CDH11;NPY2R;PTN;RHOT1;CDC20;ARF1;GRIN2B;PRKACA;LRRTM1;NPY5R;DGKI;NGF;GRIA1;CPLX4;RELN;GRIK3;PRKCZ;TPRG1L;MTOR;NCDN;LRP8;CHRNB2;NTRK1;PTGS2;ADORA1;AGT;PRKCE;RAB3GAP1;PLCL1;EPHA4;SERPINE2;CNTN4;GRM7;SLC6A1;HRH1;WNT7A;PLCL2;CSPG…	action potential	24	7.53085e-05	USP53;ADRA1A;AKAP6;KCNE2;SCN1A;CAV3;CNR1;KCNB1;SLC8A1;GJC1;CACNA1G;ATP1A2;CACNA1D;SCN10A;CAMK2D;AKAP9;CHRNB4;CHRNB2;TRPM4;KCNQ1;PTPN3;SCN8A;KCND3;HCN4	postsynaptic membrane	11	0.0103458	ANK2;CNTN1;DISC1;CADPS2;ARHGAP32;SHANK1;PTEN;ADORA2A;LRRTM1;GABRB1;EPHA7
gated channel activity	239	5.86642e-13	KCNT2;LRRC55;ASIC1;GRIN2A;KCNJ16;CCT8L2;GABRP;NALCN;KCNK2;SCN7A;JPH2;CACNA1E;CACNA1A;SHROOM2;MCOLN3;NOX1;ASIC2;KCNH6;RYR2;KCNH5;CHRNA6;TRPM3;GRIA4;CACNG7;ITPR3;HCN1;KCNJ8;P2RX1;KCNA7;CLCNKA;CATSPER1;KCNG1;GABRE;KCNA1;SCN11A;ITPR2;RYR3;SCN2A;CNGB1;SCN4A;GRIN2B;RYR1;KCNQ1;KCNC1;ANO4;KCNH4;GRIA1;GRIK3;CHRNG;KCNK7;KCNAB2;CLCN6;CLCNKB;CATSPER4;CACHD1;CLCA4;KCNA2;KCNA3;CHRNB2;HCN3;KCNH1;KCNK1;KCNF1;KCN…	G protein-coupled glutamate receptor signaling pathway	7	8.11413e-05	GRM7;GRM1;GRM3;GRIK3;GRM4;GRM8;GRM6	positive regulation of synaptic transmission, glutamatergic	3	0.0114083	TNR;SHANK1;ADORA2A
postsynaptic membrane	224	1.54698e-12	SLC8A3;DCC;SYNE1;HSPA8;GRIN2A;SHANK3;GABRP;LZTS1;DLG4;ATP2B2;CTNNB1;CANX;COL13A1;PTEN;DRD3;FBXO45;CHRNA6;GRIA4;DLGAP1;CACNG7;DLG2;PDLIM5;P2RX1;SEMA4F;SYNPO;GABRE;PCDH17;KCNA1;CADPS2;SYNDIG1;ERBB4;ADGRB1;LRFN4;CLSTN1;DLG5;GRM1;ANK2;LRRTM3;ANK3;RUSC1;ARF1;FLRT3;GRIN2B;UTRN;LRRTM1;DGKI;ANK1;KCNC1;GRIA1;DNM2;GRIK3;CHRNG;SLC6A11;GRIP1;KLHL17;IGSF21;OPRD1;DLGAP3;SLC6A9;LRRC7;KCNA3;CHRNB2;ADORA1;KCNH1;D…	inorganic anion exchanger activity	7	8.11413e-05	SLC4A7;SLC4A2;SLC4A1;SLC4A9;SLC22A8;SLC4A10;SLC4A8	presynaptic membrane organization	2	0.0115682	ANK2;RYR2;TRPA1;HTT;CHD7;RYR1
ion gated channel activity	232	2.16538e-12	KCNT2;LRRC55;ASIC1;GRIN2A;KCNJ16;CCT8L2;GABRP;NALCN;KCNK2;SCN7A;JPH2;CACNA1E;CACNA1A;SHROOM2;MCOLN3;NOX1;ASIC2;KCNH6;RYR2;KCNH5;CHRNA6;TRPM3;GRIA4;CACNG7;ITPR3;HCN1;KCNJ8;P2RX1;KCNA7;CLCNKA;CATSPER1;KCNG1;GABRE;KCNA1;SCN11A;ITPR2;RYR3;SCN2A;CNGB1;SCN4A;GRIN2B;RYR1;KCNQ1;KCNC1;ANO4;KCNH4;GRIA1;GRIK3;CHRNG;KCNK7;KCNAB2;CLCN6;CLCNKB;CATSPER4;CACHD1;CLCA4;KCNA2;KCNA3;CHRNB2;HCN3;KCNH1;KCNK1;KCNF1;KCN…	cation transmembrane transporter activity	80	8.21331e-05	KCNQ5;SLC24A1;SLC9C2;SLC4A7;KCNE2;KCNH7;CACNA1S;SCN1A;GRIA1;SLC24A3;KCNH3;SLC5A5;KCNC4;TRPM7;CNR1;KCNB1;CNGA1;SLC30A8;SLC47A1;GRIK3;SLC8A1;GRIA2;TRPA1;GRIA4;CACNA1G;KCNT1;ATP1A2;CACNA1D;KCNU1;TMEM63C;ITPR1;SLC10A2;CACNG7;SCN10A;SLC7A2;SLC24A5;SLC4A9;CHRNB4;PKD2L1;CACNB4;TRPC4;GRIN2A;CHRNB2;TRPM4;ATP13A5;PKD2;KCNK2;KCNQ1;GRIN2B;GAS6;SLC12A6;KCNQ2;CACNA1E;CNGA4;SLC4A10;LRRC55;SLC4A8;SLC25A28;SLC1A6…	calcium ion transmembrane import into cytosol	6	0.0126424	RYR2;TRPA1;RYR1
MAPK cascade	553	4.50373e-12	SCG2;GNAI2;AXL;MAP2K3;IGFBP3;GRIN2A;NOD2;SSTR4;SHANK3;SPTA1;DLG4;ALK;FN1;FGG;CALCR;HGS;ULK4;ITPKB;MET;FBLN1;NOX1;CTNNB1;KIT;IL36RN;ZEB2;SPTB;VANGL2;SASH1;PTEN;KARS;LMTK2;PRDX1;ZFP36;EPO;CDK12;FPR1;HDAC3;INSRR;BRAF;DLG2;GH1;MEN1;ASH1L;PRKD2;HGF;KRAS;C5;FGA;TENM1;ABCA7;IL3RA;ERBB4;SORBS3;EGFR;TGFB1;PTPRC;CASR;GPNMB;MAP2K4;PRDM15;SETX;GRM1;ALOX12B;MARCO;NRG2;IL37;CFLAR;BMP5;DVL3;BMPER;NLK;CCL15;MID1…	potassium ion transmembrane transporter activity	28	8.25591e-05	KCNQ5;SLC24A1;SLC9C2;KCNE2;KCNH7;SLC24A3;KCNH3;KCNC4;KCNB1;GRIK3;KCNT1;ATP1A2;KCNU1;SLC24A5;PKD2L1;PKD2;KCNK2;KCNQ1;SLC12A6;KCNQ2;LRRC55;ABCC9;SLC12A7;KCNC1;SLC9A5;KCND3;KCNH1;HCN4	intracellular ligand-gated ion channel activity	3	0.0135432	LRRTM1;PTPRD
regulation of ion transmembrane transport	293	7.45226e-12	PDE4D;LRRC55;TRDN;AHNAK;KCNJ16;SHANK3;NALCN;SCN7A;JPH2;CACNA1E;DLG4;CACNA1A;CALCR;NOX1;ASIC2;KCNH6;RNF207;RYR2;ABCB1;PTEN;DRD3;KCNH5;HTT;EPO;CACNG7;DHRS7C;HCN1;KCNJ8;KCNA7;CLCNKA;CATSPER1;PLCG2;KCNG1;KCNA1;SCN11A;TGFB1;ANK2;UBASH3B;PPIF;SCN2A;ANK3;ARF1;PER2;SCN4A;UTRN;PRKACA;NOS1;HECW1;KCNQ1;KCNC1;PIK3CG;MMP9;GJA5;KCNH4;RELN;DNM2;HECW2;KCNK7;BDKRB1;KCNAB2;MTOR;CLCNKB;CATSPER4;SLC9A1;PCSK9;GSTM2;A…	potassium ion transport	36	9.07819e-05	KCNQ5;AKAP6;SLC9C2;KCNE2;KCNH7;CAV3;SLC24A3;NOS1;KCNH3;KCNC4;KCNB1;DNM2;WNK3;KCNT1;ATP1A2;CACNA1D;KCNU1;SLC24A5;AKAP9;PKD2L1;WNK1;KCNRG;PKD2;KCNK2;KCNQ1;SLC12A6;KCNQ2;ATF4;LRRC55;ABCC9;SLC12A7;KCNC1;SLC9A5;KCND3;KCNH1;HCN4	cellular response to purine-containing compound	2	0.0137437	CNTN1;CNTN6
transmembrane receptor protein tyrosine kinase activity	58	7.83462e-12	CRIM1;AXL;ALK;EFEMP1;MET;KIT;LMTK2;INSRR;ERBB4;EGFR;EPHA2;IGF1R;EPHA8;EPHA10;TIE1;NTRK1;DDR2;MERTK;NRP2;EPHA4;MST1R;EPHA6;RYK;EPHB1;EPHB3;FGFRL1;FGFR3;KDR;EPHA5;CSF1R;FLT4;DDR1;EPHA7;ROS1;IGF2R;EPHB6;EPHA1;TEK;ROR2;NRP1;RET;FGFR2;ERBB3;FLT3;FLT1;EFNB3;ERBB2;INSR;PDGFRB;EPHB2;MUSK;PDGFRA;NTRK3;EPHA3;EFNA3;ROR1;LTK;TYRO3	cellular ion homeostasis	78	0.000106464	ADRA1A;SLC24A1;PTPRC;PKHD1;AKAP6;SLC9C2;SLC4A7;GRM1;CAV3;GRIA1;AFG3L2;SLC24A3;CDH23;NOS1;TRPM7;CNR1;ALAS2;TTC7A;RIC3;SLC30A8;SLC4A2;SLC8A1;NMUR2;TRPA1;RAB38;ATP1A2;CACNA1D;ADCY8;ITPR1;SLC4A1;SLC24A5;CAMK2D;SLC4A9;ESR1;SMAD4;BDKRB1;GPR55;CA2;TRPC4;GRIN2A;CHERP;TRPM4;XPR1;ATP13A5;PKD2;PIK3CG;GRIN2B;LRRK2;IBTK;RAMP3;CCR9;ABCB6;DMXL2;LPAR3;LIME1;ATF4;GNB1;THADA;SLC4A10;SLC4A8;ANXA7;GNA13;TGFB1;PTGFR;…	regulation of postsynaptic density assembly	2	0.0137437	ANK2;CNTN1;DISC1;CADPS2;ARHGAP32;SHANK1;PTEN;CNTN6;ADORA2A;LRRTM1;SCN10A;GABRB1;EPHA7
cation transmembrane transport	502	1.81761e-11	KCNT2;PDE4D;LRRC55;SLC8A3;TRDN;AHNAK;ASIC1;GRIN2A;KCNJ16;CCT8L2;SHANK3;NALCN;KCNK2;SCN7A;JPH2;CACNA1E;DLG4;CACNA1A;SHROOM2;MCOLN3;CALCR;PKD1;SLC5A10;ATP2B2;SLC12A9;ASIC2;KCNH6;RNF207;RYR2;ABCB11;UCP1;SLC2A12;ATP2A1;PTEN;DRD3;KCNH5;TRPM3;HTT;EPO;CACNG7;ITPR3;TMCO3;DHRS7C;HCN1;KCNJ8;P2RX1;KCNA7;CATSPER1;PLCG2;KCNG1;ATP12A;KCNA1;SCN11A;PKD1L1;SLC30A3;TGFB1;PTPRC;PMPCA;ITPR2;SLC15A1;ANK2;RYR3;ATP6V1C…	synapse part	106	0.000132642	ARHGAP33;KPNA1;ADRA1A;DNM3;GRM7;EIF4E;CDH8;IGF2BP1;GRM1;PPP1R9A;GRIA1;ACTB;SYNDIG1;NOS1;RIMS2;KCNC4;CNR1;NSMF;SNAP47;KCTD8;CRYAB;KCNB1;DNM2;CAD;RPH3A;BCL11A;RGS7BP;SYNE1;WNT3A;GRM3;GRIK3;SLC8A1;GRIA2;GRM4;GRM8;SHANK1;USH2A;BMPR2;KIAA1109;GRM6;GRIA4;EEF2K;ARC;ATP1A2;SOS1;CACNA1D;SHANK2;PTPRO;CTNNB1;ADCY8;PLEKHA5;DDN;CNTN6;ITPR1;TNIK;CACNG7;SYNJ1;VAMP7;SCN10A;CAMK2A;SYT7;SYT10;ARFGEF2;UTRN;AKAP9;CH…	anchored component of synaptic membrane	2	0.0137437	ANK2;RYR2;HTT
positive regulation of transcription by RNA polymerase II	700	2.33125e-11	HOXD8;NFATC1;RRP1B;VGLL2;ATM;NOD2;NR1D1;RELB;SUPT20HL2;TET3;TFDP1;NDN;TP53;HOXD9;EBF1;FHL5;HEY2;PHOX2B;FOXC1;PKD1;MSGN1;MET;YBX1;CTNNB1;IFT74;FOXA1;DOT1L;TAF1;ZEB2;RARB;PIK3R1;LMX1B;HSF5;SMARCA4;DRD3;PAX6;SPI1;MED13;SOX6;KMT2D;CCNK;ZNF649;IRF6;SATB2;KMT2C;SOX5;CHP2;CDK12;DDRGK1;HDAC3;ZBTB7B;NCOA1;DCN;IRF2BPL;KDM6B;ERCC2;CHD6;SIX3;NR4A2;MEN1;HOXC4;ASH1L;PAX5;PRKD2;EP300;ZMIZ2;HGF;MED12;STAT4;ZNF76…	chemical synaptic transmission	83	0.000134769	CDH11;ADRA1A;SLC24A1;GRM7;EIF4E;CDH8;GRM1;PPP1R9A;HTR1E;GRIA1;RIMS2;KCNC4;CNR1;NSMF;SNAP47;BRAF;KCNB1;AKAP12;RIC3;WNT3A;GRM3;GRIK3;GRIA2;GRM4;GRM8;GJC1;SHANK1;GRM6;CACNA1G;ARC;PGK2;ATP1A2;CACNA1D;SHANK2;CTNNB1;ADCY8;KMO;CACNG7;SYNJ1;CAMK2A;SYT7;SYT10;AKAP9;CHRNB4;LRFN2;CACNB4;RELN;SYPL1;CA2;DNM1L;CYFIP1;GRIN2A;PSMC5;HTR1D;CHRNB2;NRXN1;GABRB2;GRIN2B;LRRK2;SLC12A6;KCNQ2;LPAR3;CACNA1E;PCDHB16;CRTC1;…	synaptic membrane	13	0.0148095	LRRTM1;PTPRD
regulation of Ras protein signal transduction	168	2.5173e-11	ITSN2;PPP2CB;MFN2;NGEF;IQSEC1;GBF1;ITPKB;MET;NET1;OBSCN;EPO;KRAS;DENND4B;DGKI;SPATA13;NGF;CUL3;DNM2;ARHGEF19;ARHGEF10L;VAV3;EPS8L3;CSF1;NOTCH2;ARHGEF2;NTRK1;ARHGEF11;MYOC;TGFB2;TRIM67;SOS1;STAMBP;MAP4K4;PSD4;GPR17;ARHGEF4;ALS2;GPR55;GPR35;FARP2;FGD5;ROBO1;KALRN;HEG1;RASA2;ARHGEF26;ECT2;MCF2L2;ARHGEF38;TRIO;FGF10;F2RL1;RASGRF2;RASA1;PSD2;ARAP3;SPRY4;ARHGEF37;SYNGAP1;ARFGEF3;ECT2L;PLEKHG1;TIAM2;CYT…	adenylate cyclase-modulating G protein-coupled receptor signaling pathway	34	0.000136926	ADGRG6;ADRA1A;ABCA1;GRM7;HTR1E;GPR37L1;NOS1;CNR1;AKAP12;GRM3;GRIK3;GRM4;GRM8;GRM6;CACNA1D;GNAI1;APLP1;ADCY8;RXFP2;WASF2;ADGRE2;HTR1D;GCG;AKAP13;RAMP3;GNB1;GNA13;PTGFR;ADRA1B;ADCY6;LGR5;PTGIR;ADGRG2;OR56A1	positive regulation of calcium ion transmembrane transporter activity	3	0.0158902	LRRTM1;PTPRD
postsynaptic specialization	231	4.81513e-11	PCLO;DCC;RPL7;HSPA8;GRIN2A;SHANK3;LZTS1;DLG4;HIP1R;ATP2B2;CTNNB1;DRD3;FBXO45;BSN;SHARPIN;DLGAP1;CACNG7;GAP43;DLG2;PDLIM5;ADCY8;SYNPO;CTNND1;ADD2;TSC2;MAP2;SYNDIG1;ERBB4;MPP2;ADGRB1;LRFN4;PLCB4;CLSTN1;DLG5;GRM1;LRRTM3;LRP4;RUSC1;ARF1;GRIN2B;LRRTM1;NOS1;DGKI;GRIA1;DNM2;MAP1B;DLGAP4;KLHL17;PRKCZ;KCNAB2;OPRD1;EPB41;DLGAP3;SLC6A9;LRP8;LRRC7;CHRNB2;ARHGEF2;ADORA1;KCNH1;DISC1;ACTN2;CHRM3;STRN;SOS1;SPTBN…	calcium channel complex	15	0.000141532	AKAP6;CACNA1S;NOS1;CACNA1G;CACNA1D;CACNG7;PKD2L1;CACNB4;TRPC4;CACNA1E;CATSPERG;CACNA2D3;PKD1;CACNA1A;RYR1	adenosine receptor signaling pathway	2	0.0160811	PSMC6;TP53
intrinsic component of synaptic membrane	125	5.12526e-11	SLC8A3;DCC;GRIN2A;CANX;DRD3;CHRNA6;CACNG7;ADAM23;ADCY8;P2RX1;CNTN6;PCDH17;KCNA1;ERBB4;LRFN4;CLSTN1;LRRTM3;SLC1A6;SCN2A;FLRT3;LRRTM1;KCNC1;GRIA1;NCSTN;SLC6A11;OPRD1;SLC6A9;KCNA2;KCNA3;SYT6;CHRNB2;CADM3;ADORA1;ATP2B4;KCNH1;PSEN2;CHRM3;SLC8A1;NRP2;EPHA4;SLC6A1;SCN10A;CSPG5;GRM2;CLSTN2;SLITRK3;GHSR;ADRA2C;CHRNA9;CDH9;RGS7BP;GLRA1;CNR1;EPHA7;STX1A;GRM3;ADAM22;NRCAM;KCND2;CHRM2;HTR5A;OPRK1;ABHD17B;NTNG…	cellular response to endogenous stimulus	146	0.000141545	TP53;EPB41L5;IGF1R;TFPI;AKAP6;ARID1A;EIF4E;PGR;MED12;SMC1A;PLOD3;CACNA1S;CAV3;ACTB;PER1;AR;BMPR1A;MED13;SLC5A5;POSTN;GCNT2;PRKDC;NSMF;LTBP4;PPP5C;NR1I3;BRAF;IGF2;KMT2D;FOXA1;DNM2;CAD;FAT4;KDM1A;APOB;FOXC1;BCL11A;LTBP2;CPS1;HNF4A;ACACA;SLC8A1;FGB;BMPR2;EEF2K;FRS2;ATP1A2;SOS1;CCND3;APLP1;RAB13;GNRHR;GLG1;EPRS;PIK3R3;CTNNB1;FGFRL1;ADCY8;FLT3;PPARGC1A;GPAM;COL1A1;SOX9;NCOA6;POU4F2;CAMK2A;RXFP2;TGFBR3…	negative regulation of metaphase/anaphase transition of cell cycle	3	0.0184513	SCN5A;SCN10A
integral component of synaptic membrane	117	7.91449e-11	SLC8A3;DCC;GRIN2A;CANX;DRD3;CHRNA6;CACNG7;ADAM23;ADCY8;P2RX1;PCDH17;KCNA1;ERBB4;LRFN4;CLSTN1;LRRTM3;SLC1A6;SCN2A;FLRT3;LRRTM1;KCNC1;GRIA1;NCSTN;SLC6A11;OPRD1;SLC6A9;KCNA2;KCNA3;SYT6;CHRNB2;CADM3;ADORA1;ATP2B4;KCNH1;PSEN2;CHRM3;SLC8A1;NRP2;EPHA4;SLC6A1;SCN10A;CSPG5;GRM2;CLSTN2;SLITRK3;GHSR;ADRA2C;CHRNA9;CDH9;GLRA1;CNR1;EPHA7;STX1A;GRM3;ADAM22;NRCAM;KCND2;CHRM2;HTR5A;OPRK1;GRIN1;NRP1;SORCS3;CHRNA10…	cellular potassium ion transport	32	0.000188401	KCNQ5;AKAP6;SLC9C2;KCNE2;KCNH7;CAV3;KCNH3;KCNC4;KCNB1;DNM2;WNK3;KCNT1;ATP1A2;CACNA1D;KCNU1;AKAP9;PKD2L1;WNK1;KCNRG;PKD2;KCNK2;KCNQ1;SLC12A6;KCNQ2;LRRC55;ABCC9;SLC12A7;KCNC1;SLC9A5;KCND3;KCNH1;HCN4	regulation of postsynaptic specialization assembly	2	0.018575	TNR;PTEN;GNAI2;SLC24A1
calcium ion transmembrane transporter activity	106	9.06522e-11	SLC8A3;GRIN2A;JPH2;CACNA1E;CACNA1A;MCOLN3;PKD1;ATP2B2;RYR2;ATP2A1;TRPM3;CACNG7;ITPR3;CATSPER1;PKD1L1;ITPR2;RYR3;PKD1L2;TRPC5;GRIN2B;RYR1;TRPV6;CATSPER4;CACHD1;ATP2B4;SLC8A1;ITPR1;CACNA2D2;CACNA2D3;LETM1;STIM2;CHRNA9;TRPC3;CATSPER3;TRPC7;CNR1;CACNA2D1;ORAI2;TRPV5;TRPA1;TMC1;TRPM6;GRIN3A;GRIN1;CACNA1B;CACNB2;PKD2L1;CHRNA10;CUL5;CACNA2D4;ATP2B1;TPCN1;TRPC4;FAM155A;RASA3;TRPM1;TRPM7;CACNA1H;ORAI3;ATP…	positive regulation of synaptic transmission	27	0.000204667	ADRA1A;SLC24A1;PPP1R9A;RIMS2;CNR1;SNAP47;BRAF;SHANK1;ARC;CACNA1D;SHANK2;ADCY8;KMO;CACNG7;SYT7;RELN;CA2;DNM1L;GRIN2A;CHRNB2;NRXN1;GRIN2B;CRTC1;CLSTN1;MAPK1;CUBN;ROR2	regulation of postsynapse assembly	2	0.018575	ANK2;CACNA1B;RYR2;ADORA2A;TRPA1;GNAI2;HTT;CHD7;CDH23;SLC24A1;AHNAK;RYR1
calcium-dependent cell-cell adhesion via plasma membrane cell adhesion molecules	45	1.03549e-10	CDH8;PCDHGB4;CDH18;CDH4;CDH16;CDH11;CDH13;CDH20;PCDHB11;SELP;SELL;CDH12;CDH9;CDH6;PCDHB2;PCDHB4;PCDHB5;PCDHB13;PCDHB14;PCDHGC3;CDH23;DCHS1;AJUBA;CDH5;CDH1;CDH15;CDH19;CDH22;CDH26;ARVCF;PCDHB9;PCDHB6;KIFAP3;PCDHB10;CDH10;CDH17;PCDHB3;CDH2;ATP2C1;NLGN1;CDHR3;CDH3;PCDHB16;CDH24;PCDH12	cellular chemical homeostasis	90	0.000210381	ADRA1A;SLC24A1;PTPRC;PKHD1;AKAP6;SLC9C2;SLC4A7;GRM1;CAV3;GRIA1;AFG3L2;SLC24A3;CDH23;NOS1;TRPM7;CNR1;ALAS2;TTC7A;KCNB1;RIC3;SLC30A8;HK1;SLC4A2;SLC8A1;NMUR2;TRPA1;RAB38;ATP1A2;CACNA1D;ADCY8;ITPR1;PPARGC1A;SLC4A1;SLC24A5;CAMK2D;SLC4A9;ESR1;SMAD4;BDKRB1;HK2;GPR55;CA2;TRPC4;GRIN2A;CHERP;GCG;GATA4;TRPM4;XPR1;ATP13A5;PKD2;PIK3CG;GRIN2B;LRRK2;GAS6;IBTK;RAMP3;CCR9;ABCB6;DMXL2;LPAR3;LIME1;ATF4;GNB1;THADA;S…	regulation of excitatory synapse assembly	2	0.018575	LRRTM1;PTPRD
asymmetric synapse	218	1.1405e-10	PCLO;DCC;RPL7;GRIN2A;SHANK3;LZTS1;DLG4;HIP1R;ATP2B2;CTNNB1;DRD3;FBXO45;BSN;SHARPIN;DLGAP1;CACNG7;GAP43;DLG2;PDLIM5;ADCY8;SYNPO;CTNND1;ADD2;TSC2;MAP2;SYNDIG1;ERBB4;MPP2;ADGRB1;LRFN4;PLCB4;CLSTN1;DLG5;GRM1;LRRTM3;LRP4;RUSC1;ARF1;GRIN2B;NOS1;DGKI;GRIA1;DNM2;MAP1B;KLHL17;PRKCZ;KCNAB2;OPRD1;EPB41;DLGAP3;SLC6A9;LRP8;LRRC7;ARHGEF2;ADORA1;KCNH1;DISC1;ACTN2;CHRM3;STRN;SOS1;SPTBN1;RTN4;BCL11A;CTNNA2;NCK2;T…	sodium ion transport	33	0.000230691	SLC24A1;SLC9C2;SLC4A7;SCN1A;CAV3;PER1;SLC24A3;NOS1;SLC5A5;DNM2;WNK3;SLC8A1;ATP1A2;SLC10A2;SCN10A;SLC24A5;CAMK2D;UTRN;SLC38A8;PKD2L1;WNK1;TRPM4;PKD2;PCSK9;SLC4A10;SLC4A8;TGFB1;SLC38A11;PTPN3;SCN8A;SLC9A5;SLC38A10;HCN4	regulation of RNA polymerase II transcriptional preinitiation complex assembly	2	0.018575	NCOR2;ZBTB7A
intrinsic component of postsynaptic membrane	96	1.28491e-10	SLC8A3;DCC;GRIN2A;CANX;DRD3;CHRNA6;CACNG7;P2RX1;PCDH17;KCNA1;ERBB4;LRFN4;CLSTN1;LRRTM3;FLRT3;LRRTM1;KCNC1;GRIA1;SLC6A11;OPRD1;SLC6A9;KCNA3;CHRNB2;ADORA1;CHRM3;SLC8A1;NRP2;EPHA4;SLC6A1;CSPG5;GRM2;CLSTN2;SLITRK3;ADRA2C;CHRNA9;CDH9;RGS7BP;GLRA1;EPHA7;GRM3;ADAM22;NRCAM;KCND2;CHRM2;HTR5A;OPRK1;ABHD17B;GRIN1;NRP1;SORCS3;CHRNA10;DAGLA;GRIK4;CLSTN3;PTPRO;CNTN1;HTR2A;PCDH8;EFNB2;GABRA5;NLGN2;CHRNB1;EFNB3;…	voltage-gated calcium channel activity	12	0.000275588	CACNA1S;CNR1;CACNA1G;CACNA1D;CACNG7;CACNB4;PKD2;GAS6;CACNA1E;CACNA2D3;CACNA1A;RYR1	voltage-gated sodium channel complex	2	0.018575	SHANK1;PTEN;PRKCZ
presynaptic membrane	121	1.29341e-10	GRIN2A;CTNNB1;CANX;GAD2;FBXO45;CHRNA6;ADAM23;ADCY8;P2RX1;CNTN6;PCDH17;KCNA1;CADPS2;ERBB4;SLC1A6;SCN2A;DGKI;KCNC1;NCSTN;GRIK3;SLC6A11;IGSF21;OPRD1;SLC6A9;KCNA2;KCNA3;CHRNB2;CADM3;ADORA1;ATP2B4;KCNH1;PSEN2;CHRM3;CTNNA2;EPHA4;GRM7;SLC6A1;SCN10A;GRM2;ERC2;EXOC3;CDH9;IL31RA;RGS7BP;GLRA1;CLTB;GRM6;GABBR1;RIMS1;CNR1;STX11;STXBP5;GPER1;STX1A;HIP1;GRM3;GRM8;CHRM2;OPRK1;RIMS2;SCRIB;UNC13B;APBA1;DENND1A;STX…	regulation of ion transmembrane transport	57	0.000295843	KCNQ5;AKAP6;KCNE2;KCNH7;CACNA1S;SCN1A;CAV3;NOS1;KCNH3;KCNC4;KCNB1;DAPK1;DNM2;WNK3;SLC8A1;SHANK1;CACNA1G;ARC;ATP1A2;CACNA1D;KCNU1;SHANK2;CLCNKA;PPARGC1A;CACNG7;SCN10A;CAMK2D;UTRN;AKAP9;MMP9;BDKRB1;CACNB4;RELN;WNK1;KCNRG;PKD2;PIK3CG;KCNQ1;KCNQ2;RAMP3;PCSK9;CACNA1E;LIME1;THADA;LRRC55;CYBB;TGFB1;CLCNKB;CACNA2D3;PTPN3;KCNC1;AHNAK;SCN8A;CACNA1A;KCND3;KCNH1;HCN4	positive regulation of GTPase activity	12	0.0198333	CACNA1B;PHKB;GRPR;RYR2;ERBB2;ADORA2A;RYR1
response to abiotic stimulus	671	1.32818e-10	H2AFX;SLC8A3;CDH8;NQO1;MSH6;ITGA2;USP47;TMBIM6;FBXO4;ATM;HYOU1;HSPA8;ASIC1;GRIN2A;RCVRN;RELB;SHANK3;KCNK2;PPL;TP53;RHOA;LIG4;TM9SF4;PKD1;RIC8A;EIF2S1;NOX1;RAD18;KIT;ASIC2;TAF1;RYR2;UCP1;DNAJC2;NET1;KMO;TTN;PIK3R1;DDB1;ABCB1;PTEN;KARS;HSF5;DRD3;BRAT1;TRPM3;DNMT3B;ATR;HTT;EPO;INSRR;TANK;BRAF;DCN;ERCC2;NR4A2;BAG1;MEN1;HSPH1;EP300;SYNPO;KRAS;METRNL;KCNA1;AVPR1A;METAP2;SAG;GRK4;PKD1L1;BRIP1;TACR3;RPTO…	anion transmembrane transporter activity	45	0.00031963	ABCA1;SLC4A7;SLC37A1;BEST1;ADAMTS8;SLC5A5;ANO4;SLC2A1;SLC4A2;SLC16A7;NMUR2;CLCNKA;VDAC1;SLC10A2;SLC4A1;SLC7A2;SLC7A5;SLC4A9;PIDD1;SLC38A8;SLC3A1;ANO3;SLC22A8;SLCO1B1;ABCC3;XPR1;GABRB2;SLC12A6;SLC26A9;SLC4A10;SLC22A7;SLC4A8;SLC1A6;ABCC5;ABCC9;CLCNKB;CLCA1;SLC38A11;ANO10;SLC12A7;SLC6A3;SLCO5A1;ANO1;SLC6A13;SLC38A10	negative regulation of synaptic transmission	4	0.0199127	ANK2;RYR2;TRPA1;HTT;CHD7;RYR1
postsynaptic density	215	1.83277e-10	PCLO;DCC;RPL7;GRIN2A;SHANK3;LZTS1;DLG4;HIP1R;ATP2B2;CTNNB1;DRD3;FBXO45;BSN;SHARPIN;DLGAP1;CACNG7;GAP43;DLG2;PDLIM5;ADCY8;SYNPO;CTNND1;ADD2;TSC2;MAP2;SYNDIG1;ERBB4;MPP2;ADGRB1;LRFN4;PLCB4;CLSTN1;DLG5;GRM1;LRRTM3;LRP4;RUSC1;ARF1;GRIN2B;NOS1;DGKI;GRIA1;DNM2;MAP1B;KLHL17;PRKCZ;KCNAB2;OPRD1;EPB41;DLGAP3;SLC6A9;LRP8;LRRC7;ARHGEF2;ADORA1;KCNH1;DISC1;ACTN2;CHRM3;STRN;SOS1;SPTBN1;RTN4;BCL11A;CTNNA2;NCK2;T…	calcium ion homeostasis	58	0.000336092	ADRA1A;SLC24A1;PTPRC;PKHD1;AKAP6;GRM1;CAV3;GRIA1;AFG3L2;SLC24A3;CDH23;NOS1;CNR1;RIC3;SLC8A1;NMUR2;TRPA1;ATP1A2;CACNA1D;ADCY8;ITPR1;SLC24A5;CAMK2D;ESR1;BDKRB1;GPR55;TRPC4;GRIN2A;CHERP;TMTC2;TRPM4;ATP13A5;PKD2;PIK3CG;GRIN2B;IBTK;RAMP3;CCR9;LPAR3;LIME1;ATF4;GNB1;THADA;ANXA7;GNA13;TGFB1;PTGFR;ATP2B2;ADRA1B;FZD9;PLCE1;PKD1;ATP2C2;CACNA1A;RYR1;PTGIR;SGCD;CCL7	calcium ion transport	12	0.020527	JAK2;FKBP4;NR4A1;NCOR2;ZBTB7A;OASL;LRP2
regulation of transmembrane transport	334	2.004e-10	PDE4D;LRRC55;TRDN;AHNAK;KCNJ16;SHANK3;NALCN;SCN7A;JPH2;CACNA1E;DLG4;CACNA1A;CALCR;NOX1;ASIC2;KCNH6;RNF207;RYR2;AZIN2;PIK3R1;ABCB1;PTEN;DRD3;KCNH5;HTT;EPO;CACNG7;BRAF;DHRS7C;GH1;HCN1;KCNJ8;KCNA7;CLCNKA;CATSPER1;PLCG2;KCNG1;KCNA1;SCN11A;TGFB1;ANK2;UBASH3B;PPIF;SCN2A;ANK3;ARF1;PER2;SCN4A;UTRN;PRKACA;NOS1;HECW1;KCNQ1;KCNC1;PIK3CG;MMP9;GJA5;KCNH4;RELN;DNM2;HECW2;PRKAG2;KCNK7;BDKRB1;KCNAB2;MTOR;RSC1A1;…	intrinsic component of presynaptic membrane	17	0.000350634	ADRA1A;CNR1;RGS7BP;GRM3;CACNA1D;ADCY8;CNTN6;SCN10A;SYT7;CHRNB2;NRXN1;SLC1A6;NCSTN;SLC6A3;KCNC1;KCNH1;PCDH17	regulation of postsynaptic density organization	2	0.0212203	ANK2;CACNA1B;RYR2;ADORA2A;GNAI2;HTT;CHD7;AHNAK
transmembrane signaling receptor activity	718	2.12348e-10	CRIM1;OR51A4;AXL;CR2;ITGA2;DCC;OR52L1;GRIN2A;SIGLEC8;SSTR4;GABRP;OR10C1;OR2J2;LTBP4;ALK;P2RY14;B9D1;CALCR;PKD1;EFEMP1;ITGAL;CD79A;FPR3;HTR1E;MET;OR10J3;KIT;ADGRF4;PLXNA4;GPR158;OR2T12;XCR1;ADGRA3;CD72;OR10Z1;OR51E2;OR9I1;PTPRU;OR6N1;CYSLTR1;DRD3;LMTK2;PTPRE;OR4C12;PTPRH;OR2M4;CHRNA6;GRIA4;OR52J3;PPAN-P2RY11;FPR1;ROBO2;OR5K3;INSRR;P2RX1;DRD5;PROKR2;OR5L1;GABRE;OR10G8;OR6K3;IL18RAP;GLP1R;AVPR1A;ABC…	cellular calcium ion homeostasis	56	0.000462559	ADRA1A;SLC24A1;PTPRC;PKHD1;AKAP6;GRM1;CAV3;GRIA1;AFG3L2;SLC24A3;CDH23;NOS1;CNR1;RIC3;SLC8A1;NMUR2;TRPA1;ATP1A2;CACNA1D;ADCY8;ITPR1;SLC24A5;CAMK2D;ESR1;BDKRB1;GPR55;TRPC4;GRIN2A;CHERP;TRPM4;ATP13A5;PKD2;PIK3CG;GRIN2B;IBTK;RAMP3;CCR9;LPAR3;LIME1;ATF4;GNB1;THADA;ANXA7;GNA13;TGFB1;PTGFR;ATP2B2;ADRA1B;FZD9;PLCE1;PKD1;ATP2C2;CACNA1A;RYR1;PTGIR;CCL7	negative regulation of androgen receptor signaling pathway	2	0.0212203	ANK2;RYR2;TRPA1;HTT;CHD7;RYR1
ion channel complex	205	2.68437e-10	LRRC8B;PDE4D;LRRC55;GRIN2A;KCNJ16;SHANK3;GABRP;KCNK2;SCN7A;CACNA1E;DLG4;CACNA1A;PKD1;RYR2;ATP2A1;CHRNA6;GRIA4;CPT1C;CACNG7;DLG2;HCN1;KCNJ8;KCNA7;CLCNKA;CATSPER1;KCNG1;GABRE;KCNA1;SCN11A;PKD1L1;CATSPERD;RYR3;SCN2A;BEST2;TRPC5;CNGB1;SCN4A;GRIN2B;PRKACA;RYR1;NOS1;KCNQ1;KCNC1;ABHD12;KCNH4;GRIA1;GRIK3;CHRNG;LRRC8A;KCNAB2;CLCNKB;CATSPER4;CACHD1;LRRC7;LRRC8C;LRRC8D;KCNA2;KCNA3;CHRNB2;KCNH1;KCNK1;KCNF1;S…	voltage-gated calcium channel complex	11	0.000482722	CACNA1S;NOS1;CACNA1G;CACNA1D;CACNG7;CACNB4;CACNA1E;CATSPERG;CACNA2D3;CACNA1A;RYR1	modulation of excitatory postsynaptic potential	3	0.0212279	SPTA1;JAK2;CUL3;PTEN;ERBB2;QARS;PRKCZ;BMP10;ZEB2;GNAI2;KBTBD7;EPHA7;CSF1R;LTBR;SPTB;CSF2RA;EPHB1;BMP3;SYK;TAB2;CD40
integral component of postsynaptic membrane	92	3.34482e-10	SLC8A3;DCC;GRIN2A;CANX;DRD3;CHRNA6;CACNG7;P2RX1;PCDH17;KCNA1;ERBB4;LRFN4;CLSTN1;LRRTM3;FLRT3;LRRTM1;KCNC1;GRIA1;SLC6A11;OPRD1;SLC6A9;KCNA3;CHRNB2;ADORA1;CHRM3;SLC8A1;NRP2;EPHA4;SLC6A1;CSPG5;GRM2;CLSTN2;SLITRK3;ADRA2C;CHRNA9;CDH9;GLRA1;EPHA7;GRM3;ADAM22;NRCAM;KCND2;CHRM2;HTR5A;OPRK1;GRIN1;NRP1;SORCS3;CHRNA10;DAGLA;GRIK4;CLSTN3;PTPRO;HTR2A;PCDH8;EFNB2;GABRA5;NLGN2;CHRNB1;EFNB3;SLC6A4;CACNG4;NETO1;P…	regulation of postsynaptic cytosolic calcium ion concentration	5	0.000617406	GRM1;GRIA1;ITPR1;ATP2B2;FZD9	Calcium signaling pathway	7	0.0220884	PSMC6;TP53
cation channel complex	156	3.3558e-10	PDE4D;LRRC55;GRIN2A;KCNJ16;KCNK2;SCN7A;CACNA1E;DLG4;CACNA1A;PKD1;RYR2;ATP2A1;GRIA4;CPT1C;CACNG7;DLG2;HCN1;KCNJ8;KCNA7;CATSPER1;KCNG1;KCNA1;SCN11A;PKD1L1;CATSPERD;RYR3;SCN2A;TRPC5;CNGB1;SCN4A;GRIN2B;PRKACA;RYR1;NOS1;KCNQ1;KCNC1;ABHD12;KCNH4;GRIA1;GRIK3;KCNAB2;CATSPER4;CACHD1;KCNA2;KCNA3;KCNH1;KCNK1;KCNF1;SCN3A;SCN1A;SCN9A;SCN10A;SACM1L;CACNA2D2;CACNA2D3;KCNAB1;KCNMB2;TRPC3;CATSPER3;TRPC7;STX1A;CAC…	voltage-gated potassium channel activity	17	0.000618188	KCNQ5;KCNE2;KCNH7;KCNH3;KCNC4;KCNB1;KCNT1;KCNU1;PKD2;KCNK2;KCNQ1;KCNQ2;LRRC55;KCNC1;KCND3;KCNH1;HCN4	calcium ion transport into cytosol	6	0.0222059	SCN5A;SCN10A
regulation of MAPK cascade	458	7.20541e-10	GNAI2;AXL;MAP2K3;IGFBP3;NOD2;SSTR4;ALK;FN1;FGG;CALCR;HGS;ULK4;MET;FBLN1;NOX1;CTNNB1;KIT;IL36RN;ZEB2;VANGL2;SASH1;PTEN;KARS;LMTK2;PRDX1;EPO;CDK12;FPR1;HDAC3;INSRR;BRAF;GH1;MEN1;ASH1L;PRKD2;HGF;KRAS;C5;FGA;TENM1;ABCA7;ERBB4;SORBS3;EGFR;TGFB1;PTPRC;GPNMB;MAP2K4;PRDM15;GRM1;ALOX12B;MARCO;IL37;CFLAR;BMP5;DVL3;BMPER;CCL15;MID1;REN;RGS3;EPHA2;CCR1;NPY5R;SORL1;PIK3R2;PIK3CG;NGF;ERP29;IGF1R;FZD4;PRKCZ;TP7…	Cholinergic synapse	20	0.000623518	KCNQ5;CACNA1S;CACNA1D;GNAI1;PIK3R3;ADCY8;ITPR1;CAMK2A;CAMK2D;CHRNB4;CHRNB2;PIK3CG;KCNQ1;KCNQ2;ATF4;GNB1;PIK3CA;ADCY6;CACNA1A;MAPK1	regulation of calcium ion transport	8	0.0242042	ANK2;CACNA1B;RYR2;TRPA1;HTT;CHD7;SLC24A1;AHNAK;RYR1
cellular response to organonitrogen compound	351	7.60394e-10	GNAI2;PDE4D;SLC8A3;CYP11B1;GRIN2A;NOD2;TP53;MBD5;CACNA1A;DDX11;CTNNB1;TAF1;RYR2;PIK3R1;PTEN;PTPRE;ZBTB7B;INSRR;APRT;GH1;NR4A2;MEN1;HCN1;ADCY8;DRD5;APC;GLP1R;TSC2;BRIP1;RPTOR;EGFR;TGFB1;CASR;COL1A2;IDE;ITPR2;RYR3;CDC5L;ATP6V1C2;CFLAR;ATP1A3;LRP1;PRKACA;FFAR3;RYR1;KCNQ1;BRCA1;PIK3R2;GPLD1;PIK3CG;ZFP36L1;SMARCC1;IGF1R;DNM2;PIK3CA;AQP9;CEBPB;PRKCZ;ERRFI1;MTOR;KDM1A;SLC9A1;SESN2;COL16A1;ATP6V0B;PCSK9;…	synapse assembly	26	0.000714088	DNM3;PPP1R9A;SYNDIG1;PTPRD;LINGO2;WNT3A;SHANK1;EEF2K;LRRN3;SHANK2;CBLN2;LRP4;CHRNB2;SLITRK2;NRXN1;PCDHB16;LRTM2;DSCAM;PCDHB6;AMIGO2;SDK1;CLSTN1;CDH1;SLITRK4;SLIT1;PCDH17	Golgi vesicle transport	11	0.0248218	ANK2;RYR2;HTT;AHNAK
regulation of stress-activated MAPK cascade	160	1.2123e-09	NOD2;ULK4;NOX1;IL36RN;ZEB2;VANGL2;SASH1;KARS;PRDX1;HDAC3;MEN1;HGF;EGFR;MAP2K4;IL37;DVL3;MID1;IGF1R;FZD4;MUL1;MAP3K6;TGFBR3;MAGI3;PTPN22;TGFB2;XDH;MAP4K4;IL36A;MAP3K2;DUSP19;FZD7;FZD5;EPHA4;STK25;WNT7A;WNT5A;EPHB1;MECOM;MAP3K13;DLG1;PPEF2;F2RL1;FLT4;RIPK1;DTNBP1;UNC5CL;MAP3K4;NOD1;MDFIC;LEP;KLHDC10;HIPK2;ARHGEF5;MFHAS1;PBK;OPRK1;GDF6;DNAJA1;SYK;ROR2;AMBP;TLR4;DAB2IP;RAPGEF1;CARD9;TRAF2;ERCC6;TRAF6…	regulation of cytosolic calcium ion concentration	45	0.000843558	ADRA1A;PTPRC;AKAP6;GRM1;CAV3;GRIA1;CDH23;NOS1;CNR1;RIC3;SLC8A1;NMUR2;TRPA1;ATP1A2;CACNA1D;ADCY8;ITPR1;CAMK2D;ESR1;BDKRB1;GPR55;TRPC4;GRIN2A;CHERP;TRPM4;PKD2;PIK3CG;GRIN2B;IBTK;RAMP3;CCR9;LPAR3;LIME1;GNB1;GNA13;TGFB1;PTGFR;ATP2B2;ADRA1B;FZD9;PLCE1;PKD1;CACNA1A;RYR1;PTGIR	GTPase activator activity	9	0.0252266	SLC30A2;SCN5A;CACNA1B;SLC5A12;KCNT2;KCNQ2;RYR2;TRPA1;SCN10A;SLC24A1;SLC12A8;RYR1
positive regulation of MAPK cascade	345	1.23445e-09	GNAI2;AXL;MAP2K3;IGFBP3;NOD2;SSTR4;ALK;FGG;CALCR;MET;NOX1;CTNNB1;KIT;IL36RN;ZEB2;VANGL2;SASH1;PTEN;KARS;LMTK2;EPO;FPR1;INSRR;BRAF;GH1;PRKD2;HGF;KRAS;C5;FGA;TENM1;ABCA7;ERBB4;SORBS3;EGFR;TGFB1;PTPRC;GPNMB;MAP2K4;GRM1;ALOX12B;MARCO;IL37;CFLAR;DVL3;BMPER;CCL15;MID1;EPHA2;CCR1;NPY5R;PIK3CG;NGF;ERP29;IGF1R;FZD4;PRKCZ;TP73;PLA2G5;MUL1;EPHA8;MAP3K6;EPHA10;TIE1;JUN;LPAR3;PROK1;PTPN22;NOTCH2;IQGAP3;NTRK1;…	sodium ion transmembrane transport	23	0.000858593	SLC24A1;SLC9C2;SCN1A;CAV3;SLC24A3;NOS1;DNM2;WNK3;SLC8A1;ATP1A2;SCN10A;SLC24A5;CAMK2D;UTRN;PKD2L1;WNK1;TRPM4;PKD2;PCSK9;PTPN3;SCN8A;SLC9A5;HCN4	regulation of release of sequestered calcium ion into cytosol	4	0.0262343	CACNA1B;RYR2;TRPA1;SLC24A1;RYR1
Ras guanyl-nucleotide exchange factor activity	176	1.46604e-09	ITSN2;GRIN2A;RIN3;SPTA1;DLG4;DENND2C;NGEF;DOCK2;RAPGEF4;MET;KIT;NET1;SPTB;OBSCN;DOCK11;DLG2;DENND6B;HGF;SBF2;IL3RA;ERBB4;EGFR;SMCR8;NRG2;KNDC1;GRIN2B;DENND4B;SPATA13;ALS2CL;ARHGEF19;ARHGEF10L;RCC1;JAK1;LRRC7;VAV3;EPS8L3;ARHGEF2;ARHGEF11;RGL1;DENND1B;RAB3GAP2;ACTN2;TRAPPC12;RASGRP3;SOS1;SPTBN1;ARHGEF4;RAB3GAP1;ALS2;IRS1;FARP2;FGD5;KALRN;ARHGEF26;ECT2;MCF2L2;DLG1;FGFR3;KLB;ARHGEF38;EGF;CAMK2D;FGF2;…	intrinsic component of synaptic membrane	26	0.000859283	ADRA1A;GRIA1;CNR1;RGS7BP;GRM3;SLC8A1;CACNA1D;PTPRO;ADCY8;CNTN6;CACNG7;SCN10A;SYT7;GRIN2A;CHRNB2;NRP2;NRXN1;GABRB2;SLC1A6;CLSTN1;NCSTN;SLC6A3;KCNC1;KCND3;KCNH1;PCDH17	multicellular organismal response to stress	4	0.0262343	SLC30A2;SCN5A;CACNA1B;ATP13A5;SLC5A12;KCNT2;KCNQ2;RYR2;TRPA1;SLC44A5;NNT;SCN10A;SLC24A1;SLC12A8;RYR1;SLC1A5
stress-activated MAPK cascade	188	2.17769e-09	MAP2K3;NOD2;ULK4;NOX1;IL36RN;ZEB2;VANGL2;SASH1;KARS;PRDX1;ZFP36;HDAC3;MEN1;HGF;EGFR;CASR;MAP2K4;IL37;DVL3;MID1;SH2D3C;ZFP36L1;IGF1R;FZD4;MUL1;MAP3K6;TGFBR3;MAGI3;PTPN22;TGFB2;AGT;XDH;MAP4K4;IL36A;MAP3K2;DUSP19;FZD7;FZD5;EPHA4;STK25;IRAK2;WNT7A;WNT5A;EPHB1;MECOM;MAP3K13;DLG1;TNIP2;PPEF2;NFKB1;PTGER4;F2RL1;SKP1;FLT4;RIPK1;DTNBP1;MAPK13;UNC5CL;MAP3K4;NOD1;CCM2;MDFIC;LEP;KLHDC10;HIPK2;ARHGEF5;CUL1;MF…	calcium ion import	15	0.000870578	CACNA1S;CAV3;AFG3L2;WNK3;SLC8A1;GRM6;CACNA1G;CACNA1D;CTNNB1;TRPC4;GCG;PKD2;RAMP3;CACNA1E;CACNA1A	regulation of RIG-I signaling pathway	2	0.0269441	CNTN1;CNTN6;ADORA2A;SCN10A
regulation of synapse assembly	82	2.40351e-09	ASIC2;ROBO2;GAP43;PDLIM5;SYNDIG1;ADGRB1;LRFN4;CLSTN1;ADGRB3;DLG5;LRRTM3;AMIGO3;FLRT3;LRRTM1;AGRN;ADGRB2;CHRNB2;NTRK1;LRRN1;WNT7A;COLQ;WNT5A;EPHB1;CLSTN2;SLITRK3;GHSR;EIF4G1;EPHB3;ADGRL3;MEF2C;EPHA7;THBS2;FZD1;PPP1R9A;PTK2;PTPRD;NTNG2;GRIN1;SLIT1;BDNF;FLRT1;CLSTN3;CUX2;SLITRK6;EEF2K;NLGN2;PTPRS;ADGRL1;LRFN3;NLGN3;BHLHB9;SLITRK2;MECP2;LRRC4B;GRID2;SLITRK5;IL1RAPL2;TLR2;LRRC24;EPHB2;VPS35;MUSK;WNT3A…	sodium ion transmembrane transporter activity	24	0.000893807	SLC24A1;SLC9C2;SLC4A7;SCN1A;SLC24A3;SLC5A5;GRIK3;SLC8A1;ATP1A2;SLC10A2;SCN10A;SLC24A5;SLC4A9;PKD2L1;TRPM4;PKD2;SLC4A10;SLC4A8;SLC1A6;SLC6A3;SLC6A13;SCN8A;SLC9A5;HCN4	postsynaptic cytosol	2	0.0269441	SHANK1;PTEN;LRRTM1;EPHA7;PTPRD;EPHB1
voltage-gated ion channel activity	140	3.43915e-09	KCNT2;LRRC55;GRIN2A;KCNJ16;NALCN;KCNK2;SCN7A;CACNA1E;CACNA1A;NOX1;KCNH6;KCNH5;CACNG7;HCN1;KCNJ8;KCNA7;CLCNKA;CATSPER1;KCNG1;KCNA1;SCN11A;SCN2A;SCN4A;GRIN2B;RYR1;KCNQ1;KCNC1;KCNH4;KCNK7;KCNAB2;CLCN6;CLCNKB;CATSPER4;CACHD1;KCNA2;KCNA3;HCN3;KCNH1;KCNK1;KCNF1;KCNH7;SCN3A;SCN1A;SCN9A;KCNH8;SCN10A;CACNA2D2;CACNA2D3;KCNAB1;CLCN2;REST;CATSPER3;CNR1;CACNA2D1;KCND2;CLCN1;KCNH2;KCNU1;KCNS2;KCNQ3;TMC1;GRIN3A…	positive regulation of biomineral tissue development	11	0.000894011	NELL1;BMPR1A;SLC8A1;BMPR2;TMEM119;ADGRV1;ATF4;TGFB1;ISG15;ACVR2A;FZD9	vesicle transport along microtubule	3	0.029114	ANK2;SCN5A;RYR2;HTT;SCN10A
voltage-gated channel activity	140	3.43915e-09	KCNT2;LRRC55;GRIN2A;KCNJ16;NALCN;KCNK2;SCN7A;CACNA1E;CACNA1A;NOX1;KCNH6;KCNH5;CACNG7;HCN1;KCNJ8;KCNA7;CLCNKA;CATSPER1;KCNG1;KCNA1;SCN11A;SCN2A;SCN4A;GRIN2B;RYR1;KCNQ1;KCNC1;KCNH4;KCNK7;KCNAB2;CLCN6;CLCNKB;CATSPER4;CACHD1;KCNA2;KCNA3;HCN3;KCNH1;KCNK1;KCNF1;KCNH7;SCN3A;SCN1A;SCN9A;KCNH8;SCN10A;CACNA2D2;CACNA2D3;KCNAB1;CLCN2;REST;CATSPER3;CNR1;CACNA2D1;KCND2;CLCN1;KCNH2;KCNU1;KCNS2;KCNQ3;TMC1;GRIN3A…	detection of abiotic stimulus	22	0.000904668	PCP2;TTN;SCN1A;CAV3;RP1;BEST1;CNGA1;RGS9BP;GRM6;TRPA1;EYS;PKD2L1;ANO3;CCDC66;PKD2;ADGRV1;ABCA4;GNB1;SAG;ANO1;PKD1;RCVRN	cytosolic calcium ion transport	6	0.0313196	ANK2;RYR2
Ras protein signal transduction	281	3.51454e-09	ITSN2;TP53;RAB33A;PPP2CB;MFN2;NGEF;RHOA;CTNNAL1;IQSEC1;GBF1;ITPKB;MET;NET1;VANGL2;OBSCN;WASF2;EPO;KRAS;PHACTR4;RAB33B;RAB5C;COL1A2;RAPGEF6;CDH13;RHOT1;RAB1B;RAB15;DENND4B;DGKI;SPATA13;NGF;CUL3;DNM2;ARHGEF19;ARHGEF10L;CNKSR1;JUN;VAV3;GPSM2;EPS8L3;CSF1;NOTCH2;SETDB1;RAB13;ARHGEF2;RAB25;IQGAP3;NTRK1;ARHGEF11;MYOC;TGFB2;TRIM67;ROCK2;RASGRP3;SOS1;STAMBP;RTKN;MAP4K4;PSD4;GPR17;ARHGEF4;NCKAP1;ALS2;GPR55…	G protein-coupled receptor signaling pathway, coupled to cyclic nucleotide second messenger	35	0.00103423	ADGRG6;ADRA1A;ABCA1;GRM7;HTR1E;GPR37L1;NOS1;CNR1;AKAP12;GRM3;GRIK3;GRM4;GRM8;GRM6;CACNA1D;GNAI1;APLP1;ADCY8;RXFP2;WASF2;ADGRE2;HTR1D;GCG;AKAP13;RAMP3;LPAR3;GNB1;GNA13;PTGFR;ADRA1B;ADCY6;LGR5;PTGIR;ADGRG2;OR56A1	MAPK cascade	21	0.0330893	PTEN;EPHA7
calcium ion transmembrane transport	196	6.31805e-09	PDE4D;SLC8A3;TRDN;AHNAK;ASIC1;GRIN2A;NALCN;JPH2;CACNA1E;CACNA1A;MCOLN3;CALCR;PKD1;ATP2B2;RYR2;ATP2A1;TRPM3;HTT;CACNG7;ITPR3;DHRS7C;CATSPER1;PLCG2;PKD1L1;TGFB1;PTPRC;PMPCA;ITPR2;ANK2;RYR3;UBASH3B;PKD1L2;TRPC5;GRIN2B;PRKACA;RYR1;NOS1;TRPV6;PIK3CG;BDKRB1;CATSPER4;SLC9A1;CACHD1;GSTM2;ATP2B4;GJC2;EHD3;SLC8A1;THADA;PRKCE;DYSF;GPR35;ITPR1;STAC;CCR5;CACNA2D2;CACNA2D3;LETM1;STIM2;CHRNA9;CXCL9;CXCL10;CAMK2…	outward rectifier potassium channel activity	6	0.00110012	KCNT1;KCNU1;PKD2;KCNK2;KCNQ1;KCND3	positive regulation of transcription initiation from RNA polymerase II promoter	2	0.0332129	ZEB2;KIF13A;TYRP1
DNA-dependent ATPase activity	70	7.33604e-09	FANCM;MSH6;SPO11;DDX11;RAD18;SMARCA4;CHD4;ERCC2;CHD6;MSH4;DNA2;BRIP1;MSH3;RFC5;CHTF18;CDK7;PBRM1;RUVBL1;POLQ;NBN;RFC3;RBBP4;DHX30;DHX36;RFC1;RAD17;CHD1;GTF2H4;WRN;RECQL4;SMARCA2;ERCC6;IGHMBP2;HELB;CHD8;RAD51B;RAD51;CHD2;TOP2A;BPTF;RUVBL2;RTEL1;DDX3X;RAD54B;ATRX;SMARCAL1;GTF2H3;XRCC2;DSCC1;SMARCA1;CHD3;ERCC6L;ASCC3;BLM;TTF2;XRCC6;MCM7;CCNH;MSH5;RAD51D;TOP2B;RECQL5;RAD51C;INO80;CHD1L;RECQL;ERCC8;GT…	inorganic ion transmembrane transport	90	0.0011837	KCNQ5;SLC24A1;PTPRC;AKAP6;SLC9C2;KCNE2;KCNH7;CACNA1S;SCN1A;CAV3;AFG3L2;SLC24A3;SLC37A1;BEST1;ADAMTS8;NOS1;KCNH3;KCNC4;TRPM7;KCNB1;DNM2;SLC30A8;WNT3A;WNK3;SLC8A1;TRPA1;CACNA1G;KCNT1;ATP1A2;CACNA1D;KCNU1;CLCNKA;ITPR1;SLC4A1;CACNG7;SCN10A;SLC24A5;CAMK2D;UTRN;AKAP9;PKD2L1;BDKRB1;CACNB4;WNK1;TRPC4;GRIN2A;CHERP;KCNRG;TRPM4;XPR1;PKD2;PIK3CG;KCNK2;GABRB2;KCNQ1;GRIN2B;GAS6;SLC12A6;KCNQ2;IBTK;RAMP3;PCSK9;C…	voltage-gated sodium channel activity	2	0.0332129	SLC30A2;ANK2;SCN5A;CACNA1B;SHANK1;PTEN;KCNT2;KCNQ2;RYR2;TRPA1;HTT;NNT;SCN10A;CHD7;SLC24A1;SLC12A8;AHNAK;RYR1;SLC1A5
calcium ion homeostasis	288	1.19854e-08	PDE4D;SLC8A3;TMBIM6;TRDN;GRIN2A;JPH2;DLG4;CACNA1A;MCOLN3;CALCR;PKD1;FPR3;ATP2B2;RYR2;XCR1;ATP2A1;CYSLTR1;DRD3;HTT;EPO;FPR1;ITPR3;DHRS7C;ADCY8;P2RX1;DRD5;SYNPO;PLCG2;GLP1R;AVPR1A;ATP13A4;TGFB1;PTPRC;CASR;GPR32;GRM1;ITPR2;ANK2;RYR3;UBASH3B;NPY2R;CCL15;S1PR4;TRPC5;CNGB1;CCRL2;GRIN2B;PRKACA;RYR1;NOS1;ACKR2;CCR1;TRPV6;PIK3CG;ATP13A5;GRIA1;BDKRB1;GPR157;ATP13A2;LPAR3;S1PR1;GSTM2;SV2A;S100A14;ADORA1;ATP…	cation transmembrane transport	90	0.00127622	KCNQ5;SLC24A1;PTPRC;AKAP6;SLC9C2;KCNE2;KCNH7;CACNA1S;SCN1A;CAV3;AFG3L2;SLC24A3;NOS1;KCNH3;KCNC4;TRPM7;KCNB1;CNGA1;DAPK1;DNM2;SLC30A8;WNT3A;WNK3;SLC8A1;SHANK1;TRPA1;CACNA1G;ARC;KCNT1;ATP1A2;CACNA1D;KCNU1;SHANK2;ITPR1;PPARGC1A;CACNG7;SCN10A;SLC7A2;SLC24A5;CAMK2D;UTRN;AKAP9;MMP9;PKD2L1;BDKRB1;CACNB4;RELN;WNK1;TRPC4;GRIN2A;CHERP;KCNRG;TRPM4;PKD2;PIK3CG;KCNK2;KCNQ1;GRIN2B;GAS6;SLC12A6;KCNQ2;IBTK;RAMP3…	transmembrane receptor protein kinase activity	4	0.0349728	CNTN1;CNTN6;ADORA2A;LRRTM1;SCN10A;EPHA7
regulation of cellular response to stress	401	1.31259e-08	AKT3;SETD2;H2AFX;USP47;TMBIM6;FBXO4;ATM;HYOU1;HSPA8;NOD2;KCNK2;ULK4;DDX11;MET;NOX1;CTNNB1;IL36RN;ZEB2;DNAJC2;FUT8;VANGL2;PIK3R1;SASH1;PTEN;KARS;PYHIN1;PRDX1;SZT2;ATR;EPO;HDAC3;ZBTB7B;BRAF;WDR70;BAG1;MEN1;ADCY8;HSPH1;EP300;HGF;KRAS;ARMT1;RPTOR;EGFR;SERINC3;SMYD2;MAP2K4;TP53BP1;IL37;SFPQ;DVL3;MID1;ERLEC1;RNF8;BRCA1;POLQ;ERP29;IGF1R;FZD4;ENO1;MTOR;CASP9;MUL1;KDM1A;MAP3K6;PTPRF;TGFBR3;MAGI3;PTPN22;CE…	calcium-dependent cell-cell adhesion via plasma membrane cell adhesion molecules	11	0.00130366	CDH11;DSG1;PCDH12;CDH8;CDH23;DCHS1;CDH16;CDH5;PCDHB16;PCDHB6;CDH1	calcium ion transmembrane transport	9	0.0350726	TNR;ITGA9;JAK2;NR4A1;PTEN;THBS3;ERBB2;CSF1R;SYK;TP53
calmodulin binding	135	1.92636e-08	MYH6;SLC8A3;IQCF2;ITPKB;ATP2B2;UBR4;MYH8;RYR2;MYH13;MYH1;OBSCN;TTN;KCNH5;MYO1E;MYH9;GAP43;ADCY8;ADD2;MAP2;CDK5RAP2;EGFR;RYR3;MYH2;RYR1;NOS1;TRPV6;KCNQ1;MYH7;MYH3;SLC9A1;EPB41;CTH;IQGAP3;ASPM;ATP2B4;CAMK1G;KCNH1;STRN;SLC8A1;SPTBN1;PDE1A;MYO1B;CAMK1;FBXL2;ARPP21;MYH15;MYLK;PCYT1A;IQCG;WFS1;PPP3CA;CAMK2D;MYO10;RASGRF2;CAMK4;KCNN2;MYO6;AEBP1;TRPV5;NOS3;KCNQ3;UNC13B;DAPK1;SPTAN1;CAMSAP1;EDF1;GRIN1;MYO…	positive regulation of cytosolic calcium ion concentration	40	0.00131788	ADRA1A;PTPRC;AKAP6;GRM1;CAV3;NOS1;CNR1;RIC3;SLC8A1;NMUR2;TRPA1;ATP1A2;CACNA1D;ADCY8;ITPR1;CAMK2D;ESR1;BDKRB1;GPR55;GRIN2A;CHERP;TRPM4;PKD2;PIK3CG;GRIN2B;IBTK;RAMP3;CCR9;LPAR3;LIME1;GNB1;GNA13;TGFB1;PTGFR;ADRA1B;PLCE1;PKD1;CACNA1A;RYR1;PTGIR	negative regulation of adenylate cyclase activity	2	0.0365398	SCN5A;SCN10A
[truncated: 922 more rows]
