# Supplementary material for: Comprehensive signature analysis of drug metabolism differences in the White, Black and Asian prostate cancer patients
Source: Aging (Albany NY). 2021 Jun 18;13(12):16316–40. doi: 10.18632/aging.203158 (PMC8266326; doi:10.18632/aging.203158)
Supplement: Supplementary Table 9 [file aging-13-203158-s010.xlsx]

## Sheet: Sheet1
Supplementary Table 9. Comparison of multi-omics key functional modules with races differences.
Drug metabolism											Cytotoxic therapy										Endocrine therapy resistance				Response to radiation								Response to antineoplastic agent											Molecular targeted therapy
mRNA				Methylation				Mutations			miRNA					Methylation					lncRNA				miRNA				Methylation				miRNA				Methylation				Mutations			Methylation
genes	comparison	expression significant	function significant	genes	comparison	expression significant	function significant	genes	Mutations significant	function significant	Target genes	comparison	Target expression significant	function significant	remarks	genes	comparison	expression significant	function significant	remarks	genes	comparison	expression significant	function significant	Target genes	comparison	Target expression significant	function significant	genes	comparison	expression significant	function significant	Target genes	comparison	Target expression significant	function significant	genes	comparison	expression significant	function significant	genes	Mutations significant	function significant	genes	comparison	expression significant	function significant
UGT2B17	asian VS black	black	black	ADK	white&black	black	white	FMO5	white	white	CDKN1A	asian VS white	white	white	Platinum drug resistance	BAK1	black&asian	asian	black	Platinum drug resistance	LINC00052	black&asian	black	black	MEN1	asian VS black	asian	asian	ERCC2	white&black	black	white	STAR	asian VS white	asian	asian	SMYD3	white&black	black	white	DDX11	white	white	CYP2C8	white&black	white	black
UGT1A8	asian VS black	black	black	ADAL	white&black	black	white	FMO1	white	white	BBC3	asian VS white	white	white		GSTA1	black&asian	asian	black		LINC01087	black&asian	black	black	TRPC3	asian VS black	asian	asian	ANGPT2	white&black	black	white	NR3C1	asian VS white	asian	asian	UGT3A2	white&black	black	white	FIBIN	white	white	CYP2C19	white&black	white	black
UGT2B7	asian VS black	black	black	COX7C	white&black	black	white	GSTK1	white	white	MDM2	asian VS white	white	white		GSTM5	black&asian	asian	black		JPX	black&asian	black	black	GEN1	asian VS black	asian	asian	UBE2A	white&black	black	white	PRKAA1	asian VS white	asian	asian	FOXO3	white&black	black	white	CTNNB1	white	white
UGT1A1	black VS white	white	white	MTR	white&black	black	white	FMO3	white	white	XIAP	asian VS white	white	white		CYP2B6	white&black	white	black	Cisplatin	CCDC18-AS1	black&asian	black	black	INIP	asian VS black	asian	asian	GNB1	white&black	black	white					FMR1	white&black	black	white	DNMT3B	white	white
CYP3A4	black VS white	white	white	AGT	white&black	black	white	ADH6	white	white	MAPK1	asian VS white	white	white		A2M	white&black	white	black		PVT1	black&asian	black	black	TMEM109	asian VS white	white	white	FIGNL1	white&black	black	white					ASNS	white&black	black	white	EPO	white	white
UGT1A10	black VS white	white	white	BCHE	white&black	black	white	UGT2B4	white	white	AKT2	asian VS white	white	white		CYP2C9	white&black	white	black		SIAH2-AS1	black&asian	black	black	PML	asian VS white	white	white	UVSSA	white&black	black	white					HNRNPD	white&black	black	white	EGFR	white	white
UGT1A8	black VS white	white	white	ECE1	white&black	black	white	ADH1A	white	white	TP53	asian VS white	white	white		MPO	white&black	white	black		SNHG7	black&asian	black	black	MDM2	asian VS white	white	white	BHLHE40	white&black	black	white					GBA	white&black	black	white	TGFB1	white	white
CYP2B6	black VS white	white	white	ALDOA	white&black	black	white	ADH7	white	white	PIK3R1	asian VS white	white	white							LINC00992	black&asian	black	black	ELK1	asian VS white	white	white	CHEK2	white&black	black	white					RAP1A	white&black	black	white	CFLAR	white	white
UGT2B11	black VS white	white	white	PTS	white&black	black	white	UGT2B10	white	white	BAK1	asian VS white	white	white							SNHG6	black&asian	black	black	XRCC2	asian VS white	white	white	USP47	white&black	black	white					ATRX	white&black	black	white	KDM3B	white	white
AGT	black VS white	white	white	APIP	white&black	black	white	UGT2B15	white	white	SLC31A1	asian VS white	white	white							GATA3-AS1	black&asian	black	black	TP53	asian VS white	white	white	HMGN1	white&black	black	white					FOXO1	white&black	black	white	BRCA1	white	white
ABCB5	black VS white	white	white	PRDX5	white&black	black	white	UGT2B28	white	white											SP2-AS1	black&asian	black	black	BAK1	asian VS white	white	white	N4BP1	white&black	black	white					DHFR	white&black	black	white	ERRFI1	white	white
SLC36A3	black VS white	white	white	FAHD1	white&black	black	white	UGT2B7	white	white											GAS5	black&asian	black	black	GTF2H5	asian VS white	white	white	FMR1	white&black	black	white					RPL18A	white&black	black	white	CASP9	white	white
FOLR3	black VS white	white	white	DUOX2	white&black	black	white	KCNT2	white	white											ELOVL2-AS1	black&asian	black	black	CDKN1A	asian VS white	white	white	CYP2R1	white&black	black	white					SPIDR	white&black	black	white	ADAM15	white	white
CHRNA3	black VS white	white	white	DDAH1	white&black	black	white	NOS1	black	black											XIST	black&asian	black	black	MAPK14	asian VS white	white	white	ERCC5	white&black	black	white					NR3C1	white&black	black	white	GBA	white	white
GHSR	black VS white	white	white	OXCT1	white&black	black	white	CYP2B6	black	black											AGAP2-AS1	black&asian	black	black	GRB2	asian VS white	white	white	VCAM1	white&black	black	white					EDN1	white&black	black	white	HCN3	white	white
SLC17A6	black VS white	white	white	FIGNL1	white&black	black	white	CYP2C9	black	black											LINC01087	white&asian	white	white	MFAP4	asian VS white	white	white	H2AFX	white&black	black	white					AGTR2	white&black	black	white	SMYD3	white	white
UGT1A1	asian VS white	white	white	NDUFAF1	white&black	black	white	CYP2C8	black	black											JPX	white&asian	white	white	ACTR5	asian VS white	white	white	ASNS	white&black	black	white					PTAFR	white&black	black	white	WDR35	white	white
UGT2B17	asian VS white	white	white	ATP1B1	white&black	black	white	CYP1A1	black	black											PVT1	white&asian	white	white	STK11	asian VS white	white	white	NMU	white&black	black	white					TIMELESS	white&black	black	white	MSTN	white	white
UGT1A8	asian VS white	white	white	ABCD4	white&black	black	white	CAD	black	black											SIAH2-AS1	white&asian	white	white	AKT2	asian VS white	white	white	IMPACT	white&black	black	white					ASS1	white&black	black	white	GHSR	white	white
CYP1A1	asian VS white	white	white	APRT	white&black	black	white	CYP4F12	black	black											CCDC18-AS1	white&asian	white	white	PIK3R1	asian VS white	white	white	GPR88	white&black	black	white					PCNA	white&black	black	white	UGT3A2	white	white
UGT2B11	asian VS white	white	white	CYP2R1	white&black	black	white														SNHG7	white&asian	white	white	CERS1	asian VS white	white	white	NPTN	white&black	black	white									DHFR	white	white
				SDHC	white&black	black	white														SNHG6	white&asian	white	white	PDE6A	asian VS white	white	white	PAXIP1	white&black	black	white									EGR1	white	white
				NDUFS4	white&black	black	white														LINC00992	white&asian	white	white					NEDD4	white&black	black	white									CTNNA1	white	white
				CD320	white&black	black	white														GAS5	white&asian	white	white					TANC1	white&black	black	white									LARP1	white	white
				P2RX7	white&black	black	white														XIST	white&asian	white	white					CASP3	white&black	black	white									MAPK13	white	white
				HSP90AA1	white&black	black	white														SP2-AS1	white&asian	white	white					FANCG	white&black	black	white									ARG1	white	white
				ATP6V1B2	white&black	black	white														GATA3-AS1	white&asian	white	white					NABP1	white&black	black	white									SPIDR	white	white
				ASNS	white&black	black	white														AGAP2-AS1	white&asian	white	white					ERCC3	white&black	black	white									FBXO32	white	white
				AADAT	white&black	black	white														ELOVL2-AS1	white&black	white	white					CIRBP	white&black	black	white									HSF1	white	white
				AKR7A2	white&black	black	white														LINC00052	white&black	white	white					KARS	white&black	black	white									PTGR1	white	white
				ENO3	white&black	black	white														AC103760.1	white&black	white	white					CABP4	white&black	black	white									DDIT4	white	white
				DLAT	white&black	black	white														XIST	white&black	white	white					MDM2	white&black	black	white									FOXO1	white	white
				CYP2D6	white&black	black	white																						NPHP1	white&black	black	white									F7	white	white
				IDH3G	white&black	black	white																						RAD9B	white&black	black	white									RAD51	white	white
				PGK1	white&black	black	white																						OPN3	white&black	black	white									CDH1	white	white
				PPARA	white&black	black	white																						RRM1	white&black	black	white									SERPINF1	white	white
				NNT	white&black	black	white																						SLC4A10	white&black	black	white									JUP	white	white
				MTHFD2L	white&black	black	white																						GEN1	white&black	black	white									KAT7	white	white
				PCCB	white&black	black	white																						JUN	white&black	black	white									RPL18A	white	white
				ENO2	white&black	black	white																						HAMP	white&black	black	white									MAP4K1	white	white
				PTX3	white&black	black	white																						SNAI2	white&black	black	white									NUCB1	white	white
				CBR4	white&black	black	white																						RNF168	white&black	black	white									HMOX1	white	white
				PHGDH	white&black	black	white																						SLC1A2	white&black	black	white									PDGFB	white	white
				ADI1	white&black	black	white																						BCL3	white&black	black	white									ASNS	white	white
				GAPDH	white&black	black	white																						PPM1D	white&black	black	white									ATRX	white	white
				PAOX	white&black	black	white																						JUND	white&black	black	white									CPS1	white	white
				FPGS	white&black	black	white																						BAX	white&black	black	white									FMR1	white	white
				NR1I2	white&black	black	white																						CDKN1A	white&black	black	white									ICAM1	white	white
				BTD	white&black	black	white																						PTPRK	white&black	black	white									USP8	white	white
				UST	white&black	black	white																						ECT2	white&black	black	white									BLM	white	white
				MTHFD2	white&black	black	white																						SPIDR	white&black	black	white									GJB2	white	white
				ZBTB20	white&black	black	white																						CREB1	white&black	black	white									OPA1	white	white
				SLC25A12	white&black	black	white																						MSH6	white&black	black	white									PCK2	white	white
				NDUFB2	white&black	black	white																						NIPBL	white&black	black	white									TFAP4	white	white
				NDUFS8	white&black	black	white																						PER2	white&black	black	white									XRN1	white	white
				CYP4F12	white&black	black	white																						CNGB1	white&black	black	white									ADAM10	white	white
				KHSRP	white&black	black	white																						CLOCK	white&black	black	white									AGTR2	white	white
				LMBRD1	white&black	black	white																						GNA11	white&black	black	white									ZC3H12A	white	white
				EIF6	white&black	black	white																						YY1	white&black	black	white									RECQL5	white	white
				SDS	white&black	black	white																						HYAL3	white&black	black	white									KIF1B	white	white
				PAFAH1B1	white&black	black	white																						BABAM1	white&black	black	white									AQP1	white	white
				PKD2	white&black	black	white																						DNMT3A	white&black	black	white									SLC31A1	white	white
				LRTOMT	white&black	black	white																						INIP	white&black	black	white									METTL21C	white	white
				LDHC	white&black	black	white																						INTS3	white&black	black	white									HNRNPD	white	white
				DHFR	white&black	black	white																						SPRTN	white&black	black	white									TIMELESS	white	white
				GCSH	white&black	black	white																						B4GALT2	white&black	black	white									DAXX	white	white
				ACAT1	white&black	black	white																						RNF8	white&black	black	white
				ALDH5A1	white&black	black	white																						PPID	white&black	black	white
				NDUFS2	white&black	black	white																						FBXO4	white&black	black	white
				ARG2	white&black	black	white																						AKT2	white&black	black	white
				ENO4	white&black	black	white																						HMGCS1	white&black	black	white
				GPX3	white&black	black	white																						PCNA	white&black	black	white
				BAD	white&black	black	white																						ITGB1	white&black	black	white
				GALK1	white&black	black	white																						CBL	white&black	black	white
				PRKAG2	white&black	black	white																						F11R	white&black	black	white
				AK4	white&black	black	white																						PDE1B	white&black	black	white
				NR4A2	white&black	black	white																						MYC	white&black	black	white
				AK3	white&black	black	white																						TP53	white&black	black	white
				SLC25A13	white&black	black	white
				AGXT	white&black	black	white
				NDUFB4	white&black	black	white
				FMO1	white&black	black	white
				PPIF	white&black	black	white
				STAT5B	white&black	black	white
				PGAM1	white&black	black	white
				CYC1	white&black	black	white
				SLC19A3	white&black	black	white
				GUK1	white&black	black	white
				ADPGK	white&black	black	white
				ETHE1	white&black	black	white
				EDN1	white&black	black	white
				NDUFB7	white&black	black	white
				HDAC4	white&black	black	white
				AGTR2	white&black	black	white
				ESD	white&black	black	white
				NDUFA4	white&black	black	white
				PYCR2	white&black	black	white
				NAGK	white&black	black	white
				MTHFD1L	white&black	black	white
				PFKFB1	white&black	black	white
				UQCC2	white&black	black	white
				SHMT1	white&black	black	white
				GCHFR	white&black	black	white
				COX15	white&black	black	white
				UQCRC1	white&black	black	white
				FBP1	white&black	black	white
				UQCRFS1	white&black	black	white
				DUOX1	white&black	black	white
				AMDHD1	white&black	black	white
				ALDH1L2	white&black	black	white
				PID1	white&black	black	white
				ENO1	white&black	black	white
				PNKD	white&black	black	white
				ADSS	white&black	black	white
				ASS1	white&black	black	white
				UQCRC2	white&black	black	white
				SUCLG1	white&black	black	white
				ELOVL2	white&black	black	white
				CAV1	white&black	black	white
				NDUFV3	white&black	black	white
				DNAJC30	white&black	black	white
				INSR	white&black	black	white
				ECD	white&black	black	white
				CYP3A5	white&black	black	white
				PDE1B	white&black	black	white
				CSPG5	white&black	black	white
				NDUFA6	white&black	black	white
				CYP2C8	white&black	white	black
				CYP2B6	white&black	white	black
				CYP2C9	white&black	white	black
				CYP2C19	white&black	white	black
				GSTA1	white&black	white	black
				UGT2B15	white&black	white	black
				UGT1A1	white&black	white	black
				GSTA1	black&asian	asian	black
				GSTM5	black&asian	asian	black
				CYP2C8	white&asian	white	asian
				CYP2B6	white&asian	white	asian
				CYP2C19	white&asian	white	asian
				CYP2C18	white&asian	white	asian
				CYP2F1	white&asian	white	asian
				CYP3A4	white&asian	white	asian
				CYP2C9	white&asian	white	asian
				NUDT15	white&asian	white	asian
				CYP2A13	white&asian	white	asian
