# Supplementary material for: Comprehensive signature analysis of drug metabolism differences in the White, Black and Asian prostate cancer patients
Source: Aging (Albany NY). 2021 Jun 18;13(12):16316–40. doi: 10.18632/aging.203158 (PMC8266326; doi:10.18632/aging.203158)
Supplement: Supplementary Table 10 [file aging-13-203158-s011.xlsx]

## Sheet: supplementary table 10
Supplementary Table 10. The regulatory relationship of multi-omics drug metabolism-related core genes to each other and to cytotoxic therapy or endocrine therapy resistance genes reported in the literature.
Gene	Targert
ABCC1	CYP3A4
ABCC1	GSR
ABCC1	SPHK1
ABCC1	TP53
ABCC1	TYMS
ABCC1	UGT1A1
ABCC1	UGT1A8
AKR1C3	AR
AKR1C3	CYP1A1
AKR1C3	CYP3A4
AKR1C3	UGT1A1
AKR1C3	UGT1A10
AKR1C3	UGT1A8
AKR1C3	UGT2B17
AKR1C3	UGT2B7
AR	CREBBP
AR	CYP2B6
AR	CYP3A4
AR	HSP90AA1
AR	IGF1R
AR	JUN
AR	MTOR
AR	NR3C1
AR	PIM1
AR	SKP2
AR	SOX2
AR	STUB1
AR	TP53
AR	UGT2B17
AR	VAV3
AXL	STUB1
AXL	TP53
CABIN1	CREBBP
CABIN1	CYP3A4
CABIN1	MTOR
CABIN1	TP53
CCDC18-AS1	TIPARP
CNDP2	UGT1A8
COMT	CYP2B6
COMT	CYP3A4
COMT	NR3C1
COMT	UGT1A10
COMT	UGT1A8
COMT	UGT2B17
COMT	UGT2B7
CREBBP	NR3C1
CYP1A1	AR
CYP1A1	COMT
CYP1A1	CREBBP
CYP1A1	CYP2B6
CYP1A1	CYP3A4
CYP1A1	HSP90AA1
CYP1A1	JUN
CYP1A1	NR3C1
CYP1A1	RSF1
CYP1A1	TP53
CYP1A1	UGT1A1
CYP1A1	UGT1A10
CYP1A1	UGT1A8
CYP1A1	UGT2B17
CYP1A1	UGT2B7
CYP1A1	XRCC1
CYP2B6	GSR
CYP2B6	NR3C1
CYP2B6	SQLE
CYP2B6	TP53
CYP2B6	UGT1A8
CYP2B6	UGT2B17
CYP2B6	UGT2B7
CYP3A4	CYP2B6
CYP3A4	IGF1R
CYP3A4	NR3C1
CYP3A4	STUB1
CYP3A4	TP53
CYP3A4	UGT1A8
CYP3A4	UGT2B17
CYP3A4	UGT2B7
DDT	AKR1C3
DDT	AR
DDT	CYP1A1
DDT	CYP2B6
DDT	TP53
ERCC2	CYP1A1
ERCC2	PIM1
ERCC2	TP53
ERCC2	TYMS
ERCC2	XRCC1
FDFT1	CREBBP
FDFT1	CYP2B6
FDFT1	SQLE
FHL2	AR
FHL2	CREBBP
FHL2	SPHK1
FHL2	TP53
GAS5	ABCC1
GAS5	CNDP2
GAS5	DDT
GAS5	GSR
GAS5	HSP90AA1
GAS5	RSF1
HMGB1	CREBBP
HMGB1	HSP90AA1
HMGB1	NR3C1
HMGB1	TP53
hsa-miR-1237-3p	XIST
hsa-miR-1911-3p	XIST
hsa-miR-3130-3p	NR3C1
hsa-miR-612	TP53
HSP90AA1	AXL
HSP90AA1	CYP2B6
HSP90AA1	GSR
HSP90AA1	IGF1R
HSP90AA1	KDM4B
HSP90AA1	NR3C1
HSP90AA1	P4HB
HSP90AA1	RSF1
HSP90AA1	STUB1
HSP90AA1	TP53
HSP90AA1	TYMS
HSP90AA1	XRCC1
JPX	P4HB
JUN	CREBBP
JUN	GSR
JUN	HMGB1
JUN	HSP90AA1
JUN	IGF1R
JUN	MTOR
JUN	NR3C1
JUN	SOX2
JUN	SPHK1
JUN	TP53
KIF4A	TYMS
LDHA	GSR
LDHA	HSP90AA1
LDHA	JUN
LDHA	MDH2
LDHA	MTOR
LDHA	TP53
LINC00992	FDFT1
MDH2	GSR
Methylation1	UGT1A1
Methylation2	CYP3A4
Methylation3	CYP2B6
Methylation4	TP53
Methylation5	NR3C1
MGST1	CYP1A1
MGST1	CYP2B6
MGST1	CYP3A4
MGST1	GSR
MT-CYB	CYP2B6
MT-CYB	MDH2
MT-CYB	TYMS
MTOR	AXL
MTOR	CYP3A4
MTOR	HSP90AA1
MTOR	IGF1R
MTOR	SKP2
MTOR	SOX2
MTOR	TP53
NFE2L2	CREBBP
NFE2L2	CYP1A1
NFE2L2	GSR
NFE2L2	JUN
NFE2L2	MTOR
NFE2L2	TP53
NFE2L2	UGT1A1
NFE2L2	UGT1A8
NR3C1	STUB1
P4HB	GSR
P4HB	UGT1A8
PIM1	HSP90AA1
PIM1	MTOR
PIM1	SKP2
PIM1	XRCC1
SKP2	CREBBP
SKP2	STUB1
SKP2	TP53
SNHG6	NFE2L2
SNP1	CYP2B6
SNP2	UGT2B7
SNP3	CYP1A1
SNP4	TP53
SOX2	CREBBP
SOX2	TP53
TIPARP	CYP1A1
TP53	CREBBP
TP53	GSR
TP53	IGF1R
TP53	NR3C1
TP53	STUB1
TP53	XRCC1
TYMS	SQLE
TYMS	TP53
TYMS	UGT1A8
TYMS	XRCC1
UGT1A1	CNDP2
UGT1A1	COMT
UGT1A1	CYP2B6
UGT1A1	CYP3A4
UGT1A1	GUSB
UGT1A1	P4HB
UGT1A1	TYMS
UGT1A1	UGT1A10
UGT1A1	UGT1A8
UGT1A10	CYP2B6
UGT1A10	CYP3A4
UGT1A10	GUSB
UGT1A10	UGT1A8
UGT1A8	GUSB
UGT2B11	AKR1C3
UGT2B11	COMT
UGT2B11	CYP1A1
UGT2B11	CYP2B6
UGT2B11	CYP3A4
UGT2B11	GUSB
UGT2B11	UGT2B7
UGT2B17	GUSB
UGT2B7	GUSB
VAV3	AXL
VAV3	IGF1R
XIST	CABIN1
XIST	COMT
XIST	CREBBP
XIST	ERCC2
XIST	GUSB
XIST	IGF1R
XIST	JUN
XIST	MGST1
XIST	MT-CYB
XIST	MTOR
XIST	SQLE
XIST	STUB1
XIST	TP53
XIST	TYMS
XIST	XRCC1
