# Supplementary material for: Comprehensive signature analysis of drug metabolism differences in the White, Black and Asian prostate cancer patients
Source: Aging (Albany NY). 2021 Jun 18;13(12):16316–40. doi: 10.18632/aging.203158 (PMC8266326; doi:10.18632/aging.203158)
Supplement: Supplementary Table 12 [file aging-13-203158-s013.xlsx]

## Sheet: Sheet1
Supplementary Table 12. Spearman correlation values between drug sensitivities and gene expression of 22 antineoplastic drugs in the GDSC dataset and 24 antineoplastic drugs in the CTRP for pan-cancer cell lines.
platform	Genesymbols	CYP1A1	CYP2B6	CYP3A4	UGT1A8	UGT2B11	UGT2B17	UGT2B7	XIST	SNHG6
GDSC	Nilotinib	-0.04	0.03	-0.01	na	-0.04	0.05	0.03	0.03	na
GDSC	Nutlin-3a_(-)	-0.08	-0.02	0.06	na	0.04	0.07	0.1	0.04	na
GDSC	NVP-TAE684	-0.1	-0.04	-0.08	na	0	-0.14	0.02	-0.11	na
GDSC	PHA-665752	-0.07	-0.1	-0.15	na	-0.07	-0.06	0	-0.05	na
GDSC	5-Fluorouracil	-0.07	0.06	0.15	na	-0.01	0.12	-0.07	0.09	na
GDSC	Bicalutamide	0.02	-0.03	-0.04	na	-0.05	-0.06	0.08	0.03	na
GDSC	Cabozantinib	-0.09	0.02	0.07	na	0	0.02	-0.05	0.04	na
GDSC	Etoposide	-0.1	0.01	-0.01	na	-0.05	0.04	-0.04	0.04	na
GDSC	Mitomycin-C	-0.03	0.04	0.01	na	-0.06	0.06	-0.04	0.03	na
GDSC	Sorafenib	0.01	0	0.02	na	0.03	-0.09	-0.03	0.04	na
GDSC	Sunitinib	-0.13	0.07	0.06	na	0.08	0.04	-0.01	0.08	na
GDSC	Vinblastine	-0.1	0.06	0.01	na	0.05	0.05	-0.04	-0.03	na
GDSC	Erlotinib	0.01	-0.01	-0.09	na	-0.04	-0.07	0.01	-0.1	na
GDSC	Gefitinib	0.15	-0.12	-0.17	na	-0.04	-0.01	0.04	-0.06	na
GDSC	Cisplatin	-0.11	-0.06	-0.08	na	-0.05	-0.01	0.01	-0.05	na
GDSC	Docetaxel	0.01	-0.1	-0.25	na	-0.05	-0.11	-0.03	-0.11	na
GDSC	Doxorubicin	-0.04	0.01	-0.04	na	-0.06	0.03	-0.04	0	na
GDSC	Gemcitabine	-0.09	0.02	-0.01	na	-0.02	0.05	-0.01	0.03	na
GDSC	Imatinib	-0.04	-0.13	-0.17	na	-0.1	-0.12	0.02	-0.02	na
GDSC	Lapatinib	0	-0.11	-0.2	na	-0.03	-0.09	0.03	-0.09	na
GDSC	Paclitaxel	-0.03	0.06	-0.02	na	0	-0.04	0.03	-0.01	na
GDSC	Tamoxifen	0	-0.01	-0.02	na	0.01	0.05	0.07	0.03	na
CTRP	L-685458	0.06	0.01	0.06	0.02	na	0.04	na	0	0.12
CTRP	nilotinib	0	-0.01	0.04	-0.01	na	-0.05	na	0	0.1
CTRP	nutlin-3	-0.1	0.1	0.1	0.08	na	0.03	na	0.12	0.25
CTRP	NVP-TAE684	-0.04	0.08	0.05	0.06	na	0.02	na	-0.01	0.13
CTRP	RAF265	0.03	0.04	0.06	0.07	na	-0.02	na	0	0.17
CTRP	topotecan	-0.12	0	0.07	0.08	na	0.04	na	0.09	0.32
CTRP	abiraterone	0.16	-0.02	0.01	-0.11	na	0.04	na	-0.13	-0.16
CTRP	cabozantinib	-0.08	0.07	0	0.05	na	0.01	na	0.07	0.12
CTRP	cyclophosphamide	-0.03	0.03	0.02	-0.07	na	-0.03	na	0.09	-0.06
CTRP	etoposide	-0.14	0.05	0.08	0.08	na	0.06	na	0.08	0.3
CTRP	fluorouracil	-0.03	0.06	0.19	0.05	na	0.07	na	0.07	0.22
CTRP	mitomycin	-0.08	0.05	0.09	0.05	na	0.07	na	0.04	0.24
CTRP	sorafenib	0	0.04	0.03	-0.02	na	0.01	na	0.04	0.16
CTRP	sunitinib	-0.07	0.13	0.05	0.04	na	0.1	na	0.09	0.28
CTRP	thalidomide	-0.01	0.01	-0.03	0.04	na	-0.05	na	0.03	0.01
CTRP	docetaxel	-0.06	0.06	0.09	0.1	na	0.14	na	0.16	0.24
CTRP	doxorubicin	-0.1	0.05	0.11	0.02	na	0.06	na	0.14	0.29
CTRP	gemcitabine	-0.14	0.06	0.12	0.08	na	0.05	na	0.11	0.29
CTRP	imatinib	0	0.07	0.07	0.04	na	0.01	na	0.01	0.18
CTRP	lapatinib	0.22	0.02	0.14	0.04	na	0.09	na	0.03	0.11
CTRP	paclitaxel	-0.06	0.04	0.07	0.09	na	0.07	na	0.11	0.22
CTRP	tamoxifen	-0.02	0.08	0.05	0.01	na	0.02	na	0.03	0.09
CTRP	erlotinib	0.2	0	0.13	-0.04	na	0.09	na	0.02	-0.05
CTRP	gefitinib	0.19	0	0.08	-0.07	na	0.08	na	-0.05	-0.01
Drug sensitivity:define as（ 1−AUC） in GDSC and define as [1−(AUC/30)] in CTRP. Negative values represent drug resistance (red bars) and positive values represent drug sensitivity (blue bars) for Pan-cancer cell lines.
